# Supplementary material for: Systematic approach to outcome assessment from coded electronic healthcare records in the DaRe2THINK NHS-embedded randomised trial
Source: bioRxiv or medRxiv preprint supplement (doi:10.1101/2022.05.24.22275434), 2022-05-25
Supplement: Supplementary file [file media-1.pdf]

## Appendix 1: DaRe2THINK code lists

|                                                                            |            |
|----------------------------------------------------------------------------|------------|
| <b>Chapter 1. Code lists for selection criteria .....</b>                  | <b>3</b>   |
| Table S1. Atrial fibrillation Aurum codes .....                            | 3          |
| Table S2. Anticoagulant Aurum product codes.....                           | 5          |
| Table S3. Low molecular weight heparin Aurum product codes .....           | 7          |
| Table S4. Stroke Aurum codes .....                                         | 10         |
| Table S5. Transient ischaemic attack selection Aurum codes .....           | 13         |
| Table S6. Arterial thromboembolism Aurum codes .....                       | 14         |
| Table S7. Myocardial infarction Aurum codes .....                          | 17         |
| Table S8. Peripheral arterial disease Aurum codes .....                    | 20         |
| Table S9. Aortic plaque Aurum codes.....                                   | 21         |
| Table S10. Diabetes Aurum codes .....                                      | 22         |
| Table S11. Anti-Diabetic Aurum product codes .....                         | 35         |
| Table S12. Hypertension Aurum codes .....                                  | 51         |
| Table S13. Anti-Hypertension Aurum product codes .....                     | 54         |
| Table S14. Heart failure selection Aurum codes .....                       | 77         |
| Table S15. Loop Diuretics Aurum product codes .....                        | 79         |
| Table S16. Gastrointestinal and intracranial Bleeding Aurum codes .....    | 82         |
| Table S17. Gastrointestinal tract ulcer Aurum codes .....                  | 87         |
| Table S18. Brain injury Aurum codes .....                                  | 94         |
| Table S19. Spinal Injury Aurum codes .....                                 | 114        |
| Table S20. Eye Injury Aurum codes .....                                    | 115        |
| Table S21. Estimated glomerular filtration rate Aurum codes .....          | 116        |
| Table S22. Azole Aurum codes.....                                          | 117        |
| Table S23. Dementia Aurum codes .....                                      | 118        |
| <b>Chapter 2. Code lists for trial outcomes .....</b>                      | <b>124</b> |
| Table S24. Cardiovascular mortality HES (ICD10) codes .....                | 124        |
| Table S25. Ischaemic stroke Aurum codes .....                              | 125        |
| Table S26. Ischaemic stroke HES (ICD10) codes.....                         | 128        |
| Table S27. Transient ischaemic attack outcome Aurum codes .....            | 129        |
| Table S28. Transient ischaemic attack HES (ICD10) codes .....              | 131        |
| Table S29. Venous thromboembolism and pulmonary embolism Aurum codes ..... | 132        |
| Table S30. Arterial thromboembolic Aurum codes.....                        | 145        |
| Table S31. Thromboembolic HES (ICD10) codes .....                          | 153        |
| Table S32. Myocardial infarction outcome Aurum codes .....                 | 155        |
| Table S33. Myocardial infarction HES (ICD10) codes .....                   | 159        |
| Table S34. Vascular dementia Aurum codes.....                              | 160        |
| Table S35. Vascular dementia HES (ICD10) codes .....                       | 162        |
| Table S36. Gastrointestinal bleeding Aurum codes .....                     | 163        |

|                                                                                |            |
|--------------------------------------------------------------------------------|------------|
| Table S37. Gastrointestinal bleeding HES (ICD10) codes.....                    | 168        |
| Table S38. Bleeding at other anatomy sites Aurum codes.....                    | 169        |
| Table S39. Bleeding at other anatomy sites HES (ICD10) codes.....              | 188        |
| Table S40. Hospitalisation Aurum codes.....                                    | 190        |
| Table S41. Intracranial haemorrhage Aurum codes.....                           | 199        |
| Table S42. Intracranial haemorrhage HES (ICD10) codes.....                     | 205        |
| Table S43. Heart failure outcome Aurum codes.....                              | 206        |
| Table S44. Heart failure HES (ICD10) codes.....                                | 209        |
| <b>Chapter 3. Code lists for baseline characteristics.....</b>                 | <b>210</b> |
| Table S45. Ethnicity Aurum codes.....                                          | 210        |
| Table S46. Smoking Aurum codes.....                                            | 219        |
| Table S47. Measurements Aurum codes.....                                       | 222        |
| Table S48. Blood test Aurum codes.....                                         | 224        |
| Table S49. Atrial ablation Aurum codes.....                                    | 228        |
| Table S50. Hyperthyroidism Aurum codes.....                                    | 230        |
| Table S51. Hypothyroidism Aurum codes.....                                     | 232        |
| Table S52. Chronic obstructive pulmonary disease Aurum codes.....              | 235        |
| Table S53. Diabetic retinopathy Aurum codes.....                               | 241        |
| Table S54. Retinal vascular occlusion Aurum codes.....                         | 243        |
| Table S55. Glaucoma Aurum codes.....                                           | 244        |
| Table S56. Age-related macular degeneration Aurum codes.....                   | 248        |
| Table S57. Retinal Laser Aurum codes.....                                      | 249        |
| Table S58. Vitrectomy Aurum codes.....                                         | 250        |
| Table S59. Scleral buckle Aurum codes.....                                     | 251        |
| Table S60. Intravitreal injection Aurum codes.....                             | 252        |
| Table S61. Antiplatelet Aurum product codes.....                               | 253        |
| Table S62. Thiazide diuretics Aurum product codes.....                         | 256        |
| Table S63. Thiazide like diuretics Aurum product codes.....                    | 261        |
| Table S64. Potassium sparing diuretics Aurum product codes.....                | 262        |
| Table S65. Dihydropyridines Aurum product codes.....                           | 264        |
| Table S66. Non Dihydropyridines Aurum product codes.....                       | 269        |
| Table S67. Angiotensin converting enzyme inhibitors Aurum product codes.....   | 273        |
| Table S68. Angiotensin II receptor blocker Aurum product codes.....            | 275        |
| Table S69. Beta blockers Aurum product codes.....                              | 279        |
| Table S70. Alpha blockers Aurum product codes.....                             | 283        |
| Table S71. Aldosterone Aurum product codes.....                                | 285        |
| Table S72. Other antihypertensive Aurum product codes.....                     | 286        |
| Table S73. Antiarrhythmic drugs class 1 Aurum product codes.....               | 289        |
| Table S74. Antiarrhythmic drugs class 3 Aurum product codes.....               | 292        |
| Table S75. Digoxin Aurum product codes.....                                    | 293        |
| Table S76. Sodium-glucose co-transporter-2 inhibitors Aurum product codes..... | 297        |
| Table S77. Nonsteroidal anti-inflammatory drug Aurum product codes.....        | 299        |

## Chapter 1. Code lists for selection criteria

**Table S1. Atrial fibrillation Aurum codes**

| Term                                                      | MedCode ID        | SNOMED CT<br>Concept ID | SNOMED CT<br>DescriptionID |
|-----------------------------------------------------------|-------------------|-------------------------|----------------------------|
| AF - Atrial fibrillation                                  | 3299911000006116  | 49436004                | 1230726010                 |
| AF - Paroxysmal atrial fibrillation                       | 5669591000006113  | 282825002               | 421232012                  |
| Atrial fibrillation                                       | 82343012          | 49436004                | 82343012                   |
| Atrial fibrillation and flutter                           | 300130013         | 195080001               | 300130013                  |
| Atrial fibrillation and flutter NOS                       | 300132017         | 195080001               | 300130013                  |
| Atrial fibrillation annual review                         | 406861000000119   | 248411000000105         | 406861000000119            |
| Atrial fibrillation confirmed                             | 1823951000006111  | 1823951000006107        | 1823951000006111           |
| Atrial fibrillation detected                              | 8439861000006115  | 1066831000000104        | 2679661000000115           |
| Atrial fibrillation monitoring first letter               | 408081000000116   | 717221000000101         | 1569761000000112           |
| Atrial fibrillation monitoring invitation                 | 8214691000006119  | 711411000000101         | 1555841000000110           |
| Atrial fibrillation monitoring second letter              | 408101000000110   | 716981000000106         | 1569531000000111           |
| Atrial fibrillation monitoring telephone invitation       | 8218281000006110  | 716721000000107         | 1569271000000111           |
| Atrial fibrillation monitoring telephone invite           | 408241000000115   | 716721000000107         | 1570381000000119           |
| Atrial fibrillation monitoring third letter               | 408121000000118   | 716181000000109         | 1568741000000115           |
| Atrial fibrillation monitoring verbal invitation          | 8218591000006111  | 717011000000100         | 1569561000000118           |
| Atrial fibrillation monitoring verbal invite              | 408141000000113   | 717011000000100         | 1570401000000119           |
| Atrial fibrillation resolved                              | 294601000000110   | 196371000000102         | 294601000000110            |
| Atrial fibrillation with rapid ventricular response       | 8037691000006113  | 120041000119109         | 2981207015                 |
| Chronic atrial fibrillation                               | 2675253013        | 426749004               | 2675253013                 |
| Controlled atrial fibrillation                            | 5887651000006116  | 300996004               | 442207015                  |
| ECG: atrial fibrillation                                  | 256478018         | 164889003               | 256478018                  |
| Electrocardiographic atrial fibrillation                  | 4586611000006112  | 164889003               | 3300048013                 |
| Evaluation of AF (atrial fibrillation) burden             | 12734511000006115 | 143601000000104         | 1628691000000119           |
| Evaluation of atrial fibrillation rate control            | 12736851000006112 | 1127481000000104        | 1855311000000119           |
| H/O: atrial fibrillation                                  | 456154015         | 312442005               | 456154015                  |
| History of atrial fibrillation                            | 6016401000006115  | 312442005               | 2986292016                 |
| History of maze procedure for atrial fibrillation         | 7100011000006116  | 429218009               | 2695416012                 |
| Insertion of pacemaker for control of atrial fibrillation | 7375931000006117  | 449863006               | 2912517016                 |
| Intermittent atrial fibrillation                          | 5669611000006119  | 282825002               | 421234013                  |
| Lone atrial fibrillation                                  | 5057261000006110  | 233910005               | 350464013                  |
| Longstanding persistent atrial fibrillation               | 7610331000006110  | 706923002               | 3027950014                 |
| Maze procedure for atrial fibrillation                    | 7099921000006111  | 429211003               | 2694655012                 |
| Non-rheumatic atrial fibrillation                         | 350465014         | 233911009               | 350465014                  |
| NRAF - Non-rheumatic atrial fibrillation                  | 5057281000006117  | 233911009               | 350466010                  |
| PAF - Paroxysmal atrial fibrillation                      | 5669601000006117  | 282825002               | 421233019                  |
| Paroxysmal atrial fibrillation                            | 421235014         | 282825002               | 421235014                  |

|                                                                                                                                            |                   |                  |                  |
|--------------------------------------------------------------------------------------------------------------------------------------------|-------------------|------------------|------------------|
| Permanent atrial fibrillation                                                                                                              | 636721000000112   | 440028005        | 2793259018       |
| Persistent atrial fibrillation                                                                                                             | 636701000000115   | 440059007        | 2793372019       |
| QOF (Quality and Outcomes Framework) atrial fibrillation quality indicator-related care invitation                                         | 12626271000006110 | 1110851000000100 | 2779681000000117 |
| QOF (Quality and Outcomes Framework) atrial fibrillation quality indicator-related care invitation using preferred method of communication | 12734281000006112 | 133111000000106  | 1628151000000119 |
| Rapid atrial fibrillation                                                                                                                  | 6043781000006115  | 314208002        | 458527016        |
| Transient cerebral ischaemia due to atrial fibrillation                                                                                    | 7064691000006118  | 426814001        | 2675245017       |
| Transient cerebral ischemia due to atrial fibrillation                                                                                     | 7064701000006118  | 426814001        | 2675244018       |

**Table S2. Anticoagulant Aurum product codes**

| Term from EMIS                                                   | Prod code ID     | dmd ID            | Drug substance name           |
|------------------------------------------------------------------|------------------|-------------------|-------------------------------|
| warfarin wbp tablets                                             | 1531941000033113 |                   |                               |
| warfarin wbp tablets 1 mg                                        | 1532041000033119 |                   |                               |
| warfarin wbp tablets 3 mg                                        | 1532141000033115 |                   |                               |
| warfarin wbp tablets 5 mg                                        | 1532241000033110 |                   |                               |
| warfarin (evans) tablets 3 mg                                    | 1532341000033117 |                   |                               |
| sinthrome tablets 4 mg                                           | 1337441000033110 |                   |                               |
| warfarin 1mg tablets                                             | 1531641000033118 | 319733000         | Warfarin sodium               |
| marevan 1mg tablets (advanz pharma)                              | 868141000033114  | 933311000001105   | Warfarin sodium               |
| marevan 3mg tablets (advanz pharma)                              | 868241000033119  | 284011000001104   | Warfarin sodium               |
| warfarin 3mg tablets                                             | 1531741000033110 | 319734006         | Warfarin sodium               |
| warfarin 5mg tablets                                             | 1531841000033117 | 319735007         | Warfarin sodium               |
| marevan 5mg tablets (advanz pharma)                              | 868341000033112  | 461911000001100   | Warfarin sodium               |
| marevan 500microgram tablets (advanz pharma)                     | 1819741000033117 | 204811000001109   | Warfarin sodium               |
| warfarin 500microgram tablets                                    | 1819641000033114 | 319736008         | Warfarin sodium               |
| acenocoumarol 1mg tablets                                        | 3097541000033112 | 319740004         | Acenocoumarol                 |
| sinthrome 1mg tablets (norgine pharmaceuticals ltd)              | 1337341000033116 | 738511000001103   | Acenocoumarol                 |
| phenindione 10mg tablets                                         | 1081541000033110 | 319745009         | Phenindione                   |
| phenindione 25mg tablets                                         | 1082341000033112 | 319746005         | Phenindione                   |
| phenindione 50mg tablets                                         | 1082441000033118 | 319747001         | Phenindione                   |
| coumadin 4mg tablets (imported (canada))                         | 6112441000033111 | 18509011000001102 | Warfarin sodium               |
| apixaban 2.5mg tablets                                           | 6444441000033114 | 703907006         | Apixaban                      |
| eliquis 2.5mg tablets (bristol-myers squibb pharmaceuticals ltd) | 6444541000033110 | 19506911000001105 | Apixaban                      |
| eliquis 5mg tablets (bristol-myers squibb pharmaceuticals ltd)   | 8233041000033112 | 21677511000001105 | Apixaban                      |
| apixaban 5mg tablets                                             | 8232941000033119 | 703908001         | Apixaban                      |
| warfarin 10mg/5ml oral suspension                                | 2639041000033119 | 8798011000001109  | Warfarin sodium               |
| warfarin 1mg/5ml oral solution                                   | 6000541000033119 | 8798111000001105  | Warfarin sodium               |
| warfarin 1mg/5ml oral suspension                                 | 6000841000033117 | 8798211000001104  | Warfarin sodium               |
| warfarin 3mg/5ml oral solution                                   | 6000641000033118 | 8798511000001101  | Warfarin sodium               |
| warfarin 3mg/5ml oral suspension                                 | 6000941000033113 | 8798611000001102  | Warfarin sodium               |
| warfarin 5mg/5ml oral solution                                   | 6000741000033110 | 8798711000001106  | Warfarin sodium               |
| warfarin 5mg/5ml oral suspension                                 | 2620141000033114 | 8798811000001103  | Warfarin sodium               |
| dabigatran etexilate 110mg capsules                              | 4500341000033115 | 13532811000001109 | Dabigatran etexilate mesilate |
| pradaxa 110mg capsules (boehringer ingelheim ltd)                | 4500541000033110 | 13505411000001109 | Dabigatran etexilate mesilate |
| dabigatran etexilate 75mg capsules                               | 4500241000033113 | 13532911000001104 | Dabigatran etexilate mesilate |
| pradaxa 75mg capsules (boehringer ingelheim ltd)                 | 4500441000033114 | 13504711000001102 | Dabigatran etexilate mesilate |
| rivaroxaban 10mg tablets                                         | 4656341000033115 | 14254711000001104 | Rivaroxaban                   |
| xarelto 10mg tablets (bayer plc)                                 | 4656441000033114 | 14237311000001106 | Rivaroxaban                   |
| warfarin 1mg/ml oral suspension sugar free                       | 6066441000033118 | 18290011000001102 | Warfarin sodium               |

|                                                           |                   |                   |                               |
|-----------------------------------------------------------|-------------------|-------------------|-------------------------------|
| dabigatran etexilate 150mg capsules                       | 6436141000033111  | 19469811000001101 | Dabigatran etexilate mesilate |
| pradaxa 150mg capsules (boehringer ingelheim ltd)         | 6436241000033116  | 19465811000001104 | Dabigatran etexilate mesilate |
| rivaroxaban 15mg tablets                                  | 6511341000033117  | 19842111000001101 | Rivaroxaban                   |
| xarelto 15mg tablets (bayer plc)                          | 6511541000033112  | 19840811000001107 | Rivaroxaban                   |
| xarelto 20mg tablets (bayer plc)                          | 6511641000033113  | 19841411000001101 | Rivaroxaban                   |
| rivaroxaban 20mg tablets                                  | 6511441000033111  | 19842211000001107 | Rivaroxaban                   |
| xarelto 2.5mg tablets (bayer plc)                         | 9704641000033115  | 27160311000001106 | Rivaroxaban                   |
| rivaroxaban 2.5mg tablets                                 | 9704541000033116  | 27810711000001104 | Rivaroxaban                   |
| lixiana 15mg tablets (daiichi sankyo uk ltd)              | 10493841000033112 | 29902111000001100 | Edoxaban tosilate             |
| edoxaban 15mg tablets                                     | 10493541000033110 | 29903211000001100 | Edoxaban tosilate             |
| edoxaban 30mg tablets                                     | 10493641000033111 | 29903311000001108 | Edoxaban tosilate             |
| lixiana 30mg tablets (daiichi sankyo uk ltd)              | 10493941000033116 | 29902411000001105 | Edoxaban tosilate             |
| lixiana 60mg tablets (daiichi sankyo uk ltd)              | 10494041000033119 | 29902711000001104 | Edoxaban tosilate             |
| edoxaban 60mg tablets                                     | 10493741000033119 | 29903411000001101 | Edoxaban tosilate             |
| xarelto 15mg / 20mg treatment initiation pack (bayer plc) | 12407141000033118 | 34793111000001102 |                               |
| rivaroxaban 15mg tablets and rivaroxaban 20mg tablets     | 12407041000033117 | 34819111000001102 |                               |

**Table S3. Low molecular weight heparin Aurum product codes**

| Term from EMIS                                                                             | Prod code ID      | dmd ID            | Drug substance name |
|--------------------------------------------------------------------------------------------|-------------------|-------------------|---------------------|
| Clexane 300mg/3ml solution for injection multidose vials (Sanofi)                          | 4153241000033118  | 11507011000001102 | Enoxaparin sodium   |
| Enoxaparin sodium 300mg/3ml solution for injection vials                                   | 4153141000033113  | 11509311000001109 | Enoxaparin sodium   |
| Inhixa 300mg/3ml solution for injection multidose vials (Techdow Pharma England Ltd)       | 13711341000033114 | 38232211000001100 | Enoxaparin sodium   |
| Clexane Forte 120mg/0.8ml solution for injection pre-filled syringes (Sanofi)              | 2732541000033114  | 4198711000001100  | Enoxaparin sodium   |
| Enoxaparin sodium 120mg/0.8ml solution for injection pre-filled syringes                   | 2041741000033113  | 36563911000001108 | Enoxaparin sodium   |
| Inhixa 120mg/0.8ml solution for injection pre-filled syringes (Techdow Pharma England Ltd) | 12988541000033114 | 36784211000001100 | Enoxaparin sodium   |
| Arovi 120mg/0.8ml solution for injection pre-filled syringes (ROVI Biotech Ltd)            | 12584741000033119 | 35559211000001107 | Enoxaparin sodium   |
| Clexane 100mg/1ml solution for injection pre-filled syringes (Sanofi)                      | 274941000033116   | 4199111000001108  | Enoxaparin sodium   |
| Arovi 100mg/1ml solution for injection pre-filled syringes (ROVI Biotech Ltd)              | 12584641000033111 | 35566911000001104 | Enoxaparin sodium   |
| Inhixa 100mg/1ml solution for injection pre-filled syringes (Techdow Pharma England Ltd)   | 12373141000033110 | 34701011000001102 | Enoxaparin sodium   |
| Enoxaparin Becat 100mg/1ml solution for injection pre-filled syringes (ROVI Biotech Ltd)   | 12476641000033118 | 35084011000001109 | Enoxaparin sodium   |
| Enoxaparin sodium 100mg/1ml solution for injection pre-filled syringes                     | 516641000033117   | 36564011000001106 | Enoxaparin sodium   |
| Clexane 40mg/0.4ml solution for injection pre-filled syringes (Sanofi)                     | 276541000033115   | 3825411000001104  | Enoxaparin sodium   |
| Enoxaparin sodium 40mg/0.4ml solution for injection pre-filled syringes                    | 517141000033112   | 36565711000001107 | Enoxaparin sodium   |
| Enoxaparin Becat 40mg/0.4ml solution for injection pre-filled syringes (ROVI Biotech Ltd)  | 12476241000033116 | 35083411000001103 | Enoxaparin sodium   |
| Inhixa 40mg/0.4ml solution for injection pre-filled syringes (Techdow Pharma England Ltd)  | 12372841000033114 | 34700211000001101 | Enoxaparin sodium   |
| Arovi 40mg/0.4ml solution for injection pre-filled syringes (ROVI Biotech Ltd)             | 12585041000033116 | 35569011000001109 | Enoxaparin sodium   |
| Clexane 60mg/0.6ml solution for injection pre-filled syringes (Sanofi)                     | 275041000033116   | 4199811000001101  | Enoxaparin sodium   |
| Enoxaparin sodium 60mg/0.6ml solution for injection pre-filled syringes                    | 516741000033114   | 38895011000001100 | Enoxaparin sodium   |
| Enoxaparin Becat 60mg/0.6ml solution for injection pre-filled syringes (ROVI Biotech Ltd)  | 12476341000033114 | 35083611000001100 | Enoxaparin sodium   |
| Inhixa 60mg/0.6ml solution for injection pre-filled syringes (Techdow Pharma England Ltd)  | 12372941000033118 | 34700511000001103 | Enoxaparin sodium   |
| Arovi 60mg/0.6ml solution for injection pre-filled syringes (ROVI Biotech Ltd)             | 12585141000033117 | 35568611000001106 | Enoxaparin sodium   |
| Clexane 80mg/0.8ml solution for injection pre-filled syringes (Sanofi)                     | 275141000033117   | 4199511000001104  | Enoxaparin sodium   |
| Arovi 80mg/0.8ml solution for injection pre-filled syringes (ROVI Biotech Ltd)             | 12585241000033112 | 35567911000001101 | Enoxaparin sodium   |
| Inhixa 80mg/0.8ml solution for injection pre-filled syringes (Techdow Pharma England Ltd)  | 12373041000033111 | 34700811000001100 | Enoxaparin sodium   |
| Enoxaparin Becat 80mg/0.8ml solution for injection pre-filled syringes (ROVI Biotech Ltd)  | 12476441000033115 | 35083811000001101 | Enoxaparin sodium   |
| Enoxaparin sodium 80mg/0.8ml solution for injection pre-filled syringes                    | 516841000033116   | 38895111000001104 | Enoxaparin sodium   |
| Clexane Forte 150mg/1ml solution for injection pre-filled syringes (Sanofi)                | 2732641000033110  | 4198211000001107  | Enoxaparin sodium   |
| Enoxaparin sodium 150mg/1ml solution for injection pre-filled syringes                     | 2041941000033111  | 38895211000001105 | Enoxaparin sodium   |

|                                                                                           |                   |                   |                   |
|-------------------------------------------------------------------------------------------|-------------------|-------------------|-------------------|
| Arovi 150mg/1ml solution for injection pre-filled syringes (ROVI Biotech Ltd)             | 12584841000033112 | 35559411000001106 | Enoxaparin sodium |
| Inhixa 150mg/1ml solution for injection pre-filled syringes (Techdow Pharma England Ltd)  | 12988641000033110 | 36784411000001101 | Enoxaparin sodium |
| Clexane 20mg/0.2ml solution for injection pre-filled syringes (Sanofi)                    | 276441000033116   | 3826311000001101  | Enoxaparin sodium |
| Enoxaparin sodium 20mg/0.2ml solution for injection pre-filled syringes                   | 517041000033113   | 38896011000001109 | Enoxaparin sodium |
| Arovi 20mg/0.2ml solution for injection pre-filled syringes (ROVI Biotech Ltd)            | 12584941000033116 | 35569511000001101 | Enoxaparin sodium |
| Enoxaparin Becat 20mg/0.2ml solution for injection pre-filled syringes (ROVI Biotech Ltd) | 12476141000033111 | 35083211000001102 | Enoxaparin sodium |
| Inhixa 20mg/0.2ml solution for injection pre-filled syringes (Techdow Pharma England Ltd) | 12372741000033116 | 34699911000001109 | Enoxaparin sodium |
| Tinzaparin sodium 12,000units/0.6ml solution for injection pre-filled syringes            | 10046341000033113 | 28566111000001107 | Tinzaparin sodium |
| Innohep 12,000units/0.6ml solution for injection pre-filled syringes (LEO Pharma)         | 10046641000033117 | 28499911000001109 | Tinzaparin sodium |
| Innohep 16,000units/0.8ml solution for injection pre-filled syringes (LEO Pharma)         | 10046741000033114 | 28498711000001103 | Tinzaparin sodium |
| Tinzaparin sodium 16,000units/0.8ml solution for injection pre-filled syringes            | 10046441000033119 | 28566311000001109 | Tinzaparin sodium |
| Tinzaparin sodium 8,000units/0.4ml solution for injection pre-filled syringes             | 10046241000033115 | 28566511000001103 | Tinzaparin sodium |
| Innohep 8,000units/0.4ml solution for injection pre-filled syringes (LEO Pharma)          | 10046541000033118 | 28501011000001100 | Tinzaparin sodium |
| Innohep 10,000units/0.5ml solution for injection pre-filled syringes (LEO Pharma)         | 763041000033118   | 3918011000001100  | Tinzaparin sodium |
| Tinzaparin sodium 10,000units/0.5ml solution for injection pre-filled syringes            | 1440541000033116  | 35918811000001101 | Tinzaparin sodium |
| Innohep 14,000units/0.7ml solution for injection pre-filled syringes (LEO Pharma)         | 763141000033119   | 3919011000001105  | Tinzaparin sodium |
| Tinzaparin sodium 14,000units/0.7ml solution for injection pre-filled syringes            | 1440641000033115  | 35918911000001106 | Tinzaparin sodium |
| Innohep 18,000units/0.9ml solution for injection pre-filled syringes (LEO Pharma)         | 762941000033111   | 3920011000001106  | Tinzaparin sodium |
| Tinzaparin sodium 18,000units/0.9ml solution for injection pre-filled syringes            | 1440741000033112  | 35919011000001102 | Tinzaparin sodium |
| Innohep 2,500units/0.25ml solution for injection pre-filled syringes (LEO Pharma)         | 2149141000033117  | 4120211000001102  | Tinzaparin sodium |
| Tinzaparin sodium 2,500units/0.25ml solution for injection pre-filled syringes            | 2149041000033116  | 35919111000001101 | Tinzaparin sodium |
| Innohep 20,000units/2ml solution for injection vials (LEO Pharma)                         | 1781941000033119  | 4121311000001100  | Tinzaparin sodium |
| Tinzaparin sodium 20,000units/2ml solution for injection vials                            | 1781841000033110  | 35919211000001107 | Tinzaparin sodium |
| Innohep 3,500units/0.35ml solution for injection pre-filled syringes (LEO Pharma)         | 1620241000033118  | 3916311000001101  | Tinzaparin sodium |
| Tinzaparin sodium 3,500units/0.35ml solution for injection pre-filled syringes            | 1700641000033119  | 35919311000001104 | Tinzaparin sodium |
| Innohep 4,500units/0.45ml solution for injection pre-filled syringes (LEO Pharma)         | 1620341000033111  | 4120611000001100  | Tinzaparin sodium |
| Tinzaparin sodium 4,500units/0.45ml solution for injection pre-filled syringes            | 1700741000033111  | 35919411000001106 | Tinzaparin sodium |
| Innohep 40,000units/2ml solution for injection vials (LEO Pharma)                         | 762041000033110   | 4121711000001101  | Tinzaparin sodium |
| Tinzaparin sodium 40,000units/2ml solution for injection vials                            | 1439841000033110  | 35919511000001105 | Tinzaparin sodium |
| Dalteparin sodium 7,500units/0.3ml solution for injection pre-filled syringes             | 2640441000033116  | 4865111000001103  | Dalteparin sodium |
| Fragmin 7,500units/0.3ml solution for injection pre-filled syringes (Pfizer Ltd)          | 2640341000033110  | 4864211000001108  | Dalteparin sodium |



|                                                                                    |                  |                   |                   |
|------------------------------------------------------------------------------------|------------------|-------------------|-------------------|
| Fragmin 10,000units/1ml solution for injection ampoules (Pfizer Ltd)               | 610941000033116  | 3968911000001100  | Dalteparin sodium |
| Dalteparin sodium 10,000units/1ml solution for injection ampoules                  | 404041000033110  | 36092911000001101 | Dalteparin sodium |
| Fragmin 10,000units/1ml solution for injection pre-filled syringes (Pfizer Ltd)    | 1781641000033114 | 3970311000001105  | Dalteparin sodium |
| Dalteparin sodium 10,000units/1ml solution for injection pre-filled syringes       | 1781541000033113 | 36093011000001109 | Dalteparin sodium |
| Fragmin 10,000units/4ml solution for injection ampoules (Pfizer Ltd)               | 611141000033113  | 3969411000001100  | Dalteparin sodium |
| Dalteparin sodium 10,000units/4ml solution for injection ampoules                  | 404241000033119  | 36093111000001105 | Dalteparin sodium |
| Fragmin 100,000units/4ml solution for injection vials (Pfizer Ltd)                 | 1822041000033115 | 3970611000001100  | Dalteparin sodium |
| Dalteparin sodium 100,000units/4ml solution for injection vials                    | 1821941000033114 | 36093311000001107 | Dalteparin sodium |
| Fragmin 12,500units/0.5ml solution for injection pre-filled syringes (Pfizer Ltd)  | 1731141000033112 | 3838711000001100  | Dalteparin sodium |
| Dalteparin sodium 12,500units/0.5ml solution for injection pre-filled syringes     | 1726841000033111 | 36563811000001103 | Dalteparin sodium |
| Fragmin 15,000units/0.6ml solution for injection pre-filled syringes (Pfizer Ltd)  | 1731241000033117 | 3968311000001101  | Dalteparin sodium |
| Dalteparin sodium 15,000units/0.6ml solution for injection pre-filled syringes     | 1726941000033115 | 36564211000001101 | Dalteparin sodium |
| Fragmin 5,000units/0.2ml solution for injection pre-filled syringes (Pfizer Ltd)   | 611241000033118  | 3723611000001103  | Dalteparin sodium |
| Dalteparin sodium 5,000units/0.2ml solution for injection pre-filled syringes      | 404341000033112  | 36566011000001101 | Dalteparin sodium |
| Fragmin 10,000units/0.4ml solution for injection pre-filled syringes (Pfizer Ltd)  | 1731041000033113 | 3967611000001107  | Dalteparin sodium |
| Dalteparin sodium 10,000units/0.4ml solution for injection pre-filled syringes     | 1726741000033118 | 37084311000001106 | Dalteparin sodium |
| Fragmin 18,000units/0.72ml solution for injection pre-filled syringes (Pfizer Ltd) | 1731341000033110 | 3968611000001106  | Dalteparin sodium |
| Dalteparin sodium 18,000units/0.72ml solution for injection pre-filled syringes    | 1727041000033119 | 37084411000001104 | Dalteparin sodium |
| Fragmin 2,500units/0.2ml solution for injection pre-filled syringes (Pfizer Ltd)   | 611041000033114  | 3840411000001109  | Dalteparin sodium |
| Dalteparin sodium 2,500units/0.2ml solution for injection pre-filled syringes      | 404141000033114  | 37084511000001100 | Dalteparin sodium |

**Table S4. Stroke Aurum codes**

| Term                                               | MedCode ID        | SNOMED CT Concept ID | SNOMED CT Description ID |
|----------------------------------------------------|-------------------|----------------------|--------------------------|
| Cerebral haemorrhage                               | 884421000006119   | 274100004            | 884421000006119          |
| External capsule haemorrhage                       | 300276019         | 195167002            | 300276019                |
| Basilar artery occlusion                           | 300303013         | 195180004            | 300303013                |
| Cerebral infarction due to thrombosis of cerebral  | 300321011         | 195189003            | 300321011                |
| Anterior cerebral artery syndrome                  | 300363010         | 195210002            | 300363010                |
| Occlusion and stenosis of anterior cerebral artery | 300396012         | 195233001            | 300396012                |
| Occlusion and stenosis of posterior cerebral arter | 300398013         | 195234007            | 300398013                |
| Occlusion and stenosis of cerebellar arteries      | 300399017         | 195235008            | 300399017                |
| Right sided cerebral infarction                    | 451134017         | 307767006            | 451134017                |
| H/O: Stroke in last year                           | 451371010         | 308067002            | 451371010                |
| Basal ganglion stroke                              | 6837051000006119  | 413102000            | 2966612019               |
| Subarachnoid haemorrhage from middle cerebral arte | 123511000006114   | 21454007             | 36011016                 |
| Subarachnoid haemorrhage from posterior communicat | 123521000006118   | 21454007             | 36011016                 |
| Left sided intracerebral haemorrhage, unspecified  | 748941000006115   | 274100004            | 409859018                |
| Cerebrl infarctn due/unspcf occlusn or sten/cerebr | 543141000006110   | 20059004             | 33759015                 |
| Internal capsule haemorrhage                       | 496232015         | 52201006             | 496232015                |
| Stroke due to cerebral arterial occlusion          | 122361000006113   | 230691006            | 345638019                |
| Subarachnoid haemorrhage from basilar artery       | 123491000006115   | 276284000            | 412361011                |
| [V]Personal history of transient ischaemic attack  | 1667741000000110  | 751371000000107      | 1667741000000110         |
| Cerebral haemorrhage                               | 989201000006117   | 274100004            | 989201000006117          |
| Lobar cerebral haemorrhage                         | 345675012         | 230710000            | 345675012                |
| Cerebral A. occlusion NOS                          | 884501000006113   | 682621000000105      | 884501000006113          |
| Subdural haemorrhage                               | 884441000006114   | 195176009            | 884441000006114          |
| Lateral medullary syndrome                         | 130375018         | 78569004             | 130375018                |
| [RFC] Stroke                                       | 907591000006116   | 907591000006100      | 907591000006116          |
| [RFC] Stroke                                       | 908801000006114   | 908801000006105      | 908801000006114          |
| Right sided intracerebral haemorrhage, unspecified | 163261000006119   | 195168007            | 300277011                |
| Subarachnoid haemorrh from intracranial artery, un | 123441000006112   | 21454007             | 481028017                |
| [X]Other intracerebral haemorrhage                 | 11919571000006110 | 274100004            | 11919571000006110        |
| Infarction of basal ganglia                        | 2474651019        | 413102000            | 2474651019               |
| [V]Personal history of stroke                      | 1227591017        | 275526006            | 2476091017               |
| Basilar artery occluded                            | 884461000006113   | 195180004            | 884461000006113          |
| H/O: CVA/stroke                                    | 809421000006116   | 275526006            | 2986886017               |
| Intracerebral haemorrhage NOS                      | 300287010         | 274100004            | 2819959010               |
| Cerebral thrombosis                                | 118689010         | 71444005             | 118689010                |
| H/O: CVA                                           | 411518010         | 275526006            | 411518010                |
| Left sided cerebral infarction                     | 451133011         | 307766002            | 451133011                |
| Brain stem stroke                                  | 4057041000006110  | 95457000             | 2966556014               |
| Lacunar stroke                                     | 5011161000006115  | 230698000            | 345652017                |

|                                                    |                   |                 |                   |
|----------------------------------------------------|-------------------|-----------------|-------------------|
| Cereb infarct due unsp occlus/stenos precerebr art | 542261000006114   | 125081000119106 | 3042974014        |
| [X]Other transnt cerebral ischaemic attacks+relate | 416991000006112   | 266257000       | 395788015         |
| Stroke due to intracerebral haemorrhage            | 11903571000006110 | 274100004       | 11903571000006110 |
| Subdural haematoma - nontraumatic                  | 2475119012        | 195176009       | 2469010019        |
| Stroke due to intracerebral haemorrhage            | 122371000006118   | 274100004       | 409860011         |
| [X]Other subarachnoid haemorrhage                  | 300936018         | 21454007        | 481028017         |
| Carotid territory transient ischaemic attack       | 345684012         | 230716006       | 345684012         |
| Cerebral amyloid angiopathy                        | 345701012         | 230724001       | 345701012         |
| Subarachnoid haemorrhage from basilar artery aneur | 5583101000006116  | 276284000       | 412361011         |
| Posterior cerebral artery syndrome                 | 300364016         | 195211003       | 300364016         |
| Sequelae of intracerebral haemorrhage              | 300407010         | 195241001       | 300407010         |
| Brainstem infarction                               | 524541000006117   | 95457000        | 158113017         |
| Cereb infarct due cerebral venous thrombosis, nonp | 542251000006112   | 195230003       | 300393016         |
| Cerebral haemorrhage NOS                           | 989211000006119   | 274100004       | 989211000006119   |
| Stroke and cerebrovascular accident unspecified    | 12727691000006117 | 685631000000102 | 1501361000000113  |
| Intracerebral haemorrhage                          | 744901000006114   | 274100004       | 2819959010        |
| Cortical haemorrhage                               | 495394013         | 49422009        | 495394013         |
| Cerebellar haemorrhage                             | 502878012         | 75038005        | 502878012         |
| Bulbar haemorrhage                                 | 483988011         | 732923001       | 3467313018        |
| CVA - cerebral artery occlusion                    | 605461000006117   | 230691006       | 345638019         |
| CVA - Cerebrovascular accident unspecified         | 605491000006113   | 230690007       | 345635016         |
| Extradural haemorrhage - nontraumatic              | 660111000006117   | 397809001       | 1773153015        |
| Subarachnoid haemorrhage from anterior communicati | 123481000006118   | 21454007        | 36011016          |
| Stroke                                             | 884531000006117   | 685631000000102 | 884531000006117   |
| Ruptured berry aneurysm                            | 300242011         | 195154000       | 300242011         |
| Subarachnoid haemorrhage from carotid siphon and b | 300244012         | 195155004       | 300244012         |
| Subarachnoid haemorrhage from vertebral artery     | 300253017         | 195160000       | 300253017         |
| Subdural haemorrhage - nontraumatic                | 300294013         | 195176009       | 300294013         |
| Cerebral infarction due to embolism of precerebral | 300313017         | 195186005       | 300313017         |
| Sequelae of subarachnoid haemorrhage               | 300406018         | 195240000       | 300406018         |
| Sequelae of cerebral infarction                    | 300411016         | 195243003       | 300411016         |
| [X]Cereb infarct due unsp occlus/stenos precerebr  | 370661000006114   | 125081000119106 | 3042974014        |
| Cerebral infarction due to embolism of cerebral ar | 300322016         | 195190007       | 300322016         |
| Cerebral embolus                                   | 542831000006116   | 75543006        | 125470015         |
| [X]Other cerebral infarction                       | 300941014         | 432504007       | 2770034014        |
| Intracerebral haemorrhage in hemisphere, unspecifi | 744921000006116   | 274100004       | 409860011         |
| Intracerebral haemorrhage, multiple localized      | 746571000006116   | 195169004       | 300280012         |
| [X]Occlusion and stenosis of other cerebral arteri | 300943012         | 20059004        | 33759015          |
| [X]Other intracerebral haemorrhage                 | 300939013         | 274100004       | 409860011         |
| Cerebral haemorrhage NOS                           | 884451000006111   | 700251000000105 | 884451000006111   |
| CVA unspecified                                    | 605501000006117   | 230690007       | 345637012         |

|                                                    |                   |                 |                  |
|----------------------------------------------------|-------------------|-----------------|------------------|
| [X]Subarachnoid haemorrh from intracranial artery, | 428181000006115   | 21454007        | 481028017        |
| Sequelae of other nontraumatic intracranial haemor | 149551000006111   | 363302008       | 482447013        |
| Sequelae of stroke,not specfd as h'morrhage or inf | 149571000006118   | 195239002       | 300403014        |
| Infarction - cerebral                              | 218511000000117   | 432504007       | 2770034014       |
| Cerebral infarction NOS                            | 12727431000006119 | 682621000000105 | 1495311000000117 |
| Basal nucleus haemorrhage                          | 503791000006114   | 195165005       | 300272017        |
| Stroke/CVA - undefined                             | 884521000006115   | 685631000000102 | 884521000006115  |
| [X]Cerebrl infarctn due/unspcf occlusn or sten/cer | 370701000006118   | 20059004        | 33759015         |
| History of stroke in last year                     | 5974521000006116  | 308067002       | 2986393012       |
| [RFC] Stroke/CVA                                   | 907581000006119   | 907581000006103 | 907581000006119  |
| Brainstem infarction NOS                           | 345650013         | 95457000        | 158113017        |
| Intracerebral haemorrhage, intraventricular        | 300277011         | 195168007       | 300277011        |
| Cerebral infarct due to thrombosis of precerebral  | 300312010         | 195185009       | 300312010        |
| Middle cerebral artery syndrome                    | 300362017         | 195209007       | 300362017        |
| Right sided CVA                                    | 300371014         | 195217004       | 300371014        |
| Intracranial haemorrhage NOS                       | 300298011         | 1386000         | 475553012        |
| Subarachnoid haemorrhage NOS                       | 300257016         | 21454007        | 481028017        |
| [V]Personal history of cerebrovascular accident (C | 1227592012        | 266995000       | 397829016        |
| Right sided intracerebral haemorrhage, unspecified | 12722481000006116 | 308128006       | 451441015        |
| Subarachnoid haemorrhage                           | 481028017         | 21454007        | 481028017        |
| [X]Intracerebral haemorrhage in hemisphere, unspc  | 300956017         | 274100004       | 409860011        |
| Pontine haemorrhage                                | 503469016         | 7713009         | 503469016        |
| H/O: stroke                                        | 2476091017        | 275526006       | 2476091017       |
| Cerebellar infarction                              | 158118014         | 95460007        | 158118014        |
| Intracranial subarachnoid haemorrhage from vertebr | 4777761000006112  | 195160000       | 2916525016       |
| Stroke and cerebrovascular accident unspecified    | 405339016         | 230690007       | 345637012        |
| Wallenberg syndrome                                | 57341000006119    | 78569004        | 130374019        |
| Other and unspecified intracranial haemorrhage     | 300290016         | 62914000        | 104563015        |
| CVA - cerebrovascular accid due to intracerebral h | 605471000006112   | 274100004       | 409859018        |
| Stroke                                             | 5010981000006119  | 230690007       | 345636015        |
| CT - Cerebral thrombosis                           | 3662331000006119  | 71444005        | 1233388010       |
| Occlusive stroke                                   | 1212072018        | 373606000       | 1212072018       |
| Cerebral arterial occlusion                        | 1222398015        | 20059004        | 1222398015       |
| H/O: TIA                                           | 251692018         | 161511000       | 251692018        |
| Cerebral infarction NOS                            | 395780010         | 432504007       | 2770034014       |
| Stroke unspecified                                 | 122401000006115   | 230690007       | 345637012        |
| Cerebral embolism                                  | 125470015         | 75543006        | 125470015        |
| Left sided CVA                                     | 300370010         | 195216008       | 300370010        |
| Occlusion and stenosis of middle cerebral artery   | 300395011         | 195232006       | 300395011        |
| [X]Subarachnoid haemorrhage from other intracrania | 300935019         | 21454007        | 36011016         |

**Table S5. Transient ischaemic attack selection Aurum codes**

| Term                                              | Medcode ID        | SNOMED CT<br>Concept ID | SNOMED CT<br>Description ID |
|---------------------------------------------------|-------------------|-------------------------|-----------------------------|
| Anterior circulation transient ischaemic attack   | 5011491000006115  | 230716006               | 345683018                   |
| Transient cerebral ischemia                       | 11920121000006117 | 266257000               | 395785017                   |
| Personal history of transient ischaemic attack    | 8231151000006110  | 751371000000107         | 1653121000000119            |
| [V]Personal history of transient ischaemic attack | 1667741000000110  | 751371000000107         | 1667741000000110            |
| Transient ischaemic attack                        | 395783012         | 266257000               | 395783012                   |
| Transient cerebral ischaemia                      | 395788015         | 266257000               | 395788015                   |
| Carotid territory transient ischaemic attack      | 345684012         | 230716006               | 345684012                   |
| Transient Ischaemic Attacks                       | 884511000006111   | 584181000000100         | 884511000006111             |
| H/O: TIA                                          | 251692018         | 161511000               | 251692018                   |
| Transient Ischaemic Attacks                       | 988951000006117   | 266257000               | 988951000006117             |
| TIA - Transient ischaemic attack                  | 5492201000006111  | 266257000               | 395784018                   |

**Table S6. Arterial thromboembolism Auum codes**

| Term                                                       | MedCode ID        | SNOMED CT Concept ID | SNOMED CT Description ID |
|------------------------------------------------------------|-------------------|----------------------|--------------------------|
| Embolism and/or thrombosis of the internal iliac artery    | 300554012         | 734298005            | 3503835018               |
| Cerebral infarction due to thrombosis of cerebral arteries | 300321011         | 195189003            | 300321011                |
| Embolism and thrombosis of the brachial artery             | 300535012         | 195319003            | 300535012                |
| Embolism and thrombosis of the posterior tibial artery     | 300543019         | 195327007            | 300543019                |
| Recurrent pulmonary embolism                               | 632111000000118   | 438773007            | 2793990014               |
| Embolism and thrombosis of the celiac artery               | 4778981000006116  | 195342005            | 300560012                |
| Superior mesenteric artery embolus                         | 4785631000006110  | 196999001            | 302978019                |
| Cerebral arterial thrombosis                               | 3662321000006117  | 71444005             | 118691019                |
| Saddle embolus of abdominal aorta                          | 5058281000006118  | 233972005            | 350565011                |
| Peripheral arterial embolism                               | 884661000006110   | 583731000000103      | 884661000006110          |
| Embolus/thrombus artery NOS                                | 884671000006115   | 583761000000108      | 884671000006115          |
| Arterial embolism and thrombosis NOS                       | 12733161000006111 | 583761000000108      | 1295451000000114         |
| Thrombosis - coronary                                      | 1786198013        | 398274000            | 1786198013               |
| Thrombosis of cerebral arteries                            | 3662311000006113  | 71444005             | 118690018                |
| Cerebral arterial embolism                                 | 3728451000006116  | 75543006             | 125471016                |
| Renal artery thrombosis                                    | 158317012         | 95579008             | 158317012                |
| Embolism and thrombosis of other specified artery          | 300552011         | 266262004            | 395794011                |
| Arterial embolism and thrombosis NOS                       | 300564015         | 266262004            | 395794011                |
| Aortic bifurcation embolus                                 | 5058291000006115  | 233972005            | 350566012                |
| Embolism and thrombosis of a leg artery NOS                | 300547018         | 195318006            | 300534011                |
| Peripheral arterial embolism and thrombosis NOS            | 300550015         | 195318006            | 300534011                |
| Renal artery embolism                                      | 158318019         | 95580006             | 158318019                |
| Thromboembolus of internal iliac artery                    | 3503835018        | 734298005            | 3503835018               |
| SMAE - Superior mesenteric artery embolus                  | 4785641000006117  | 196999001            | 302979010                |
| Renal artery stent thrombosis                              | 1848121000006110  | 840961000000108      | 2182101000000113         |
| Thrombosis, carotid artery                                 | 100771000006112   | 86003009             | 142588012                |
| Embolism and thrombosis of an arm artery NOS               | 300538014         | 195318006            | 300534011                |
| Saddle embolus                                             | 350563016         | 233972005            | 350563016                |
| Embolism and/or thrombosis of the external iliac artery    | 300555013         | 734299002            | 3503839012               |
| Embolism and thrombosis of an arm or leg artery            | 300534011         | 195318006            | 300534011                |
| Embolism and/or thrombosis of the common iliac artery      | 300553018         | 195335005            | 300553018                |
| Embolism and thrombosis of the splenic artery              | 300558010         | 195340002            | 300558010                |
| Embolus/thrombosis abd. aorta                              | 884641000006111   | 266263009            | 884641000006111          |
| Embolus/thrombosis aorta NOS                               | 884651000006113   | 195317001            | 884651000006113          |
| Embolism and thrombosis of other and unspec parts aorta    | 638871000006114   | 274101000            | 409861010                |
| Embolus of the superior mesenteric artery                  | 639241000006110   | 196999001            | 302978019                |
| Arterial embolus and thrombosis                            | 395795012         | 266262004            | 395795012                |

|                                                             |                   |                  |                  |
|-------------------------------------------------------------|-------------------|------------------|------------------|
| Embolism and thrombosis of the iliac artery unspecified     | 300556014         | 266262004        | 395794011        |
| [X]Embolism and thrombosis of other arteries                | 300964011         | 266262004        | 395794011        |
| Cerebral infarction due to embolism of precerebral arteries | 300313017         | 195186005        | 300313017        |
| Embolism and thrombosis of the anterior tibial artery       | 300541017         | 195325004        | 300541017        |
| Embolism and thrombosis of the axillary artery              | 300559019         | 195341003        | 300559019        |
| Incomplete spontaneous abortion with embolism               | 305331019         | 198650006        | 305331019        |
| Embolism and thrombosis of other arteries NOS               | 300563014         | 266262004        | 395794011        |
| Cerebral infarction due to embolism of cerebral arteries    | 300322016         | 195190007        | 300322016        |
| Embolism and thrombosis of the radial artery                | 300536013         | 195320009        | 300536013        |
| Embolism and thrombosis of the coeliac artery               | 300561011         | 195342005        | 300561011        |
| Arterial embolism/thrombosis                                | 884631000006118   | 266262004        | 884631000006118  |
| Peripheral arterial embolism and thrombosis NOS             | 12733151000006114 | 583731000000103  | 1295391000000110 |
| Thrombosis of renal artery                                  | 4059051000006119  | 95579008         | 158316015        |
| Aortic thromboembolism                                      | 5560171000006116  | 274101000        | 409861010        |
| Embolism and thrombosis of the abdominal aorta              | 395796013         | 266263009        | 395796013        |
| Other embolism and thrombosis                               | 300712012         | 429098002        | 2692478010       |
| Thrombosis of artery of transplanted kidney                 | 2234541000000115  | 864271000000105  | 2234541000000115 |
| Chronic thromboembolic pulmonary hypertension               | 5057801000006113  | 233947005        | 2968345015       |
| Thromboembolic pulmonary hypertension                       | 350517010         | 233947005        | 350517010        |
| [V] Personal history of pulmonary embolism                  | 451479013         | 161512007        | 251693011        |
| Cerebral infarct due to thrombosis of precerebral arteries  | 300312010         | 195185009        | 300312010        |
| Embolism and thrombosis of the thoracic aorta               | 300533017         | 195317001        | 300533017        |
| Embolism and thrombosis of the ulnar artery                 | 300537016         | 195321008        | 300537016        |
| Embolism and thrombosis of the popliteal artery             | 300540016         | 195324000        | 300540016        |
| Pulmonary embolism                                          | 98484016          | 59282003         | 98484016         |
| Embolism and thrombosis of the hepatic artery               | 300562016         | 195343000        | 3491726018       |
| Embolism and thrombosis NOS                                 | 300713019         | 429098002        | 2692478010       |
| Anterior spinal artery thrombosis                           | 345723011         | 230740003        | 345723011        |
| Embolism and thrombosis of hepatic artery                   | 4778991000006118  | 195343000        | 3491726018       |
| Arteriovenous fistula thrombosis                            | 350892013         | 234205007        | 350892013        |
| Renal artery stent thrombosis                               | 1809151000006116  | 1809151000006100 | 1809151000006116 |
| Thrombus of the superior mesenteric artery                  | 100811000006112   | 197000003        | 302980013        |
| Thromboembolus of external iliac artery                     | 3503839012        | 734299002        | 3503839012       |
| Embolism and thrombosis NOS                                 | 638821000006113   | 429098002        | 2692478010       |
| Thrombosis - arterial                                       | 218541000000116   | 65198009         | 108347015        |
| Arterial embolism and thrombosis                            | 491241000006118   | 266262004        | 395795012        |
| PE - Pulmonary embolism                                     | 3462921000006119  | 59282003         | 1231937012       |
| Renal artery embolus                                        | 1235925019        | 95580006         | 1235925019       |
| [RFC] Arterial embolism of limbs                            | 905541000006119   | 905541000006103  | 905541000006119  |
| Arterial embolic and thrombotic occlusion                   | 395794011         | 266262004        | 395794011        |

|                                                      |                  |                  |                  |
|------------------------------------------------------|------------------|------------------|------------------|
| Embolism and thrombosis of the femoral artery        | 300539018        | 195323006        | 300539018        |
| Embolism and thrombosis of the dorsalis pedis artery | 300542012        | 195326003        | 300542012        |
| Embolism and thrombosis of the subclavian artery     | 300557017        | 195339004        | 300557017        |
| Thromboembolic pulmonary hypertension                | 1749291000006113 | 1749291000006109 | 1749291000006113 |



**Table S7. Myocardial infarction AURUM codes**

| Term                                                                | Medcode ID        | SNOMED CT Concept ID | SNOMED CT Description ID |
|---------------------------------------------------------------------|-------------------|----------------------|--------------------------|
| Acute anteroapical infarction                                       | 299708014         | 52035003             | 3038718019               |
| Subsequent myocardial infarction of inferior wall                   | 299812011         | 194858006            | 299812011                |
| Acute Q-wave infarct                                                | 447324018         | 304914007            | 447324018                |
| Acute transmural myocardial infarction of unspecified site          | 460681000006116   | 57054005             | 94884017                 |
| Postmyocardial infarction syndrome                                  | 3576371000006117  | 66189004             | 109915012                |
| Acute non-Q wave infarction                                         | 450322013         | 307140009            | 450322013                |
| Myocardial infarct                                                  | 2855351000006111  | 22298006             | 1784873012               |
| Acute myocardial infarction of inferolateral wall                   | 3565871000006113  | 65547006             | 108912018                |
| Acute inferior myocardial infarction                                | 3699921000006110  | 73795002             | 1233665015               |
| Subsequent myocardial infarction of unspecified site                | 118831000006118   | 194856005            | 299808017                |
| Postoperative transmural myocardial infarction other sites          | 212081000006112   | 129574000            | 208365015                |
| Postoperative transmural myocardial infarction unspecified site     | 212091000006110   | 129574000            | 208365015                |
| Acute myocardial infarction of atrium                               | 4775891000006119  | 194809007            | 2470032018               |
| Acute myocardial infarction of septum                               | 3784911000006111  | 79009004             | 131106018                |
| Other acute myocardial infarction NOS                               | 299720018         | 57054005             | 94884017                 |
| History of myocardial infarction in last year                       | 5974481000006116  | 308065005            | 2986726013               |
| Acute papillary muscle infarction                                   | 1218860015        | 10273003             | 1218860015               |
| Acute myocardial infarction of anterolateral wall                   | 3641641000006116  | 70211005             | 116613011                |
| Personal history of myocardial infarction                           | 230021000006115   | 399211009            | 2986492018               |
| Acute Q wave myocardial infarction                                  | 5935321000006111  | 304914007            | 447323012                |
| Silent myocardial infarction                                        | 350376014         | 233843008            | 350376014                |
| Acute ST segment elevation myocardial infarction                    | 1780491019        | 401303003            | 1780491019               |
| MI - Myocardial infarction                                          | 2855341000006114  | 22298006             | 1784872019               |
| History of myocardial infarction                                    | 1738171000006114  | 399211009            | 2986492018               |
| Pericarditis following myocardial infarction                        | 5056951000006117  | 233885007            | 350432018                |
| Postoperative myocardial infarction                                 | 208365015         | 129574000            | 208365015                |
| MI - Silent myocardial infarction                                   | 5056461000006113  | 233843008            | 350377017                |
| Acute myocardial infarction of septum alone                         | 3784921000006115  | 79009004             | 131107010                |
| Acute posterolateral myocardial infarction                          | 967931000006114   | 15990001             | 27071012                 |
| Previous myocardial infarction                                      | 6619201000006117  | 399211009            | 545891000000115          |
| Acute myocardial infarction of lateral wall                         | 3452181000006112  | 58612006             | 97399018                 |
| Myocardial infarction with complication                             | 6348651000006112  | 371068009            | 6348651000006112         |
| Lateral myocardial infarction NOS                                   | 299711010         | 58612006             | 1231860015               |
| Hemopericardium due to and following acute myocardial infarction    | 12220751000006113 | 194862000            | 3673281015               |
| Ventricular septal defect/curr comp fol acute myocardial infarction | 67081000006119    | 233846000            | 350381017                |
| Postmyocardial infarction syndrome                                  | 109915012         | 66189004             | 500341014                |
| AMI - Acute myocardial infarction                                   | 3427201000006111  | 57054005             | 1231678011               |

|                                                                               |                   |                 |                 |
|-------------------------------------------------------------------------------|-------------------|-----------------|-----------------|
| Postoperative transmural myocardial infarction inferior wall                  | 212071000006114   | 311793000       | 455419012       |
| Other specified anterior myocardial infarction                                | 299707016         | 54329005        | 1231324017      |
| Posterior myocardial infarction NOS                                           | 299710011         | 233838001       | 350371016       |
| Other acute myocardial infarction                                             | 299718016         | 57054005        | 94884017        |
| Acute myocardial infarction of anterior wall                                  | 3381601000006117  | 54329005        | 90302019        |
| Anterior myocardial infarction NOS                                            | 299709018         | 54329005        | 1231324017      |
| Past history of myocardial infarction                                         | 6619191000006115  | 399211009       | 1786753012      |
| True posterior myocardial infarction                                          | 299712015         | 194802003       | 299712015       |
| Subsequent myocardial infarction of anterior wall                             | 299811016         | 194857001       | 299811016       |
| Acute inferolateral infarction                                                | 457531000006110   | 65547006        | 1232697013      |
| Acute myocardial infarction of inferoposterior wall                           | 3745741000006117  | 76593002        | 127193015       |
| [RFC] Myocardial infarction (MI)                                              | 905351000006113   | 905351000006109 | 905351000006113 |
| Cardiac rupture following myocardial infarction (MI)                          | 537751000006115   | 233847009       | 350383019       |
| Old myocardial infarction                                                     | 4031011           | 1755008         | 4031011         |
| Subsequent myocardial infarction                                              | 299808017         | 194856005       | 299808017       |
| Acute anteroseptal infarction                                                 | 455651000006114   | 62695002        | 104192010       |
| [X]Acute transmural myocardial infarction of unspecif site                    | 362461000006119   | 57054005        | 94884017        |
| First myocardial infarction                                                   | 932081000006118   | 932081000006102 | 932081000006118 |
| STEMI - ST elevation myocardial infarction                                    | 6651221000006117  | 401303003       | 2840840013      |
| Postoperative subendocardial myocardial infarction                            | 455422014         | 311796008       | 455422014       |
| Acute anterolateral infarction                                                | 455641000006112   | 70211005        | 1233238016      |
| [X]Subsequent myocardial infarction of unspecified site                       | 300882013         | 194856005       | 299808017       |
| Postoperative myocardial infarction, unspecified                              | 455423016         | 129574000       | 208365015       |
| Acute myocardial infarction of diaphragmatic wall                             | 3699911000006119  | 73795002        | 122559017       |
| Acute subendocardial infarction                                               | 116992017         | 70422006        | 116992017       |
| Inferior myocardial infarction NOS                                            | 299714019         | 73795002        | 122557015       |
| Acute myocardial infarction NOS                                               | 299721019         | 57054005        | 94884017        |
| Subsequent myocardial infarction of other sites                               | 299813018         | 194856005       | 299808017       |
| Cardiac rupture due to and following acute myocardial infarction              | 12221301000006119 | 233847009       | 3673284011      |
| Hemopericardium as current complication following acute myocardial infarction | 4776221000006110  | 194862000       | 299817017       |
| Acute septal infarction                                                       | 1234306015        | 79009004        | 1234306015      |
| Acute non-ST segment elevation myocardial infarction                          | 1780501013        | 401314000       | 1780501013      |
| History of myocardial infarct at age greater than sixty                       | 4540481000006111  | 161503005       | 2986493011      |
| Postoperative transmural myocardial infarction anterior wall                  | 212061000006119   | 311792005       | 455418016       |
| Acute anteroapical myocardial infarction                                      | 3343471000006116  | 52035003        | 86618010        |
| [X]Subsequent myocardial infarction of other sites                            | 300881018         | 194856005       | 299808017       |
| Postmyocardial infarction pericarditis                                        | 3576391000006116  | 66189004        | 109917016       |
| History of myocardial infarct at age less than sixty                          | 4540461000006118  | 161502000       | 2986996013      |
| Acute inferoposterior infarction                                              | 1234005010        | 76593002        | 1234005010      |

|                                  |                  |          |                 |
|----------------------------------|------------------|----------|-----------------|
| Myocardial Infarction            | 884151000006119  | 57054005 | 884151000006119 |
| MI - acute myocardial infarction | 219531000000117  | 57054005 | 94884017        |
| Acute myocardial infarction      | 94884017         | 57054005 | 94884017        |
| Myocardial infarction            | 2855301000006112 | 22298006 | 37436014        |

**Table S8. Periphera l arterial disease Aurum codes**

| Term                                            | Medcode ID        | SNOMED CT<br>Concept ID | SNOMED CT<br>Description ID |
|-------------------------------------------------|-------------------|-------------------------|-----------------------------|
| Ischaemic foot                                  | 443199013         | 301755001               | 443199013                   |
| Peripheral angiopathic disease EC NOS           | 300511019         | 400047006               | 1779317016                  |
| Other specified peripheral vascular disease NOS | 300514010         | 400047006               | 1779317016                  |
| Peripheral vascular disease NOS                 | 300515011         | 400047006               | 1779317016                  |
| Peripheral arterial disease confirmed           | 1823971000006118  | 1823971000006102        | 1823971000006118            |
| Peripheral ischaemic vascular disease           | 350535018         | 233958001               | 350535018                   |
| Ischaemic foot                                  | 1699111000006110  | 1699111000006106        | 1699111000006110            |
| Other specified peripheral vascular disease     | 300510018         | 400047006               | 1779317016                  |
| Peripheral vascular disease NOS                 | 235911000006116   | 400047006               | 1779317016                  |
| Ischaemia of legs                               | 742481000006118   | 233961000               | 350546015                   |
| Other peripheral vascular disease               | 395791015         | 400047006               | 1779317016                  |
| [X]Other specified peripheral vascular diseases | 300963017         | 400047006               | 1779317016                  |
| Peripheral ischaemia                            | 350533013         | 233958001               | 350533013                   |
| Peripheral vascular disease NOS                 | 12729241000006119 | 646351000000103         | 1422221000000115            |
| Peripheral arterial disease                     | 1847121000006114  | 399957001               | 1787050010                  |
| Aortic atherosclerosis                          | 218531000000113   | 81817003                | 135728018                   |

**Table S9. Aortic plaque Aurum codes**

| Term                       | MedCode ID       | SNOMED CT<br>Concept ID | SNOMED CT<br>Description ID |
|----------------------------|------------------|-------------------------|-----------------------------|
| Atherosclerosis aorta      | 3830431000006112 | 81817003                | 2923328010                  |
| Aortic thromboembolism     | 5560171000006116 | 274101000               | 409861010                   |
| Aortoiliac atherosclerosis | 5057931000006110 | 233956002               | 350530011                   |
| Aortic atherosclerosis     | 218531000000113  | 81817003                | 135728018                   |

**Table S10. Diabetes Aurum codes**

| Term                                                             | Medcode ID        | SNOMED CT<br>Concept ID | SNOMED CT<br>Description ID |
|------------------------------------------------------------------|-------------------|-------------------------|-----------------------------|
| Pre-existing type 2 diabetes mellitus in pregnancy               | 11931861000006112 | 237627000               | 1988741000006117            |
| Unstable type I diabetes mellitus                                | 429970018         | 290002008               | 429970018                   |
| Diabetes mellitus with ketoacidosis                              | 2622193012        | 420422005               | 2622193012                  |
| Lipoatrophic diabetes mellitus                                   | 5687751000006119  | 284449005               | 1495355018                  |
| Other specified diabetes mellitus with multiple comps            | 13751000006117    | 385041000000108         | 760111000000115             |
| Other specified diabetes mellitus with periph circ comps         | 13791000006111    | 421895002               | 2618203015                  |
| Unstable type 1 diabetes mellitus                                | 72711000006117    | 290002008               | 429971019                   |
| Type 1 diabetes mellitus - poor control                          | 84291000006117    | 444073006               | 2872487013                  |
| Type 1 diabetes mellitus with nephropathy                        | 84371000006110    | 421893009               | 2623054013                  |
| Type 1 diabetes mellitus with polyneuropathy                     | 84421000006115    | 713705003               | 3297342019                  |
| Type 1 diabetes mellitus with ulcer                              | 84451000006112    | 190368000               | 292540012                   |
| Type 2 diabetes mellitus - poor control                          | 84481000006116    | 443694000               | 2921019012                  |
| Type 2 diabetes mellitus with arthropathy                        | 84491000006118    | 314903002               | 459310018                   |
| Type 2 diabetes mellitus with neuropathic arthropathy            | 84571000006115    | 314904008               | 459313016                   |
| Type 2 diabetes mellitus with peripheral angiopathy              | 84591000006119    | 314902007               | 459308015                   |
| Type 2 diabetes mellitus with polyneuropathy                     | 84601000006110    | 713706002               | 3297353013                  |
| Type I diabetes mellitus with arthropathy                        | 84681000006118    | 314893005               | 459294012                   |
| Type I diabetes mellitus with hypoglycaemic coma                 | 84711000006117    | 314771006               | 459163017                   |
| Type I diabetes mellitus with ulcer                              | 84821000006118    | 190368000               | 292538019                   |
| Type II diabetes mellitus with polyneuropathy                    | 84971000006111    | 713706002               | 3297353013                  |
| Type II diabetes mellitus with renal complications               | 84981000006114    | 420279001               | 3013392012                  |
| Insulin dependent diabetes mellitus with arthropathy             | 6051171000006117  | 314893005               | 459293018                   |
| Insulin-dependent diabetes mellitus secretory diarrhea syndrome  | 5109851000006119  | 237618001               | 356116016                   |
| Type I diabetes mellitus without complication                    | 457325013         | 313435000               | 457325013                   |
| Non-insulin-dependent diabetes mellitus without complication     | 457328010         | 313436004               | 457328010                   |
| MODY - Maturity onset diabetes glucokinase-related               | 5109621000006112  | 237604008               | 356087019                   |
| DKA - diabetic ketoacidosis                                      | 6953901000006115  | 420422005               | 3303994013                  |
| Maturity onset diabetes of the young type 5                      | 1968641000006114  | 609572000               | 2967853015                  |
| Diabetes mellitus, juvenile type, + unspecified complication     | 616611000006111   | 420868002               | 3013528019                  |
| Pre-existing diabetes mellitus in mother complicating childbirth | 8033291000006116  | 106281000119103         | 3005790010                  |
| ADM - atypical diabetes mellitus                                 | 11633221000006116 | 530558861000132104      | 3334355014                  |
| Type I diabetes mellitus with hypoglycemic coma                  | 6050061000006116  | 314771006               | 459164011                   |
| Type I diabetes mellitus with multiple complications             | 84361000006115    | 422228004               | 2618232017                  |
| Type I diabetes mellitus with neurological complications         | 84751000006116    | 421468001               | 3695401013                  |
| Non-insulin dependent diabetes mellitus with mononeuropathy      | 280521000006117   | 420436000               | 3697667019                  |

|                                                              |                   |                 |                 |
|--------------------------------------------------------------|-------------------|-----------------|-----------------|
| Non-insulin-dependent diabetes mellitus with ophthalm comps  | 587111000006111   | 422099009       | 3698440016      |
| Diabetes mellitus, adult onset, with renal manifestation     | 616551000006111   | 420279001       | 2615535015      |
| Diabetes mellitus, adult with gangrene                       | 616561000006113   | 421631007       | 2618206011      |
| Diabetes mellitus, juvenile +peripheral circulatory disorder | 616591000006117   | 421365002       | 2618205010      |
| Type I diabetes mellitus with multiple complications         | 913541000006118   | 422228004       | 2618232017      |
| Type I diabetes mellitus with retinopathy                    | 913671000006113   | 420789003       | 3699407019      |
| Type I diabetes mellitus with mononeuropathy                 | 913791000006119   | 420918009       | 3697664014      |
| Type II diabetes mellitus with neurological complications    | 914081000006117   | 421326000       | 3695406015      |
| Type II diabetes mellitus with retinopathy                   | 914161000006114   | 422034002       | 3699410014      |
| Type II diabetes mellitus with mononeuropathy                | 914231000006111   | 420436000       | 3697667019      |
| Type II diabetes mellitus with diabetic cataract             | 914311000006114   | 420756003       | 3688522015      |
| Type II diabetes mellitus with gastroparesis                 | 1667921000000117  | 713703005       | 3698412014      |
| Type I diabetes mellitus with gastroparesis                  | 1667941000000112  | 713702000       | 3698406016      |
| Insulin-dependent diabetes mellitus with neurological comps  | 771481000006112   | 422088007       | 3688477014      |
| Insulin-dependent diabetes mellitus with ophthalmic comps    | 771491000006110   | 25093002        | 3688467012      |
| Other specified diabetes mellitus with ketoacidosis          | 292478012         | 420422005       | 2616611010      |
| Diabetes mellitus NOS with ketoacidotic coma                 | 292489017         | 420422005       | 2616611010      |
| Other specified diabetes mellitus with renal complications   | 292495016         | 127013003       | 301016          |
| Type I diabetes mellitus - poor control                      | 292550013         | 444073006       | 2872487013      |
| Type II diabetes mellitus - poor control                     | 292589019         | 443694000       | 2921019012      |
| [X]Other specified diabetes mellitus                         | 293756010         | 73211009        | 121589010       |
| Insulin-dependent diabetes mellitus with ulcer               | 4758061000006110  | 190368000       | 292539010       |
| Diabetes type 2 with cataract                                | 6959811000006110  | 420756003       | 3035281015      |
| Diabetes type 2 with retinopathy                             | 6982521000006119  | 422034002       | 3035295017      |
| Diabetes mellitus, Addison's disease and myxoedema           | 3862341000006115  | 83728000        | 505747013       |
| Type I diabetes mellitus with arthropathy                    | 459292011         | 314893005       | 459292011       |
| Type I diabetes mellitus with arthropathy                    | 459294012         | 314893005       | 459294012       |
| Type II diabetes mellitus with peripheral angiopathy         | 459306016         | 314902007       | 459306016       |
| Type 2 diabetes mellitus with peripheral angiopathy          | 459308015         | 314902007       | 459308015       |
| Non-insulin dependent diabetes mellitus with arthropathy     | 459309011         | 314903002       | 459309011       |
| NIDDM - Non-insulin dependent diabetes mellitus              | 493773010         | 44054006        | 493773010       |
| Secondary diabetes mellitus without complication             | 189721000000113   | 8801005         | 15518018        |
| Pre-existing diabetes mellitus, unspecified                  | 213141000006111   | 385051000000106 | 760131000000111 |
| Type 1 diabetes mellitus with hyperosmolar coma              | 4757991000006116  | 190330002       | 2967854014      |
| Type 1 diabetes mellitus with hypoglycemic coma              | 6050081000006114  | 314771006       | 459166013       |
| Diabetes type 1 with ketoacidosis                            | 6951091000006110  | 420270002       | 3035606019      |
| NIDDM with peripheral circulatory disorder                   | 12485441000006119 | 422166005       | 674961000006118 |
| DM - Diabetes mellitus                                       | 3690681000006114  | 73211009        | 502372015       |

|                                                              |                  |                  |                  |
|--------------------------------------------------------------|------------------|------------------|------------------|
| Diabetes mellitus type 2 with ketoacidotic coma              | 6979251000006110 | 421847006        | 3035601012       |
| Diet controlled diabetes mellitus                            | 4636411000006110 | 170745003        | 264680017        |
| Type I diabetes mellitus with ophthalmic complications       | 913491000006111  | 739681000        | 3698438014       |
| Diabetes mellitus NOS with neurological manifestation        | 292512019        | 422088007        | 2618195014       |
| Other specified diabetes mellitus with neurological comps    | 13761000006115   | 422088007        | 2618195014       |
| Type 1 diabetes mellitus with diabetic cataract              | 84321000006114   | 421920002        | 2618234016       |
| Type 2 diabetes mellitus with gangrene                       | 84511000006112   | 421631007        | 2618206011       |
| Type 2 diabetes mellitus with mononeuropathy                 | 84531000006118   | 420436000        | 2618201018       |
| Diabetes mellitus, adult onset, + ophthalmic manifestation   | 616491000006116  | 422099009        | 2618233010       |
| Type 1 diabetes mellitus with mononeuropathy                 | 913781000006117  | 420918009        | 2618199015       |
| Type 1 diabetes mellitus with ophthalmic complications       | 84401000006113   | 739681000        | 3537386015       |
| Diabetes mellitus, juvenile type, + ophthalmic manifestation | 616601000006113  | 739681000        | 3537386015       |
| Diabetes mellitus with polyneuropathy                        | 616451000006110  | 49455004         | 82373015         |
| Diabetes mellitus, juvenile, + other specified manifestation | 616681000006116  | 73211009         | 121589010        |
| Diabetes mellitus confirmed                                  | 1823921000006119 | 1823921000006103 | 1823921000006119 |
| Diabetic on insulin                                          | 264682013        | 170747006        | 264682013        |
| Diabetic - cooperative patient                               | 264717015        | 170769004        | 264717015        |
| Insulin treated non-insulin dependent diabetes mellitus      | 1223148019       | 237599002        | 1223148019       |
| Maturity onset diabetes                                      | 223291000000111  | 44054006         | 493774016        |
| Newly diagnosed diabetes                                     | 1694761000006113 | 405749004        | 2157525015       |
| Diabetic acidosis                                            | 6953891000006119 | 420422005        | 2622194018       |
| MODY - Maturity onset diabetes in youth type 2               | 5109611000006116 | 237604008        | 356086011        |
| Diabetes mellitus with neuropathy                            | 345487013        | 230572002        | 345487013        |
| Diabetes type 2 with neurological disorder                   | 6969931000006116 | 421326000        | 3035455016       |
| Type 2 diabetes mellitus with hyperosmolar coma              | 4758011000006112 | 190331003        | 2967818010       |
| Diabetes with coma                                           | 932641000006116  | 630521000000101  | 932641000006116  |
| DM + persist microalbuminuria                                | 933211000006112  | 658061000000102  | 933211000006112  |
| Diabetes + nephropathy                                       | 881481000006117  | 127013003        | 881481000006117  |
| Diabetes + eye manifestation                                 | 881491000006119  | 25093002         | 881491000006119  |
| Diabetes + periph.circulat.dis                               | 881511000006113  | 422275004        | 881511000006113  |
| Lipodystrophic diabetes with partial lipoatrophy             | 3730121000006115 | 75659004         | 125663012        |
| Secondary endocrine diabetes mellitus                        | 356078011        | 237601000        | 356078011        |
| Diabetes mellitus associated with genetic syndrome           | 10928019         | 5969009          | 10928019         |
| Type 1 diabetes mellitus with persistent microalbuminuria    | 1780311019       | 401110002        | 1780311019       |
| Diabetes mellitus                                            | 121589010        | 73211009         | 121589010        |
| Maturity onset diabetes in youth type II                     | 5109581000006112 | 237604008        | 356083015        |
| Insulin treated Type II diabetes mellitus                    | 841351000006110  | 237599002        | 1223147012       |
| Type I diabetes mellitus with renal complications            | 913461000006115  | 421893009        | 2623054013       |
| Type I diabetes mellitus with nephropathy                    | 913851000006119  | 421893009        | 2623054013       |



|                                                              |                  |                 |                 |
|--------------------------------------------------------------|------------------|-----------------|-----------------|
| Type II diabetes mellitus with polyneuropathy                | 914251000006116  | 713706002       | 3297353013      |
| Insulin treated Type 2 diabetes mellitus                     | 914391000006116  | 237599002       | 2967820013      |
| Type I diabetes mellitus with persistent microalbuminuria    | 928491000006110  | 401110002       | 1780311019      |
| Type I diabetes mellitus with ketoacidosis                   | 928511000006116  | 420270002       | 2967817017      |
| Type I diabetes mellitus with ketoacidotic coma              | 928531000006110  | 421075007       | 2967758019      |
| Type II diabetes mellitus with ketoacidosis                  | 928591000006114  | 421750000       | 2967754017      |
| Type I diabetes mellitus with exudative maculopathy          | 938311000006112  | 420486006       | 2618236019      |
| Insulin dependent diabetes mellitus with hypoglycaemic coma  | 459162010        | 237632004       | 356141011       |
| Pre-existing type 1 diabetes mellitus in pregnancy           | 2967831017       | 199223000       | 306106018       |
| Type I diabetes mellitus with peripheral angiopathy          | 84411000006111   | 31211000119101  | 3315042015      |
| Insulin dependent diabetes mellitus with multiple complicatn | 771381000006115  | 385041000000108 | 760111000000115 |
| Insulin dependent diabetes mellitus with polyneuropathy      | 771401000006115  | 49455004        | 82373015        |
| Insulin-dependent diabetes mellitus with renal complications | 771501000006119  | 127013003       | 301016          |
| Insulin dependent diab mell with peripheral angiopathy       | 772141000006118  | 421895002       | 2618203015      |
| IDDM with peripheral circulatory disorder                    | 787101000006114  | 421895002       | 2618203015      |
| Insulin-dependent diabetes mellitus with renal complications | 913441000006119  | 127013003       | 301016          |
| Insulin dependent diabetes mellitus with retinopathy         | 913651000006115  | 4855003         | 9093013         |
| Insulin dependent diabetes mellitus with nephropathy         | 913831000006114  | 127013003       | 301016          |
| Insulin dependent diab mell with peripheral angiopathy       | 913921000006119  | 421895002       | 2618203015      |
| Type I diabetes mellitus with peripheral angiopathy          | 913931000006116  | 31211000119101  | 3315042015      |
| Insulin dependent diab mell with neuropathic arthropathy     | 913981000006115  | 201724008       | 309740011       |
| [RFC] Diabetes                                               | 905621000006113  | 905621000006109 | 905621000006113 |
| [RFC] Diabetes mellitus                                      | 908831000006118  | 908831000006102 | 908831000006118 |
| Diabetes mellitus co-occurrent and due to cystic fibrosis    | 7063141000006118 | 426705001       | 3440582013      |
| [X]Diabetes mellitus                                         | 377001000006117  | 73211009        | 121589010       |
| Type I diabetes mellitus maturity onset                      | 292551012        | 190372001       | 292551012       |
| Type 1 diabetes mellitus maturity onset                      | 292553010        | 190372001       | 292553010       |
| Diabetes type 1 with gangrene                                | 6961101000006114 | 420825003       | 3035408014      |
| Maturity onset diabetes in youth                             | 483886014        | 609561005       | 2967884018      |
| Diabetes mellitus, Addison's disease and myxedema            | 3862421000006116 | 83728000        | 505755018       |
| Diabetes mellitus type 1                                     | 3253241000006117 | 46635009        | 197985011       |
| Diabetes with coma                                           | 881471000006115  | 26298008        | 881471000006115 |
| Diabetes mellitus autosomal dominant type 2                  | 840971000006112  | 237604008       | 356082013       |
| Type 1 diabetes mellitus with nephropathy                    | 913841000006116  | 421893009       | 2623054013      |
| Type 2 diabetes mellitus with renal complications            | 914031000006118  | 420279001       | 2618208012      |
| Type 1 diabetes mellitus with ketoacidosis                   | 928501000006119  | 420270002       | 2967817017      |

|                                                              |                   |                 |                  |
|--------------------------------------------------------------|-------------------|-----------------|------------------|
| Type 2 diabetes mellitus with persistent proteinuria         | 928541000006117   | 421986006       | 2967751013       |
| Type 2 diabetes mellitus                                     | 197761014         | 44054006        | 197761014        |
| Latent diabetes                                              | 2649991000006110  | 9414007         | 16500010         |
| Type 1 diabetes mellitus without complication                | 457326014         | 313435000       | 457326014        |
| Type 2 diabetes mellitus with arthropathy                    | 459310018         | 314903002       | 459310018        |
| Diabetic on insulin and glucagon-like peptide 1              | 1966321000006112  | 976361000000100 | 2483761000000117 |
| Diabetes mellitus NOS with hyperosmolar coma                 | 292484010         | 422126006       | 2618221017       |
| [X]Unspecified diabetes mellitus with renal complications    | 293759015         | 127013003       | 301016           |
| DM caused by insulin receptor ab                             | 3296773014        | 75682002        | 3296773014       |
| DM due to insulin receptor ab                                | 2164134013        | 75682002        | 2164134013       |
| Non-insulin dependent diabetes mellitus                      | 73466011          | 44054006        | 493773010        |
| Diabetes with peripheral circulatory disorder                | 4392211000006114  | 127014009       | 3313383012       |
| Ketoacidosis in type II diabetes mellitus                    | 6977421000006110  | 421750000       | 2618220016       |
| Diabetes mellitus, adult onset, + unspecified complication   | 616501000006112   | 422014003       | 3013072014       |
| Diabetes mellitus, juvenile type, no mention of complication | 616621000006115   | 313435000       | 457326014        |
| Insulin dependent diabetes mellitus - poor control           | 772181000006112   | 268519009       | 401531012        |
| Insulin dependent diabetes mellitus - poor control           | 913681000006111   | 268519009       | 401531012        |
| Type I diabetes mellitus with peripheral angiopathy          | 913941000006114   | 31211000119101  | 3315042015       |
| Type II diabetes mellitus with hypoglycaemic coma            | 459169018         | 719216001       | 3316336015       |
| Brittle diabetes mellitus                                    | 2683561000006119  | 11530004        | 2658852011       |
| Non-insulin dependent diabetes mellitus with gangrene        | 281211000006117   | 421631007       | 2967779019       |
| Type II diabetes mellitus with exudative maculopathy         | 12489851000006117 | 421779007       | 938331000006118  |
| Diabetes type 2 on insulin                                   | 5109461000006115  | 237599002       | 3037103012       |
| Diabetes mellitus NOS with ketoacidosis                      | 292479016         | 420422005       | 2616611010       |
| Ketoacidosis in diabetes mellitus                            | 6953871000006115  | 420422005       | 2622192019       |
| Jamaica type diabetes                                        | 1550571000000114  | 75524006        | 1550571000000114 |
| Non-insulin dependent d m with neuropathic arthropathy       | 281181000006116   | 314904008       | 459314010        |
| Type II diabetes mellitus with renal complications           | 914041000006111   | 420279001       | 3013392012       |
| Type II diabetes mellitus with persistent microalbuminuria   | 928571000006113   | 420715001       | 2967769016       |
| Type I diabetes mellitus with mononeuropathy                 | 84721000006113    | 420918009       | 3697664014       |
| Type II diabetes mellitus with diabetic cataract             | 84871000006117    | 420756003       | 3688522015       |
| Type II diabetes mellitus with mononeuropathy                | 84901000006117    | 420436000       | 3697667019       |
| Type II diabetes mellitus with neurological complications    | 84931000006113    | 421326000       | 3695406015       |
| Diabetes mellitus with nephropathy NOS                       | 292496015         | 127013003       | 301016           |
| Diabetes mellitus NOS with unspecified complication          | 292626017         | 74627003        | 123939015        |
| Type 1 diabetes mellitus uncontrolled                        | 7287611000006113  | 444073006       | 2967763015       |
| Insulin-dependent diabetes without complication              | 6030001000006116  | 313435000       | 457327017        |
| Type I diabetes mellitus with neurological complications     | 913521000006113   | 421468001       | 3695401013       |

|                                                                 |                   |                 |                  |
|-----------------------------------------------------------------|-------------------|-----------------|------------------|
| Type 1 diabetes mellitus with retinopathy                       | 913661000006118   | 420789003       | 3699407019       |
| Type 2 diabetes mellitus with ophthalmic complications          | 914051000006113   | 422099009       | 3698440016       |
| Type I diabetes mellitus with ophthalmic complications          | 84771000006114    | 739681000       | 3698438014       |
| MODY - Maturity onset diabetes in youth type II                 | 5109591000006110  | 237604008       | 356084014        |
| Type 1 diabetes mellitus with polyneuropathy                    | 913811000006115   | 713705003       | 3297342019       |
| Type II diabetes mellitus with nephropathy                      | 914271000006114   | 420279001       | 3013392012       |
| Type I diabetes mellitus with persistent proteinuria            | 928471000006114   | 420514000       | 2967914011       |
| Diabetes mellitus with hyperosmolar coma                        | 292480018         | 422126006       | 2618221017       |
| Diabetes mellitus with other specified manifestation            | 292617015         | 74627003        | 123939015        |
| Type I diabetes mellitus with peripheral angiopathy             | 84781000006112    | 31211000119101  | 3315042015       |
| Insulin-dependent diabetes without complication                 | 746791000006111   | 111552007       | 178796018        |
| Insulin dependent diabetes mellitus with arthropathy            | 771331000006116   | 39710007        | 1229552016       |
| Insulin dependent diabetes mellitus with mononeuropathy         | 771371000006118   | 230577008       | 345492010        |
| Insulin dependent diabetes mellitus with retinopathy            | 771411000006117   | 4855003         | 9093013          |
| Insulin dependent diab mell with neuropathic arthropathy        | 772131000006111   | 201724008       | 309740011        |
| Insulin dependent diabetes maturity onset                       | 772151000006116   | 73211009        | 121589010        |
| IDDM-Insulin dependent diabetes mellitus                        | 787111000006112   | 73211009        | 121589010        |
| Diabetes mellitus type II                                       | 3209431000006116  | 44054006        | 73465010         |
| Unstable diabetes                                               | 411891014         | 11530004        | 19931010         |
| Diabetes mellitus autosomal dominant                            | 483882011         | 609561005       | 2967884018       |
| Type I diabetes mellitus - poor control                         | 84661000006111    | 444073006       | 2872487013       |
| Type I diabetes mellitus with multiple complications            | 84731000006111    | 422228004       | 2967771016       |
| Diabetes mellitus, adult onset, with no mention of complication | 12718861000006118 | 532411000000102 | 1188841000000119 |
| Type 1 diabetes mellitus with ulcer                             | 292540012         | 190368000       | 292540012        |
| Type II diabetes mellitus with multiple complications           | 292576013         | 190388001       | 292576013        |
| Lipoatrophic diabetes                                           | 4392141000006116  | 127012008       | 300015           |
| Diabetes mellitus induced by steroids                           | 616241000006112   | 190447002       | 292667010        |
| Insulin dependent diabetes mellitus with ulcer                  | 771421000006113   | 422183001       | 2623058011       |
| Pre-existing diabetes mellitus in childbirth                    | 8033301000006115  | 106281000119103 | 3005777015       |
| Unstable diabetes mellitus                                      | 2683591000006110  | 11530004        | 2871747019       |
| [X]Unspecified diabetes mellitus with renal complications       | 12703991000006112 | 127013003       | 430881000006111  |
| Type 2 diabetes mellitus with retinopathy                       | 84621000006117    | 422034002       | 3699410014       |
| Non-insulin dependent diabetes mellitus with ulcer              | 280551000006114   | 190389009       | 292580015        |
| Non-insulin-dependent d m with peripheral angiopath             | 280561000006111   | 314902007       | 459307013        |
| Non-insulin-dependent diabetes mellitus with multiple comps     | 280581000006118   | 190388001       | 292578014        |
| Diabetes mellitus - juvenile                                    | 881441000006111   | 73211009        | 881441000006111  |
| Diabetes+ketoacidosis -no coma                                  | 881461000006110   | 420422005       | 881461000006110  |

|                                                                    |                   |                 |                  |
|--------------------------------------------------------------------|-------------------|-----------------|------------------|
| Diabetes + neuropathy                                              | 881501000006110   | 230572002       | 881501000006110  |
| Insulin-dependent diabetes maturity onset                          | 4758121000006115  | 190372001       | 292552017        |
| DM + persistent proteinuria                                        | 933221000006116   | 658061000000102 | 933221000006116  |
| Diabetes mellitus NOS with other specified manifestation           | 12730981000006113 | 658061000000102 | 1445831000000112 |
| Cystic fibrosis related diabetes mellitus                          | 494831000000119   | 426705001       | 2674608014       |
| Diabetes mellitus with ketoacidotic coma                           | 616381000006111   | 26298008        | 44045012         |
| Non-insulin-dependent diabetes mellitus with retinopathy           | 641581000006115   | 422034002       | 3035295017       |
| Type 1 diabetes mellitus with persistent proteinuria               | 928461000006119   | 420514000       | 2967914011       |
| Diabetes mellitus type 1 with diabetic Charcot's arthropathy       | 8022471000006114  | 71771000119100  | 3028508015       |
| Diabetes type 2 with ketoacidosis                                  | 6977431000006113  | 421750000       | 3035594017       |
| Diabetes mellitus, adult onset, + neurological manifestation       | 616481000006119   | 421326000       | 2618196010       |
| Diabetes mellitus, adult onset, with ketoacidosis                  | 616531000006116   | 421750000       | 2618220016       |
| Diabetes mellitus, adult onset, with ketoacidotic coma             | 616541000006114   | 421847006       | 2618218019       |
| Diabetes mellitus, juvenile type, with ketoacidosis                | 616641000006110   | 420270002       | 2618216015       |
| Diabetes mellitus, juvenile type, with ketoacidotic coma           | 616651000006112   | 421075007       | 2618217012       |
| Type 1 diabetes mellitus with gangrene                             | 292541011         | 420825003       | 2618207019       |
| Diabetes mellitus caused by non-steroid drugs without complication | 6837991000006112  | 413183008       | 3290307015       |
| Ketoacidosis in type I diabetes mellitus                           | 6951081000006112  | 420270002       | 2618216015       |
| Type II diabetes mellitus with exudative maculopathy               | 938331000006118   | 421779007       | 3698529010       |
| Type 1 diabetes mellitus with hypoglycaemic coma                   | 84341000006119    | 314771006       | 459161015        |
| Type 2 diabetes mellitus                                           | 84471000006119    | 44054006        | 197761014        |
| Type 2 diabetes mellitus with hypoglycaemic coma                   | 84521000006116    | 719216001       | 3316336015       |
| Type 2 diabetes mellitus with nephropathy                          | 84551000006113    | 420279001       | 3035432019       |
| Type 2 diabetes mellitus with ulcer                                | 84631000006119    | 190389009       | 292579018        |
| Type I diabetes mellitus with renal complications                  | 84801000006111    | 421893009       | 2623054013       |
| Type II diabetes mellitus with ulcer                               | 85001000006117    | 190389009       | 292581016        |
| Diabetes mellitus type 2                                           | 3209441000006114  | 44054006        | 197763012        |
| Diabetes mellitus type 1 with ketoacidotic coma                    | 6965571000006111  | 421075007       | 3035596015       |
| Maturity onset diabetes in youth type 2                            | 356085010         | 237604008       | 356085010        |
| NIDDM with peripheral circulatory disorder                         | 674961000006118   | 422166005       | 2623039019       |
| Non-insulin-dependent diabetes mellitus with renal comps           | 587521000006111   | 420279001       | 2615535015       |
| Diabetes mellitus, adult, + peripheral circulatory disorder        | 616581000006115   | 422166005       | 2618204014       |
| Type I diabetes mellitus with diabetic cataract                    | 913911000006110   | 421920002       | 3688521010       |
| Type 2 diabetes mellitus with diabetic cataract                    | 914301000006111   | 420756003       | 3688522015       |
| Insulin-dependent diabetes mellitus with ophthalmic comps          | 913471000006110   | 25093002        | 3688467012       |
| Type I diabetes mellitus with gangrene                             | 292543014         | 420825003       | 2618207019       |
| Diabetes mellitus, juvenile, + neurological manifestation          | 616671000006119   | 421468001       | 2618197018       |

|                                                              |                   |                    |                   |
|--------------------------------------------------------------|-------------------|--------------------|-------------------|
| Pre-existing diabetes mellitus, non-insulin-dependent        | 306113018         | 199230006          | 306113018         |
| Type I diabetes mellitus with polyneuropathy                 | 84791000006110    | 713705003          | 3297390014        |
| Diabetes mellitus NOS with ophthalmic manifestation          | 292503016         | 25093002           | 42062018          |
| Type 1 diabetes mellitus with diabetic cataract              | 913901000006112   | 421920002          | 2618234016        |
| Type 2 diabetes mellitus with mononeuropathy                 | 914221000006113   | 420436000          | 2618201018        |
| Labile type I diabetes mellitus                              | 5754621000006110  | 290002008          | 2872768015        |
| Diabetes mellitus NOS with no mention of complication        | 292475010         | 111552007          | 178796018         |
| Insulin dependent diabetes mellitus with diabetic cataract   | 771341000006114   | 43959009           | 73294018          |
| Insulin dependent diabetes mellitus                          | 772161000006119   | 73211009           | 121589010         |
| Insulin dependent diabetes mellitus with multiple complicat  | 913531000006111   | 385041000000108    | 760111000000115   |
| Type II diabetes mellitus with hypoglycaemic coma            | 84891000006116    | 719216001          | 3316336015        |
| Atypical diabetes mellitus                                   | 11633211000006112 | 530558861000132104 | 3334354013        |
| Acute complication co-occurrent and due to diabetes mellitus | 3636752017        | 762489000          | 3636752017        |
| Type II diabetes mellitus with ophthalmic complications      | 12702421000006111 | 422099009          | 12702421000006111 |
| Type 2 diabetes mellitus with diabetic cataract              | 84501000006114    | 420756003          | 3688522015        |
| Type I diabetes mellitus with retinopathy                    | 84811000006114    | 420789003          | 3699407019        |
| Diabetes mellitus, juvenile type, with renal manifestation   | 616661000006114   | 421893009          | 2618211013        |
| Type 1 diabetes mellitus with renal complications            | 913451000006117   | 421893009          | 2618211013        |
| Type II diabetes mellitus with ophthalmic complications      | 914061000006110   | 422099009          | 3698440016        |
| Insulin-dependent diabetes mellitus with neurological comps  | 913501000006115   | 422088007          | 3688477014        |
| Type 2 diabetes mellitus with gangrene                       | 292583018         | 421631007          | 2618206011        |
| Other specified diabetes mellitus with ophthalmic complicatn | 13771000006110    | 25093002           | 42062018          |
| Type 1 diabetes mellitus with mononeuropathy                 | 84351000006117    | 420918009          | 2618199015        |
| Type 1 diabetes mellitus with neurological complications     | 84381000006113    | 421468001          | 2618197018        |
| Type I diabetes mellitus with gangrene                       | 84701000006115    | 420825003          | 2618207019        |
| Type 1 diabetes mellitus with neurological complications     | 913511000006117   | 421468001          | 2618197018        |
| Diabetes mellitus, juvenile type, with hyperosmolar coma     | 292482014         | 190330002          | 292482014         |
| Diabetes mellitus, adult onset, with hyperosmolar coma       | 292483016         | 190331003          | 292483016         |
| Type 2 diabetes mellitus with multiple complications         | 292577016         | 190388001          | 292577016         |
| Diabetes mellitus caused by insulin receptor antibodies      | 3291658019        | 75682002           | 3291658019        |
| History of diabetes mellitus                                 | 4539561000006114  | 161445009          | 2986596017        |
| Type 1 diabetes mellitus with gastroparesis                  | 299601000000114   | 713702000          | 3698406016        |
| Diabetes mellitus with ophthalmic manifestation              | 616421000006118   | 25093002           | 3688467012        |
| Diabetes mellitus with renal manifestation                   | 616461000006112   | 127013003          | 301016            |
| Insulin treated Type 2 diabetes mellitus                     | 840951000006119   | 237599002          | 2967820013        |
| Lipoatrophic diabetes mellitus                               | 967701000006116   | 127012008          | 300015            |

|                                                            |                   |                 |                  |
|------------------------------------------------------------|-------------------|-----------------|------------------|
| Pre-existing diabetes mellitus, insulin-dependent          | 306112011         | 385051000000106 | 760131000000111  |
| Diabetes mellitus, adult onset, no mention of complication | 616511000006110   | 313436004       | 457329019        |
| Insulin dependent diabetes mellitus                        | 772171000006114   | 73211009        | 121589010        |
| Insulin dependent diabetes maturity onset                  | 913711000006112   | 73211009        | 121589010        |
| Insulin dependent diabetes mellitus with diabetic cataract | 913891000006113   | 43959009        | 73294018         |
| Type 2 diabetes mellitus with nephropathy                  | 914261000006119   | 420279001       | 3035432019       |
| DM induced by non-steroid drugs without complication       | 967631000006115   | 413183008       | 2474729016       |
| Other specified diabetes mellitus with coma                | 12725191000006116 | 630521000000101 | 1390421000000119 |
| Diabetes mellitus with other specified manifestation       | 12730971000006110 | 658011000000104 | 1445721000000115 |
| Ketoacidotic coma in type 2 diabetes mellitus              | 12704991000006114 | 421847006       | 2967777017       |
| Type II diabetes mellitus with neurological complications  | 12702411000006115 | 421326000       | 84931000006113   |
| Insulin dependent diabetes mellitus with ulcer             | 913591000006110   | 422183001       | 2623058011       |
| H/O: diabetes mellitus                                     | 251591016         | 161445009       | 251591016        |
| Type 1 diabetes mellitus with retinopathy                  | 84441000006110    | 420789003       | 3699407019       |
| Type II diabetes mellitus with retinopathy                 | 84991000006112    | 422034002       | 3699410014       |
| Type 1 diabetes mellitus with gangrene                     | 84331000006112    | 420825003       | 2618207019       |
| Type II diabetes mellitus with gangrene                    | 84881000006119    | 421631007       | 2618206011       |
| Type 1 diabetes mellitus with ophthalmic complications     | 913481000006113   | 739681000       | 3537386015       |
| Diabetic on oral treatment                                 | 264681018         | 170746002       | 264681018        |
| Insulin dependent diabetes mellitus with ulcer             | 11927551000006115 | 19429009        | 913591000006110  |
| Latent autoimmune diabetes mellitus in adult (LADA)        | 7065531000006115  | 426875007       | 2674066012       |
| Diabetic ketoacidosis                                      | 6953861000006110  | 420422005       | 2616611010       |
| MODY5 - maturity-onset diabetes of the young type 5        | 7500341000006113  | 609572000       | 3435008016       |
| Diabetes type 1 with neurological disorder                 | 6972451000006115  | 421468001       | 3035338016       |
| Type II diabetes mellitus with ophthalmic complications    | 84951000006118    | 422099009       | 3698440016       |
| Diabetes mellitus with peripheral circulatory disorder     | 616441000006113   | 421895002       | 3688501014       |
| Type 2 diabetes mellitus with neurological complications   | 914071000006115   | 421326000       | 3695406015       |
| Type 2 diabetes mellitus with retinopathy                  | 914151000006112   | 422034002       | 3699410014       |
| Type 2 diabetes mellitus with ketoacidotic coma            | 928601000006118   | 421847006       | 2618218019       |
| Type 1 diabetes mellitus                                   | 84281000006115    | 46635009        | 197984010        |
| Type 1 diabetes mellitus maturity onset                    | 84301000006116    | 190372001       | 292553010        |
| Type 1 diabetes mellitus with arthropathy                  | 84311000006118    | 314893005       | 459292011        |
| Type 2 diabetes mellitus without complication              | 84641000006112    | 313436004       | 457329019        |
| Type I diabetes mellitus without complication              | 84831000006115    | 313435000       | 457325013        |
| Type II diabetes mellitus with arthropathy                 | 84861000006112    | 314903002       | 459311019        |
| Non-insulin dependent diabetes mellitus with nephropathy   | 280531000006119   | 420279001       | 3035432019       |
| Type 1 diabetes mellitus without complication              | 84461000006114    | 313435000       | 457326014        |
| Type I diabetes mellitus with nephropathy                  | 84741000006118    | 421893009       | 2623054013       |

|                                                             |                  |                 |                 |
|-------------------------------------------------------------|------------------|-----------------|-----------------|
| Type II diabetes mellitus with multiple complications       | 84911000006119   | 190388001       | 292576013       |
| Type II diabetes mellitus without complication              | 85011000006119   | 313436004       | 457330012       |
| Non-insulin dependent diabetes mellitus with polyneuropathy | 280541000006112  | 713706002       | 3297353013      |
| Non-insulin depend diabetes mellitus with diabetic cataract | 281161000006114  | 420756003       | 3035281015      |
| Diabetes mellitus NOS with other specified manifestation    | 292621010        | 73211009        | 121589010       |
| Diabetes mellitus with unspecified complication             | 292622015        | 74627003        | 123939015       |
| Type I diabetes mellitus uncontrolled                       | 7287621000006117 | 444073006       | 2842075017      |
| Type 1 diabetes mellitus with hypoglycaemic coma            | 459161015        | 314771006       | 459161015       |
| Type 1 diabetes mellitus with neuropathic arthropathy       | 459296014        | 71771000119100  | 3010513018      |
| Type II diabetes mellitus with arthropathy                  | 459311019        | 314903002       | 459311019       |
| Diabetes mellitus -adult onset                              | 881451000006113  | 532411000000102 | 881451000006113 |
| Diabetes + other complications                              | 881521000006117  | 658011000000104 | 881521000006117 |
| Diabetic on diet only                                       | 264679015        | 170745003       | 264679015       |
| Type 2 diabetes mellitus without complication               | 457329019        | 313436004       | 457329019       |
| Type II diabetes mellitus without complication              | 457330012        | 313436004       | 457330012       |
| Diabetic on insulin and oral treatment                      | 458512016        | 314194001       | 458512016       |
| Type II diabetes mellitus with neuropathic arthropathy      | 459312014        | 314904008       | 459312014       |
| Type 2 diabetes mellitus with neuropathic arthropathy       | 459313016        | 314904008       | 459313016       |
| Maturity onset diabetes of the young, type 2                | 5109561000006119 | 237604008       | 2967875018      |
| Diabetic ketoacidosis without coma                          | 178798017        | 111556005       | 178798017       |
| Type 2 diabetes mellitus with hypoglycaemic coma            | 459167016        | 719216001       | 3316336015      |
| Maturity onset diabetes in youth type 1                     | 2476117016       | 609562003       | 2967867012      |
| Other specified diabetes mellitus with unspecified comps    | 13811000006110   | 74627003        | 123939015       |
| Diabetes mellitus type I                                    | 3253231000006110 | 46635009        | 77728011        |
| Type I diabetes mellitus with ulcer                         | 292538019        | 190368000       | 292538019       |
| Type 2 diabetes mellitus with ulcer                         | 292579018        | 190389009       | 292579018       |
| Type II diabetes mellitus with ulcer                        | 292581016        | 190389009       | 292581016       |
| Pre-existing malnutrition-related diabetes mellitus         | 306114012        | 199231005       | 306114012       |
| Type 1 diabetes mellitus - poor control                     | 292548017        | 444073006       | 2872487013      |
| Lipoatrophic diabetes mellitus without complication         | 189711000000119  | 112991000000101 | 189711000000119 |
| Secondary diabetes mellitus                                 | 15518018         | 8801005         | 15518018        |
| Type 2 diabetes mellitus - poor control                     | 292590011        | 443694000       | 2921019012      |
| Brittle diabetes                                            | 19931010         | 11530004        | 19931010        |
| [X]Pre-existing diabetes mellitus, unspecified              | 308110013        | 385051000000106 | 760131000000111 |
| Insulin-dependent diabetes without complication             | 457327017        | 111552007       | 178796018       |
| Insulin dependent diabetes mellitus with arthropathy        | 459293018        | 39710007        | 1229552016      |
| Insulin dependent diabetes mellitus with hypoglycaemic coma | 771361000006113  | 237632004       | 356141011       |

|                                                                  |                  |                |            |
|------------------------------------------------------------------|------------------|----------------|------------|
| Insulin dependent diabetes mellitus with mononeuropathy          | 913771000006115  | 230577008      | 345492010  |
| Insulin dependent diabetes mellitus with polyneuropathy          | 913801000006118  | 49455004       | 82373015   |
| Ketoacidotic coma in type I diabetes mellitus                    | 6965561000006116 | 421075007      | 2618217012 |
| Type 1 diabetes mellitus                                         | 197984010        | 46635009       | 197984010  |
| Type II diabetes mellitus                                        | 493774016        | 44054006       | 493774016  |
| Diabetes mellitus due to insulin receptor antibodies             | 125705011        | 75682002       | 125705011  |
| Insulin-dependent diabetes mellitus secretory diarrhoea syndrome | 356111014        | 237618001      | 356111014  |
| Lipodystrophic diabetes                                          | 4392151000006119 | 127012008      | 205214013  |
| Maturity onset diabetes of the young, type 1                     | 7500191000006118 | 609562003      | 2967867012 |
| Latent autoimmune diabetes mellitus in adult                     | 2674067015       | 426875007      | 2674067015 |
| Other specified diabetes mellitus with other spec comps          | 13781000006113   | 73211009       | 121589010  |
| Unstable type I diabetes mellitus                                | 72721000006113   | 290002008      | 429970018  |
| Type 2 diabetes mellitus with multiple complications             | 84541000006111   | 190388001      | 292577016  |
| Type I diabetes mellitus                                         | 84651000006114   | 46635009       | 494564012  |
| Type I diabetes mellitus maturity onset                          | 84671000006116   | 190372001      | 292551012  |
| Type I diabetes mellitus with neuropathic arthropathy            | 84761000006119   | 71771000119100 | 3010513018 |
| Type II diabetes mellitus - poor control                         | 84851000006110   | 443694000      | 2921019012 |
| Type II diabetes mellitus with neuropathic arthropathy           | 84941000006115   | 314904008      | 459312014  |
| Type I diabetes mellitus with polyneuropathy                     | 913821000006111  | 713705003      | 3297390014 |
| Insulin dependent diabetes mellitus                              | 77727018         | 73211009       | 121589010  |
| Insulin dependent diabetes mellitus with gangrene                | 771351000006111  | 422275004      | 2616612015 |
| Insulin dependent diabetes mellitus with nephropathy             | 771391000006117  | 127013003      | 301016     |
| Insulin dependent diabetes mellitus with gangrene                | 913621000006112  | 422275004      | 2616612015 |
| Pre-existing diabetes mellitus in pregnancy                      | 7500211000006117 | 609563008      | 2967860014 |
| Secondary pancreatic diabetes mellitus                           | 1230929011       | 51002006       | 1230929011 |
| Diabetes mellitus induced by non-steroid drugs                   | 2160090014       | 408540003      | 2160090014 |
| Acute complication with diabetes mellitus                        | 3636751012       | 762489000      | 3636751012 |
| Insulin dependent diabetes mellitus with hypoglycaemic coma      | 6050041000006115 | 314771006      | 459162010  |
| Secondary pancreatic diabetes mellitus without complication      | 198461000000116  | 51002006       | 84990019   |
| Brittle type 1 diabetes mellitus                                 | 5754581000006110 | 290002008      | 2872766016 |
| Diabetes mellitus with gangrene                                  | 616351000006115  | 422275004      | 2616612015 |
| Diabetes mellitus, adult, + other specified manifestation        | 616571000006118  | 73211009       | 121589010  |
| Diabetes with gangrene                                           | 616831000006118  | 422275004      | 2616612015 |
| Type I diabetes mellitus with multiple complications             | 913551000006116  | 422228004      | 2967771016 |
| Type II diabetes mellitus with persistent proteinuria            | 928551000006115  | 421986006      | 2967751013 |
| Diabetic acidosis with coma                                      | 2920971000006115 | 26298008       | 44046013   |
| Insulin dependent diabetes mellitus with hypoglycemic coma       | 6050071000006111 | 314771006      | 459165012  |



|                                                            |                  |                  |                  |
|------------------------------------------------------------|------------------|------------------|------------------|
| Diabetes mellitus caused by non-steroid drugs              | 6763751000006119 | 408540003        | 3290374011       |
| Type 2 diabetes mellitus with persistent microalbuminuria  | 928561000006118  | 420715001        | 2967769016       |
| Type I diabetes mellitus                                   | 494564012        | 46635009         | 494564012        |
| Type II diabetes mellitus with nephropathy                 | 84921000006110   | 420279001        | 3013392012       |
| Non-insulin dependent diabetes mellitus                    | 280571000006116  | 44054006         | 493773010        |
| Type 2 diabetes mellitus with polyneuropathy               | 914241000006118  | 713706002        | 3297353013       |
| Type 1 diabetes mellitus with ketoacidotic coma            | 928521000006112  | 421075007        | 2967758019       |
| Type II diabetes mellitus with ketoacidotic coma           | 928611000006115  | 421847006        | 2618218019       |
| Diabetic on oral treatment and glucagon-like peptide 1     | 1966311000006116 | 976341000000101  | 2483721000000113 |
| Pre-existing type 2 diabetes mellitus in pregnancy         | 1988741000006117 | 237627000        | 356133011        |
| Other specified diabetes mellitus with coma                | 292488013        | 420662003        | 2618230013       |
| Unstable insulin dependent diabetes mellitus               | 429972014        | 11530004         | 19931010         |
| Diabetic on subcutaneous treatment                         | 1177721000000112 | 527691000000107  | 1177721000000112 |
| Type 2 diabetes mellitus uncontrolled                      | 7281511000006118 | 443694000        | 3321322011       |
| Diabetes type 1 with cataract                              | 6980441000006114 | 421920002        | 3035484013       |
| Diabetes mellitus NOS with peripheral circulatory disorder | 292523015        | 421895002        | 2618203015       |
| Pre-existing type 2 diabetes mellitus                      | 4796321000006113 | 199230006        | 2967812011       |
| Non-insulin dependent diabetes mellitus - poor control     | 281171000006119  | 443694000        | 2842387018       |
| Diabetes mellitus with no mention of complication          | 292466013        | 111552007        | 178796018        |
| Unstable insulin dependent diabetes mellitus               | 72651000006114   | 11530004         | 19931010         |
| Unstable type 1 diabetes mellitus                          | 429971019        | 290002008        | 429971019        |
| Insulin treated Type II diabetes mellitus                  | 1223147012       | 237599002        | 1223147012       |
| Pre-existing diabetes mellitus                             | 4539551000006112 | 161445009        | 2820057017       |
| Type 2 diabetes mellitus with ketoacidosis                 | 928581000006111  | 421750000        | 2967754017       |
| Unspecified diabetes mellitus with multiple complications  | 292565014        | 385041000000108  | 760111000000115  |
| Diabetic on non-insulin injectable                         | 1780981000006115 | 1780981000006104 | 1780981000006115 |
| Type I diabetes mellitus with hypoglycaemic coma           | 459163017        | 314771006        | 459163017        |
| Type 2 diabetes mellitus with gastroparesis                | 299621000000117  | 713703005        | 3698412014       |
| Type 1 diabetes mellitus with exudative maculopathy        | 938301000006114  | 420486006        | 3698521013       |
| Type I diabetes mellitus with neuropathic arthropathy      | 459295013        | 71771000119100   | 3010513018       |
| Type 1 diabetes mellitus with neuropathic arthropathy      | 84391000006111   | 71771000119100   | 3010513018       |
| Type 2 diabetes mellitus with renal complications          | 84611000006113   | 420279001        | 2618208012       |
| Type II diabetes mellitus                                  | 84841000006113   | 44054006         | 493774016        |
| Type II diabetes mellitus with peripheral angiopathy       | 84961000006116   | 314902007        | 459306016        |
| Type I diabetes mellitus with diabetic cataract            | 84691000006115   | 421920002        | 3688521010       |
| Diabetes mellitus with neurological manifestation          | 616391000006114  | 422088007        | 3688477014       |
| Type 2 diabetes mellitus with exudative maculopathy        | 938321000006116  | 421779007        | 2618237011       |
| Non-insulin-dependent diabetes mellitus with neuro comps   | 280591000006115  | 421326000        | 3695406015       |

|                                                             |                  |           |            |
|-------------------------------------------------------------|------------------|-----------|------------|
| Non-insulin dependent diabetes mellitus with hypoglyca coma | 280511000006113  | 719216001 | 3316336015 |
| Diabetes mellitus uncontrolled                              | 5505651000006113 | 268519009 | 2920470017 |
| Diabetic on non-insulin injectable medication               | 2460251000000115 | 719566006 | 3316952014 |
| Brittle type I diabetes mellitus                            | 5754611000006119 | 290002008 | 2872767013 |
| Diabetes type 1 with retinopathy                            | 6960441000006112 | 420789003 | 3035448018 |
| Type 1 diabetes mellitus with renal complications           | 84431000006117   | 421893009 | 2618211013 |
| Type 2 diabetes mellitus with neurological complications    | 84561000006110   | 421326000 | 3695406015 |
| Type 2 diabetes mellitus with ophthalmic complications      | 84581000006117   | 422099009 | 3698440016 |
| Type II diabetes mellitus with gangrene                     | 292582011        | 421631007 | 2618206011 |

**Table S11. Anti-Diabetic Aurum product codes**

| Term from EMIS                                                                                    | Prod code ID      | dmd ID            | Drug substance name                                 |
|---------------------------------------------------------------------------------------------------|-------------------|-------------------|-----------------------------------------------------|
| Insulin aspart 100units/ml solution for injection 3ml cartridges                                  | 1862041000033113  | 3468611000001108  | Insulin aspart                                      |
| NovoRapid Penfill 100units/ml solution for injection 3ml cartridges (Novo Nordisk Ltd)            | 1862341000033110  | 3279211000001105  | Insulin aspart                                      |
| Fiasp Penfill 100units/ml solution for injection 3ml cartridges (Novo Nordisk Ltd)                | 12186641000033113 | 34043211000001101 | Insulin aspart                                      |
| NovoRapid Novolet 100units/ml solution for injection (Novo Nordisk Ltd)                           | 1862441000033116  | 3281611000001102  | Insulin aspart                                      |
| NovoRapid FlexPen 100units/ml solution for injection 3ml pre-filled pens (Novo Nordisk Ltd)       | 2796641000033115  | 3282211000001106  | Insulin aspart                                      |
| Insulin aspart 100units/ml solution for injection 3ml pre-filled disposable devices               | 3277741000033118  | 3468711000001104  | Insulin aspart                                      |
| NovoRapid FlexTouch 100units/ml solution for injection 3ml pre-filled pens (Novo Nordisk Ltd)     | 6456441000033119  | 19570211000001106 | Insulin aspart                                      |
| Fiasp FlexTouch 100units/ml solution for injection 3ml pre-filled pens (Novo Nordisk Ltd)         | 12186541000033112 | 34043011000001106 | Insulin aspart                                      |
| NovoMix 30 Penfill 100units/ml suspension for injection 3ml cartridges (Novo Nordisk Ltd)         | 2724741000033111  | 3277811000001103  | Insulin aspart/<br>Insulin aspart<br>protamine      |
| NovoMix 30 FlexPen 100units/ml suspension for injection 3ml pre-filled pens (Novo Nordisk Ltd)    | 2724841000033118  | 3277211000001104  | Insulin aspart/<br>Insulin aspart<br>protamine      |
| Human Mixtard 10 Penfill 100units/ml suspension for injection 1.5ml cartridges (Novo Nordisk Ltd) | 1818141000033110  | 3268711000001103  | Insulin isophane<br>human/ Insulin<br>soluble human |
| Mixtard 10 Penfill 100units/ml suspension for injection 3ml cartridges (Novo Nordisk Ltd)         | 2953541000033112  | 3264711000001106  | Insulin isophane<br>human/ Insulin<br>soluble human |
| Mixtard 10 NovoLet 100units/ml suspension for injection (Novo Nordisk Ltd)                        | 2953441000033111  | 3269711000001107  | Insulin isophane<br>human/ Insulin<br>soluble human |
| Insuman Comb 15 100units/ml suspension for injection 3ml cartridges (Sanofi)                      | 2158541000033117  | 3273911000001104  | Insulin isophane<br>human/ Insulin<br>soluble human |
| Insuman Comb 15 100units/ml suspension for injection 3ml pre-filled OptiSet pens (Sanofi)         | 2267041000033118  | 3270211000001103  | Insulin isophane<br>human/ Insulin<br>soluble human |
| Insuman Comb 15 100units/ml suspension for injection 5ml vials (Aventis Pharma)                   | 2158441000033118  | 3271711000001102  | Insulin isophane<br>human/ Insulin<br>soluble human |
| Human Mixtard 20 Penfill 100units/ml suspension for injection 1.5ml cartridges (Novo Nordisk Ltd) | 1818241000033115  | 3267811000001107  | Insulin isophane<br>human/ Insulin<br>soluble human |
| Mixtard 20 Penfill 100units/ml suspension for injection 3ml cartridges (Novo Nordisk Ltd)         | 2953741000033116  | 3264411000001100  | Insulin isophane<br>human/ Insulin<br>soluble human |
| Humulin M2 100units/ml suspension for injection 3ml cartridges (Eli Lilly and Company Ltd)        | 1616241000033111  | 3263611000001100  | Insulin isophane<br>human/ Insulin<br>soluble human |
| Mixtard 20 NovoLet 100units/ml suspension for injection (Novo Nordisk Ltd)                        | 2953641000033113  | 3266111000001103  | Insulin isophane<br>human/ Insulin<br>soluble human |
| Insuman Comb 25 100units/ml suspension for injection 3ml cartridges (Sanofi)                      | 2035641000033115  | 3264111000001105  | Insulin isophane<br>human/ Insulin<br>soluble human |
| Insuman Comb 25 100units/ml suspension for injection 3ml pre-filled OptiSet pens (Sanofi)         | 2267141000033119  | 3259811000001109  | Insulin isophane<br>human/ Insulin<br>soluble human |

|                                                                                                         |                  |                   |                                               |
|---------------------------------------------------------------------------------------------------------|------------------|-------------------|-----------------------------------------------|
| Insuman Comb 25 100units/ml suspension for injection 3ml pre-filled SoloStar pens (Sanofi)              | 6011841000033112 | 18150311000001109 | Insulin isophane human/ Insulin soluble human |
| Insuman Comb 25 100units/ml suspension for injection 5ml vials (Sanofi)                                 | 2035541000033116 | 3263011000001107  | Insulin isophane human/ Insulin soluble human |
| Human Mixtard 30 Penfill 100units/ml suspension for injection 1.5ml cartridges (Novo Nordisk Ltd)       | 1818341000033113 | 3275311000001104  | Insulin isophane human/ Insulin soluble human |
| Humulin M3 100units/ml suspension for injection 10ml vials (Eli Lilly and Company Ltd)                  | 725341000033110  | 3274811000001107  | Insulin isophane human/ Insulin soluble human |
| Mixtard 30 100units/ml suspension for injection 10ml vials (Novo Nordisk Ltd)                           | 2953941000033118 | 3275011000001102  | Insulin isophane human/ Insulin soluble human |
| Mixtard 30 Penfill 100units/ml suspension for injection 3ml cartridges (Novo Nordisk Ltd)               | 2954041000033116 | 3273111000001102  | Insulin isophane human/ Insulin soluble human |
| Humulin M3 100units/ml suspension for injection 3ml cartridges (Eli Lilly and Company Ltd)              | 1616341000033118 | 3273611000001105  | Insulin isophane human/ Insulin soluble human |
| HumaJect M3 Pen 100units/ml suspension for injection (Eli Lilly and Company Ltd)                        | 727341000033117  | 3272211000001102  | Insulin isophane human/ Insulin soluble human |
| Mixtard 30 InnoLet 100units/ml suspension for injection 3ml pre-filled pens (Novo Nordisk Ltd)          | 2644741000033116 | 3271611000001106  | Insulin isophane human/ Insulin soluble human |
| Mixtard 30 NovoLet 100units/ml suspension for injection (Novo Nordisk Ltd)                              | 2953841000033114 | 3270511000001100  | Insulin isophane human/ Insulin soluble human |
| Humulin M3 Pen 100units/ml suspension for injection 3ml pre-filled pens (Eli Lilly and Company Ltd)     | 3333841000033113 | 9437511000001101  | Insulin isophane human/ Insulin soluble human |
| Humulin M3 KwikPen 100units/ml suspension for injection 3ml pre-filled pens (Eli Lilly and Company Ltd) | 5910741000033117 | 17609511000001109 | Insulin isophane human/ Insulin soluble human |
| Human Mixtard 40 Penfill 100units/ml suspension for injection 1.5ml cartridges (Novo Nordisk Ltd)       | 1818441000033119 | 3285511000001103  | Insulin isophane human/ Insulin soluble human |
| Mixtard 40 Penfill 100units/ml suspension for injection 3ml cartridges (Novo Nordisk Ltd)               | 2954241000033112 | 3281211000001104  | Insulin isophane human/ Insulin soluble human |
| Mixtard 40 NovoLet 100units/ml suspension for injection (Novo Nordisk Ltd)                              | 2954141000033117 | 3272011000001107  | Insulin isophane human/ Insulin soluble human |
| Human Mixtard 50 Penfill 100units/ml suspension for injection 1.5ml cartridges (Novo Nordisk Ltd)       | 1818541000033118 | 3273411000001107  | Insulin isophane human/ Insulin soluble human |
| Humulin M5 100units/ml suspension for injection 10ml vials (Eli Lilly and Company Ltd)                  | 722841000033112  | 3271011000001104  | Insulin isophane human/ Insulin soluble human |
| Insuman Comb 50 100units/ml suspension for injection 3ml cartridges (Sanofi)                            | 2158741000033113 | 3272411000001103  | Insulin isophane human/ Insulin soluble human |
| Mixtard 50 Penfill 100units/ml suspension for injection 3ml cartridges (Novo Nordisk Ltd)               | 2954541000033114 | 3272811000001101  | Insulin isophane human/ Insulin soluble human |
| Mixtard 50 NovoLet 100units/ml suspension for injection (Novo Nordisk Ltd)                              | 2954341000033119 | 3278311000001108  | Insulin isophane human/ Insulin soluble human |
| Insuman Comb 50 100units/ml suspension for injection 3ml pre-filled OptiSet pens (Sanofi)               | 2267241000033114 | 3278611000001103  | Insulin isophane human/ Insulin soluble human |

|                                                                                                            |                  |                   |                                                   |
|------------------------------------------------------------------------------------------------------------|------------------|-------------------|---------------------------------------------------|
| Insuman Comb 50 100units/ml suspension for injection 5ml vials (Aventis Pharma)                            | 2158641000033116 | 3274511000001109  | Insulin isophane human/ Insulin soluble human     |
| Hypurin Porcine 30/70 Mix 100units/ml suspension for injection 1.5ml cartridges (C P Pharmaceuticals Ltd)  | 2018941000033112 | 3277711000001106  | Insulin isophane porcine/ Insulin soluble porcine |
| Hypurin Porcine 30/70 Mix 100units/ml suspension for injection 10ml vials (Wockhardt UK Ltd)               | 2018841000033116 | 3266811000001105  | Insulin isophane porcine/ Insulin soluble porcine |
| Pork Mixtard 30 100units/ml suspension for injection 10ml vials (Novo Nordisk Ltd)                         | 915641000033117  | 3267911000001102  | Insulin isophane porcine/ Insulin soluble porcine |
| Hypurin Bovine Isophane 100units/ml suspension for injection 10ml vials (Wockhardt UK Ltd)                 | 735841000033116  | 3280011000001100  | Insulin isophane bovine                           |
| Insulin isophane bovine 100units/ml suspension for injection 10ml vials                                    | 1821641000033119 | 3472311000001106  | Insulin isophane bovine                           |
| Human Insulatard Penfill 100units/ml suspension for injection 1.5ml cartridges (Novo Nordisk Ltd)          | 1714041000033116 | 3259411000001107  | Insulin isophane human                            |
| Humulin I 100units/ml suspension for injection 10ml vials (Eli Lilly and Company Ltd)                      | 724041000033112  | 3255911000001101  | Insulin isophane human                            |
| Insulatard 100units/ml suspension for injection 10ml vials (Novo Nordisk Ltd)                              | 2953241000033110 | 3256111000001105  | Insulin isophane human                            |
| Insulin isophane human 100units/ml suspension for injection 10ml vials                                     | 779141000033111  | 3472511000001100  | Insulin isophane human                            |
| Insuman Basal 100units/ml suspension for injection 5ml vials (Sanofi)                                      | 2035241000033118 | 3258411000001104  | Insulin isophane human                            |
| Insulin isophane porcine 100units/ml suspension for injection 10ml vials                                   | 1821441000033116 | 3473011000001104  | Insulin isophane porcine                          |
| Hypurin Porcine Isophane 100units/ml suspension for injection 10ml vials (Wockhardt UK Ltd)                | 734941000033111  | 3284011000001107  | Insulin isophane porcine                          |
| Pork Insulatard 100units/ml suspension for injection 10ml vials (Novo Nordisk Ltd)                         | 763341000033116  | 3333111000001107  | Insulin isophane porcine                          |
| Humalog Mix25 Pen 100units/ml suspension for injection 3ml pre-filled pens (Waymade Healthcare Plc)        | 1737041000033117 | 5268611000001103  | Insulin lispro/ Insulin lispro protamine          |
| Humalog Mix25 KwikPen 100units/ml suspension for injection 3ml pre-filled pens (Eli Lilly and Company Ltd) | 4608641000033119 | 13884711000001104 | Insulin lispro/ Insulin lispro protamine          |
| Humalog Mix50 KwikPen 100units/ml suspension for injection 3ml pre-filled pens (Eli Lilly and Company Ltd) | 4608741000033111 | 13884911000001102 | Insulin lispro/ Insulin lispro protamine          |
| Humalog Mix50 Pen 100units/ml suspension for injection 3ml pre-filled pens (Sigma Pharmaceuticals Plc)     | 2182141000033117 | 14248811000001102 | Insulin lispro/ Insulin lispro protamine          |
| Humalog Mix25 100units/ml suspension for injection 3ml cartridges (Eli Lilly and Company Ltd)              | 1736941000033118 | 3275711000001100  | Insulin lispro/ Insulin lispro protamine          |
| Hypurin Bovine Lente 100units/ml suspension for injection 10ml vials (Wockhardt UK Ltd)                    | 735941000033112  | 3280611000001107  | Insulin zinc suspension mixed bovine              |
| Hypurin Porcine 30/70 Mix 100units/ml suspension for injection 3ml cartridges (Wockhardt UK Ltd)           | 2917341000033116 | 4029411000001100  | Insulin isophane porcine/ Insulin soluble porcine |
| Hypurin Bovine Isophane 100units/ml suspension for injection 3ml cartridges (Wockhardt UK Ltd)             | 2917041000033118 | 4028311000001101  | Insulin isophane bovine                           |
| Insulin isophane bovine 100units/ml suspension for injection 3ml cartridges                                | 1821741000033111 | 4033211000001103  | Insulin isophane bovine                           |
| Hypurin Bovine Neutral 100units/ml solution for injection 3ml cartridges (Wockhardt UK Ltd)                | 2916941000033119 | 4028811000001105  | Insulin soluble bovine                            |
| Insulin isophane porcine 100units/ml suspension for injection 3ml cartridges                               | 1821541000033115 | 4053611000001100  | Insulin isophane porcine                          |
| Hypurin Porcine Isophane 100units/ml suspension for injection 3ml cartridges (Wockhardt UK Ltd)            | 2917241000033114 | 4034311000001108  | Insulin isophane porcine                          |

|                                                                                                              |                   |                   |                                             |
|--------------------------------------------------------------------------------------------------------------|-------------------|-------------------|---------------------------------------------|
| Hypurin Porcine Neutral 100units/ml solution for injection 3ml cartridges (Wockhardt UK Ltd)                 | 2917141000033119  | 4034911000001109  | Insulin soluble porcine                     |
| Insulin detemir 100units/ml solution for injection 3ml pre-filled disposable devices                         | 3136941000033116  | 7594211000001102  | Insulin detemir                             |
| Levemir FlexPen 100units/ml solution for injection 3ml pre-filled pens (Novo Nordisk Ltd)                    | 3137241000033111  | 7589411000001100  | Insulin detemir                             |
| Levemir InnoLet 100units/ml solution for injection 3ml pre-filled pens (Novo Nordisk Ltd)                    | 4126541000033110  | 11148111000001101 | Insulin detemir                             |
| Insulin detemir 100units/ml solution for injection 3ml cartridges                                            | 3137041000033115  | 7597611000001106  | Insulin detemir                             |
| Levemir Penfill 100units/ml solution for injection 3ml cartridges (Novo Nordisk Ltd)                         | 3137141000033116  | 7589911000001108  | Insulin detemir                             |
| Insulin glulisine 100units/ml solution for injection 3ml cartridges                                          | 3345741000033117  | 9532111000001100  | Insulin glulisine                           |
| Apidra 100units/ml solution for injection 3ml cartridges (Sanofi)                                            | 3345941000033119  | 9528311000001103  | Insulin glulisine                           |
| Apidra 100units/ml solution for injection 3ml OptiClik cartridges (Sanofi)                                   | 3963941000033117  | 10898411000001103 | Insulin glulisine                           |
| Insulin glulisine 100units/ml solution for injection 3ml pre-filled disposable devices                       | 3914241000033112  | 10097211000001102 | Insulin glulisine                           |
| Apidra 100units/ml solution for injection 3ml pre-filled SoloStar pens (Sanofi)                              | 4258641000033112  | 12144611000001100 | Insulin glulisine                           |
| Humalog Mix50 100units/ml suspension for injection 3ml cartridges (Eli Lilly and Company Ltd)                | 3922641000033111  | 10344911000001108 | Insulin lispro/<br>Insulin lispro protamine |
| Exubera 1mg inhalation powder blisters (Pfizer Ltd)                                                          | 3945141000033114  | 10690511000001105 | Insulin human                               |
| Exubera 3mg inhalation powder blisters (Pfizer Ltd)                                                          | 3945241000033119  | 10690811000001108 | Insulin human                               |
| Insulin human 100units/ml solution for injection 10ml vials                                                  | 10673941000033110 | 13859411000001101 | Insulin human                               |
| Insuman Infusat 100units/ml solution for injection 10ml vials (Sanofi)                                       | 10674141000033111 | 18030311000001100 | Insulin human                               |
| Humulin R 500units/ml solution for injection 20ml vials (Imported (United States))                           | 4423041000033114  | 15603111000001104 | Insulin human                               |
| Humalog Mix25 100units/ml suspension for injection 10ml vials (Eli Lilly and Company Ltd)                    | 5403541000033118  | 16530311000001107 | Insulin lispro/<br>Insulin lispro protamine |
| Insulin human 100units/ml solution for injection 3.15ml cartridges                                           | 10674041000033112 | 18083911000001104 | Insulin human                               |
| Insuman Infusat 100units/ml solution for injection 3.15ml cartridges (Sanofi)                                | 10674341000033114 | 18046311000001103 | Insulin human                               |
| Insulin degludec 100units/ml solution for injection 3ml cartridges                                           | 8264341000033118  | 21939511000001100 | Insulin degludec                            |
| Tresiba Penfill 100units/ml solution for injection 3ml cartridges (Novo Nordisk Ltd)                         | 8264441000033112  | 21928511000001109 | Insulin degludec                            |
| Tresiba FlexTouch 100units/ml solution for injection 3ml pre-filled pens (Novo Nordisk Ltd)                  | 8264141000033116  | 21930011000001100 | Insulin degludec                            |
| Insulin degludec 100units/ml solution for injection 3ml pre-filled disposable devices                        | 8263941000033117  | 21939611000001101 | Insulin degludec                            |
| Insulin degludec 200units/ml solution for injection 3ml pre-filled disposable devices                        | 8264041000033115  | 21939711000001105 | Insulin degludec                            |
| Tresiba FlexTouch 200units/ml solution for injection 3ml pre-filled pens (Novo Nordisk Ltd)                  | 8264241000033111  | 21931911000001108 | Insulin degludec                            |
| Insulin aspart 100units/ml solution for injection 1.6ml cartridges                                           | 9677041000033116  | 26655811000001102 | Insulin aspart                              |
| NovoRapid PumpCart 100units/ml solution for injection 1.6ml cartridges (Novo Nordisk Ltd)                    | 9677141000033117  | 26209611000001109 | Insulin aspart                              |
| Insulin degludec 100units/ml / Liraglutide 3.6mg/ml solution for injection 3ml pre-filled disposable devices | 10044541000033113 | 28279611000001109 | Insulin degludec/<br>Liraglutide            |
| Xultophy 100units/ml / 3.6mg/ml solution for injection 3ml pre-filled pens (Novo Nordisk Ltd)                | 10044641000033114 | 28054311000001106 | Insulin degludec/<br>Liraglutide            |

|                                                                                                        |                   |                   |                        |
|--------------------------------------------------------------------------------------------------------|-------------------|-------------------|------------------------|
| Lyumjev KwikPen 200units/ml solution for injection 3ml pre-filled pens (Eli Lilly and Company Ltd)     | 13604941000033116 | 38501011000001104 | Insulin lispro         |
| Insulin lispro 200units/ml solution for injection 3ml pre-filled disposable devices                    | 10252641000033111 | 28989711000001106 | Insulin lispro         |
| Humalog KwikPen 200units/ml solution for injection 3ml pre-filled pens (Eli Lilly and Company Ltd)     | 10252741000033119 | 28926811000001100 | Insulin lispro         |
| Insulin glargine 300units/ml solution for injection 1.5ml pre-filled disposable devices                | 10494241000033110 | 29903611000001103 | Insulin glargine       |
| Toujeo 300units/ml solution for injection 1.5ml pre-filled SoloStar pens (Sanofi)                      | 10494441000033111 | 29866811000001104 | Insulin glargine       |
| Humulin R KwikPen 500units/ml solution for injection 3ml pre-filled pens (Imported (United States))    | 12481641000033115 | 35214311000001104 | Insulin human          |
| NovoRapid 100units/ml solution for injection 10ml vials (Novo Nordisk Ltd)                             | 1862241000033117  | 3280711000001103  | Insulin aspart         |
| Insulin aspart 100units/ml solution for injection 10ml vials                                           | 1861941000033119  | 36047011000001105 | Insulin aspart         |
| Fiasp 100units/ml solution for injection 10ml vials (Novo Nordisk Ltd)                                 | 12186441000033111 | 34043411000001102 | Insulin aspart         |
| Lantus 100units/ml solution for injection 10ml vials (Sanofi)                                          | 2780741000033111  | 3287911000001100  | Insulin glargine       |
| Insulin glargine 100units/ml solution for injection 10ml vials                                         | 2798841000033115  | 36047111000001106 | Insulin glargine       |
| Apidra 100units/ml solution for injection 10ml vials (Sanofi)                                          | 3345841000033110  | 9528811000001107  | Insulin glulisine      |
| Insulin glulisine 100units/ml solution for injection 10ml vials                                        | 3345641000033114  | 36047211000001100 | Insulin glulisine      |
| Insuman Basal 100units/ml suspension for injection 3ml cartridges (Sanofi)                             | 2035441000033117  | 3265011000001108  | Insulin isophane human |
| Humulin I 100units/ml suspension for injection 3ml cartridges (Eli Lilly and Company Ltd)              | 1615941000033113  | 3264211000001104  | Insulin isophane human |
| Insulatard Penfill 100units/ml suspension for injection 3ml cartridges (Novo Nordisk Ltd)              | 2953341000033117  | 3263711000001109  | Insulin isophane human |
| Insulatard InnoLet 100units/ml suspension for injection 3ml pre-filled pens (Novo Nordisk Ltd)         | 2644641000033113  | 3261411000001102  | Insulin isophane human |
| Insulatard FlexPen 100units/ml suspension for injection (Novo Nordisk Ltd)                             | 2796741000033112  | 3262011000001103  | Insulin isophane human |
| Insulatard NovoLet 100units/ml suspension for injection (Novo Nordisk Ltd)                             | 2953141000033115  | 3262511000001106  | Insulin isophane human |
| Insuman Basal 100units/ml suspension for injection 3ml pre-filled OptiSet pens (Sanofi)                | 2266841000033110  | 3260611000001109  | Insulin isophane human |
| Humulin I Pen 100units/ml suspension for injection 3ml pre-filled pens (Eli Lilly and Company Ltd)     | 2182441000033113  | 3260811000001108  | Insulin isophane human |
| Insuman Basal 100units/ml suspension for injection 3ml pre-filled SoloStar pens (Sanofi)               | 6389641000033111  | 19354411000001104 | Insulin isophane human |
| Humulin I KwikPen 100units/ml suspension for injection 3ml pre-filled pens (Eli Lilly and Company Ltd) | 5911541000033119  | 17608511000001103 | Insulin isophane human |
| Humalog 100units/ml solution for injection 1.5ml cartridges (Eli Lilly and Company Ltd)                | 720541000033111   | 3282711000001104  | Insulin lispro         |
| Insulin lispro 100units/ml solution for injection 1.5ml cartridges                                     | 757641000033112   | 36047511000001102 | Insulin lispro         |
| Humalog 100units/ml solution for injection 10ml vials (Eli Lilly and Company Ltd)                      | 723241000033118   | 3280111000001104  | Insulin lispro         |
| Insulin lispro 100units/ml solution for injection 10ml vials                                           | 762441000033118   | 36047611000001103 | Insulin lispro         |
| Insulin lispro Sanofi 100units/ml solution for injection 10ml vials (Sanofi)                           | 12600741000033116 | 35776411000001102 | Insulin lispro         |
| Lyumjev 100units/ml solution for injection 10ml vials (Eli Lilly and Company Ltd)                      | 13605141000033117 | 38456911000001105 | Insulin lispro         |
| Humalog 100units/ml solution for injection 3ml cartridges (Eli Lilly and Company Ltd)                  | 1736841000033114  | 3284311000001105  | Insulin lispro         |

|                                                                                                           |                   |                   |                                           |
|-----------------------------------------------------------------------------------------------------------|-------------------|-------------------|-------------------------------------------|
| Lyumjev 100units/ml solution for injection 3ml cartridges (Eli Lilly and Company Ltd)                     | 13605041000033116 | 38456111000001107 | Insulin lispro                            |
| Insulin lispro Sanofi 100units/ml solution for injection 3ml cartridges (Sanofi)                          | 12600841000033114 | 35776511000001103 | Insulin lispro                            |
| Insulin lispro 100units/ml solution for injection 3ml cartridges                                          | 1739941000033110  | 36047711000001107 | Insulin lispro                            |
| Humalog KwikPen 100units/ml solution for injection 3ml pre-filled pens (Eli Lilly and Company Ltd)        | 4608541000033115  | 13877811000001105 | Insulin lispro                            |
| Humalog Pen 100units/ml solution for injection 3ml pre-filled pens (Sigma Pharmaceuticals Plc)            | 2182341000033119  | 14249011000001103 | Insulin lispro                            |
| Insulin lispro 100units/ml solution for injection 3ml pre-filled disposable devices                       | 2182241000033112  | 36047811000001104 | Insulin lispro                            |
| Insulin lispro Sanofi 100units/ml solution for injection 3ml pre-filled pens (Sanofi)                     | 12600941000033118 | 35776811000001100 | Insulin lispro                            |
| Humalog Junior KwikPen 100units/ml solution for injection 3ml pre-filled pens (Eli Lilly and Company Ltd) | 12486241000033111 | 35216811000001101 | Insulin lispro                            |
| Lyumjev KwikPen 100units/ml solution for injection 3ml pre-filled pens (Eli Lilly and Company Ltd)        | 13604841000033112 | 38465811000001104 | Insulin lispro                            |
| Lyumjev Junior KwikPen 100units/ml solution for injection 3ml pre-filled pens (Eli Lilly and Company Ltd) | 13604741000033119 | 38479611000001109 | Insulin lispro                            |
| Hypurin Bovine Protamine Zinc 100units/ml suspension for injection 10ml vials (Wockhardt UK Ltd)          | 736141000033115   | 3269911000001109  | Insulin protamine zinc bovine             |
| Insulin protamine zinc bovine 100units/ml suspension for injection 10ml vials                             | 1119741000033114  | 36047911000001109 | Insulin protamine zinc bovine             |
| Hypurin Bovine Neutral 100units/ml solution for injection 10ml vials (Wockhardt UK Ltd)                   | 736041000033119   | 3271311000001101  | Insulin soluble bovine                    |
| Human Actrapid Penfill 100units/ml solution for injection 1.5ml cartridges (Novo Nordisk Ltd)             | 721041000033110   | 3309511000001105  | Insulin soluble human                     |
| Actrapid 100units/ml solution for injection 10ml vials (Novo Nordisk Ltd)                                 | 2952841000033116  | 3312111000001108  | Insulin soluble human                     |
| Velosulin 100units/ml solution for injection 10ml vials (Novo Nordisk Ltd)                                | 2954641000033110  | 3312411000001103  | Insulin soluble human                     |
| Humulin S 100units/ml solution for injection 10ml vials (Eli Lilly and Company Ltd)                       | 724341000033114   | 3312611000001100  | Insulin soluble human                     |
| Actrapid Penfill 100units/ml solution for injection 3ml cartridges (Novo Nordisk Ltd)                     | 2953041000033119  | 3310711000001105  | Insulin soluble human                     |
| Humulin S 100units/ml solution for injection 3ml cartridges (Eli Lilly and Company Ltd)                   | 1616041000033115  | 3311311000001101  | Insulin soluble human                     |
| Insuman Rapid 100units/ml solution for injection 3ml cartridges (Sanofi)                                  | 2034641000033119  | 3311611000001106  | Insulin soluble human                     |
| Actrapid NovoLet 100units/ml solution for injection (Novo Nordisk Ltd)                                    | 2952941000033112  | 3288511000001106  | Insulin soluble human                     |
| HumaJect S Pen 100units/ml solution for injection (Eli Lilly and Company Ltd)                             | 727041000033119   | 3290411000001108  | Insulin soluble human                     |
| Insuman Rapid 100units/ml solution for injection 3ml pre-filled OptiSet pens (Sanofi)                     | 2266941000033119  | 3291711000001105  | Insulin soluble human                     |
| Insuman Rapid 100units/ml solution for injection 5ml vials (Aventis Pharma)                               | 2034441000033116  | 3294911000001105  | Insulin soluble human                     |
| Hypurin Porcine Neutral 100units/ml solution for injection 10ml vials (Wockhardt UK Ltd)                  | 735441000033119   | 3285011000001106  | Insulin soluble porcine                   |
| Pork Actrapid 100units/ml solution for injection 10ml vials (Novo Nordisk Ltd)                            | 1749441000033116  | 3285611000001104  | Insulin soluble porcine                   |
| Insulin soluble porcine 100units/ml solution for injection 10ml vials                                     | 12624241000033111 | 36048711000001108 | Insulin soluble porcine                   |
| Ultratard 100units/ml suspension for injection 10ml vials (Novo Nordisk Ltd)                              | 2954841000033111  | 3282311000001103  | Insulin zinc suspension crystalline human |



|                                                                                                                      |                   |                   |                                             |
|----------------------------------------------------------------------------------------------------------------------|-------------------|-------------------|---------------------------------------------|
| Humulin Zn 100units/ml suspension for injection 10ml vials (Eli Lilly and Company Ltd)                               | 724541000033119   | 3281811000001103  | Insulin zinc suspension crystalline human   |
| Humulin Lente 100units/ml suspension for injection 10ml vials (Eli Lilly and Company Ltd)                            | 725841000033118   | 3284911000001106  | Insulin zinc suspension mixed human         |
| Monotard 100units/ml suspension for injection 10ml vials (Novo Nordisk Ltd)                                          | 2954741000033118  | 3284111000001108  | Insulin zinc suspension mixed human         |
| Suliqua 100units/ml / 33micrograms/ml solution for injection 3ml pre-filled SoloStar pens (Sanofi)                   | 12902541000033110 | 36620611000001107 | Insulin glargine/Lixisenatide               |
| Insulin glargine 100units/ml / Lixisenatide 33micrograms/ml solution for injection 3ml pre-filled disposable devices | 12902741000033119 | 36630511000001105 | Insulin glargine/Lixisenatide               |
| Insulin glargine 100units/ml / Lixisenatide 50micrograms/ml solution for injection 3ml pre-filled disposable devices | 12902841000033112 | 36630611000001109 | Insulin glargine/Lixisenatide               |
| Suliqua 100units/ml / 50micrograms/ml solution for injection 3ml pre-filled SoloStar pens (Sanofi)                   | 12902641000033111 | 36618311000001109 | Insulin glargine/Lixisenatide               |
| Toujeo 300units/ml solution for injection 3ml pre-filled DoubleStar pens (Sanofi)                                    | 12998841000033112 | 36911311000001101 | Insulin glargine                            |
| Insulin glargine 300units/ml solution for injection 3ml pre-filled disposable devices                                | 12998741000033119 | 36931811000001104 | Insulin glargine                            |
| Lantus 100units/ml solution for injection 3ml cartridges (Sanofi)                                                    | 2780841000033118  | 3284211000001102  | Insulin glargine                            |
| Lantus 100units/ml solution for injection 3ml OptiClik cartridges (Sanofi)                                           | 3869341000033114  | 10250211000001101 | Insulin glargine                            |
| Abasaglar 100units/ml solution for injection 3ml cartridges (Eli Lilly and Company Ltd)                              | 10600641000033118 | 30172211000001102 | Insulin glargine                            |
| Insulin glargine 100units/ml solution for injection 3ml cartridges                                                   | 2798941000033111  | 38896911000001108 | Insulin glargine                            |
| Lantus 100units/ml solution for injection 3ml pre-filled OptiSet pens (Sanofi)                                       | 2780941000033114  | 3283211000001100  | Insulin glargine                            |
| Lantus 100units/ml solution for injection 3ml pre-filled SoloStar pens (Sanofi)                                      | 4258541000033111  | 11933011000001106 | Insulin glargine                            |
| Insulin glargine 100units/ml solution for injection 3ml pre-filled disposable devices                                | 2799041000033119  | 38897011000001107 | Insulin glargine                            |
| Abasaglar KwikPen 100units/ml solution for injection 3ml pre-filled pens (Eli Lilly and Company Ltd)                 | 10600741000033110 | 30171811000001105 | Insulin glargine                            |
| Semglee 100units/ml solution for injection 3ml pre-filled pens (Mylan)                                               | 12686641000033112 | 36082811000001107 | Insulin glargine                            |
| Acarbose 50mg tablets                                                                                                | 11541000033110    | 326037007         | Acarbose                                    |
| Glucobay 50mg tablets (Bayer Plc)                                                                                    | 645341000033115   | 781411000001104   | Acarbose                                    |
| Glucobay 100mg tablets (Bayer Plc)                                                                                   | 645241000033113   | 444311000001106   | Acarbose                                    |
| Acarbose 100mg tablets                                                                                               | 11441000033114    | 326038002         | Acarbose                                    |
| Eperzan 30mg powder and solvent for solution for injection pre-filled pens (GlaxoSmithKline UK Ltd)                  | 10952341000033119 | 31014311000001106 | Albiglutide                                 |
| Albiglutide 30mg powder and solvent for solution for injection pre-filled disposable devices                         | 10951041000033114 | 31015711000001109 | Albiglutide                                 |
| Albiglutide 50mg powder and solvent for solution for injection pre-filled disposable devices                         | 10951141000033113 | 31015811000001101 | Albiglutide                                 |
| Eperzan 50mg powder and solvent for solution for injection pre-filled pens (GlaxoSmithKline UK Ltd)                  | 10953041000033113 | 31014611000001101 | Albiglutide                                 |
| Vipdomet 12.5mg/1000mg tablets (Takeda UK Ltd)                                                                       | 8959941000033110  | 23632611000001103 | Alogliptin benzoate/Metformin hydrochloride |
| Alogliptin 12.5mg / Metformin 1g tablets                                                                             | 8959841000033119  | 23637211000001102 | Alogliptin benzoate/                        |

|                                                          |                  |                   |                                                                   |
|----------------------------------------------------------|------------------|-------------------|-------------------------------------------------------------------|
|                                                          |                  |                   | Metformin hydrochloride                                           |
| Alogliptin 12.5mg tablets                                | 8959341000033111 | 23637311000001105 | Alogliptin benzoate                                               |
| Vipidia 12.5mg tablets (Takeda UK Ltd)                   | 8959641000033115 | 23636011000001109 | Alogliptin benzoate                                               |
| Vipidia 25mg tablets (Takeda UK Ltd)                     | 8959741000033112 | 23636311000001107 | Alogliptin benzoate                                               |
| Alogliptin 25mg tablets                                  | 8959441000033117 | 23637411000001103 | Alogliptin benzoate                                               |
| Alogliptin 6.25mg tablets                                | 8959241000033118 | 23637511000001104 | Alogliptin benzoate                                               |
| Vipidia 6.25mg tablets (Takeda UK Ltd)                   | 8959541000033116 | 23634111000001103 | Alogliptin benzoate                                               |
| Canagliflozin 100mg tablets                              | 9110341000033112 | 703682001         | Canagliflozin hemihydrate                                         |
| Invokana 100mg tablets (Napp Pharmaceuticals Ltd)        | 9110541000033117 | 24088611000001101 | Canagliflozin hemihydrate                                         |
| Canagliflozin 300mg tablets                              | 9110441000033118 | 24104511000001103 | Canagliflozin hemihydrate                                         |
| Invokana 300mg tablets (Napp Pharmaceuticals Ltd)        | 9110641000033116 | 24088311000001106 | Canagliflozin hemihydrate                                         |
| Canagliflozin 50mg / Metformin 1g tablets                | 9851541000033114 | 28049211000001101 | Canagliflozin hemihydrate/<br>Metformin hydrochloride             |
| Vokanamet 50mg/1000mg tablets (Napp Pharmaceuticals Ltd) | 9851841000033111 | 28024411000001103 | Canagliflozin hemihydrate/<br>Metformin hydrochloride             |
| Vokanamet 50mg/850mg tablets (Napp Pharmaceuticals Ltd)  | 9851741000033118 | 28022511000001109 | Canagliflozin hemihydrate/<br>Metformin hydrochloride             |
| Canagliflozin 50mg / Metformin 850mg tablets             | 9851641000033110 | 28049311000001109 | Canagliflozin hemihydrate/<br>Metformin hydrochloride             |
| Chlorpropamide 100mg tablets                             | 249441000033114  | 325213005         | Chlorpropamide                                                    |
| Chlorpropamide 250mg tablets                             | 249541000033110  | 325214004         | Chlorpropamide                                                    |
| Forxiga 5mg tablets (AstraZeneca UK Ltd)                 | 8199541000033113 | 21609511000001105 | Dapagliflozin propanediol monohydrate                             |
| Dapagliflozin 5mg tablets                                | 8199341000033118 | 703679006         | Dapagliflozin propanediol monohydrate                             |
| Dapagliflozin 10mg tablets                               | 8199441000033112 | 703680009         | Dapagliflozin propanediol monohydrate                             |
| Forxiga 10mg tablets (AstraZeneca UK Ltd)                | 8199641000033114 | 21609811000001108 | Dapagliflozin propanediol monohydrate                             |
| Xigduo 5mg/1000mg tablets (AstraZeneca UK Ltd)           | 9106241000033119 | 24018511000001102 | Dapagliflozin propanediol monohydrate/<br>Metformin hydrochloride |
| Dapagliflozin 5mg / Metformin 1g tablets                 | 9106041000033110 | 24054611000001100 | Dapagliflozin propanediol monohydrate/<br>Metformin hydrochloride |

|                                                                                           |                   |                   |                                                                  |
|-------------------------------------------------------------------------------------------|-------------------|-------------------|------------------------------------------------------------------|
| Dapagliflozin 5mg / Metformin 850mg tablets                                               | 9106141000033114  | 24054711000001109 | Dapagliflozin propanediol monohydrate/ Metformin hydrochloride   |
| Xigduo 5mg/850mg tablets (AstraZeneca UK Ltd)                                             | 9106341000033112  | 24018111000001106 | Dapagliflozin propanediol monohydrate/ Metformin hydrochloride   |
| Saxagliptin 5mg / Dapagliflozin 10mg tablets                                              | 11898041000033111 | 33745311000001109 | Dapagliflozin propanediol monohydrate/ Saxagliptin hydrochloride |
| Qtern 5mg/10mg tablets (AstraZeneca UK Ltd)                                               | 11898141000033110 | 33682311000001103 | Dapagliflozin propanediol monohydrate/ Saxagliptin hydrochloride |
| Dulaglutide 0.75mg/0.5ml solution for injection pre-filled disposable devices             | 10207841000033118 | 28789611000001108 | Dulaglutide                                                      |
| Trulicity 0.75mg/0.5ml solution for injection pre-filled pens (Eli Lilly and Company Ltd) | 10208041000033112 | 28461011000001109 | Dulaglutide                                                      |
| Trulicity 1.5mg/0.5ml solution for injection pre-filled pens (Eli Lilly and Company Ltd)  | 10208141000033111 | 28462311000001103 | Dulaglutide                                                      |
| Dulaglutide 1.5mg/0.5ml solution for injection pre-filled disposable devices              | 10207941000033114 | 28789711000001104 | Dulaglutide                                                      |
| Jardiance 10mg tablets (Boehringer Ingelheim Ltd)                                         | 9337141000033114  | 25238811000001107 | Empagliflozin                                                    |
| Empagliflozin 10mg tablets                                                                | 9336641000033119  | 25290511000001101 | Empagliflozin                                                    |
| Empagliflozin 25mg tablets                                                                | 9336841000033118  | 25290611000001102 | Empagliflozin                                                    |
| Jardiance 25mg tablets (Boehringer Ingelheim Ltd)                                         | 9337241000033119  | 25239711000001108 | Empagliflozin                                                    |
| Empagliflozin 12.5mg / Metformin 1g tablets                                               | 10614441000033112 | 30318111000001109 | Empagliflozin/ Metformin hydrochloride                           |
| Synjardy 12.5mg/1000mg tablets (Boehringer Ingelheim Ltd)                                 | 10614841000033110 | 30175711000001100 | Empagliflozin/ Metformin hydrochloride                           |
| Synjardy 12.5mg/850mg tablets (Boehringer Ingelheim Ltd)                                  | 10614741000033117 | 30175011000001102 | Empagliflozin/ Metformin hydrochloride                           |
| Empagliflozin 12.5mg / Metformin 850mg tablets                                            | 10614341000033118 | 30318211000001103 | Empagliflozin/ Metformin hydrochloride                           |
| Empagliflozin 5mg / Metformin 1g tablets                                                  | 10614241000033111 | 30318311000001106 | Empagliflozin/ Metformin hydrochloride                           |
| Synjardy 5mg/1000mg tablets (Boehringer Ingelheim Ltd)                                    | 10614641000033114 | 30174111000001100 | Empagliflozin/ Metformin hydrochloride                           |
| Synjardy 5mg/850mg tablets (Boehringer Ingelheim Ltd)                                     | 10614541000033113 | 30173411000001107 | Empagliflozin/ Metformin hydrochloride                           |
| Empagliflozin 5mg / Metformin 850mg tablets                                               | 10614141000033116 | 30318411000001104 | Empagliflozin/ Metformin hydrochloride                           |
| Ertugliflozin 15mg tablets                                                                | 12881041000033118 | 36529411000001105 | Ertugliflozin L-pyroglutamic acid                                |
| Steglatro 15mg tablets (Merck Sharp & Dohme Ltd)                                          | 12881241000033114 | 36515111000001107 | Ertugliflozin L-pyroglutamic acid                                |

|                                                                                                                     |                   |                   |                                   |
|---------------------------------------------------------------------------------------------------------------------|-------------------|-------------------|-----------------------------------|
| Ertugliflozin 5mg tablets                                                                                           | 12880941000033111 | 36529511000001109 | Ertugliflozin L-pyroglutamic acid |
| Steglatro 5mg tablets (Merck Sharp & Dohme Ltd)                                                                     | 12881141000033119 | 36514811000001101 | Ertugliflozin L-pyroglutamic acid |
| Exenatide 10micrograms/0.04ml solution for injection 2.4ml pre-filled disposable devices                            | 4149441000033117  | 11494111000001102 | Exenatide                         |
| Byetta 10micrograms/0.04ml solution for injection 2.4ml pre-filled pens (AstraZeneca UK Ltd)                        | 4149641000033115  | 11494611000001105 | Exenatide                         |
| Byetta 5micrograms/0.02ml solution for injection 1.2ml pre-filled pens (AstraZeneca UK Ltd)                         | 4149541000033116  | 11494811000001109 | Exenatide                         |
| Exenatide 5micrograms/0.02ml solution for injection 1.2ml pre-filled disposable devices                             | 4149341000033111  | 11494211000001108 | Exenatide                         |
| Exenatide 2mg powder and solvent for prolonged-release suspension for injection vials                               | 6388241000033117  | 19275411000001107 | Exenatide                         |
| Bydureon 2mg powder and solvent for prolonged-release suspension for injection vials (AstraZeneca UK Ltd)           | 6388341000033110  | 19274811000001108 | Exenatide                         |
| Bydureon 2mg powder and solvent for prolonged-release suspension for injection pre-filled pens (AstraZeneca UK Ltd) | 13427441000033112 | 28426011000001108 | Exenatide                         |
| Exenatide 2mg powder and solvent for prolonged-release suspension for injection pre-filled disposable devices       | 13427341000033118 | 28440211000001102 | Exenatide                         |
| Exenatide 2mg/0.85ml prolonged-release suspension for injection pre-filled disposable devices                       | 13427541000033113 | 38082811000001104 | Exenatide                         |
| Bydureon BCise 2mg/0.85ml prolonged-release suspension for injection pre-filled pens (AstraZeneca UK Ltd)           | 13427641000033114 | 38060511000001101 | Exenatide                         |
| Glibenclamide 2.5mg tablets                                                                                         | 644541000033111   | 325218001         | Glibenclamide                     |
| Euglucon 2.5mg tablets (Aventis Pharma)                                                                             | 557241000033113   | 233411000001102   | Glibenclamide                     |
| Semi-Daonil 2.5mg tablets (Sanofi)                                                                                  | 1278041000033114  | 140711000001103   | Glibenclamide                     |
| Diabetamide 2.5mg tablets (Ashbourne Pharmaceuticals Ltd)                                                           | 462041000033119   | 13511000001103    | Glibenclamide                     |
| Daonil 5mg tablets (Sanofi)                                                                                         | 406841000033114   | 234011000001108   | Glibenclamide                     |
| Diabetamide 5mg tablets (Ashbourne Pharmaceuticals Ltd)                                                             | 462141000033115   | 287811000001101   | Glibenclamide                     |
| Euglucon 5mg tablets (Sanofi)                                                                                       | 557341000033115   | 322511000001103   | Glibenclamide                     |
| Glibenclamide 5mg tablets                                                                                           | 644641000033112   | 325219009         | Glibenclamide                     |
| Glibenclamide 5mg/5ml oral solution                                                                                 | 5968741000033115  | 8523711000001107  | Glibenclamide                     |
| Glibenclamide 5mg/5ml oral suspension                                                                               | 5968841000033113  | 8523811000001104  | Glibenclamide                     |
| Amglidia 0.6mg/ml oral suspension with 1ml oral syringe (Amring Pharmaceuticals Ltd)                                | 13122741000033116 | 37337011000001106 | Glibenclamide                     |
| Amglidia 0.6mg/ml oral suspension with 5ml oral syringe (Amring Pharmaceuticals Ltd)                                | 13122841000033114 | 37337211000001101 | Glibenclamide                     |
| Glibenclamide 600micrograms/ml oral suspension sugar free                                                           | 13122541000033112 | 37405911000001104 | Glibenclamide                     |
| Glibenclamide 6mg/ml oral suspension sugar free                                                                     | 13122641000033113 | 37406011000001107 | Glibenclamide                     |
| Amglidia 6mg/ml oral suspension with 1ml oral syringe (Amring Pharmaceuticals Ltd)                                  | 13122941000033118 | 37337511000001103 | Glibenclamide                     |
| Amglidia 6mg/ml oral suspension with 5ml oral syringe (Amring Pharmaceuticals Ltd)                                  | 13123041000033111 | 37337711000001108 | Glibenclamide                     |
| Gliclazide 80mg tablets                                                                                             | 646441000033117   | 325242002         | Gliclazide                        |
| Diaglyk 80mg tablets (Ashbourne Pharmaceuticals Ltd)                                                                | 1602941000033117  | 49111000001103    | Gliclazide                        |
| Diamicron 80mg tablets (Servier Laboratories Ltd)                                                                   | 463541000033118   | 745911000001103   | Gliclazide                        |
| Gliclazide 40mg/5ml oral suspension                                                                                 | 5869241000033114  | 8524211000001102  | Gliclazide                        |
| Gliclazide 80mg/5ml oral suspension                                                                                 | 3953041000033113  | 8524311000001105  | Gliclazide                        |

|                                                                  |                   |                   |             |
|------------------------------------------------------------------|-------------------|-------------------|-------------|
| Gliclazide 40mg tablets                                          | 5709741000033116  | 16702011000001102 | Gliclazide  |
| Zicron 40mg tablets (Bristol Laboratories Ltd)                   | 5709841000033114  | 16677511000001108 | Gliclazide  |
| Laaglyda MR 60mg tablets (Consilient Health Ltd)                 | 8298241000033118  | 22225011000001109 | Gliclazide  |
| Gliclazide 60mg modified-release tablets                         | 8298141000033113  | 22226111000001104 | Gliclazide  |
| Vamju 60mg modified-release tablets (Advanz Pharma)              | 10043441000033110 | 28420911000001109 | Gliclazide  |
| Lamzarin 60mg modified-release tablets (Key Pharmaceuticals Ltd) | 13345341000033117 | 38018511000001102 | Gliclazide  |
| Bilxona 60mg modified-release tablets (Accord Healthcare Ltd)    | 10701741000033113 | 37618711000001109 | Gliclazide  |
| Glydex 160mg tablets (Medreich Plc)                              | 12999041000033113 | 36910511000001100 | Gliclazide  |
| Gliclazide 160mg tablets                                         | 12998941000033116 | 36914911000001102 | Gliclazide  |
| Diamicon 30mg MR tablets (Servier Laboratories Ltd)              | 2289941000033113  | 3661311000001107  | Gliclazide  |
| Nazdol MR 30mg tablets (Consilient Health Ltd)                   | 4941241000033119  | 13456711000001106 | Gliclazide  |
| Edicil MR 30mg tablets (Teva UK Ltd)                             | 5815341000033115  | 15334511000001109 | Gliclazide  |
| Vitile XL 30mg tablets (Actavis UK Ltd)                          | 6135341000033117  | 18678711000001108 | Gliclazide  |
| Dacadis MR 30mg tablets (Mylan)                                  | 5378141000033117  | 16536211000001102 | Gliclazide  |
| Gliclazide 30mg modified-release tablets                         | 2289441000033115  | 38896211000001104 | Gliclazide  |
| Lamzarin 30mg modified-release tablets (Key Pharmaceuticals Ltd) | 13345241000033110 | 38018211000001100 | Gliclazide  |
| Zicron PR 30mg tablets (Bristol Laboratories Ltd)                | 11918941000033116 | 33766211000001100 | Gliclazide  |
| Bilxona 30mg modified-release tablets (Accord Healthcare Ltd)    | 10701641000033116 | 30982411000001107 | Gliclazide  |
| Vamju 30mg modified-release tablets (Advanz Pharma)              | 10043341000033116 | 28420711000001107 | Gliclazide  |
| Glimepiride 2mg tablets                                          | 645841000033112   | 325259007         | Glimepiride |
| Amaryl 2mg tablets (Zentiva)                                     | 58841000033113    | 938211000001105   | Glimepiride |
| Niddaryl 2mg tablets (Dee Pharmaceuticals Ltd)                   | 4522141000033112  | 13626511000001104 | Glimepiride |
| Niddaryl 1mg tablets (Dee Pharmaceuticals Ltd)                   | 4522041000033113  | 13626011000001107 | Glimepiride |
| Amaryl 1mg tablets (Zentiva)                                     | 59541000033116    | 228111000001101   | Glimepiride |
| Glimepiride 1mg tablets                                          | 645941000033116   | 325261003         | Glimepiride |
| Glimepiride 3mg tablets                                          | 646041000033114   | 325262005         | Glimepiride |
| Amaryl 3mg tablets (Zentiva)                                     | 59641000033115    | 164511000001108   | Glimepiride |
| Niddaryl 3mg tablets (Dee Pharmaceuticals Ltd)                   | 4522241000033117  | 13626911000001106 | Glimepiride |
| Niddaryl 4mg tablets (Dee Pharmaceuticals Ltd)                   | 4522341000033110  | 13627211000001100 | Glimepiride |
| Amaryl 4mg tablets (Zentiva)                                     | 59741000033112    | 259611000001101   | Glimepiride |
| Glimepiride 4mg tablets                                          | 646141000033113   | 325263000         | Glimepiride |
| Glimepiride 6mg/5ml oral suspension                              | 8125241000033119  | 21366911000001103 | Glimepiride |
| Minodiab 5mg tablets (Pfizer Ltd)                                | 920241000033117   | 652411000001107   | Glipizide   |
| Glibenese 5mg tablets (Pfizer Ltd)                               | 644741000033115   | 515111000001108   | Glipizide   |
| Glipizide 5mg tablets                                            | 644841000033113   | 325243007         | Glipizide   |
| Glipizide 2.5mg tablets                                          | 646541000033116   | 325248003         | Glipizide   |
| Minodiab 2.5mg tablets (Pfizer Ltd)                              | 920141000033112   | 808711000001104   | Glipizide   |
| Guar gum 5g granules sachets sugar free                          | 655141000033116   | 325287003         | Guar gum    |
| Guarem 5g granules sachets (Shire Pharmaceuticals Ltd)           | 654941000033115   | 4667411000001106  | Guar gum    |

|                                                                                          |                   |                   |                                                         |
|------------------------------------------------------------------------------------------|-------------------|-------------------|---------------------------------------------------------|
| Linagliptin 5mg tablets                                                                  | 6444041000033117  | 19525211000001103 | Linagliptin                                             |
| Trajenta 5mg tablets (Boehringer Ingelheim Ltd)                                          | 6444141000033118  | 19492811000001108 | Linagliptin                                             |
| Jentaduetto 2.5mg/1000mg tablets (Boehringer Ingelheim Ltd)                              | 8115941000033116  | 21208511000001102 | Linagliptin/<br>Metformin<br>hydrochloride              |
| Linagliptin 2.5mg / Metformin 1g tablets                                                 | 8115741000033119  | 21245011000001106 | Linagliptin/<br>Metformin<br>hydrochloride              |
| Linagliptin 2.5mg / Metformin 850mg tablets                                              | 8115841000033112  | 21245111000001107 | Linagliptin/<br>Metformin<br>hydrochloride              |
| Jentaduetto 2.5mg/850mg tablets (Boehringer Ingelheim Ltd)                               | 8116041000033114  | 21208211000001100 | Linagliptin/<br>Metformin<br>hydrochloride              |
| Empagliflozin 10mg / Linagliptin 5mg tablets                                             | 13116741000033112 | 37280311000001109 | Empagliflozin/<br>Linagliptin                           |
| Glyxambi 10mg/5mg tablets (Boehringer Ingelheim Ltd)                                     | 13116941000033110 | 37225211000001100 | Empagliflozin/<br>Linagliptin                           |
| Glyxambi 25mg/5mg tablets (Boehringer Ingelheim Ltd)                                     | 13117041000033111 | 37225511000001102 | Empagliflozin/<br>Linagliptin                           |
| Empagliflozin 25mg / Linagliptin 5mg tablets                                             | 13116841000033119 | 37280511000001103 | Empagliflozin/<br>Linagliptin                           |
| Victoza 6mg/ml solution for injection 3ml pre-filled pens (Novo Nordisk Ltd)             | 5131341000033117  | 15858611000001101 | Liraglutide                                             |
| Liraglutide 6mg/ml solution for injection 3ml pre-filled disposable devices              | 5131241000033110  | 15859111000001102 | Liraglutide                                             |
| Saxenda 6mg/ml solution for injection 3ml pre-filled pens (Novo Nordisk Ltd)             | 11919041000033113 | 33747711000001102 | Liraglutide                                             |
| Lixisenatide 10micrograms/0.2ml solution for injection 3ml pre-filled disposable devices | 8267341000033110  | 21994611000001106 | Lixisenatide                                            |
| Lyxumia 10micrograms/0.2ml solution for injection 3ml pre-filled pens (Sanofi)           | 8267541000033115  | 21941511000001102 | Lixisenatide                                            |
| Lixisenatide 20micrograms/0.2ml solution for injection 3ml pre-filled disposable devices | 8267441000033116  | 21994811000001105 | Lixisenatide                                            |
| Lyxumia 20micrograms/0.2ml solution for injection 3ml pre-filled pens (Sanofi)           | 8267641000033119  | 21941011000001105 | Lixisenatide                                            |
| Metformin 500mg tablets                                                                  | 896941000033112   | 325278007         | Metformin<br>hydrochloride                              |
| Glucophage 500mg tablets (Merck Serono Ltd)                                              | 644941000033117   | 363211000001102   | Metformin<br>hydrochloride                              |
| Glucophage 850mg tablets (Merck Serono Ltd)                                              | 645041000033117   | 365111000001109   | Metformin<br>hydrochloride                              |
| Metformin 850mg tablets                                                                  | 897041000033113   | 325279004         | Metformin<br>hydrochloride                              |
| Rosiglitazone 1mg / Metformin 500mg tablets                                              | 3191341000033115  | 409121008         | Metformin<br>hydrochloride/<br>Rosiglitazone<br>maleate |
| Avandamet 1mg/500mg tablets (GlaxoSmithKline UK Ltd)                                     | 2995141000033110  | 5302911000001102  | Metformin<br>hydrochloride/<br>Rosiglitazone<br>maleate |
| Avandamet 2mg/500mg tablets (GlaxoSmithKline UK Ltd)                                     | 2995241000033115  | 5303611000001103  | Metformin<br>hydrochloride/<br>Rosiglitazone<br>maleate |
| Rosiglitazone 2mg / Metformin 500mg tablets                                              | 3191441000033114  | 409122001         | Metformin<br>hydrochloride/<br>Rosiglitazone<br>maleate |
| Rosiglitazone 2mg / Metformin 1g tablets                                                 | 3200541000033116  | 409124000         | Metformin<br>hydrochloride/                             |

|                                                               |                  |                   |                                                        |
|---------------------------------------------------------------|------------------|-------------------|--------------------------------------------------------|
|                                                               |                  |                   | Rosiglitazone maleate                                  |
| Avandamet 2mg/1000mg tablets (GlaxoSmithKline UK Ltd)         | 3200741000033112 | 8176311000001105  | Metformin hydrochloride/<br>Rosiglitazone maleate      |
| Avandamet 4mg/1000mg tablets (GlaxoSmithKline UK Ltd)         | 3200841000033119 | 8174611000001109  | Metformin hydrochloride/<br>Rosiglitazone maleate      |
| Rosiglitazone 4mg / Metformin 1g tablets                      | 3200641000033115 | 409125004         | Metformin hydrochloride/<br>Rosiglitazone maleate      |
| Metformin 500mg/5ml oral solution                             | 5997041000033115 | 409197000         | Metformin hydrochloride                                |
| Pioglitazone 15mg / Metformin 850mg tablets                   | 3983941000033115 | 419873003         | Metformin hydrochloride/<br>Pioglitazone hydrochloride |
| Competact 15mg/850mg tablets (Takeda UK Ltd)                  | 3984241000033114 | 10922311000001108 | Metformin hydrochloride/<br>Pioglitazone hydrochloride |
| Metformin 500mg/5ml oral suspension                           | 2620241000033119 | 8664411000001102  | Metformin hydrochloride                                |
| Metformin 500mg/5ml oral solution sugar free                  | 3982341000033110 | 10750111000001100 | Metformin hydrochloride                                |
| Metsol 500mg/5ml oral solution (Kappin Ltd)                   | 3982441000033116 | 10741611000001100 | Metformin hydrochloride                                |
| Vildagliptin 50mg / Metformin 1g tablets                      | 4452441000033113 | 13413011000001108 | Metformin hydrochloride/<br>Vildagliptin               |
| Eucreas 50mg/1000mg tablets (Novartis Pharmaceuticals UK Ltd) | 4452541000033114 | 13412311000001101 | Metformin hydrochloride/<br>Vildagliptin               |
| Eucreas 50mg/850mg tablets (Novartis Pharmaceuticals UK Ltd)  | 4452641000033110 | 13412611000001106 | Metformin hydrochloride/<br>Vildagliptin               |
| Vildagliptin 50mg / Metformin 850mg tablets                   | 4452341000033119 | 13413111000001109 | Metformin hydrochloride/<br>Vildagliptin               |
| Metformin 1g oral powder sachets sugar free                   | 5007741000033111 | 15411211000001106 | Metformin hydrochloride                                |
| Glucophage 1000mg oral powder sachets (Merck Serono Ltd)      | 5007941000033114 | 15374311000001101 | Metformin hydrochloride                                |
| Metformin 500mg oral powder sachets sugar free                | 5007641000033119 | 15411311000001103 | Metformin hydrochloride                                |
| Glucophage 500mg oral powder sachets (Merck Serono Ltd)       | 5007841000033118 | 15373711000001104 | Metformin hydrochloride                                |
| Janumet 50mg/1000mg tablets (Merck Sharp & Dohme Ltd)         | 5132241000033116 | 17060511000001108 | Metformin hydrochloride/<br>Sitagliptin phosphate      |
| Metformin 1g / Sitagliptin 50mg tablets                       | 5576041000033115 | 17071811000001108 | Metformin hydrochloride/<br>Sitagliptin phosphate      |
| Saxagliptin 2.5mg / Metformin 1g tablets                      | 8242641000033113 | 21711411000001100 | Metformin hydrochloride/<br>Saxagliptin hydrochloride  |

|                                                         |                   |                   |                                                       |
|---------------------------------------------------------|-------------------|-------------------|-------------------------------------------------------|
| Komboglyze 2.5mg/1000mg tablets (AstraZeneca UK Ltd)    | 8242841000033114  | 21705611000001102 | Metformin hydrochloride/<br>Saxagliptin hydrochloride |
| Komboglyze 2.5mg/850mg tablets (AstraZeneca UK Ltd)     | 8242741000033116  | 21705311000001107 | Metformin hydrochloride/<br>Saxagliptin hydrochloride |
| Saxagliptin 2.5mg / Metformin 850mg tablets             | 8242541000033112  | 21711511000001101 | Metformin hydrochloride/<br>Saxagliptin hydrochloride |
| Metformin 1g/5ml oral solution sugar free               | 11781341000033117 | 33550811000001105 | Metformin hydrochloride                               |
| Metformin 850mg/5ml oral solution sugar free            | 11781441000033111 | 33550911000001100 | Metformin hydrochloride                               |
| Bolamyn SR 1000mg tablets (Teva UK Ltd)                 | 8348941000033113  | 22308811000001109 | Metformin hydrochloride                               |
| Metabet SR 1000mg tablets (Morningside Healthcare Ltd)  | 6279741000033117  | 18885611000001108 | Metformin hydrochloride                               |
| Glucophage SR 1000mg tablets (Merck Serono Ltd)         | 4945341000033110  | 15367811000001105 | Metformin hydrochloride                               |
| Metformin 1g modified-release tablets                   | 4945241000033117  | 38893711000001104 | Metformin hydrochloride                               |
| Yaltormin SR 1000mg tablets (Wockhardt UK Ltd)          | 12593341000033117 | 35548311000001108 | Metformin hydrochloride                               |
| Meijumet 1000mg modified-release tablets (Medreich Plc) | 12326741000033119 | 34553311000001105 | Metformin hydrochloride                               |
| Sukkarto SR 1000mg tablets (Morningside Healthcare Ltd) | 9230841000033114  | 24568211000001104 | Metformin hydrochloride                               |
| Glucient SR 1000mg tablets (Consilient Health Ltd)      | 10598941000033117 | 30012311000001107 | Metformin hydrochloride                               |
| Glucophage SR 750mg tablets (Merck Serono Ltd)          | 4549241000033113  | 13748611000001107 | Metformin hydrochloride                               |
| Glucient SR 750mg tablets (Consilient Health Ltd)       | 10598841000033113 | 30012111000001105 | Metformin hydrochloride                               |
| Meijumet 750mg modified-release tablets (Medreich Plc)  | 12326641000033111 | 34552811000001109 | Metformin hydrochloride                               |
| Yaltormin SR 750mg tablets (Wockhardt UK Ltd)           | 12593241000033110 | 35548011000001105 | Metformin hydrochloride                               |
| Metformin 750mg modified-release tablets                | 4549141000033118  | 38893811000001107 | Metformin hydrochloride                               |
| Sukkarto SR 750mg tablets (Morningside Healthcare Ltd)  | 13429041000033112 | 38238111000001109 | Metformin hydrochloride                               |
| Glucophage SR 500mg tablets (Merck Serono Ltd)          | 3228241000033112  | 8990711000001100  | Metformin hydrochloride                               |
| Bolamyn SR 500mg tablets (Teva UK Ltd)                  | 4957741000033118  | 14183911000001108 | Metformin hydrochloride                               |
| Metabet SR 500mg tablets (Morningside Healthcare Ltd)   | 6029841000033115  | 18141911000001101 | Metformin hydrochloride                               |
| Glucient SR 500mg tablets (Consilient Health Ltd)       | 6391041000033117  | 19308111000001109 | Metformin hydrochloride                               |
| Diagemet XL 500mg tablets (Genus Pharmaceuticals Ltd)   | 7874941000033110  | 20552511000001105 | Metformin hydrochloride                               |
| Metformin 500mg modified-release tablets                | 3228141000033117  | 39113511000001101 | Metformin hydrochloride                               |
| Glucorex SR 500mg tablets (GlucoRx Ltd)                 | 13606641000033119 | 38749111000001108 | Metformin hydrochloride                               |
| Sukkarto SR 500mg tablets (Morningside Healthcare Ltd)  | 9230641000033113  | 24568411000001100 | Metformin hydrochloride                               |
| Yaltormin SR 500mg tablets (Wockhardt UK Ltd)           | 12593141000033115 | 35547511000001101 | Metformin hydrochloride                               |



|                                                         |                   |                   |                            |
|---------------------------------------------------------|-------------------|-------------------|----------------------------|
| Meijumet 500mg modified-release tablets (Medreich Plc)  | 12326541000033110 | 34552411000001107 | Metformin hydrochloride    |
| Metuxtan SR 500mg tablets (Accord Healthcare Ltd)       | 12664441000033115 | 35849011000001104 | Metformin hydrochloride    |
| Starlix 180mg tablets (Novartis Pharmaceuticals UK Ltd) | 2288741000033118  | 3883511000001107  | Nateglinide                |
| Nateglinide 180mg tablets                               | 2288441000033113  | 134608004         | Nateglinide                |
| Nateglinide 120mg tablets                               | 2288341000033119  | 134609007         | Nateglinide                |
| Starlix 120mg tablets (Novartis Pharmaceuticals UK Ltd) | 2288641000033110  | 3651211000001105  | Nateglinide                |
| Starlix 60mg tablets (Novartis Pharmaceuticals UK Ltd)  | 2288541000033114  | 3650611000001102  | Nateglinide                |
| Nateglinide 60mg tablets                                | 2288241000033112  | 134610002         | Nateglinide                |
| Actos 30mg tablets (Takeda UK Ltd)                      | 2191041000033110  | 446711000001101   | Pioglitazone hydrochloride |
| Pioglitazone 30mg tablets                               | 2190841000033113  | 326061000         | Pioglitazone hydrochloride |
| Glizofar 30mg tablets (Arrow Generics Ltd)              | 6526041000033117  | 20023111000001108 | Pioglitazone hydrochloride |
| Diabiom 30mg tablets (Tillomed Laboratories Ltd)        | 10337041000033113 | 29743011000001108 | Pioglitazone hydrochloride |
| Glidipion 30mg tablets (Actavis UK Ltd)                 | 8839341000033116  | 23369611000001106 | Pioglitazone hydrochloride |
| Glizofar 15mg tablets (Arrow Generics Ltd)              | 6525941000033110  | 20022911000001104 | Pioglitazone hydrochloride |
| Pioglitazone 15mg tablets                               | 2190741000033115  | 326062007         | Pioglitazone hydrochloride |
| Actos 15mg tablets (Takeda UK Ltd)                      | 2190941000033117  | 58011000001106    | Pioglitazone hydrochloride |
| Diabiom 15mg tablets (Tillomed Laboratories Ltd)        | 10336941000033112 | 29742811000001105 | Pioglitazone hydrochloride |
| Glidipion 15mg tablets (Actavis UK Ltd)                 | 10251341000033112 | 28940811000001104 | Pioglitazone hydrochloride |
| Actos 45mg tablets (Takeda UK Ltd)                      | 2996041000033119  | 5199411000001105  | Pioglitazone hydrochloride |
| Pioglitazone 45mg tablets                               | 2995941000033112  | 374897009         | Pioglitazone hydrochloride |
| Glizofar 45mg tablets (Arrow Generics Ltd)              | 6526141000033118  | 20023411000001103 | Pioglitazone hydrochloride |
| Glidipion 45mg tablets (Actavis UK Ltd)                 | 8839441000033110  | 23372211000001107 | Pioglitazone hydrochloride |
| Diabiom 45mg tablets (Tillomed Laboratories Ltd)        | 10337141000033112 | 29743211000001103 | Pioglitazone hydrochloride |
| Repaglinide 500microgram tablets                        | 1672941000033110  | 326047005         | Repaglinide                |
| NovoNorm 500microgram tablets (Novo Nordisk Ltd)        | 1659941000033116  | 152311000001101   | Repaglinide                |
| Prandin 0.5mg tablets (Novo Nordisk Ltd)                | 3993941000033119  | 10952411000001100 | Repaglinide                |
| Enyglid 0.5mg tablets (Consilient Health Ltd)           | 6391141000033118  | 19306711000001106 | Repaglinide                |
| Enyglid 1mg tablets (Consilient Health Ltd)             | 6391241000033113  | 19306911000001108 | Repaglinide                |
| Prandin 1mg tablets (Novo Nordisk Ltd)                  | 3994041000033117  | 10956911000001107 | Repaglinide                |
| NovoNorm 1mg tablets (Novo Nordisk Ltd)                 | 1660041000033118  | 494111000001103   | Repaglinide                |
| Repaglinide 1mg tablets                                 | 1672741000033112  | 326048000         | Repaglinide                |
| Repaglinide 2mg tablets                                 | 1672841000033119  | 326049008         | Repaglinide                |
| NovoNorm 2mg tablets (Novo Nordisk Ltd)                 | 1660141000033119  | 840811000001100   | Repaglinide                |
| Prandin 2mg tablets (Novo Nordisk Ltd)                  | 3994141000033118  | 10957811000001100 | Repaglinide                |
| Enyglid 2mg tablets (Consilient Health Ltd)             | 6391341000033115  | 19307311000001105 | Repaglinide                |

|                                                                                       |                   |                   |                           |
|---------------------------------------------------------------------------------------|-------------------|-------------------|---------------------------|
| Saxagliptin 2.5mg tablets                                                             | 6123241000033112  | 443067000         | Saxagliptin hydrochloride |
| Onglyza 2.5mg tablets (AstraZeneca UK Ltd)                                            | 6123341000033119  | 18596311000001108 | Saxagliptin hydrochloride |
| Saxagliptin 5mg tablets                                                               | 5316641000033118  | 443713000         | Saxagliptin hydrochloride |
| Onglyza 5mg tablets (AstraZeneca UK Ltd)                                              | 5316741000033110  | 15993011000001101 | Saxagliptin hydrochloride |
| Ozempic 0.25mg/0.19ml solution for injection 1.5ml pre-filled pens (Novo Nordisk Ltd) | 12876541000033113 | 36470811000001107 | Semaglutide               |
| Semaglutide 0.25mg/0.19ml solution for injection 1.5ml pre-filled disposable device   | 12876241000033111 | 36490911000001109 | Semaglutide               |
| Semaglutide 0.5mg/0.37ml solution for injection 1.5ml pre-filled disposable device    | 12876341000033118 | 36491011000001101 | Semaglutide               |
| Ozempic 0.5mg/0.37ml solution for injection 1.5ml pre-filled pens (Novo Nordisk Ltd)  | 12876641000033114 | 36471111000001106 | Semaglutide               |
| Ozempic 1mg/0.74ml solution for injection 3ml pre-filled pens (Novo Nordisk Ltd)      | 12876441000033112 | 36471411000001101 | Semaglutide               |
| Semaglutide 1mg/0.74ml solution for injection 3ml pre-filled disposable device        | 12876141000033116 | 36491111000001100 | Semaglutide               |
| Rybelsus 14mg tablets (Novo Nordisk Ltd)                                              | 13712741000033116 | 38732411000001108 | Semaglutide               |
| Semaglutide 14mg tablets                                                              | 13712441000033111 | 38840111000001100 | Semaglutide               |
| Semaglutide 3mg tablets                                                               | 13712241000033110 | 38840211000001106 | Semaglutide               |
| Rybelsus 3mg tablets (Novo Nordisk Ltd)                                               | 13712541000033112 | 38731811000001101 | Semaglutide               |
| Rybelsus 7mg tablets (Novo Nordisk Ltd)                                               | 13712641000033113 | 38732111000001103 | Semaglutide               |
| Semaglutide 7mg tablets                                                               | 13712341000033117 | 38840311000001103 | Semaglutide               |
| Sitagliptin 25mg tablets                                                              | 7687441000033111  | 423962004         | Sitagliptin phosphate     |
| Januvia 25mg tablets (Merck Sharp & Dohme Ltd)                                        | 7687541000033112  | 20115111000001106 | Sitagliptin phosphate     |
| Sitagliptin 100mg tablets                                                             | 4133241000033117  | 424345005         | Sitagliptin phosphate     |
| Januvia 100mg tablets (Merck Sharp & Dohme Ltd)                                       | 4133341000033110  | 11473711000001108 | Sitagliptin phosphate     |
| Januvia 50mg tablets (Merck Sharp & Dohme Ltd)                                        | 7687341000033117  | 20114811000001100 | Sitagliptin phosphate     |
| Sitagliptin 50mg tablets                                                              | 7687241000033110  | 424513004         | Sitagliptin phosphate     |
| Tolbutamide 500mg tablets                                                             | 1450941000033113  | 325267004         | Tolbutamide               |

**Table S12. Hypertension Aurum codes**

| Term                                                               | Medcode ID       | SNOMED CT Concept ID | SNOMED CT Description ID |
|--------------------------------------------------------------------|------------------|----------------------|--------------------------|
| HTN - Hypertension                                                 | 3117511000006117 | 38341003             | 2164904016               |
| Accelerated essential hypertension                                 | 3784371000006115 | 78975002             | 503982017                |
| High blood pressure                                                | 3117411000006118 | 38341003             | 64172013                 |
| Malignant hypertensive heart disease NOS                           | 299650019        | 54225002             | 90135019                 |
| History of hypertension                                            | 4540441000006117 | 161501007            | 2987063016               |
| Benign hypertensive heart disease NOS                              | 299654011        | 36221001             | 60444016                 |
| Secondary malignant hypertension NOS                               | 299677011        | 89242004             | 147988014                |
| Other specified hypertensive disease                               | 299686018        | 38341003             | 1215744012               |
| [X]Hypertension secondary to other renal disorders                 | 300871017        | 31992008             | 53452019                 |
| Benign hypertensive renal disease                                  | 1409014          | 193003               | 1409014                  |
| HHD - Hypertensive heart disease                                   | 3552531000006110 | 64715009             | 499930018                |
| Hypertensive disease                                               | 64168014         | 38341003             | 64168014                 |
| Hypertensive renal disease                                         | 64282015         | 38481006             | 64282015                 |
| Malignant hypertensive heart disease                               | 90135019         | 54225002             | 90135019                 |
| Systolic hypertension                                              | 93494011         | 56218007             | 93494011                 |
| Primary hypertension                                               | 99047018         | 59621000             | 99047018                 |
| Hypertensive heart disease NOS                                     | 741661000006118  | 64715009             | 107545013                |
| Hypertensive heart disease NOS with CCF                            | 741681000006111  | 64715009             | 107545013                |
| Hypertensive heart disease NOS without CCF                         | 741691000006114  | 64715009             | 107545013                |
| Malignant hypertension                                             | 884121000006111  | 78975002             | 884121000006111          |
| Renal hypertension                                                 | 47076011         | 38481006             | 64282015                 |
| Hypertensive crisis                                                | 84112010         | 50490005             | 84111015                 |
| Hypertensive heart disease                                         | 107545013        | 64715009             | 107545013                |
| HT - Hypertension                                                  | 3117481000006113 | 38341003             | 490281011                |
| Stage 2 hypertension                                               | 8286581000006114 | 846371000000103      | 2211211000000110         |
| Benign hypertensive heart disease without CCF                      | 504911000006115  | 77970009             | 129404019                |
| Hypertensive heart disease NOS                                     | 299655012        | 64715009             | 107545013                |
| Hypertensive heart and renal disease NOS                           | 299675015        | 86234004             | 143003017                |
| Hypertensive renal failure                                         | 3296351000006114 | 49220004             | 81984019                 |
| Cardiomegaly - hypertensive                                        | 411508017        | 275516004            | 411508017                |
| Severe hypertension (Nat Inst for Health Clinical Ex 2011)         | 1846961000006115 | 843841000000109      | 2189451000000110         |
| Stage 2 hypertension (NICE - Nat Ins for Hth Clin Excl 2011)       | 1846991000006111 | 846371000000103      | 2194941000000119         |
| Stage 1 hyperten (NICE 2011) with evidnce end organ damage         | 1908721000006111 | 908651000000101      | 2335801000000114         |
| Systemic arterial hypertension                                     | 3117461000006115 | 38341003             | 490278018                |
| High blood pressure                                                | 64172013         | 24184005             | 196353013                |
| Secondary malignant hypertension                                   | 151161000006115  | 89242004             | 147988014                |
| Benign hypertensive heart disease without congestive heart failure | 3768511000006114 | 77970009             | 129404019                |
| Malignant hypertension                                             | 3642801000006112 | 70272006             | 116721012                |

|                                                             |                  |                  |                  |
|-------------------------------------------------------------|------------------|------------------|------------------|
| Hypertensive cardiopathy                                    | 3552501000006119 | 64715009         | 107547017        |
| Hypertensive cardiomegaly                                   | 3552511000006116 | 64715009         | 107548010        |
| Hypertensive heart&renal dis wth (congestive) heart failure | 741701000006114  | 194779001        | 299672017        |
| Hyperten heart&renal dis+both(congestv)heart and renal fail | 789941000006117  | 194781004        | 299674016        |
| Hypertensive heart and renal disease with renal failure     | 299673010        | 194780003        | 299673010        |
| [X]Hypertensive diseases                                    | 300869017        | 38341003         | 1215744012       |
| Hypertensive renal disease with renal failure               | 299665018        | 49220004         | 81984019         |
| Systemic primary arterial hypertension                      | 3468501000006117 | 59621000         | 99046010         |
| Benign hypertensive heart disease with CCF                  | 504901000006118  | 194767001        | 299653017        |
| Stage 2 hypertension                                        | 1806081000006115 | 1806081000006104 | 1806081000006115 |
| HBP - High blood pressure                                   | 3117471000006110 | 38341003         | 490280012        |
| Accelerated secondary hypertension                          | 3950631000006119 | 89242004         | 508416019        |
| Hypertensive cardiovascular disease                         | 3552521000006112 | 64715009         | 107549019        |
| Benign essential hypertension                               | 3135013          | 1201005          | 3135013          |
| [RFC] Hypertension                                          | 909441000006118  | 909441000006102  | 909441000006118  |
| Essential hypertension NOS                                  | 395751018        | 59621000         | 99042012         |
| Secondary malignant renovascular hypertension               | 299676019        | 194783001        | 299676019        |
| Essential hypertension                                      | 99042012         | 59621000         | 99042012         |
| Severe hypertension                                         | 2193021000000110 | 843841000000109  | 2193021000000110 |
| Hypertension resistant to drug therapy                      | 2193971000000110 | 845891000000103  | 2193971000000110 |
| Malignant hypertensive renal disease                        | 108730018        | 65443008         | 108730018        |
| Malignant hypertensive heart AND renal disease              | 110659019        | 66610008         | 110659019        |
| H/O: hypertension                                           | 251674014        | 161501007        | 251674014        |
| [X]Other secondary hypertension                             | 300870016        | 31992008         | 53452019         |
| Hypertension confirmed                                      | 1823901000006112 | 1823901000006108 | 1823901000006112 |
| BP+ - Hypertension                                          | 3117501000006115 | 38341003         | 490283014        |
| Hypertensive vascular disease                               | 3117421000006114 | 38341003         | 64173015         |
| Benign hypertensive heart AND renal disease                 | 109700019        | 66052004         | 109700019        |
| Malignant essential hypertension                            | 131046010        | 78975002         | 131046010        |
| Hypertensive heart AND renal disease                        | 143003017        | 86234004         | 143003017        |
| Hypertensive disorder, systemic arterial                    | 3117521000006113 | 38341003         | 2671386015       |
| BP - High blood pressure                                    | 3117451000006117 | 38341003         | 490277011        |
| Resistant hypertension                                      | 8286321000006117 | 845891000000103  | 2194001000000116 |
| Severe hypertension                                         | 1806141000006113 | 1806141000006109 | 1806141000006113 |
| Hypertensive disease NOS                                    | 299687010        | 38341003         | 1215744012       |
| Hypertension NOS                                            | 790121000006116  | 38341003         | 64176011         |
| BP - hypertensive disease                                   | 523801000006119  | 38341003         | 64168014         |
| Hypertensive nephropathy                                    | 3119661000006114 | 38481006         | 64285018         |
| Hypertensive renal disease NOS                              | 395753015        | 38481006         | 64282015         |
| Hypertension due to renovascular disease                    | 4356081000006115 | 123799005        | 1220673019       |
| Malignant hypertensive heart disease with CCF               | 728671000006119  | 83105008         | 1236017010       |

|                                                                    |                  |          |                 |
|--------------------------------------------------------------------|------------------|----------|-----------------|
| Malignant hypertensive heart disease without CCF                   | 728681000006116  | 36315003 | 60617018        |
| Hypertensive renal + heart dis                                     | 884131000006114  | 86234004 | 884131000006114 |
| Hypertensive retinopathy                                           | 12496011         | 6962006  | 12496011        |
| Malignant hypertensive heart disease with congestive heart failure | 3852501000006115 | 83105008 | 137848017       |
| Benign hypertensive heart disease                                  | 60444016         | 36221001 | 60444016        |
| Idiopathic hypertension                                            | 3468491000006113 | 59621000 | 99044013        |

**Table S13. Anti-Hypertension Aurum product codes**

| Term from EMIS                                            | Prod code ID     | dmd ID            | Drug substance name                             |
|-----------------------------------------------------------|------------------|-------------------|-------------------------------------------------|
| Rasilez 300mg tablets (Noden Pharma DAC)                  | 4213941000033117 | 11961711000001103 | Aliskiren hemifumarate                          |
| Aliskiren 300mg tablets                                   | 4213741000033115 | 425669009         | Aliskiren hemifumarate                          |
| Rasilez 150mg tablets (Noden Pharma DAC)                  | 4213841000033113 | 11960911000001108 | Aliskiren hemifumarate                          |
| Aliskiren 150mg tablets                                   | 4213641000033112 | 425960005         | Aliskiren hemifumarate                          |
| Amoride 5mg tablets (Dr Reddy's Laboratories (UK) Ltd)    | 2956041000033112 | 220711000001102   | Amiloride hydrochloride                         |
| Amiloride 5mg tablets                                     | 57141000033118   | 318052005         | Amiloride hydrochloride                         |
| Amiloride 2.5mg / Cyclopentiazide 250microgram tablets    | 1903541000033116 | 318096005         | Amiloride hydrochloride/<br>Cyclopentiazide     |
| Navispare 2.5mg/250microgram tablets (Advanz Pharma)      | 956741000033114  | 535711000001100   | Amiloride hydrochloride/<br>Cyclopentiazide     |
| Burinex A 5mg/1mg tablets (LEO Pharma)                    | 172341000033112  | 33911000001104    | Amiloride hydrochloride/<br>Bumetanide          |
| Amiloride 5mg / Bumetanide 1mg tablets                    | 1845641000033119 | 318097001         | Amiloride hydrochloride/<br>Bumetanide          |
| Co-amilozide 2.5mg/25mg tablets                           | 376941000033117  | 318121006         | Amiloride hydrochloride/<br>Hydrochlorothiazide |
| Moduret 25 tablets (Merck Sharp & Dohme Ltd)              | 935441000033112  | 314211000001100   | Amiloride hydrochloride/<br>Hydrochlorothiazide |
| Synuretic 25 tablets (Dr Reddy's Laboratories (UK) Ltd)   | 2955841000033110 | 465111000001101   | Amiloride hydrochloride/<br>Hydrochlorothiazide |
| Frumil LS 20mg/2.5mg tablets (Sanofi)                     | 614341000033113  | 550711000001106   | Amiloride hydrochloride/<br>Furosemide          |
| Co-amilofruse 2.5mg/20mg tablets                          | 376841000033113  | 318135008         | Amiloride hydrochloride/<br>Furosemide          |
| Co-amilofruse 5mg/40mg tablets                            | 376641000033112  | 318136009         | Amiloride hydrochloride/<br>Furosemide          |
| Frumil 40mg/5mg tablets (Sanofi)                          | 614641000033117  | 427411000001106   | Amiloride hydrochloride/<br>Furosemide          |
| Froop Co 5mg/40mg tablets (Ashbourne Pharmaceuticals Ltd) | 1611441000033117 | 331311000001103   | Amiloride hydrochloride/<br>Furosemide          |
| Lasoride 5mg/40mg tablets (Sanofi)                        | 818941000033112  | 678511000001106   | Amiloride hydrochloride/<br>Furosemide          |
| Fru-Co 5mg/40mg tablets (Teva UK Ltd)                     | 615241000033116  | 818511000001106   | Amiloride hydrochloride/<br>Furosemide          |
| Frumil Forte 10mg/80mg tablets (Sanofi)                   | 615641000033118  | 82611000001106    | Amiloride hydrochloride/<br>Furosemide          |

|                                                                                            |                  |                   |                                                                     |
|--------------------------------------------------------------------------------------------|------------------|-------------------|---------------------------------------------------------------------|
| Co-amilofruse 10mg/80mg tablets                                                            | 376741000033115  | 318137000         | Amiloride hydrochloride/<br>Furosemide                              |
| Moducren tablets (Merck Sharp & Dohme Ltd)                                                 | 935341000033118  | 74311000001101    | Amiloride hydrochloride/<br>Hydrochlorothiazide/<br>Timolol maleate |
| Kalten capsules (M & A Pharmachem Ltd)                                                     | 793741000033117  | 237011000001100   | Amiloride hydrochloride/<br>Atenolol/<br>Hydrochlorothiazide        |
| Co-amilozide 5mg/50mg tablets                                                              | 369141000033118  | 377566005         | Amiloride hydrochloride/<br>Hydrochlorothiazide                     |
| Amilmaxco 5mg/50mg tablets (Ashbourne Pharmaceuticals Ltd)                                 | 57341000033115   | 712211000001108   | Amiloride hydrochloride/<br>Hydrochlorothiazide                     |
| Moduretic 5mg/50mg tablets (Merck Sharp & Dohme Ltd)                                       | 935541000033113  | 453811000001103   | Amiloride hydrochloride/<br>Hydrochlorothiazide                     |
| Amil-Co 5mg/50mg tablets (IVAX Pharmaceuticals UK Ltd)                                     | 60341000033110   | 636611000001107   | Amiloride hydrochloride/<br>Hydrochlorothiazide                     |
| Synuretic 50 tablets (Dr Reddy's Laboratories (UK) Ltd)                                    | 2955741000033117 | 601011000001103   | Amiloride hydrochloride/<br>Hydrochlorothiazide                     |
| Co-amilofruse 5mg/40mg/5ml oral suspension                                                 | 5710441000033117 | 8427011000001108  | Amiloride hydrochloride/<br>Furosemide                              |
| Co-amilozide 5mg/50mg/5ml oral solution                                                    | 351941000033111  | 8792311000001109  | Amiloride hydrochloride/<br>Hydrochlorothiazide                     |
| Timolol 10mg / Amiloride 2.5mg / Hydrochlorothiazide 25mg tablets (Essential Generics Ltd) | 5376441000033114 | 16458411000001107 | Amiloride hydrochloride/<br>Hydrochlorothiazide/<br>Timolol maleate |
| Amilamont 5mg/5ml oral solution sugar free (Rosemont Pharmaceuticals Ltd)                  | 2101641000033119 | 799711000001108   | Amiloride hydrochloride                                             |
| Amiloride 5mg/5ml oral solution sugar free                                                 | 53841000033117   | 35900111000001108 | Amiloride hydrochloride                                             |
| Amlodipine 5mg tablets                                                                     | 3038041000033111 | 319283006         | Amlodipine                                                          |
| Istin 5mg tablets (Upjohn UK Ltd)                                                          | 787941000033112  | 172711000001100   | Amlodipine                                                          |
| Amlostin 5mg tablets (Discovery Pharmaceuticals)                                           | 3188741000033111 | 8046211000001107  | Amlodipine                                                          |
| Amlostin 10mg tablets (Discovery Pharmaceuticals)                                          | 3188841000033118 | 8046411000001106  | Amlodipine                                                          |
| Istin 10mg tablets (Upjohn UK Ltd)                                                         | 788041000033110  | 408111000001107   | Amlodipine                                                          |
| Amlodipine 10mg tablets                                                                    | 3038141000033110 | 319284000         | Amlodipine                                                          |
| Sevikar 20mg/5mg tablets (Daiichi Sankyo UK Ltd)                                           | 5006141000033110 | 15773211000001105 | Amlodipine besilate/<br>Olmesartan medoxomil                        |
| Olmesartan medoxomil 20mg / Amlodipine 5mg tablets                                         | 5005841000033114 | 429502004         | Amlodipine besilate/<br>Olmesartan medoxomil                        |

|                                                              |                   |                   |                                                                       |
|--------------------------------------------------------------|-------------------|-------------------|-----------------------------------------------------------------------|
| Olmesartan medoxomil 40mg / Amlodipine 5mg tablets           | 5005941000033118  | 429503009         | Amlodipine besilate/<br>Olmesartan medoxomil                          |
| Sevikar 40mg/5mg tablets (Daiichi Sankyo UK Ltd)             | 5006241000033115  | 15772911000001108 | Amlodipine besilate/<br>Olmesartan medoxomil                          |
| Sevikar 40mg/10mg tablets (Daiichi Sankyo UK Ltd)            | 5006341000033113  | 15772611000001102 | Amlodipine besilate/<br>Olmesartan medoxomil                          |
| Olmesartan medoxomil 40mg / Amlodipine 10mg tablets          | 5006041000033111  | 429678006         | Amlodipine besilate/<br>Olmesartan medoxomil                          |
| Amlodipine 2.5mg tablets                                     | 13422241000033114 | 429828006         | Amlodipine                                                            |
| Amlodipine 10mg/5ml oral suspension                          | 3963741000033115  | 8278111000001105  | Amlodipine                                                            |
| Amlodipine 5mg/5ml oral suspension                           | 5888741000033110  | 8278311000001107  | Amlodipine                                                            |
| Amlodipine 10mg / Valsartan 160mg tablets                    | 4021641000033111  | 11160111000001107 | Amlodipine besilate/ Valsartan                                        |
| Exforge 10mg/160mg tablets (Novartis Pharmaceuticals UK Ltd) | 4021941000033116  | 11160711000001108 | Amlodipine besilate/ Valsartan                                        |
| Exforge 5mg/160mg tablets (Novartis Pharmaceuticals UK Ltd)  | 4021841000033112  | 11161511000001105 | Amlodipine besilate/ Valsartan                                        |
| Amlodipine 5mg / Valsartan 160mg tablets                     | 4021541000033110  | 11160211000001101 | Amlodipine besilate/ Valsartan                                        |
| Amlodipine 5mg / Valsartan 80mg tablets                      | 4021441000033114  | 11160311000001109 | Amlodipine besilate/ Valsartan                                        |
| Exforge 5mg/80mg tablets (Novartis Pharmaceuticals UK Ltd)   | 4021741000033119  | 11161811000001108 | Amlodipine besilate/ Valsartan                                        |
| Amlodipine 5mg/5ml oral solution                             | 5490241000033113  | 13892511000001100 | Amlodipine                                                            |
| Amlodipine 1.5mg/5ml oral suspension                         | 4897741000033118  | 15773511000001108 | Amlodipine                                                            |
| Sevikar HCT 20mg/5mg/12.5mg tablets (Daiichi Sankyo UK Ltd)  | 6180641000033112  | 18986411000001108 | Amlodipine besilate/<br>Hydrochlorothiazid e/<br>Olmesartan medoxomil |
| Sevikar HCT 40mg/10mg/12.5mg tablets (Daiichi Sankyo UK Ltd) | 6180841000033113  | 18987011000001101 | Amlodipine besilate/<br>Hydrochlorothiazid e/<br>Olmesartan medoxomil |
| Sevikar HCT 40mg/10mg/25mg tablets (Daiichi Sankyo UK Ltd)   | 6181041000033110  | 18987611000001108 | Amlodipine besilate/<br>Hydrochlorothiazid e/<br>Olmesartan medoxomil |
| Sevikar HCT 40mg/5mg/12.5mg tablets (Daiichi Sankyo UK Ltd)  | 6180741000033115  | 18986711000001102 | Amlodipine besilate/<br>Hydrochlorothiazid e/<br>Olmesartan medoxomil |
| Sevikar HCT 40mg/5mg/25mg tablets (Daiichi Sankyo UK Ltd)    | 6180941000033117  | 18987311000001103 | Amlodipine besilate/<br>Hydrochlorothiazid e/<br>Olmesartan medoxomil |
| Amlodipine 10mg/5ml oral solution                            | 7740641000033112  | 20478011000001105 | Amlodipine                                                            |
| Perindopril erbumine 4mg / Amlodipine 10mg tablets           | 9105341000033116  | 23984911000001108 | Amlodipine besilate/                                                  |



|                                                          |                   |                   |                                                   |
|----------------------------------------------------------|-------------------|-------------------|---------------------------------------------------|
|                                                          |                   |                   | Perindopril erbumine                              |
| Perindopril erbumine 4mg / Amlodipine 5mg tablets        | 9105241000033114  | 23985011000001108 | Amlodipine besilate/<br>Perindopril erbumine      |
| Perindopril erbumine 8mg / Amlodipine 10mg tablets       | 9105541000033111  | 23985111000001109 | Amlodipine besilate/<br>Perindopril erbumine      |
| Perindopril erbumine 8mg / Amlodipine 5mg tablets        | 9105441000033110  | 23985211000001103 | Amlodipine besilate/<br>Perindopril erbumine      |
| Amlodipine 10mg/5ml oral solution sugar free             | 10387441000033111 | 29826211000001109 | Amlodipine                                        |
| Amlodipine 5mg/5ml oral solution sugar free              | 4508041000033119  | 29826311000001101 | Amlodipine                                        |
| Amlodipine 5mg/5ml oral suspension sugar free            | 12682241000033110 | 36237311000001101 | Amlodipine                                        |
| Edarbi 40mg tablets (Takeda UK Ltd)                      | 7755241000033119  | 20351211000001103 | Azilsartan medoxomil                              |
| Azilsartan medoxomil 40mg tablets                        | 7754941000033110  | 449109006         | Azilsartan medoxomil                              |
| Azilsartan medoxomil 80mg tablets                        | 7755041000033110  | 449333009         | Azilsartan medoxomil                              |
| Edarbi 80mg tablets (Takeda UK Ltd)                      | 7755341000033112  | 20351811000001102 | Azilsartan medoxomil                              |
| Azilsartan medoxomil 20mg tablets                        | 7754841000033119  | 20418711000001104 | Azilsartan medoxomil                              |
| Edarbi 20mg tablets (Takeda UK Ltd)                      | 7755141000033114  | 20350911000001100 | Azilsartan medoxomil                              |
| Bendroflumethiazide 2.5mg tablets                        | 3083141000033112  | 317919004         | Bendroflumethiazide                               |
| Urizide 2.5mg tablets (Dr Reddy's Laboratories (UK) Ltd) | 2955941000033119  | 485311000001101   | Bendroflumethiazide                               |
| Aprinox 2.5mg tablets (Advanz Pharma)                    | 74541000033119    | 672111000001100   | Bendroflumethiazide                               |
| Neo-Naclex 2.5mg tablets (Advanz Pharma)                 | 6045641000033115  | 18149011000001101 | Bendroflumethiazide                               |
| Urizide 5mg tablets (Dr Reddy's Laboratories (UK) Ltd)   | 1495441000033116  | 898211000001109   | Bendroflumethiazide                               |
| Neo-Naclex 5mg tablets (Mercury Pharma Group Ltd)        | 965341000033114   | 817911000001100   | Bendroflumethiazide                               |
| Aprinox 5mg tablets (Amdipharm Plc)                      | 74641000033118    | 120911000001103   | Bendroflumethiazide                               |
| Bendroflumethiazide 5mg tablets                          | 3083241000033117  | 317920005         | Bendroflumethiazide                               |
| Corgaretic 40mg tablets (Sanofi-Synthelabo Ltd)          | 375441000033118   | 3886211000001102  | Bendroflumethiazide/<br>Nadolol                   |
| Corgaretic 80mg tablets (Sanofi-Synthelabo Ltd)          | 375541000033117   | 4057911000001102  | Bendroflumethiazide/<br>Nadolol                   |
| Prestim tablets (Meda Pharmaceuticals Ltd)               | 1132741000033111  | 98411000001109    | Bendroflumethiazide/<br>Timolol maleate           |
| Timolol 10mg / Bendroflumethiazide 2.5mg tablets         | 3346641000033118  | 318556002         | Bendroflumethiazide/<br>Timolol maleate           |
| Tenben 25mg/1.25mg capsules (Galen Ltd)                  | 1414241000033117  | 721411000001106   | Atenolol/<br>Bendroflumethiazide                  |
| Inderetic 80mg/2.5mg capsules (AstraZeneca UK Ltd)       | 756641000033114   | 333111000001104   | Bendroflumethiazide/<br>Propranolol hydrochloride |

|                                                                                                   |                  |                   |                                                |
|---------------------------------------------------------------------------------------------------|------------------|-------------------|------------------------------------------------|
| Bendroflumethiazide 5mg/5ml oral suspension                                                       | 5401741000033110 | 8306711000001109  | Bendroflumethiazide                            |
| Bendroflumethiazide 2.5mg/5ml oral suspension                                                     | 3151841000033117 | 8306811000001101  | Bendroflumethiazide                            |
| Bendroflumethiazide 1.25mg/5ml oral suspension                                                    | 5453941000033119 | 8307011000001105  | Bendroflumethiazide                            |
| Centyl K modified-release tablets (LEO Pharma)                                                    | 234841000033110  | 3932711000001105  | Bendroflumethiazide/ Potassium chloride        |
| Bendroflumethiazide 2.5mg / Potassium chloride 573mg (potassium 7.7mmol) modified-release tablets | 3161041000033115 | 35910011000001105 | Bendroflumethiazide/ Potassium chloride        |
| Neo-Naclex-K modified-release tablets (Mercury Pharma Group Ltd)                                  | 967041000033118  | 3638211000001100  | Bendroflumethiazide/ Potassium chloride        |
| Bendroflumethiazide 2.5mg / Potassium chloride 630mg (potassium 8.4mmol) modified-release tablets | 3162841000033118 | 35910111000001106 | Bendroflumethiazide/ Potassium chloride        |
| Inderex 160mg/5mg modified-release capsules (AstraZeneca UK Ltd)                                  | 756741000033117  | 350811000001100   | Bendroflumethiazide/ Propranolol hydrochloride |
| Amias 2mg tablets (Takeda UK Ltd)                                                                 | 59241000033118   | 97311000001103    | Candesartan cilexetil                          |
| Candesartan 2mg tablets                                                                           | 211641000033118  | 318977009         | Candesartan cilexetil                          |
| Candesartan 4mg tablets                                                                           | 211741000033110  | 318978004         | Candesartan cilexetil                          |
| Amias 4mg tablets (Takeda UK Ltd)                                                                 | 59341000033111   | 857411000001100   | Candesartan cilexetil                          |
| Amias 8mg tablets (Takeda UK Ltd)                                                                 | 59441000033117   | 36011000001106    | Candesartan cilexetil                          |
| Candesartan 8mg tablets                                                                           | 211841000033117  | 318979007         | Candesartan cilexetil                          |
| Candesartan 16mg tablets                                                                          | 211541000033119  | 318980005         | Candesartan cilexetil                          |
| Amias 16mg tablets (Takeda UK Ltd)                                                                | 59141000033113   | 908511000001100   | Candesartan cilexetil                          |
| Candesartan 32mg tablets                                                                          | 3227241000033111 | 376998003         | Candesartan cilexetil                          |
| Amias 32mg tablets (Takeda UK Ltd)                                                                | 3227341000033118 | 8983911000001107  | Candesartan cilexetil                          |
| Capozide LS 12.5mg/25mg tablets (Bristol-Myers Squibb Pharmaceuticals Ltd)                        | 209241000033119  | 546711000001107   | Captopril/ Hydrochlorothiazide                 |
| Co-zidocapt 12.5mg/25mg tablets                                                                   | 1893141000033119 | 318806002         | Captopril/ Hydrochlorothiazide                 |
| Co-zidocapt 25mg/50mg tablets                                                                     | 1893241000033114 | 318807006         | Captopril/ Hydrochlorothiazide                 |
| Acezide 25mg/50mg tablets (Bristol-Myers Squibb Pharmaceuticals Ltd)                              | 13141000033119   | 263311000001101   | Captopril/ Hydrochlorothiazide                 |
| Capozide 25mg/50mg tablets (Bristol-Myers Squibb Pharmaceuticals Ltd)                             | 216441000033110  | 17311000001102    | Captopril/ Hydrochlorothiazide                 |
| Capoten 12.5mg tablets (Bristol-Myers Squibb Pharmaceuticals Ltd)                                 | 214141000033113  | 134511000001103   | Captopril                                      |
| Ecopace 12.5mg tablets (Advanz Pharma)                                                            | 2945841000033112 | 221411000001104   | Captopril                                      |
| Acepril 12.5mg tablets (Bristol-Myers Squibb Pharmaceuticals Ltd)                                 | 10841000033119   | 660111000001107   | Captopril                                      |
| Tensopril 12.5mg tablets (Teva UK Ltd)                                                            | 2928341000033114 | 673711000001107   | Captopril                                      |

|                                                                 |                  |                   |                                           |
|-----------------------------------------------------------------|------------------|-------------------|-------------------------------------------|
| Kaplon 12.5mg tablets (Teva UK Ltd)                             | 1622041000033110 | 777711000001105   | Captopril                                 |
| Captopril 12.5mg tablets                                        | 213441000033119  | 318820009         | Captopril                                 |
| Captopril 25mg tablets                                          | 214441000033117  | 318821008         | Captopril                                 |
| Ecopace 25mg tablets (Advanz Pharma)                            | 2945941000033116 | 817411000001108   | Captopril                                 |
| Acepril 25mg tablets (Bristol-Myers Squibb Pharmaceuticals Ltd) | 10941000033110   | 517711000001103   | Captopril                                 |
| Kaplon 25mg tablets (Teva UK Ltd)                               | 1622141000033114 | 477111000001100   | Captopril                                 |
| Tensopril 25mg tablets (Teva UK Ltd)                            | 2928441000033115 | 597511000001109   | Captopril                                 |
| Capoten 25mg tablets (Bristol-Myers Squibb Pharmaceuticals Ltd) | 214241000033118  | 455611000001103   | Captopril                                 |
| Capoten 50mg tablets (Bristol-Myers Squibb Pharmaceuticals Ltd) | 214341000033111  | 386611000001109   | Captopril                                 |
| Kaplon 50mg tablets (Teva UK Ltd)                               | 1622241000033119 | 572511000001102   | Captopril                                 |
| Acepril 50mg tablets (Bristol-Myers Squibb Pharmaceuticals Ltd) | 11041000033117   | 814111000001108   | Captopril                                 |
| Ecopace 50mg tablets (Advanz Pharma)                            | 2946041000033114 | 767911000001101   | Captopril                                 |
| Tensopril 50mg tablets (Teva UK Ltd)                            | 2928541000033119 | 653111000001108   | Captopril                                 |
| Captopril 50mg tablets                                          | 214541000033116  | 318824000         | Captopril                                 |
| Captopril 10mg/5ml oral suspension                              | 5008141000033111 | 8346811000001109  | Captopril                                 |
| Captopril 12.5mg/5ml oral solution                              | 5898741000033114 | 8347111000001104  | Captopril                                 |
| Captopril 12.5mg/5ml oral suspension                            | 5898841000033116 | 8347211000001105  | Captopril                                 |
| Captopril 15mg/5ml oral suspension                              | 5401641000033118 | 8347411000001109  | Captopril                                 |
| Captopril 20mg/5ml oral suspension                              | 2719841000033113 | 8348311000001101  | Captopril                                 |
| Captopril 25mg/5ml oral solution                                | 3012741000033115 | 8348511000001107  | Captopril                                 |
| Captopril 25mg/5ml oral suspension                              | 5132041000033112 | 8348611000001106  | Captopril                                 |
| Captopril 3mg/5ml oral solution                                 | 3851341000033117 | 8350511000001107  | Captopril                                 |
| Captopril 5mg/5ml oral solution                                 | 6001041000033115 | 8351611000001101  | Captopril                                 |
| Captopril 5mg/5ml oral suspension                               | 2656341000033110 | 8351811000001102  | Captopril                                 |
| Captopril 6.25mg/5ml oral solution                              | 5898941000033112 | 8351911000001107  | Captopril                                 |
| Captopril 6.25mg/5ml oral suspension                            | 5899041000033115 | 8352011000001100  | Captopril                                 |
| Captopril 2mg capsules                                          | 3940841000033110 | 8791811000001109  | Captopril                                 |
| Captopril 4mg capsules                                          | 5454041000033117 | 8791911000001104  | Captopril                                 |
| Captopril 8mg/5ml oral suspension                               | 3333941000033117 | 19820711000001101 | Captopril                                 |
| Noyada 25mg/5ml oral solution (Martindale Pharmaceuticals Ltd)  | 8961341000033119 | 23681711000001107 | Captopril                                 |
| Captopril 25mg/5ml oral solution sugar free                     | 9108041000033111 | 23707311000001108 | Captopril                                 |
| Noyada 5mg/5ml oral solution (Martindale Pharmaceuticals Ltd)   | 8961241000033112 | 23682011000001102 | Captopril                                 |
| Captopril 5mg/5ml oral solution sugar free                      | 9108141000033110 | 23707511000001102 | Captopril                                 |
| Irbesartan 300mg / Hydrochlorothiazide 12.5mg tablets           | 3161241000033111 | 134460003         | Hydrochlorothiazid e/ Irbesartan          |
| CoAprovel 300mg/12.5mg tablets (Sanofi)                         | 2216241000033110 | 682711000001109   | Hydrochlorothiazid e/ Irbesartan          |
| CoAprovel 150mg/12.5mg tablets (Sanofi)                         | 2216141000033115 | 792411000001108   | Hydrochlorothiazid e/ Irbesartan          |
| Irbesartan 150mg / Hydrochlorothiazide 12.5mg tablets           | 3161141000033116 | 134461004         | Hydrochlorothiazid e/ Irbesartan          |
| Co-Betaloc tablets (Pfizer Ltd)                                 | 372741000033116  | 2977611000001106  | Hydrochlorothiazid e/ Metoprolol tartrate |

|                                                            |                   |                   |                                                |
|------------------------------------------------------------|-------------------|-------------------|------------------------------------------------|
| Metoprolol 100mg / Hydrochlorothiazide 12.5mg tablets      | 3161341000033118  | 318546001         | Hydrochlorothiazide / Metoprolol tartrate      |
| Secadrex 200mg/12.5mg tablets (Sanofi)                     | 1274641000033111  | 878911000001106   | Acebutolol hydrochloride / Hydrochlorothiazide |
| Acebutolol 200mg / Hydrochlorothiazide 12.5mg tablets      | 3162941000033114  | 318586009         | Acebutolol hydrochloride / Hydrochlorothiazide |
| Monozide 10 tablets (Wyeth Pharmaceuticals)                | 937341000033111   | 4542911000001104  | Bisoprolol fumarate / Hydrochlorothiazide      |
| Enalapril 20mg / Hydrochlorothiazide 12.5mg tablets        | 3162241000033117  | 318849001         | Enalapril maleate / Hydrochlorothiazide        |
| Innozide 20mg/12.5mg tablets (Merck Sharp & Dohme Ltd)     | 770141000033115   | 146811000001108   | Enalapril maleate / Hydrochlorothiazide        |
| Zestoretic 20 tablets (AstraZeneca UK Ltd)                 | 1552341000033118  | 3143111000001100  | Hydrochlorothiazide / Lisinopril               |
| Carace 20 Plus tablets (Merck Sharp & Dohme Ltd)           | 217041000033116   | 3143511000001109  | Hydrochlorothiazide / Lisinopril               |
| Caralpa 20mg/12.5mg tablets (Actavis UK Ltd)               | 3136141000033118  | 7385711000001106  | Hydrochlorothiazide / Lisinopril               |
| Lisicostad 20mg/12.5mg tablets (Genus Pharmaceuticals Ltd) | 3279641000033119  | 8145911000001100  | Hydrochlorothiazide / Lisinopril               |
| Lisinopril 20mg / Hydrochlorothiazide 12.5mg tablets       | 3160941000033113  | 318880006         | Hydrochlorothiazide / Lisinopril               |
| Lisoretic 20mg/12.5mg tablets (Bristol Laboratories Ltd)   | 13443541000033119 | 38240011000001105 | Hydrochlorothiazide / Lisinopril               |
| Lisinopril 10mg / Hydrochlorothiazide 12.5mg tablets       | 3160841000033117  | 318884002         | Hydrochlorothiazide / Lisinopril               |
| Caralpa 10mg/12.5mg tablets (Actavis UK Ltd)               | 3136041000033117  | 7385911000001108  | Hydrochlorothiazide / Lisinopril               |
| Lisicostad 10mg/12.5mg tablets (Genus Pharmaceuticals Ltd) | 3279541000033115  | 8145711000001102  | Hydrochlorothiazide / Lisinopril               |
| Zestoretic 10 tablets (AstraZeneca UK Ltd)                 | 1551841000033118  | 3144311000001101  | Hydrochlorothiazide / Lisinopril               |
| Carace 10 Plus tablets (Merck Sharp & Dohme Ltd)           | 209841000033115   | 3144511000001107  | Hydrochlorothiazide / Lisinopril               |
| Lisoretic 10mg/12.5mg tablets (Bristol Laboratories Ltd)   | 13443441000033115 | 38240211000001100 | Hydrochlorothiazide / Lisinopril               |
| Quinapril 10mg / Hydrochlorothiazide 12.5mg tablets        | 3160641000033118  | 318892006         | Hydrochlorothiazide / Quinapril hydrochloride  |
| Accuretic 10mg/12.5mg tablets (Pfizer Ltd)                 | 11241000033113    | 260211000001104   | Hydrochlorothiazide / Quinapril hydrochloride  |
| Losartan 50mg / Hydrochlorothiazide 12.5mg tablets         | 3161741000033117  | 318959004         | Hydrochlorothiazide / Losartan potassium       |
| Cozaar-Comp 50mg/12.5mg tablets (Merck Sharp & Dohme Ltd)  | 370841000033110   | 255911000001105   | Hydrochlorothiazide / Losartan potassium       |
| Hydrochlorothiazide 25mg tablets                           | 744941000033110   | 376209006         | Hydrochlorothiazide                            |
| Hydrosaluric 25mg tablets (Merck Sharp & Dohme Ltd)        | 742541000033112   | 4544011000001109  | Hydrochlorothiazide                            |
| Hydrochlorothiazide 50mg tablets                           | 745441000033118   | 376508004         | Hydrochlorothiazide                            |

|                                                                  |                  |                   |                                            |
|------------------------------------------------------------------|------------------|-------------------|--------------------------------------------|
| Hydrosaluric 50mg tablets (Merck Sharp & Dohme Ltd)              | 742641000033113  | 4546211000001109  | Hydrochlorothiazid e                       |
| Co-Diovan 80mg/12.5mg tablets (Novartis Pharmaceuticals UK Ltd)  | 3190841000033119 | 8150111000001108  | Hydrochlorothiazid e/ Valsartan            |
| Valsartan 80mg / Hydrochlorothiazide 12.5mg tablets              | 3190741000033112 | 377488008         | Hydrochlorothiazid e/ Valsartan            |
| Cozaar-Comp 100mg/25mg tablets (Merck Sharp & Dohme Ltd)         | 3346941000033113 | 9566911000001105  | Hydrochlorothiazid e/ Losartan potassium   |
| Losartan 100mg / Hydrochlorothiazide 25mg tablets                | 3346841000033117 | 395497004         | Hydrochlorothiazid e/ Losartan potassium   |
| Chlorothiazide 250mg tablets                                     | 5093641000033110 | 395516007         | Chlorothiazide                             |
| Valsartan 160mg / Hydrochlorothiazide 12.5mg tablets             | 3161441000033112 | 395521005         | Hydrochlorothiazid e/ Valsartan            |
| Co-Diovan 160mg/12.5mg tablets (Novartis Pharmaceuticals UK Ltd) | 3152541000033112 | 7668611000001104  | Hydrochlorothiazid e/ Valsartan            |
| Telmisartan 40mg / Hydrochlorothiazide 12.5mg tablets            | 3162641000033119 | 407855002         | Hydrochlorothiazid e/ Telmisartan          |
| MicardisPlus 40mg/12.5mg tablets (Boehringer Ingelheim Ltd)      | 2864241000033110 | 3806311000001109  | Hydrochlorothiazid e/ Telmisartan          |
| Tolucombi 40mg/12.5mg tablets (Consilient Health Ltd)            | 9292641000033116 | 24573211000001101 | Hydrochlorothiazid e/ Telmisartan          |
| Actelsar HCT 40mg/12.5mg tablets (Actavis UK Ltd)                | 9159341000033112 | 24411411000001100 | Hydrochlorothiazid e/ Telmisartan          |
| MicardisPlus 80mg/12.5mg tablets (Boehringer Ingelheim Ltd)      | 2864341000033117 | 3806911000001105  | Hydrochlorothiazid e/ Telmisartan          |
| Telmisartan 80mg / Hydrochlorothiazide 12.5mg tablets            | 3162741000033111 | 407856001         | Hydrochlorothiazid e/ Telmisartan          |
| Actelsar HCT 80mg/12.5mg tablets (Actavis UK Ltd)                | 9159441000033118 | 24412511000001109 | Hydrochlorothiazid e/ Telmisartan          |
| Tolucombi 80mg/12.5mg tablets (Consilient Health Ltd)            | 9292741000033113 | 24573411000001102 | Hydrochlorothiazid e/ Telmisartan          |
| Chlorothiazide 250mg/5ml oral suspension                         | 246241000033116  | 408039005         | Chlorothiazide                             |
| Olmotec Plus 20mg/12.5mg tablets (Daiichi Sankyo UK Ltd)         | 3909141000033116 | 10261511000001103 | Hydrochlorothiazid e/ Olmesartan medoxomil |
| Olmesartan medoxomil 20mg / Hydrochlorothiazide 12.5mg tablets   | 3908941000033112 | 409184002         | Hydrochlorothiazid e/ Olmesartan medoxomil |
| Olmesartan medoxomil 40mg / Hydrochlorothiazide 12.5mg tablets   | 5566341000033111 | 409185001         | Hydrochlorothiazid e/ Olmesartan medoxomil |
| Olmotec Plus 40mg/12.5mg tablets (Daiichi Sankyo UK Ltd)         | 5566441000033117 | 17220911000001102 | Hydrochlorothiazid e/ Olmesartan medoxomil |
| Valsartan 160mg / Hydrochlorothiazide 25mg tablets               | 3161541000033113 | 409298002         | Hydrochlorothiazid e/ Valsartan            |
| Co-Diovan 160mg/25mg tablets (Novartis Pharmaceuticals UK Ltd)   | 3152641000033113 | 7668911000001105  | Hydrochlorothiazid e/ Valsartan            |
| Co-triamterzide 50mg/25mg tablets                                | 370241000033111  | 410896007         | Hydrochlorothiazid e/ Triamterene          |
| Triamaxco 50mg/25mg tablets (Ashbourne Pharmaceuticals Ltd)      | 1468141000033118 | 721311000001104   | Hydrochlorothiazid e/ Triamterene          |
| Dyazide 50mg/25mg tablets (Advanz Pharma)                        | 492341000033115  | 132811000001106   | Hydrochlorothiazid e/ Triamterene          |
| Triam-Co 50mg/25mg tablets (IVAX Pharmaceuticals UK Ltd)         | 1470341000033112 | 191211000001106   | Hydrochlorothiazid e/ Triamterene          |
| Chlorothiazide 150mg/5ml oral suspension                         | 5899341000033118 | 8358511000001105  | Chlorothiazide                             |
| Chlorothiazide 25mg/5ml oral suspension                          | 5899441000033112 | 8358711000001100  | Chlorothiazide                             |

|                                                              |                  |                   |                                            |
|--------------------------------------------------------------|------------------|-------------------|--------------------------------------------|
| Hydrochlorothiazide 50mg/5ml oral solution                   | 2746441000033111 | 8529611000001101  | Hydrochlorothiazide                        |
| Olmesartan medoxomil 20mg / Hydrochlorothiazide 25mg tablets | 3909041000033115 | 10270711000001105 | Hydrochlorothiazide / Olmesartan medoxomil |
| Olmotec Plus 20mg/25mg tablets (Daiichi Sankyo UK Ltd)       | 3909241000033111 | 10261811000001100 | Hydrochlorothiazide / Olmesartan medoxomil |
| Irbesartan 300mg / Hydrochlorothiazide 25mg tablets          | 3995241000033112 | 10970311000001105 | Hydrochlorothiazide / Irbesartan           |
| CoAprovel 300mg/25mg tablets (Sanofi)                        | 3995341000033119 | 10968611000001106 | Hydrochlorothiazide / Irbesartan           |
| Chlorothiazide 200mg/5ml oral suspension                     | 3924141000033111 | 12502311000001102 | Chlorothiazide                             |
| Chlorothiazide 250mg/5ml oral solution                       | 5991141000033110 | 12503011000001109 | Chlorothiazide                             |
| Hydrochlorothiazide 5mg/5ml oral solution                    | 5969841000033119 | 12538711000001107 | Hydrochlorothiazide                        |
| Hydrochlorothiazide 5mg/5ml oral suspension                  | 5969941000033110 | 12538811000001104 | Hydrochlorothiazide                        |
| Losartan 100mg / Hydrochlorothiazide 12.5mg tablets          | 4424741000033110 | 13112711000001103 | Hydrochlorothiazide / Losartan potassium   |
| Cozaar-Comp 100mg/12.5mg tablets (Merck Sharp & Dohme Ltd)   | 4424841000033117 | 13094111000001102 | Hydrochlorothiazide / Losartan potassium   |
| MicardisPlus 80mg/25mg tablets (Boehringer Ingelheim Ltd)    | 4548841000033118 | 13719711000001103 | Hydrochlorothiazide / Telmisartan          |
| Telmisartan 80mg / Hydrochlorothiazide 25mg tablets          | 4548741000033111 | 13731911000001109 | Hydrochlorothiazide / Telmisartan          |
| Actelsar HCT 80mg/25mg tablets (Accord Healthcare Ltd)       | 9159541000033117 | 24413611000001103 | Hydrochlorothiazide / Telmisartan          |
| Tolucombi 80mg/25mg tablets (Consilient Health Ltd)          | 9292841000033115 | 24573611000001104 | Hydrochlorothiazide / Telmisartan          |
| Spironolactone 3mg / Chlorothiazide 30mg capsules            | 9278541000033112 | 16072811000001103 | Chlorothiazide / Spironolactone            |
| Spironolactone 4mg / Chlorothiazide 40mg capsules            | 7681541000033117 | 18520511000001107 | Chlorothiazide / Spironolactone            |
| Co-Betaloc SA tablets (Pfizer Ltd)                           | 372841000033114  | 3853411000001104  | Hydrochlorothiazide / Metoprolol tartrate  |
| Chlortalidone 50mg tablets                                   | 3086241000033111 | 317935006         | Chlortalidone                              |
| Hygroton 50mg tablets (Alliance Pharmaceuticals Ltd)         | 742841000033114  | 285911000001101   | Chlortalidone                              |
| Cilazapril 500microgram tablets                              | 258441000033119  | 318915008         | Cilazapril monohydrate                     |
| Vasace 500microgram tablets (Roche Products Ltd)             | 1504941000033117 | 3740211000001108  | Cilazapril monohydrate                     |
| Vasace 1mg tablets (Roche Products Ltd)                      | 1504641000033112 | 3669711000001105  | Cilazapril monohydrate                     |
| Cilazapril 1mg tablets                                       | 258141000033110  | 318916009         | Cilazapril monohydrate                     |
| Cilazapril 2.5mg tablets                                     | 258241000033115  | 318917000         | Cilazapril monohydrate                     |
| Vasace 2.5mg tablets (Roche Products Ltd)                    | 1504741000033115 | 3672411000001101  | Cilazapril monohydrate                     |
| Vasace 5mg tablets (Roche Products Ltd)                      | 1503441000033113 | 3671311000001104  | Cilazapril monohydrate                     |
| Cilazapril 5mg tablets                                       | 258641000033117  | 318923005         | Cilazapril monohydrate                     |
| Catapres 100microgram tablets (Boehringer Ingelheim Ltd)     | 215341000033112  | 215111000001101   | Clonidine hydrochloride                    |
| Clonidine 100microgram tablets                               | 285841000033118  | 318667005         | Clonidine hydrochloride                    |

|                                                                                       |                   |                   |                                            |
|---------------------------------------------------------------------------------------|-------------------|-------------------|--------------------------------------------|
| Clonidine 300microgram tablets                                                        | 287241000033110   | 318668000         | Clonidine hydrochloride                    |
| Catapres 300microgram tablets (Boehringer Ingelheim Ltd)                              | 215441000033118   | 368711000001103   | Clonidine hydrochloride                    |
| Dixarit 25microgram tablets (Boehringer Ingelheim Ltd)                                | 464341000033111   | 344511000001105   | Clonidine hydrochloride                    |
| Clonidine 25microgram tablets                                                         | 285941000033114   | 322840006         | Clonidine hydrochloride                    |
| Clonidine 50micrograms/5ml oral solution                                              | 5900141000033118  | 8398511000001100  | Clonidine hydrochloride                    |
| Clonidine 50micrograms/5ml oral suspension                                            | 5900241000033113  | 8398611000001101  | Clonidine hydrochloride                    |
| Clonidine 100micrograms/5ml oral suspension                                           | 12569041000033115 | 11813011000001109 | Clonidine hydrochloride                    |
| Catapres 150micrograms/1ml solution for injection ampoules (Boehringer Ingelheim Ltd) | 196241000033111   | 364911000001108   | Clonidine hydrochloride                    |
| Clonidine 150micrograms/1ml solution for injection ampoules                           | 275641000033110   | 36089211000001103 | Clonidine hydrochloride                    |
| Clonidine 250microgram modified-release capsules                                      | 261841000033118   | 36089511000001100 | Clonidine hydrochloride                    |
| Clonidine 50micrograms/5ml oral solution sugar free                                   | 12684041000033114 | 36392711000001102 | Clonidine hydrochloride                    |
| Aldactide 25 tablets (Pfizer Ltd)                                                     | 40241000033110    | 762511000001105   | Hydroflumethiazide/ Spironolactone         |
| Co-flumactone 25mg/25mg tablets                                                       | 377041000033116   | 318127005         | Hydroflumethiazide/ Spironolactone         |
| Co-flumactone 50mg/50mg tablets                                                       | 377141000033117   | 318128000         | Hydroflumethiazide/ Spironolactone         |
| Aldactide 50 tablets (Pfizer Ltd)                                                     | 40341000033117    | 4669111000001107  | Hydroflumethiazide/ Spironolactone         |
| Dytac 50mg capsules (Advanz Pharma)                                                   | 491641000033116   | 3907911000001100  | Triamterene                                |
| Triamterene 50mg capsules                                                             | 1455341000033115  | 318082004         | Triamterene                                |
| Triamterene 50mg / Benzthiazide 25mg capsules                                         | 3161941000033119  | 318098006         | Benzthiazide/ Triamterene                  |
| Dytide capsules (Mercury Pharma Group Ltd)                                            | 491741000033113   | 714911000001108   | Benzthiazide/ Triamterene                  |
| Kalspare tablets (DHP Healthcare Ltd)                                                 | 796541000033115   | 3252011000001105  | Chlortalidone/ Triamterene                 |
| Triamterene 50mg / Chlortalidone 50mg tablets                                         | 3162341000033110  | 318100006         | Chlortalidone/ Triamterene                 |
| Triamterene 50mg / Furosemide 40mg tablets                                            | 3092741000033119  | 318101005         | Furosemide/ Triamterene                    |
| Frusene 50mg/40mg tablets (Orion Pharma (UK) Ltd)                                     | 615041000033112   | 25411000001108    | Furosemide/ Triamterene                    |
| Navidrex 500microgram tablets (Advanz Pharma)                                         | 955441000033111   | 487811000001100   | Cyclopenthiazide                           |
| Cyclopenthiazide 500microgram tablets                                                 | 395041000033117   | 317940003         | Cyclopenthiazide                           |
| Trasidrex modified-release tablets (Mercury Pharma Group Ltd)                         | 1469941000033114  | 3444411000001107  | Cyclopenthiazide/ Oxprenolol hydrochloride |
| Co-prenozide 160mg/0.25mg modified-release tablets                                    | 377341000033119   | 36091611000001101 | Cyclopenthiazide/ Oxprenolol hydrochloride |
| Pralenal 2.5 tablets (Opus Pharmaceuticals Ltd)                                       | 1918641000033112  | 448611000001106   | Enalapril maleate                          |
| Innovace 2.5mg tablets (Merck Sharp & Dohme Ltd)                                      | 769141000033117   | 749611000001107   | Enalapril maleate                          |
| Enalapril 2.5mg tablets                                                               | 523541000033115   | 318850001         | Enalapril maleate                          |
| Enalapril 5mg tablets                                                                 | 522841000033111   | 318851002         | Enalapril maleate                          |
| Innovace 5mg tablets (Merck Sharp & Dohme Ltd)                                        | 769341000033119   | 730211000001104   | Enalapril maleate                          |
| Pralenal 5 tablets (Opus Pharmaceuticals Ltd)                                         | 1918741000033115  | 578511000001100   | Enalapril maleate                          |

|                                                             |                  |                   |                         |
|-------------------------------------------------------------|------------------|-------------------|-------------------------|
| Innovace 10mg tablets (Merck Sharp & Dohme Ltd)             | 769041000033116  | 316111000001104   | Enalapril maleate       |
| Pralenal 10 tablets (Opus Pharmaceuticals Ltd)              | 1918841000033113 | 761411000001101   | Enalapril maleate       |
| Enalapril 10mg tablets                                      | 522641000033110  | 318853004         | Enalapril maleate       |
| Enalapril 20mg tablets                                      | 522741000033118  | 318855006         | Enalapril maleate       |
| Pralenal 20 tablets (Opus Pharmaceuticals Ltd)              | 1918941000033117 | 508511000001105   | Enalapril maleate       |
| Innovace 20mg tablets (Merck Sharp & Dohme Ltd)             | 769241000033112  | 302311000001104   | Enalapril maleate       |
| Enalapril 1.25mg/5ml oral solution                          | 6012441000033118 | 8485511000001103  | Enalapril maleate       |
| Enalapril 1.25mg/5ml oral suspension                        | 6012541000033117 | 8485611000001104  | Enalapril maleate       |
| Enalapril 10mg/5ml oral solution                            | 5967041000033117 | 8485711000001108  | Enalapril maleate       |
| Enalapril 10mg/5ml oral suspension                          | 5967141000033118 | 8485811000001100  | Enalapril maleate       |
| Enalapril 5mg/5ml oral solution                             | 5992541000033111 | 8486911000001103  | Enalapril maleate       |
| Enalapril 5mg/5ml oral suspension                           | 5992641000033112 | 8487011000001104  | Enalapril maleate       |
| Enalapril 5mg/5ml oral suspension sugar free                | 3279241000033117 | 20092911000001108 | Enalapril maleate       |
| Inspra 25mg tablets (Upjohn UK Ltd)                         | 3199041000033116 | 8477211000001104  | Eplerenone              |
| Eplerenone 25mg tablets                                     | 3198841000033117 | 407011007         | Eplerenone              |
| Eplerenone 50mg tablets                                     | 3198941000033113 | 407012000         | Eplerenone              |
| Inspra 50mg tablets (Upjohn UK Ltd)                         | 3199141000033117 | 8479811000001106  | Eplerenone              |
| Teveten 300mg tablets (Mylan)                               | 2040841000033113 | 401211000001105   | Eprosartan mesilate     |
| Eprosartan 300mg tablets                                    | 2036341000033115 | 318994006         | Eprosartan mesilate     |
| Eprosartan 400mg tablets                                    | 2036441000033114 | 318995007         | Eprosartan mesilate     |
| Teveten 400mg tablets (Abbott Healthcare Products Ltd)      | 2040941000033117 | 151411000001103   | Eprosartan mesilate     |
| Teveten 600mg tablets (Mylan)                               | 2041041000033110 | 872011000001109   | Eprosartan mesilate     |
| Eprosartan 600mg tablets                                    | 2036541000033110 | 318996008         | Eprosartan mesilate     |
| Felodipine 2.5mg modified-release / Ramipril 2.5mg tablets  | 3163341000033119 | 318176004         | Felodipine/<br>Ramipril |
| Triapin 2.5mg/2.5mg modified-release tablets (Sanofi)       | 8264941000033119 | 4093211000001109  | Felodipine/<br>Ramipril |
| Triapin 5mg/5mg modified-release tablets (Sanofi)           | 1834341000033110 | 3887911000001109  | Felodipine/<br>Ramipril |
| Felodipine 5mg modified-release / Ramipril 5mg tablets      | 3163241000033112 | 318177008         | Felodipine/<br>Ramipril |
| Plendil 2.5mg modified-release tablets (AstraZeneca UK Ltd) | 1093941000033116 | 562711000001104   | Felodipine              |
| Cabren 2.5mg modified-release tablets (Teva UK Ltd)         | 2928841000033117 | 3800311000001106  | Felodipine              |
| Neofel XL 2.5mg tablets (Actavis UK Ltd)                    | 4521541000033113 | 18167311000001103 | Felodipine              |
| Felotens XL 2.5mg tablets (Thornton & Ross Ltd)             | 4429241000033115 | 13127311000001107 | Felodipine              |
| Folpik XL 2.5mg tablets (Teva UK Ltd)                       | 5576441000033112 | 13565311000001101 | Felodipine              |
| Cardioplén XL 2.5mg tablets (Chiesi Ltd)                    | 4152841000033112 | 11506711000001103 | Felodipine              |
| Felodipine 2.5mg modified-release tablets                   | 568041000033111  | 39020311000001104 | Felodipine              |
| Parmid XL 2.5mg tablets (Sandoz Ltd)                        | 9121541000033117 | 24221811000001105 | Felodipine              |
| Plendil 10mg modified-release tablets (AstraZeneca UK Ltd)  | 1094041000033119 | 48511000001101    | Felodipine              |
| Cabren 10mg modified-release tablets (Teva UK Ltd)          | 2929041000033116 | 3800711000001105  | Felodipine              |
| Felogen XL 10mg tablets (Mylan)                             | 3177541000033111 | 4973011000001100  | Felodipine              |
| Folpik XL 10mg tablets (Teva UK Ltd)                        | 5576341000033118 | 5008911000001100  | Felodipine              |



|                                                                            |                   |                   |                           |
|----------------------------------------------------------------------------|-------------------|-------------------|---------------------------|
| Felotens XL 10mg tablets (Thornton & Ross Ltd)                             | 2980041000033115  | 4785511000001107  | Felodipine                |
| Vascalpha 10mg modified-release tablets (Accord Healthcare Ltd)            | 3034441000033111  | 5638811000001106  | Felodipine                |
| Parmid XL 10mg tablets (Sandoz Ltd)                                        | 9121741000033113  | 7388311000001103  | Felodipine                |
| Neofel XL 10mg tablets (Kent Pharmaceuticals Ltd)                          | 4521741000033117  | 8089811000001107  | Felodipine                |
| Cardioplen XL 10mg tablets (Chiesi Ltd)                                    | 3154941000033110  | 7887511000001107  | Felodipine                |
| Felodipine 10mg modified-release tablets                                   | 569041000033115   | 39020511000001105 | Felodipine                |
| Cardioplen XL 5mg tablets (Chiesi Ltd)                                     | 3154841000033119  | 7887011000001104  | Felodipine                |
| Neofel XL 5mg tablets (Kent Pharmaceuticals Ltd)                           | 4521641000033114  | 8090111000001106  | Felodipine                |
| Parmid XL 5mg tablets (Sandoz Ltd)                                         | 9121641000033116  | 7387911000001103  | Felodipine                |
| Vascalpha 5mg modified-release tablets (Accord Healthcare Ltd)             | 3034341000033117  | 5638311000001102  | Felodipine                |
| Felotens XL 5mg tablets (Thornton & Ross Ltd)                              | 2979941000033119  | 4785111000001103  | Felodipine                |
| Folpik XL 5mg tablets (Teva UK Ltd)                                        | 5576541000033113  | 5008511000001107  | Felodipine                |
| Felogen XL 5mg tablets (Mylan)                                             | 3177441000033110  | 4972811000001103  | Felodipine                |
| Cabren 5mg modified-release tablets (Teva UK Ltd)                          | 2928941000033113  | 3800511000001100  | Felodipine                |
| Plendil 5mg modified-release tablets (AstraZeneca UK Ltd)                  | 1094141000033115  | 490211000001101   | Felodipine                |
| Felodipine 5mg modified-release tablets                                    | 569141000033116   | 39020611000001109 | Felodipine                |
| Fosinopril 10mg tablets                                                    | 609141000033111   | 318909008         | Fosinopril sodium         |
| Staril 10mg tablets (Bristol-Myers Squibb Pharmaceuticals Ltd)             | 1387341000033114  | 462511000001104   | Fosinopril sodium         |
| Staril 20mg tablets (Bristol-Myers Squibb Pharmaceuticals Ltd)             | 1387441000033115  | 348111000001107   | Fosinopril sodium         |
| Fosinopril 20mg tablets                                                    | 609241000033116   | 318910003         | Fosinopril sodium         |
| Hydralazine 25mg tablets                                                   | 741941000033113   | 318649003         | Hydralazine hydrochloride |
| Apresoline 25mg tablets (Advanz Pharma)                                    | 74341000033114    | 657011000001101   | Hydralazine hydrochloride |
| Hydralazine 50mg tablets                                                   | 742041000033119   | 318650003         | Hydralazine hydrochloride |
| Hydralazine 10mg tablets                                                   | 12877141000033119 | 414426001         | Hydralazine hydrochloride |
| Apo-Hydralazine 10mg tablets (Imported (United States))                    | 12877241000033114 | 10637411000001100 | Hydralazine hydrochloride |
| Hydralazine 10mg/5ml oral suspension                                       | 4456241000033111  | 8528611000001105  | Hydralazine hydrochloride |
| Hydralazine 25mg/5ml oral solution                                         | 11072741000033116 | 8580911000001106  | Hydralazine hydrochloride |
| Apresoline 20mg powder for solution for injection ampoules (Advanz Pharma) | 73441000033117    | 3925011000001100  | Hydralazine hydrochloride |
| Hydralazine 20mg powder for solution for injection ampoules                | 734141000033114   | 34193811000001100 | Hydralazine hydrochloride |
| Tanatril 20mg tablets (Mitsubishi Tanabe Pharma Europe Ltd)                | 2145741000033116  | 533511000001106   | Imidapril hydrochloride   |
| Imidapril 20mg tablets                                                     | 2145841000033114  | 318942009         | Imidapril hydrochloride   |
| Imidapril 5mg tablets                                                      | 1739841000033119  | 318943004         | Imidapril hydrochloride   |
| Tanatril 5mg tablets (Mitsubishi Tanabe Pharma Europe Ltd)                 | 1753941000033114  | 797911000001103   | Imidapril hydrochloride   |
| Tanatril 10mg tablets (Mitsubishi Tanabe Pharma Europe Ltd)                | 1753841000033118  | 680811000001102   | Imidapril hydrochloride   |
| Imidapril 10mg tablets                                                     | 1739741000033112  | 318944005         | Imidapril hydrochloride   |

|                                                                      |                   |                   |                                     |
|----------------------------------------------------------------------|-------------------|-------------------|-------------------------------------|
| Indapamide 2.5mg tablets                                             | 768641000033118   | 317956008         | Indapamide hemihydrate              |
| Nindaxa 2.5 tablets (Ashbourne Pharmaceuticals Ltd)                  | 769741000033118   | 424311000001108   | Indapamide hemihydrate              |
| Natrilix 2.5mg tablets (Servier Laboratories Ltd)                    | 955341000033117   | 321811000001109   | Indapamide hemihydrate              |
| Coversyl Plus tablets (Servier Laboratories Ltd)                     | 2739541000033117  | 562511000001109   | Indapamide/<br>Perindopril erbumine |
| Perindopril erbumine 4mg / Indapamide 1.25mg tablets                 | 3161641000033114  | 3437611000001100  | Indapamide/<br>Perindopril erbumine |
| Perindopril arginine 5mg / Indapamide 1.25mg tablets                 | 4454541000033118  | 13454311000001101 | Indapamide/<br>Perindopril arginine |
| Coversyl Arginine Plus 5mg/1.25mg tablets (Servier Laboratories Ltd) | 4454641000033117  | 13444311000001104 | Indapamide/<br>Perindopril arginine |
| Indapamide 2.5mg/5ml oral suspension                                 | 8197041000033112  | 21578911000001105 | Indapamide                          |
| Perindopril tosilate 5mg / Indapamide 1.25mg tablets                 | 8263641000033112  | 21940011000001101 | Indapamide/<br>Perindopril tosilate |
| Natrilix SR 1.5mg tablets (Servier Laboratories Ltd)                 | 953141000033119   | 456611000001108   | Indapamide                          |
| Rawel XL 1.5mg tablets (Consilient Health Ltd)                       | 5566041000033114  | 16737911000001105 | Indapamide                          |
| Ethibide XL 1.5mg tablets (Genus Pharmaceuticals Ltd)                | 4571241000033110  | 13824811000001102 | Indapamide                          |
| Tensaid XL 1.5mg tablets (Mylan)                                     | 4656741000033119  | 14242211000001100 | Indapamide                          |
| Varbim XL 1.5mg tablets (Teva UK Ltd)                                | 5816741000033112  | 14693611000001102 | Indapamide                          |
| Indipam XL 1.5mg tablets (Accord Healthcare Ltd)                     | 5053141000033113  | 15436111000001104 | Indapamide                          |
| Mapemid XL 1.5mg tablets (Teva UK Ltd)                               | 5128741000033110  | 15600711000001107 | Indapamide                          |
| Indapamide 1.5mg modified-release tablets                            | 765741000033116   | 39020711000001100 | Indapamide                          |
| Cardide SR 1.5mg tablets (Teva UK Ltd)                               | 9121841000033115  | 24331611000001104 | Indapamide                          |
| Alkapamid XL 1.5mg tablets (HBS Healthcare Ltd)                      | 12312641000033118 | 34494911000001106 | Indapamide                          |
| Lorvacx XL 1.5mg tablets (Torrent Pharma (UK) Ltd)                   | 12988441000033113 | 36812711000001103 | Indapamide                          |
| Indoramin 20mg tablets                                               | 768541000033119   | 318739007         | Indoramin hydrochloride             |
| Doralese Tiltab 20mg tablets (Chemidex Pharma Ltd)                   | 480541000033110   | 3354611000001100  | Indoramin hydrochloride             |
| Baratol 25mg tablets (Amdipharm Plc)                                 | 116741000033118   | 3689111000001107  | Indoramin hydrochloride             |
| Indoramin 25mg tablets                                               | 769841000033111   | 318740009         | Indoramin hydrochloride             |
| Irbesartan 75mg tablets                                              | 775641000033115   | 318968002         | Irbesartan                          |
| Aprovel 75mg tablets (Sanofi)                                        | 76141000033117    | 434511000001104   | Irbesartan                          |
| Sabervel 75mg tablets (Aspire Pharma Ltd)                            | 8193941000033116  | 21522211000001102 | Irbesartan                          |
| Ifirmasta 75mg tablets (Consilient Health Ltd)                       | 8554141000033116  | 22720311000001108 | Irbesartan                          |
| Ifirmasta 150mg tablets (Consilient Health Ltd)                      | 8554241000033111  | 22720611000001103 | Irbesartan                          |
| Sabervel 150mg tablets (Aspire Pharma Ltd)                           | 8194041000033119  | 21522411000001103 | Irbesartan                          |
| Aprovel 150mg tablets (Sanofi)                                       | 75941000033114    | 859711000001103   | Irbesartan                          |
| Irbesartan 150mg tablets                                             | 775441000033117   | 318969005         | Irbesartan                          |
| Irbesartan 300mg tablets                                             | 775541000033116   | 318970006         | Irbesartan                          |
| Aprovel 300mg tablets (Sanofi)                                       | 76041000033116    | 323211000001107   | Irbesartan                          |
| Sabervel 300mg tablets (Aspire Pharma Ltd)                           | 8194141000033115  | 21522611000001100 | Irbesartan                          |

|                                                                 |                   |                   |                             |
|-----------------------------------------------------------------|-------------------|-------------------|-----------------------------|
| Ifirmasta 300mg tablets (Consilient Health Ltd)                 | 8554341000033118  | 22720811000001104 | Irbesartan                  |
| Irbesartan 150mg/5ml oral suspension                            | 5970641000033117  | 8580811000001101  | Irbesartan                  |
| Irbesartan 300mg/5ml oral suspension                            | 4954341000033111  | 12639511000001103 | Irbesartan                  |
| Irbesartan 20mg oral powder sachets                             | 6167841000033112  | 18852211000001107 | Irbesartan                  |
| Irbesartan 30mg oral powder sachets                             | 6423941000033116  | 19281511000001102 | Irbesartan                  |
| Irbesartan 37.5mg oral powder sachets                           | 6435741000033117  | 19481911000001105 | Irbesartan                  |
| Prescal 2.5mg tablets (Novartis Pharmaceuticals UK Ltd)         | 1140241000033117  | 3689711000001108  | Isradipine                  |
| Isradipine 2.5mg tablets                                        | 784641000033112   | 319280009         | Isradipine                  |
| Lacidipine 2mg tablets                                          | 817541000033119   | 319300008         | Lacidipine                  |
| Motens 2mg tablets (GlaxoSmithKline UK Ltd)                     | 937041000033114   | 910911000001108   | Lacidipine                  |
| Motens 4mg tablets (GlaxoSmithKline UK Ltd)                     | 937141000033113   | 333011000001100   | Lacidipine                  |
| Lacidipine 4mg tablets                                          | 817641000033118   | 319301007         | Lacidipine                  |
| Molap 4mg tablets (Rivopharm (UK) Ltd)                          | 10217641000033116 | 28882211000001100 | Lacidipine                  |
| Lacidipine 6mg tablets                                          | 13344441000033112 | 38019311000001102 | Lacidipine                  |
| Lercanidipine 10mg tablets                                      | 825941000033112   | 319316005         | Lercanidipine hydrochloride |
| Zanidip 10mg tablets (Recordati Pharmaceuticals Ltd)            | 1550841000033111  | 20011000001105    | Lercanidipine hydrochloride |
| Lercanidipine 20mg tablets                                      | 3908741000033114  | 10225911000001102 | Lercanidipine hydrochloride |
| Zanidip 20mg tablets (Recordati Pharmaceuticals Ltd)            | 3908841000033116  | 10198711000001102 | Lercanidipine hydrochloride |
| Zestril 2.5mg tablets (AstraZeneca UK Ltd)                      | 1552041000033115  | 593111000001108   | Lisinopril                  |
| Carace 2.5mg tablets (Bristol-Myers Squibb Pharmaceuticals Ltd) | 216041000033118   | 321011000001103   | Lisinopril                  |
| Lisinopril 2.5mg tablets                                        | 837941000033119   | 318857003         | Lisinopril                  |
| Lisinopril 5mg tablets                                          | 838141000033117   | 318858008         | Lisinopril                  |
| Carace 5mg tablets (Bristol-Myers Squibb Pharmaceuticals Ltd)   | 216241000033114   | 778011000001109   | Lisinopril                  |
| Zestril 5mg tablets (AstraZeneca UK Ltd)                        | 1552241000033111  | 823211000001109   | Lisinopril                  |
| Zestril 10mg tablets (AstraZeneca UK Ltd)                       | 1551941000033114  | 825311000001100   | Lisinopril                  |
| Carace 10mg tablets (Bristol-Myers Squibb Pharmaceuticals Ltd)  | 215941000033111   | 315211000001104   | Lisinopril                  |
| Lisinopril 10mg tablets                                         | 837841000033110   | 318859000         | Lisinopril                  |
| Lisinopril 20mg tablets                                         | 838041000033116   | 318860005         | Lisinopril                  |
| Carace 20mg tablets (Bristol-Myers Squibb Pharmaceuticals Ltd)  | 216141000033119   | 56711000001109    | Lisinopril                  |
| Zestril 20mg tablets (AstraZeneca UK Ltd)                       | 1552141000033116  | 891711000001107   | Lisinopril                  |
| Lisinopril 2.5mg/5ml oral solution                              | 5971341000033117  | 8622111000001109  | Lisinopril                  |
| Lisinopril 2.5mg/5ml oral suspension                            | 5971441000033111  | 8622211000001103  | Lisinopril                  |
| Lisinopril 20mg/5ml oral solution                               | 6044641000033119  | 8622311000001106  | Lisinopril                  |
| Lisinopril 20mg/5ml oral suspension                             | 6044541000033115  | 8622411000001104  | Lisinopril                  |
| Lisinopril 5mg/5ml oral solution                                | 5890241000033117  | 8622511000001100  | Lisinopril                  |
| Lisinopril 5mg/5ml oral suspension                              | 3152141000033115  | 8622611000001101  | Lisinopril                  |
| Lisinopril 7.5mg/5ml oral solution                              | 5971541000033112  | 8622811000001102  | Lisinopril                  |
| Lisinopril 7.5mg/5ml oral suspension                            | 5971641000033113  | 8622911000001107  | Lisinopril                  |
| Lisinopril 40mg/5ml oral suspension                             | 5568741000033113  | 20556011000001103 | Lisinopril                  |

|                                                           |                   |                   |                         |
|-----------------------------------------------------------|-------------------|-------------------|-------------------------|
| Lisinopril 5mg/5ml oral solution sugar free               | 10645041000033114 | 30251811000001106 | Lisinopril              |
| Losartan 25mg tablets                                     | 851841000033117   | 318955005         | Losartan potassium      |
| Cozaar 25mg tablets (Merck Sharp & Dohme Ltd)             | 370441000033112   | 266511000001104   | Losartan potassium      |
| Cozaar 50mg tablets (Merck Sharp & Dohme Ltd)             | 370541000033113   | 53611000001106    | Losartan potassium      |
| Losartan 50mg tablets                                     | 851941000033113   | 318956006         | Losartan potassium      |
| Losartan 100mg tablets                                    | 2720141000033115  | 407784004         | Losartan potassium      |
| Cozaar 100mg tablets (Merck Sharp & Dohme Ltd)            | 2720241000033110  | 245811000001102   | Losartan potassium      |
| Losartan 50mg/5ml oral solution                           | 5971941000033118  | 14159411000001106 | Losartan potassium      |
| Losartan 50mg/5ml oral suspension                         | 5972041000033112  | 14159511000001105 | Losartan potassium      |
| Losartan 12.5mg tablets                                   | 4957541000033114  | 15148111000001100 | Losartan potassium      |
| Cozaar 12.5mg tablets (Merck Sharp & Dohme Ltd)           | 4957641000033110  | 15138911000001101 | Losartan potassium      |
| Losartan 100mg/5ml oral solution                          | 5971741000033116  | 15451111000001107 | Losartan potassium      |
| Losartan 100mg/5ml oral suspension                        | 5971841000033114  | 15451211000001101 | Losartan potassium      |
| Cozaar 2.5mg/ml oral suspension (Merck Sharp & Dohme Ltd) | 5150041000033110  | 15506811000001105 | Losartan potassium      |
| Losartan 2.5mg/ml oral suspension sugar free              | 5149941000033118  | 15507411000001105 | Losartan potassium      |
| Methyldopa 125mg tablets                                  | 897341000033110   | 318671008         | Methyldopa anhydrous    |
| Methyldopa 250mg tablets                                  | 897441000033116   | 318672001         | Methyldopa anhydrous    |
| Aldomet 250mg tablets (Aspen Pharma Trading Ltd)          | 40941000033118    | 253711000001107   | Methyldopa anhydrous    |
| Aldomet 500mg tablets (Aspen Pharma Trading Ltd)          | 41041000033111    | 73611000001108    | Methyldopa anhydrous    |
| Methyldopa 500mg tablets                                  | 897541000033115   | 318673006         | Methyldopa anhydrous    |
| Methyldopa 250mg/5ml oral suspension                      | 892341000033112   | 8667311000001100  | Methyldopa anhydrous    |
| Metenix 5mg tablets (Sanofi)                              | 896841000033116   | 375611000001109   | Metolazone              |
| Metolazone 5mg tablets                                    | 903541000033116   | 317965001         | Metolazone              |
| Zaroxolyn 5mg tablets (Imported (Canada))                 | 8196641000033116  | 21574611000001109 | Metolazone              |
| Metolazone 2.5mg tablets                                  | 8196441000033118  | 374173002         | Metolazone              |
| Zaroxolyn 2.5mg tablets (Imported (Canada))               | 8196541000033117  | 21574911000001103 | Metolazone              |
| Loniten 10mg tablets (Pfizer Ltd)                         | 850441000033112   | 3666711000001100  | Minoxidil               |
| Minoxidil 10mg tablets                                    | 920641000033119   | 318657000         | Minoxidil               |
| Minoxidil 5mg tablets                                     | 920941000033114   | 318656009         | Minoxidil               |
| Loniten 5mg tablets (Pfizer Ltd)                          | 850641000033114   | 3666411000001106  | Minoxidil               |
| Loniten 2.5mg tablets (Pfizer Ltd)                        | 850541000033113   | 3667011000001104  | Minoxidil               |
| Minoxidil 2.5mg tablets                                   | 920841000033118   | 318655008         | Minoxidil               |
| Perdix 7.5mg tablets (UCB Pharma Ltd)                     | 1066041000033113  | 4041111000001109  | Moexipril hydrochloride |
| Moexipril 7.5mg tablets                                   | 938141000033112   | 318934008         | Moexipril hydrochloride |
| Moexipril 15mg tablets                                    | 938041000033113   | 318935009         | Moexipril hydrochloride |
| Perdix 15mg tablets (UCB Pharma Ltd)                      | 1065941000033115  | 4040311000001101  | Moexipril hydrochloride |
| Moxonidine 200microgram tablets                           | 938541000033115   | 318707000         | Moxonidine              |
| Physiotens 200microgram tablets (Mylan)                   | 1080841000033119  | 41111000001102    | Moxonidine              |

|                                                                  |                   |                   |                           |
|------------------------------------------------------------------|-------------------|-------------------|---------------------------|
| Physiotens 400microgram tablets (Mylan)                          | 1080941000033110  | 142811000001107   | Moxonidine                |
| Moxonidine 400microgram tablets                                  | 938641000033119   | 318708005         | Moxonidine                |
| Moxonidine 300microgram tablets                                  | 2635641000033111  | 408604009         | Moxonidine                |
| Physiotens 300microgram tablets (Mylan)                          | 2635741000033119  | 522011000001109   | Moxonidine                |
| Cardene 20mg capsules (Astellas Pharma Ltd)                      | 176741000033114   | 344811000001108   | Nicardipine hydrochloride |
| Nicardipine 20mg capsules                                        | 967741000033115   | 319217004         | Nicardipine hydrochloride |
| Nicardipine 30mg capsules                                        | 967141000033119   | 319218009         | Nicardipine hydrochloride |
| Cardene 30mg capsules (Astellas Pharma Ltd)                      | 176841000033116   | 291111000001102   | Nicardipine hydrochloride |
| Nicardipine 10mg/10ml solution for infusion ampoules             | 9697741000033114  | 27126711000001103 | Nicardipine hydrochloride |
| Cardene SR 30mg capsules (Astellas Pharma Ltd)                   | 198941000033118   | 540311000001105   | Nicardipine hydrochloride |
| Nicardipine 30mg modified-release capsules                       | 971441000033112   | 39021711000001108 | Nicardipine hydrochloride |
| Cardene SR 45mg capsules (Astellas Pharma Ltd)                   | 199041000033110   | 118811000001102   | Nicardipine hydrochloride |
| Nicardipine 45mg modified-release capsules                       | 971541000033113   | 39021811000001100 | Nicardipine hydrochloride |
| Adalat 5mg capsules (Bayer Plc)                                  | 14141000033116    | 27111000001107    | Nifedipine                |
| Nifedipine 5mg capsules                                          | 967341000033116   | 319222004         | Nifedipine                |
| Nifedipine 10mg capsules                                         | 967241000033114   | 319223009         | Nifedipine                |
| Adalat 10mg capsules (Bayer Plc)                                 | 14041000033115    | 782511000001108   | Nifedipine                |
| Angiopine 10 capsules (Ashbourne Pharmaceuticals Ltd)            | 61841000033111    | 811311000001107   | Nifedipine                |
| Nifedipine 10mg/5ml oral suspension                              | 5973741000033117  | 8670111000001106  | Nifedipine                |
| Nifedipine 5mg/5ml oral suspension                               | 5056241000033112  | 8670311000001108  | Nifedipine                |
| Nifedipine 20mg/ml oral drops                                    | 2639341000033117  | 9096811000001100  | Nifedipine                |
| Nifedipine 2.5mg/5ml oral suspension                             | 5402541000033112  | 12303311000001109 | Nifedipine                |
| Coracten XL 60mg capsules (UCB Pharma Ltd)                       | 1725041000033113  | 3381511000001105  | Nifedipine                |
| Nifedipine 60mg modified-release capsules                        | 1778841000033111  | 38896511000001101 | Nifedipine                |
| Coracten SR 20mg capsules (UCB Pharma Ltd)                       | 364241000033112   | 389611000001101   | Nifedipine                |
| Nifedipine 20mg modified-release capsules                        | 974141000033119   | 39022511000001106 | Nifedipine                |
| Slofedipine XL 60 tablets (Zentiva)                              | 1753041000033113  | 630411000001107   | Nifedipine                |
| Adalat LA 60mg tablets (Bayer Plc)                               | 17241000033117    | 235511000001104   | Nifedipine                |
| Adipine XL 60mg tablets (Chiesi Ltd)                             | 3225541000033116  | 9049911000001105  | Nifedipine                |
| Nimodrel XL 60mg tablets (Zurich Pharmaceuticals)                | 3952741000033118  | 10189311000001108 | Nifedipine                |
| Neozipine XL 60mg tablets (Kent Pharmaceuticals Ltd)             | 5817541000033118  | 10751411000001101 | Nifedipine                |
| Valni XL 60mg tablets (Zentiva)                                  | 4452041000033116  | 13402111000001101 | Nifedipine                |
| Adanif XL 60mg tablets (Advanz Pharma)                           | 5892041000033114  | 17666211000001101 | Nifedipine                |
| Nifedipine 60mg modified-release tablets                         | 971341000033118   | 39022611000001105 | Nifedipine                |
| Nidef 60mg modified-release tablets (Morningside Healthcare Ltd) | 12372441000033111 | 34685811000001103 | Nifedipine                |
| Cardilate MR 10mg tablets (Teva UK Ltd)                          | 1580841000033116  | 25911000001100    | Nifedipine                |
| Calchan MR 10 tablets (Ranbaxy (UK) Ltd)                         | 2295641000033116  | 627111000001104   | Nifedipine                |
| Angiopine MR 10mg tablets (Ashbourne Pharmaceuticals Ltd)        | 66141000033114    | 568911000001104   | Nifedipine                |

|                                                                  |                   |                   |             |
|------------------------------------------------------------------|-------------------|-------------------|-------------|
| Adalat retard 10mg tablets (Bayer Plc)                           | 19441000033113    | 569011000001108   | Nifedipine  |
| Tensipine MR 10 tablets (Genus Pharmaceuticals Ltd)              | 1421241000033110  | 413111000001101   | Nifedipine  |
| Adipine MR 10 tablets (Chiesi Ltd)                               | 18341000033114    | 833611000001109   | Nifedipine  |
| Nifedipress MR 10 tablets (Dexcel-Pharma Ltd)                    | 1745041000033110  | 904011000001104   | Nifedipine  |
| Nifedipine 10mg modified-release tablets                         | 971841000033110   | 39022711000001101 | Nifedipine  |
| Cardilate MR 20mg tablets (IVAX Pharmaceuticals UK Ltd)          | 199141000033114   | 905711000001103   | Nifedipine  |
| Slofedipine 20mg tablets (Sterwin Medicines)                     | 1697641000033111  | 843411000001105   | Nifedipine  |
| Adalat LA 20mg tablets (Bayer Plc)                               | 1766341000033113  | 881811000001100   | Nifedipine  |
| Angiopine MR 20mg tablets (Ashbourne Pharmaceuticals Ltd)        | 65241000033114    | 865011000001105   | Nifedipine  |
| Hypolar Retard 20 tablets (Sandoz Ltd)                           | 738141000033119   | 677411000001108   | Nifedipine  |
| Valni 20 Retard tablets (Tillomed Laboratories Ltd)              | 2955041000033115  | 693311000001101   | Nifedipine  |
| Tensipine MR 20 tablets (Genus Pharmaceuticals Ltd)              | 1421341000033117  | 385611000001104   | Nifedipine  |
| Nifedipress MR 20 tablets (Dexcel-Pharma Ltd)                    | 1745141000033114  | 619111000001101   | Nifedipine  |
| Calchan MR 20 tablets (Ranbaxy (UK) Ltd)                         | 2295741000033113  | 17011000001100    | Nifedipine  |
| Adalat retard 20mg tablets (Bayer Plc)                           | 19341000033119    | 5011000001109     | Nifedipine  |
| Adipine MR 20 tablets (Chiesi Ltd)                               | 18241000033116    | 74111000001103    | Nifedipine  |
| Nifopress Retard 20mg tablets (Advanz Pharma)                    | 2189541000033117  | 280811000001100   | Nifedipine  |
| Coroday MR 20mg tablets (Mylan)                                  | 2051241000033116  | 309611000001102   | Nifedipine  |
| Nifedipine 20mg modified-release tablets                         | 970941000033113   | 39022811000001109 | Nifedipine  |
| Coracten SR 10mg capsules (UCB Pharma Ltd)                       | 336641000033114   | 126411000001108   | Nifedipine  |
| Nifedipine 10mg modified-release capsules                        | 971141000033116   | 39022911000001104 | Nifedipine  |
| Coracten XL 30mg capsules (UCB Pharma Ltd)                       | 1724941000033113  | 162811000001100   | Nifedipine  |
| Nifedipine 30mg modified-release capsules                        | 1778741000033118  | 39107511000001109 | Nifedipine  |
| Fortipine LA 40 tablets (Advanz Pharma)                          | 605941000033110   | 188711000001108   | Nifedipine  |
| Nifedipine 40mg modified-release tablets                         | 972441000033116   | 39107611000001108 | Nifedipine  |
| Adalat LA 30mg tablets (Bayer Plc)                               | 17141000033112    | 2881311000001105  | Nifedipine  |
| Hypolar XL 30 tablets (Sandoz Ltd)                               | 2776541000033111  | 2881811000001101  | Nifedipine  |
| Slofedipine XL 30mg tablets (Zentiva)                            | 1752941000033115  | 2882011000001104  | Nifedipine  |
| Nimodrel XL 30mg tablets (Zurich Pharmaceuticals)                | 3952641000033110  | 10189111000001106 | Nifedipine  |
| Adipine XL 30mg tablets (Chiesi Ltd)                             | 3225441000033117  | 9049711000001108  | Nifedipine  |
| Neozipine XL 30mg tablets (Kent Pharmaceuticals Ltd)             | 5817441000033119  | 10751211000001100 | Nifedipine  |
| Valni XL 30mg tablets (Zentiva)                                  | 4451941000033110  | 13401911000001109 | Nifedipine  |
| Adanif XL 30mg tablets (Advanz Pharma)                           | 5891941000033115  | 17666011000001106 | Nifedipine  |
| Nifedipine 30mg modified-release tablets                         | 971241000033111   | 39111711000001105 | Nifedipine  |
| Nidef 30mg modified-release tablets (Morningside Healthcare Ltd) | 12372341000033117 | 34685211000001104 | Nifedipine  |
| Nimotop 30mg tablets (Bayer Plc)                                 | 977741000033114   | 3879211000001104  | Nimodipine  |
| Nimodipine 30mg tablets                                          | 977441000033119   | 323273000         | Nimodipine  |
| Nimotop 0.02% solution for infusion 50ml vials (Bayer Plc)       | 970841000033117   | 4387211000001100  | Nimodipine  |
| Nimodipine 10mg/50ml solution for infusion vials                 | 970741000033110   | 36031711000001104 | Nimodipine  |
| Syscor MR 10 tablets (Forest Laboratories UK Ltd)                | 1401341000033110  | 3877011000001100  | Nisoldipine |

|                                                            |                  |                   |                        |
|------------------------------------------------------------|------------------|-------------------|------------------------|
| Nisoldipine 10mg modified-release tablets                  | 972141000033112  | 36031811000001107 | Nisoldipine            |
| Syscor MR 20 tablets (Forest Laboratories UK Ltd)          | 1401441000033116 | 4070011000001100  | Nisoldipine            |
| Nisoldipine 20mg modified-release tablets                  | 972241000033117  | 36031911000001102 | Nisoldipine            |
| Syscor MR 30 tablets (Forest Laboratories UK Ltd)          | 1401541000033115 | 4069211000001108  | Nisoldipine            |
| Nisoldipine 30mg modified-release tablets                  | 972341000033110  | 36032011000001109 | Nisoldipine            |
| Olmesartan medoxomil 20mg tablets                          | 2944641000033112 | 385542009         | Olmesartan medoxomil   |
| Olmotec 20mg tablets (Daiichi Sankyo UK Ltd)               | 2944941000033117 | 4624311000001103  | Olmesartan medoxomil   |
| Olmotec 40mg tablets (Daiichi Sankyo UK Ltd)               | 2945041000033117 | 4624611000001108  | Olmesartan medoxomil   |
| Olmesartan medoxomil 40mg tablets                          | 2944741000033115 | 385543004         | Olmesartan medoxomil   |
| Olmesartan medoxomil 10mg tablets                          | 2944541000033111 | 408055003         | Olmesartan medoxomil   |
| Olmotec 10mg tablets (Daiichi Sankyo UK Ltd)               | 2944841000033113 | 4624011000001101  | Olmesartan medoxomil   |
| Olmesartan medoxomil 10mg/5ml oral suspension              | 4273241000033118 | 14680711000001103 | Olmesartan medoxomil   |
| Perindopril erbumine 2mg tablets                           | 1067841000033115 | 318896009         | Perindopril erbumine   |
| Coversyl 2mg tablets (Servier Laboratories Ltd)            | 377541000033114  | 48211000001104    | Perindopril erbumine   |
| Coversyl 4mg tablets (Servier Laboratories Ltd)            | 377641000033110  | 902211000001100   | Perindopril erbumine   |
| Perindopril erbumine 4mg tablets                           | 1067941000033111 | 318897000         | Perindopril erbumine   |
| Perindopril erbumine 8mg tablets                           | 2846741000033119 | 374667004         | Perindopril erbumine   |
| Coversyl 8mg tablets (Servier Laboratories Ltd)            | 2846641000033111 | 3803711000001101  | Perindopril erbumine   |
| Perindopril erbumine 4mg/5ml oral suspension               | 8276041000033117 | 8671311000001103  | Perindopril erbumine   |
| Coversyl Arginine 10mg tablets (Servier Laboratories Ltd)  | 4454441000033119 | 13444611000001109 | Perindopril arginine   |
| Perindopril arginine 10mg tablets                          | 4454141000033110 | 13454111000001103 | Perindopril arginine   |
| Perindopril arginine 2.5mg tablets                         | 4453941000033114 | 13454211000001109 | Perindopril arginine   |
| Coversyl Arginine 2.5mg tablets (Servier Laboratories Ltd) | 4454241000033115 | 13445211000001108 | Perindopril arginine   |
| Perindopril arginine 5mg tablets                           | 4454041000033111 | 13454411000001108 | Perindopril arginine   |
| Coversyl Arginine 5mg tablets (Servier Laboratories Ltd)   | 4454341000033113 | 13444911000001103 | Perindopril arginine   |
| Perindopril erbumine 8mg/5ml oral solution                 | 8275941000033110 | 14057311000001102 | Perindopril erbumine   |
| Perindopril erbumine 8mg/5ml oral suspension               | 8276141000033118 | 14057411000001109 | Perindopril erbumine   |
| Perindopril tosilate 10mg tablets                          | 8263541000033111 | 21939811000001102 | Perindopril tosilate   |
| Perindopril tosilate 2.5mg tablets                         | 8263341000033116 | 21939911000001107 | Perindopril tosilate   |
| Perindopril tosilate 5mg tablets                           | 8263441000033110 | 21940111000001100 | Perindopril tosilate   |
| Perindopril erbumine 4mg/5ml oral solution                 | 8869441000033119 | 23471511000001106 | Perindopril erbumine   |
| Polythiazide 1mg tablets                                   | 1110141000033119 | 317967009         | Polythiazide           |
| Nephрил 1mg tablets (Pfizer Ltd)                           | 965441000033115  | 4549211000001100  | Polythiazide           |
| Hypovase 500microgram tablets (Pfizer Ltd)                 | 743541000033118  | 321311000001100   | Prazosin hydrochloride |

|                                                     |                   |                   |                         |
|-----------------------------------------------------|-------------------|-------------------|-------------------------|
| Prazosin 500microgram tablets                       | 1131341000033118  | 318767003         | Prazosin hydrochloride  |
| Prazosin 1mg tablets                                | 1131441000033112  | 318768008         | Prazosin hydrochloride  |
| Hypovase 1mg tablets (Pfizer Ltd)                   | 743641000033117   | 347411000001101   | Prazosin hydrochloride  |
| Alphavase 1 tablets (Ashbourne Pharmaceuticals Ltd) | 37741000033118    | 934411000001100   | Prazosin hydrochloride  |
| Alphavase 2 tablets (Ashbourne Pharmaceuticals Ltd) | 37841000033111    | 570011000001106   | Prazosin hydrochloride  |
| Hypovase 2mg tablets (Pfizer Ltd)                   | 743741000033114   | 150911000001104   | Prazosin hydrochloride  |
| Prazosin 2mg tablets                                | 1131541000033113  | 318769000         | Prazosin hydrochloride  |
| Prazosin 5mg tablets                                | 1131641000033114  | 318770004         | Prazosin hydrochloride  |
| Alphavase 5 tablets (Ashbourne Pharmaceuticals Ltd) | 37941000033115    | 74711000001102    | Prazosin hydrochloride  |
| Prazosin 500micrograms/5ml oral solution            | 11567441000033119 | 13078011000001104 | Prazosin hydrochloride  |
| Accupro 5mg tablets (Pfizer Ltd)                    | 13441000033110    | 582611000001106   | Quinapril hydrochloride |
| Quinil 5mg tablets (Tillomed Laboratories Ltd)      | 3283141000033118  | 9207711000001100  | Quinapril hydrochloride |
| Quinapril 5mg tablets                               | 1149241000033111  | 318885001         | Quinapril hydrochloride |
| Quinapril 10mg tablets                              | 1149341000033118  | 318886000         | Quinapril hydrochloride |
| Quinil 10mg tablets (Tillomed Laboratories Ltd)     | 3283241000033113  | 9208111000001100  | Quinapril hydrochloride |
| Accupro 10mg tablets (Pfizer Ltd)                   | 13241000033114    | 231111000001106   | Quinapril hydrochloride |
| Accupro 20mg tablets (Pfizer Ltd)                   | 13341000033116    | 829111000001100   | Quinapril hydrochloride |
| Quinil 20mg tablets (Tillomed Laboratories Ltd)     | 3283341000033115  | 9208411000001105  | Quinapril hydrochloride |
| Quinapril 20mg tablets                              | 1149441000033112  | 318887009         | Quinapril hydrochloride |
| Accupro 40mg tablets (Pfizer Ltd)                   | 11641000033111    | 86411000001109    | Quinapril hydrochloride |
| Quinil 40mg tablets (Tillomed Laboratories Ltd)     | 3283441000033114  | 9208711000001104  | Quinapril hydrochloride |
| Quinapril 40mg tablets                              | 1149541000033113  | 318894007         | Quinapril hydrochloride |
| Ramipril 1.25mg capsules                            | 1151341000033117  | 318900007         | Ramipril                |
| Tritace 1.25mg capsules (Aventis Pharma)            | 1455541000033110  | 111611000001109   | Ramipril                |
| Tritace 2.5mg capsules (Sanofi)                     | 1455641000033111  | 835411000001105   | Ramipril                |
| Lopace 2.5mg capsules (Discovery Pharmaceuticals)   | 3159741000033111  | 7948711000001102  | Ramipril                |
| Ramipril 2.5mg capsules                             | 1151441000033111  | 318901006         | Ramipril                |
| Ramipril 5mg capsules                               | 1151541000033112  | 318902004         | Ramipril                |
| Lopace 5mg capsules (Discovery Pharmaceuticals)     | 3159841000033118  | 7948911000001100  | Ramipril                |
| Tritace 5mg capsules (Sanofi)                       | 1455741000033119  | 802311000001101   | Ramipril                |
| Tritace 10mg capsules (Sanofi)                      | 1769941000033115  | 43711000001100    | Ramipril                |
| Lopace 10mg capsules (Discovery Pharmaceuticals)    | 3159941000033114  | 7949111000001105  | Ramipril                |
| Ramipril 10mg capsules                              | 1769841000033111  | 318906001         | Ramipril                |
| Ramipril 1.25mg tablets                             | 2989541000033115  | 408040007         | Ramipril                |
| Tritace 1.25mg tablets (Sanofi)                     | 2989941000033114  | 5010511000001106  | Ramipril                |



|                                                                  |                   |                   |                               |
|------------------------------------------------------------------|-------------------|-------------------|-------------------------------|
| Tritace 2.5mg tablets (Sanofi)                                   | 2990041000033116  | 5010811000001109  | Ramipril                      |
| Ramipril 2.5mg tablets                                           | 2989641000033119  | 408050008         | Ramipril                      |
| Ramipril 5mg tablets                                             | 2989741000033111  | 408051007         | Ramipril                      |
| Tritace 5mg tablets (Sanofi)                                     | 2990141000033117  | 5011111000001108  | Ramipril                      |
| Tritace 10mg tablets (Sanofi)                                    | 2990241000033112  | 5011411000001103  | Ramipril                      |
| Ramipril 10mg tablets                                            | 2989841000033118  | 408052000         | Ramipril                      |
| Ramipril 1.25mg/5ml oral solution                                | 5998241000033112  | 8720211000001109  | Ramipril                      |
| Ramipril 1.25mg/5ml oral suspension                              | 4152241000033113  | 8720311000001101  | Ramipril                      |
| Ramipril 10mg/5ml oral solution                                  | 5887841000033118  | 8720411000001108  | Ramipril                      |
| Ramipril 10mg/5ml oral suspension                                | 5887941000033114  | 8720511000001107  | Ramipril                      |
| Ramipril 2.5mg/5ml oral solution                                 | 5890541000033115  | 8720611000001106  | Ramipril                      |
| Ramipril 2.5mg/5ml oral suspension                               | 4805941000033114  | 8720711000001102  | Ramipril                      |
| Ramipril 5mg/5ml oral solution                                   | 5890341000033110  | 8720811000001105  | Ramipril                      |
| Ramipril 5mg/5ml oral suspension                                 | 2883341000033118  | 8720911000001100  | Ramipril                      |
| Ramipril 2.5mg/5ml oral solution sugar free                      | 6517041000033110  | 19877111000001100 | Ramipril                      |
| Sacubitril 24mg / Valsartan 26mg tablets                         | 10943641000033117 | 31142011000001103 | Sacubitril/<br>Valsartan      |
| Entresto 24mg/26mg tablets (Novartis<br>Pharmaceuticals UK Ltd)  | 10943941000033112 | 31136811000001109 | Sacubitril/<br>Valsartan      |
| Sacubitril 49mg / Valsartan 51mg tablets                         | 10943741000033114 | 31142111000001102 | Sacubitril/<br>Valsartan      |
| Entresto 49mg/51mg tablets (Novartis<br>Pharmaceuticals UK Ltd)  | 10944041000033114 | 31136411000001107 | Sacubitril/<br>Valsartan      |
| Sacubitril 97mg / Valsartan 103mg tablets                        | 10943841000033116 | 31142211000001108 | Sacubitril/<br>Valsartan      |
| Entresto 97mg/103mg tablets (Novartis<br>Pharmaceuticals UK Ltd) | 10944141000033113 | 31138011000001104 | Sacubitril/<br>Valsartan      |
| Spironolactone 25mg tablets                                      | 1374241000033118  | 318056008         | Spironolactone                |
| Aldactone 25mg tablets (Pfizer Ltd)                              | 40541000033112    | 930511000001105   | Spironolactone                |
| Aldactone 50mg tablets (Pfizer Ltd)                              | 40641000033113    | 921811000001103   | Spironolactone                |
| Spironolactone 50mg tablets                                      | 1374341000033111  | 318057004         | Spironolactone                |
| Spironolactone 100mg tablets                                     | 1374141000033113  | 318058009         | Spironolactone                |
| Spirospare 100 tablets (Ashbourne Pharmaceuticals<br>Ltd)        | 1374541000033116  | 3411000001104     | Spironolactone                |
| Aldactone 100mg tablets (Pfizer Ltd)                             | 40441000033111    | 421611000001100   | Spironolactone                |
| Lasilactone 20mg/50mg capsules (Sanofi)                          | 808841000033119   | 3645811000001107  | Furosemide/<br>Spironolactone |
| Spironolactone 50mg / Furosemide 20mg capsules                   | 3162541000033115  | 318102003         | Furosemide/<br>Spironolactone |
| Spironolactone 5mg/5ml oral suspension                           | 1371141000033111  | 8726311000001103  | Spironolactone                |
| Spironolactone 50mg/5ml oral suspension                          | 1371341000033114  | 8726411000001105  | Spironolactone                |
| Spironolactone 25mg/5ml oral suspension                          | 1371041000033112  | 8726511000001109  | Spironolactone                |
| Spironolactone 15mg/5ml oral suspension                          | 5975441000033113  | 8727011000001103  | Spironolactone                |
| Spironolactone 10mg/5ml oral suspension                          | 1371241000033116  | 8727311000001100  | Spironolactone                |
| Spironolactone 100mg/5ml oral suspension                         | 2011541000033114  | 8727611000001105  | Spironolactone                |
| Spironolactone 250mg/5ml oral solution                           | 5975541000033114  | 13353511000001101 | Spironolactone                |
| Spironolactone 250mg/5ml oral suspension                         | 5975641000033110  | 13353611000001102 | Spironolactone                |
| Spironolactone 100mg/5ml oral solution                           | 5999141000033111  | 13894611000001109 | Spironolactone                |

|                                                              |                   |                   |                                          |
|--------------------------------------------------------------|-------------------|-------------------|------------------------------------------|
| Spironolactone 10mg/5ml oral solution                        | 5999241000033116  | 13894711000001100 | Spironolactone                           |
| Spironolactone 25mg/5ml oral solution                        | 5890141000033112  | 13894811000001108 | Spironolactone                           |
| Spironolactone 50mg/5ml oral solution                        | 5890441000033116  | 13894911000001103 | Spironolactone                           |
| Spironolactone 5mg/5ml oral solution                         | 5999341000033114  | 13895011000001103 | Spironolactone                           |
| Telmisartan 20mg tablets                                     | 2272641000033119  | 134463001         | Telmisartan                              |
| Micardis 20mg tablets (Boehringer Ingelheim Ltd)             | 2272741000033111  | 648711000001100   | Telmisartan                              |
| Tolura 20mg tablets (Consilient Health Ltd)                  | 9209341000033116  | 24555211000001104 | Telmisartan                              |
| Micardis 40mg tablets (Boehringer Ingelheim Ltd)             | 1849741000033114  | 924911000001106   | Telmisartan                              |
| Telmisartan 40mg tablets                                     | 1849541000033118  | 318986004         | Telmisartan                              |
| Tolura 40mg tablets (Consilient Health Ltd)                  | 9209441000033110  | 24555411000001100 | Telmisartan                              |
| Telmisartan 80mg tablets                                     | 1849641000033117  | 318987008         | Telmisartan                              |
| Micardis 80mg tablets (Boehringer Ingelheim Ltd)             | 1849841000033116  | 527411000001102   | Telmisartan                              |
| Tolura 80mg tablets (Consilient Health Ltd)                  | 9209541000033111  | 24555611000001102 | Telmisartan                              |
| Hytrin 5mg tablets (Advanz Pharma)                           | 745841000033115   | 3154311000001103  | Terazosin hydrochloride                  |
| Terazosin 5mg tablets                                        | 1429141000033119  | 318776005         | Terazosin hydrochloride                  |
| Benph 5mg tablets (Mylan)                                    | 11807841000033119 | 33628611000001102 | Terazosin hydrochloride                  |
| Terazosin 10mg tablets                                       | 1429041000033118  | 318777001         | Terazosin hydrochloride                  |
| Hytrin 10mg tablets (Advanz Pharma)                          | 745641000033116   | 3150911000001107  | Terazosin hydrochloride                  |
| Hytrin 2mg tablets (Advanz Pharma)                           | 745741000033113   | 3147611000001100  | Terazosin hydrochloride                  |
| Terazosin 2mg tablets                                        | 1425341000033119  | 318779003         | Terazosin hydrochloride                  |
| Benph 2mg tablets (Mylan)                                    | 11799841000033112 | 33630711000001107 | Terazosin hydrochloride                  |
| Trandolapril 500microgram capsules                           | 1454141000033119  | 318924004         | Trandolapril                             |
| Gopten 500microgram capsules (Abbott Laboratories Ltd)       | 648541000033117   | 253511000001102   | Trandolapril                             |
| Odrik 500microgram capsules (Aventis Pharma)                 | 998741000033119   | 227511000001106   | Trandolapril                             |
| Gopten 1mg capsules (Abbott Laboratories Ltd)                | 648341000033112   | 346811000001101   | Trandolapril                             |
| Odrik 1mg capsules (Aventis Pharma)                          | 998541000033110   | 432911000001102   | Trandolapril                             |
| Trandolapril 1mg capsules                                    | 1453941000033115  | 318925003         | Trandolapril                             |
| Trandolapril 2mg capsules                                    | 1454041000033118  | 318926002         | Trandolapril                             |
| Gopten 2mg capsules (Abbott Laboratories Ltd)                | 648441000033118   | 273111000001109   | Trandolapril                             |
| Odrik 2mg capsules (Aventis Pharma)                          | 998641000033111   | 140511000001108   | Trandolapril                             |
| Gopten 4mg capsules (Abbott Laboratories Ltd)                | 3014841000033118  | 5651611000001103  | Trandolapril                             |
| Trandolapril 4mg capsules                                    | 3014741000033111  | 410958005         | Trandolapril                             |
| Tarka modified-release capsules (Abbott Laboratories Ltd)    | 1406341000033117  | 3691211000001101  | Trandolapril/<br>Verapamil hydrochloride |
| Verapamil 180mg modified-release / Trandolapril 2mg capsules | 3163041000033116  | 36149211000001102 | Trandolapril/<br>Verapamil hydrochloride |
| Trimetazidine 20mg tablets                                   | 7747541000033112  | 15243911000001109 | Trimetazidine dihydrochloride            |
| Trimetazidine 35mg modified-release tablets                  | 10495841000033113 | 20456111000001105 | Trimetazidine dihydrochloride            |

|                                                                |                   |                   |                               |
|----------------------------------------------------------------|-------------------|-------------------|-------------------------------|
| Vastarel MR 35mg tablets (Imported (France))                   | 5492841000033111  | 20434311000001100 | Trimetazidine dihydrochloride |
| Diovan 40mg capsules (Novartis Pharmaceuticals UK Ltd)         | 437741000033110   | 777611000001101   | Valsartan                     |
| Valsartan 40mg capsules                                        | 1498341000033118  | 318961008         | Valsartan                     |
| Valsartan 80mg capsules                                        | 1498441000033112  | 318962001         | Valsartan                     |
| Diovan 80mg capsules (Novartis Pharmaceuticals UK Ltd)         | 437841000033117   | 554511000001105   | Valsartan                     |
| Diovan 160mg capsules (Novartis Pharmaceuticals UK Ltd)        | 437641000033118   | 117011000001107   | Valsartan                     |
| Valsartan 160mg capsules                                       | 1498241000033111  | 318963006         | Valsartan                     |
| Valsartan 80mg tablets                                         | 6515441000033113  | 375034009         | Valsartan                     |
| Valsartan 160mg tablets                                        | 6515541000033114  | 375035005         | Valsartan                     |
| Valsartan 320mg tablets                                        | 4424941000033113  | 376487009         | Valsartan                     |
| Diovan 320mg tablets (Novartis Pharmaceuticals UK Ltd)         | 4425041000033113  | 13143311000001102 | Valsartan                     |
| Valsartan 40mg tablets                                         | 3201341000033115  | 416515008         | Valsartan                     |
| Diovan 40mg tablets (Novartis Pharmaceuticals UK Ltd)          | 3201441000033114  | 8263211000001101  | Valsartan                     |
| Valsartan 3mg/ml oral solution                                 | 6528441000033113  | 20007411000001100 | Valsartan                     |
| Diovan 3mg/1ml oral solution (Novartis Pharmaceuticals UK Ltd) | 6528541000033114  | 20001711000001102 | Valsartan                     |
| Diurexan 20mg tablets (Mylan)                                  | 470741000033113   | 348911000001105   | Xipamide                      |
| Xipamide 20mg tablets                                          | 1543941000033111  | 317970008         | Xipamide                      |
| Doxazosin 1mg tablets                                          | 480641000033111   | 318781001         | Doxazosin mesilate            |
| Cardura 1mg tablets (Upjohn UK Ltd)                            | 216741000033115   | 907711000001109   | Doxazosin mesilate            |
| Doxadura 1mg tablets (Dexcel-Pharma Ltd)                       | 2957941000033110  | 4857511000001108  | Doxazosin mesilate            |
| Doxadura 2mg tablets (Dexcel-Pharma Ltd)                       | 2958041000033113  | 4857711000001103  | Doxazosin mesilate            |
| Cascor 2mg tablets (Ranbaxy (UK) Ltd)                          | 2760041000033110  | 904511000001107   | Doxazosin mesilate            |
| Cardura 2mg tablets (Upjohn UK Ltd)                            | 216841000033113   | 41811000001109    | Doxazosin mesilate            |
| Doxazosin 2mg tablets                                          | 480741000033119   | 318782008         | Doxazosin mesilate            |
| Doxazosin 4mg tablets                                          | 480841000033112   | 318783003         | Doxazosin mesilate            |
| Cascor 4mg tablets (Ranbaxy (UK) Ltd)                          | 2760141000033114  | 179311000001107   | Doxazosin mesilate            |
| Doxadura 4mg tablets (Dexcel-Pharma Ltd)                       | 2958141000033112  | 4858111000001103  | Doxazosin mesilate            |
| Doxazosin 8mg tablets                                          | 12682141000033115 | 421069003         | Doxazosin mesilate            |
| Doxazosin 1mg/5ml oral suspension                              | 4432941000033119  | 8483411000001101  | Doxazosin mesilate            |
| Doxazosin 4mg/5ml oral suspension                              | 5138341000033111  | 8483511000001102  | Doxazosin mesilate            |
| Doxazosin 4mg/5ml oral solution                                | 8870641000033119  | 23466611000001105 | Doxazosin mesilate            |
| Doxazosin 1mg/5ml oral solution                                | 9173941000033111  | 24509711000001103 | Doxazosin mesilate            |
| Oxandosin XL 4mg tablets (Ratiopharm UK Ltd)                   | 4288341000033111  | 11812211000001105 | Doxazosin mesilate            |
| Colixil XL 4mg tablets (Sandoz Ltd)                            | 5403641000033117  | 11757711000001107 | Doxazosin mesilate            |
| Doxadura XL 4mg tablets (Dexcel-Pharma Ltd)                    | 4063741000033112  | 11269911000001101 | Doxazosin mesilate            |
| Slocinx XL 4mg tablets (Zentiva)                               | 4021141000033118  | 11098311000001104 | Doxazosin mesilate            |
| Doxzogen XL 4mg tablets (Mylan)                                | 4575941000033115  | 13811611000001108 | Doxazosin mesilate            |
| Cardozin XL 4mg tablets (Almus Pharmaceuticals Ltd)            | 4936841000033112  | 18197411000001107 | Doxazosin mesilate            |
| Raporsin XL 4mg tablets (Actavis UK Ltd)                       | 6036141000033119  | 18164911000001108 | Doxazosin mesilate            |

|                                        |                  |                   |                    |
|----------------------------------------|------------------|-------------------|--------------------|
| Larbex XL 4mg tablets (Teva UK Ltd)    | 5809641000033111 | 17338211000001104 | Doxazosin mesilate |
| Cardura XL 4mg tablets (Upjohn UK Ltd) | 2274041000033118 | 123911000001106   | Doxazosin mesilate |
| Doxazosin 4mg modified-release tablets | 2273841000033111 | 39020411000001106 | Doxazosin mesilate |
| Cardura XL 8mg tablets (Upjohn UK Ltd) | 2274141000033119 | 873411000001109   | Doxazosin mesilate |
| Doxazosin 8mg modified-release tablets | 2273941000033115 | 39021111000001107 | Doxazosin mesilate |

**Table S14. Heart failure selection Aurum codes**

| Term                                                        | Medcode ID       | SNOMED CT<br>Concept ID | SNOMED CT<br>Description ID |
|-------------------------------------------------------------|------------------|-------------------------|-----------------------------|
| Acute left ventricular failure                              | 300190010        | 195114002               | 300190010                   |
| Impaired left ventricular function                          | 411506018        | 275514001               | 411506018                   |
| H/O: heart failure                                          | 251680018        | 161505003               | 251680018                   |
| Congestive heart failure due to valvular disease            | 2675255018       | 426611007               | 2675255018                  |
| Left ventricular cardiac dysfunction                        | 2694523019       | 429589006               | 2694523019                  |
| CCF - Congestive cardiac failure                            | 3182551000006115 | 42343007                | 493288018                   |
| Chronic pulmonary oedema                                    | 494669012        | 46847001                | 494669012                   |
| Acute congestive heart failure                              | 18472010         | 10633002                | 18472010                    |
| COCM - Congestive cardiomyopathy                            | 6615881000006112 | 399020009               | 1786620011                  |
| Hypertensive heart disease NOS with CCF                     | 741681000006111  | 64715009                | 107545013                   |
| Congestive heart failure                                    | 70653017         | 42343007                | 70653017                    |
| Congestive cardiomyopathy                                   | 1778488011       | 399020009               | 1778488011                  |
| Cardiac failure                                             | 139482012        | 84114007                | 139482012                   |
| Heart failure with preserved ejection fraction              | 7321121000006119 | 446221000               | 3496968011                  |
| Congestive cardiac failure                                  | 3182541000006117 | 42343007                | 493287011                   |
| CCM - Congestive cardiomyopathy                             | 6615871000006114 | 399020009               | 1786619017                  |
| Heart failure with preserved ejection fraction              | 2227501000000110 | 446221000               | 2227501000000110            |
| Left ventricular failure                                    | 141306010        | 85232009                | 141306010                   |
| Chronic congestive heart failure                            | 147247018        | 88805009                | 147247018                   |
| Heart failure NOS                                           | 395772015        | 84114007                | 139475013                   |
| HF - Heart failure                                          | 3868341000006118 | 84114007                | 1234906013                  |
| History of heart failure in last year                       | 5990971000006113 | 309634009               | 2986867013                  |
| Pulmonary oedema NOS                                        | 301694014        | 19242006                | 479262018                   |
| Congestive obstructive cardiomyopathy                       | 350413012        | 233871002               | 350413012                   |
| Biventricular failure                                       | 4005301000006110 | 92506005                | 510016018                   |
| Hypertensive heart&renal dis wth (congestive) heart failure | 741701000006114  | 194779001               | 299672017                   |
| Left-sided heart failure                                    | 3886061000006119 | 85232009                | 201199018                   |
| Heart failure confirmed                                     | 1488804017       | 395105005               | 1488804017                  |
| Hyperten heart&renal dis+both(congestv)heart and renal fail | 789941000006117  | 194781004               | 299674016                   |
| Decompensated cardiac failure                               | 300179017        | 195111005               | 300179017                   |
| Compensated cardiac failure                                 | 300180019        | 195112003               | 300180019                   |
| Benign hypertensive heart disease with CCF                  | 504901000006118  | 194767001               | 299653017                   |
| HFNEF - heart failure with normal ejection fraction         | 1661371000000112 | 446221000               | 1713091000000115            |
| Severe left ventricular systolic dysfunction                | 1991651000006115 | 1991651000006104        | 1991651000006115            |
| LVF - Left ventricular failure                              | 3886071000006114 | 85232009                | 1235017018                  |
| Left heart failure                                          | 3886041000006118 | 85232009                | 141303019                   |
| Cardiac failure NOS                                         | 223981000000118  | 84114007                | 139482012                   |
| [RFC] Cardiac failure                                       | 905391000006119  | 905391000006103         | 905391000006119             |
| Congestive cardiac failure                                  | 493287011        | 42343007                | 70653017                    |

|                                                                    |                  |           |            |
|--------------------------------------------------------------------|------------------|-----------|------------|
| Acute heart failure                                                | 94251011         | 56675007  | 94251011   |
| Post cardiac operation heart failure NOS                           | 300217019        | 195130005 | 300214014  |
| CHF - Congestive heart failure                                     | 3182561000006118 | 42343007  | 493289014  |
| Heart failure                                                      | 139475013        | 84114007  | 139475013  |
| Heart failure with normal ejection fraction                        | 1647701000000118 | 446221000 | 2883808011 |
| Echocardiogram shows left ventricular systolic dysfunction         | 2159197017       | 407596008 | 2159197017 |
| Echocardiogram shows left ventricular diastolic dysfunction        | 2159198010       | 407597004 | 2159198010 |
| Pulmonary oedema - acute                                           | 1490256017       | 40541001  | 492666016  |
| Malignant hypertensive heart disease with CCF                      | 728671000006119  | 83105008  | 1236017010 |
| H/O: Heart failure in last year                                    | 453099015        | 309634009 | 453099015  |
| Biventricular failure                                              | 510016018        | 92506005  | 153058012  |
| Impaired left ventricular function                                 | 784191000006110  | 275514001 | 411506018  |
| History of heart failure                                           | 4540521000006111 | 161505003 | 2986453013 |
| Malignant hypertensive heart disease with congestive heart failure | 3852501000006115 | 83105008  | 137848017  |
| Left ventricular systolic dysfunction                              | 216207010        | 134401001 | 216207010  |

**Table S15. Loop Diuretics Aurum product codes**

| Term from EMIS                                                                                  | Prod code ID      | dmd ID            | Drug substance name                    |
|-------------------------------------------------------------------------------------------------|-------------------|-------------------|----------------------------------------|
| Burinex 1mg tablets (LEO Pharma)                                                                | 172741000033113   | 846411000001100   | Bumetanide                             |
| Bumetanide 1mg tablets                                                                          | 172441000033118   | 318021009         | Bumetanide                             |
| Bumetanide 5mg tablets                                                                          | 172541000033117   | 318022002         | Bumetanide                             |
| Burinex 5mg tablets (LEO Pharma)                                                                | 172841000033115   | 521811000001107   | Bumetanide                             |
| Bumetanide 1mg/5ml oral solution sugar free                                                     | 169041000033112   | 318023007         | Bumetanide                             |
| Burinex A 5mg/1mg tablets (LEO Pharma)                                                          | 172341000033112   | 33911000001104    | Amiloride hydrochloride/<br>Bumetanide |
| Amiloride 5mg / Bumetanide 1mg tablets                                                          | 1845641000033119  | 318097001         | Amiloride hydrochloride/<br>Bumetanide |
| Bumetanide 5mg/5ml oral suspension                                                              | 10713941000033113 | 30798811000001102 | Bumetanide                             |
| Bumetanide 2mg/4ml solution for injection ampoules                                              | 3858741000033112  | 35912911000001108 | Bumetanide                             |
| Burinex K modified-release tablets (LEO Pharma)                                                 | 172941000033111   | 3290211000001109  | Bumetanide/<br>Potassium chloride      |
| Bumetanide 500microgram / Potassium chloride 573mg (potassium 7.7mmol) modified-release tablets | 1845741000033111  | 35913011000001100 | Bumetanide/<br>Potassium chloride      |
| Furosemide 20mg tablets                                                                         | 3092241000033113  | 317971007         | Furosemide                             |
| Lasix 20mg tablets (Borg Medicare)                                                              | 816341000033112   | 701611000001102   | Furosemide                             |
| Froop 40mg tablets (Ashbourne Pharmaceuticals Ltd)                                              | 615541000033119   | 714311000001107   | Furosemide                             |
| Lasix 40mg tablets (Sanofi)                                                                     | 816441000033118   | 79411000001107    | Furosemide                             |
| Frusid 40mg tablets (Dr Reddy's Laboratories (UK) Ltd)                                          | 615141000033111   | 99311000001108    | Furosemide                             |
| Furosemide 40mg tablets                                                                         | 3092341000033115  | 317972000         | Furosemide                             |
| Furosemide 500mg tablets                                                                        | 3092441000033114  | 317973005         | Furosemide                             |
| Lasix 500mg tablets (Sanofi)                                                                    | 816541000033117   | 829911000001102   | Furosemide                             |
| Diuresal 500mg tablets (Ennogen Pharma Ltd)                                                     | 9808241000033110  | 27992311000001106 | Furosemide                             |
| Lasix 5mg/5ml oral solution (Borg Medicare)                                                     | 812041000033114   | 701111000001105   | Furosemide                             |
| Triamterene 50mg / Furosemide 40mg tablets                                                      | 3092741000033119  | 318101005         | Furosemide/<br>Triamterene             |
| Frusene 50mg/40mg tablets (Orion Pharma (UK) Ltd)                                               | 615041000033112   | 25411000001108    | Furosemide/<br>Triamterene             |
| Lasilactone 20mg/50mg capsules (Sanofi)                                                         | 808841000033119   | 3645811000001107  | Furosemide/<br>Spironolactone          |
| Spironolactone 50mg / Furosemide 20mg capsules                                                  | 3162541000033115  | 318102003         | Furosemide/<br>Spironolactone          |
| Frumil LS 20mg/2.5mg tablets (Sanofi)                                                           | 614341000033113   | 550711000001106   | Amiloride hydrochloride/<br>Furosemide |
| Co-amilofruse 2.5mg/20mg tablets                                                                | 376841000033113   | 318135008         | Amiloride hydrochloride/<br>Furosemide |
| Co-amilofruse 5mg/40mg tablets                                                                  | 376641000033112   | 318136009         | Amiloride hydrochloride/<br>Furosemide |
| Frumil 40mg/5mg tablets (Sanofi)                                                                | 614641000033117   | 427411000001106   | Amiloride hydrochloride/<br>Furosemide |

|                                                                                         |                  |                   |                                        |
|-----------------------------------------------------------------------------------------|------------------|-------------------|----------------------------------------|
| Froop Co 5mg/40mg tablets (Ashbourne Pharmaceuticals Ltd)                               | 1611441000033117 | 331311000001103   | Amiloride hydrochloride/<br>Furosemide |
| Lasoride 5mg/40mg tablets (Sanofi)                                                      | 818941000033112  | 678511000001106   | Amiloride hydrochloride/<br>Furosemide |
| Fru-Co 5mg/40mg tablets (Teva UK Ltd)                                                   | 615241000033116  | 818511000001106   | Amiloride hydrochloride/<br>Furosemide |
| Frumil Forte 10mg/80mg tablets (Sanofi)                                                 | 615641000033118  | 82611000001106    | Amiloride hydrochloride/<br>Furosemide |
| Co-amilofruse 10mg/80mg tablets                                                         | 376741000033115  | 318137000         | Amiloride hydrochloride/<br>Furosemide |
| Diumide-K Continus tablets (Teofarma)                                                   | 470541000033117  | 4540011000001102  | Furosemide/<br>Potassium chloride      |
| Furosemide 40mg / Potassium chloride 600mg (potassium 8mmol) modified-release tablets   | 3161841000033110 | 4557711000001102  | Furosemide/<br>Potassium chloride      |
| Co-amilofruse 5mg/40mg/5ml oral suspension                                              | 5710441000033117 | 8427011000001108  | Amiloride hydrochloride/<br>Furosemide |
| Furosemide 5mg/5ml oral solution                                                        | 3924941000033113 | 13893411000001108 | Furosemide                             |
| Furosemide 5mg/5ml oral suspension                                                      | 5993341000033112 | 13893511000001107 | Furosemide                             |
| Furosemide 250mg/25ml solution for injection ampoules                                   | 3954441000033119 | 34193711000001108 | Furosemide                             |
| Lasikal modified-release tablets (Borg Medicare)                                        | 816141000033114  | 3704811000001105  | Furosemide/<br>Potassium chloride      |
| Furosemide 20mg / Potassium chloride 750mg (potassium 10mmol) modified-release tablets  | 3162441000033116 | 36061311000001109 | Furosemide/<br>Potassium chloride      |
| Lasix 20mg/2ml solution for injection ampoules (Sanofi)                                 | 811841000033111  | 9611000001104     | Furosemide                             |
| Furosemide 20mg/2ml solution for injection ampoules                                     | 3091841000033115 | 36061411000001102 | Furosemide                             |
| Furosemide 50mg/5ml solution for injection ampoules                                     | 3091741000033113 | 36061511000001103 | Furosemide                             |
| Furosemide 80mg/8ml solution for injection Minijet pre-filled syringes (UCB Pharma Ltd) | 3092641000033111 | 2898811000001106  | Furosemide                             |
| Furosemide 80mg/8ml solution for injection pre-filled syringes                          | 3092541000033110 | 36061611000001104 | Furosemide                             |
| Frusol 50mg/5ml oral solution (Rosemont Pharmaceuticals Ltd)                            | 1731741000033111 | 855611000001109   | Furosemide                             |
| Furosemide 50mg/5ml oral solution sugar free                                            | 3092141000033118 | 36564411000001102 | Furosemide                             |
| Frusol 40mg/5ml oral solution (Rosemont Pharmaceuticals Ltd)                            | 1731641000033119 | 494811000001105   | Furosemide                             |
| Furosemide 40mg/5ml oral solution sugar free                                            | 3092041000033117 | 39021211000001101 | Furosemide                             |
| Frusol 20mg/5ml oral solution (Rosemont Pharmaceuticals Ltd)                            | 1731541000033115 | 602811000001100   | Furosemide                             |
| Furosemide 20mg/5ml oral solution sugar free                                            | 3091941000033111 | 39108611000001107 | Furosemide                             |
| Torasemide 2.5mg tablets                                                                | 1450241000033116 | 318040003         | Torasemide                             |
| Torem 2.5mg tablets (Mylan)                                                             | 1449941000033115 | 3699711000001107  | Torasemide                             |
| Torem 5mg tablets (Mylan)                                                               | 1450041000033112 | 3700311000001109  | Torasemide                             |
| Torasemide 5mg tablets                                                                  | 1450341000033114 | 318041004         | Torasemide                             |
| Torasemide 10mg tablets                                                                 | 1450141000033111 | 318042006         | Torasemide                             |





**Table S16. Gastrointestinal and intracranial Bleeding Aurum codes**

| Term                                                         | MedCode ID       | SNOMED CT Concept ID | SNOMED CT Description ID |
|--------------------------------------------------------------|------------------|----------------------|--------------------------|
| Cerebral haemorrhage                                         | 884421000006119  | 274100004            | 884421000006119          |
| External capsule haemorrhage                                 | 300276019        | 195167002            | 300276019                |
| Oesophageal varices with bleeding in diseases EC             | 300776018        | 195475003            | 300776018                |
| Oesophageal varices without bleeding in diseases EC          | 300779013        | 195476002            | 300779013                |
| H/O: GI Bleed                                                | 411546012        | 275551007            | 411546012                |
| Cerebral infarction with haemorrhagic transformation         | 1573101000006112 | 1573101000006108     | 1573101000006112         |
| H/O: upper GIT bleed                                         | 456218012        | 312489007            | 456218012                |
| History of subarachnoid haemorrhage                          | 4540691000006112 | 161515009            | 2986875019               |
| H/O: GIT bleed                                               | 5574481000006112 | 275551007            | 3036845016               |
| Duodenal ulcer with haemorrhage                              | 302534015        | 27281001             | 483490017                |
| Subarachnoid haemorrhage from middle cerebral artery         | 123511000006114  | 21454007             | 36011016                 |
| Subarachnoid haemorrhage from posterior communicating artery | 123521000006118  | 21454007             | 36011016                 |
| Left sided intracerebral haemorrhage, unspecified            | 748941000006115  | 274100004            | 409859018                |
| Traumatic subdural haematoma without open intracranial wound | 459511018        | 315046005            | 459511018                |
| Acute haemorrhagic pancreatitis                              | 493743018        | 4399003              | 493743018                |
| Chronic gastrojejunal ulcer with haemorrhage AND perforation | 494304013        | 45640006             | 494304013                |
| Internal capsule haemorrhage                                 | 496232015        | 52201006             | 496232015                |
| Subarachnoid haemorrhage from basilar artery                 | 123491000006115  | 276284000            | 412361011                |
| Traumatic intracerebral haemorrhage                          | 7378421000006118 | 450418003            | 2915664016               |
| Unspecified duodenal ulcer with haemorrhage and perforation  | 302537010        | 51868009             | 86362013                 |
| Unspecified gastrojejunal ulcer with haemorrhage             | 302606019        | 16121001             | 27283019                 |
| Gastro-oesophageal laceration-haemorrhage syndrome           | 3068361000006115 | 35265002             | 1216440014               |
| Intrapontine haemorrhage                                     | 2622631000006114 | 7713009              | 503468012                |
| Bleeding internal haemorrhoids                               | 3733931000006110 | 75884004             | 200553019                |
| Evacuation of extradural haematoma                           | 649541000006113  | 171713001            | 265968017                |
| Evacuation of haematoma from temporal lobe of brain          | 265689012        | 171473007            | 265689012                |
| Chronic peptic ulcer with haemorrhage AND perforation        | 498977018        | 61300005             | 498977018                |
| Haematemesis                                                 | 507679012        | 8765009              | 507679012                |
| Acute gastric ulcer with haemorrhage                         | 508664015        | 89748001             | 508664015                |
| Oesophageal varices with bleeding                            | 1216060010       | 17709002             | 1216060010               |
| Subdural haematoma evacuation                                | 3469891000006117 | 59712006             | 498519016                |
| Cerebral haemorrhage                                         | 989201000006117  | 274100004            | 989201000006117          |
| Evacuation of subdural haematoma                             | 3469851000006111 | 59712006             | 498516011                |
| Lobar cerebral haemorrhage                                   | 345675012        | 230710000            | 345675012                |
| SAH - Subarachnoid haemorrhage                               | 2841141000006111 | 21454007             | 1216125018               |
| Gastrointestinal bleeding                                    | 3710521000006115 | 74474003             | 123695010                |

|                                                                        |                   |                 |                 |
|------------------------------------------------------------------------|-------------------|-----------------|-----------------|
| GI bleeding                                                            | 3710501000006113  | 74474003        | 123689014       |
| Oversew of blood vessel of duodenal ulcer                              | 362951000000115   | 226891000000104 | 362951000000115 |
| Subperiosteal haematoma                                                | 933081000006112   | 669341000000103 | 933081000006112 |
| Subdural haemorrhage                                                   | 884441000006114   | 195176009       | 884441000006114 |
| DU - acute + haemorrhage                                               | 885851000006113   | 12847006        | 885851000006113 |
| PU - acute + haemorrhage                                               | 885941000006118   | 12274003        | 885941000006118 |
| PU - acute + h'ge + perf.                                              | 885961000006119   | 111353003       | 885961000006119 |
| PU - chronic + haemorrhage                                             | 885981000006112   | 49232000        | 885981000006112 |
| Upper GI - gastrointestinal haemorrhage                                | 3102201000006117  | 37372002        | 1216567017      |
| Right sided intracerebral haemorrhage, unspecified                     | 163261000006119   | 195168007       | 300277011       |
| Subarachnoid haemorrh from intracranial artery, unspecif               | 123441000006112   | 21454007        | 481028017       |
| Intracerebral haemorrhage                                              | 12223101000006118 | 274100004       | 3673215016      |
| Traumatic subdural haematoma                                           | 5459261000006114  | 262952002       | 2913152010      |
| Extradural haemorrhage                                                 | 884431000006116   | 397809001       | 884431000006116 |
| Gastrointestinal bleed                                                 | 802131000006119   | 74474003        | 1233753013      |
| Intracerebral haemorrhage NOS                                          | 300287010         | 274100004       | 2819959010      |
| Unspecified peptic ulcer with haemorrhage and perforation              | 302571018         | 13200003        | 22592012        |
| Intracerebral haemorrhage with intraventricular haemorrhage            | 4777861000006119  | 195168007       | 2915438018      |
| Intracranial haemorrhage following injury                              | 7378271000006116  | 450410005       | 2915426010      |
| Endoscopic injection haemostasis of duodenal ulcer                     | 459010010         | 314627002       | 459010010       |
| Oesophageal varices with bleeding, associated with another disorder    | 4779721000006113  | 195475003       | 2575715017      |
| Non-traumatic subdural haemorrhage                                     | 2475119012        | 195176009       | 2469010019      |
| Upper GI haemorrhage                                                   | 3102191000006115  | 37372002        | 486703016       |
| Evacuation of intracerebral haematoma                                  | 265692011         | 10458001        | 279429014       |
| Gastric haemorrhage                                                    | 303660017         | 61401005        | 499003013       |
| Cerebral haemorrhage                                                   | 122371000006118   | 274100004       | 409860011       |
| [X]Other subarachnoid haemorrhage                                      | 300936018         | 21454007        | 481028017       |
| Subarachnoid haemorrhage following injury with open intracranial wound | 320735017         | 5251007         | 496337012       |
| Traumatic subdural hematoma                                            | 391035012         | 262952002       | 2912898019      |
| Subarachnoid haemorrhage from basilar artery aneurysm                  | 5583101000006116  | 276284000       | 412361011       |
| Bleeding gastric ulcer                                                 | 2752321000006114  | 15902003        | 1221244018      |
| Sequelae of intracerebral haemorrhage                                  | 300407010         | 195241001       | 300407010       |
| Traumatic cranial subdural haematoma                                   | 5459221000006115  | 262952002       | 391036013       |
| Oesophageal haemorrhage                                                | 2741641000006118  | 15238002        | 477249012       |
| Intestinal haemorrhage NOS                                             | 303663015         | 74474003        | 123688018       |
| Intracerebral haemorrhage, multiple localised                          | 4777881000006112  | 195169004       | 300280012       |
| Cerebral haemorrhage NOS                                               | 989211000006119   | 274100004       | 989211000006119 |
| GU - acute + h'ge + perf.                                              | 885791000006113   | 48974009        | 885791000006113 |
| GU - chronic + haemorrhage                                             | 885811000006112   | 57246001        | 885811000006112 |
| GU - chronic + h'ge + perf.                                            | 885831000006118   | 76181002        | 885831000006118 |

|                                                              |                   |                 |                 |
|--------------------------------------------------------------|-------------------|-----------------|-----------------|
| PU - chronic + h'ge + perf.                                  | 886001000006111   | 61300005        | 886001000006111 |
| Intracerebral haemorrhage (ICH)                              | 744901000006114   | 274100004       | 2819959010      |
| Cortical haemorrhage                                         | 495394013         | 49422009        | 495394013       |
| Cerebellar haemorrhage                                       | 502878012         | 75038005        | 502878012       |
| Bleeding chronic gastric ulcer                               | 1231704018        | 57246001        | 1231704018      |
| ICH - intracerebral haemorrhage                              | 12223121000006111 | 274100004       | 3673217012      |
| Bulbar haemorrhage                                           | 483988011         | 732923001       | 3467313018      |
| Acute peptic ulcer with haemorrhage and perforation          | 361430016         | 111353003       | 361430016       |
| Choroidal haemorrhage                                        | 297943011         | 122003          | 1256014         |
| Chronic gastric ulcer with haemorrhage AND with perforation  | 554311000006114   | 76181002        | 503219010       |
| Nontraumatic extradural haemorrhage                          | 660111000006117   | 397809001       | 1773153015      |
| Evacuation of haematoma from cerebellum                      | 265690015         | 171474001       | 265690015       |
| Gastrotomy and ligation of bleeding point of stomach         | 269184010         | 173778009       | 269184010       |
| Melaena                                                      | 5913016           | 2901004         | 5913016         |
| Unspec peptic ulcer; unspec haemorrhage and/or perforation   | 81501000006111    | 13200003        | 22592012        |
| Bleeding chronic duodenal ulcer                              | 1235462014        | 89469000        | 1235462014      |
| Gastrointestinal tract haemorrhage NOS                       | 303667019         | 74474003        | 123688018       |
| Subarachnoid haemorrhage from anterior communicating artery  | 123481000006118   | 21454007        | 36011016        |
| Ruptured berry aneurysm                                      | 300242011         | 195154000       | 300242011       |
| Subarachnoid haemorrhage from carotid siphon and bifurcation | 300244012         | 195155004       | 300244012       |
| Subarachnoid haemorrhage from vertebral artery               | 300253017         | 195160000       | 300253017       |
| Subdural haemorrhage - nontraumatic                          | 300294013         | 195176009       | 300294013       |
| Sequelae of subarachnoid haemorrhage                         | 300406018         | 195240000       | 300406018       |
| Duodenal ulcer with perforation                              | 302535019         | 88968005        | 147516013       |
| Subdural haemorrhage                                         | 2534198011        | 35486000        | 486181011       |
| Gastric ulcer with haemorrhage AND perforation               | 81311000006115    | 62366003        | 499256017       |
| Corpus cavernosum haematoma                                  | 304493010         | 198031007       | 304493010       |
| History of gastrointestinal bleed                            | 397836015         | 275551007       | 411546012       |
| GI - Gastrointestinal haemorrhage                            | 3710541000006110  | 74474003        | 1216914011      |
| Intracerebral haemorrhage in hemisphere, unspecified         | 744921000006116   | 274100004       | 409860011       |
| Intracerebral haemorrhage, multiple localized                | 746571000006116   | 195169004       | 300280012       |
| Cerebral haemorrhage                                         | 300939013         | 274100004       | 409860011       |
| H/O: haematemesis                                            | 251739019         | 161538007       | 251739019       |
| Cerebral haemorrhage NOS                                     | 884451000006111   | 700251000000105 | 884451000006111 |
| Bleeding oesophageal varices                                 | 2781011000006119  | 17709002        | 478405010       |
| Gastrointestinal hemorrhage                                  | 396403016         | 74474003        | 502715010       |
| Unspec duodenal ulcer; unspec haemorrhage and/or perforation | 81301000006118    | 51868009        | 86362013        |
| Sequelae of other nontraumatic intracranial haemorrhage      | 149551000006111   | 363302008       | 482447013       |
| DU - chronic + haemorrhage                                   | 885891000006119   | 89469000        | 885891000006119 |

|                                                            |                  |           |            |
|------------------------------------------------------------|------------------|-----------|------------|
| Acute duodenal ulcer with haemorrhage                      | 474430017        | 12847006  | 474430017  |
| Basal ganglia haemorrhage                                  | 503791000006114  | 195165005 | 300272017  |
| H/O: upper GIT haemorrhage                                 | 456217019        | 312489007 | 456217019  |
| Acute peptic ulcer with haemorrhage                        | 470365013        | 12274003  | 470365013  |
| Gastric bleeding                                           | 3497621000006112 | 61401005  | 102011018  |
| Intracerebral haemorrhage, intraventricular                | 300277011        | 195168007 | 300277011  |
| Intracranial haemorrhage                                   | 300298011        | 1386000   | 475553012  |
| Haemorrhage                                                | 300840014        | 131148009 | 3035879011 |
| Subarachnoid haemorrhage NOS                               | 300257016        | 21454007  | 481028017  |
| Unspecified gastric ulcer with haemorrhage and perforation | 302490012        | 62366003  | 499256017  |
| Unspecified peptic ulcer with haemorrhage                  | 302568014        | 13200003  | 22592012   |
| Subarachnoid haemorrhage                                   | 481028017        | 21454007  | 481028017  |
| [X]Intracerebral haemorrhage in hemisphere, unspecified    | 300956017        | 274100004 | 409860011  |
| Pontine haemorrhage                                        | 503469016        | 7713009   | 503469016  |
| Acute gastrojejunal ulcer with haemorrhage AND perforation | 504674011        | 81387001  | 504674011  |
| Cerebral haemorrhage following injury                      | 505322013        | 450418003 | 2916363013 |
| Traumatic cerebral haemorrhage                             | 505324014        | 450418003 | 2916058017 |
| Lower gastrointestinal haemorrhage                         | 507736019        | 87763006  | 507736019  |
| Evacuation of intracranial extradural haematoma            | 4645641000006117 | 171713001 | 265968017  |
| Bleeding haemorrhoids                                      | 300752014        | 51551000  | 198339016  |
| Gastric ulcer with haemorrhage                             | 302487018        | 15902003  | 477573015  |
| GI haemorrhage                                             | 3710531000006117 | 74474003  | 502714014  |
| H/O subarachnoid haemorrhage                               | 808111000006110  | 161515009 | 251701010  |
| Traumatic subdural haematoma with open intracranial wound  | 459514014        | 315047001 | 459514014  |
| Upper gastrointestinal haemorrhage                         | 486704010        | 37372002  | 486704010  |
| Acute gastric ulcer with haemorrhage AND perforation       | 495273013        | 48974009  | 495273013  |
| Chronic gastric ulcer with haemorrhage                     | 497833010        | 57246001  | 497833010  |
| Evacuation of intracranial subdural haematoma              | 498516011        | 59712006  | 498520010  |
| Oesophageal bleeding                                       | 2741601000006115 | 15238002  | 477250012  |
| Other and unspecified intracranial haemorrhage             | 300290016        | 62914000  | 104563015  |
| Epidural haemorrhage                                       | 505381016        | 82999001  | 505381016  |
| Cerebral hemorrhage                                        | 605471000006112  | 274100004 | 409859018  |
| Haemorrhage of oesophagus                                  | 477248016        | 15238002  | 477248016  |
| Acute haemorrhagic gastritis                               | 478553011        | 2367005   | 481682019  |
| Chronic duodenal ulcer with haemorrhage AND perforation    | 486596015        | 36975000  | 486596015  |
| Chronic peptic ulcer with haemorrhage                      | 495344012        | 49232000  | 495344012  |
| Acute gastrojejunal ulcer with haemorrhage                 | 499719010        | 63954007  | 499719010  |
| Gastrointestinal haemorrhage                               | 502715010        | 74474003  | 502715010  |
| Acute duodenal ulcer with haemorrhage AND perforation      | 507303017        | 86895006  | 507303017  |
| Chronic gastrojejunal ulcer with haemorrhage               | 499386010        | 62838000  | 499386010  |

|                                                                         |                  |           |                 |
|-------------------------------------------------------------------------|------------------|-----------|-----------------|
| Chronic duodenal ulcer with haemorrhage                                 | 508524014        | 89469000  | 508524014       |
| Bleeding acute gastric ulcer                                            | 1235493010       | 89748001  | 1235493010      |
| Extradural haemorrhage following injury without open intracranial wound | 402930018        | 43216008  | 493552012       |
| Upper GI bleeding                                                       | 3102181000006118 | 37372002  | 62348012        |
| GU - acute + haemorrhage                                                | 885771000006112  | 89748001  | 885771000006112 |
| History of upper gastrointestinal tract haemorrhage                     | 6017201000006118 | 312489007 | 2986370018      |

**Table S17. Gastrointestinal tract ulcer Aurum codes**

| Term                                                                                | Medcode ID        | SNOMED CT<br>Concept ID | SNOMED CT<br>Description ID |
|-------------------------------------------------------------------------------------|-------------------|-------------------------|-----------------------------|
| Acute duodenal ulcer with hemorrhage AND obstruction                                | 3926261000006112  | 87756006                | 145494013                   |
| Acute gastrojejunal ulcer with hemorrhage AND perforation                           | 3823411000006113  | 81387001                | 135007015                   |
| Acute gastrojejunal ulcer with perforation but without obstruction                  | 3677391000006113  | 72395008                | 120279015                   |
| Chronic duodenal ulcer with hemorrhage                                              | 3954241000006119  | 89469000                | 148344012                   |
| Unspec gastrojejunal ulcer; unspec haemorrhage/perforation                          | 81331000006114    | 16121001                | 27283019                    |
| Acute gastric ulcer with haemorrhage, with perforation AND with obstruction         | 3365071000006116  | 53337006                | 496625019                   |
| Duodenal ulcer with haemorrhage                                                     | 2937121000006115  | 27281001                | 2937121000006115            |
| Duodenal ulcer with haemorrhage                                                     | 302534015         | 27281001                | 483490017                   |
| Gastrojejunal ulcer with hemorrhage but without obstruction                         | 3320581000006112  | 50663005                | 84434015                    |
| Chronic gastrojejunal ulcer with haemorrhage, with perforation AND with obstruction | 2882871000006112  | 24001002                | 481784011                   |
| Peptic ulcer with hemorrhage, with perforation AND with obstruction                 | 2919721000006119  | 26221006                | 43926010                    |
| Chronic duodenal ulcer with perforation but without obstruction                     | 3057061000006111  | 34602004                | 57742016                    |
| Perforated chronic gastric ulcer                                                    | 484836012         | 31301004                | 484836012                   |
| Chronic gastrojejunal ulcer with haemorrhage AND perforation                        | 494304013         | 45640006                | 494304013                   |
| Unspecified duodenal ulcer with haemorrhage and perforation                         | 302537010         | 51868009                | 86362013                    |
| Unspecified peptic ulcer with perforation                                           | 302569018         | 13200003                | 22592012                    |
| Unspecified gastrojejunal ulcer with haemorrhage                                    | 302606019         | 16121001                | 27283019                    |
| Duodenal ulcer with hemorrhage                                                      | 11902881000006118 | 27281001                | 45608011                    |
| Chronic peptic ulcer with haemorrhage AND perforation                               | 498977018         | 61300005                | 498977018                   |
| Acute gastric ulcer with haemorrhage                                                | 508664015         | 89748001                | 508664015                   |
| Duodenal ulcer with hemorrhage but without obstruction                              | 3072881000006114  | 35560008                | 59330018                    |
| Acute peptic ulcer with hemorrhage AND with perforation but without obstruction     | 3260961000006111  | 47064007                | 78447013                    |
| Acute peptic ulcer NOS                                                              | 12721881000006113 | 591741000000105         | 1312001000000116            |
| Chronic gastric ulcer with haemorrhage AND with obstruction                         | 3895591000006110  | 85859006                | 506779011                   |
| DU - acute NOS                                                                      | 885881000006117   | 618291000000105         | 885881000006117             |
| DU - acute + haemorrhage                                                            | 885851000006113   | 12847006                | 885851000006113             |
| DU - acute + perforation                                                            | 885861000006110   | 61347001                | 885861000006110             |
| DU - chronic + h'ge + perf.                                                         | 885911000006117   | 36975000                | 885911000006117             |
| PU - acute + haemorrhage                                                            | 885941000006118   | 12274003                | 885941000006118             |
| PU - acute + perforation                                                            | 885951000006116   | 79118000                | 885951000006116             |
| PU - acute + h'ge + perf.                                                           | 885961000006119   | 111353003               | 885961000006119             |
| PU - chronic + haemorrhage                                                          | 885981000006112   | 49232000                | 885981000006112             |
| Acute peptic ulcer with hemorrhage and perforation                                  | 4194481000006117  | 111353003               | 90139013                    |
| Gastrojejunal ulcer with haemorrhage but without obstruction                        | 3320571000006114  | 50663005                | 495743015                   |

|                                                                                         |                  |           |                 |
|-----------------------------------------------------------------------------------------|------------------|-----------|-----------------|
| Acute gastric ulcer with hemorrhage, with perforation AND with obstruction              | 3365081000006118 | 53337006  | 88690011        |
| Gastrojejunal ulcer with haemorrhage AND with perforation but without obstruction       | 3926841000006112 | 87796008  | 507754015       |
| Esophageal bleeding due to ulcerative esophagitis                                       | 7222991000006116 | 439442003 | 2794960012      |
| Chronic duodenal ulcer with haemorrhage but without obstruction                         | 3513251000006119 | 62341002  | 499253013       |
| Acute duodenal ulcer with hemorrhage AND with perforation but without obstruction       | 3340401000006119 | 51847008  | 86331014        |
| Peptic ulcer with hemorrhage                                                            | 3542821000006112 | 64121000  | 106588013       |
| Gastric ulcer with haemorrhage AND perforation but without obstruction                  | 2531561000006115 | 2066005   | 480818019       |
| Acute gastrojejunal ulcer with hemorrhage                                               | 3539941000006116 | 63954007  | 106302011       |
| Chronic gastrojejunal ulcer with hemorrhage AND perforation                             | 3236981000006112 | 45640006  | 76108010        |
| GU - acute + perforation                                                                | 885781000006110  | 19850005  | 885781000006110 |
| GU - chronic + perforation                                                              | 885821000006116  | 31301004  | 885821000006116 |
| Acute duodenal ulcer with haemorrhage AND obstruction                                   | 3926251000006110 | 87756006  | 507729015       |
| Acute gastric ulcer with perforation AND obstruction                                    | 3203661000006112 | 43694004  | 72854019        |
| Unspecified peptic ulcer with haemorrhage and perforation                               | 302571018        | 13200003  | 22592012        |
| Unspecified gastrojejunal ulcer with perforation                                        | 302608018        | 16121001  | 27283019        |
| Acute peptic ulcer with perforation                                                     | 131281018        | 79118000  | 131281018       |
| Chronic peptic ulcer with hemorrhage AND obstruction                                    | 3417381000006115 | 56461008  | 93897011        |
| Acute gastric ulcer with hemorrhage AND perforation                                     | 3292411000006119 | 48974009  | 81590012        |
| Chronic peptic ulcer with hemorrhage                                                    | 3296621000006114 | 49232000  | 82009014        |
| Acute duodenal ulcer with perforation but without obstruction                           | 2858711000006118 | 22511002  | 37788015        |
| Chronic gastrojejunal ulcer with hemorrhage but without perforation                     | 3463971000006114 | 59356009  | 98589012        |
| Acute peptic ulcer without hemorrhage, without perforation AND without obstruction      | 2547461000006113 | 3023008   | 6131012         |
| Gastric ulcer with haemorrhage, with perforation AND with obstruction                   | 2779151000006110 | 17593008  | 478382011       |
| Chronic duodenal ulcer with haemorrhage AND with perforation but without obstruction    | 3819871000006111 | 81142005  | 504625010       |
| Chronic gastric ulcer without haemorrhage, without perforation AND without obstruction  | 2523571000006111 | 1567007   | 477462013       |
| Chronic gastric ulcer with haemorrhage AND with perforation but without obstruction     | 3708391000006114 | 74341002  | 502673018       |
| Acute gastrojejunal ulcer with haemorrhage but without obstruction                      | 3466621000006113 | 59515005  | 498459015       |
| Duodenal ulcer with haemorrhage AND perforation                                         | 2879911000006114 | 23812009  | 481717012       |
| Acute gastrojejunal ulcer with haemorrhage AND obstruction                              | 3677531000006115 | 72408002  | 502115017       |
| Acute gastrojejunal ulcer with haemorrhage AND with perforation but without obstruction | 3584201000006119 | 66673003  | 500495015       |
| Chronic peptic ulcer with hemorrhage but without obstruction                            | 3825521000006119 | 81518000  | 135230017       |
| Chronic peptic ulcer with haemorrhage AND with perforation but without obstruction      | 3405521000006119 | 55746001  | 497387014       |
| Bleeding ulcer of oesophagus                                                            | 3438281000006118 | 57748001  | 497976013       |
| Gastric ulcer with hemorrhage, with perforation AND with obstruction                    | 2779161000006112 | 17593008  | 29732013        |



|                                                                                     |                  |           |            |
|-------------------------------------------------------------------------------------|------------------|-----------|------------|
| Gastrojejunal ulcer with hemorrhage AND with perforation but without obstruction    | 3926851000006114 | 87796008  | 145560014  |
| Acute peptic ulcer with perforation AND obstruction                                 | 3074551000006112 | 35681000  | 59518011   |
| Chronic gastric ulcer with hemorrhage AND with perforation                          | 3739191000006114 | 76181002  | 126521010  |
| Chronic duodenal ulcer with hemorrhage, with perforation AND with obstruction       | 3902501000006117 | 86258000  | 143049014  |
| Chronic duodenal ulcer with hemorrhage but without obstruction                      | 3513261000006117 | 62341002  | 103623018  |
| Acute gastric ulcer with haemorrhage AND obstruction                                | 3254501000006115 | 46708007  | 494593012  |
| Acute bleeding ulcer                                                                | 3239141000006110 | 45771005  | 76330018   |
| Acute gastric ulcer with haemorrhage but without obstruction                        | 3645271000006113 | 70418001  | 501576019  |
| Bleeding peptic ulcer                                                               | 3542831000006110 | 64121000  | 1232530018 |
| Gastrojejunal ulcer without hemorrhage AND without perforation                      | 2543301000006112 | 2783007   | 5708013    |
| Duodenal ulcer with hemorrhage AND obstruction                                      | 2791911000006117 | 18367003  | 31008016   |
| Bleeding stress ulcer of stomach                                                    | 5982901000006117 | 308882008 | 452259016  |
| Gastric ulcer with hemorrhage                                                       | 2752311000006118 | 15902003  | 26937011   |
| Chronic gastric ulcer with hemorrhage, with perforation AND with obstruction        | 3894481000006112 | 85787009  | 142209015  |
| Chronic duodenal ulcer with hemorrhage AND with perforation but without obstruction | 3819881000006114 | 81142005  | 134627014  |
| Peptic ulcer with haemorrhage AND with perforation but without obstruction          | 3970661000006113 | 90489006  | 509021016  |
| Gastrojejunal ulcer without haemorrhage AND without perforation                     | 2543291000006111 | 2783007   | 483682014  |
| Chronic gastrojejunal ulcer with hemorrhage AND obstruction                         | 3967191000006116 | 90257004  | 149607014  |
| Chronic gastric ulcer with haemorrhage but without obstruction                      | 3737501000006117 | 76078009  | 503190016  |
| Acute duodenal ulcer with hemorrhage                                                | 2704011000006118 | 12847006  | 22034017   |
| Acute peptic ulcer with haemorrhage but without obstruction                         | 2852931000006111 | 22157005  | 481240010  |
| Acute duodenal ulcer with hemorrhage but without obstruction                        | 3585601000006117 | 66767006  | 110913018  |
| Gastric ulcer with hemorrhage but without obstruction                               | 2764921000006114 | 16694003  | 28271019   |
| Acute duodenal ulcer with haemorrhage but without obstruction                       | 3585591000006113 | 66767006  | 500520016  |
| Acute peptic ulcer with perforation but without obstruction                         | 3062531000006115 | 34921009  | 58276010   |
| Peptic ulcer with hemorrhage AND perforation                                        | 3403141000006119 | 55617001  | 92455015   |
| Peptic ulcer with haemorrhage AND obstruction                                       | 3547581000006111 | 64398008  | 499847018  |
| Haemorrhagic ulcer of oesophagus                                                    | 3438311000006116 | 57748001  | 497977016  |
| Chronic gastric ulcer with hemorrhage AND with obstruction                          | 3895601000006119 | 85859006  | 142332019  |
| Giant duodenal ulcer                                                                | 3619491000006117 | 68834009  | 114337018  |
| Chronic peptic ulcer with perforation but without obstruction                       | 3816621000006116 | 80953005  | 134291011  |
| Bleeding duodenal ulcer                                                             | 2937141000006110 | 27281001  | 1225269012 |
| Bleeding gastric ulcer                                                              | 2752321000006114 | 15902003  | 1221244018 |
| Gastrojejunal ulcer with haemorrhage AND obstruction                                | 3188241000006116 | 42698006  | 493421013  |

|                                                                                   |                   |                 |                  |
|-----------------------------------------------------------------------------------|-------------------|-----------------|------------------|
| Chronic peptic ulcer with hemorrhage, with perforation AND with obstruction       | 3763481000006114  | 77661009        | 128895010        |
| Acute gastrojejunal ulcer with hemorrhage AND obstruction                         | 3677541000006113  | 72408002        | 120295015        |
| Chronic duodenal ulcer with haemorrhage AND obstruction                           | 3047841000006117  | 34021006        | 485720014        |
| Acute gastric ulcer with hemorrhage but without obstruction                       | 3645281000006111  | 70418001        | 116984014        |
| Gastric ulcer with haemorrhage AND obstruction                                    | 3373651000006112  | 53877005        | 496788013        |
| Chronic gastric ulcer with perforation but without obstruction                    | 3084181000006117  | 36246001        | 60497010         |
| Acute duodenal ulcer with perforation AND obstruction                             | 3523071000006113  | 62936002        | 104600011        |
| Gastric ulcer with hemorrhage AND obstruction                                     | 3373661000006114  | 53877005        | 89552015         |
| Peptic ulcer with haemorrhage but without obstruction                             | 3287291000006112  | 48658001        | 495168013        |
| Chronic peptic ulcer with hemorrhage AND with perforation but without obstruction | 3405531000006116  | 55746001        | 92690019         |
| Peptic ulcer with haemorrhage                                                     | 3542811000006116  | 64121000        | 499762011        |
| Gastrojejunal ulcer with hemorrhage AND perforation                               | 3542351000006113  | 64094003        | 106539013        |
| Duodenal ulcer with haemorrhage, with perforation AND with obstruction            | 2696661000006114  | 12355008        | 472362019        |
| Acute gastric ulcer NOS                                                           | 12724281000006114 | 606391000000100 | 1341841000000112 |
| Chronic duodenal ulcer with haemorrhage, with perforation AND with obstruction    | 3902491000006113  | 86258000        | 507005018        |
| Duodenal ulcer with haemorrhage AND obstruction                                   | 2791901000006115  | 18367003        | 478566011        |
| Duodenal ulcer with haemorrhage but without obstruction                           | 3072871000006111  | 35560008        | 486208012        |
| GU - acute + h'ge + perf.                                                         | 885791000006113   | 48974009        | 885791000006113  |
| GU - chronic + haemorrhage                                                        | 885811000006112   | 57246001        | 885811000006112  |
| GU - chronic + h'ge + perf.                                                       | 885831000006118   | 76181002        | 885831000006118  |
| DU - chronic + perforation                                                        | 885901000006115   | 49916007        | 885901000006115  |
| PU - chronic + h'ge + perf.                                                       | 886001000006111   | 61300005        | 886001000006111  |
| Acute gastric ulcer with haemorrhage AND with perforation but without obstruction | 2770951000006116  | 17067009        | 478052011        |
| Acute duodenal ulcer with haemorrhage, with perforation AND with obstruction      | 3176721000006111  | 41986000        | 493172010        |
| Acute duodenal ulcer NOS                                                          | 12730031000006113 | 618291000000105 | 1365771000000117 |
| Acute peptic ulcer with hemorrhage but without obstruction                        | 2852941000006118  | 22157005        | 37201012         |
| Perforated ulcer                                                                  | 3981721000006111  | 91182001        | 151086014        |
| Bleeding chronic gastric ulcer                                                    | 1231704018        | 57246001        | 1231704018       |
| Oesophageal bleeding due to ulcerative oesophagitis                               | 7222981000006119  | 439442003       | 2790933013       |
| Acute peptic ulcer with haemorrhage AND with perforation but without obstruction  | 3260951000006114  | 47064007        | 494746019        |
| Bleeding oesophageal ulcer                                                        | 3438321000006112  | 57748001        | 3027281014       |
| Acute peptic ulcer with haemorrhage and perforation                               | 361430016         | 111353003       | 361430016        |
| Chronic duodenal ulcer with hemorrhage AND perforation                            | 3095701000006110  | 36975000        | 61676011         |
| Gastric ulcer with hemorrhage AND perforation                                     | 3513611000006117  | 62366003        | 103655018        |
| Acute gastric ulcer with bleeding                                                 | 3958891000006118  | 89748001        | 148790018        |

|                                                                                        |                  |                 |                 |
|----------------------------------------------------------------------------------------|------------------|-----------------|-----------------|
| Chronic gastric ulcer with haemorrhage AND with perforation                            | 554311000006114  | 76181002        | 503219010       |
| Chronic gastric ulcer with perforation AND with obstruction                            | 3400861000006115 | 55483002        | 92236018        |
| Chronic gastrojejunal ulcer with perforation                                           | 5742016          | 2807004         | 5742016         |
| Unspec peptic ulcer; unspec haemorrhage and/or perforation                             | 81501000006111   | 13200003        | 22592012        |
| Bleeding chronic duodenal ulcer                                                        | 1235462014       | 89469000        | 1235462014      |
| Peptic ulcer with hemorrhage but without obstruction                                   | 3287301000006113 | 48658001        | 81073011        |
| Bleeding esophageal ulcer                                                              | 3438331000006110 | 57748001        | 3027309010      |
| Chronic gastrojejunal ulcer with hemorrhage                                            | 3521501000006114 | 62838000        | 104433010       |
| Duodenal ulcer with perforation                                                        | 302535019        | 88968005        | 147516013       |
| Gastric ulcer with haemorrhage AND perforation                                         | 81311000006115   | 62366003        | 499256017       |
| PU - acute NOS                                                                         | 885971000006114  | 591741000000105 | 885971000006114 |
| Peptic ulcer with hemorrhage AND obstruction                                           | 3547591000006114 | 64398008        | 107045019       |
| Bleeding ulcer of esophagus                                                            | 3438291000006115 | 57748001        | 96029011        |
| Acute gastrojejunal ulcer with hemorrhage, with perforation AND with obstruction       | 3453731000006116 | 58711008        | 97562017        |
| Acute gastrojejunal ulcer with hemorrhage but without obstruction                      | 3466631000006111 | 59515005        | 98850013        |
| Chronic gastric ulcer with hemorrhage but without obstruction                          | 3737511000006119 | 76078009        | 126363010       |
| Acute gastric ulcer with hemorrhage AND obstruction                                    | 3254511000006117 | 46708007        | 77847018        |
| Acute gastric ulcer with hemorrhage AND with perforation but without obstruction       | 2770961000006119 | 17067009        | 28881013        |
| DU - acute NOS                                                                         | 990721000006111  | 196652006       | 990721000006111 |
| Unspec duodenal ulcer; unspec haemorrhage and/or perforation                           | 81301000006118   | 51868009        | 86362013        |
| DU - chronic + haemorrhage                                                             | 885891000006119  | 89469000        | 885891000006119 |
| PU - chronic + perforation                                                             | 885991000006110  | 3483000         | 885991000006110 |
| Acute duodenal ulcer with haemorrhage                                                  | 474430017        | 12847006        | 474430017       |
| Chronic gastrojejunal ulcer with hemorrhage, with perforation AND with obstruction     | 2882881000006110 | 24001002        | 40293019        |
| Chronic duodenal ulcer with perforation                                                | 83140013         | 49916007        | 83140013        |
| Acute peptic ulcer with haemorrhage                                                    | 470365013        | 12274003        | 470365013       |
| Duodenal ulcer with perforation AND obstruction                                        | 3759241000006113 | 77410006        | 128499012       |
| Chronic peptic ulcer with perforation AND obstruction                                  | 3440281000006115 | 57871005        | 96224010        |
| Acute peptic ulcer with hemorrhage AND obstruction                                     | 3199311000006117 | 43406003        | 72407011        |
| Duodenal ulcer with haemorrhage AND with perforation but without obstruction           | 2739541000006116 | 15115006        | 477132014       |
| Barrett's ulcer of oesophagus                                                          | 302387019        | 196609006       | 302387019       |
| Acute gastrojejunal ulcer with hemorrhage AND with perforation but without obstruction | 3584211000006116 | 66673003        | 110759011       |
| Gastric ulcer with perforation                                                         | 302489015        | 9829001         | 17164015        |
| Chronic gastric ulcer with hemorrhage AND with perforation but without obstruction     | 3708401000006111 | 74341002        | 123454019       |
| Gastrojejunal ulcer with haemorrhage, with perforation AND with obstruction            | 3389331000006116 | 54798007        | 497049011       |
| Unspecified gastric ulcer with haemorrhage and perforation                             | 302490012        | 62366003        | 499256017       |

|                                                                                          |                  |          |           |
|------------------------------------------------------------------------------------------|------------------|----------|-----------|
| Unspecified peptic ulcer with haemorrhage                                                | 302568014        | 13200003 | 22592012  |
| Chronic gastric ulcer with haemorrhage, with perforation AND with obstruction            | 3894471000006114 | 85787009 | 506732011 |
| Peptic ulcer with perforation AND obstruction                                            | 3281961000006115 | 48336009 | 80529013  |
| Gastrojejunal ulcer with haemorrhage AND perforation                                     | 3542341000006111 | 64094003 | 499758017 |
| Acute gastric ulcer                                                                      | 158227015        | 95529005 | 158227015 |
| Gastrojejunal ulcer with haemorrhage                                                     | 3868431000006116 | 84124004 | 505930017 |
| Acute peptic ulcer with hemorrhage, with perforation AND with obstruction                | 2965441000006115 | 28945005 | 48463010  |
| Gastrojejunal ulcer with hemorrhage AND obstruction                                      | 3188251000006119 | 42698006 | 71244011  |
| Peptic ulcer with haemorrhage, with perforation AND with obstruction                     | 2919711000006110 | 26221006 | 483152019 |
| Gastric ulcer with perforation AND obstruction                                           | 3678661000006114 | 72486001 | 120408012 |
| Duodenal ulcer with hemorrhage, with perforation AND with obstruction                    | 2696671000006119 | 12355008 | 21266019  |
| Acute gastrojejunal ulcer with haemorrhage AND perforation                               | 504674011        | 81387001 | 504674011 |
| Gastric ulcer with hemorrhage AND perforation but without obstruction                    | 2531571000006110 | 2066005  | 4556011   |
| Acute peptic ulcer without haemorrhage, without perforation AND without obstruction      | 2547451000006111 | 3023008  | 484524010 |
| Acute gastric ulcer with hemorrhage                                                      | 3958881000006116 | 89748001 | 148789010 |
| Chronic gastrojejunal ulcer with hemorrhage AND with perforation but without obstruction | 3251351000006110 | 46523000 | 77544017  |
| Chronic gastrojejunal ulcer with perforation but without obstruction                     | 3515751000006113 | 62477005 | 103838019 |
| Acute duodenal ulcer with hemorrhage AND perforation                                     | 3912771000006119 | 86895006 | 144111018 |
| Gastric ulcer with haemorrhage                                                           | 302487018        | 15902003 | 477573015 |
| Acute peptic ulcer with haemorrhage, with perforation AND with obstruction               | 2965431000006113 | 28945005 | 484017015 |
| Chronic gastrojejunal ulcer with haemorrhage AND obstruction                             | 3967181000006119 | 90257004 | 508918010 |
| Peptic ulcer with haemorrhage AND perforation                                            | 3403131000006112 | 55617001 | 497320014 |
| Chronic duodenal ulcer with hemorrhage AND obstruction                                   | 3047851000006115 | 34021006 | 56818016  |
| Chronic peptic ulcer with haemorrhage but without obstruction                            | 3825511000006110 | 81518000 | 504712012 |
| Hemorrhagic ulcer of esophagus                                                           | 3438301000006119 | 57748001 | 96030018  |
| Chronic peptic ulcer with hemorrhage AND perforation                                     | 3496021000006116 | 61300005 | 101859019 |
| Acute gastrojejunal ulcer with perforation AND obstruction                               | 3674881000006110 | 72219001 | 120001014 |
| Gastrojejunal ulcer with perforation AND obstruction                                     | 2846221000006119 | 21759003 | 36512017  |
| Acute gastrojejunal ulcer with haemorrhage, with perforation AND with obstruction        | 3453721000006119 | 58711008 | 498229010 |
| Acute gastric ulcer with haemorrhage AND perforation                                     | 495273013        | 48974009 | 495273013 |
| Chronic gastric ulcer with haemorrhage                                                   | 497833010        | 57246001 | 497833010 |
| Acute duodenal ulcer with hemorrhage, with perforation AND with obstruction              | 3176731000006114 | 41986000 | 70069011  |
| Chronic gastric ulcer with hemorrhage                                                    | 3430281000006116 | 57246001 | 95214011  |
| Bleeding ulcer                                                                           | 3393951000006114 | 55075001 | 91564012  |

|                                                                                           |                  |          |                 |
|-------------------------------------------------------------------------------------------|------------------|----------|-----------------|
| Chronic gastric ulcer without hemorrhage, without perforation AND without obstruction     | 2523581000006114 | 1567007  | 3721015         |
| Chronic peptic ulcer with haemorrhage, with perforation AND with obstruction              | 3763471000006111 | 77661009 | 503637019       |
| Duodenal ulcer with hemorrhage AND perforation                                            | 2879921000006118 | 23812009 | 39977013        |
| Chronic duodenal ulcer with perforation AND obstruction                                   | 3483491000006119 | 60551006 | 100598014       |
| Duodenal ulcer with perforation but without obstruction                                   | 3914141000006116 | 86983005 | 144261016       |
| Peptic ulcer with hemorrhage AND with perforation but without obstruction                 | 3970671000006118 | 90489006 | 149975019       |
| Chronic duodenal ulcer with haemorrhage AND perforation                                   | 486596015        | 36975000 | 486596015       |
| Chronic peptic ulcer with haemorrhage                                                     | 495344012        | 49232000 | 495344012       |
| Acute gastrojejunal ulcer with haemorrhage                                                | 499719010        | 63954007 | 499719010       |
| Acute duodenal ulcer with haemorrhage AND perforation                                     | 507303017        | 86895006 | 507303017       |
| Gastric ulcer with haemorrhage but without obstruction                                    | 2764911000006118 | 16694003 | 477900010       |
| Acute duodenal ulcer with haemorrhage AND with perforation but without obstruction        | 3340391000006116 | 51847008 | 496129014       |
| Chronic gastrojejunal ulcer with haemorrhage                                              | 499386010        | 62838000 | 499386010       |
| Chronic duodenal ulcer with haemorrhage                                                   | 508524014        | 89469000 | 508524014       |
| Bleeding acute gastric ulcer                                                              | 1235493010       | 89748001 | 1235493010      |
| Acute peptic ulcer with haemorrhage AND obstruction                                       | 3199301000006115 | 43406003 | 493597015       |
| Chronic gastrojejunal ulcer with haemorrhage but without perforation                      | 3463961000006119 | 59356009 | 498412010       |
| Gastrojejunal ulcer with hemorrhage                                                       | 3868441000006114 | 84124004 | 139505014       |
| Unspec gastrojejunal ulcer with haemorrhage and perforation                               | 81321000006111   | 16121001 | 27283019        |
| Chronic peptic ulcer with haemorrhage AND obstruction                                     | 3417371000006118 | 56461008 | 497616018       |
| GU - acute + haemorrhage                                                                  | 885771000006112  | 89748001 | 885771000006112 |
| DU - acute + h'ge + perf.                                                                 | 885871000006115  | 86895006 | 885871000006115 |
| Acute gastric ulcer with perforation                                                      | 33419017         | 19850005 | 33419017        |
| Chronic gastrojejunal ulcer with haemorrhage AND with perforation but without obstruction | 3251341000006113 | 46523000 | 494529015       |
| Acute duodenal ulcer with perforation                                                     | 101926016        | 61347001 | 101926016       |
| Acute gastrojejunal ulcer with perforation                                                | 110704012        | 66636001 | 110704012       |
| Gastrojejunal ulcer with hemorrhage, with perforation AND with obstruction                | 3389341000006114 | 54798007 | 91074015        |

**Table S18. Brain injury Aurum codes**

| Term                                                                                                                      | MedCode ID       | SNOMED CT Concept ID | SNOMED CT Description ID |
|---------------------------------------------------------------------------------------------------------------------------|------------------|----------------------|--------------------------|
| Traumatic subdural hemorrhage confined to region of tentorium                                                             | 7834491000006110 | 722628000            | 3325389012               |
| Open skull fracture with intracranial injury                                                                              | 4198071000006115 | 111617009            | 178860014                |
| Subdural hemorrhage following injury without open intracranial wound AND with moderate loss of consciousness (1-24 hours) | 3529801000006110 | 63323000             | 105259018                |
| Brain injury without open intracranial wound AND with moderate loss of consciousness (1-24 hours)                         | 3267211000006116 | 47450003             | 79110011                 |
| Subarachnoid haemorrhage following injury without open intracranial wound                                                 | 2950231000006111 | 28048009             | 2950231000006111         |
| Oth cerebral laceration/contusion no open intracranial wound                                                              | 39851000006115   | 269144002            | 402921014                |
| Cerebellar contusion with open intracranial wound AND loss of consciousness                                               | 2805231000006116 | 19233004             | 32422011                 |
| Intracranial injury with prolonged coma without open wound                                                                | 455459010        | 311827003            | 455459010                |
| Brain stem contusion with open intracranial wound AND moderate loss of consciousness (1-24 hours)                         | 2867121000006117 | 23026001             | 38683019                 |
| Subarachnoid hemorrhage following injury with open intracranial wound                                                     | 2583451000006111 | 5251007              | 9804011                  |
| Intracranial hematoma following injury                                                                                    | 3111241000006113 | 37955001             | 63313013                 |
| Traumatic extradural hematoma with open intracranial wound                                                                | 6053351000006112 | 315049003            | 459517019                |
| Non-traumatic intracranial subdural haemorrhage                                                                           | 4777951000006113 | 195176009            | 2913186018               |
| Traumatic cranial subdural hematoma                                                                                       | 5459251000006112 | 262952002            | 391039018                |
| Open traumatic subdural hemorrhage                                                                                        | 4854201000006110 | 209956005            | 320770015                |
| Other cerebral h'ge after injury + open intracranial wound                                                                | 35791000006117   | 450418003            | 2915288012               |
| Other cerebral h'ge after injury no open intracranial wound                                                               | 35801000006116   | 450418003            | 2915288012               |
| Oth cereb h'ge inj + open intracran wnd+LOC unspec duration                                                               | 39721000006117   | 450418003            | 2915288012               |
| Oth cereb h'ge inj no open intracran wnd+concussion unspec                                                                | 39751000006114   | 450418003            | 2915288012               |
| Subarach h'ge inj no open intracran wnd + concussion unspec                                                               | 123311000006115  | 28048009             | 46957015                 |
| Subarachnoid h'ge inj + open intracran wnd+concussion unspec                                                              | 123351000006119  | 5251007              | 9804011                  |
| Subarachnoid h'ge inj no open intracran wnd+<1hr loss consc                                                               | 123391000006113  | 28048009             | 46957015                 |
| Subarachnoid h'ge inj no open intracran wound + 1-24hr LOC                                                                | 123421000006117  | 28048009             | 46957015                 |
| Subdural h'ge inj + open intracranial wound + unspec consc                                                                | 124091000006112  | 209956005            | 320770015                |
| Extradural h'ge inj + open intracran wnd+LOC unspec duration                                                              | 659991000006112  | 65189006             | 108332012                |
| Extradural h'ge inj + open intracranial wnd + unspec consc                                                                | 660001000006119  | 65189006             | 108332012                |
| Extradural h'ge inj no open intracra wnd+LOC unspec duration                                                              | 660031000006110  | 262949005            | 391026017                |
| Extradural h'ge inj no open intracran wnd+1-24hr loss consc                                                               | 660061000006118  | 43216008             | 72101019                 |
| Extradural h'ge inj no open intracranial wnd + no loss consc                                                              | 660081000006111  | 43216008             | 72101019                 |
| Extradural h'ge inj no open intracranial wnd + unspec consc                                                               | 660091000006114  | 262949005            | 391026017                |

|                                                                                                                                     |                   |           |                 |
|-------------------------------------------------------------------------------------------------------------------------------------|-------------------|-----------|-----------------|
| Extradural h'ge inj no open intracranial wnd+<1hr loss consc                                                                        | 660101000006115   | 43216008  | 72101019        |
| [V]Personal history of malignant neoplasm of brain                                                                                  | 1227581011        | 266987004 | 397818015       |
| Nontraumatic subarachnoid intracranial hemorrhage                                                                                   | 5518101000006114  | 270907008 | 3449601019      |
| Intracranial hemorrhage following injury without open intracranial wound                                                            | 4198351000006110  | 111668007 | 178881014       |
| Intracranial haemorrhage following injury without open intracranial wound AND with brief loss of consciousness (less than one hour) | 2780311000006112  | 17667005  | 478394019       |
| Biopsy of lesion of brain stem NEC                                                                                                  | 512541000006116   | 230842002 | 345857013       |
| Brain cont + open intracranial wound + concussion unspec                                                                            | 524321000006119   | 269144002 | 402921014       |
| Brain cont + open intracranial wound + unspec state consc                                                                           | 524351000006111   | 269144002 | 402921014       |
| Closed #skull bse + intracranial injury + concussion unspec                                                                         | 559971000006115   | 111603000 | 178853015       |
| Closed #skull bse + intracranial injury, LOC unspec duration                                                                        | 560011000006110   | 111603000 | 178853015       |
| Closed #skull bse no intracranial inj,>24hr LOC not restored                                                                        | 560041000006114   | 27644009  | 46274013        |
| Closed #skull bse no intracranial injury + concussion unspec                                                                        | 560051000006111   | 27644009  | 46274013        |
| Closed #skull NOS + intracranial inj, <1hr loss of consc                                                                            | 560121000006118   | 371162008 | 1209864014      |
| Closed #skull NOS + intracranial inj, >24hr LOC not restored                                                                        | 560131000006115   | 371162008 | 1209864014      |
| Closed #skull NOS + intracranial inj, >24hrs LOC + recovery                                                                         | 560141000006113   | 371162008 | 1209864014      |
| Closed #skull NOS no intracranial inj, >24hrs LOC + recovery                                                                        | 560211000006115   | 371162008 | 1209864014      |
| Closed #skull NOS no intracranial inj, LOC unspec duration                                                                          | 560231000006114   | 371162008 | 1209864014      |
| Closed #skull vlt + intracranial injury, LOC unspec duration                                                                        | 560311000006112   | 207687004 | 318117015       |
| Closed #skull vlt + intracranial injury, unspec state consc                                                                         | 560331000006118   | 207687004 | 318117015       |
| Closed #skull/face, mult + intracranial inj, no loss consc                                                                          | 560451000006118   | 5468008   | 10127011        |
| Closed #skull/face,mult + intracran inj, concussion unspec                                                                          | 560541000006119   | 5468008   | 10127011        |
| Cortex lacn + open intracranial wound + concussion unspec                                                                           | 597901000006114   | 59748008  | 99251014        |
| Cortex lacn + open intracranial wound + unspec state consc                                                                          | 597921000006116   | 59748008  | 99251014        |
| Crushing injury of head, part unspecified                                                                                           | 602701000006116   | 283851005 | 422396012       |
| Non-traumatic intracranial subdural hemorrhage                                                                                      | 4777941000006111  | 195176009 | 2913068019      |
| Brain damage - traumatic                                                                                                            | 12483101000006111 | 127295002 | 524451000006116 |
| Subdural h'ge after injury                                                                                                          | 991811000006115   | 209987007 | 991811000006115 |
| Closed traumatic subdural haemorrhage                                                                                               | 320752018         | 209947002 | 320752018       |
| Open traumatic subdural haemorrhage                                                                                                 | 320771016         | 209956005 | 320771016       |
| Traumatic subdural haemorrhage                                                                                                      | 320835014         | 209987007 | 320835014       |
| Subdural haemorrhage following injury                                                                                               | 320836010         | 209987007 | 320836010       |
| Traumatic subdural haematoma without open intracranial wound                                                                        | 459511018         | 315046005 | 459511018       |
| Traumatic extradural haematoma with open intracranial wound                                                                         | 459518012         | 315049003 | 459518012       |
| Subdural h'ge inj no open intracran wnd+>24hr LOC -restored                                                                         | 124121000006111   | 209947002 | 320752018       |

|                                                                                                                                                                          |                  |                 |                  |
|--------------------------------------------------------------------------------------------------------------------------------------------------------------------------|------------------|-----------------|------------------|
| Subdural h'ge inj no open intracran wnd+1-24hr loss consc                                                                                                                | 124131000006114  | 209947002       | 320752018        |
| Subdural h'ge inj no open intracranial wound+no loss consc                                                                                                               | 124191000006113  | 209947002       | 320752018        |
| Subdural or cerebral haemorrhage due to birth trauma OS                                                                                                                  | 124261000006112  | 240312009       | 359984010        |
| Open traumatic subdural intracranial haemorrhage                                                                                                                         | 4854211000006113 | 209956005       | 2912603017       |
| Traumatic intracerebral haemorrhage                                                                                                                                      | 7378421000006118 | 450418003       | 2915664016       |
| Contusion of cerebral cortex with open intracranial wound                                                                                                                | 3928361000006118 | 87888006        | 145701014        |
| Extradural haemorrhage following injury with open intracranial wound AND prolonged loss of consciousness (more than 24 hours) AND return to pre-existing conscious level | 3825541000006114 | 81520002        | 3825541000006114 |
| Traumatic brain injury with no loss of consciousness                                                                                                                     | 4396321000006112 | 127302008       | 590014           |
| Epidural haematoma following injury                                                                                                                                      | 647051000006114  | 262949005       | 391028016        |
| Evacuation of extradural haematoma                                                                                                                                       | 649541000006113  | 171713001       | 265968017        |
| Clipping of aneurysm of cerebral artery                                                                                                                                  | 506344012        | 85028008        | 506344012        |
| Open #skull/face, mult + intracranial inj, unspec consc                                                                                                                  | 263941000006114  | 5468008         | 10127011         |
| Open #skull bse + intracranial injury, unspec state of consc                                                                                                             | 264171000006119  | 111607004       | 178855010        |
| Open #skull NOS + intracranial inj, <1hr loss of consc                                                                                                                   | 264271000006114  | 371161001       | 1209863015       |
| Open #skull NOS + intracranial inj, >24hrs LOC not restored                                                                                                              | 264281000006112  | 371161001       | 1209863015       |
| Traumatic cerebral edema with open intracranial wound                                                                                                                    | 6009911000006116 | 311826007       | 455457012        |
| Traumatic extradural hematoma without open intracranial wound                                                                                                            | 6053331000006117 | 315048006       | 459516011        |
| Brain stem laceration without open intracranial wound AND with concussion                                                                                                | 2782671000006110 | 17819003        | 30102010         |
| Traumatic brain injury with moderate loss of consciousness                                                                                                               | 4396301000006119 | 127300000       | 588013           |
| Subdural haemorrhage following injury without open intracranial wound                                                                                                    | 4854181000006114 | 209947002       | 2915859018       |
| Traumatic intracranial extradural hematoma                                                                                                                               | 5459191000006110 | 262949005       | 2915790014       |
| Cerebral haemorrhage following injury NOS                                                                                                                                | 320852013        | 450418003       | 2916363013       |
| Other cerebral haemorrhage following injury                                                                                                                              | 320853015        | 450418003       | 2916363013       |
| Brain stem laceration without open intracranial wound AND with prolonged loss of consciousness (more than 24 hours) AND return to pre-existing conscious level           | 3649561000006119 | 70686002        | 117408014        |
| Middle meningeal haemorrhage following injury                                                                                                                            | 702641000006119  | 30400005        | 484576014        |
| Intracran inj NOS no open intracran wnd+>24hr LOC -restored                                                                                                              | 746611000006114  | 127296001       | 584010           |
| Intracranial inj NOS + open intracran wnd+>24hr LOC+recovery                                                                                                             | 769311000006117  | 127296001       | 584010           |
| Intracranial inj NOS + open intracran wnd+concussion unspec                                                                                                              | 769321000006113  | 127296001       | 584010           |
| Intracranial inj NOS + open intracranial wnd+<1hr loss consc                                                                                                             | 769351000006116  | 127296001       | 584010           |
| Intracranial inj NOS + open intracranial wound+no loss consc                                                                                                             | 769361000006119  | 127296001       | 584010           |
| Extradural hemorrhage following injury with open intracranial wound, with no loss of consciousness                                                                       | 4854301000006119 | 209978003       | 320818010        |
| Intracerebral injury NOS                                                                                                                                                 | 990131000006113  | 566951000000103 | 990131000006113  |



|                                                                                                                                                                         |                   |           |                  |
|-------------------------------------------------------------------------------------------------------------------------------------------------------------------------|-------------------|-----------|------------------|
| Traumatic intracranial haemorrhage                                                                                                                                      | 12757921000006111 | 82894007  | 505323015        |
| Cerebral haemorrhage following injury                                                                                                                                   | 12757911000006115 | 82894007  | 505322013        |
| Subarachnoid hemorrhage following injury without open intracranial wound                                                                                                | 11923791000006114 | 28048009  | 46957015         |
| Craniectomy with treatment of penetrating wound of brain                                                                                                                | 2546441000006111  | 2968008   | 6037013          |
| Subarachnoid hemorrhage following injury without open intracranial wound AND with concussion                                                                            | 2567831000006110  | 4332009   | 8298019          |
| Traumatic extradural haematoma                                                                                                                                          | 391028016         | 262949005 | 391028016        |
| Traumatic cranial subarachnoid hemorrhage                                                                                                                               | 5459281000006116  | 262955000 | 391046010        |
| Closed skull fracture with intracranial injury                                                                                                                          | 4198041000006111  | 111613008 | 4198041000006111 |
| Subarachnoid hemorrhage following injury with open intracranial wound AND concussion                                                                                    | 3284991000006114  | 48518008  | 80833014         |
| Traumatic intracranial subdural haematoma with brief loss of consciousness                                                                                              | 6348441000006113  | 371050006 | 1207227019       |
| Extradural hemorrhage following injury with open intracranial wound AND prolonged loss of consciousness (more than 24 hours) AND return to pre-existing conscious level | 11924651000006110 | 81520002  | 135232013        |
| Ligation of aneurysm of cerebral artery NEC                                                                                                                             | 271559016         | 230899005 | 345929019        |
| Subarachnoid haemorrhage following injury without open intracranial wound AND with no loss of consciousness                                                             | 3074431000006116  | 35672006  | 486236019        |
| Intracranial hemorrhage following injury                                                                                                                                | 12757871000006118 | 82894007  | 137497019        |
| Lacerating brain injury                                                                                                                                                 | 3783541000006116  | 78914008  | 503949015        |
| Traumatic subdural haematoma                                                                                                                                            | 5459261000006114  | 262952002 | 2913152010       |
| Cerebellar contusion without open intracranial wound                                                                                                                    | 3438141000006115  | 57739006  | 96013015         |
| Intracranial hemorrhage following injury without intracranial wound AND with moderate loss of consciousness (1-24 hours)                                                | 3589031000006116  | 66976009  | 111248010        |
| Intracranial haemorrhage following injury with loss of consciousness                                                                                                    | 4396431000006115  | 127308007 | 474109017        |
| Brain stem contusion without open intracranial wound AND with concussion                                                                                                | 3788431000006116  | 79220008  | 131450012        |
| Subdural haemorrhage following injury without open intracranial wound AND with moderate loss of consciousness (1-24 hours)                                              | 3529791000006114  | 63323000  | 499552019        |
| Non-traumatic subdural hemorrhage                                                                                                                                       | 4777931000006118  | 195176009 | 2469434017       |
| Nontraumatic intracranial haemorrhage                                                                                                                                   | 3533578018        | 738779002 | 3533578018       |
| Hind brain contusion with open intracranial wound, with more than 24 hours loss of consciousness without return to pre-existing conscious level                         | 823341000006110   | 209887008 | 320658014        |
| Hind brain contusion with open intracranial wound, with 1-24 hours loss of consciousness                                                                                | 823351000006112   | 209885000 | 320656013        |
| Hind brain contusion with open intracranial wound, with more than 24 hours loss of consciousness and return to pre-existing conscious level                             | 823381000006116   | 209886004 | 320657016        |
| Chronic non-traumatic intracranial subdural haemorrhage                                                                                                                 | 7497191000006114  | 609382000 | 2959633012       |
| Subarachnoid hemorrhage following injury with open intracranial wound AND moderate loss of consciousness (1-24 hours)                                                   | 11903611000006117 | 87253004  | 144684019        |
| Extradural hemorrhage following injury without open intracranial wound AND with concussion                                                                              | 3760981000006114  | 77498000  | 128652013        |
| Brain stem laceration without open intracranial wound AND with brief loss of consciousness (less than one hour)                                                         | 3467421000006112  | 59561005  | 98926012         |

|                                                                                                                                                                             |                  |                 |            |
|-----------------------------------------------------------------------------------------------------------------------------------------------------------------------------|------------------|-----------------|------------|
| Traumatic brain injury with prolonged loss of consciousness                                                                                                                 | 4396311000006116 | 127301001       | 589017     |
| Nontraumatic hemorrhage of subarachnoid space from intracranial artery                                                                                                      | 3511284017       | 291371000119100 | 3511284017 |
| Brain injury with open intracranial wound AND brief loss of consciousness (less than one hour)                                                                              | 2951821000006119 | 28156009        | 47135017   |
| Intracranial haemorrhage following injury                                                                                                                                   | 7378271000006116 | 450410005       | 2915426010 |
| Nontraumatic extradural intracranial hemorrhage                                                                                                                             | 6593141000006116 | 397809001       | 2915638010 |
| Extradural hemorrhage following injury with open intracranial wound AND moderate loss of consciousness (1-24 hours)                                                         | 3468981000006117 | 59648004        | 99099016   |
| Intracranial hemorrhage following injury with intracranial wound AND moderate loss of consciousness (1-24 hours)                                                            | 3055551000006113 | 34501004        | 57585011   |
| Non-traumatic extradural intracranial hematoma                                                                                                                              | 5656951000006110 | 281865000       | 419997012  |
| Cerebellar laceration with open intracranial wound AND prolonged loss of consciousness (more than 24 hours) AND return to pre-existing conscious level                      | 3366571000006117 | 53429002        | 88842018   |
| Traumatic haemorrhage of subdural space of infratentorial region                                                                                                            | 7834471000006114 | 722628000       | 3325385018 |
| Traumatic cerebral oedema without open intracranial wound                                                                                                                   | 455455016        | 311825006       | 455455016  |
| Excision of aneurysm of cerebral artery                                                                                                                                     | 271556011        | 175385008       | 271556011  |
| Intracranial haemorrhage following injury with open intracranial wound AND concussion                                                                                       | 3782881000006115 | 78879009        | 503942012  |
| Craniotomy and evacuation of traumatic haematoma                                                                                                                            | 7330521000006119 | 446816008       | 2883668012 |
| Intracranial hemorrhage following injury without open intracranial wound AND with prolonged loss of consciousness (more than 24 hours) without return to pre-existing level | 2521231000006111 | 1430001         | 3487015    |
| Brain stem laceration with open intracranial wound AND moderate loss of consciousness (1-24 hours)                                                                          | 3160801000006118 | 41025001        | 68439012   |
| Brain stem laceration without open intracranial wound AND with no loss of consciousness                                                                                     | 3777371000006118 | 78525006        | 130297019  |
| Subarachnoid haemorrhage following injury without open intracranial wound AND with loss of consciousness                                                                    | 3629571000006112 | 69458009        | 501279013  |
| Multiple open fractures of skull AND/OR face with cerebral laceration AND/OR contusion                                                                                      | 3930061000006116 | 88008005        | 145885012  |
| Cerebellar contusion with open intracranial wound AND brief loss of consciousness (less than one hour)                                                                      | 3683771000006112 | 72797002        | 120920014  |
| Intracranial hemorrhage following injury with open intracranial wound and prolonged loss of consciousness (more than 24 hours) without return to pre-existing level         | 4198371000006117 | 111671004       | 135096017  |
| Cerebellar laceration with open intracranial wound                                                                                                                          | 2997431000006117 | 30858001        | 51649013   |
| Intracranial hemorrhage co-occurrent and due to complex wound of head                                                                                                       | 7840901000006116 | 723141009       | 3335258015 |
| Brain stem contusion without open intracranial wound AND with loss of consciousness                                                                                         | 2979771000006112 | 29807001        | 49879010   |
| Traumatic injury of blood vessel of head                                                                                                                                    | 7317871000006113 | 446029009       | 2883183018 |
| Extradural haemorrhage following injury without open intracranial wound AND with concussion                                                                                 | 3760971000006111 | 77498000        | 503596015  |
| Intracranial haemorrhage following injury without open intracranial wound                                                                                                   | 4198341000006113 | 111668007       | 189842012  |
| Secondary traumatic haemorrhage of brainstem                                                                                                                                | 7840851000006114 | 723139008       | 3334700013 |

|                                                                                                                                                                                   |                  |                 |            |
|-----------------------------------------------------------------------------------------------------------------------------------------------------------------------------------|------------------|-----------------|------------|
| Extradural haemorrhage following injury with open intracranial wound                                                                                                              | 320814012        | 65189006        | 500043017  |
| Subarachnoid haemorrhage following injury with open intracranial wound AND prolonged loss of consciousness (more than 24 hours) without return to pre-existing conscious level    | 123291000006119  | 69178005        | 501220014  |
| Subarachnoid haemorrhage following injury with open intracranial wound AND moderate loss of consciousness (1-24 hours)                                                            | 123341000006116  | 87253004        | 507490011  |
| Subdural haemorrhage following injury with open intracranial wound AND moderate loss of consciousness (1-24 hours)                                                                | 124071000006111  | 90165008        | 508869011  |
| Subdural haemorrhage following injury without open intracranial wound AND with loss of consciousness                                                                              | 3049841000006112 | 34135005        | 485760010  |
| Subdural haemorrhage following injury with open intracranial wound AND brief loss of consciousness (less than one hour)                                                           | 124101000006118  | 29635000        | 484345019  |
| Subdural haemorrhage following injury with open intracranial wound, with no loss of consciousness                                                                                 | 124111000006115  | 209958006       | 320775013  |
| Extradural haemorrhage following injury without open intracranial wound AND with no loss of consciousness                                                                         | 4198421000006112 | 111679002       | 364069017  |
| Brain stem laceration without open intracranial wound AND with moderate loss of consciousness (1-24 hours)                                                                        | 2794111000006117 | 18531006        | 31261015   |
| Nontraumatic subarachnoid haemorrhage with brain compression                                                                                                                      | 8044541000006113 | 141091000119105 | 3043206010 |
| Extradural haemorrhage following injury without open intracranial wound AND with prolonged loss of consciousness (more than 24 hours) AND return to pre-existing conscious level  | 3879081000006114 | 84792001        | 506232012  |
| Intracranial hemorrhage following injury with brief loss of consciousness                                                                                                         | 4396461000006112 | 127309004       | 597012     |
| Subdural hemorrhage following injury without open intracranial wound AND with prolonged loss of consciousness (more than 24 hours) AND return to pre-existing conscious level     | 3920061000006118 | 87345009        | 144822016  |
| Subacute non-traumatic intracranial subdural hemorrhage                                                                                                                           | 8089881000006112 | 291591000119107 | 2959779014 |
| Intracranial hemorrhage following injury without open intracranial wound AND with prolonged loss of consciousness (more than 24 hours) AND return to pre-existing conscious level | 3776601000006116 | 78477003        | 130220011  |
| Brain stem laceration with open intracranial wound AND prolonged loss of consciousness (more than 24 hours) without return to pre-existing conscious level                        | 3547841000006115 | 64413001        | 107072010  |
| Open fracture of base of skull with cerebral laceration AND contusion                                                                                                             | 2989141000006113 | 30371007        | 50833015   |
| Subarachnoid hemorrhage following injury without open intracranial wound AND with no loss of consciousness                                                                        | 3074441000006114 | 35672006        | 59500013   |
| Subarachnoid hemorrhage following injury without open intracranial wound AND with prolonged loss of consciousness (more than 24 hours) AND return to pre-existing conscious level | 3942121000006114 | 88747000        | 147146018  |
| Brain injury with open intracranial wound AND no loss of consciousness                                                                                                            | 2705081000006112 | 12912004        | 22137010   |
| Subarachnoid haemorrhage following injury without open intracranial wound AND with moderate loss of consciousness (1-24 hours)                                                    | 4198381000006119 | 111673001       | 364055017  |

|                                                                                                                                                                                    |                  |                 |                  |
|------------------------------------------------------------------------------------------------------------------------------------------------------------------------------------|------------------|-----------------|------------------|
| Cerebellar laceration without open intracranial wound                                                                                                                              | 2983451000006116 | 30031007        | 50251013         |
| Subdural haemorrhage following injury without open intracranial wound AND with no loss of consciousness                                                                            | 3145681000006112 | 40135004        | 492453011        |
| Extradural hemorrhage following injury with open intracranial wound AND loss of consciousness                                                                                      | 4198451000006115 | 111681000       | 189006017        |
| Traumatic intracranial subdural hematoma with brief loss of consciousness                                                                                                          | 6348451000006110 | 371050006       | 1208039019       |
| Cranial puncture                                                                                                                                                                   | 5559151000006110 | 273989008       | 409716019        |
| Compression of brain co-occurrent and due to nontraumatic subarachnoid haemorrhage                                                                                                 | 8044551000006110 | 141091000119105 | 3042983016       |
| Subdural hemorrhage following injury without open intracranial wound AND with brief loss of consciousness (less than one hour)                                                     | 2919471000006113 | 26205001        | 43899010         |
| Subarachnoid haemorrhage following injury without open intracranial wound AND with brief loss of consciousness (less than one hour)                                                | 3914851000006114 | 87020000        | 507372011        |
| Focal haemorrhagic contusion of cerebrum                                                                                                                                           | 7834261000006115 | 722615007       | 3332903015       |
| Subarachnoid haemorrhage following injury with open intracranial wound AND moderate loss of consciousness (1-24 hours)                                                             | 3918591000006111 | 87253004        | 3918591000006111 |
| Cerebellar laceration with open intracranial wound AND prolonged loss of consciousness (more than 24 hours) without return to pre-existing conscious level                         | 3546541000006115 | 64337000        | 106943019        |
| Subarachnoid haemorrhage following injury without open intracranial wound AND with prolonged loss of consciousness (more than 24 hours) AND return to pre-existing conscious level | 3942111000006118 | 88747000        | 508175017        |
| Injury of head with otorrhagia                                                                                                                                                     | 4063221000006112 | 95848000        | 158756016        |
| Open fracture of base of skull with intracranial injury, with less than 1 hour loss of consciousness                                                                               | 264121000006115  | 207746007       | 318190017        |
| Intracranial hemorrhage following injury with open intracranial wound AND brief loss of consciousness (less than one hour)                                                         | 2795161000006118 | 18605003        | 31370015         |
| Traumatic brain injury with prolonged loss of consciousness (more than 24 hours) and return to pre-existing conscious level                                                        | 7380341000006114 | 450551009       | 2916174013       |
| Subdural haemorrhage following injury without open intracranial wound AND with prolonged loss of consciousness (more than 24 hours) AND return to pre-existing conscious level     | 3920051000006115 | 87345009        | 507531010        |
| Compression of brain co-occurrent and due to nontraumatic subarachnoid hemorrhage                                                                                                  | 8044561000006112 | 141091000119105 | 3043035013       |
| Traumatic brain injury with loss of consciousness one hour or more                                                                                                                 | 7380591000006114 | 450569000       | 2915718018       |
| Intracranial hemorrhage following injury without open intracranial wound AND with brief loss of consciousness (less than one hour)                                                 | 2780321000006116 | 17667005        | 29855017         |
| Intracranial hemorrhage following injury with loss of consciousness                                                                                                                | 4396441000006113 | 127308007       | 596015           |
| Traumatic subdural hematoma without open intracranial wound                                                                                                                        | 6053291000006112 | 315046005       | 459512013        |
| Intracranial hemorrhage following injury with open intracranial wound                                                                                                              | 3765301000006113 | 77768006        | 129069015        |
| Subarachnoid hemorrhage following injury without open intracranial wound AND with brief loss of consciousness (less than one hour)                                                 | 3914861000006111 | 87020000        | 144313014        |
| Intracranial hemorrhage following injury without open intracranial wound AND with concussion                                                                                       | 3781111000006112 | 78757009        | 130692016        |

|                                                                                                                                                                                      |                   |                 |                 |
|--------------------------------------------------------------------------------------------------------------------------------------------------------------------------------------|-------------------|-----------------|-----------------|
| Brain injury with open intracranial wound                                                                                                                                            | 2952391000006117  | 28188001        | 47189015        |
| Cerebellar contusion with open intracranial wound AND concussion                                                                                                                     | 3900201000006118  | 86125000        | 142812014       |
| Traumatic brain injury with prolonged loss of consciousness (more than 24 hours) without return to pre-existing conscious level                                                      | 7380351000006111  | 450552002       | 2915596018      |
| Non-traumatic spinal subdural haematoma                                                                                                                                              | 6028571000006117  | 313304007       | 457177012       |
| Extradural hemorrhage following injury without open intracranial wound AND with brief loss of consciousness (less than one hour)                                                     | 3152821000006115  | 40549004        | 67610019        |
| Brain damage - traumatic                                                                                                                                                             | 11923371000006114 | 275272006       | 411234012       |
| Subdural hemorrhage following injury without open intracranial wound AND with concussion                                                                                             | 2606541000006112  | 6666006         | 12042015        |
| Head injury with hemorrhage from nose                                                                                                                                                | 4395861000006117  | 127276009       | 205229010       |
| Intracranial haemorrhage following injury with prolonged loss of consciousness without return to pre-existing conscious level                                                        | 4396511000006110  | 127312001       | 474113012       |
| Non-traumatic intracranial subdural hematoma                                                                                                                                         | 5656931000006115  | 281864001       | 419995016       |
| Focal traumatic haematoma of brainstem                                                                                                                                               | 7834421000006113  | 722624003       | 3334493017      |
| Nontraumatic subdural haematoma with brain compression                                                                                                                               | 8044591000006116  | 141151000119101 | 2967571019      |
| Subacute non-traumatic intracranial subdural haemorrhage                                                                                                                             | 8089861000006119  | 291591000119107 | 2959517016      |
| Subarachnoid haemorrhage following injury with open intracranial wound                                                                                                               | 320735017         | 5251007         | 496337012       |
| Traumatic subdural hematoma                                                                                                                                                          | 391035012         | 262952002       | 2912898019      |
| Lobotomy of brain                                                                                                                                                                    | 5559171000006117  | 273991000       | 409719014       |
| Intracranial haemorrhage following injury with open intracranial wound AND brief loss of consciousness (less than one hour)                                                          | 2795151000006115  | 18605003        | 478724012       |
| Brain stem laceration with open intracranial wound                                                                                                                                   | 2700331000006119  | 12589008        | 21640014        |
| Traumatic subdural intracranial haemorrhage                                                                                                                                          | 4854361000006118  | 209987007       | 2912530015      |
| Subarachnoid hemorrhage following injury with open intracranial wound AND brief loss of consciousness (less than one hour)                                                           | 3468691000006111  | 59633005        | 99064015        |
| Closed traumatic subdural hemorrhage                                                                                                                                                 | 4854141000006115  | 209947002       | 320753011       |
| Subdural haemorrhage following injury without open intracranial wound AND with concussion                                                                                            | 2606531000006119  | 6666006         | 500492017       |
| Extradural haemorrhage following injury without open intracranial wound AND with prolonged loss of consciousness (more than 24 hours) without return to pre-existing conscious level | 2768441000006115  | 16907002        | 477986019       |
| Acute nontraumatic subdural haemorrhage                                                                                                                                              | 3515795019        | 291581000119109 | 3515795019      |
| Intracran inj NOS + open intracran wnd+LOC unspec duration                                                                                                                           | 746601000006111   | 127296001       | 584010          |
| Intracranial inj NOS no open intracran wnd+<1hr loss consc                                                                                                                           | 768831000006114   | 127296001       | 584010          |
| Intracranial inj NOS no open intracran wnd+1-24hr loss consc                                                                                                                         | 768851000006119   | 127296001       | 584010          |
| Subdural hemorrhage following injury without open intracranial wound AND with loss of consciousness                                                                                  | 3049851000006114  | 34135005        | 57003014        |
| Closed fracture of skull NOS with intracranial injury                                                                                                                                | 12484051000006114 | 371162008       | 563781000006112 |
| Subdural hemorrhage following injury with open intracranial wound AND prolonged loss of consciousness (more than 24 hours) AND return to pre-existing conscious level                | 3357881000006110  | 52902005        | 88030010        |

|                                                                                                                                                                                           |                   |                 |            |
|-------------------------------------------------------------------------------------------------------------------------------------------------------------------------------------------|-------------------|-----------------|------------|
| Focal traumatic hematoma of brainstem                                                                                                                                                     | 7834431000006111  | 722624003       | 3332924013 |
| Nontraumatic subdural hematoma with brain compression                                                                                                                                     | 8044601000006112  | 141151000119101 | 2967694013 |
| Open fracture of vault of skull with intracranial injury, with 1-24 hours loss of consciousness                                                                                           | 52941000006118    | 207709008       | 318139018  |
| Cerebellar contusion without open intracranial wound AND with loss of consciousness                                                                                                       | 2772451000006114  | 17169009        | 29035017   |
| Cerebral hemorrhage following injury                                                                                                                                                      | 12757891000006117 | 82894007        | 505319011  |
| Traumatic intracranial hemorrhage                                                                                                                                                         | 12757901000006118 | 82894007        | 505320017  |
| Subdural hemorrhage following injury without open intracranial wound AND with no loss of consciousness                                                                                    | 3145691000006110  | 40135004        | 63714017   |
| Subarachnoid haemorrhage following injury with open intracranial wound AND loss of consciousness                                                                                          | 3727871000006112  | 75507000        | 503040018  |
| Subdural hemorrhage following injury with open intracranial wound AND concussion                                                                                                          | 3197131000006115  | 43262000        | 72179018   |
| Extradural hemorrhage following injury without open intracranial wound AND with prolonged loss of consciousness (more than 24 hours) AND return to pre-existing conscious level           | 3879091000006112  | 84792001        | 140578018  |
| Brain injury with open intracranial wound AND moderate loss of consciousness (1-24 hours)                                                                                                 | 3898191000006111  | 86010003        | 142597011  |
| Non-traumatic extradural intracranial haematoma                                                                                                                                           | 5656941000006113  | 281865000       | 419996015  |
| Traumatic haemorrhage of brainstem                                                                                                                                                        | 7834611000006115  | 722632006       | 3332940011 |
| Cerebellar contusion with open intracranial wound AND prolonged loss of consciousness (more than 24 hours) without return to pre-existing conscious level                                 | 2863721000006113  | 22825007        | 38315013   |
| Traumatic spinal subdural hematoma                                                                                                                                                        | 5456261000006117  | 262721007       | 390720010  |
| Cortex contusion with open intracranial wound                                                                                                                                             | 3928351000006115  | 87888006        | 145700010  |
| Traumatic cranial subdural haematoma                                                                                                                                                      | 5459221000006115  | 262952002       | 391036013  |
| Subarachnoid haemorrhage following injury with open intracranial wound AND brief loss of consciousness (less than one hour)                                                               | 123371000006112   | 59633005        | 498500014  |
| Subarachnoid haemorrhage following injury with open intracranial wound, with no loss of consciousness                                                                                     | 123381000006110   | 209940000       | 320739011  |
| Subdural haemorrhage following injury with open intracranial wound AND prolonged loss of consciousness (more than 24 hours) AND return to pre-existing conscious level                    | 124061000006116   | 52902005        | 496480019  |
| Brain stem contusion with open intracranial wound AND brief loss of consciousness (less than one hour)                                                                                    | 3426401000006114  | 57012007        | 94810019   |
| Subarachnoid hemorrhage following injury without open intracranial wound AND with prolonged loss of consciousness (more than 24 hours) AND without return to pre-existing conscious level | 2822141000006116  | 20276007        | 34108017   |
| Subdural hemorrhage following injury with open intracranial wound, with no loss of consciousness                                                                                          | 4854261000006111  | 209958006       | 320774012  |
| Cerebellar laceration with open intracranial wound AND loss of consciousness                                                                                                              | 3880781000006111  | 84900008        | 140766015  |
| Closed fracture of vault of skull with intracranial injury, with no loss of consciousness                                                                                                 | 560321000006116   | 207689001       | 318119017  |
| Brain stem contusion with open intracranial wound AND no loss of consciousness                                                                                                            | 3358011000006113  | 52913008        | 88047011   |

|                                                                                                                                                                                            |                   |                 |            |
|--------------------------------------------------------------------------------------------------------------------------------------------------------------------------------------------|-------------------|-----------------|------------|
| Extradural haemorrhage following injury without open intracranial wound AND with loss of consciousness                                                                                     | 3965881000006116  | 90178008        | 508877010  |
| Oth cereb h'ge inj no open intracran wnd+LOC unspec duration                                                                                                                               | 39761000006111    | 450418003       | 2915288012 |
| Subarachnoid h'ge inj no open intracran wnd+no loss consc                                                                                                                                  | 123411000006113   | 28048009        | 46957015   |
| Traumatic hemorrhage of brainstem                                                                                                                                                          | 7834621000006111  | 722632006       | 3332939014 |
| Subarachnoid haemorrhage following injury without open intracranial wound AND with prolonged loss of consciousness (more than 24 hours) AND without return to pre-existing conscious level | 2822131000006114  | 20276007        | 480562018  |
| Intracranial hemorrhage following injury without open intracranial wound AND with loss of consciousness                                                                                    | 2793491000006117  | 18485009        | 31186017   |
| Cerebellar laceration with open intracranial wound AND no loss of consciousness                                                                                                            | 2728701000006119  | 14434006        | 24535010   |
| Multiple traumatic hemorrhages of brain tissue                                                                                                                                             | 7834661000006117  | 722633001       | 3332944019 |
| Intracranial hemorrhage following injury with open intracranial wound AND loss of consciousness                                                                                            | 2710751000006112  | 13289004        | 22738011   |
| Open fracture of base of skull with intracranial injury                                                                                                                                    | 259601000006113   | 111607004       | 178855010  |
| Open fracture of vault of skull with intracranial injury, with less than 1 hour loss of consciousness                                                                                      | 264431000006110   | 207708000       | 318138014  |
| Open fracture of base of skull with intracranial injury, with more than 24 hours loss of consciousness without return to pre-existing conscious level                                      | 265451000006116   | 207749000       | 318193015  |
| Head injury with haemorrhage from ear                                                                                                                                                      | 4063241000006117  | 95848000        | 512328010  |
| Intracranial hemorrhage following injury with prolonged loss of consciousness AND return to pre-existing conscious level                                                                   | 4396501000006112  | 127311008       | 599010     |
| Brain stem laceration without open intracranial wound                                                                                                                                      | 2832491000006115  | 20899000        | 35146017   |
| Extradural haemorrhage following injury without open intracranial wound AND with brief loss of consciousness (less than one hour)                                                          | 3152811000006111  | 40549004        | 492668015  |
| Brain injury with open intracranial wound AND prolonged loss of consciousness (more than 24 hours) AND return to pre-existing conscious level                                              | 2948171000006119  | 27923006        | 46743012   |
| Closed fracture of base of skull with cerebral laceration AND/OR contusion                                                                                                                 | 3988021000006116  | 91589002        | 151735014  |
| Nontraumatic haemorrhage of subarachnoid space from intracranial artery                                                                                                                    | 3511285016        | 291371000119100 | 3511285016 |
| Intracranial haemorrhage following injury with open intracranial wound AND no loss of consciousness                                                                                        | 2624481000006115  | 7819003         | 503779018  |
| Cerebellar laceration without open intracranial wound AND with prolonged loss of consciousness (more than 24 hours) AND return to pre-existing conscious level                             | 3981471000006117  | 91168001        | 151064013  |
| Subdural hemorrhage following injury with open intracranial wound AND loss of consciousness                                                                                                | 3237321000006110  | 45659008        | 76138016   |
| Traumatic cerebral hemorrhage                                                                                                                                                              | 7378441000006113  | 450418003       | 2916150010 |
| Subarachnoid hemorrhage following injury with open intracranial wound AND prolonged loss of consciousness (more than 24 hours) without return to pre-existing conscious level              | 11903601000006115 | 69178005        | 114903015  |
| Traumatic intracerebral haemorrhage                                                                                                                                                        | 12757941000006116 | 82894007        | 2475153011 |

|                                                                                                                                                                                     |                  |                 |            |
|-------------------------------------------------------------------------------------------------------------------------------------------------------------------------------------|------------------|-----------------|------------|
| Subarachnoid hemorrhage following injury with open intracranial wound, with no loss of consciousness                                                                                | 4854121000006110 | 209940000       | 320738015  |
| Intracranial nontraumatic haemorrhage of foetus and newborn                                                                                                                         | 394431000006118  | 206417009       | 2791314016 |
| Brain contusion with open intracranial wound, with more than 1 hour loss of consciousness                                                                                           | 524291000006111  | 209921006       | 320693019  |
| Brain contusion with open intracranial wound, with 1-24 hours loss of consciousness                                                                                                 | 524311000006110  | 209922004       | 320694013  |
| Brain contusion with open intracranial wound, with no loss of consciousness                                                                                                         | 524341000006114  | 209920007       | 320692012  |
| Biopsy of lesion of cranial nerve                                                                                                                                                   | 512591000006113  | 171687004       | 265940016  |
| Brain cont + open intracranial wound + LOC unspec duration                                                                                                                          | 524331000006116  | 269144002       | 402921014  |
| Closed #skull bse no intracranial injury, <1hr loss of consc                                                                                                                        | 560061000006113  | 27644009        | 46274013   |
| Closed #skull vlt with intracranial injury+concussion unspec                                                                                                                        | 560421000006110  | 207687004       | 318117015  |
| Cortex cont + open intracranial wnd + LOC unspec duration                                                                                                                           | 597681000006113  | 209843004       | 320611018  |
| Cortex cont + open intracranial wound + unspec state consc                                                                                                                          | 597731000006115  | 87888006        | 145700010  |
| Cortex lacn + open intracranial wnd + LOC unspec duration                                                                                                                           | 597861000006119  | 59748008        | 99251014   |
| Cortex lacn no open intracranial wnd + LOC unspec duration                                                                                                                          | 597951000006113  | 78914008        | 130942015  |
| Late effect of injury to blood vessel of head, neck and extremities                                                                                                                 | 750631000006119  | 210950000       | 322021015  |
| Injuries of brain and cranial nerves with injuries of nerves and spinal cord at neck level                                                                                          | 777751000006119  | 213383004       | 325280017  |
| Intracranial haemorrhage following injury with brief loss of consciousness                                                                                                          | 4396451000006110 | 127309004       | 474110010  |
| Intracranial hemorrhage following injury with open intracranial wound AND concussion                                                                                                | 3782891000006117 | 78879009        | 130868014  |
| Traction injury of cranial nerve                                                                                                                                                    | 5459341000006115 | 262960001       | 391054012  |
| Extradural hemorrhage following injury without open intracranial wound AND with prolonged loss of consciousness (more than 24 hours) without return to pre-existing conscious level | 2768451000006118 | 16907002        | 28621013   |
| Nontraumatic subarachnoid hemorrhage with brain compression                                                                                                                         | 8044571000006117 | 141091000119105 | 3043074018 |
| Closed skull fracture with cerebral laceration AND/OR contusion                                                                                                                     | 3940751000006119 | 88651008        | 146986016  |
| Cerebellar laceration without open intracranial wound AND with no loss of consciousness                                                                                             | 3887091000006113 | 85314006        | 141420019  |
| Craniotomy and removal of hematoma from extradural space                                                                                                                            | 7312961000006111 | 445746008       | 2884424011 |
| Closed fracture of vault of skull with intracranial injury, with less than 1 hour loss of consciousness                                                                             | 560281000006110  | 207690005       | 318120011  |
| Cortex contusion with open intracranial wound, with more than 24 hours loss of consciousness and return to pre-existing conscious level                                             | 597661000006115  | 209849000       | 320617019  |
| Cortex laceration with open intracranial wound, with more than 24 hours loss of consciousness and return to pre-existing conscious level                                            | 597881000006112  | 209867007       | 320635011  |
| Cortex laceration with open intracranial wound, with 1-24 hours loss of consciousness                                                                                               | 597891000006110  | 209866003       | 320634010  |
| Cortex laceration with open intracranial wound, with no loss of consciousness                                                                                                       | 597911000006112  | 209864000       | 320632014  |
| Nontraumatic extradural haemorrhage                                                                                                                                                 | 660111000006117  | 397809001       | 1773153015 |
| Intracranial haemorrhage following injury without open intracranial wound AND with prolonged loss                                                                                   | 2521221000006113 | 1430001         | 476216010  |



|                                                                                                                                                                                    |                   |           |            |
|------------------------------------------------------------------------------------------------------------------------------------------------------------------------------------|-------------------|-----------|------------|
| of consciousness (more than 24 hours) without return to pre-existing level                                                                                                         |                   |           |            |
| Traumatic spinal extradural haematoma                                                                                                                                              | 5456211000006115  | 262720008 | 390718012  |
| Open #skull vlt with intracranial injury + concussion unspec                                                                                                                       | 263881000006110   | 207705002 | 318135012  |
| Intracranial hemorrhage following injury with moderate loss of consciousness                                                                                                       | 4396481000006119  | 127310009 | 598019     |
| Traumatic hemorrhage of subdural space of infratentorial region                                                                                                                    | 7834481000006112  | 722628000 | 3325383013 |
| Intracranial haemorrhage co-occurrent and due to complex wound of head                                                                                                             | 7840891000006115  | 723141009 | 3335259011 |
| Traumatic spinal subdural haematoma                                                                                                                                                | 5456251000006119  | 262721007 | 390721014  |
| Brain stem laceration with open intracranial wound AND concussion                                                                                                                  | 3164101000006115  | 41222005  | 68763015   |
| Cerebellar laceration without open intracranial wound AND with brief loss of consciousness (less than one hour)                                                                    | 3059661000006113  | 34751006  | 58002019   |
| Extradural hemorrhage following injury without open intracranial wound AND with moderate loss of consciousness (1-24 hours)                                                        | 3523681000006119  | 62973004  | 104678015  |
| Subdural haemorrhage following injury without open intracranial wound AND with prolonged loss of consciousness (more than 24 hours) without return to pre-existing conscious level | 3652481000006119  | 70861009  | 501707010  |
| Primary traumatic haemorrhage of brainstem                                                                                                                                         | 7840831000006119  | 723138000 | 3334697014 |
| Oth cerebral h'ge inj + open intracranial wnd+no loss consc                                                                                                                        | 39801000006119    | 450418003 | 2915288012 |
| Subarach h'ge inj no open intracran wnd+>24hrs LOC-restored                                                                                                                        | 123321000006111   | 28048009  | 46957015   |
| Subarachnoid h'ge inj + open intracran wound + unspec consc                                                                                                                        | 123361000006117   | 5251007   | 9804011    |
| Extradural h'ge inj no open intracran wnd+>24hr LOC+recovery                                                                                                                       | 660041000006117   | 43216008  | 72101019   |
| Subdural haemorrhage - nontraumatic                                                                                                                                                | 300294013         | 195176009 | 300294013  |
| Traumatic intracerebral hemorrhage                                                                                                                                                 | 12757951000006119 | 82894007  | 2475363012 |
| Traumatic intracranial subdural haematoma                                                                                                                                          | 5459231000006117  | 262952002 | 391037016  |
| Extradural hemorrhage following injury without open intracranial wound AND with no loss of consciousness                                                                           | 4198431000006110  | 111679002 | 199709019  |
| Cerebellar laceration without open intracranial wound AND with loss of consciousness                                                                                               | 3969771000006113  | 90429009  | 149873010  |
| Subarachnoid h'ge inj no open intracran wound + unspec consc                                                                                                                       | 123431000006119   | 28048009  | 46957015   |
| Open fracture of base of skull with intracranial injury, with more than 24 hours loss of consciousness and return to pre-existing conscious level                                  | 264131000006117   | 207748008 | 318192013  |
| Subdural haemorrhage following injury without open intracranial wound AND with brief loss of consciousness (less than one hour)                                                    | 2919461000006118  | 26205001  | 483148019  |
| Open #skull/face, mult + intracran inj + concussion, unspec                                                                                                                        | 263891000006113   | 5468008   | 10127011   |
| Open #skull NOS + intracranial inj, LOC unspec duration                                                                                                                            | 264301000006111   | 371161001 | 1209863015 |
| Traumatic injury of third cranial nerve                                                                                                                                            | 3370341000006114  | 53675004  | 198460011  |
| Closed #skull bse no intracranial injury, 1-24hr loss consc                                                                                                                        | 560081000006115   | 27644009  | 46274013   |
| Closed #skull NOS + intracranial inj, 1-24hrs loss of consc                                                                                                                        | 560151000006110   | 371162008 | 1209864014 |

|                                                                                                                                                                              |                   |                 |            |
|------------------------------------------------------------------------------------------------------------------------------------------------------------------------------|-------------------|-----------------|------------|
| Closed #skull NOS no intracranial inj, <1hr loss of consc                                                                                                                    | 560201000006118   | 371162008       | 1209864014 |
| Closed #skull NOS no intracranial inj, unspec state of consc                                                                                                                 | 560251000006119   | 371162008       | 1209864014 |
| Closed #skull/face,mult + intracran inj, LOC unspec duration                                                                                                                 | 560551000006117   | 5468008         | 10127011   |
| Cortex lacn no open intracranial wnd + 1-24hr loss of consc                                                                                                                  | 597941000006111   | 78914008        | 130942015  |
| Mult #skull/face+other bones, closed + intracranial injury                                                                                                                   | 696141000006119   | 5468008         | 10127011   |
| Hind brain cont + open intracranial wnd +LOC unspec duration                                                                                                                 | 823391000006118   | 209881009       | 320652010  |
| Subdural haemorrhage following injury with open intracranial wound AND concussion                                                                                            | 3197121000006118  | 43262000        | 493561012  |
| Closed fracture of base of skull with intracranial injury, with less than 1 hour loss of consciousness                                                                       | 559981000006117   | 207728001       | 318172018  |
| Closed fracture of vault of skull with intracranial injury, with more than 24 hours loss of consciousness without return to pre-existing conscious level                     | 560271000006112   | 207693007       | 318123013  |
| Cortex laceration with open intracranial wound, with less than 1 hour loss of consciousness                                                                                  | 597871000006114   | 209865004       | 320633016  |
| Intracranial haemorrhage following injury                                                                                                                                    | 12716261000006116 | 82894007        | 505321018  |
| Nontraumatic extradural intracranial haemorrhage                                                                                                                             | 6593151000006119  | 397809001       | 2916444013 |
| Intracran inj NOS + open intracran wnd+>24hr LOC -restored                                                                                                                   | 746591000006115   | 127296001       | 584010     |
| Intracranial inj NOS no open intracran wnd+>24hr LOC+recover                                                                                                                 | 768841000006116   | 127296001       | 584010     |
| Intracranial injury, excluding those with skull fracture NOS                                                                                                                 | 768961000006113   | 54355006        | 90339018   |
| Intracranial inj NOS + open intracranial wnd + 1-24hr LOC                                                                                                                    | 769331000006111   | 127296001       | 584010     |
| Intracranial inj NOS + open intracranial wnd + unspec consc                                                                                                                  | 769341000006118   | 127296001       | 584010     |
| Injury of blood vessels of head, NEC                                                                                                                                         | 776021000006111   | 85564003        | 141827011  |
| Focal traumatic haemorrhage of brainstem                                                                                                                                     | 7834401000006115  | 722623009       | 3332922012 |
| Extradural haemorrhage following injury with open intracranial wound AND prolonged loss of consciousness (more than 24 hours) without return to pre-existing conscious level | 659951000006118   | 86182004        | 506960017  |
| Extradural haemorrhage following injury with open intracranial wound AND brief loss of consciousness (less than one hour)                                                    | 660011000006116   | 73308006        | 502406019  |
| Secondary hemorrhage of brainstem due to traumatic injury                                                                                                                    | 7840871000006116  | 723139008       | 3334701012 |
| Cerebellar contusion with open intracranial wound AND moderate loss of consciousness (1-24 hours)                                                                            | 3427941000006119  | 57099002        | 94960012   |
| Subarach h'ge inj + open intracran wnd+LOC unspec duration                                                                                                                   | 123301000006118   | 5251007         | 9804011    |
| Subarachnoid h'ge inj no open intracran wnd+>24 LOC+recovery                                                                                                                 | 123401000006110   | 28048009        | 46957015   |
| Subdural h'ge inj + open intracran wnd+LOC unspec duration                                                                                                                   | 124051000006118   | 209956005       | 320770015  |
| Extradural h'ge inj + open intracran wnd+concussion unspec                                                                                                                   | 659981000006114   | 65189006        | 108332012  |
| Extradural h'ge inj no open intracran wnd+>24hr LOC-restored                                                                                                                 | 660051000006115   | 43216008        | 72101019   |
| Sequela of traumatic intracranial hemorrhage                                                                                                                                 | 8031561000006113  | 100581000119102 | 2967672017 |
| Closed #skull bse no intracranial injury, >24hr LOC+recovery                                                                                                                 | 560071000006118   | 27644009        | 46274013   |

|                                                                                                                                                                                |                   |           |                  |
|--------------------------------------------------------------------------------------------------------------------------------------------------------------------------------|-------------------|-----------|------------------|
| Closed #skull NOS + intracranial inj, no loss of consc                                                                                                                         | 560171000006117   | 371162008 | 1209864014       |
| Closed #skull NOS no intracranial inj, no loss of consc                                                                                                                        | 560241000006116   | 371162008 | 1209864014       |
| Closed #skull NOS no intracranial inj,>24hr LOC not restored                                                                                                                   | 560261000006117   | 371162008 | 1209864014       |
| Extradural haemorrhage after injury                                                                                                                                            | 5459181000006112  | 262949005 | 391029012        |
| Extradural hemorrhage following injury with open intracranial wound AND concussion                                                                                             | 2951811000006110  | 28155008  | 47133012         |
| Head injury with hemorrhage from ear                                                                                                                                           | 4063231000006110  | 95848000  | 158757013        |
| Subarachnoid hemorrhage following injury with open intracranial wound AND prolonged loss of consciousness (more than 24 hours) AND return to pre-existing conscious level      | 11903591000006111 | 73439007  | 121954015        |
| Traumatic subdural hematoma with open intracranial wound                                                                                                                       | 6053311000006111  | 315047001 | 459513015        |
| Traumatic subdural intracranial hemorrhage                                                                                                                                     | 4854351000006115  | 209987007 | 2912507014       |
| Traumatic subdural hemorrhage                                                                                                                                                  | 4854331000006110  | 209987007 | 320837018        |
| Fracture of frontonasoehtmoidal complex with increased intercanthal distance                                                                                                   | 5461381000006115  | 263154009 | 391284014        |
| Traumatic brain injury with loss of consciousness                                                                                                                              | 4396281000006118  | 127298000 | 586012           |
| Subdural h'ge inj no open intracran wnd+LOC unspec duration                                                                                                                    | 124141000006116   | 209947002 | 320752018        |
| Sequelae of other nontraumatic intracranial haemorrhage                                                                                                                        | 149551000006111   | 363302008 | 482447013        |
| Open #skull vlt + intracranial injury, unspec state of consc                                                                                                                   | 263791000006119   | 207705002 | 318135012        |
| Open #skull/face, mult + intracranial inj, no loss consc                                                                                                                       | 263931000006116   | 5468008   | 10127011         |
| Open #skull NOS + intracranial inj, 1-24hrs loss of consc                                                                                                                      | 264291000006110   | 371161001 | 1209863015       |
| Open #skull NOS + intracranial inj, no loss of consc                                                                                                                           | 264311000006114   | 371161001 | 1209863015       |
| Open #skull NOS + intracranial inj, unspec state of consc                                                                                                                      | 264321000006118   | 371161001 | 1209863015       |
| Focal traumatic hemorrhage of brainstem                                                                                                                                        | 7834411000006117  | 722623009 | 3332921017       |
| Open #skull NOS + intracranial inj + concussion unspec                                                                                                                         | 264261000006119   | 371161001 | 1209863015       |
| Intracranial haemorrhage following injury with open intracranial wound AND loss of consciousness                                                                               | 2710741000006110  | 13289004  | 475195013        |
| Subarachnoid haemorrhage following injury with open intracranial wound AND prolonged loss of consciousness (more than 24 hours) without return to pre-existing conscious level | 3625151000006114  | 69178005  | 3625151000006114 |
| Intracranial hemorrhage following injury                                                                                                                                       | 7378281000006118  | 450410005 | 2915467017       |
| Intracranial injury with prolonged coma with open wound                                                                                                                        | 455461018         | 311829000 | 455461018        |
| Head injury with haemorrhage from nose                                                                                                                                         | 4395871000006112  | 127276009 | 474087019        |
| Temporal resolution test                                                                                                                                                       | 5598691000006114  | 277391005 | 413892012        |
| Closed fracture of vault of skull with intracranial injury, with more than 24 hours loss of consciousness and return to pre-existing conscious level                           | 560291000006113   | 207692002 | 318122015        |
| Cortex contusion with open intracranial wound, with no loss of consciousness                                                                                                   | 597721000006118   | 209845006 | 320613015        |
| Extradural haemorrhage following injury with open intracranial wound AND moderate loss of consciousness (1-24 hours)                                                           | 659971000006111   | 59648004  | 498503011        |

|                                                                                                                                                                      |                   |                 |                  |
|----------------------------------------------------------------------------------------------------------------------------------------------------------------------|-------------------|-----------------|------------------|
| Traumatic intracranial haemorrhage                                                                                                                                   | 660121000006113   | 450410005       | 2915482010       |
| Intracranial haemorrhage following injury with open intracranial wound and prolonged loss of consciousness (more than 24 hours) without return to pre-existing level | 4198361000006112  | 111671004       | 364052019        |
| Injury of multiple blood vessels of head AND/OR neck                                                                                                                 | 2601561000006119  | 6378004         | 11573012         |
| Multiple open fractures of skull AND/OR face without intracranial injury                                                                                             | 2829351000006110  | 20714001        | 34857016         |
| Closed traumatic subdural intracranial hemorrhage                                                                                                                    | 4854151000006118  | 209947002       | 2912529013       |
| Traumatic intracranial extradural haematoma                                                                                                                          | 5459201000006113  | 262949005       | 2916480013       |
| Traumatic subdural haemorrhage confined to region of tentorium                                                                                                       | 7834501000006119  | 722628000       | 3327785019       |
| Extradural haemorrhage following injury with open intracranial wound AND loss of consciousness                                                                       | 4198441000006117  | 111681000       | 364077018        |
| Other cerebral haemorrhage following injury NOS                                                                                                                      | 320897016         | 450418003       | 2916363013       |
| Non-traumatic hematoma of subdural space of neuraxis                                                                                                                 | 7375011000006110  | 449797005       | 2913008017       |
| Craniotomy and removal of haematoma from extradural space                                                                                                            | 7312951000006114  | 445746008       | 2883205017       |
| Extradural haemorrhage following injury without open intracranial wound AND with moderate loss of consciousness (1-24 hours)                                         | 3523671000006117  | 62973004        | 499442016        |
| Steroid injection of greater occipital nerve                                                                                                                         | 552331000000115   | 307951000000101 | 552331000000115  |
| Subdural haemorrhage following injury with open intracranial wound AND moderate loss of consciousness (1-24 hours)                                                   | 3965681000006115  | 90165008        | 3965681000006115 |
| Extradural hemorrhage following injury without open intracranial wound                                                                                               | 3196371000006118  | 43216008        | 72101019         |
| Traumatic brain injury with brief loss of consciousness                                                                                                              | 4396291000006115  | 127299008       | 587015           |
| Traumatic intracranial subarachnoid haemorrhage                                                                                                                      | 5459271000006119  | 262955000       | 391048011        |
| Subdural hemorrhage following injury without open intracranial wound                                                                                                 | 4854171000006111  | 209947002       | 2915477015       |
| Traumatic intracranial subarachnoid hemorrhage                                                                                                                       | 5459291000006118  | 262955000       | 391047018        |
| Non-traumatic spinal subdural hematoma                                                                                                                               | 6028581000006119  | 313304007       | 457178019        |
| Laceration of brain with open intracranial wound                                                                                                                     | 2863601000006110  | 22819008        | 38306018         |
| Injury of extracranial vessel of head                                                                                                                                | 7863871000006119  | 725002006       | 3436884013       |
| Cerebral hemorrhage following injury                                                                                                                                 | 7378411000006114  | 450418003       | 2915447014       |
| Fracture of frontonasoethmoidal complex                                                                                                                              | 5461371000006118  | 263153003       | 391283015        |
| Chronic non-traumatic intracranial subdural hemorrhage                                                                                                               | 7497201000006112  | 609382000       | 2959747017       |
| Brain stem contusion with open intracranial wound                                                                                                                    | 3784231000006114  | 78968003        | 131037016        |
| Traumatic hematoma of subdural space of neuraxis                                                                                                                     | 7374991000006117  | 449796001       | 2913015013       |
| Traumatic cranial subarachnoid haemorrhage                                                                                                                           | 5459301000006117  | 262955000       | 391049015        |
| Subdural hemorrhage following injury with open intracranial wound AND moderate loss of consciousness (1-24 hours)                                                    | 11903641000006118 | 90165008        | 149462011        |
| Traumatic intracranial hemorrhage                                                                                                                                    | 7378301000006119  | 450410005       | 2915928019       |
| Lobotomy - brain                                                                                                                                                     | 5559181000006119  | 273991000       | 409720015        |
| Subarachnoid haemorrhage following injury with open intracranial wound AND concussion                                                                                | 3284981000006111  | 48518008        | 495117010        |
| Extradural hemorrhage following injury without open intracranial wound AND with loss of consciousness                                                                | 3965891000006118  | 90178008        | 149485012        |

|                                                                                                                                                                                |                   |           |                  |
|--------------------------------------------------------------------------------------------------------------------------------------------------------------------------------|-------------------|-----------|------------------|
| Traumatic spinal extradural hematoma                                                                                                                                           | 5456221000006111  | 262720008 | 390719016        |
| Cerebral haemorrhage following injury                                                                                                                                          | 505322013         | 450418003 | 2916363013       |
| Traumatic cerebral haemorrhage                                                                                                                                                 | 505324014         | 450418003 | 2916058017       |
| Traumatic haematoma of subdural space of neuraxis                                                                                                                              | 7374981000006115  | 449796001 | 2912448014       |
| Extradural haemorrhage following injury with open intracranial wound                                                                                                           | 3559941000006115  | 65189006  | 3559941000006115 |
| Subdural haemorrhage following injury with open intracranial wound and prolonged loss of consciousness (more than 24 hours) and without return to pre-existing conscious level | 124041000006115   | 111677000 | 364064010        |
| Open fracture of vault of skull with intracranial injury, with no loss of consciousness                                                                                        | 263781000006117   | 207707005 | 318137016        |
| Open fracture of base of skull with intracranial injury, with no loss of consciousness                                                                                         | 264161000006114   | 207745006 | 318189014        |
| Open traumatic subdural intracranial hemorrhage                                                                                                                                | 4854221000006117  | 209956005 | 2912899010       |
| Extradural haemorrhage following injury with open intracranial wound AND prolonged loss of consciousness (more than 24 hours) without return to pre-existing conscious level   | 3901101000006118  | 86182004  | 3901101000006118 |
| Vestibular trauma due to head injury                                                                                                                                           | 4062681000006118  | 95817008  | 512313010        |
| Brain injury without open intracranial wound AND with prolonged loss of consciousness (more than 24 hours) without return to pre-existing conscious level                      | 3267451000006119  | 47462004  | 79134018         |
| Intracranial haemorrhage following injury with open intracranial wound AND prolonged loss of consciousness (more than 24 hours) AND return to pre-existing conscious level     | 3982281000006110  | 91216000  | 509357015        |
| Haemorrhage of brainstem due to traumatic injury                                                                                                                               | 7834641000006116  | 722632006 | 3332942015       |
| Intracranial haemorrhage following injury without open intracranial wound AND with loss of consciousness                                                                       | 2793481000006115  | 18485009  | 478644014        |
| Extradural hemorrhage following injury with open intracranial wound AND prolonged loss of consciousness (more than 24 hours) without return to pre-existing conscious level    | 11924641000006113 | 86182004  | 142911018        |
| Intracerebral injury                                                                                                                                                           | 4396221000006117  | 127294003 | 474102014        |
| Closed #skull bse + intracranial inj, unspec state of consc                                                                                                                    | 559961000006110   | 111603000 | 178853015        |
| Closed #skull NOS + intracranial inj, LOC unspec duration                                                                                                                      | 560161000006112   | 371162008 | 1209864014       |
| Closed #skull NOS + intracranial inj, unspec state of consc                                                                                                                    | 560181000006119   | 371162008 | 1209864014       |
| Closed #skull NOS no intracranial inj, 1-24hr loss of consc                                                                                                                    | 560221000006111   | 371162008 | 1209864014       |
| Closed #skull/face, mult + intracranial inj, 1-24hrs LOC                                                                                                                       | 560441000006115   | 5468008   | 10127011         |
| Closed #skull/face, mult + intracranial inj, unspec consc                                                                                                                      | 560461000006116   | 5468008   | 10127011         |
| Mult #skull/face + other bones, open + intracranial injury                                                                                                                     | 696121000006114   | 5468008   | 10127011         |
| Extradural haemorrhage following injury with open intracranial wound AND brief loss of consciousness (less than one hour)                                                      | 3692151000006113  | 73308006  | 3692151000006113 |
| Subdural hemorrhage following injury with open intracranial wound and prolonged loss of consciousness (more than 24 hours) and without return to pre-existing conscious level  | 4198411000006116  | 111677000 | 61538012         |

|                                                                                                                                                                                    |                   |           |            |
|------------------------------------------------------------------------------------------------------------------------------------------------------------------------------------|-------------------|-----------|------------|
| Evacuation of intracerebral hematoma                                                                                                                                               | 2666411000006111  | 10458001  | 18195013   |
| Nontraumatic extradural hemorrhage                                                                                                                                                 | 6593111000006115  | 397809001 | 1774439018 |
| Closed fracture of base of skull with intracranial injury, with more than 24 hours loss of consciousness and return to pre-existing conscious level                                | 559991000006119   | 207730004 | 318174017  |
| Closed fracture of base of skull with intracranial injury, with 1-24 hours loss of consciousness                                                                                   | 560001000006112   | 207729009 | 318173011  |
| Closed fracture of base of skull with intracranial injury, with no loss of consciousness                                                                                           | 560021000006119   | 207727006 | 318171013  |
| Closed fracture of vault of skull with intracranial injury, with 1-24 hours loss of consciousness                                                                                  | 560301000006114   | 207691009 | 318121010  |
| Cortex contusion with open intracranial wound, with 1-24 hours loss of consciousness                                                                                               | 597701000006111   | 209848008 | 320616011  |
| Intracranial nontraumatic haemorrhage of foetus and newborn                                                                                                                        | 744871000006114   | 206417009 | 2791314016 |
| Hind brain contusion with open intracranial wound, with less than 1 hour loss of consciousness                                                                                     | 823401000006116   | 209884001 | 320655012  |
| Hind brain laceration with open intracranial wound, with less than 1 hour loss of consciousness                                                                                    | 823531000006111   | 209903008 | 320675015  |
| Subarachnoid hemorrhage following injury without open intracranial wound AND with loss of consciousness                                                                            | 3629581000006110  | 69458009  | 115392016  |
| Traumatic subdural haematoma with open intracranial wound                                                                                                                          | 459514014         | 315047001 | 459514014  |
| Intracranial haematoma following injury                                                                                                                                            | 486896012         | 37955001  | 486896012  |
| Open fracture of vault of skull with intracranial injury, with more than 24 hours loss of consciousness and return to pre-existing conscious level                                 | 52931000006111    | 207710003 | 318140016  |
| Brain stem contusion with open intracranial wound AND loss of consciousness                                                                                                        | 3579631000006117  | 66393002  | 110266011  |
| Intracranial haemorrhage following injury without open intracranial wound AND with prolonged loss of consciousness (more than 24 hours) AND return to pre-existing conscious level | 3776591000006112  | 78477003  | 503848012  |
| Intracranial haemorrhage following injury without open intracranial wound AND with no loss of consciousness                                                                        | 3098131000006113  | 37134004  | 486631018  |
| Open #skull/face, mult + intracran inj, LOC unspec duration                                                                                                                        | 263911000006110   | 5468008   | 10127011   |
| Open #skull/face, mult + intracranial inj, <1hr LOC                                                                                                                                | 263921000006119   | 5468008   | 10127011   |
| Open #skull bse + intracranial injury, LOC unspec duration                                                                                                                         | 264151000006112   | 111607004 | 178855010  |
| Hind brain laceration with open intracranial wound, with no loss of consciousness                                                                                                  | 823561000006119   | 209902003 | 320674016  |
| Subarachnoid haemorrhage following injury with open intracranial wound AND prolonged loss of consciousness (more than 24 hours) AND return to pre-existing conscious level         | 123281000006117   | 73439007  | 502436011  |
| Extradural haemorrhage following injury with open intracranial wound AND prolonged loss of consciousness (more than 24 hours) AND return to pre-existing conscious level           | 659961000006116   | 81520002  | 504713019  |
| Intracranial haemorrhage following injury with open intracranial wound                                                                                                             | 3765291000006112  | 77768006  | 503672016  |
| Extradural hemorrhage following injury with open intracranial wound AND brief loss of consciousness (less than one hour)                                                           | 11924661000006112 | 73308006  | 121738013  |
| Intracranial haemorrhage following injury without open intracranial wound AND with concussion                                                                                      | 3781101000006114  | 78757009  | 503910018  |

|                                                                                                                                                         |                  |           |            |
|---------------------------------------------------------------------------------------------------------------------------------------------------------|------------------|-----------|------------|
| Intracranial haemorrhage following injury with moderate loss of consciousness                                                                           | 4396471000006117 | 127310009 | 474111014  |
| Birth brain damage NOS                                                                                                                                  | 513921000006111  | 240312009 | 359984010  |
| Closed #skull bse no intracranial inj, LOC unspec duration                                                                                              | 560031000006116  | 27644009  | 46274013   |
| Closed #skull bse no intracranial injury, no loss of consc                                                                                              | 560091000006117  | 27644009  | 46274013   |
| Closed #skull bse no intracranial injury, unspec state consc                                                                                            | 560101000006111  | 24063002  | 40395011   |
| Closed #skull NOS + intracranial inj + concussion unspec                                                                                                | 560111000006114  | 371162008 | 1209864014 |
| Closed #skull NOS no intracranial inj + concussion unspec                                                                                               | 560191000006116  | 371162008 | 1209864014 |
| Closed #skull/face, mult + intracranial inj, <1hr LOC                                                                                                   | 560431000006113  | 5468008   | 10127011   |
| Cortex cont + open intracranial wound + concussion unspec                                                                                               | 597711000006114  | 209843004 | 320611018  |
| Cortex lacn no open intracranial wnd + >24hr LOC + recovery                                                                                             | 597931000006118  | 78914008  | 130942015  |
| Cortex lacn no open intracranial wnd +>24hr LOC not restored                                                                                            | 597961000006110  | 78914008  | 130942015  |
| Non-traumatic intracranial subdural haematoma                                                                                                           | 5656921000006118 | 281864001 | 419994017  |
| Multiple traumatic haemorrhages of brain tissue                                                                                                         | 7834651000006119 | 722633001 | 3332945018 |
| Epidural haemorrhage                                                                                                                                    | 505381016        | 82999001  | 505381016  |
| Subarachnoid hemorrhage following injury with open intracranial wound AND loss of consciousness                                                         | 3727881000006110 | 75507000  | 125412015  |
| Subdural haemorrhage following injury with open intracranial wound AND loss of consciousness                                                            | 3237311000006119 | 45659008  | 494311012  |
| Open fracture of base of skull with intracranial injury, with 1-24 hours loss of consciousness                                                          | 264141000006110  | 207747003 | 318191018  |
| Brain contusion with open intracranial wound, with more than 24 hours loss of consciousness and return to pre-existing conscious level                  | 524301000006112  | 209923009 | 320695014  |
| Closed fracture of base of skull with intracranial injury, with more than 24 hours loss of consciousness without return to pre-existing conscious level | 559951000006113  | 207731000 | 318175016  |
| Cortex contusion with open intracranial wound, with less than 1 hour loss of consciousness                                                              | 597691000006111  | 209847003 | 320615010  |
| Extradural haemorrhage following injury with open intracranial wound, with no loss of consciousness                                                     | 660021000006112  | 209978003 | 320817017  |
| Subdural hemorrhage following injury                                                                                                                    | 4854341000006117 | 209987007 | 320838011  |
| Closed traumatic subdural intracranial haemorrhage                                                                                                      | 4854161000006116 | 209947002 | 2912797018 |
| Non-traumatic haematoma of subdural space of neuraxis                                                                                                   | 7375001000006112 | 449797005 | 2912549016 |
| Cerebellar laceration with open intracranial wound AND moderate loss of consciousness (1-24 hours)                                                      | 3879281000006119 | 84803006  | 140595014  |
| Intracranial haemorrhage following injury with prolonged loss of consciousness AND return to pre-existing conscious level                               | 4396491000006116 | 127311008 | 474112019  |
| Subarachnoid haemorrhage following injury without open intracranial wound                                                                               | 402929011        | 28048009  | 483737017  |
| Subdural hemorrhage - nontraumatic                                                                                                                      | 4777911000006112 | 195176009 | 300293019  |
| Extradural hemorrhage after injury                                                                                                                      | 5459171000006114 | 262949005 | 391027014  |
| Subdural haemorrhage following injury with open intracranial wound                                                                                      | 4854241000006112 | 209956005 | 2916362015 |

|                                                                                                                                                                                   |                  |                 |            |
|-----------------------------------------------------------------------------------------------------------------------------------------------------------------------------------|------------------|-----------------|------------|
| Intracranial haemorrhage following injury without intracranial wound AND with moderate loss of consciousness (1-24 hours)                                                         | 3589021000006119 | 66976009        | 500582010  |
| Craniotomy with treatment of penetrating wound of brain                                                                                                                           | 3786211000006110 | 79093007        | 131239012  |
| Subarachnoid hemorrhage following injury without open intracranial wound AND with moderate loss of consciousness (1-24 hours)                                                     | 4198391000006116 | 111673001       | 195613013  |
| Brain stem laceration without open intracranial wound AND with prolonged loss of consciousness (more than 24 hours) without return to pre-existing conscious level                | 3596181000006113 | 67378005        | 111973015  |
| Brain stem contusion with open intracranial wound AND prolonged loss of consciousness (more than 24 hours) AND return to pre-existing conscious level                             | 2767251000006115 | 16837005        | 28508011   |
| Subdural hemorrhage following injury with open intracranial wound                                                                                                                 | 4854231000006119 | 209956005       | 2915474010 |
| Concussion of periodontal ligament                                                                                                                                                | 5462911000006115 | 263275009       | 391448016  |
| Extradural haemorrhage following injury with open intracranial wound AND concussion                                                                                               | 2951801000006112 | 28155008        | 483768018  |
| Hind brain contusion with open intracranial wound, with no loss of consciousness                                                                                                  | 823411000006118  | 209883007       | 320654011  |
| Hind brain laceration with open intracranial wound, with 1-24 hours loss of consciousness                                                                                         | 823541000006118  | 209904002       | 320676019  |
| Subdural hemorrhage following injury without open intracranial wound AND with prolonged loss of consciousness (more than 24 hours) without return to pre-existing conscious level | 3652491000006116 | 70861009        | 117705011  |
| Traumatic extradural hematoma                                                                                                                                                     | 5459161000006119 | 262949005       | 391026017  |
| Subarachnoid haemorrhage following injury without open intracranial wound AND with concussion                                                                                     | 2567821000006112 | 4332009         | 493572019  |
| Intracranial hemorrhage following injury with open intracranial wound AND no loss of consciousness                                                                                | 2624491000006117 | 7819003         | 13934013   |
| Intracranial haemorrhage following injury with intracranial wound AND moderate loss of consciousness (1-24 hours)                                                                 | 3055541000006111 | 34501004        | 485859011  |
| Auditory cranial nerve injury                                                                                                                                                     | 511287019        | 9441002         | 511287019  |
| Traumatic cerebral oedema with open intracranial wound                                                                                                                            | 455458019        | 311826007       | 455458019  |
| Injury of intracranial vessel of head                                                                                                                                             | 7815641000006111 | 721328009       | 3324974017 |
| Oth cerebral laceration/contusion + open intracranial wound                                                                                                                       | 39841000006117   | 269144002       | 402921014  |
| Subdural h'ge inj no open intracranial wound+<1hr loss consc                                                                                                                      | 124181000006110  | 209947002       | 320752018  |
| Extradural haemorrhage following injury without open intracranial wound                                                                                                           | 402930018        | 43216008        | 493552012  |
| Open fracture of vault of skull with intracranial injury, with more than 24 hours loss of consciousness without return to pre-existing conscious level                            | 264421000006112  | 207711004       | 318141017  |
| Primary traumatic hemorrhage of brainstem                                                                                                                                         | 7840841000006112 | 723138000       | 3334696017 |
| Traumatic brain injury of unknown intent                                                                                                                                          | 7638391000006118 | 708728007       | 3083294016 |
| Intracranial hemorrhage following injury with open intracranial wound AND prolonged loss of consciousness (more than 24 hours) AND return to pre-existing conscious level         | 3982291000006113 | 91216000        | 151139013  |
| Sequela of traumatic intracranial haemorrhage                                                                                                                                     | 8031551000006111 | 100581000119102 | 2967472012 |



|                                                                                                                        |                   |           |            |
|------------------------------------------------------------------------------------------------------------------------|-------------------|-----------|------------|
| Intracranial hemorrhage following injury without open intracranial wound AND with no loss of consciousness             | 3098141000006115  | 37134004  | 61953011   |
| Brain stem laceration with open intracranial wound AND no loss of consciousness                                        | 2804791000006111  | 19210000  | 32368010   |
| Intracranial inj NOS no open intracran wnd + unspec consc                                                              | 768821000006111   | 127296001 | 584010     |
| Intracranial injury NOS + open intracranial wound                                                                      | 768911000006110   | 127296001 | 584010     |
| Intracranial injury NOS no open intracranial wound                                                                     | 768921000006119   | 127296001 | 584010     |
| Injury to blood vessels of head and neck                                                                               | 774541000006119   | 85564003  | 141827011  |
| Hind brain lacn + open intracranial wnd + concussion unspec                                                            | 823551000006116   | 209900006 | 320672017  |
| Hind brain lacn + open intracranial wnd + unspec state consc                                                           | 823571000006114   | 209900006 | 320672017  |
| Subdural h'ge inj no open intracran wound+concussion unspec                                                            | 124151000006119   | 209947002 | 320752018  |
| Subdural h'ge inj no open intracranial wnd + unspec consc                                                              | 124161000006117   | 209947002 | 320752018  |
| Subdural h'ge inj no open intracranial wnd+>24 LOC +recovery                                                           | 124171000006112   | 209947002 | 320752018  |
| Traumatic cerebral haemorrhage                                                                                         | 12757931000006114 | 82894007  | 505324014  |
| Traumatic cerebral hemorrhage                                                                                          | 12757881000006115 | 82894007  | 137503010  |
| Complex wound of head with avulsive loss of part of skull and cranial contents                                         | 7840931000006112  | 723143007 | 3334711017 |
| Nontraumatic subarachnoid intracranial haemorrhage                                                                     | 5518111000006112  | 270907008 | 3449602014 |
| Hemorrhage of brainstem due to traumatic injury                                                                        | 7834631000006114  | 722632006 | 3332941010 |
| Subdural hemorrhage following injury with open intracranial wound AND brief loss of consciousness (less than one hour) | 2976661000006116  | 29635000  | 49572012   |
| Nontraumatic intracranial hemorrhage                                                                                   | 3533577011        | 738779002 | 3533577011 |
| Traumatic intracranial subdural hematoma                                                                               | 5459241000006110  | 262952002 | 391038014  |
| Secondary traumatic hemorrhage of brainstem                                                                            | 7840861000006111  | 723139008 | 3334699012 |
| Oth cereb h'ge inj + open intracran wnd+concussion unspec                                                              | 39711000006113    | 450418003 | 2915288012 |
| Oth cerebral h'ge inj no open intracranial wnd+no loss consc                                                           | 39831000006110    | 450418003 | 2915288012 |
| Subarach h'ge inj no open intracran wnd+LOC unspec duration                                                            | 123331000006114   | 28048009  | 46957015   |
| Subdural h'ge inj + open intracranial wnd+concussion unspec                                                            | 124081000006114   | 209956005 | 320770015  |
| Extradural h'ge inj no open intracran wnd+concussion unspec                                                            | 660071000006113   | 262949005 | 391026017  |
| Cortex contusion without open intracranial wound AND with loss of consciousness                                        | 2777751000006115  | 17498002  | 29575016   |
| Cerebellar laceration with open intracranial wound AND brief loss of consciousness (less than one hour)                | 2651541000006113  | 9501009   | 16628012   |
| Focal hemorrhagic contusion of cerebrum                                                                                | 7834271000006110  | 722615007 | 3332902013 |

**Table S19. Spinal Injury Aurum codes**

| Term                              | Medcode ID       | SNOMED CT<br>Concept ID | SNOMED CT<br>Description ID |
|-----------------------------------|------------------|-------------------------|-----------------------------|
| Injury of spinal cord vasculature | 5456141000006113 | 262715008               | 390711018                   |

**Table S20. Eye Injury Aurum codes**

| Term                                      | Medcode ID        | SNOMED CT<br>Concept ID | SNOMED CT<br>Description ID |
|-------------------------------------------|-------------------|-------------------------|-----------------------------|
| Haemophthalmos, except current injury     | 4771081000006111  | 193287005               | 2550868017                  |
| Hemophthalmos, except current injury      | 4771091000006114  | 193287005               | 2550869013                  |
| Perforating injury of both eyeballs       | 3515113016        | 735658005               | 3515113016                  |
| Haemophthalmos without current injury     | 4771041000006117  | 193287005               | 2547718010                  |
| Bilateral penetrating injury of eyeball   | 3515111019        | 735657000               | 3515111019                  |
| Repair of penetrating eye injury          | 8255451000006117  | 800491000000104         | 1789891000000113            |
| Haemophthalmos (excluding current injury) | 297686013         | 193287005               | 297686013                   |
| Penetrating injury of both eyeballs       | 3515110018        | 735657000               | 3515110018                  |
| Repair of penetrating eye injury          | 11999811000006115 | 763097008               | 3637861018                  |
| Hemophthalmos without current injury      | 4771071000006113  | 193287005               | 2547719019                  |
| Haemorrhage into cornea                   | 5029221000006110  | 231916005               | 347514014                   |

**Table S21. Estimated glomerular filtration rate Aurum codes**

| Term                                                 | Medcode ID       | SNOMED CT<br>Concept ID | SNOMED CT<br>Description ID |
|------------------------------------------------------|------------------|-------------------------|-----------------------------|
| EgfrUsingCreatinine(ckd-epi)Per1.73SquareMetres      | 1942831000006114 | 1011481000000105        | 2579541000000113            |
| EstimatedCreatinineClearance                         | 2470380013       | 395680003               | 2470380013                  |
| EstimatedCreatinineClearance(cockcroft-gaultFormula) | 2465711000000116 | 968191000000100         | 2465711000000116            |
| GlomerularFiltrationRate                             | 133205018        | 80274001                | 133205018                   |
| SerumCreatinine                                      | 380389013        | 1000731000000107        | 2577271000000111            |
| GfrCalculatedAbbreviatedMdrd                         | 976481000006110  | 1020291000000106        | 2569781000000116            |

**Table S22. Azole Aurum codes**

| Term                       | Medcode ID       | SNOMED CT<br>Concept ID | SNOMED CT<br>Description ID |
|----------------------------|------------------|-------------------------|-----------------------------|
| Atherosclerosis aorta      | 3830431000006112 | 81817003                | 2923328010                  |
| Aortic thromboembolism     | 5560171000006116 | 274101000               | 409861010                   |
| Aortoiliac atherosclerosis | 5057931000006110 | 233956002               | 350530011                   |
| Aortic atherosclerosis     | 218531000000113  | 81817003                | 135728018                   |

**Table S23. Dementia Aurum codes**

| Term                                                                                             | Medcode ID       | SNOMED CT Concept ID | SNOMED CT Description ID |
|--------------------------------------------------------------------------------------------------|------------------|----------------------|--------------------------|
| H/O: dementia                                                                                    | 251625013        | 161465002            | 251625013                |
| [X]Predominantly cortical dementia                                                               | 423221000006117  | 56267009             | 93568017                 |
| [X]Presenile dementia,Alzheimer's type                                                           | 423351000006115  | 416780008            | 2957138011               |
| [X]Primary degen dementia, Alzheimer's type, presenile onset                                     | 423391000006114  | 416780008            | 2957119019               |
| Lewy body variant of Alzheimer's disease                                                         | 3802621000006119 | 80098002             | 132894011                |
| SDLT - Senile dementia of the Lewy body type                                                     | 3802631000006116 | 80098002             | 1234435012               |
| [X]Senile dementia,Alzheimer's type                                                              | 425901000006116  | 416975007            | 2957124016               |
| Dementia associated with alcoholism                                                              | 2502971000006115 | 281004               | 1557018                  |
| Senile dementia with depressive or paranoid features NOS                                         | 294647019        | 191457008            | 294644014                |
| [X]Vascular dementia, unspecified                                                                | 295681016        | 429998004            | 2770951017               |
| [X]Dementia in other specified diseases classif elsewhere                                        | 295690011        | 191519005            | 2547722017               |
| Dementia infantilis                                                                              | 3670601000006111 | 71961003             | 119578017                |
| Dementia co-occurrent and due to Pick's disease                                                  | 8009541000006119 | 21921000119103       | 3333186018               |
| Dementia due to Picks disease                                                                    | 8009521000006114 | 21921000119103       | 2987132018               |
| ADC - Acquired immune deficiency syndrome dementia complex                                       | 6973451000006113 | 421529006            | 2622766016               |
| Alzheimer's disease with early onset                                                             | 499946014        | 416780008            | 2957141019               |
| Alzheimer's disease with late onset                                                              | 500317011        | 416975007            | 2957124016               |
| Dementia in Alzheimer's disease with early onset, other symptoms, predominantly delusional       | 1971541000006114 | 1971541000006105     | 1971541000006114         |
| Dementia in Alzheimer's disease with early onset, other symptoms, predominantly hallucinatory    | 1971771000006112 | 1971771000006108     | 1971771000006112         |
| Unspecified dementia, other symptoms, predominantly delusional                                   | 1972041000006114 | 1972041000006105     | 1972041000006114         |
| Unspecified dementia, other symptoms, predominantly hallucinatory                                | 1972061000006113 | 1972061000006109     | 1972061000006113         |
| Dementia in Alzheimer's disease with late onset, other symptoms, predominantly delusional        | 1972181000006119 | 1972181000006103     | 1972181000006119         |
| Dementia in Alzheimer's disease with late onset, other symptoms, predominantly depressive        | 1972201000006118 | 1972201000006102     | 1972201000006118         |
| Dementia in Alzheimer's disease with late onset, other mixed symptoms                            | 1972211000006115 | 1972211000006104     | 1972211000006115         |
| Dementia in Alzheimer's dis, atypical or mixed type, other symptoms, predominantly hallucinatory | 1972291000006113 | 1972291000006109     | 1972291000006113         |
| Vascular dementia of acute onset, other symptoms, predominantly hallucinatory                    | 1972521000006114 | 1972521000006105     | 1972521000006114         |
| Subcortical vascular dementia, other symptoms, predominantly depressive                          | 1972771000006116 | 1972771000006100     | 1972771000006116         |
| Mixed cortical and subcortical vascular dementia, other symptoms, predominantly hallucinatory    | 1972871000006113 | 1972871000006109     | 1972871000006113         |
| Mixed cortical and subcortical vascular dementia, other symptoms, predominantly depressive       | 1972911000006111 | 1972911000006107     | 1972911000006111         |
| Mental and behav dis due to hallucinogens: resid & late-onset psychot dis, dementia              | 1973711000006116 | 1973711000006100     | 1973711000006116         |
| Presenile dementia                                                                               | 21256010         | 12348006             | 21256010                 |
| Senile dementia                                                                                  | 26545010         | 15662003             | 26545010                 |

|                                                                                                  |                  |                  |                  |
|--------------------------------------------------------------------------------------------------|------------------|------------------|------------------|
| Alzheimer's disease                                                                              | 45046017         | 26929004         | 45046017         |
| VAD - Vascular dementia                                                                          | 3414251000006112 | 56267009         | 497560014        |
| Dementia due to Creutzfeldt-Jakob disease                                                        | 7103601000006116 | 429458009        | 2693170019       |
| Primary degenerative dementia of the Alzheimer type, late onset                                  | 6900191000006112 | 416975007        | 2554010014       |
| Transmissible virus dementia                                                                     | 2511001000006119 | 792004           | 2164150017       |
| Binswanger's dementia                                                                            | 3964611000006111 | 90099008         | 149345019        |
| Lewy body disease                                                                                | 745381000006119  | 80098002         | 132893017        |
| Mental and behav dis due to other stimulants inc caffeine: resid/late-onset psycht dis, dementia | 1976091000006118 | 1976091000006102 | 1976091000006118 |
| Primary degenerative dementia of the Alzheimer type, early onset                                 | 6897221000006113 | 416780008        | 2553939016       |
| Acquired immune deficiency syndrome dementia complex                                             | 6973461000006110 | 421529006        | 2622767013       |
| Dementia associated with AIDS                                                                    | 6973421000006116 | 421529006        | 2617355019       |
| MID - Multi-infarct dementia                                                                     | 3414231000006117 | 56267009         | 497558012        |
| Arteriosclerotic dementia NOS                                                                    | 294656010        | 56267009         | 497559016        |
| [X]Alzheimer's dementia unspec                                                                   | 363021000006113  | 26929004         | 45046017         |
| [D] Dementia with Lewy bodies                                                                    | 914931000006119  | 914931000006103  | 914931000006119  |
| [D] Dementia                                                                                     | 914941000006112  | 914941000006108  | 914941000006112  |
| [X] Senile dementia NOS                                                                          | 359141000006111  | 15662003         | 26545010         |
| [X]Alzheimer's disease type 2                                                                    | 363041000006118  | 416780008        | 2957119019       |
| [X]Dementia in human immunodef virus [HIV] disease                                               | 376571000006116  | 421529006        | 2622767013       |
| [X]Dementia infantalis                                                                           | 376631000006115  | 71961003         | 119576018        |
| Uncomplicated senile dementia                                                                    | 294635013        | 191449005        | 294635013        |
| Presenile dementia with delirium                                                                 | 294638010        | 191452002        | 294638010        |
| Uncomplicated arteriosclerotic dementia                                                          | 294652012        | 191463004        | 294652012        |
| Arteriosclerotic dementia with delirium                                                          | 294653019        | 191464005        | 294653019        |
| Arteriosclerotic dementia with paranoia                                                          | 294654013        | 191465006        | 294654013        |
| Arteriosclerotic dementia with depression                                                        | 294655014        | 191466007        | 294655014        |
| Dementia                                                                                         | 882171000006115  | 268612007        | 882171000006115  |
| Dementia in Alzheimer's disease - type 2                                                         | 6897271000006114 | 416780008        | 2957156011       |
| LBD - Lewy body disease                                                                          | 3802641000006114 | 80098002         | 1234436013       |
| DLBD - Diffuse Lewy body disease                                                                 | 3802661000006113 | 80098002         | 1234438014       |
| Primary degenerative dementia of the Alzheimer type, senile onset                                | 6900181000006114 | 416975007        | 2549518019       |
| Dementia of the Alzheimers type with early onset                                                 | 6897241000006118 | 416780008        | 2957133019       |
| Presenile dementia, Alzheimer's type                                                             | 6897251000006116 | 416780008        | 2957138011       |
| [X]Dementia in other diseases classified elsewhere                                               | 295684012        | 191519005        | 2547722017       |
| [X]Dementia in Pick's disease                                                                    | 295685013        | 21921000119103   | 2968126015       |
| [X]Dementia in Creutzfeldt-Jakob disease                                                         | 295686014        | 429458009        | 2695885013       |
| [X]Dementia in Parkinson's disease                                                               | 295688010        | 425390006        | 2921040013       |
| AD - Alzheimer's disease                                                                         | 2931231000006118 | 26929004         | 1225144019       |
| Dementia of the Alzheimers type, late onset                                                      | 6900201000006110 | 416975007        | 2957123010       |
| [X]Dementia in Alzheimer's disease                                                               | 295668011        | 26929004         | 45046017         |

|                                                                                               |                  |                  |                  |
|-----------------------------------------------------------------------------------------------|------------------|------------------|------------------|
| [X]Dementia in Alzheimer's disease, unspecified                                               | 295672010        | 26929004         | 45046017         |
| [X] Senile dementia, depressed or paranoid type                                               | 359151000006113  | 191457008        | 294644014        |
| Nuchal dystonia-dementia syndrome                                                             | 2966081000006114 | 28978003         | 48514014         |
| Dementia in Alzheimer's disease with early onset, without additional symptoms                 | 1971401000006111 | 1971401000006107 | 1971401000006111 |
| Mental & behav dis due to sed/hypntcs: resid & late-onset psychot dis, dementia               | 1971661000006114 | 1971661000006105 | 1971661000006114 |
| Dementia in Alzheimer's dis, atypical or mixed type, other symptoms, predominantly depressive | 1972311000006112 | 1972311000006108 | 1972311000006112 |
| Dementia in Alzheimer's dis, atypical or mixed type, other mixed symptoms                     | 1972341000006111 | 1972341000006107 | 1972341000006111 |
| Dementia in Alzheimer's disease, unspecified, without additional symptoms                     | 1972371000006115 | 1972371000006104 | 1972371000006115 |
| Mental & behav dis due to cannabinoids: resid & late-onset psychot dis, dementia              | 1972431000006113 | 1972431000006109 | 1972431000006113 |
| Vascular dementia of acute onset, other symptoms, predominantly delusional                    | 1972501000006116 | 1972501000006100 | 1972501000006116 |
| Other vascular dementia, other symptoms, predominantly depressive                             | 1973381000006112 | 1973381000006108 | 1973381000006112 |
| [RFC] Dementia                                                                                | 939491000006118  | 939491000006102  | 939491000006118  |
| Drug-induced dementia                                                                         | 294688019        | 191493005        | 294688019        |
| JCD - Jakob-Creutzfeldt disease                                                               | 2510991000006115 | 792004           | 1234326016       |
| [X] Unspecified dementia                                                                      | 359241000006119  | 52448006         | 87274019         |
| Senile dementia-acute confused                                                                | 882211000006118  | 191461002        | 882211000006118  |
| [X]Dementia in Alzheimer's disease with early onset                                           | 376531000006119  | 416780008        | 2957119019       |
| [X]Dementia in Alzheimer's disease with late onset                                            | 376541000006112  | 416975007        | 2957137018       |
| [X]Vascular dementia                                                                          | 431681000006117  | 42998004         | 2770951017       |
| [X]Vascular dementia of acute onset                                                           | 431691000006119  | 230285003        | 345110014        |
| Multi infarct dementia                                                                        | 3414261000006114 | 56267009         | 2921000019       |
| Alzheimer dementia                                                                            | 2931251000006113 | 26929004         | 3424952012       |
| [D] Vascular dementia                                                                         | 914921000006117  | 914921000006101  | 914921000006117  |
| [D] Dementia in Alzheimer's disease                                                           | 914951000006114  | 914951000006105  | 914951000006114  |
| Dementia associated with Parkinson Disease                                                    | 7043661000006117 | 425390006        | 2842012010       |
| Senile dementia with delirium                                                                 | 294648012        | 191461002        | 294648012        |
| [X]Dementia in Huntington's disease                                                           | 295687017        | 442344002        | 2820374011       |
| Alcoholic dementia NOS                                                                        | 346929012        | 281004           | 1225776018       |
| Uncomplicated presenile dementia                                                              | 294637017        | 191451009        | 294637017        |
| Senile dementia with depression                                                               | 294646011        | 191459006        | 294646011        |
| [X] Primary degenerative dementia NOS                                                         | 359101000006114  | 279982005        | 417465012        |
| [X]Alzheimer's disease type 1                                                                 | 363031000006111  | 416975007        | 2957137018       |
| Dementia due to Huntingtons disease                                                           | 7263021000006116 | 442344002        | 2951827019       |
| [X]Primary degen dementia of Alzheimer's type, senile onset                                   | 423381000006111  | 416975007        | 2957137018       |
| Presenile dementia NOS                                                                        | 294643015        | 12348006         | 21256010         |
| Mental & behav dis due to use opioids: resid & late-onset psychot dis, dementia               | 1971701000006118 | 1971701000006102 | 1971701000006118 |
| Unspecified dementia, without additional symptoms                                             | 1972021000006119 | 1972021000006103 | 1972021000006119 |
| Unspecified dementia, other mixed symptoms                                                    | 1972081000006115 | 1972081000006104 | 1972081000006115 |



|                                                                                               |                  |                  |                  |
|-----------------------------------------------------------------------------------------------|------------------|------------------|------------------|
| Dementia in Alzheimer's disease with early onset, other symptoms, predominantly depressive    | 1972131000006115 | 1972131000006104 | 1972131000006115 |
| Dementia in Alzheimer's disease with early onset, other mixed symptoms                        | 1972141000006113 | 1972141000006109 | 1972141000006113 |
| Dementia in Alzheimer's dis, atypical or mixed type, without additional symptoms              | 1972231000006114 | 1972231000006105 | 1972231000006114 |
| Dementia in Alzheimer's dis, atypical or mixed type, other symptoms, predominantly delusional | 1972251000006119 | 1972251000006103 | 1972251000006119 |
| Dementia in Alzheimer's disease, unspecified, other mixed symptoms                            | 1972471000006111 | 1972471000006107 | 1972471000006111 |
| Vascular dementia of acute onset, without additional symptoms                                 | 1972481000006114 | 1972481000006105 | 1972481000006114 |
| Multi-infarct dementia, other symptoms, predominantly delusional                              | 1972621000006113 | 1972621000006109 | 1972621000006113 |
| Multi-infarct dementia, other symptoms, predominantly depressive                              | 1972661000006119 | 1972661000006103 | 1972661000006119 |
| Subcortical vascular dementia, without additional symptoms                                    | 1972711000006113 | 1972711000006109 | 1972711000006113 |
| Subcortical vascular dementia, other symptoms, predominantly delusional                       | 1972731000006119 | 1972731000006103 | 1972731000006119 |
| Other vascular dementia, without additional symptoms                                          | 1973221000006118 | 1973221000006102 | 1973221000006118 |
| Other vascular dementia, other symptoms, predominantly delusional                             | 1973271000006117 | 1973271000006101 | 1973271000006117 |
| Other vascular dementia, other mixed symptoms                                                 | 1973401000006112 | 1973401000006108 | 1973401000006112 |
| Mental & behav dis due to use cocaine: resid & late-onset psychot dis, dementia               | 1973941000006119 | 1973941000006103 | 1973941000006119 |
| Multi infarct dementia                                                                        | 696161000006115  | 56267009         | 93568017         |
| Subcortical atherosclerotic dementia                                                          | 3964661000006114 | 90099008         | 1235536019       |
| Dementia associated with acquired immunodeficiency syndrome                                   | 6973471000006115 | 421529006        | 2970885015       |
| CLBD - Cortical Lewy body disease                                                             | 3802681000006115 | 80098002         | 1234440016       |
| [X]Lewy body dementia                                                                         | 299641000000112  | 80098002         | 132893017        |
| Mental & behav dis due to tobacco: resid & late-onset psychot dis, dementia                   | 1974931000006114 | 1974931000006105 | 1974931000006114 |
| Mental & behav dis due to use alcohol: resid & late-onset psychot dis, dementia               | 1975591000006119 | 1975591000006103 | 1975591000006119 |
| Dementia associated with Parkinson's Disease                                                  | 7043651000006119 | 425390006        | 2645368017       |
| Organic dementia                                                                              | 3350441000006115 | 52448006         | 2970981011       |
| Senile/presenile dementia                                                                     | 148381000006115  | 52448006         | 87274019         |
| Senile and presenile dementias                                                                | 882191000006119  | 268612007        | 882191000006119  |
| Jakob-Creutzfeldt disease                                                                     | 2386018          | 792004           | 2386018          |
| Pick's disease                                                                                | 22408016         | 13092008         | 22408016         |
| [X]Delirium superimposed on dementia                                                          | 295714013        | 2776000          | 5694012          |
| Dementia due to Pick disease                                                                  | 8009531000006112 | 21921000119103   | 2987352013       |
| Primary degenerative dementia of the Alzheimer type, presenile onset                          | 6897211000006117 | 416780008        | 2549310013       |
| [RFC] Alzheimer's disease                                                                     | 905791000006115  | 905791000006104  | 905791000006115  |
| Presenile dementia with depression                                                            | 294642013        | 191455000        | 294642013        |
| Senile dementia with depressive or paranoid features                                          | 294644014        | 191457008        | 294644014        |
| Senile dementia with paranoia                                                                 | 294645010        | 191458003        | 294645010        |
| Dementia in Alzheimer's disease with late onset, other symptoms, predominantly hallucinatory  | 1972191000006116 | 1972191000006100 | 1972191000006116 |

|                                                                                            |                  |                  |                  |
|--------------------------------------------------------------------------------------------|------------------|------------------|------------------|
| Vascular dementia of acute onset, other symptoms, predominantly depressive                 | 1972541000006119 | 1972541000006103 | 1972541000006119 |
| Multi-infarct dementia, without additional symptoms                                        | 1972601000006115 | 1972601000006104 | 1972601000006115 |
| Subcortical vascular dementia, other mixed symptoms                                        | 1972791000006115 | 1972791000006104 | 1972791000006115 |
| Mixed cortical and subcortical vascular dementia, without additional symptoms              | 1972821000006112 | 1972821000006108 | 1972821000006112 |
| Mental and behav dis due to vol solvents: resid & late-onset psychotic dis, dementia       | 1973171000006112 | 1973171000006108 | 1973171000006112 |
| Other vascular dementia, other symptoms, predominantly hallucinatory                       | 1973341000006118 | 1973341000006102 | 1973341000006118 |
| Vascular dementia, unspecified, without additional symptoms                                | 1973461000006113 | 1973461000006109 | 1973461000006113 |
| Vascular dementia, unspecified, other symptoms, predominantly hallucinatory                | 1973531000006117 | 1973531000006101 | 1973531000006117 |
| SD - Senile dementia                                                                       | 2748441000006111 | 15662003         | 1221222011       |
| [X]Other vascular dementia                                                                 | 295680015        | 429998004        | 2770951017       |
| [X]Other Alzheimer's disease                                                               | 299325013        | 26929004         | 45046017         |
| [X] Presenile dementia NOS                                                                 | 359081000006118  | 12348006         | 21256010         |
| [X]Arteriosclerotic dementia                                                               | 363791000006112  | 56267009         | 497559016        |
| [X]Dementia in Alzheimer's dis, atypical or mixed type                                     | 295671015        | 26929004         | 45046017         |
| Dementia in Alzheimer's disease, unspecified, other symptoms, predominantly delusional     | 1972401000006117 | 1972401000006101 | 1972401000006117 |
| Dementia in Alzheimer's disease, unspecified, other symptoms, predominantly hallucinatory  | 1972421000006110 | 1972421000006106 | 1972421000006110 |
| Multi-infarct dementia, other symptoms, predominantly hallucinatory                        | 1972641000006118 | 1972641000006102 | 1972641000006118 |
| Multi-infarct dementia, other mixed symptoms                                               | 1972681000006112 | 1972681000006108 | 1972681000006112 |
| Vascular dementia, unspecified, other symptoms, predominantly depressive                   | 1973551000006112 | 1973551000006108 | 1973551000006112 |
| Vascular dementia, unspecified, other mixed symptoms                                       | 1976831000006111 | 1976831000006107 | 1976831000006111 |
| Arteriosclerotic dementia                                                                  | 497559016        | 56267009         | 497559016        |
| Dementia due to Huntington disease                                                         | 7263011000006112 | 442344002        | 2820375012       |
| Dementia in Alzheimer's disease - type 1                                                   | 6900241000006112 | 416975007        | 2957155010       |
| Unspecified dementia, other symptoms, predominantly depressive                             | 1972071000006118 | 1972071000006102 | 1972071000006118 |
| Dementia in Alzheimer's disease with late onset, without additional symptoms               | 1972171000006117 | 1972171000006101 | 1972171000006117 |
| Dementia in Alzheimer's disease, unspecified, other symptoms, predominantly depressive     | 1972451000006118 | 1972451000006102 | 1972451000006118 |
| Vascular dementia of acute onset, other mixed symptoms                                     | 1972571000006110 | 1972571000006106 | 1972571000006110 |
| Subcortical vascular dementia, other symptoms, predominantly hallucinatory                 | 1972751000006114 | 1972751000006105 | 1972751000006114 |
| Mixed cortical and subcortical vascular dementia, other symptoms, predominantly delusional | 1972831000006110 | 1972831000006106 | 1972831000006110 |
| Mixed cortical and subcortical vascular dementia, other mixed symptoms                     | 1972931000006117 | 1972931000006101 | 1972931000006117 |
| Vascular dementia, unspecified, other symptoms, predominantly delusional                   | 1973501000006113 | 1973501000006109 | 1973501000006113 |
| Mental and behav dis mlti drg use/oth psych subs: resid/late psychot dis, dementia         | 1974271000006119 | 1974271000006103 | 1974271000006119 |
| Dementia confirmed                                                                         | 1823871000006112 | 1823871000006108 | 1823871000006112 |
| AIDS - Acquired immune deficiency syndrome dementia complex                                | 6973441000006111 | 421529006        | 2622765017       |

|                                                      |                  |           |                 |
|------------------------------------------------------|------------------|-----------|-----------------|
| Alcohol-induced persisting dementia                  | 2502981000006117 | 281004    | 1558011         |
| Acquired immune deficiency syndrome-related dementia | 6973431000006118 | 421529006 | 2622764018      |
| Dementia paralytica                                  | 3341641000006113 | 51928006  | 86446018        |
| SDAT - Senile dementia, Alzheimer's type             | 6900221000006117 | 416975007 | 2957134013      |
| [X]Mixed cortical and subcortical vascular dementia  | 398571000006112  | 230287006 | 345112018       |
| [X]Alcoholic dementia NOS                            | 362941000006113  | 281004    | 1225776018      |
| Dementia of the Lewy body type                       | 3802651000006111 | 80098002  | 1234437016      |
| [X]Subcortical vascular dementia                     | 428201000006119  | 230286002 | 345111013       |
| Cortical Lewy body disease                           | 3802671000006118 | 80098002  | 1234439018      |
| Paralytic dementia                                   | 3341701000006116 | 51928006  | 1231057014      |
| [X]Multi-infarct dementia                            | 399031000006111  | 56267009  | 93568017        |
| Other alcoholic dementia                             | 401760017        | 281004    | 1225776018      |
| Senile dementia - simple type                        | 882201000006116  | 191449005 | 882201000006116 |
| Presenile dementia with paranoia                     | 294641018        | 191454001 | 294641018       |
| Dementia in conditions EC                            | 294718018        | 191519005 | 294718018       |

## Chapter 2. Code lists for trial outcomes

**Table S24. Cardiovascular mortality HES (ICD10) codes**

| ICD10 codes                    | Term                                                          |
|--------------------------------|---------------------------------------------------------------|
| I00-I02                        | Acute rheumatic fever                                         |
| I05-I09                        | Chronic rheumatic heart diseases                              |
| I10-I15                        | Hypertensive diseases                                         |
| I20-I25                        | Ischaemic heart diseases                                      |
| I26-I28                        | Pulmonary heart disease and diseases of pulmonary circulation |
| I30-I52                        | Other forms of heart disease                                  |
| I60-I69                        | Cerebrovascular diseases                                      |
| I70-I78 (exclude I78.0, I78.1) | Diseases of arteries, arterioles and capillaries              |
| G46                            | Vascular syndromes of brain in cerebrovascular diseases       |
| G45                            | Transient cerebral ischaemic attacks and related syndromes    |
| R57.0                          | Cardiogenic shock                                             |
| K76.1                          | Chronic passive congestion of liver                           |
| J81                            | Pulmonary oedema                                              |

**Table S25. Ischaemic stroke Aurum codes**

| Term                                                                     | Medcode ID        | SNOMED CT Concept ID | SNOMED CT Description ID |
|--------------------------------------------------------------------------|-------------------|----------------------|--------------------------|
| [X]Other cerebral infarction                                             | 300941014         | 432504007            | 2770034014               |
| Multiple lacunar infarcts                                                | 5967391000006111  | 307363008            | 450609012                |
| Stroke due to basilar artery thrombus                                    | 3508956015        | 329641000119104      | 3508956015               |
| Cerebrovascular accident due to thrombus of right middle cerebral artery | 3508961018        | 16002031000119102    | 3508961018               |
| Total anterior cerebral circulation stroke                               | 5011071000006114  | 230694003            | 345642016                |
| [RFC] Stroke/CVA                                                         | 907581000006119   | 907581000006103      | 907581000006119          |
| H/O: stroke                                                              | 2476091017        | 275526006            | 2476091017               |
| Right sided CVA                                                          | 300371014         | 195217004            | 300371014                |
| Brain stem infarct                                                       | 4057031000006117  | 95457000             | 158114011                |
| History of stroke in last year                                           | 5974521000006116  | 308067002            | 2986393012               |
| Left sided cerebral hemisphere cerebrovascular accident                  | 4778181000006119  | 195216008            | 300369014                |
| Stroke due to thrombus of right middle cerebral artery                   | 3508962013        | 16002031000119102    | 3508962013               |
| Cerebral infarction due to embolism of precerebral arteries              | 300313017         | 195186005            | 300313017                |
| PACI - Partial anterior cerebral circulation infarction                  | 5011101000006116  | 230695002            | 345646018                |
| Cerebellar stroke                                                        | 9912271000006112  | 16371781000119100    | 3320493016               |
| Cerebellar infarction                                                    | 158118014         | 95460007             | 158118014                |
| TACS - Total anterior cerebral circulation stroke                        | 5011081000006112  | 230694003            | 345643014                |
| Infarction of brain stem                                                 | 4057051000006112  | 95457000             | 2966602014               |
| Total anterior cerebral circulation infarction                           | 5011051000006116  | 230694003            | 345644015                |
| Cerebrovascular accident                                                 | 405339016         | 230690007            | 345637012                |
| History of cerebrovascular accident                                      | 809421000006116   | 275526006            | 2986886017               |
| CVA unspecified                                                          | 605501000006117   | 230690007            | 345637012                |
| Posterior cerebral circulation stroke                                    | 5011141000006119  | 230696001            | 2966565019               |
| Thalamic stroke                                                          | 7071911000006114  | 427296003            | 2966596011               |
| Partial anterior cerebral circulation stroke                             | 5011111000006118  | 230695002            | 345647010                |
| Right sided cerebral infarction                                          | 451134017         | 307767006            | 451134017                |
| Left sided cerebral infarction                                           | 451133011         | 307766002            | 451133011                |
| Multi-infarct state                                                      | 5011261000006110  | 230704000            | 345662012                |
| Thalamic infarction                                                      | 7071901000006111  | 427296003            | 2674127019               |
| Choroidal infarct                                                        | 6041261000006115  | 314003000            | 458273015                |
| LI - Lacunar infarction                                                  | 5011181000006113  | 230698000            | 345654016                |
| [RFC] Stroke                                                             | 907591000006116   | 907591000006100      | 907591000006116          |
| [V]Personal history of stroke                                            | 1227591017        | 275526006            | 2476091017               |
| [X]Cerebrl infarctn due/unspcf occlusn or sten/cerebrl artr              | 370701000006118   | 20059004             | 33759015                 |
| Cerebral infarct due to thrombosis of precerebral arteries               | 300312010         | 195185009            | 300312010                |
| Cerebral infarction NOS                                                  | 12727431000006119 | 682621000000105      | 1495311000000117         |
| Lacunar stroke                                                           | 5011161000006115  | 230698000            | 345652017                |

|                                                                 |                  |                   |                  |
|-----------------------------------------------------------------|------------------|-------------------|------------------|
| Cerebral infarction due to occlusion of precerebral artery      | 542261000006114  | 125081000119106   | 3042974014       |
| Cerebral infarction due to thrombosis of cerebral arteries      | 300321011        | 195189003         | 300321011        |
| Cerebral ischaemic stroke due to small artery occlusion         | 7855631000006111 | 724424009         | 3438036013       |
| Haemorrhagic cerebral infarction                                | 5011291000006119 | 230706003         | 345667018        |
| Cerebral infarction due to stenosis of cerebral artery          | 2729571000000119 | 1089421000000105  | 2729571000000119 |
| Left sided CVA                                                  | 300370010        | 195216008         | 300370010        |
| Stroke due to thrombus of left middle cerebral artery           | 3508965010       | 16002111000119106 | 3508965010       |
| Cerebral infarction due to embolism of cerebral arteries        | 300322016        | 195190007         | 300322016        |
| Posterior cerebral circulation infarction                       | 5011131000006112 | 230696001         | 345649013        |
| Stroke                                                          | 884531000006117  | 685631000000102   | 884531000006117  |
| [RFC] CVA                                                       | 909171000006115  | 909171000006104   | 909171000006115  |
| Brainstem infarction NOS                                        | 345650013        | 95457000          | 158113017        |
| Lacunar infarction                                              | 299342019        | 230698000         | 345651012        |
| Sequelae of stroke,not specfd as h'morrhage or infarction       | 149571000006118  | 195239002         | 300403014        |
| Infarction of basal ganglia                                     | 2474651019       | 413102000         | 2474651019       |
| Brain stem infarction                                           | 524541000006117  | 95457000          | 158113017        |
| [V]Personal history of cerebrovascular accident (CVA)           | 1227592012       | 266995000         | 397829016        |
| Occipital cerebral infarction                                   | 5582311000006110 | 276219001         | 412270012        |
| Anterior circulation stroke of uncertain pathology              | 5011461000006111 | 230714009         | 345681016        |
| Occlusive stroke                                                | 1212072018       | 373606000         | 1212072018       |
| Stroke of uncertain pathology                                   | 5011451000006114 | 230713003         | 345680015        |
| Cerebral infarction                                             | 395780010        | 432504007         | 2770034014       |
| PACS - Partial anterior cerebral circulation stroke             | 5011121000006114 | 230695002         | 345648017        |
| Cerebrovascular accident due to cerebral artery occlusion       | 5011021000006113 | 230691006         | 2914970017       |
| Cerebral infarction with haemorrhagic transformation            | 1573101000006112 | 1573101000006108  | 1573101000006112 |
| [X]Sequelae of stroke,not specfd as h'morrhage or infarction    | 426321000006116  | 195239002         | 300403014        |
| CVA - Cerebrovascular accident                                  | 605491000006113  | 230690007         | 345635016        |
| Stroke/CVA - undefined                                          | 884521000006115  | 685631000000102   | 884521000006115  |
| Anterior cerebral circulation haemorrhagic infarction           | 5011331000006114 | 230707007         | 345668011        |
| H/O: CVA                                                        | 411518010        | 275526006         | 411518010        |
| Cerebral infarction due to thrombosis of middle cerebral artery | 7599001000006116 | 705130002         | 3023374015       |
| Ischemic stroke                                                 | 6990991000006112 | 422504002         | 2644233012       |
| Stroke unspecified                                              | 122401000006115  | 230690007         | 345637012        |
| Partial anterior cerebral circulation infarction                | 5011091000006110 | 230695002         | 345645019        |
| Basal ganglion stroke                                           | 6837051000006119 | 413102000         | 2966612019       |
| LACI - Lacunar infarction                                       | 5011171000006110 | 230698000         | 345653010        |
| Brainstem stroke syndrome                                       | 524511000006116  | 195212005         | 300365015        |
| Right sided cerebral hemisphere cerebrovascular accident        | 4778201000006118 | 195217004         | 300372019        |

|                                                                 |                   |                  |                  |
|-----------------------------------------------------------------|-------------------|------------------|------------------|
| Infarction - cerebral                                           | 218511000000117   | 432504007        | 2770034014       |
| Stroke and TIA                                                  | 8221321000006118  | 720191000000104  | 1574361000000119 |
| Sequela of ischaemic cerebral infarction                        | 8011371000006117  | 23671000119107   | 2967516015       |
| Cerebral infarction due to occlusion of cerebral artery         | 2729551000000111  | 1089411000000104 | 2729551000000111 |
| Cerebral infarction due to embolism of middle cerebral artery   | 7598981000006119  | 705128004        | 3023367013       |
| Infarction - precerebral                                        | 345639010         | 230692004        | 345639010        |
| Stroke and cerebrovascular accident unspecified                 | 12727691000006117 | 685631000000102  | 1501361000000113 |
| H/O: Stroke in last year                                        | 451371010         | 308067002        | 451371010        |
| Cerebrovascular accident due to occlusion of cerebral artery    | 11878511000006113 | 230691006        | 3636108019       |
| CVA - cerebrovascular accident due to cerebral artery occlusion | 605461000006117   | 230691006        | 345638019        |
| [X]Cereb infarct due unsp occlus/stenos precerebr arteries      | 370661000006114   | 125081000119106  | 3042974014       |
| Stroke due to cerebral arterial occlusion                       | 122361000006113   | 230691006        | 345638019        |
| Stroke                                                          | 5010981000006119  | 230690007        | 345636015        |
| Left hemispheric cerebellar artery embolism with stroke         | 3509817019        | 329461000119102  | 3509817019       |
| Posterior circulation stroke of uncertain pathology             | 5011471000006116  | 230715005        | 345682011        |
| Ischaemic stroke                                                | 6990981000006114  | 422504002        | 2644234018       |
| Anterior cerebral circulation infarction                        | 5011041000006118  | 230693009        | 345640012        |
| TACI - Total anterior cerebral circulation infarction           | 5011061000006119  | 230694003        | 345641011        |
| Sequelae of cerebral infarction                                 | 300411016         | 195243003        | 300411016        |
| Embolic stroke                                                  | 6348301000006119  | 371041009        | 1209751018       |
| Brain stem stroke                                               | 4057041000006110  | 95457000         | 2966556014       |
| Cause of Death- Cerebral Infarct                                | 1576261000006112  | 1576261000006108 | 1576261000006112 |
| [RFC] Stroke                                                    | 908801000006114   | 908801000006105  | 908801000006114  |
| Cerebrl infarctn due/unspcf occlusn or sten/cerebrl artrs       | 543141000006110   | 20059004         | 33759015         |
| Sequela of ischemic cerebral infarction                         | 8011381000006119  | 23671000119107   | 2967553014       |

**Table S26. Ischaemic stroke HES (ICD10) codes**

| ICD10 codes | Term                                                                                 |
|-------------|--------------------------------------------------------------------------------------|
| I63.0       | Cerebral infarction due to thrombosis of precerebral arteries                        |
| I63.1       | Cerebral infarction due to embolism of precerebral arteries                          |
| I63.2       | Cerebral infarction due to unspecified occlusion or stenosis of precerebral arteries |
| I63.3       | Cerebral infarction due to thrombosis of cerebral arteries                           |
| I63.4       | Cerebral infarction due to embolism of cerebral arteries                             |
| I63.5       | Cerebral infarction due to unspecified occlusion or stenosis of cerebral arteries    |
| I63.6       | Cerebral infarction due to cerebral venous thrombosis, nonpyogenic                   |
| I63.8       | Other cerebral infarction                                                            |
| I63.9       | Cerebral infarction, unspecified                                                     |
| I64         | Stroke, not specified as haemorrhage or infarction                                   |



**Table S27. Transient ischaemic attack outcome Aurum codes**

| Term                                                                              | Medcode ID        | SNOMED CT Concept ID | SNOMED CT Description ID |
|-----------------------------------------------------------------------------------|-------------------|----------------------|--------------------------|
| Intermittent cerebral ischaemia                                                   | 300353019         | 195206000            | 300353019                |
| Anterior cerebral artery syndrome                                                 | 300363010         | 195210002            | 300363010                |
| Anterior circulation transient ischaemic attack                                   | 5011491000006115  | 230716006            | 345683018                |
| Transient cerebral ischemia                                                       | 11920121000006117 | 266257000            | 395785017                |
| Personal history of transient ischaemic attack                                    | 8231151000006110  | 751371000000107      | 1653121000000119         |
| Generalised ischaemic cerebrovascular disease NOS                                 | 300379011         | 302909007            | 444905019                |
| Insufficiency - basilar artery                                                    | 499739014         | 64009001             | 499739014                |
| [V]Personal history of transient ischaemic attack                                 | 1667741000000110  | 751371000000107      | 1667741000000110         |
| Vertebral artery syndrome                                                         | 58046010          | 34781003             | 58046010                 |
| Chronic cerebral ischaemia                                                        | 360778011         | 111298007            | 360778011                |
| Basilar artery syndrome                                                           | 106392017         | 64009001             | 106392017                |
| Vertebrobasilar insufficiency                                                     | 106394016         | 64009001             | 106394016                |
| Transient ischaemic attack                                                        | 395783012         | 266257000            | 395783012                |
| Transient cerebral ischaemia                                                      | 395788015         | 266257000            | 395788015                |
| Other transient cerebral ischaemia                                                | 300348012         | 266257000            | 395788015                |
| [X]Other transnt cerebral ischaemic attacks+related syndroms                      | 416991000006112   | 266257000            | 395788015                |
| Carotid territory transient ischaemic attack                                      | 345684012         | 230716006            | 345684012                |
| Vertebrobasilar territory transient ischaemic attack                              | 5011521000006118  | 230717002            | 345689019                |
| Posterior cerebral artery syndrome                                                | 300364016         | 195211003            | 300364016                |
| Occlusion and stenosis of cerebral arteries, not resulting in cerebral infarction | 267321000006114   | 195231004            | 300394010                |
| History of transient ischemic attack                                              | 4540591000006113  | 161511000            | 2986735018               |
| Impending cerebral ischaemia                                                      | 300352012         | 195205001            | 300352012                |
| AF - Amaurosis fugax                                                              | 3930471000006118  | 88032003             | 507856014                |
| Transient cerebral ischaemia NOS                                                  | 12733221000006110 | 584181000000100      | 1296321000000119         |
| Transient Ischaemic Attacks                                                       | 884511000006111   | 584181000000100      | 884511000006111          |
| Transient cerebral ischaemia NOS                                                  | 95931000006111    | 266257000            | 395788015                |
| AFx - Amaurosis fugax                                                             | 3930481000006115  | 88032003             | 507857017                |
| Transient cerebral ischaemia NOS                                                  | 300349016         | 266257000            | 395788015                |
| Middle cerebral artery syndrome                                                   | 300362017         | 195209007            | 300362017                |
| Amaurosis fugax                                                                   | 145925010         | 88032003             | 145925010                |
| Posterior circulation transient ischemic attack                                   | 5011541000006113  | 230717002            | 345688010                |
| Amaurosis fugax of right eye                                                      | 9478331000006110  | 12237951000119105    | 3326553010               |
| Vertebro-basilar insufficiency                                                    | 67511000006117    | 64009001             | 106394016                |
| Carotid territory transient ischemic attack                                       | 5011511000006114  | 230716006            | 345686014                |
| Anterior circulation transient ischemic attack                                    | 5011501000006111  | 230716006            | 345685013                |
| Vertebrobasilar arterial insufficiency                                            | 3540781000006117  | 64009001             | 106393010                |
| Suspected transient ischaemic attack                                              | 1704681000000110  | 473129008            | 2955917017               |
| Amaurosis fugax (one sided temporary vision loss)                                 | 3930501000006113  | 88032003             | 2966609017               |
| Suspected transient ischemic attack                                               | 7483201000006116  | 473129008            | 2955838012               |

|                                  |                  |           |                 |
|----------------------------------|------------------|-----------|-----------------|
| Amaurosis                        | 3645721000006118 | 70449006  | 117033019       |
| H/O: TIA                         | 251692018        | 161511000 | 251692018       |
| Vertebro-basilar artery syndrome | 67501000006115   | 195199008 | 300343015       |
| Transient Ischaemic Attacks      | 988951000006117  | 266257000 | 988951000006117 |
| TIA - Transient ischaemic attack | 5492201000006111 | 266257000 | 395784018       |

**Table S28. Transient ischaemic attack HES (ICD10) codes**

| ICD10 codes | Term                                                                  |
|-------------|-----------------------------------------------------------------------|
| G45.2       | Multiple and bilateral precerebral artery syndromes                   |
| G45.3       | Amaurosis fugax                                                       |
| G45.8       | Other transient cerebral ischaemic attacks and related syndromes      |
| G45.9       | Transient cerebral ischaemic attack, unspecified                      |
| G46.0       | Middle cerebral artery syndrome                                       |
| G46.1       | Anterior cerebral artery syndrome                                     |
| G46.2       | Posterior cerebral artery syndrome                                    |
| G46.3       | Brain stem stroke syndrome                                            |
| G46.4       | Cerebellar stroke syndrome                                            |
| G46.5       | Pure motor lacunar syndrome                                           |
| G46.6       | Pure sensory lacunar syndrome                                         |
| G46.7       | Other lacunar syndromes                                               |
| G46.8       | Other vascular syndromes of brain in cerebrovascular diseases         |
| I65.0       | Occlusion and stenosis of vertebral artery                            |
| I65.1       | Occlusion and stenosis of basilar artery                              |
| I65.2       | Occlusion and stenosis of carotid artery                              |
| I65.3       | Occlusion and stenosis of multiple and bilateral precerebral arteries |
| I65.8       | Occlusion and stenosis of other precerebral artery                    |
| I65.9       | Occlusion and stenosis of unspecified precerebral artery              |
| I66.0       | Occlusion and stenosis of middle cerebral artery                      |
| I66.1       | Occlusion and stenosis of anterior cerebral artery                    |
| I66.2       | Occlusion and stenosis of posterior cerebral artery                   |
| I66.3       | Occlusion and stenosis of cerebellar arteries                         |
| I66.4       | Occlusion and stenosis of multiple and bilateral cerebral arteries    |
| I66.8       | Occlusion and stenosis of other cerebral artery                       |
| I66.9       | Occlusion and stenosis of unspecified cerebral artery                 |
| I67.2       | Cerebral atherosclerosis                                              |
| I67.9       | Cerebrovascular disease, unspecified                                  |

**Table S29. Venous thromboembolism and pulmonary embolism AURUM codes**

| Term                                                       | Medcode ID       | SNOMED CT Concept ID | SNOMED CT Description ID |
|------------------------------------------------------------|------------------|----------------------|--------------------------|
| Embolism and/or thrombosis of the internal iliac artery    | 300554012        | 734298005            | 3503835018               |
| CRVT - Central retinal vein thrombosis                     | 3614311000006116 | 68478007             | 501026011                |
| H/O: Deep vein thrombosis                                  | 4540531000006114 | 161508001            | 4540531000006114         |
| Thrombosis transverse sinus                                | 296939018        | 192761004            | 296939018                |
| Coronary thrombosis not resulting in myocardial infarction | 299742017        | 194821006            | 299742017                |
| Embolism and thrombosis of the brachial artery             | 300535012        | 195319003            | 300535012                |
| Embolism and thrombosis of the posterior tibial artery     | 300543019        | 195327007            | 300543019                |
| Mesenteric embolus                                         | 412653014        | 276500007            | 412653014                |
| Ischaemic foot                                             | 443199013        | 301755001            | 443199013                |
| Open removal of cardiac thrombus                           | 2675367019       | 426067000            | 2675367019               |
| Percutaneous transluminal thrombolysis of artery           | 2675878019       | 426485003            | 2675878019               |
| Open thrombectomy of renal vein                            | 2675885015       | 426937008            | 2675885015               |
| Ischaemic disease of gut                                   | 3836741000006113 | 82196007             | 504940010                |
| Acute intestinal ischaemic syndrome                        | 3986491000006113 | 91489000             | 509476019                |
| Recurrent pulmonary embolism                               | 632111000000118  | 438773007            | 2793990014               |
| Intestinal ischaemia                                       | 3836721000006118 | 82196007             | 504938017                |
| Embolism and thrombosis of the celiac artery               | 4778981000006116 | 195342005            | 300560012                |
| Ischaemia reperfusion injury of liver                      | 7821701000006113 | 721715000            | 3325835015               |
| AMI - Acute mesenteric ischaemia                           | 3986481000006110 | 91489000             | 509475015                |
| Deep venous thrombosis of lower extremity                  | 6694741000006111 | 404223003            | 2156120013               |
| Inner retinal ischaemic spots                              | 3140891000006117 | 39832008             | 2620723015               |
| Thrombosis of renal artery bypass graft                    | 449993015        | 306857000            | 449993015                |
| Ischaemic toe                                              | 450665015        | 307408003            | 450665015                |
| Mesenteric thrombus and/or embolus                         | 450682018        | 307420006            | 450682018                |
| Thrombosed haemorrhoid incised                             | 5727361000006116 | 287799004            | 2871742013               |
| Infarct of liver                                           | 2783881000006119 | 17890003             | 30227010                 |
| TL - Transluminal pulmonary embolectomy                    | 4666351000006113 | 175268008            | 271403011                |
| Ischaemic bowel disease                                    | 3836731000006115 | 82196007             | 504939013                |
| Thrombosis of central nervous system venous sinus NOS      | 296940016        | 192759008            | 296937016                |
| Sagittal sinus thrombosis                                  | 3648391000006110 | 70607008             | 501619010                |
| History of recurrent deep vein thrombosis                  | 8044851000006112 | 141911000119100      | 3043613018               |
| Thrombosed external haemorrhoid                            | 2922231000006111 | 26373009             | 483208017                |
| Venous thromboembolic disease                              | 7098321000006117 | 429098002            | 2695294011               |
| Deep venous thrombosis - leg                               | 989221000006110  | 404223003            | 989221000006110          |
| Cerebral venous thrombosis of lateral sinus                | 2838001000006118 | 21258007             | 1222620011               |
| Ischaemic optic neuropathy                                 | 476238012        | 14357004             | 476238012                |
| Pulmonary embolus                                          | 193601000006115  | 59282003             | 98484016                 |
| Mesenteric thrombosis                                      | 215511000000110  | 95446005             | 158099015                |

|                                                            |                  |                 |                  |
|------------------------------------------------------------|------------------|-----------------|------------------|
| Post radiological embolism of upper limb artery            | 216711000006118  | 312377009       | 456079019        |
| Thrombosis of cavernous venous sinus                       | 3962581000006110 | 89980009        | 149150017        |
| Unprovoked deep vein thrombosis                            | 2488341000000112 | 978421000000101 | 2488341000000112 |
| Ischaemic arm                                              | 5058031000006112 | 233959009       | 350538016        |
| Thrombosis of transverse sinus                             | 2837991000006111 | 21258007        | 35719015         |
| Pulmonary arterial thrombosis                              | 3439711000006111 | 57834008        | 96166019         |
| Male genital thrombosis NOS                                | 304536019        | 198057005       | 304524013        |
| Ischaemic necrosis                                         | 3901731000006110 | 86217007        | 142974016        |
| Vascular graft embolus                                     | 5925451000006112 | 304090004       | 446358019        |
| Deep venous thrombosis of leg                              | 6694761000006110 | 404223003       | 2162420015       |
| Superior mesenteric artery embolus                         | 4785631000006110 | 196999001       | 302978019        |
| Embolus of central nervous system venous sinus             | 639231000006117  | 14246007        | 1221072019       |
| Acute ischaemic colitis                                    | 503091015        | 75700000        | 503091015        |
| Thyroid infarction                                         | 1220407012       | 11859008        | 1220407012       |
| Embolism of central nervous system venous sinus            | 1221072019       | 14246007        | 1221072019       |
| Capillary thrombosis                                       | 30091013         | 17810004        | 30091013         |
| Acute infarction of papillary muscle                       | 2663441000006117 | 10273003        | 17900011         |
| Removal of vessel clot                                     | 866201000006119  | 392031002       | 866201000006119  |
| Acute deep venous thrombosis of internal jugular vein      | 8042511000006119 | 135001000119100 | 2971631010       |
| PVT - Portal vein thrombosis                               | 2784351000006119 | 17920008        | 1221613018       |
| Arteritic ischaemic optic neuropathy                       | 5008941000006114 | 230508004       | 345412011        |
| Peripheral ischaemic vascular disease                      | 350535018        | 233958001       | 350535018        |
| Upper limb ischaemia                                       | 350540014        | 233959009       | 350540014        |
| Trendelenburg pulmonary embolectomy                        | 271392011        | 175262009       | 271392011        |
| Open embolectomy of bifurcation of aorta                   | 271509013        | 175348000       | 271509013        |
| Open embolectomy of carotid artery                         | 271540018        | 175374006       | 271540018        |
| Open embolectomy of axillary artery                        | 271639012        | 175446000       | 271639012        |
| Percutaneous transluminal embolectomy of subclavian artery | 271654018        | 175456001       | 271654018        |
| Percutaneous transluminal embolectomy of brachial artery   | 271656016        | 175457005       | 271656016        |
| Percutaneous transluminal embolectomy of axillary artery   | 271671017        | 175465008       | 271671017        |
| Percutaneous transluminal embolectomy of iliac artery      | 271901019        | 175613000       | 271901019        |
| Open thrombectomy of femoral artery                        | 272032018        | 175704008       | 272032018        |
| Percutaneous transluminal embolectomy of femoral artery    | 272055015        | 175717006       | 272055015        |
| Percutaneous transluminal embolectomy of popliteal artery  | 272056019        | 175718001       | 272056019        |
| Prosthetic graft thrombectomy                              | 272305017        | 175891000       | 272305017        |
| Corpus cavernosum embolism                                 | 1231107016       | 52303006        | 1231107016       |
| Vein graft thrombectomy                                    | 1233341011       | 71007004        | 1233341011       |
| Cerebral vein thrombosis                                   | 1235913017       | 95455008        | 1235913017       |
| Infarction of fallopian tube                               | 94629010         | 56900004        | 94629010         |
| Infarct of lung                                            | 3551761000006115 | 64662007        | 107460013        |

|                                                                    |                   |                  |                  |
|--------------------------------------------------------------------|-------------------|------------------|------------------|
| Cerebral arterial thrombosis                                       | 3662321000006117  | 71444005         | 118691019        |
| Ischaemic foot                                                     | 1699111000006110  | 1699111000006106 | 1699111000006110 |
| Percutaneous mechanical thromboembolectomy                         | 359731000000112   | 225291000000108  | 359731000000112  |
| Unprovoked DVT (deep vein thrombosis)                              | 8361011000006114  | 978421000000101  | 2518391000000114 |
| Carotid thromboendarterectomy                                      | 3588601000006110  | 66951008         | 111209010        |
| Saddle embolus of abdominal aorta                                  | 5058281000006118  | 233972005        | 350565011        |
| Peripheral arterial embolism                                       | 884661000006110   | 583731000000103  | 884661000006110  |
| Embolus/thrombus artery NOS                                        | 884671000006115   | 583761000000108  | 884671000006115  |
| Venous embolism NOS                                                | 884741000006117   | 587851000000108  | 884741000006117  |
| Embolism                                                           | 887751000006110   | 198850008        | 887751000006110  |
| Evacuation of thrombosed haemorrhoids                              | 3984761000006115  | 91392002         | 509429011        |
| Embolus of vein NOS                                                | 12719591000006119 | 587851000000108  | 1303841000000119 |
| Arterial embolism and thrombosis NOS                               | 12733161000006111 | 583761000000108  | 1295451000000114 |
| Cholesterol embolus syndrome                                       | 354495010         | 236489002        | 354495010        |
| Fogarty embolectomy of artery                                      | 1776773010        | 397047005        | 1776773010       |
| Thrombosis - coronary                                              | 1786198013        | 398274000        | 1786198013       |
| Central retinal vein occlusion                                     | 113737013         | 68478007         | 113737013        |
| Thrombosis of cerebral arteries                                    | 3662311000006113  | 71444005         | 118690018        |
| BRVT - Branch retinal vein thrombosis                              | 2892681000006110  | 24596005         | 481963013        |
| Thrombosed external pile                                           | 2922241000006118  | 26373009         | 483209013        |
| Thromboendarterectomy of aorta                                     | 3295821000006118  | 49187005         | 81937019         |
| PC TL embolectomy popliteal artery                                 | 4668191000006117  | 175718001        | 272057011        |
| Percutaneous transluminal thrombolysis of vein with reconstruction | 7098901000006114  | 429141007        | 2692268010       |
| Right ventricular thrombus                                         | 5989831000006113  | 309518001        | 452962013        |
| Thrombosis of testis                                               | 3605531000006118  | 67962003         | 112890010        |
| Cerebral arterial embolism                                         | 3728451000006116  | 75543006         | 125471016        |
| IRIS - Inner retinal ischaemic spots                               | 3140901000006118  | 39832008         | 2620724014       |
| Deep vein thrombosis of peroneal vein                              | 1119161000000115  | 443210003        | 1664901000000117 |
| Renal infarction                                                   | 1848131000006113  | 45456005         | 75778012         |
| [RFC] Venous thrombosis                                            | 905491000006112   | 905491000006108  | 905491000006112  |
| Ischaemic nephropathy                                              | 1160091000000115  | 710565001        | 3082872011       |
| Release of ischaemic contracture of forearm                        | 4682421000006112  | 178253006        | 275890019        |
| Open embolectomy of inferior mesenteric artery NEC                 | 271760012         | 397045002        | 1776771012       |
| Open embolectomy of suprarenal artery NEC                          | 271761011         | 397045002        | 1776771012       |
| Open embolectomy of visceral branch of abdominal aorta NEC         | 271780013         | 397045002        | 1776771012       |
| Open embolectomy of artery NEC                                     | 272097014         | 397045002        | 1776771012       |
| Open removal of thrombus from vein NOS                             | 272248014         | 175843001        | 272243017        |
| Open embolectomy of iliac artery                                   | 394332017         | 265521000        | 394332017        |
| Renal artery thrombosis                                            | 158317012         | 95579008         | 158317012        |
| Deep vein thrombosis of leg related to air travel                  | 216205019         | 134399007        | 216205019        |
| Thrombosis of lateral venous sinus                                 | 2837981000006113  | 21258007         | 35718011         |

|                                                                     |                  |                  |                  |
|---------------------------------------------------------------------|------------------|------------------|------------------|
| Percutaneous thrombolysis of vein                                   | 5593341000006115 | 276985008        | 413389019        |
| Brachial embolectomy                                                | 5048991000006113 | 233313002        | 349588014        |
| Percutaneous transluminal embolectomy of artery NEC                 | 394347014        | 397045002        | 1776771012       |
| Cerebral venous thrombosis                                          | 1729331000006116 | 1729331000006100 | 1729331000006116 |
| Embolism of corpus cavernosum                                       | 3347911000006112 | 52303006         | 87035015         |
| Chronic intestinal ischaemia                                        | 4194521000006117 | 111354009        | 361442014        |
| Deep vein thrombosis of portal vein                                 | 2784341000006116 | 17920008         | 1221612011       |
| Embolism and thrombosis of other specified artery                   | 300552011        | 266262004        | 395794011        |
| Arterial embolism and thrombosis NOS                                | 300564015        | 266262004        | 395794011        |
| Infarction of thyroid                                               | 2688811000006110 | 11859008         | 20465014         |
| Thrombosis of intracranial venous sinus                             | 4768491000006118 | 192759008        | 1784812010       |
| Thrombosis of penile vein                                           | 3745871000006116 | 76598006         | 127203016        |
| Thrombosed hemorrhoid incised                                       | 5727411000006112 | 287799004        | 2871743015       |
| Occlusive thromboarteriopathy                                       | 6206441000006110 | 359789008        | 475141015        |
| Percutaneous transluminal thrombolysis of blood vessel of liver     | 1545591000006112 | 426059008        | 2675452017       |
| Percutaneous transluminal thrombolysis and reconstruction of artery | 1548401000006112 | 428068004        | 2696045014       |
| Aortic bifurcation embolus                                          | 5058291000006115 | 233972005        | 350566012        |
| External thrombosed hemorrhoids                                     | 2922201000006115 | 26373009         | 483203014        |
| Acute colonic ischaemia                                             | 3730871000006110 | 75700000         | 2310141000000117 |
| Thrombosis of cerebral veins                                        | 4056971000006118 | 95455008         | 158110019        |
| Embolectomy                                                         | 3668011000006113 | 71815002         | 119306015        |
| Embolism and thrombosis of a leg artery NOS                         | 300547018        | 195318006        | 300534011        |
| Peripheral arterial embolism and thrombosis NOS                     | 300550015        | 195318006        | 300534011        |
| Renal artery embolism                                               | 158318019        | 95580006         | 158318019        |
| Embolectomy of popliteal artery                                     | 5049001000006113 | 233314008        | 349592019        |
| Multiple infarcts                                                   | 2947401000006115 | 27876002         | 46655014         |
| DVT - Deep vein thrombosis of lower limb                            | 6694751000006113 | 404223003        | 2162419014       |
| Infarction of kidney                                                | 3233381000006117 | 45456005         | 75780018         |
| Acute deep vein thrombosis of lower limb                            | 7966351000006118 | 651000119108     | 2967724010       |
| Superficial venous thrombosis of leg                                | 7103191000006117 | 429434005        | 2692641015       |
| Ocular ischaemic syndrome                                           | 6045981000006117 | 314436005        | 458797013        |
| Mesenteric embolism                                                 | 412652016        | 276500007        | 412652016        |
| Thrombosis of inferior vena cava                                    | 419640012        | 281595001        | 419640012        |
| Thrombosis of vein of leg                                           | 453210011        | 309735004        | 453210011        |
| Vertebrobasilar ischaemic vertigo                                   | 5034291000006111 | 232288005        | 348027016        |
| Infarction                                                          | 3403531000006115 | 55641003         | 92491010         |
| Embolism in vascular graft                                          | 446359010        | 304090004        | 446359010        |
| Thromboembolus of internal iliac artery                             | 3503835018       | 734298005        | 3503835018       |
| SMAE - Superior mesenteric artery embolus                           | 4785641000006117 | 196999001        | 302979010        |
| Thrombosis of stent of renal artery                                 | 1848121000006110 | 840961000000108  | 2182101000000113 |
| Deep venous thrombosis of the popliteal vein                        | 7078601000006114 | 427776007        | 2691844011       |

|                                                                                                           |                   |                 |                  |
|-----------------------------------------------------------------------------------------------------------|-------------------|-----------------|------------------|
| Thrombosis of vein of lower leg                                                                           | 5059271000006110  | 234043001       | 2820167012       |
| Saddle embolus of pulmonary artery                                                                        | 8106001000006111  | 328511000119109 | 3322848011       |
| Popliteal artery thrombosis                                                                               | 3918361000006110  | 87239004        | 144656012        |
| Saddle embolus                                                                                            | 3108321000006117  | 37778000        | 63025019         |
| Arterial embolism                                                                                         | 3387371000006112  | 54687002        | 90875013         |
| Brachiocephalic vein thrombosis                                                                           | 5653441000006111  | 281597009       | 419642016        |
| Stroke due to basilar artery thrombus                                                                     | 3508956015        | 329641000119104 | 3508956015       |
| Femoral embolectomy                                                                                       | 2634331000006113  | 8409001         | 1234899012       |
| Hemopericardium due to and following acute myocardial infarction                                          | 12220751000006113 | 194862000       | 3673281015       |
| Penile venous thrombosis                                                                                  | 3745891000006115  | 76598006        | 3036947013       |
| Thrombosed external haemorrhoids                                                                          | 2922181000006116  | 26373009        | 196520016        |
| Cerebral infarction due to occlusion of precerebral artery                                                | 542261000006114   | 125081000119106 | 3042974014       |
| Deep vein thrombosis                                                                                      | 2162148012        | 128053003       | 2162149016       |
| Carotid artery thrombosis                                                                                 | 100771000006112   | 86003009        | 142588012        |
| Occlusive mesenteric ischaemia                                                                            | 5086201000006115  | 235842000       | 353530010        |
| Multiple lacunar infarcts                                                                                 | 5967391000006111  | 307363008       | 450609012        |
| Venous thrombosis, phlebitis and thrombophlebitis                                                         | 6018501000006115  | 312585004       | 456332011        |
| Thyroid hemorrhage and infarction                                                                         | 4757961000006112  | 190305000       | 292442019        |
| Non-occlusive thrombus                                                                                    | 2927841000006117  | 26713004        | 44719012         |
| Open embolectomy of coeliac artery NEC                                                                    | 271757017         | 397045002       | 1776771012       |
| Multifocal infarct                                                                                        | 3474711000006110  | 60007006        | 99691019         |
| Infarction of spleen                                                                                      | 38632019          | 22996003        | 1223010014       |
| Pulmonary thromboembolism                                                                                 | 5057591000006116  | 233935004       | 350497014        |
| Thrombectomy                                                                                              | 3205401000006110  | 43810009        | 73061013         |
| Thrombosis of superior sagittal sinus                                                                     | 3648381000006112  | 70607008        | 117287016        |
| Ischaemic hepatitis                                                                                       | 5086761000006113  | 235877000       | 353591011        |
| Ischaemic gangrene                                                                                        | 6670921000006117  | 402861007       | 1773672019       |
| Suspected pulmonary embolism                                                                              | 2549664019        | 417113001       | 2549664019       |
| Pulmonary thromboendarterectomy                                                                           | 2675439010        | 426900002       | 2675439010       |
| Intracranial venous thrombosis                                                                            | 5836951000006117  | 297157005       | 437623015        |
| Thrombosis of atrium, auricular appendage, and ventricle due to and following acute myocardial infarction | 12220791000006119 | 194868001       | 3673277015       |
| Recurrent DVT (deep vein thrombosis)                                                                      | 7665071000006116  | 710167004       | 2496081000000115 |
| Lacunar infarction                                                                                        | 299342019         | 230698000       | 345651012        |
| Venous embolism                                                                                           | 300975010         | 234049002       | 350676017        |
| Embolectomy of iliac artery                                                                               | 5153821000006115  | 240928009       | 360865017        |
| Embolectomy of femoral artery                                                                             | 2634321000006110  | 8409001         | 14892019         |
| Ischaemic ulcer of toe                                                                                    | 7108391000006114  | 429768000       | 2693575017       |
| Acute deep venous thrombosis of femoral vein                                                              | 8041581000006116  | 132291000119106 | 2971883017       |
| Removal of thrombus of arteriovenous fistula                                                              | 7081801000006114  | 427992007       | 2691808018       |
| Ischemic infarction of muscle                                                                             | 5143791000006114  | 240126009       | 359749018        |



|                                                         |                   |                 |                  |
|---------------------------------------------------------|-------------------|-----------------|------------------|
| Thyroid haemorrhage or infarction NOS                   | 292445017         | 190305000       | 292443012        |
| Thromboangiitis obliterans NOS                          | 300503012         | 52403007        | 87208017         |
| Embolism and thrombosis of an arm artery NOS            | 300538014         | 195318006       | 300534011        |
| Thrombosis                                              | 7218941000006118  | 439127006       | 2794470015       |
| Clotted venous sacculae                                 | 5086421000006112  | 235854000       | 353554017        |
| Venous thrombosis                                       | 395803017         | 111293003       | 178522012        |
| Thrombosis                                              | 5477661000006119  | 264579008       | 393059012        |
| Saddle embolus                                          | 350563016         | 233972005       | 350563016        |
| Infarction of liver                                     | 2783891000006116  | 17890003        | 1221609013       |
| Provoked DVT (deep vein thrombosis)                     | 8361031000006115  | 978441000000108 | 2518461000000111 |
| Femoral artery embolus                                  | 5058301000006119  | 233973000       | 350567015        |
| Critical lower limb ischaemia                           | 5058111000006119  | 233962007       | 350547012        |
| Subclavian artery thrombosis                            | 5836921000006114  | 297154003       | 437620017        |
| Lacunar infarct                                         | 3818181000006114  | 81037000        | 134436018        |
| Ischaemia of feet                                       | 5886711000006111  | 300917007       | 442114010        |
| Embolism and/or thrombosis of the external iliac artery | 300555013         | 734299002       | 3503839012       |
| Renal infarct                                           | 3233391000006119  | 45456005        | 75781019         |
| Embolectomy of carotid artery                           | 5902211000006114  | 302053004       | 443591015        |
| Embolism of vein NOS                                    | 12759341000006113 | 587851000000108 | 1303861000000118 |
| Lower limb arterial embolus                             | 6015571000006117  | 312378004       | 456080016        |
| Embolectomy of lower limb artery                        | 3688071000006119  | 73038007        | 121315013        |
| Iliofemoral deep vein thrombosis                        | 5059301000006112  | 234044007       | 3464381018       |
| Thrombolysis of vein                                    | 5050621000006118  | 233428003       | 349770015        |
| Thrombolysis of artery                                  | 5049421000006111  | 233335005       | 349633016        |
| Thyroid haemorrhage and infarction                      | 292443012         | 190305000       | 292443012        |
| Embolism cavernous sinus                                | 296932010         | 192754003       | 296932010        |
| Embolism lateral sinus                                  | 296934011         | 192756001       | 296934011        |
| Embolism and thrombosis of an arm or leg artery         | 300534011         | 195318006       | 300534011        |
| Embolism and/or thrombosis of the common iliac artery   | 300553018         | 195335005       | 300553018        |
| Embolism and thrombosis of the splenic artery           | 300558010         | 195340002       | 300558010        |
| Thrombophlebitis of the femoral vein                    | 300672010         | 195410000       | 300672010        |
| Thrombophlebitis of the anterior tibial vein            | 300674011         | 195412008       | 300674011        |
| History of thromboembolism                              | 5497011000006116  | 266996004       | 2986452015       |
| Acute intestinal ischaemia                              | 3986461000006117  | 91489000        | 509473010        |
| History of deep vein thrombosis                         | 4540551000006119  | 161508001       | 2986938011       |
| Incision of thrombosed hemorrhoid                       | 3984721000006114  | 91392002        | 151416013        |
| Post-radiological embolism of upper limb artery         | 6015561000006112  | 312377009       | 456079019        |
| Colonic ischaemia                                       | 2992791000006113  | 30588004        | 1216341014       |
| Cerebral venous thrombosis of cavernous sinus           | 100691000006118   | 89980009        | 1235519010       |
| Cerebral venous sinus thrombosis                        | 100721000006111   | 192759008       | 296937016        |
| Superior mesenteric vein thrombosis                     | 100821000006116   | 197001004       | 302981012        |

|                                                                     |                   |                 |                  |
|---------------------------------------------------------------------|-------------------|-----------------|------------------|
| Postoperative deep vein thrombosis                                  | 216571000006116   | 213220000       | 325066018        |
| Postoperative pulmonary embolus                                     | 216591000006115   | 194883006       | 299847015        |
| Ischaemic priapism                                                  | 7252011000006114  | 441575009       | 2817057019       |
| Central retinal vein thrombosis                                     | 3614331000006110  | 68478007        | 501028012        |
| Digital arterial thrombosis                                         | 5886741000006110  | 300919005       | 442117015        |
| Cerebral infarction due to cerebral venous thrombosis, non-pyogenic | 542251000006112   | 195230003       | 300393016        |
| Percutaneous transluminal venous thrombolysis NEC                   | 358041000000114   | 276985008       | 413389019        |
| Percutaneous removal of thrombus from vein NOS                      | 359571000000118   | 276977004       | 413381016        |
| Other specified percutaneous removal of thrombus from vein          | 359771000000114   | 276977004       | 413381016        |
| Evacuation of thrombosed hemorrhoid                                 | 3984741000006119  | 91392002        | 509427013        |
| Lower limb ischaemia                                                | 5058071000006110  | 233961000       | 350544017        |
| Arterial embolus                                                    | 3387391000006113  | 54687002        | 497013010        |
| Embolism                                                            | 3402611000006115  | 55584005        | 92392016         |
| Chronic deep vein thrombosis of left iliac vein                     | 12107671000006115 | 293461000119100 | 3646306012       |
| Splenic vein thrombosis                                             | 2730141000006117  | 14534009        | 24693011         |
| Percutaneous transluminal embolectomy of bifurcation of aorta       | 232881000006113   | 175356002       | 271519019        |
| Branch retinal vein thrombosis                                      | 2892651000006119  | 24596005        | 481960011        |
| Embolus/thrombosis abd. aorta                                       | 884641000006111   | 266263009       | 884641000006111  |
| Embolus/thrombosis aorta NOS                                        | 884651000006113   | 195317001       | 884651000006113  |
| Removal of thrombus from intracranial artery                        | 2845481000006110  | 21710002        | 36433012         |
| History of thromboembolism of vein                                  | 7095381000006112  | 428904003       | 2695935017       |
| Percutaneous embolectomy of brachial artery                         | 4667301000006111  | 175457005       | 271655017        |
| Transluminal pulmonary embolectomy                                  | 4666341000006111  | 175268008       | 271402018        |
| Acute mesenteric ischaemia                                          | 457631000006114   | 91489000        | 509474016        |
| Mesenteric infarction                                               | 523601000006115   | 3558002         | 7001012          |
| Deep venous thrombosis of deep femoral vein                         | 7078581000006116  | 427775006       | 2695171017       |
| Embolism and thrombosis of other and unspec parts aorta             | 638871000006114   | 274101000       | 409861010        |
| Embolus of the superior mesenteric artery                           | 639241000006110   | 196999001       | 302978019        |
| Thrombosed external hemorrhoid                                      | 2922211000006117  | 26373009        | 483205019        |
| Pulmonary infarction                                                | 728841000006111   | 64662007        | 107459015        |
| Thrombosed internal haemorrhoids                                    | 770161000006115   | 52931009        | 198419016        |
| Percutaneous transluminal thrombectomy of blood vessel of liver     | 1545581000006114  | 428953003       | 2692834012       |
| Percutaneous transluminal venous thrombolysis with reconstruction   | 1549761000006110  | 429141007       | 1659501000000119 |
| Retinal ischaemia                                                   | 483237018         | 26468004        | 483237018        |
| Ischaemic                                                           | 5360051000006112  | 255426005       | 380631011        |
| Asymptomatic ischaemia                                              | 5056261000006112  | 233823002       | 350356015        |
| History of pulmonary embolus                                        | 4540611000006119  | 161512007       | 2986421016       |
| Central retinal vein occlusion - ischaemic                          | 6024101000006114  | 312997008       | 456819013        |
| Embolism of iliac artery                                            | 3807321000006113  | 80383008        | 133386017        |
| Fogarty embolectomy of vein                                         | 1776763013        | 397035004       | 1776763013       |

|                                                                              |                   |                 |                  |
|------------------------------------------------------------------------------|-------------------|-----------------|------------------|
| Arterial embolus and thrombosis                                              | 395795012         | 266262004       | 395795012        |
| Occlusive thrombus                                                           | 3771791000006113  | 78195007        | 129763011        |
| Pulmonary embolism with pulmonary infarction                                 | 7967281000006119  | 1001000119102   | 2967075019       |
| Non-pyogenic venous sinus thrombosis                                         | 586241000006116   | 195229008       | 300392014        |
| Arterial ischaemia                                                           | 5057951000006115  | 233957006       | 350532015        |
| Intracranial thrombectomy                                                    | 2845491000006113  | 21710002        | 36434018         |
| Deep vein thrombosis, leg                                                    | 218551000000118   | 266267005       | 395801015        |
| Deep venous thrombosis of the superior mesenteric vein                       | 4785671000006113  | 197001004       | 302982017        |
| Acute ischaemia of small intestine                                           | 8321371000006112  | 906191000000102 | 2329961000000119 |
| Rupture of chordae tendinae due to and following acute myocardial infarction | 12220781000006117 | 194866002       | 3673278013       |
| Central retinal vein occlusion - non-ischaemic                               | 6024121000006116  | 312998003       | 456822010        |
| Ischaemic finger                                                             | 5967971000006111  | 307409006       | 450668018        |
| Ischaemic ulcer                                                              | 2721231000006112  | 13954005        | 475615013        |
| Mural thrombosis                                                             | 1235655012        | 91335003        | 1235655012       |
| Ischaemic leg ulcer                                                          | 357895013         | 238793001       | 357895013        |
| Ischaemic foot ulcer                                                         | 5126451000006116  | 238794007       | 357897017        |
| Left ventricular thrombus                                                    | 748061000006117   | 309519009       | 452964014        |
| Ischaemia                                                                    | 3353921000006110  | 52674009        | 496400017        |
| Acute deep venous thrombosis                                                 | 8041571000006119  | 132281000119108 | 2968256017       |
| Embolism and thrombosis of the iliac artery unspecified                      | 300556014         | 266262004       | 395794011        |
| [X]Embolism and thrombosis of other arteries                                 | 300964011         | 266262004       | 395794011        |
| Vessel incision - embolectomy                                                | 866261000006118   | 597641000000105 | 866261000006118  |
| Venous thrombosis NOS                                                        | 884751000006115   | 690131000000103 | 884751000006115  |
| Pulmonary embolus care                                                       | 6452821000006114  | 386280004       | 1480446016       |
| Thrombosis of pelvic vein                                                    | 4056781000006117  | 95448006        | 158101010        |
| Thrombosis of superior longitudinal sinus                                    | 296938014         | 192760003       | 296938014        |
| Embolism and thrombosis of the anterior tibial artery                        | 300541017         | 195325004       | 300541017        |
| Embolism and thrombosis of the axillary artery                               | 300559019         | 195341003       | 300559019        |
| Deep venous thrombosis                                                       | 2162149016        | 128053003       | 194647015        |
| Embolectomy of subclavian artery                                             | 5888791000006119  | 301080008       | 442323018        |
| [X] Embolism from prosthetic heart valve                                     | 358931000006111   | 35688006        | 59527012         |
| Acute massive pulmonary embolism                                             | 5057621000006119  | 233936003       | 350502011        |
| Omental infarction                                                           | 3722741000006113  | 75204008        | 124899011        |
| Embolism and thrombosis of other arteries NOS                                | 300563014         | 266262004       | 395794011        |
| Acute atrial infarction                                                      | 299719012         | 194809007       | 299719012        |
| Atrial thrombosis                                                            | 300234010         | 195147006       | 300234010        |
| Embolism and thrombosis of the radial artery                                 | 300536013         | 195320009       | 300536013        |
| Embolism and thrombosis of the coeliac artery                                | 300561011         | 195342005       | 300561011        |
| Embolism and thrombosis of the vena cava                                     | 300710016         | 195437003       | 300710016        |
| History of embolism                                                          | 5574351000006111  | 275545002       | 2986809014       |
| Provoked deep vein thrombosis                                                | 2488381000000116  | 978441000000108 | 2488381000000116 |

|                                                       |                   |                 |                  |
|-------------------------------------------------------|-------------------|-----------------|------------------|
| Acute deep vein thrombosis of left iliac vein         | 12107691000006119 | 293491000119107 | 3644949016       |
| Cerebral venous thrombosis                            | 4056981000006115  | 95455008        | 158111015        |
| Arterial embolism/thrombosis                          | 884631000006118   | 266262004       | 884631000006118  |
| Thromboembolism                                       | 6348271000006116  | 371039008       | 1228915016       |
| Percutaneous aspiration thromboembolectomy            | 359871000000116   | 225361000000106 | 359871000000116  |
| Thrombectomy of arteriovenous fistula                 | 360031000000113   | 427992007       | 2694416018       |
| Ischaemic leg                                         | 742481000006118   | 233961000       | 350546015        |
| Percutaneous venous thrombectomy                      | 1549601000006119  | 276977004       | 413381016        |
| Arterial embolectomy                                  | 6580991000006118  | 397045002       | 1776771012       |
| Peripheral arterial embolism and thrombosis NOS       | 12733151000006114 | 583731000000103 | 1295391000000110 |
| Thrombosis of vein NOS                                | 12728641000006110 | 690131000000103 | 1510411000000110 |
| Embolus of vein                                       | 5059381000006115  | 234049002       | 350677014        |
| Incision of thrombosed haemorrhoid                    | 3984711000006118  | 91392002        | 201577017        |
| Thrombectomy of venous graft                          | 3654851000006117  | 71007004        | 117941017        |
| Transjugular intrahepatic thrombectomy of portal vein | 2691870012        | 429788001       | 2691870012       |
| Thrombectomy of vein                                  | 6580651000006116  | 397028007       | 1776761010       |
| Thrombus                                              | 6568121000006118  | 396339007       | 1776291018       |
| H/O: pulmonary embolus                                | 251693011         | 161512007       | 251693011        |
| Recurrent deep vein thrombosis                        | 2144741000000111  | 710167004       | 3043650017       |
| Open embolectomy of subclavian artery                 | 271633013         | 175440006       | 271633013        |
| Multi-infarct state                                   | 5011261000006110  | 230704000       | 345662012        |
| Thrombosis of renal artery                            | 4059051000006119  | 95579008        | 158316015        |
| Deep venous thrombosis of lower limb                  | 6694771000006115  | 404223003       | 2162421016       |
| Thrombosis of vein of lower limb                      | 5992311000006119  | 309735004       | 453209018        |
| Aortic thromboembolism                                | 5560171000006116  | 274101000       | 409861010        |
| Incision and evacuation of thrombosed hemorrhoid      | 5727391000006112  | 287799004       | 2547808014       |
| Femoral artery thrombosis                             | 3345371000006113  | 52156004        | 86808015         |
| Internal thrombosed piles                             | 884851000006114   | 52931009        | 884851000006114  |
| Open embolectomy of artery NEC                        | 12723621000006114 | 597641000000105 | 1324221000000116 |
| Ischaemic colitis                                     | 12705101000006115 | 30588004        | 484643015        |
| Embolism and thrombosis of the abdominal aorta        | 395796013         | 266263009       | 395796013        |
| Open embolectomy of common iliac artery               | 411214011         | 275254000       | 411214011        |
| Right ventricular thrombosis                          | 452963015         | 309518001       | 452963015        |
| H/O: embolism                                         | 411539015         | 275545002       | 411539015        |
| External thrombosed haemorrhoids                      | 483206018         | 26373009        | 483206018        |
| Infarction of ovary                                   | 6297018           | 3129009         | 6297018          |
| Renal infarction                                      | 75778012          | 45456005        | 75778012         |
| Other embolism and thrombosis                         | 300712012         | 429098002       | 2692478010       |
| Embolus of vein NOS                                   | 300714013         | 234049002       | 350676017        |
| Mesenteric embolus NOS                                | 302983010         | 276500007       | 412653014        |
| Thrombosis of external jugular vein                   | 2234411000000115  | 864211000000100 | 2234411000000115 |
| Thrombosis of artery of transplanted kidney           | 2234541000000115  | 864271000000105 | 2234541000000115 |

|                                                       |                  |                 |                  |
|-------------------------------------------------------|------------------|-----------------|------------------|
| Excision of external thrombotic haemorrhoid           | 2591991000006114 | 5796001         | 194958014        |
| Percutaneous embolectomy of popliteal artery          | 4668171000006118 | 175718001       | 272058018        |
| Chronic thromboembolic pulmonary hypertension         | 5057801000006113 | 233947005       | 2968345015       |
| Incision and evacuation of thrombosed haemorrhoid     | 5727401000006114 | 287799004       | 2547809018       |
| Critical ischaemia of foot                            | 6021731000006115 | 312822006       | 456609017        |
| Splenic infarction                                    | 2866521000006111 | 22996003        | 38632019         |
| [RFC] Deep vein thrombosis                            | 909471000006114  | 909471000006105 | 909471000006114  |
| Thrombosed haemorrhoid - incised                      | 914791000006117  | 287799004       | 427359014        |
| Thromboembolic pulmonary hypertension                 | 350517010        | 233947005       | 350517010        |
| Percutaneous transluminal embolectomy of renal artery | 271705017        | 175489001       | 271705017        |
| Open embolectomy of femoral artery                    | 272031013        | 175704008       | 272031013        |
| Open femoral embolectomy                              | 272033011        | 175704008       | 272033011        |
| Open vein thrombectomy                                | 272244011        | 175843001       | 272244011        |
| Embolism of vein NOS                                  | 1222321017       | 234049002       | 350676017        |
| [V] Personal history of pulmonary embolism            | 451479013        | 161512007       | 251693011        |
| Percutaneous thrombolysis of intracranial artery      | 5014421000006115 | 230935003       | 345980018        |
| Vertebral artery thrombosis                           | 3553621000006119 | 64775002        | 107661016        |
| Embolism of intracranial venous sinus                 | 2725621000006114 | 14246007        | 24228018         |
| Embolism superior longitudinal sinus                  | 296933017        | 192755002       | 296933017        |
| Embolism transverse sinus                             | 296935012        | 192757005       | 296935012        |
| Myelopathy due to arterial thrombosis of spinal cord  | 297138017        | 192898007       | 297138017        |
| Embolism and thrombosis of the thoracic aorta         | 300533017        | 195317001       | 300533017        |
| Embolism and thrombosis of the ulnar artery           | 300537016        | 195321008       | 300537016        |
| Embolism and thrombosis of the popliteal artery       | 300540016        | 195324000       | 300540016        |
| Other specified open removal of thrombus from vein    | 272247016        | 175843001       | 272243017        |
| Thrombosed aneurysm                                   | 4374441000006113 | 125271003       | 193761013        |
| Thrombosis of vein of transplanted kidney             | 2234621000000111 | 864311000000105 | 2234621000000111 |
| Thrombosed external hemorrhoids                       | 2922191000006118 | 26373009        | 44177012         |
| LACI - Lacunar infarction                             | 5011171000006110 | 230698000       | 345653010        |
| Portal vein thrombosis                                | 30273012         | 17920008        | 30273012         |
| Pulmonary embolism                                    | 98484016         | 59282003        | 98484016         |
| Infarction of breast                                  | 128289017        | 77296004        | 128289017        |
| Thrombotic infarction                                 | 3756351000006111 | 77255002        | 128233014        |
| Microvascular embolism of arteriole                   | 7855891000006114 | 724439005       | 3438135014       |
| Percutaneous thrombolysis of artery                   | 5593331000006113 | 276984007       | 413388010        |
| Ischaemic foot pain when walking                      | 2377911000000114 | 713674006       | 3295993015       |
| Thrombosed haemorrhoids                               | 300748014        | 75955007        | 200560013        |
| Thrombosis of mesenteric vein                         | 302984016        | 95446005        | 158099015        |
| Thromboembolism of vein                               | 300704016        | 429098002       | 2692478010       |
| Embolism central nervous system venous sinus NOS      | 296936013        | 14246007        | 24228018         |
| Embolism and thrombosis of the hepatic artery         | 300562016        | 195343000       | 3491726018       |

|                                                                  |                   |                  |                  |
|------------------------------------------------------------------|-------------------|------------------|------------------|
| Thrombotic microangiopathy NOS                                   | 300587011         | 126729006        | 135665013        |
| Embolism and thrombosis NOS                                      | 300713019         | 429098002        | 2692478010       |
| Thrombosis of internal jugular vein                              | 2234371000000119  | 864191000000104  | 2234371000000119 |
| Ischaemic foot pain at rest                                      | 2377871000000112  | 713412006        | 3289284017       |
| Hepatic infarction                                               | 30226018          | 17890003         | 30226018         |
| Thromboangiitis obliterans                                       | 87208017          | 52403007         | 87208017         |
| Cardiac rupture due to and following acute myocardial infarction | 12221301000006119 | 233847009        | 3673284011       |
| DVT - Deep vein thrombosis                                       | 4403261000006113  | 128053003        | 2162148012       |
| Thrombosis of corpus cavernosum                                  | 3215871000006116  | 44437005         | 74102013         |
| Anterior spinal artery thrombosis                                | 345723011         | 230740003        | 345723011        |
| Peripheral ischaemia                                             | 350533013         | 233958001        | 350533013        |
| Thrombosis of retinal vein                                       | 3244261000006119  | 46085004         | 76829016         |
| Nephropathy due to ischaemia                                     | 7674011000006115  | 710565001        | 3044790019       |
| Irreversible ischaemic colitis                                   | 2936461000006116  | 27241008         | 483469013        |
| Axillary vein thrombosis                                         | 851241000006115   | 851241000006104  | 851241000006115  |
| Embolus due to internal prosthetic device                        | 324950011         | 213131003        | 324950011        |
| Pulmonary infarct                                                | 499917019         | 64662007         | 499917019        |
| Thromboembolic disease                                           | 6348281000006118  | 371039008        | 1228916015       |
| Perianal venous thrombosis                                       | 2608401000000118  | 449815008        | 2608401000000118 |
| Hepatic vein thrombosis                                          | 64466019          | 82385007         | 136654014        |
| Infarct                                                          | 3403521000006118  | 55641003         | 92488010         |
| Deep vein thrombosis of lower limb                               | 2162422011        | 404223003        | 2162422011       |
| Retinal embolus                                                  | 6702781000006116  | 404667009        | 2156561018       |
| Embolism and thrombosis of hepatic artery                        | 4778991000006118  | 195343000        | 3491726018       |
| Arteriovenous fistula thrombosis                                 | 350892013         | 234205007        | 350892013        |
| Renal artery stent thrombosis                                    | 1809151000006116  | 1809151000006100 | 1809151000006116 |
| Superior mesenteric artery thrombosis                            | 100811000006112   | 197000003        | 302980013        |
| H/O: thromboembolism                                             | 217601000000119   | 266996004        | 397830014        |
| Choroidal infarct                                                | 6041261000006115  | 314003000        | 458273015        |
| Thromboembolus of external iliac artery                          | 3503839012        | 734299002        | 3503839012       |
| Acute lacunar infarction                                         | 7054171000006115  | 426107000        | 2674093010       |
| Acute infarct                                                    | 3400671000006111  | 55470003         | 92217011         |
| Acute pulmonary embolism                                         | 7609581000006110  | 706870000        | 3027244010       |
| Superficial femoral embolectomy                                  | 6019821000006117  | 312689003        | 456443016        |
| Iliac vein thrombosis                                            | 3636257010        | 762256003        | 3636257010       |
| Reason for referral: Deep Vein Thrombosis                        | 1776621000006117  | 1776621000006101 | 1776621000006117 |
| Percutaneous embolectomy of pulmonary artery                     | 4666331000006118  | 175268008        | 271401013        |
| Percutaneous embolectomy of aortoiliac segment                   | 4666711000006113  | 175356002        | 271520013        |
| Embolism and thrombosis NOS                                      | 638821000006113   | 429098002        | 2692478010       |
| Retinal vein occlusion                                           | 3244281000006112  | 46085004         | 494432015        |
| Thrombosis of vessels of cord                                    | 2962491000006118  | 28773001         | 48182014         |
| Embolectomy operation                                            | 5559451000006118  | 274021001        | 409761015        |

|                                                                             |                   |                  |                  |
|-----------------------------------------------------------------------------|-------------------|------------------|------------------|
| Thrombosis of subclavian vein                                               | 2795114019        | 438647008        | 2795114019       |
| History of thrombosis                                                       | 5574371000006118  | 275546001        | 2986432016       |
| Ischaemic nephropathy                                                       | 1757951000006119  | 1757951000006103 | 1757951000006119 |
| Arterial thrombosis                                                         | 218541000000116   | 65198009         | 108347015        |
| Thromboendarterectomy                                                       | 866221000006112   | 392031002        | 866221000006112  |
| Open thrombectomy of popliteal artery                                       | 272034017         | 175705009        | 272034017        |
| Open embolectomy popliteal artery                                           | 272035016         | 175705009        | 272035016        |
| Open thrombectomy of vein of lower limb                                     | 272246013         | 175845008        | 272246013        |
| Declotting of thigh vein loop                                               | 272283013         | 175873005        | 272283013        |
| High probability of deep vein thrombosis                                    | 1141351000000111  | 513291000000109  | 1141351000000111 |
| Arterial embolism and thrombosis                                            | 491241000006118   | 266262004        | 395795012        |
| Corpus cavernosum embolus                                                   | 1231106013        | 52303006         | 1231106013       |
| Blood clot                                                                  | 3731671000006117  | 75753009         | 125815012        |
| Retinal microembolism                                                       | 169951000006111   | 76975009         | 127782012        |
| Cerebral venous thrombosis of sigmoid sinus                                 | 5011651000006111  | 230721009        | 345698016        |
| Evacuation of thrombosed hemorrhoids                                        | 3984731000006112  | 91392002         | 151417016        |
| Thrombosed hemorrhoids                                                      | 3735111000006119  | 75955007         | 126159013        |
| PE - Pulmonary embolism                                                     | 3462921000006119  | 59282003         | 1231937012       |
| Ischaemic lower limb pain at rest                                           | 8278561000006114  | 836711000000108  | 2172511000000111 |
| H/O: thrombosis                                                             | 411540018         | 275546001        | 411540018        |
| Axillary vein thrombosis                                                    | 437622013         | 297156001        | 437622013        |
| Retinal vein thrombosis                                                     | 494431010         | 46085004         | 494431010        |
| Corpus cavernosum thrombosis                                                | 1230092014        | 44437005         | 1230092014       |
| Renal artery embolus                                                        | 1235925019        | 95580006         | 1235925019       |
| Deep venous thrombosis of peroneal vein                                     | 7273741000006119  | 443210003        | 2839752017       |
| Thrombosed hemorrhoid - incised                                             | 5727371000006111  | 287799004        | 427358018        |
| Blood clot in eye                                                           | 5233761000006119  | 246682000        | 368495017        |
| Recurrent deep vein thrombosis                                              | 1786921000006116  | 1786921000006100 | 1786921000006116 |
| Thrombosis of middle cerebral artery                                        | 7598991000006116  | 705129007        | 3023377010       |
| Haemopericardium due to and following acute myocardial infarction           | 12220761000006110 | 194862000        | 3673282010       |
| Penis vein thrombosis                                                       | 503317010         | 76598006         | 503317010        |
| Testicular thrombosis                                                       | 1232993010        | 67962003         | 1232993010       |
| H/O: Deep vein thrombosis                                                   | 451478017         | 161508001        | 2547692019       |
| [V] Personal history DVT (deep vein thrombosis)                             | 1227369013        | 161508001        | 2547692019       |
| Thrombosis lateral sinus                                                    | 100701000006118   | 21258007         | 1222620011       |
| Percutaneous transluminal thrombolysis of femoral graft using streptokinase | 238621000006112   | 309449009        | 452880015        |
| Open pulmonary embolectomy                                                  | 261021000006119   | 175262009        | 271393018        |
| Thrombosis of arteries of lower extremity                                   | 3978101000006118  | 90958004         | 150730010        |
| Deep venous thrombosis - leg                                                | 884731000006110   | 266267005        | 884731000006110  |
| External thrombosed piles                                                   | 884881000006118   | 26373009         | 884881000006118  |
| [RFC] Pulmonary embolism/pulmonary hypertension                             | 905451000006118   | 905451000006102  | 905451000006118  |

|                                                           |                  |                  |                  |
|-----------------------------------------------------------|------------------|------------------|------------------|
| [RFC] Arterial embolism of limbs                          | 905541000006119  | 905541000006103  | 905541000006119  |
| Evacuation of thrombosed haemorrhoid                      | 649671000006118  | 91392002         | 509428015        |
| Infarction of prostate                                    | 36968017         | 22035000         | 36968017         |
| Spinal cord infarct                                       | 7156221000006114 | 432249006        | 2770833019       |
| Post radiological embolism of lower limb artery           | 216701000006116  | 312380005        | 456083019        |
| Percutaneous transluminal embolectomy of pulmonary artery | 232951000006114  | 175268008        | 271401013        |
| Renal vein thrombosis                                     | 2751261000006119 | 15842009         | 26843012         |
| Ischaemic infarction of muscle                            | 359748014        | 240126009        | 359748014        |
| Arterial embolic and thrombotic occlusion                 | 395794011        | 266262004        | 395794011        |
| CRVO - Central retinal vein occlusion                     | 3614321000006112 | 68478007         | 501027019        |
| Limb ischaemia                                            | 8009281000006110 | 21631000119105   | 2923092011       |
| Open embolectomy of superior mesenteric artery NEC        | 271759019        | 397045002        | 1776771012       |
| Embolism and thrombosis of the femoral artery             | 300539018        | 195323006        | 300539018        |
| Embolism and thrombosis of the dorsalis pedis artery      | 300542012        | 195326003        | 300542012        |
| Embolism and thrombosis of the subclavian artery          | 300557017        | 195339004        | 300557017        |
| Embolism and thrombosis of the renal vein                 | 300711017        | 195438008        | 300711017        |
| Scrotal thrombosis                                        | 304527018        | 198059008        | 304527018        |
| H/O: Deep Vein Thrombosis                                 | 251689017        | 161508001        | 251689017        |
| Percutaneous embolectomy of femoral artery                | 4668151000006111 | 175717006        | 272054016        |
| Thromboembolic pulmonary hypertension                     | 1749291000006113 | 1749291000006109 | 1749291000006113 |
| Post-radiological embolism of lower limb artery           | 6015601000006112 | 312380005        | 456083019        |
| Thrombosed internal hemorrhoids                           | 3358351000006111 | 52931009         | 88072011         |
| Infarct of prostate                                       | 2850821000006117 | 22035000         | 1222704012       |
| Superficial vein thrombosis                               | 5574011000006113 | 275517008        | 411509013        |
| Open embolectomy of brachial artery                       | 271635018        | 175442003        | 271635018        |
| Open embolectomy of vertebral artery                      | 271636017        | 175443008        | 271636017        |
| Percutaneous transluminal embolectomy of vertebral artery | 271657013        | 175458000        | 271657013        |
| Open embolectomy of renal artery                          | 271695015        | 175482005        | 271695015        |
| Open removal of thrombus from vein                        | 272243017        | 175843001        | 272243017        |
| Open thrombectomy of vein of upper limb                   | 272245012        | 175844007        | 272245012        |



**Table S30. Arterial thromboembolic Aurum codes**

| Term                                                       | Medcode ID       | SNOMED CT Concept ID | SNOMED CT Description ID |
|------------------------------------------------------------|------------------|----------------------|--------------------------|
| Embolism and/or thrombosis of the internal iliac artery    | 300554012        | 734298005            | 3503835018               |
| Coronary thrombosis not resulting in myocardial infarction | 299742017        | 194821006            | 299742017                |
| Embolism and thrombosis of the brachial artery             | 300535012        | 195319003            | 300535012                |
| Embolism and thrombosis of the posterior tibial artery     | 300543019        | 195327007            | 300543019                |
| Mesenteric embolus                                         | 412653014        | 276500007            | 412653014                |
| Ischaemic foot                                             | 443199013        | 301755001            | 443199013                |
| Open removal of cardiac thrombus                           | 2675367019       | 426067000            | 2675367019               |
| Percutaneous transluminal thrombolysis of artery           | 2675878019       | 426485003            | 2675878019               |
| Ischaemic disease of gut                                   | 3836741000006113 | 82196007             | 504940010                |
| Acute intestinal ischaemic syndrome                        | 3986491000006113 | 91489000             | 509476019                |
| Intestinal ischaemia                                       | 3836721000006118 | 82196007             | 504938017                |
| Embolism and thrombosis of the celiac artery               | 4778981000006116 | 195342005            | 300560012                |
| Ischaemia reperfusion injury of liver                      | 7821701000006113 | 721715000            | 3325835015               |
| AMI - Acute mesenteric ischaemia                           | 3986481000006110 | 91489000             | 509475015                |
| Inner retinal ischaemic spots                              | 3140891000006117 | 39832008             | 2620723015               |
| Thrombosis of renal artery bypass graft                    | 449993015        | 306857000            | 449993015                |
| Ischaemic toe                                              | 450665015        | 307408003            | 450665015                |
| Mesenteric thrombus and/or embolus                         | 450682018        | 307420006            | 450682018                |
| Infarct of liver                                           | 2783881000006119 | 17890003             | 30227010                 |
| Ischaemic bowel disease                                    | 3836731000006115 | 82196007             | 504939013                |
| Ischaemic optic neuropathy                                 | 476238012        | 14357004             | 476238012                |
| Mesenteric thrombosis                                      | 215511000000110  | 95446005             | 158099015                |
| Post radiological embolism of upper limb artery            | 216711000006118  | 312377009            | 456079019                |
| Ischaemic arm                                              | 5058031000006112 | 233959009            | 350538016                |
| Pulmonary arterial thrombosis                              | 3439711000006111 | 57834008             | 96166019                 |
| Male genital thrombosis NOS                                | 304536019        | 198057005            | 304524013                |
| Ischaemic necrosis                                         | 3901731000006110 | 86217007             | 142974016                |
| Vascular graft embolus                                     | 5925451000006112 | 304090004            | 446358019                |
| Superior mesenteric artery embolus                         | 4785631000006110 | 196999001            | 302978019                |
| Acute ischaemic colitis                                    | 503091015        | 75700000             | 503091015                |
| Thyroid infarction                                         | 1220407012       | 11859008             | 1220407012               |
| Acute infarction of papillary muscle                       | 2663441000006117 | 10273003             | 17900011                 |
| Removal of vessel clot                                     | 866201000006119  | 392031002            | 866201000006119          |
| Arteritic ischaemic optic neuropathy                       | 5008941000006114 | 230508004            | 345412011                |
| Peripheral ischaemic vascular disease                      | 350535018        | 233958001            | 350535018                |
| Upper limb ischaemia                                       | 350540014        | 233959009            | 350540014                |
| Open embolectomy of bifurcation of aorta                   | 271509013        | 175348000            | 271509013                |
| Open embolectomy of carotid artery                         | 271540018        | 175374006            | 271540018                |
| Open embolectomy of axillary artery                        | 271639012        | 175446000            | 271639012                |

|                                                            |                   |                  |                  |
|------------------------------------------------------------|-------------------|------------------|------------------|
| Percutaneous transluminal embolectomy of subclavian artery | 271654018         | 175456001        | 271654018        |
| Percutaneous transluminal embolectomy of brachial artery   | 271656016         | 175457005        | 271656016        |
| Percutaneous transluminal embolectomy of axillary artery   | 271671017         | 175465008        | 271671017        |
| Percutaneous transluminal embolectomy of iliac artery      | 271901019         | 175613000        | 271901019        |
| Open thrombectomy of femoral artery                        | 272032018         | 175704008        | 272032018        |
| Percutaneous transluminal embolectomy of femoral artery    | 272055015         | 175717006        | 272055015        |
| Percutaneous transluminal embolectomy of popliteal artery  | 272056019         | 175718001        | 272056019        |
| Prosthetic graft thrombectomy                              | 272305017         | 175891000        | 272305017        |
| Infarction of fallopian tube                               | 94629010          | 56900004         | 94629010         |
| Infarct of lung                                            | 3551761000006115  | 64662007         | 107460013        |
| Cerebral arterial thrombosis                               | 3662321000006117  | 71444005         | 118691019        |
| Ischaemic foot                                             | 1699111000006110  | 1699111000006106 | 1699111000006110 |
| Percutaneous mechanical thromboembolectomy                 | 359731000000112   | 225291000000108  | 359731000000112  |
| Carotid thromboendarterectomy                              | 3588601000006110  | 66951008         | 111209010        |
| Saddle embolus of abdominal aorta                          | 5058281000006118  | 233972005        | 350565011        |
| Peripheral arterial embolism                               | 884661000006110   | 583731000000103  | 884661000006110  |
| Embolus/thrombus artery NOS                                | 884671000006115   | 583761000000108  | 884671000006115  |
| Embolism                                                   | 887751000006110   | 198850008        | 887751000006110  |
| Arterial embolism and thrombosis NOS                       | 12733161000006111 | 583761000000108  | 1295451000000114 |
| Cholesterol embolus syndrome                               | 354495010         | 236489002        | 354495010        |
| Fogarty embolectomy of artery                              | 1776773010        | 397047005        | 1776773010       |
| Thrombosis - coronary                                      | 1786198013        | 398274000        | 1786198013       |
| Thrombosis of cerebral arteries                            | 3662311000006113  | 71444005         | 118690018        |
| Thromboendarterectomy of aorta                             | 3295821000006118  | 49187005         | 81937019         |
| PC TL embolectomy popliteal artery                         | 4668191000006117  | 175718001        | 272057011        |
| Thrombosis of testis                                       | 3605531000006118  | 67962003         | 112890010        |
| Cerebral arterial embolism                                 | 3728451000006116  | 75543006         | 125471016        |
| IRIS - Inner retinal ischaemic spots                       | 3140901000006118  | 39832008         | 2620724014       |
| Renal infarction                                           | 1848131000006113  | 45456005         | 75778012         |
| Ischaemic nephropathy                                      | 1160091000000115  | 710565001        | 3082872011       |
| Release of ischaemic contracture of forearm                | 4682421000006112  | 178253006        | 275890019        |
| Open embolectomy of inferior mesenteric artery NEC         | 271760012         | 397045002        | 1776771012       |
| Open embolectomy of suprarenal artery NEC                  | 271761011         | 397045002        | 1776771012       |
| Open embolectomy of visceral branch of abdominal aorta NEC | 271780013         | 397045002        | 1776771012       |
| Open embolectomy of artery NEC                             | 272097014         | 397045002        | 1776771012       |
| Open embolectomy of iliac artery                           | 394332017         | 265521000        | 394332017        |
| Renal artery thrombosis                                    | 158317012         | 95579008         | 158317012        |
| Percutaneous thrombolysis of vein                          | 5593341000006115  | 276985008        | 413389019        |
| Brachial embolectomy                                       | 5048991000006113  | 233313002        | 349588014        |

|                                                                     |                   |                 |                  |
|---------------------------------------------------------------------|-------------------|-----------------|------------------|
| Percutaneous transluminal embolectomy of artery NEC                 | 394347014         | 397045002       | 1776771012       |
| Chronic intestinal ischaemia                                        | 4194521000006117  | 111354009       | 361442014        |
| Embolism and thrombosis of other specified artery                   | 300552011         | 266262004       | 395794011        |
| Arterial embolism and thrombosis NOS                                | 300564015         | 266262004       | 395794011        |
| Infarction of thyroid                                               | 2688811000006110  | 11859008        | 20465014         |
| Occlusive thromboarteriopathy                                       | 6206441000006110  | 359789008       | 475141015        |
| Percutaneous transluminal thrombolysis of blood vessel of liver     | 1545591000006112  | 426059008       | 2675452017       |
| Percutaneous transluminal thrombolysis and reconstruction of artery | 1548401000006112  | 428068004       | 2696045014       |
| Aortic bifurcation embolus                                          | 5058291000006115  | 233972005       | 350566012        |
| Acute colonic ischaemia                                             | 3730871000006110  | 75700000        | 2310141000000117 |
| Embolectomy                                                         | 3668011000006113  | 71815002        | 119306015        |
| Embolism and thrombosis of a leg artery NOS                         | 300547018         | 195318006       | 300534011        |
| Peripheral arterial embolism and thrombosis NOS                     | 300550015         | 195318006       | 300534011        |
| Renal artery embolism                                               | 158318019         | 95580006        | 158318019        |
| Embolectomy of popliteal artery                                     | 5049001000006113  | 233314008       | 349592019        |
| Multiple infarcts                                                   | 2947401000006115  | 27876002        | 46655014         |
| Infarction of kidney                                                | 3233381000006117  | 45456005        | 75780018         |
| Ocular ischaemic syndrome                                           | 6045981000006117  | 314436005       | 458797013        |
| Mesenteric embolism                                                 | 412652016         | 276500007       | 412652016        |
| Vertebrobasilar ischaemic vertigo                                   | 5034291000006111  | 232288005       | 348027016        |
| Infarction                                                          | 3403531000006115  | 55641003        | 92491010         |
| Embolism in vascular graft                                          | 446359010         | 304090004       | 446359010        |
| Thromboembolus of internal iliac artery                             | 3503835018        | 734298005       | 3503835018       |
| SMAE - Superior mesenteric artery embolus                           | 4785641000006117  | 196999001       | 302979010        |
| Thrombosis of stent of renal artery                                 | 1848121000006110  | 840961000000108 | 2182101000000113 |
| Popliteal artery thrombosis                                         | 3918361000006110  | 87239004        | 144656012        |
| Arterial embolism                                                   | 3387371000006112  | 54687002        | 90875013         |
| Stroke due to basilar artery thrombus                               | 3508956015        | 329641000119104 | 3508956015       |
| Femoral embolectomy                                                 | 2634331000006113  | 8409001         | 1234899012       |
| Hemopericardium due to and following acute myocardial infarction    | 12220751000006113 | 194862000       | 3673281015       |
| Cerebral infarction due to occlusion of precerebral artery          | 542261000006114   | 125081000119106 | 3042974014       |
| Carotid artery thrombosis                                           | 100771000006112   | 86003009        | 142588012        |
| Occlusive mesenteric ischaemia                                      | 5086201000006115  | 235842000       | 353530010        |
| Multiple lacunar infarcts                                           | 5967391000006111  | 307363008       | 450609012        |
| Thyroid hemorrhage and infarction                                   | 4757961000006112  | 190305000       | 292442019        |
| Non-occlusive thrombus                                              | 2927841000006117  | 26713004        | 44719012         |
| Open embolectomy of coeliac artery NEC                              | 271757017         | 397045002       | 1776771012       |
| Multifocal infarct                                                  | 3474711000006110  | 60007006        | 99691019         |
| Infarction of spleen                                                | 38632019          | 22996003        | 1223010014       |
| Thrombectomy                                                        | 3205401000006110  | 43810009        | 73061013         |

|                                                                                                           |                   |           |            |
|-----------------------------------------------------------------------------------------------------------|-------------------|-----------|------------|
| Ischaemic hepatitis                                                                                       | 5086761000006113  | 235877000 | 353591011  |
| Ischaemic gangrene                                                                                        | 6670921000006117  | 402861007 | 1773672019 |
| Thrombosis of atrium, auricular appendage, and ventricle due to and following acute myocardial infarction | 12220791000006119 | 194868001 | 3673277015 |
| Lacunar infarction                                                                                        | 299342019         | 230698000 | 345651012  |
| Embolectomy of iliac artery                                                                               | 5153821000006115  | 240928009 | 360865017  |
| Embolectomy of femoral artery                                                                             | 2634321000006110  | 8409001   | 14892019   |
| Ischaemic ulcer of toe                                                                                    | 7108391000006114  | 429768000 | 2693575017 |
| Removal of thrombus of arteriovenous fistula                                                              | 7081801000006114  | 427992007 | 2691808018 |
| Ischemic infarction of muscle                                                                             | 5143791000006114  | 240126009 | 359749018  |
| Thyroid haemorrhage or infarction NOS                                                                     | 292445017         | 190305000 | 292443012  |
| Thromboangiitis obliterans NOS                                                                            | 300503012         | 52403007  | 87208017   |
| Embolism and thrombosis of an arm artery NOS                                                              | 300538014         | 195318006 | 300534011  |
| Thrombosis                                                                                                | 7218941000006118  | 439127006 | 2794470015 |
| Thrombosis                                                                                                | 5477661000006119  | 264579008 | 393059012  |
| Saddle embolus                                                                                            | 350563016         | 233972005 | 350563016  |
| Infarction of liver                                                                                       | 2783891000006116  | 17890003  | 1221609013 |
| Femoral artery embolus                                                                                    | 5058301000006119  | 233973000 | 350567015  |
| Critical lower limb ischaemia                                                                             | 5058111000006119  | 233962007 | 350547012  |
| Subclavian artery thrombosis                                                                              | 5836921000006114  | 297154003 | 437620017  |
| Lacunar infarct                                                                                           | 3818181000006114  | 81037000  | 134436018  |
| Ischaemia of feet                                                                                         | 5886711000006111  | 300917007 | 442114010  |
| Embolism and/or thrombosis of the external iliac artery                                                   | 300555013         | 734299002 | 3503839012 |
| Renal infarct                                                                                             | 3233391000006119  | 45456005  | 75781019   |
| Embolectomy of carotid artery                                                                             | 5902211000006114  | 302053004 | 443591015  |
| Lower limb arterial embolus                                                                               | 6015571000006117  | 312378004 | 456080016  |
| Embolectomy of lower limb artery                                                                          | 3688071000006119  | 73038007  | 121315013  |
| Thrombolysis of artery                                                                                    | 5049421000006111  | 233335005 | 349633016  |
| Thyroid haemorrhage and infarction                                                                        | 292443012         | 190305000 | 292443012  |
| Embolism and thrombosis of an arm or leg artery                                                           | 300534011         | 195318006 | 300534011  |
| Embolism and/or thrombosis of the common iliac artery                                                     | 300553018         | 195335005 | 300553018  |
| Embolism and thrombosis of the splenic artery                                                             | 300558010         | 195340002 | 300558010  |
| Acute intestinal ischaemia                                                                                | 3986461000006117  | 91489000  | 509473010  |
| Post-radiological embolism of upper limb artery                                                           | 6015561000006112  | 312377009 | 456079019  |
| Colonic ischaemia                                                                                         | 2992791000006113  | 30588004  | 1216341014 |
| Ischaemic priapism                                                                                        | 7252011000006114  | 441575009 | 2817057019 |
| Digital arterial thrombosis                                                                               | 5886741000006110  | 300919005 | 442117015  |
| Percutaneous transluminal venous thrombolysis NEC                                                         | 358041000000114   | 276985008 | 413389019  |
| Percutaneous removal of thrombus from vein NOS                                                            | 359571000000118   | 276977004 | 413381016  |
| Lower limb ischaemia                                                                                      | 5058071000006110  | 233961000 | 350544017  |
| Arterial embolus                                                                                          | 3387391000006113  | 54687002  | 497013010  |

|                                                                              |                   |                 |                  |
|------------------------------------------------------------------------------|-------------------|-----------------|------------------|
| Embolism                                                                     | 3402611000006115  | 55584005        | 92392016         |
| Percutaneous transluminal embolectomy of bifurcation of aorta                | 232881000006113   | 175356002       | 271519019        |
| Embolus/thrombosis abd. aorta                                                | 884641000006111   | 266263009       | 884641000006111  |
| Embolus/thrombosis aorta NOS                                                 | 884651000006113   | 195317001       | 884651000006113  |
| Removal of thrombus from intracranial artery                                 | 2845481000006110  | 21710002        | 36433012         |
| Percutaneous embolectomy of brachial artery                                  | 4667301000006111  | 175457005       | 271655017        |
| Acute mesenteric ischaemia                                                   | 457631000006114   | 91489000        | 509474016        |
| Mesenteric infarction                                                        | 523601000006115   | 3558002         | 7001012          |
| Embolism and thrombosis of other and unspec parts aorta                      | 638871000006114   | 274101000       | 409861010        |
| Embolus of the superior mesenteric artery                                    | 639241000006110   | 196999001       | 302978019        |
| Percutaneous transluminal thrombectomy of blood vessel of liver              | 1545581000006114  | 428953003       | 2692834012       |
| Percutaneous transluminal venous thrombolysis with reconstruction            | 1549761000006110  | 429141007       | 1659501000000119 |
| Retinal ischaemia                                                            | 483237018         | 26468004        | 483237018        |
| Ischaemic                                                                    | 5360051000006112  | 255426005       | 380631011        |
| Asymptomatic ischaemia                                                       | 5056261000006112  | 233823002       | 350356015        |
| Embolism of iliac artery                                                     | 3807321000006113  | 80383008        | 133386017        |
| Arterial embolus and thrombosis                                              | 395795012         | 266262004       | 395795012        |
| Occlusive thrombus                                                           | 3771791000006113  | 78195007        | 129763011        |
| Arterial ischaemia                                                           | 5057951000006115  | 233957006       | 350532015        |
| Intracranial thrombectomy                                                    | 2845491000006113  | 21710002        | 36434018         |
| Acute ischaemia of small intestine                                           | 8321371000006112  | 906191000000102 | 2329961000000119 |
| Rupture of chordae tendinae due to and following acute myocardial infarction | 12220781000006117 | 194866002       | 3673278013       |
| Ischaemic finger                                                             | 5967971000006111  | 307409006       | 450668018        |
| Ischaemic ulcer                                                              | 2721231000006112  | 13954005        | 475615013        |
| Mural thrombosis                                                             | 1235655012        | 91335003        | 1235655012       |
| Ischaemic leg ulcer                                                          | 357895013         | 238793001       | 357895013        |
| Ischaemic foot ulcer                                                         | 5126451000006116  | 238794007       | 357897017        |
| Left ventricular thrombus                                                    | 748061000006117   | 309519009       | 452964014        |
| Ischaemia                                                                    | 3353921000006110  | 52674009        | 496400017        |
| Embolism and thrombosis of the iliac artery unspecified                      | 300556014         | 266262004       | 395794011        |
| [X]Embolism and thrombosis of other arteries                                 | 300964011         | 266262004       | 395794011        |
| Vessel incision - embolectomy                                                | 866261000006118   | 597641000000105 | 866261000006118  |
| Embolism and thrombosis of the anterior tibial artery                        | 300541017         | 195325004       | 300541017        |
| Embolism and thrombosis of the axillary artery                               | 300559019         | 195341003       | 300559019        |
| Embolectomy of subclavian artery                                             | 5888791000006119  | 301080008       | 442323018        |
| [X] Embolism from prosthetic heart valve                                     | 358931000006111   | 35688006        | 59527012         |
| Omental infarction                                                           | 3722741000006113  | 75204008        | 124899011        |
| Embolism and thrombosis of other arteries NOS                                | 300563014         | 266262004       | 395794011        |
| Acute atrial infarction                                                      | 299719012         | 194809007       | 299719012        |
| Atrial thrombosis                                                            | 300234010         | 195147006       | 300234010        |

|                                                       |                   |                 |                  |
|-------------------------------------------------------|-------------------|-----------------|------------------|
| Embolism and thrombosis of the radial artery          | 300536013         | 195320009       | 300536013        |
| Embolism and thrombosis of the coeliac artery         | 300561011         | 195342005       | 300561011        |
| Arterial embolism/thrombosis                          | 884631000006118   | 266262004       | 884631000006118  |
| Thromboembolism                                       | 6348271000006116  | 371039008       | 1228915016       |
| Percutaneous aspiration thromboembolectomy            | 359871000000116   | 225361000000106 | 359871000000116  |
| Thrombectomy of arteriovenous fistula                 | 360031000000113   | 427992007       | 2694416018       |
| Ischaemic leg                                         | 742481000006118   | 233961000       | 350546015        |
| Arterial embolectomy                                  | 6580991000006118  | 397045002       | 1776771012       |
| Peripheral arterial embolism and thrombosis NOS       | 12733151000006114 | 583731000000103 | 1295391000000110 |
| Thrombus                                              | 6568121000006118  | 396339007       | 1776291018       |
| Open embolectomy of subclavian artery                 | 271633013         | 175440006       | 271633013        |
| Multi-infarct state                                   | 5011261000006110  | 230704000       | 345662012        |
| Thrombosis of renal artery                            | 4059051000006119  | 95579008        | 158316015        |
| Aortic thromboembolism                                | 5560171000006116  | 274101000       | 409861010        |
| Femoral artery thrombosis                             | 3345371000006113  | 52156004        | 86808015         |
| Open embolectomy of artery NEC                        | 12723621000006114 | 597641000000105 | 1324221000000116 |
| Ischaemic colitis                                     | 12705101000006115 | 30588004        | 484643015        |
| Embolism and thrombosis of the abdominal aorta        | 395796013         | 266263009       | 395796013        |
| Open embolectomy of common iliac artery               | 411214011         | 275254000       | 411214011        |
| H/O: embolism                                         | 411539015         | 275545002       | 411539015        |
| Infarction of ovary                                   | 6297018           | 3129009         | 6297018          |
| Renal infarction                                      | 75778012          | 45456005        | 75778012         |
| Other embolism and thrombosis                         | 300712012         | 429098002       | 2692478010       |
| Mesenteric embolus NOS                                | 302983010         | 276500007       | 412653014        |
| Thrombosis of artery of transplanted kidney           | 2234541000000115  | 864271000000105 | 2234541000000115 |
| Percutaneous embolectomy of popliteal artery          | 4668171000006118  | 175718001       | 272058018        |
| Critical ischaemia of foot                            | 6021731000006115  | 312822006       | 456609017        |
| Splenic infarction                                    | 2866521000006111  | 22996003        | 38632019         |
| Percutaneous transluminal embolectomy of renal artery | 271705017         | 175489001       | 271705017        |
| Open embolectomy of femoral artery                    | 272031013         | 175704008       | 272031013        |
| Open femoral embolectomy                              | 272033011         | 175704008       | 272033011        |
| Percutaneous thrombolysis of intracranial artery      | 5014421000006115  | 230935003       | 345980018        |
| Vertebral artery thrombosis                           | 3553621000006119  | 64775002        | 107661016        |
| Myelopathy due to arterial thrombosis of spinal cord  | 297138017         | 192898007       | 297138017        |
| Embolism and thrombosis of the thoracic aorta         | 300533017         | 195317001       | 300533017        |
| Embolism and thrombosis of the ulnar artery           | 300537016         | 195321008       | 300537016        |
| Embolism and thrombosis of the popliteal artery       | 300540016         | 195324000       | 300540016        |
| Thrombosed aneurysm                                   | 4374441000006113  | 125271003       | 193761013        |
| LACI - Lacunar infarction                             | 5011171000006110  | 230698000       | 345653010        |
| Infarction of breast                                  | 128289017         | 77296004        | 128289017        |
| Thrombotic infarction                                 | 3756351000006111  | 77255002        | 128233014        |

|                                                                  |                   |                  |                  |
|------------------------------------------------------------------|-------------------|------------------|------------------|
| Microvascular embolism of arteriole                              | 7855891000006114  | 724439005        | 3438135014       |
| Percutaneous thrombolysis of artery                              | 5593331000006113  | 276984007        | 413388010        |
| Ischaemic foot pain when walking                                 | 2377911000000114  | 713674006        | 3295993015       |
| Embolism and thrombosis of the hepatic artery                    | 300562016         | 195343000        | 3491726018       |
| Thrombotic microangiopathy NOS                                   | 300587011         | 126729006        | 135665013        |
| Embolism and thrombosis NOS                                      | 300713019         | 429098002        | 2692478010       |
| Ischaemic foot pain at rest                                      | 2377871000000112  | 713412006        | 3289284017       |
| Hepatic infarction                                               | 30226018          | 17890003         | 30226018         |
| Thromboangiitis obliterans                                       | 87208017          | 52403007         | 87208017         |
| Cardiac rupture due to and following acute myocardial infarction | 12221301000006119 | 233847009        | 3673284011       |
| Thrombosis of corpus cavernosum                                  | 3215871000006116  | 44437005         | 74102013         |
| Anterior spinal artery thrombosis                                | 345723011         | 230740003        | 345723011        |
| Peripheral ischaemia                                             | 350533013         | 233958001        | 350533013        |
| Nephropathy due to ischaemia                                     | 7674011000006115  | 710565001        | 3044790019       |
| Irreversible ischaemic colitis                                   | 2936461000006116  | 27241008         | 483469013        |
| Embolus due to internal prosthetic device                        | 324950011         | 213131003        | 324950011        |
| Thromboembolic disease                                           | 6348281000006118  | 371039008        | 1228916015       |
| Infarct                                                          | 3403521000006118  | 55641003         | 92488010         |
| Retinal embolus                                                  | 6702781000006116  | 404667009        | 2156561018       |
| Embolism and thrombosis of hepatic artery                        | 4778991000006118  | 195343000        | 3491726018       |
| Arteriovenous fistula thrombosis                                 | 350892013         | 234205007        | 350892013        |
| Renal artery stent thrombosis                                    | 1809151000006116  | 1809151000006100 | 1809151000006116 |
| Superior mesenteric artery thrombosis                            | 100811000006112   | 197000003        | 302980013        |
| Choroidal infarct                                                | 6041261000006115  | 314003000        | 458273015        |
| Thromboembolus of external iliac artery                          | 3503839012        | 734299002        | 3503839012       |
| Acute lacunar infarction                                         | 7054171000006115  | 426107000        | 2674093010       |
| Acute infarct                                                    | 3400671000006111  | 55470003         | 92217011         |
| Superficial femoral embolectomy                                  | 6019821000006117  | 312689003        | 456443016        |
| Percutaneous embolectomy of aortoiliac segment                   | 4666711000006113  | 175356002        | 271520013        |
| Embolism and thrombosis NOS                                      | 638821000006113   | 429098002        | 2692478010       |
| Thrombosis of vessels of cord                                    | 2962491000006118  | 28773001         | 48182014         |
| Embolectomy operation                                            | 5559451000006118  | 274021001        | 409761015        |
| History of thrombosis                                            | 5574371000006118  | 275546001        | 2986432016       |
| Ischaemic nephropathy                                            | 1757951000006119  | 1757951000006103 | 1757951000006119 |
| Arterial thrombosis                                              | 218541000000116   | 65198009         | 108347015        |
| Thromboendarterectomy                                            | 866221000006112   | 392031002        | 866221000006112  |
| Open thrombectomy of popliteal artery                            | 272034017         | 175705009        | 272034017        |
| Open embolectomy popliteal artery                                | 272035016         | 175705009        | 272035016        |
| Arterial embolism and thrombosis                                 | 491241000006118   | 266262004        | 395795012        |
| Retinal microembolism                                            | 169951000006111   | 76975009         | 127782012        |
| Ischaemic lower limb pain at rest                                | 8278561000006114  | 836711000000108  | 2172511000000111 |
| Corpus cavernosum thrombosis                                     | 1230092014        | 44437005         | 1230092014       |

|                                                                             |                   |                 |                 |
|-----------------------------------------------------------------------------|-------------------|-----------------|-----------------|
| Renal artery embolus                                                        | 1235925019        | 95580006        | 1235925019      |
| Thrombosis of middle cerebral artery                                        | 7598991000006116  | 705129007       | 3023377010      |
| Haemopericardium due to and following acute myocardial infarction           | 12220761000006110 | 194862000       | 3673282010      |
| Testicular thrombosis                                                       | 1232993010        | 67962003        | 1232993010      |
| Percutaneous transluminal thrombolysis of femoral graft using streptokinase | 238621000006112   | 309449009       | 452880015       |
| Thrombosis of arteries of lower extremity                                   | 3978101000006118  | 90958004        | 150730010       |
| [RFC] Arterial embolism of limbs                                            | 905541000006119   | 905541000006103 | 905541000006119 |
| Infarction of prostate                                                      | 36968017          | 22035000        | 36968017        |
| Spinal cord infarct                                                         | 7156221000006114  | 432249006       | 2770833019      |
| Post radiological embolism of lower limb artery                             | 216701000006116   | 312380005       | 456083019       |
| Ischaemic infarction of muscle                                              | 359748014         | 240126009       | 359748014       |
| Arterial embolic and thrombotic occlusion                                   | 395794011         | 266262004       | 395794011       |
| Limb ischaemia                                                              | 8009281000006110  | 21631000119105  | 2923092011      |
| Open embolectomy of superior mesenteric artery NEC                          | 271759019         | 397045002       | 1776771012      |
| Embolism and thrombosis of the femoral artery                               | 300539018         | 195323006       | 300539018       |
| Embolism and thrombosis of the dorsalis pedis artery                        | 300542012         | 195326003       | 300542012       |
| Embolism and thrombosis of the subclavian artery                            | 300557017         | 195339004       | 300557017       |
| Scrotal thrombosis                                                          | 304527018         | 198059008       | 304527018       |
| Percutaneous embolectomy of femoral artery                                  | 4668151000006111  | 175717006       | 272054016       |
| Post-radiological embolism of lower limb artery                             | 6015601000006112  | 312380005       | 456083019       |
| Infarct of prostate                                                         | 2850821000006117  | 22035000        | 1222704012      |
| Open embolectomy of brachial artery                                         | 271635018         | 175442003       | 271635018       |
| Open embolectomy of vertebral artery                                        | 271636017         | 175443008       | 271636017       |
| Percutaneous transluminal embolectomy of vertebral artery                   | 271657013         | 175458000       | 271657013       |
| Open embolectomy of renal artery                                            | 271695015         | 175482005       | 271695015       |



**Table S31. Thromboembolic HES (ICD10) codes**

| ICD10 codes | Term                                                                                                                    |
|-------------|-------------------------------------------------------------------------------------------------------------------------|
| D73.5       | Infarction of spleen                                                                                                    |
| H34.0       | Transient retinal artery occlusion                                                                                      |
| H34.1       | Central retinal artery occlusion                                                                                        |
| H34.2       | Other retinal artery occlusions                                                                                         |
| H34.8       | Other retinal vascular occlusions                                                                                       |
| H34.9       | Retinal vascular occlusion, unspecified                                                                                 |
| I23.6       | Thrombosis of atrium, auricular appendage, and ventricle as current complications following acute myocardial infarction |
| I26.0       | Pulmonary embolism with mention of acute cor pulmonale                                                                  |
| I26.9       | Pulmonary embolism without mention of acute cor pulmonale                                                               |
| I51.3       | Intracardiac thrombosis, not elsewhere classified                                                                       |
| I65.0       | Occlusion and stenosis of vertebral artery                                                                              |
| I65.1       | Occlusion and stenosis of basilar artery                                                                                |
| I65.2       | Occlusion and stenosis of carotid artery                                                                                |
| I65.3       | Occlusion and stenosis of multiple and bilateral precerebral arteries                                                   |
| I65.8       | Occlusion and stenosis of other precerebral artery                                                                      |
| I65.9       | Occlusion and stenosis of unspecified precerebral artery                                                                |
| I66.0       | Occlusion and stenosis of middle cerebral artery                                                                        |
| I66.1       | Occlusion and stenosis of anterior cerebral artery                                                                      |
| I66.2       | Occlusion and stenosis of posterior cerebral artery                                                                     |
| I66.3       | Occlusion and stenosis of cerebellar arteries                                                                           |
| I66.4       | Occlusion and stenosis of multiple and bilateral cerebral arteries                                                      |
| I66.8       | Occlusion and stenosis of other cerebral artery                                                                         |
| I66.9       | Occlusion and stenosis of unspecified cerebral artery                                                                   |
| I67.6       | Nonpyogenic thrombosis of intracranial venous system                                                                    |
| I73.1       | Thromboangiitis obliterans [Buerger]                                                                                    |
| I74.0       | Embolism and thrombosis of abdominal aorta                                                                              |
| I74.1       | Embolism and thrombosis of other and unspecified parts of aorta                                                         |
| I74.2       | Embolism and thrombosis of arteries of upper extremities                                                                |
| I74.3       | Embolism and thrombosis of arteries of lower extremities                                                                |
| I74.4       | Embolism and thrombosis of arteries of extremities, unspecified                                                         |
| I74.5       | Embolism and thrombosis of iliac artery                                                                                 |
| I74.8       | Embolism and thrombosis of other arteries                                                                               |
| I74.9       | Embolism and thrombosis of unspecified artery                                                                           |
| I80.0       | Phlebitis and thrombophlebitis of superficial vessels of lower extremities                                              |
| I80.1       | Phlebitis and thrombophlebitis of femoral vein                                                                          |
| I80.2       | Phlebitis and thrombophlebitis of other deep vessels of lower extremities                                               |
| I80.3       | Phlebitis and thrombophlebitis of lower extremities, unspecified                                                        |
| I80.8       | Phlebitis and thrombophlebitis of other sites                                                                           |
| I80.9       | Phlebitis and thrombophlebitis of unspecified site                                                                      |

|        |                                                  |
|--------|--------------------------------------------------|
| I81    | Portal vein thrombosis                           |
| I82.1  | Thrombophlebitis migrans                         |
| I82.2  | Embolism and thrombosis of vena cava             |
| I82.3  | Embolism and thrombosis of renal vein            |
| I82.8  | Embolism and thrombosis of other specified veins |
| I82.9  | Embolism and thrombosis of unspecified vein      |
| I84.0  | Internal thrombosed haemorrhoids                 |
| I84.3  | External thrombosed haemorrhoids                 |
| I84.7  | Unspecified thrombosed haemorrhoids              |
| K55.0  | Acute vascular disorders of intestine            |
| K55.9  | Vascular disorder of intestine, unspecified      |
| K64.5  | Perianal venous thrombosis                       |
| K76.3  | Infarction of liver                              |
| M31.1  | Thrombotic microangiopathy                       |
| M62.2  | Ischaemic infarction of muscle                   |
| M62.20 | Ischaemic infarction of muscle, unspecified site |
| M62.21 | Ischaemic infarction of muscle, shoulder         |
| M62.22 | Ischaemic infarction of muscle, upper arm        |
| M62.23 | Ischaemic infarction of muscle, forearm          |
| M62.24 | Ischaemic infarction of muscle, hand             |
| M62.25 | Ischaemic infarction of muscle, thigh            |
| M62.26 | Ischaemic infarction of muscle, lower leg        |
| M62.27 | Ischaemic infarction of muscle, ankle and foot   |
| M62.28 | Ischaemic infarction of muscle, other site       |
| N28.0  | Ischaemia and infarction of kidney               |

**Table S32. Myocardial infarction outcome Aurum codes**

| Term                                                         | Medcode ID       | SNOMED CT Concept ID | SNOMED CT Description ID |
|--------------------------------------------------------------|------------------|----------------------|--------------------------|
| Electrocardiogram: lateral infarction                        | 4586241000006113 | 164871004            | 2619220010               |
| Acute anteroapical infarction                                | 299708014        | 52035003             | 3038718019               |
| Subsequent myocardial infarction of inferior wall            | 299812011        | 194858006            | 299812011                |
| Acute Q-wave infarct                                         | 447324018        | 304914007            | 447324018                |
| Electrocardiographic subendocardial infarct                  | 4586211000006114 | 164870003            | 3300442017               |
| Acute transmural myocardial infarction of unspecified site   | 460681000006116  | 57054005             | 94884017                 |
| Postmyocardial infarction syndrome                           | 3576371000006117 | 66189004             | 109915012                |
| Acute non-Q wave infarction                                  | 450322013        | 307140009            | 450322013                |
| H/O: Myocardial infarction in last year                      | 451369010        | 308065005            | 451369010                |
| Post infarct angina                                          | 458410010        | 314116003            | 458410010                |
| ECG: antero-septal infarct.                                  | 256455012        | 164868007            | 256455012                |
| Myocardial infarct                                           | 2855351000006111 | 22298006             | 1784873012               |
| Acute myocardial infarction of inferolateral wall            | 3565871000006113 | 65547006             | 108912018                |
| Acute inferior myocardial infarction                         | 3699921000006110 | 73795002             | 1233665015               |
| Other acute and subacute ischaemic heart disease             | 39111000006114   | 414545008            | 2534663012               |
| Lateral infarction on electrocardiogram                      | 4586221000006118 | 164871004            | 2692104017               |
| Electrocardiographic myocardial infarction                   | 4586041000006115 | 164865005            | 3300376010               |
| Post-infarction pericarditis                                 | 5056941000006119 | 233885007            | 350431013                |
| CT - Coronary thrombosis                                     | 6601131000006115 | 398274000            | 1786196012               |
| Subsequent myocardial infarction of unspecified site         | 118831000006118  | 194856005            | 299808017                |
| Postoperative transmural myocardial infarction other sites   | 212081000006112  | 129574000            | 208365015                |
| Postoperative transmural myocardial infarction unspec site   | 212091000006110  | 129574000            | 208365015                |
| Post infarction pericarditis                                 | 216351000006118  | 233885007            | 350431013                |
| Acute myocardial infarction of atrium                        | 4775891000006119 | 194809007            | 2470032018               |
| Defect of ventricular septum following myocardial infarction | 5056521000006115 | 233846000            | 3333538017               |
| Acute myocardial infarction of septum                        | 3784911000006111 | 79009004             | 131106018                |
| EKG:posterior/inferior infarct                               | 4586171000006112 | 164869004            | 3300251011               |
| Aborted myocardial infarction                                | 4775931000006111 | 194821006            | 2619483012               |
| EKG: myocardial infarction                                   | 4586051000006118 | 164865005            | 3300377018               |
| Other acute myocardial infarction NOS                        | 299720018        | 57054005             | 94884017                 |
| History of myocardial infarction in last year                | 5974481000006116 | 308065005            | 2986726013               |
| Acute papillary muscle infarction                            | 1218860015       | 10273003             | 1218860015               |
| Acute myocardial infarction of anterolateral wall            | 3641641000006116 | 70211005             | 116613011                |
| Acute infarction of papillary muscle                         | 2663441000006117 | 10273003             | 17900011                 |
| Acute Q wave myocardial infarction                           | 5935321000006111 | 304914007            | 447323012                |
| Silent myocardial infarction                                 | 350376014        | 233843008            | 350376014                |
| Microinfarction of heart                                     | 1229885017       | 42531007             | 1229885017               |
| Coronary artery thrombosis                                   | 6601121000006118 | 398274000            | 1777817018               |

|                                                                                                               |                   |                  |                  |
|---------------------------------------------------------------------------------------------------------------|-------------------|------------------|------------------|
| EKG: subendocardial infarct                                                                                   | 4586201000006111  | 164870003        | 3300441012       |
| Coronary thrombosis                                                                                           | 884141000006116   | 57054005         | 884141000006116  |
| ECG: myocardial infarct NOS                                                                                   | 256460011         | 164865005        | 256452010        |
| Acute ST segment elevation myocardial infarction                                                              | 1780491019        | 401303003        | 1780491019       |
| Thrombosis - coronary                                                                                         | 1786198013        | 398274000        | 1786198013       |
| Electrocardiogram finding of infarction                                                                       | 4586031000006113  | 164865005        | 2693159014       |
| MI - Myocardial infarction                                                                                    | 2855341000006114  | 22298006         | 1784872019       |
| True posterior wall infarction                                                                                | 4775881000006117  | 194802003        | 2535851011       |
| Pericarditis following myocardial infarction                                                                  | 5056951000006117  | 233885007        | 350432018        |
| Postoperative myocardial infarction                                                                           | 208365015         | 129574000        | 208365015        |
| MI - Silent myocardial infarction                                                                             | 5056461000006113  | 233843008        | 350377017        |
| Acute myocardial infarction of septum alone                                                                   | 3784921000006115  | 79009004         | 131107010        |
| Acute myocardial infarction of posterolateral wall                                                            | 967931000006114   | 15990001         | 27071012         |
| Previous myocardial infarction                                                                                | 6619201000006117  | 399211009        | 545891000000115  |
| Acute myocardial infarction of lateral wall                                                                   | 3452181000006112  | 58612006         | 97399018         |
| Subsequent NSTEMI (non-ST segment elevation myocardial infarction)                                            | 7574491000006114  | 703360004        | 3008532019       |
| Myocardial infarction with complication                                                                       | 6348651000006112  | 371068009        | 6348651000006112 |
| Acute lateral myocardial infarction                                                                           | 299711010         | 58612006         | 1231860015       |
| Hemopericardium due to and following acute myocardial infarction                                              | 12220751000006113 | 194862000        | 3673281015       |
| Infarction of heart                                                                                           | 2855311000006110  | 22298006         | 37441018         |
| Ventricular septal defect as current complication following acute myocardial infarction                       | 67081000006119    | 233846000        | 350381017        |
| Acute inferior ST segment elevation myocardial infarction                                                     | 7572341000006117  | 703213009        | 3007793013       |
| Post-myocardial infarction syndrome                                                                           | 109915012         | 66189004         | 500341014        |
| Coronary artery embolism                                                                                      | 2981141000006112  | 29899005         | 50041016         |
| AMI - Acute myocardial infarction                                                                             | 3427201000006111  | 57054005         | 1231678011       |
| Cause of Death- Myocardial Infarction                                                                         | 1576271000006117  | 1576271000006101 | 1576271000006117 |
| Rupture of chordae tendinae as current complication following acute myocardial infarction                     | 158611000006118   | 194866002        | 299822017        |
| Postoperative transmural myocardial infarction of inferior wall                                               | 212071000006114   | 311793000        | 455419012        |
| Thrombosis of atrium, auricular appendage, and ventricle due to and following acute myocardial infarction     | 12220791000006119 | 194868001        | 3673277015       |
| Acute anterior myocardial infarction                                                                          | 299707016         | 54329005         | 1231324017       |
| Acute posterior myocardial infarction                                                                         | 299710011         | 233838001        | 350371016        |
| Rupture of cardiac wall without hemopericardium as current complication following acute myocardial infarction | 4776251000006118  | 194865003        | 299820013        |
| Other acute myocardial infarction                                                                             | 299718016         | 57054005         | 94884017         |
| Acute myocardial infarction of anterior wall                                                                  | 3381601000006117  | 54329005         | 90302019         |
| Acute ST segment elevation myocardial infarction of inferior wall                                             | 7572321000006112  | 703213009        | 3007915011       |
| Anterior myocardial infarction NOS                                                                            | 299709018         | 54329005         | 1231324017       |
| True posterior myocardial infarction                                                                          | 299712015         | 194802003        | 299712015        |
| Subsequent myocardial infarction of anterior wall                                                             | 299811016         | 194857001        | 299811016        |

|                                                                                           |                   |                 |                 |
|-------------------------------------------------------------------------------------------|-------------------|-----------------|-----------------|
| Cardiac infarction                                                                        | 2855321000006119  | 22298006        | 37442013        |
| Rupture of papillary muscle as current complication following acute myocardial infarction | 159001000006119   | 194867006       | 299823010       |
| Acute inferolateral myocardial infarction                                                 | 457531000006110   | 65547006        | 1232697013      |
| Acute STEMI (ST elevation myocardial infarction) of inferior wall                         | 7572331000006110  | 703213009       | 3007397011      |
| ECG: subendocardial infarct                                                               | 256458014         | 164870003       | 256458014       |
| Electrocardiogram: anteroseptal infarction                                                | 4586141000006116  | 164868007       | 2619217019      |
| Acute myocardial infarction of inferoposterior wall                                       | 3745741000006117  | 76593002        | 127193015       |
| Acute STEMI (ST elevation myocardial infarction) of anterior wall                         | 7571601000006115  | 703164000       | 3007542019      |
| Electrocardiographic posterior/inferior infarct                                           | 4586181000006110  | 164869004       | 3300252016      |
| [RFC] Myocardial infarction (MI)                                                          | 905351000006113   | 905351000006109 | 905351000006113 |
| Septal infarction by electrocardiogram                                                    | 2515471000006117  | 1077002         | 2972454013      |
| Cardiac rupture after acute myocardial infarction                                         | 537751000006115   | 233847009       | 350383019       |
| Diabetes mellitus insulin-glucose infusion in acute myocardial infarction                 | 616081000006113   | 315287002       | 459791015       |
| Rupture of chordae tendinae due to and following acute myocardial infarction              | 12220781000006117 | 194866002       | 3673278013      |
| Infarct mycardiectomy                                                                     | 865031000006114   | 585461000000102 | 865031000006114 |
| Acute atrial infarction                                                                   | 299719012         | 194809007       | 299719012       |
| Subsequent myocardial infarction                                                          | 299808017         | 194856005       | 299808017       |
| Acute anteroseptal myocardial infarction                                                  | 455651000006114   | 62695002        | 104192010       |
| Heart attack                                                                              | 37443015          | 22298006        | 37443015        |
| Myocardial infarction with complication                                                   | 543291000006110   | 371068009       | 1209776017      |
| Acute anterior ST segment elevation myocardial infarction                                 | 7571581000006113  | 703164000       | 3007817016      |
| ECG: anteroseptal infarction                                                              | 4586131000006114  | 164868007       | 256456013       |
| [X]Acute transmural myocardial infarction of unspecif site                                | 362461000006119   | 57054005        | 94884017        |
| First myocardial infarction                                                               | 932081000006118   | 932081000006102 | 932081000006118 |
| ECG:posterior/inferior infarct                                                            | 256457016         | 164869004       | 256457016       |
| STEMI - ST elevation myocardial infarction                                                | 6651221000006117  | 401303003       | 2840840013      |
| Acute nontransmural infarction                                                            | 3645351000006114  | 70422006        | 116993010       |
| Postoperative subendocardial myocardial infarction                                        | 455422014         | 311796008       | 455422014       |
| Acute anterolateral myocardial infarction                                                 | 455641000006112   | 70211005        | 1233238016      |
| Atrial septal defect as current complication following acute myocardial infarction        | 498031000006112   | 194863005       | 299818010       |
| [X]Subsequent myocardial infarction of unspecified site                                   | 300882013         | 194856005       | 299808017       |
| Reinfarction of myocardium                                                                | 4776171000006116  | 194856005       | 299809013       |
| Postoperative myocardial infarction, unspecified                                          | 455423016         | 129574000       | 208365015       |
| Acute myocardial infarction of diaphragmatic wall                                         | 3699911000006119  | 73795002        | 122559017       |
| Dressler's syndrome                                                                       | 109916013         | 66189004        | 109916013       |
| Post-infarction ventricular septal defect                                                 | 5056501000006113  | 233846000       | 350382012       |
| Anteroseptal infarction on electrocardiogram                                              | 4586111000006115  | 164868007       | 2695135018      |
| Acute subendocardial infarction                                                           | 116992017         | 70422006        | 116992017       |
| ECG: lateral infarction                                                                   | 256459018         | 164871004       | 256459018       |

|                                                                                                                         |                   |                  |                  |
|-------------------------------------------------------------------------------------------------------------------------|-------------------|------------------|------------------|
| Acute myocardial infarction of inferior wall                                                                            | 299714019         | 73795002         | 122557015        |
| Acute myocardial infarction NOS                                                                                         | 299721019         | 57054005         | 94884017         |
| Subsequent myocardial infarction of other sites                                                                         | 299813018         | 194856005        | 299808017        |
| Attack - heart                                                                                                          | 219521000000119   | 22298006         | 37443015         |
| Cardiac rupture due to and following acute myocardial infarction                                                        | 12221301000006119 | 233847009        | 3673284011       |
| NSTEMI - Non-ST segment elevation MI                                                                                    | 6651391000006114  | 401314000        | 1787486017       |
| Hemopericardium as current complication following acute myocardial infarction                                           | 4776221000006110  | 194862000        | 299817017        |
| ECG: antero-septal infarct                                                                                              | 4586151000006119  | 164868007        | 2820892012       |
| Acute septal infarction                                                                                                 | 1234306015        | 79009004         | 1234306015       |
| Acute non-ST segment elevation myocardial infarction                                                                    | 1780501013        | 401314000        | 1780501013       |
| Rupture of cardiac wall without haemopericardium as current complication following acute myocardial infarction          | 158601000006116   | 194865003        | 299821012        |
| Postoperative transmural myocardial infarction of anterior wall                                                         | 212061000006119   | 311792005        | 455418016        |
| Atrial septal defect due to and following acute myocardial infarction                                                   | 12220771000006115 | 194863005        | 3673273016       |
| First myocardial infarction                                                                                             | 6546751000006118  | 394710008        | 1488431012       |
| Anterolateral infarction by EKG                                                                                         | 3202711000006110  | 43630006         | 72749019         |
| Acute anteroapical myocardial infarction                                                                                | 3343471000006116  | 52035003         | 86618010         |
| Non-Q wave myocardial infarction                                                                                        | 6043771000006118  | 314207007        | 458526013        |
| MI - Myocardial infarction aborted                                                                                      | 2619484018        | 194821006        | 2619484018       |
| Haemopericardium as current complication following acute myocardial infarction                                          | 813961000006116   | 194862000        | 299816014        |
| [X]Subsequent myocardial infarction of other sites                                                                      | 300881018         | 194856005        | 299808017        |
| Acute transmural myocardial infarction                                                                                  | 2729671000000118  | 1089471000000109 | 2729671000000118 |
| Postmyocardial infarction pericarditis                                                                                  | 3576391000006116  | 66189004         | 109917016        |
| Cause of Death- Acute Myocardial Infarction                                                                             | 1576301000006115  | 1576301000006104 | 1576301000006115 |
| Haemopericardium due to and following acute myocardial infarction                                                       | 12220761000006110 | 194862000        | 3673282010       |
| Acute inferoposterior infarction                                                                                        | 1234005010        | 76593002         | 1234005010       |
| Coronary thrombosis                                                                                                     | 1786197015        | 398274000        | 1786197015       |
| ECG: myocardial infarction                                                                                              | 256452010         | 164865005        | 256452010        |
| Thrombosis of atrium, auricular appendage, and ventricle as current complications following acute myocardial infarction | 100681000006116   | 194868001        | 299824016        |
| Myocardial Infarction                                                                                                   | 884151000006119   | 57054005         | 884151000006119  |
| Myocardial infarction aborted                                                                                           | 682481000006118   | 194821006        | 2619484018       |
| MI - acute myocardial infarction                                                                                        | 219531000000117   | 57054005         | 94884017         |
| Acute myocardial infarction                                                                                             | 94884017          | 57054005         | 94884017         |
| Myocardial infarction                                                                                                   | 2855301000006112  | 22298006         | 37436014         |
| Microinfarct of heart                                                                                                   | 3185771000006112  | 42531007         | 70952012         |
| [X]Other current complications following acute myocardial infarction                                                    | 408571000006116   | 302049001        | 443587013        |

**Table S33. Myocardial infarction HES (ICD10) codes**

| ICD10 codes | Term                                                                                                                    |
|-------------|-------------------------------------------------------------------------------------------------------------------------|
| I21.0       | Acute transmural myocardial infarction of anterior wall                                                                 |
| I21.1       | Acute transmural myocardial infarction of inferior wall                                                                 |
| I21.2       | Acute transmural myocardial infarction of other sites                                                                   |
| I21.3       | Acute transmural myocardial infarction of unspecified site                                                              |
| I21.4       | Acute subendocardial myocardial infarction                                                                              |
| I21.9       | Acute myocardial infarction, unspecified                                                                                |
| I22.0       | Subsequent myocardial infarction of anterior wall                                                                       |
| I22.1       | Subsequent myocardial infarction of inferior wall                                                                       |
| I22.8       | Subsequent myocardial infarction of other sites                                                                         |
| I22.9       | Subsequent myocardial infarction of unspecified site                                                                    |
| I23.0       | Haemopericardium as current complication following acute myocardial infarction                                          |
| I23.1       | Atrial septal defect as current complication following acute myocardial infarction                                      |
| I23.2       | Ventricular septal defect as current complication following acute myocardial infarction                                 |
| I23.3       | Rupture of cardiac wall without haemopericardium as current complication following acute myocardial infarction          |
| I23.4       | Rupture of chordae tendineae as current complication following acute myocardial infarction                              |
| I23.5       | Rupture of papillary muscle as current complication following acute myocardial infarction                               |
| I23.6       | Thrombosis of atrium, auricular appendage, and ventricle as current complications following acute myocardial infarction |
| I23.8       | Other current complications following acute myocardial infarction                                                       |
| I24.1       | Dressler syndrome                                                                                                       |

**Table S34. Vascular dementia Aurum codes**

| Term                                                                                          | Medcode ID       | SNOMED CT<br>Concept ID | SNOMED CT<br>Description ID |
|-----------------------------------------------------------------------------------------------|------------------|-------------------------|-----------------------------|
| [X]Vascular dementia, unspecified                                                             | 295681016        | 429998004               | 2770951017                  |
| Vascular dementia of acute onset, other symptoms, predominantly hallucinatory                 | 1972521000006114 | 1972521000006105        | 1972521000006114            |
| Subcortical vascular dementia, other symptoms, predominantly depressive                       | 1972771000006116 | 1972771000006100        | 1972771000006116            |
| Mixed cortical and subcortical vascular dementia, other symptoms, predominantly hallucinatory | 1972871000006113 | 1972871000006109        | 1972871000006113            |
| Mixed cortical and subcortical vascular dementia, other symptoms, predominantly depressive    | 1972911000006111 | 1972911000006107        | 1972911000006111            |
| VAD - Vascular dementia                                                                       | 3414251000006112 | 56267009                | 497560014                   |
| Subcortical leukoencephalopathy                                                               | 3964601000006113 | 90099008                | 149344015                   |
| Binswanger's dementia                                                                         | 3964611000006111 | 90099008                | 149345019                   |
| Binswanger's encephalopathy                                                                   | 1235534016       | 90099008                | 1235534016                  |
| Binswanger's disease                                                                          | 149347010        | 90099008                | 149347010                   |
| MID - Multi-infarct dementia                                                                  | 3414231000006117 | 56267009                | 497558012                   |
| Arteriosclerotic dementia NOS                                                                 | 294656010        | 56267009                | 497559016                   |
| Subcortical leukoencephalopathy                                                               | 3964591000006117 | 90099008                | 508841015                   |
| Uncomplicated arteriosclerotic dementia                                                       | 294652012        | 191463004               | 294652012                   |
| Arteriosclerotic dementia with delirium                                                       | 294653019        | 191464005               | 294653019                   |
| Arteriosclerotic dementia with paranoia                                                       | 294654013        | 191465006               | 294654013                   |
| Arteriosclerotic dementia with depression                                                     | 294655014        | 191466007               | 294655014                   |
| Ischaemic vascular dementia                                                                   | 7840631000006118 | 723123001               | 3334662012                  |
| Vascular dementia of acute onset, other symptoms, predominantly delusional                    | 1972501000006116 | 1972501000006100        | 1972501000006116            |
| Other vascular dementia, other symptoms, predominantly depressive                             | 1973381000006112 | 1973381000006108        | 1973381000006112            |
| Vascular dementia, with delirium                                                              | 2664611000006117 | 10349009                | 18021011                    |
| [X]Vascular dementia                                                                          | 431681000006117  | 429998004               | 2770951017                  |
| [X]Vascular dementia of acute onset                                                           | 431691000006119  | 230285003               | 345110014                   |
| Multi infarct dementia                                                                        | 3414261000006114 | 56267009                | 2921000019                  |
| [D] Vascular dementia                                                                         | 914921000006117  | 914921000006101         | 914921000006117             |
| Vascular dementia of acute onset, without additional symptoms                                 | 1972481000006114 | 1972481000006105        | 1972481000006114            |
| Multi-infarct dementia, other symptoms, predominantly delusional                              | 1972621000006113 | 1972621000006109        | 1972621000006113            |
| Multi-infarct dementia, other symptoms, predominantly depressive                              | 1972661000006119 | 1972661000006103        | 1972661000006119            |
| Subcortical vascular dementia, without additional symptoms                                    | 1972711000006113 | 1972711000006109        | 1972711000006113            |
| Subcortical vascular dementia, other symptoms, predominantly delusional                       | 1972731000006119 | 1972731000006103        | 1972731000006119            |
| Other vascular dementia, without additional symptoms                                          | 1973221000006118 | 1973221000006102        | 1973221000006118            |
| Other vascular dementia, other symptoms, predominantly delusional                             | 1973271000006117 | 1973271000006101        | 1973271000006117            |
| Other vascular dementia, other mixed symptoms                                                 | 1973401000006112 | 1973401000006108        | 1973401000006112            |
| Multi infarct dementia                                                                        | 696161000006115  | 56267009                | 93568017                    |
| Vascular dementia of acute onset, other symptoms, predominantly depressive                    | 1972541000006119 | 1972541000006103        | 1972541000006119            |



|                                                                                            |                  |                  |                  |
|--------------------------------------------------------------------------------------------|------------------|------------------|------------------|
| Multi-infarct dementia, without additional symptoms                                        | 1972601000006115 | 1972601000006104 | 1972601000006115 |
| Subcortical vascular dementia, other mixed symptoms                                        | 1972791000006115 | 1972791000006104 | 1972791000006115 |
| Mixed cortical and subcortical vascular dementia, without additional symptoms              | 1972821000006112 | 1972821000006108 | 1972821000006112 |
| Other vascular dementia, other symptoms, predominantly hallucinatory                       | 1973341000006118 | 1973341000006102 | 1973341000006118 |
| Vascular dementia, unspecified, without additional symptoms                                | 1973461000006113 | 1973461000006109 | 1973461000006113 |
| Vascular dementia, unspecified, other symptoms, predominantly hallucinatory                | 1973531000006117 | 1973531000006101 | 1973531000006117 |
| [X]Other vascular dementia                                                                 | 295680015        | 429998004        | 2770951017       |
| [X]Arteriosclerotic dementia                                                               | 363791000006112  | 56267009         | 497559016        |
| Multi-infarct dementia, other symptoms, predominantly hallucinatory                        | 1972641000006118 | 1972641000006102 | 1972641000006118 |
| Multi-infarct dementia, other mixed symptoms                                               | 1972681000006112 | 1972681000006108 | 1972681000006112 |
| Vascular dementia, unspecified, other symptoms, predominantly depressive                   | 1973551000006112 | 1973551000006108 | 1973551000006112 |
| Vascular dementia, unspecified, other mixed symptoms                                       | 1976831000006111 | 1976831000006107 | 1976831000006111 |
| Arteriosclerotic dementia                                                                  | 497559016        | 56267009         | 497559016        |
| Vascular dementia of acute onset, other mixed symptoms                                     | 1972571000006110 | 1972571000006106 | 1972571000006110 |
| Subcortical vascular dementia, other symptoms, predominantly hallucinatory                 | 1972751000006114 | 1972751000006105 | 1972751000006114 |
| Mixed cortical and subcortical vascular dementia, other symptoms, predominantly delusional | 1972831000006110 | 1972831000006106 | 1972831000006110 |
| Mixed cortical and subcortical vascular dementia, other mixed symptoms                     | 1972931000006117 | 1972931000006101 | 1972931000006117 |
| Vascular dementia, unspecified, other symptoms, predominantly delusional                   | 1973501000006113 | 1973501000006109 | 1973501000006113 |
| [X]Mixed cortical and subcortical vascular dementia                                        | 398571000006112  | 230287006        | 345112018        |
| [X]Subcortical vascular dementia                                                           | 428201000006119  | 230286002        | 345111013        |
| [X]Multi-infarct dementia                                                                  | 399031000006111  | 56267009         | 93568017         |
| Subcortical arteriosclerotic encephalopathy                                                | 3964651000006112 | 90099008         | 1235535015       |
| Vascular dementia with behavioral disturbance                                              | 8089241000006117 | 288631000119104  | 3290002019       |

**Table S35. Vascular dementia HES (ICD10) codes**

| ICD10 codes | Term                                             |
|-------------|--------------------------------------------------|
| F01.0       | Vascular dementia of acute onset                 |
| F01.1       | Multi-infarct dementia                           |
| F01.2       | Subcortical vascular dementia                    |
| F01.3       | Mixed cortical and subcortical vascular dementia |
| F01.8       | Other vascular dementia                          |
| F01.9       | Vascular dementia, unspecified                   |

**Table S36. Gastrointestinal bleeding Aurum codes**

| Term                                                                                           | Medcode ID        | SNOMED CT Concept ID | SNOMED CT Description ID |
|------------------------------------------------------------------------------------------------|-------------------|----------------------|--------------------------|
| Gastric ulcer with hemorrhage AND perforation                                                  | 3513611000006117  | 62366003             | 103655018                |
| Haemorrhage of large intestine co-occurrent and due to diverticular disease of large intestine | 11823161000006110 | 197092000            | 3512394014               |
| Bleeding duodenal ulcer                                                                        | 2937141000006110  | 27281001             | 1225269012               |
| DU - acute + h'ge + perf.                                                                      | 885871000006115   | 86895006             | 885871000006115          |
| GU - acute + haemorrhage                                                                       | 885771000006112   | 89748001             | 885771000006112          |
| Bleeding diverticulosis of large intestine                                                     | 11823171000006115 | 197092000            | 3512393015               |
| Bleeding chronic duodenal ulcer                                                                | 1235462014        | 89469000             | 1235462014               |
| DU - acute + haemorrhage                                                                       | 885851000006113   | 12847006             | 885851000006113          |
| Haemorrhagic duodenitis                                                                        | 4058111000006114  | 95531001             | 512171013                |
| Bleeding external hemorrhoids                                                                  | 2923111000006117  | 26421009             | 44253010                 |
| Bleeding internal hemorrhoids                                                                  | 3733941000006117  | 75884004             | 126038015                |
| Vomiting blood - fresh                                                                         | 397912015         | 267051003            | 397912015                |
| Chronic peptic ulcer with hemorrhage                                                           | 3296621000006114  | 49232000             | 82009014                 |
| RB - Rectal bleeding                                                                           | 2692031000006113  | 12063002             | 464498014                |
| GI bleeding                                                                                    | 3710501000006113  | 74474003             | 123689014                |
| Rectal haemorrhage                                                                             | 464500010         | 12063002             | 464500010                |
| Gastric haemorrhage                                                                            | 303660017         | 61401005             | 499003013                |
| Acute peptic ulcer with haemorrhage and perforation                                            | 361430016         | 111353003            | 361430016                |
| Lower GI bleeding                                                                              | 3926401000006112  | 87763006             | 145512011                |
| Vomiting blood - coffee ground                                                                 | 492804019         | 40835002             | 492804019                |
| Haemorrhage of large intestine with diverticular disease of large intestine                    | 11823191000006119 | 197092000            | 3512395010               |
| PU - chronic + h'ge + perf.                                                                    | 886001000006111   | 61300005             | 886001000006111          |
| Chronic peptic ulcer with hemorrhage AND perforation                                           | 3496021000006116  | 61300005             | 101859019                |
| GI - Gastrointestinal hemorrhage                                                               | 3710571000006119  | 74474003             | 1218401013               |
| Chronic gastrojejunal ulcer with hemorrhage AND perforation                                    | 3236981000006112  | 45640006             | 76108010                 |
| Upper GI - gastrointestinal haemorrhage                                                        | 3102201000006117  | 37372002             | 1216567017               |
| Hemorrhage of large intestine co-occurrent and due to diverticular disease of large intestine  | 11823151000006113 | 197092000            | 3512397019               |
| DU - chronic + h'ge + perf.                                                                    | 885911000006117   | 36975000             | 885911000006117          |
| Bleeding gastric ulcer                                                                         | 2752321000006114  | 15902003             | 1221244018               |
| Rectorrhagia                                                                                   | 2691961000006110  | 12063002             | 20789018                 |
| Chronic gastric ulcer with hemorrhage AND with perforation                                     | 3739191000006114  | 76181002             | 126521010                |
| Chronic gastric ulcer with hemorrhage                                                          | 3430281000006116  | 57246001             | 95214011                 |
| Haematemesis                                                                                   | 507679012         | 8765009              | 507679012                |
| Duodenal ulcer with haemorrhage                                                                | 302534015         | 27281001             | 483490017                |
| Oesophageal varices with bleeding in diseases EC                                               | 300776018         | 195475003            | 300776018                |
| Acute upper GI bleeding                                                                        | 3126711000006119  | 38938002             | 65309016                 |
| Unspecified peptic ulcer with haemorrhage and perforation                                      | 302571018         | 13200003             | 22592012                 |

|                                                              |                   |                  |                  |
|--------------------------------------------------------------|-------------------|------------------|------------------|
| Unspecified peptic ulcer with haemorrhage                    | 302568014         | 13200003         | 22592012         |
| Hematoma of perianal region                                  | 7375281000006110  | 449815008        | 2913034013       |
| Rectal bleeding                                              | 20792019          | 12063002         | 20792019         |
| Chronic peptic ulcer with haemorrhage                        | 495344012         | 49232000         | 495344012        |
| Melaena - O/E of faeces                                      | 411734011         | 275782008        | 411734011        |
| Upper GI hemorrhage                                          | 3102171000006116  | 37372002         | 62347019         |
| Bleeding acute gastric ulcer                                 | 1235493010        | 89748001         | 1235493010       |
| Haemorrhage of rectum and anus                               | 396382012         | 266464001        | 396382012        |
| Melena                                                       | 2545151000006112  | 2901004          | 5911019          |
| GU - chronic + h'ge + perf.                                  | 885831000006118   | 76181002         | 885831000006118  |
| GU - chronic + haemorrhage                                   | 885811000006112   | 57246001         | 885811000006112  |
| History of lower GIT haemorrhage                             | 1819591000006117  | 1819591000006101 | 1819591000006117 |
| Gastrooesophageal laceration-hemorrhage syndrome             | 3068381000006113  | 35265002         | 2646918012       |
| PR - Bleeding per rectum                                     | 2692001000006117  | 12063002         | 464495012        |
| Upper GI bleeding                                            | 3102181000006118  | 37372002         | 62348012         |
| Acute gastric ulcer with hemorrhage                          | 3958881000006116  | 89748001         | 148789010        |
| Duodenal ulcer with hemorrhage                               | 11902881000006118 | 27281001         | 45608011         |
| Painless rectal bleeding                                     | 2534250012        | 414992000        | 2534250012       |
| Acute peptic ulcer with haemorrhage                          | 470365013         | 12274003         | 470365013        |
| Rectal hemorrhage                                            | 2692051000006118  | 12063002         | 464501014        |
| Hematemesis                                                  | 2639821000006115  | 8765009          | 15458019         |
| Acute peptic ulcer with hemorrhage and perforation           | 4194481000006117  | 111353003        | 90139013         |
| Rectal packing for hemorrhage                                | 4716091000006113  | 182606003        | 282271018        |
| Chronic gastric ulcer with haemorrhage AND with perforation  | 554311000006114   | 76181002         | 503219010        |
| GI haemorrhage                                               | 3710531000006117  | 74474003         | 502714014        |
| Haemorrhage of rectum and anus NOS                           | 303317017         | 266464001        | 396382012        |
| GI hemorrhage                                                | 3710511000006111  | 74474003         | 123690017        |
| Evacuation of perianal hematoma                              | 5789981000006110  | 293018003        | 433185011        |
| Bleeding hemorrhoid                                          | 3335301000006118  | 51551000         | 1218192016       |
| Melaena on examination of faeces                             | 5576661000006114  | 275782008        | 2771057011       |
| Chronic gastrojejunal ulcer with haemorrhage AND perforation | 494304013         | 45640006         | 494304013        |
| Chronic gastric ulcer with haemorrhage                       | 497833010         | 57246001         | 497833010        |
| Chronic peptic ulcer with haemorrhage AND perforation        | 498977018         | 61300005         | 498977018        |
| Chronic gastrojejunal ulcer with haemorrhage                 | 499386010         | 62838000         | 499386010        |
| Oesophageal varices with haemorrhage                         | 2781041000006115  | 17709002         | 478406011        |
| Gastric hemorrhage                                           | 3497601000006119  | 61401005         | 102007012        |
| Oesophageal haemorrhage                                      | 2741641000006118  | 15238002         | 477249012        |
| Acute duodenal ulcer with hemorrhage AND perforation         | 3912771000006119  | 86895006         | 144111018        |
| Acute duodenal ulcer with hemorrhage                         | 2704011000006118  | 12847006         | 22034017         |
| Haematoma of perianal region                                 | 7375271000006112  | 449815008        | 2912591019       |

|                                                             |                  |           |                  |
|-------------------------------------------------------------|------------------|-----------|------------------|
| Duodenal ulcer with haemorrhage                             | 2937121000006115 | 27281001  | 2937121000006115 |
| Perianal haematoma                                          | 233701000006116  | 449815008 | 2213971000000113 |
| Hemorrhage of rectum and anus                               | 5493021000006119 | 266464001 | 396383019        |
| Unspec gastrojejunal ulcer with haemorrhage and perforation | 81321000006111   | 16121001  | 27283019         |
| Oesophageal bleeding                                        | 2741601000006115 | 15238002  | 477250012        |
| Bleeding from anus                                          | 481141000006114  | 6072007   | 498827015        |
| Internal bleeding haemorrhoids                              | 1216930015       | 75884004  | 1216930015       |
| Unspecified gastrojejunal ulcer with haemorrhage            | 302606019        | 16121001  | 27283019         |
| Unspecified gastric ulcer with haemorrhage and perforation  | 302490012        | 62366003  | 499256017        |
| Acute gastric ulcer with bleeding                           | 3958891000006118 | 89748001  | 148790018        |
| Melena on examination of feces                              | 5576651000006112 | 275782008 | 2770255015       |
| Melaena                                                     | 5913016          | 2901004   | 5913016          |
| Acute gastrojejunal ulcer with haemorrhage                  | 499719010        | 63954007  | 499719010        |
| Melena - O/E of feces                                       | 5576641000006110 | 275782008 | 411735012        |
| Chronic gastrojejunal ulcer with hemorrhage                 | 3521501000006114 | 62838000  | 104433010        |
| Gastric bleeding                                            | 3497621000006112 | 61401005  | 102011018        |
| Anal/rectal haemorrhage                                     | 886471000006110  | 266464001 | 886471000006110  |
| PU - acute + haemorrhage                                    | 885941000006118  | 12274003  | 885941000006118  |
| Gastric ulcer with hemorrhage                               | 2752311000006118 | 15902003  | 26937011         |
| Internal bleeding hemorrhoids                               | 3733961000006118 | 75884004  | 1218417019       |
| Upper GI - gastrointestinal hemorrhage                      | 3102211000006119 | 37372002  | 1218058016       |
| Bleeding pile                                               | 3335311000006115 | 51551000  | 1230996010       |
| Unspecified duodenal ulcer with haemorrhage and perforation | 302537010        | 51868009  | 86362013         |
| GI - Gastrointestinal haemorrhage                           | 3710541000006110 | 74474003  | 1216914011       |
| Bleeding hemorrhoids                                        | 3335281000006117 | 51551000  | 85856015         |
| Bleeding per rectum                                         | 515491000006115  | 12063002  | 464494011        |
| Anal margin haematoma                                       | 5585681000006116 | 276465001 | 412609016        |
| Peptic ulcer with haemorrhage                               | 3542811000006116 | 64121000  | 499762011        |
| Esophageal varices with hemorrhage                          | 2781031000006113 | 17709002  | 29938017         |
| Chronic duodenal ulcer with hemorrhage AND perforation      | 3095701000006110 | 36975000  | 61676011         |
| Acute duodenal ulcer with haemorrhage                       | 474430017        | 12847006  | 474430017        |
| Acute haemorrhagic gastritis                                | 478553011        | 2367005   | 481682019        |
| Chronic duodenal ulcer with haemorrhage                     | 508524014        | 89469000  | 508524014        |
| Esophageal bleeding                                         | 2741651000006116 | 15238002  | 477251011        |
| PU - acute + h'ge + perf.                                   | 885961000006119  | 111353003 | 885961000006119  |
| Upper GI haemorrhage                                        | 3102191000006115 | 37372002  | 486703016        |
| H/O: upper GIT hemorrhage                                   | 6017191000006116 | 312489007 | 456219016        |
| PU - acute + perforation                                    | 885951000006116  | 79118000  | 885951000006116  |
| Proctorrhagia                                               | 2691971000006115 | 12063002  | 20790010         |
| Gastroesophageal laceration-hemorrhage syndrome             | 3068351000006117 | 35265002  | 58844012         |

|                                                                            |                   |               |                  |
|----------------------------------------------------------------------------|-------------------|---------------|------------------|
| Unspec peptic ulcer; unspec haemorrhage and/or perforation                 | 81501000006111    | 13200003      | 22592012         |
| Unspec gastrojejunal ulcer; unspec haemorrhage/perforation                 | 81331000006114    | 16121001      | 27283019         |
| Lower GI hemorrhage                                                        | 3926391000006110  | 87763006      | 145511016        |
| Lower GI haemorrhage                                                       | 3926411000006110  | 87763006      | 507737011        |
| Perianal haematoma                                                         | 483207010         | 237331002     | 355700019        |
| Bleeding internal haemorrhoids                                             | 3733931000006110  | 75884004      | 200553019        |
| Acute duodenal ulcer with haemorrhage AND perforation                      | 507303017         | 86895006      | 507303017        |
| Gastric hemorrhage due to erosive gastritis                                | 7987031000006110  | 7071000119102 | 3015365015       |
| Chronic duodenal ulcer with hemorrhage                                     | 3954241000006119  | 89469000      | 148344012        |
| Haemorrhage of oesophagus                                                  | 477248016         | 15238002      | 477248016        |
| Gastrotomy and ligation of bleeding point of stomach                       | 269184010         | 173778009     | 269184010        |
| Chronic duodenal ulcer with haemorrhage AND perforation                    | 486596015         | 36975000      | 486596015        |
| Acute peptic ulcer with hemorrhage                                         | 2695521000006113  | 12274003      | 21136016         |
| GU - acute + perforation                                                   | 885781000006110   | 19850005      | 885781000006110  |
| Rectal packing for haemorrhage                                             | 4716081000006110  | 182606003     | 282269018        |
| BOV - Bleeding oesophageal varices                                         | 2781061000006116  | 17709002      | 1216061014       |
| Perianal haematoma                                                         | 1757561000000116  | 449815008     | 2213971000000113 |
| Bleeding external haemorrhoids                                             | 2923101000006115  | 26421009      | 196528011        |
| Esophageal hemorrhage                                                      | 2741621000006113  | 15238002      | 25860014         |
| Bleeding esophageal varices                                                | 2781021000006110  | 17709002      | 29937010         |
| Unspec duodenal ulcer; unspec haemorrhage and/or perforation               | 81301000006118    | 51868009      | 86362013         |
| Acute gastrojejunal ulcer with haemorrhage AND perforation                 | 504674011         | 81387001      | 504674011        |
| H/O: upper GIT haemorrhage                                                 | 456217019         | 312489007     | 456217019        |
| Acute gastric ulcer with hemorrhage AND perforation                        | 3292411000006119  | 48974009      | 81590012         |
| PRB - Rectal bleeding                                                      | 464499018         | 12063002      | 464499018        |
| Gastric ulcer with haemorrhage AND perforation                             | 81311000006115    | 62366003      | 499256017        |
| Bleeding oesophageal varices                                               | 2781011000006119  | 17709002      | 478405010        |
| Acute hemorrhagic gastritis                                                | 2536601000006112  | 2367005       | 5056011          |
| Esophageal varices with bleeding, associated with another disorder         | 4779741000006118  | 195475003     | 2575714018       |
| Gastric ulcer with haemorrhage                                             | 302487018         | 15902003      | 477573015        |
| Bloody diarrhoea                                                           | 1566381000006119  | 95545007      | 201773015        |
| Perinatal gastrointestinal haemorrhage                                     | 495197011         | 48729005      | 495197011        |
| Acute gastrojejunal ulcer with hemorrhage                                  | 3539941000006116  | 63954007      | 106302011        |
| Bleeding diverticulosis                                                    | 303134017         | 197092000     | 303134017        |
| Hemorrhage of large intestine with diverticular disease of large intestine | 11823181000006117 | 197092000     | 3512398012       |
| Acute gastric ulcer with haemorrhage                                       | 508664015         | 89748001      | 508664015        |
| Bleeding ulcer                                                             | 3393951000006114  | 55075001      | 91564012         |
| Bleeding chronic gastric ulcer                                             | 1231704018        | 57246001      | 1231704018       |
| Bleeding oesophageal ulcer                                                 | 3438321000006112  | 57748001      | 3027281014       |

|                                                                     |                  |                  |                  |
|---------------------------------------------------------------------|------------------|------------------|------------------|
| Vomiting of blood                                                   | 2639831000006117 | 8765009          | 15459010         |
| External bleeding hemorrhoids                                       | 2923131000006111 | 26421009         | 1217729010       |
| Bleeding haemorrhoid                                                | 3335291000006119 | 51551000         | 1216702010       |
| GU - acute + h'ge + perf.                                           | 885791000006113  | 48974009         | 885791000006113  |
| DU - acute + perforation                                            | 885861000006110  | 61347001         | 885861000006110  |
| PU - chronic + haemorrhage                                          | 885981000006112  | 49232000         | 885981000006112  |
| DU - chronic + haemorrhage                                          | 885891000006119  | 89469000         | 885891000006119  |
| PR - Blood per rectum                                               | 2692021000006110 | 12063002         | 464497016        |
| Vomiting blood                                                      | 15459010         | 8765009          | 507678016        |
| Blood per rectum                                                    | 2692011000006119 | 12063002         | 464496013        |
| Painful rectal bleeding                                             | 2534219010       | 414991007        | 2534219010       |
| BOV - Bleeding esophageal varices                                   | 2781081000006114 | 17709002         | 1217568017       |
| Manchester triage - GI bleeding                                     | 1984161000006112 | 1984161000006108 | 1984161000006112 |
| Oesophageal varices with bleeding, associated with another disorder | 4779721000006113 | 195475003        | 2575715017       |
| Esophageal varices with bleeding                                    | 2781071000006111 | 17709002         | 1217567010       |
| Acute gastrojejunal ulcer with hemorrhage AND perforation           | 3823411000006113 | 81387001         | 135007015        |
| Perianal hematoma                                                   | 1988561000006114 | 449815008        | 2213971000000113 |
| Oesophageal varices with bleeding                                   | 1216060010       | 17709002         | 1216060010       |
| Acute gastric ulcer with haemorrhage AND perforation                | 495273013        | 48974009         | 495273013        |
| Intestinal haemorrhage NOS                                          | 303663015        | 74474003         | 123688018        |
| Hemorrhage of esophagus                                             | 2741611000006117 | 15238002         | 25859016         |
| Gastro-oesophageal laceration-haemorrhage syndrome                  | 3068361000006115 | 35265002         | 1216440014       |
| Bleeding haemorrhoids                                               | 300752014        | 51551000         | 198339016        |
| Acute lower GI bleeding                                             | 3890061000006117 | 85521005         | 141749014        |

**Table S37. Gastrointestinal bleeding HES (ICD10) codes**

| ICD10 codes | Term                                                                                         |
|-------------|----------------------------------------------------------------------------------------------|
| I85.0       | Oesophageal varices with bleeding                                                            |
| I98.3       | Oesophageal varices with bleeding in diseases classified elsewhere                           |
| K22.6       | Gastro-oesophageal laceration-haemorrhage syndrome                                           |
| K25.0       | Gastric ulcer. Acute with haemorrhage                                                        |
| K25.2       | Gastric ulcer. Acute with both haemorrhage and perforation                                   |
| K25.4       | Gastric ulcer. Chronic or unspecified with haemorrhage                                       |
| K25.6       | Gastric ulcer. Chronic or unspecified with both haemorrhage and perforation                  |
| K26.0       | Duodenal ulcer. Acute with haemorrhage                                                       |
| K26.2       | Duodenal ulcer. Acute with both haemorrhage and perforation                                  |
| K26.4       | Duodenal ulcer. Chronic or unspecified with haemorrhage                                      |
| K26.6       | Duodenal ulcer. Chronic or unspecified with both haemorrhage and perforation                 |
| K27.0       | Peptic ulcer, site unspecified. Acute with haemorrhage                                       |
| K27.2       | Peptic ulcer, site unspecified. Acute with both haemorrhage and perforation                  |
| K27.4       | Peptic ulcer, site unspecified. Chronic or unspecified with haemorrhage                      |
| K27.6       | Peptic ulcer, site unspecified. Chronic or unspecified with both haemorrhage and perforation |
| K28.0       | Gastrojejunal ulcer. Acute with haemorrhage                                                  |
| K28.2       | Gastrojejunal ulcer. Acute with both haemorrhage and perforation                             |
| K28.4       | Gastrojejunal ulcer. Chronic or unspecified with haemorrhage                                 |
| K28.6       | Gastrojejunal ulcer. Chronic or unspecified with both haemorrhage and perforation            |
| K29.0       | Acute haemorrhagic gastritis                                                                 |
| K62.5       | Haemorrhage of anus and rectum                                                               |
| K66.1       | Haemoperitoneum                                                                              |
| K92.0       | Haematemesis                                                                                 |
| K92.1       | Melaena                                                                                      |
| K92.2       | Gastrointestinal haemorrhage, unspecified                                                    |



**Table S38. Bleeding at other anatomy sites Aurum codes**

| Term                                                               | Medcode ID       | SNOMED CT<br>Concept ID | SNOMED CT<br>Description ID |
|--------------------------------------------------------------------|------------------|-------------------------|-----------------------------|
| Bleeding from nose                                                 | 5270631000006113 | 249366005               | 5270631000006113            |
| O/E - retinal microaneurysms                                       | 255335015        | 163986001               | 255335015                   |
| Nontraumatic scrotal hematoma                                      | 4790941000006116 | 198058000               | 3036672010                  |
| Bleeding into joint                                                | 3830271000006111 | 81808003                | 1234640010                  |
| Drainage of haematoma of pinna and insertion of<br>bolster sutures | 4650061000006119 | 172619007               | 267229016                   |
| Control of hemorrhage                                              | 3330351000006114 | 51241000                | 85365019                    |
| Haemarthrosis of PIP joint of finger                               | 310710010        | 202409003               | 310710010                   |
| Haemarthrosis of wrist                                             | 310705011        | 202407001               | 310705011                   |
| Haemarthrosis of the ankle                                         | 310724014        | 202415003               | 310724014                   |
| Primary post tonsillectomy hemorrhage                              | 6046521000006116 | 314483007               | 458849015                   |
| Injury of heart with haemopericardium                              | 320982018        | 210078001               | 320982018                   |
| Subungual haemorrhage                                              | 5125561000006112 | 238722001               | 357791012                   |
| Postcoital bleeding                                                | 81454015         | 48880000                | 81454015                    |
| Pelvic haematoma                                                   | 5477481000006114 | 264558008               | 393037010                   |
| Corneal haemorrhage                                                | 5029211000006119 | 231916005               | 347513015                   |
| Bleeding stoma                                                     | 353962019        | 236129005               | 353962019                   |
| Acute posthaemorrhagic anaemia                                     | 399228011        | 267530009               | 399228011                   |
| Vitreous hemorrhage                                                | 3005171000006115 | 31341008                | 52406015                    |
| Hematoma of pinna                                                  | 3930851000006114 | 88050005                | 145963019                   |
| Haematoma of lower leg                                             | 7373861000006119 | 449704006               | 2912608014                  |
| Bleeding in mouth                                                  | 2858361000006116 | 22490002                | 481357012                   |
| Haematoma of tongue                                                | 5455391000006110 | 262651006               | 390627015                   |
| Extradural haematoma                                               | 7085881000006119 | 428268007               | 2899390010                  |
| Retinal blot haemorrhage                                           | 5239831000006118 | 247133006               | 2619788016                  |
| Haematoma of penis                                                 | 5681941000006113 | 283948004               | 422520011                   |
| Perioperative haemorrhage                                          | 3636041019       | 762957002               | 3636041019                  |
| Persistent haematuria                                              | 5656871000006111 | 281859000               | 419988013                   |
| Corpus cavernosum haematoma                                        | 304493010        | 198031007               | 304493010                   |
| Thyroid hemorrhage and infarction                                  | 4757961000006112 | 190305000               | 292442019                   |
| Subretinal haemorrhage                                             | 475607010        | 13937002                | 475607010                   |
| Corpus cavernosum haemorrhage                                      | 1216873013       | 69452005                | 1216873013                  |
| Scrotal haemorrhage                                                | 1216798017       | 62182006                | 1216798017                  |
| Bleeding tooth socket                                              | 5700021000006118 | 285335006               | 424307013                   |
| Retinal hemorrhages                                                | 2966421000006119 | 28998008                | 1217788016                  |
| Massive haemoptysis                                                | 2229721000000116 | 862231000000103         | 2229721000000116            |
| Head injury with haemorrhage from nose                             | 4395871000006112 | 127276009               | 474087019                   |
| Spontaneous intraperitoneal hemorrhage                             | 3236641000006110 | 45626005                | 76080019                    |
| Deformity/haematoma of pinna                                       | 883651000006111  | 286943000               | 883651000006111             |
| Nontraumatic haemoperitoneum                                       | 3236611000006111 | 45626005                | 2816649012                  |

|                                                                                                                       |                  |                 |                  |
|-----------------------------------------------------------------------------------------------------------------------|------------------|-----------------|------------------|
| Reopening of chest and re-exploration of intra-abdominal operation site and surgical arrest of postoperative bleeding | 4679481000006110 | 177768005       | 275176015        |
| Nipple bleeding                                                                                                       | 5755901000006111 | 290103001       | 430097013        |
| Contact bleeding                                                                                                      | 5103751000006111 | 237133008       | 355447012        |
| Haematoma of thigh                                                                                                    | 5967731000006111 | 307391000       | 450646011        |
| Moderate vaginal bleeding                                                                                             | 5748541000006110 | 289539007       | 429439016        |
| Extradural hemorrhage                                                                                                 | 3850511000006116 | 82999001        | 137670017        |
| On examination - epistaxis                                                                                            | 4576361000006110 | 164187003       | 4576361000006110 |
| Intraperitoneal haematoma                                                                                             | 5088411000006117 | 236000006       | 353764011        |
| External capsule haemorrhage                                                                                          | 300276019        | 195167002       | 300276019        |
| Haemophthalmos, except current injury                                                                                 | 4771081000006111 | 193287005       | 2550868017       |
| Haemorrhage from pharynx                                                                                              | 6119831000006110 | 324618004       | 465452016        |
| Liver hematoma                                                                                                        | 5457191000006118 | 262796008       | 390818018        |
| Subungual haematoma, hand                                                                                             | 5561121000006110 | 274202000       | 409975019        |
| Expulsive haemorrhage                                                                                                 | 2684991000006115 | 11623000        | 2474957017       |
| Hemopneumothorax                                                                                                      | 2763811000006111 | 16632002        | 28149019         |
| History of abnormal uterine bleeding                                                                                  | 5497401000006114 | 267016006       | 2986860010       |
| History of epistaxis                                                                                                  | 1137551000000110 | 511511000000101 | 1137551000000110 |
| Hematoma of spleen                                                                                                    | 5457481000006111 | 262818004       | 390852015        |
| Non-traumatic testicular haematoma                                                                                    | 3074001000006117 | 35644004        | 1216444017       |
| Deep intra-retinal hemorrhages                                                                                        | 3288931000006115 | 48742005        | 1490493013       |
| Wrist haemarthrosis                                                                                                   | 310706012        | 202407001       | 310706012        |
| Elbow haemarthrosis                                                                                                   | 310700018        | 202405009       | 310700018        |
| Spontaneous intraperitoneal haemorrhage                                                                               | 3236701000006118 | 45626005        | 494285013        |
| Traumatic haematuria                                                                                                  | 512189014        | 95567008        | 512189014        |
| Optic nerve sheath hemorrhage                                                                                         | 2729121000006117 | 14460007        | 1217537016       |
| Adrenocortical haemorrhage                                                                                            | 356328018        | 237766002       | 356328018        |
| Haemarthrosis of DIP joint of finger                                                                                  | 310711014        | 202410008       | 310711014        |
| Liposuction removal of haematoma                                                                                      | 275087014        | 177714000       | 275087014        |
| Haemorrhage                                                                                                           | 3325451000006112 | 50960005        | 495845019        |
| Bleeding skin                                                                                                         | 5846621000006115 | 297968009       | 438563011        |
| Bleeding gums                                                                                                         | 143080016        | 86276007        | 143080016        |
| Infected haematoma                                                                                                    | 7510021000006118 | 698573001       | 2974732011       |
| Hemarthrosis of wrist                                                                                                 | 4813321000006115 | 202407001       | 310703016        |
| Haemorrhage of cervix                                                                                                 | 504705015        | 81488005        | 504705015        |
| External bleeding haemorrhoids                                                                                        | 1216226011       | 26421009        | 1216226011       |
| H/O: haematuria                                                                                                       | 251768018        | 161550001       | 251768018        |
| Haematoma of kidney                                                                                                   | 5458501000006117 | 262891006       | 390956018        |
| O/E - vitreous hemorrhages                                                                                            | 4573231000006119 | 163990004       | 255340011        |
| Evacuation of haematoma from vagina                                                                                   | 649591000006116  | 392256003       | 1490236018       |
| Bleeding                                                                                                              | 4454741000006110 | 131148009       | 210860014        |
| Haemarthrosis of multiple sites                                                                                       | 812741000006113  | 76427005        | 503277015        |

|                                                |                  |           |                 |
|------------------------------------------------|------------------|-----------|-----------------|
| Haematoma - postoperative                      | 813261000006113  | 213262007 | 325137018       |
| On examination - subconjunctival hemorrhage    | 4552921000006116 | 162815002 | 2667822015      |
| Haematoma of temporal region                   | 5965691000006113 | 307214007 | 450417012       |
| Bleeding varices                               | 3427151000006119 | 57052009  | 94882018        |
| Vulval haematoma evacuated                     | 869431000006119  | 65687007  | 869431000006119 |
| PU - chronic + haemorrhage                     | 885981000006112  | 49232000  | 885981000006112 |
| Bleeding of ear canal                          | 5875341000006114 | 300129004 | 441138011       |
| Haemarthrosis - hand joint                     | 890591000006112  | 27507004  | 890591000006112 |
| Optic disc haemorrhage                         | 5241101000006119 | 247233000 | 369184014       |
| Vulval hematoma                                | 3628381000006110 | 69385001  | 1218357015      |
| Blood in anterior chamber                      | 3723211000006110 | 75229002  | 1233846014      |
| Normocytic anemia following acute bleed        | 5914361000006111 | 303060002 | 445120015       |
| Breast hematoma                                | 5913301000006112 | 302924003 | 444948013       |
| Corpus cavernosum hematoma                     | 4790761000006115 | 198031007 | 304492017       |
| Fresh bleeding from vagina                     | 5748511000006111 | 289536000 | 429436011       |
| Hemorrhage of cervix                           | 3825061000006115 | 81488005  | 135183016       |
| Scrotal hemorrhage                             | 3510231000006116 | 62182006  | 1218286015      |
| Bleeding haemorrhoid                           | 3335291000006119 | 51551000  | 1216702010      |
| Hemarthrosis of glenohumeral joint             | 7529911000006111 | 700018009 | 2987396013      |
| Perineal hematoma                              | 5105871000006114 | 237331002 | 355701015       |
| Haemophthalmos without current injury          | 4771041000006117 | 193287005 | 2547718010      |
| Hemarthrosis of acromioclavicular joint        | 4813241000006115 | 202404008 | 310696014       |
| Haemorrhage of testis                          | 3764241000006119 | 77708008  | 503651019       |
| O/E - subconjunctival hemorrhage               | 4552911000006112 | 162815002 | 253782010       |
| Hemorrhage of scrotum                          | 3510211000006110 | 62182006  | 103341016       |
| Evacuation of intracranial subdural hematoma   | 3469871000006118 | 59712006  | 498517019       |
| Hemarthrosis of MCP joint                      | 4813361000006114 | 202408006 | 310708013       |
| Hemorrhage in optic nerve sheaths              | 2729081000006119 | 14460007  | 24578017        |
| Acute hemorrhagic pancreatitis                 | 2568871000006112 | 4399003   | 7699015         |
| Retrohyaloid haemorrhage                       | 2683851000006119 | 11547003  | 411994019       |
| Nontraumatic scrotal haematoma                 | 4790951000006119 | 198058000 | 3036831010      |
| Evacuation of intracerebral hematoma           | 2666411000006111 | 10458001  | 18195013        |
| Haemorrhage in optic nerve sheaths             | 2729071000006117 | 14460007  | 476340016       |
| Paroxysmal hematoma of the finger              | 5126821000006110 | 238824006 | 357937018       |
| Nontraumatic hematoma of testis                | 3073991000006114 | 35644004  | 59462016        |
| Hematoma                                       | 3073011000006117 | 35566002  | 59338013        |
| Haemarthrosis of sternoclavicular joint        | 310694012        | 202403002 | 310694012       |
| Haemarthrosis of hip                           | 310715017        | 202411007 | 310715017       |
| Haemarthrosis of metacarpophalangeal joint     | 4813371000006119 | 202408006 | 2692465010      |
| Surgical arrest of bleeding from internal nose | 267550012        | 172811007 | 267550012       |
| Perineal haematoma                             | 355700019        | 237331002 | 355700019       |
| Haemarthrosis of acromioclavicular joint       | 310695013        | 202404008 | 310695013       |

|                                                         |                   |           |            |
|---------------------------------------------------------|-------------------|-----------|------------|
| Peri-operative haemorrhage or haematoma                 | 403111013         | 269302003 | 403111013  |
| Thyroid haemorrhage and infarction                      | 292443012         | 190305000 | 292443012  |
| Haemorrhagic disorder due to circulating anticoagulants | 294307015         | 191287000 | 294307015  |
| Exophthalmos due to orbital haemorrhage                 | 298692016         | 194016009 | 298692016  |
| Tonsillar haemorrhage                                   | 5036181000006114  | 232425007 | 348218013  |
| Haematemesis - cause unknown                            | 5983251000006115  | 308904008 | 452291015  |
| Vaginal bleeding problem                                | 5748581000006116  | 289543006 | 429444011  |
| Haematoma of groin                                      | 5967711000006117  | 307390004 | 450644014  |
| Anticoagulant-induced bleeding                          | 5612371000006113  | 278365007 | 415242016  |
| Traumatic haematoma                                     | 409951019         | 274179004 | 409951019  |
| Adrenal haemorrhage                                     | 495316011         | 49111001  | 495316011  |
| Thyroid haemorrhage                                     | 1216311012        | 3002002   | 1216311012 |
| Haemorrhage of eyelid                                   | 105913010         | 63720000  | 105913010  |
| Intracranial hematoma following injury                  | 3111241000006113  | 37955001  | 63313013   |
| Haematoma of lower limb                                 | 7373841000006118  | 449703000 | 2912531016 |
| Intraocular hemorrhage                                  | 4021591000006119  | 93478000  | 154753016  |
| Hemorrhagic detachment of retinal pigment epithelium    | 3312501000006111  | 50165004  | 83560014   |
| Haematoma of scrotum                                    | 3962411000006116  | 89966002  | 508761019  |
| Dissection of carotid artery                            | 7806271000006110  | 720626009 | 3441846017 |
| Orbital haemorrhage                                     | 3000741000006117  | 31056006  | 484766013  |
| Postoperative wound hemorrhage                          | 7510191000006115  | 698584008 | 2974777013 |
| Haematoma with intact skin                              | 5518251000006117  | 270911002 | 405394012  |
| Flame-shaped haemorrhage                                | 12222161000006112 | 247132001 | 3644832012 |
| Respiratory tract haemorrhage                           | 317993018         | 95431003  | 512121010  |
| Upper urinary tract haematuria                          | 5097861000006116  | 236717007 | 354811014  |
| Haemarthrosis of distal interphalangeal joint of finger | 4813431000006112  | 202410008 | 2695357016 |
| Nasal septal haematoma                                  | 5035491000006111  | 232377002 | 348145019  |
| Respiratory tract hemorrhage                            | 4056521000006113  | 95431003  | 158078018  |
| Nontraumatic extradural intracranial haemorrhage        | 6593151000006119  | 397809001 | 2916444013 |
| Vaginal hematoma                                        | 3362091000006111  | 53162000  | 88426019   |
| Wrist hemarthrosis                                      | 4813331000006117  | 202407001 | 310704010  |
| Hemorrhage of thyroid                                   | 2547001000006117  | 3002002   | 6091011    |
| Postoperative hemorrhage                                | 4177071000006111  | 110265006 | 175034010  |
| Hyphema                                                 | 3723181000006111  | 75229002  | 124940012  |
| Suture of nose for epistaxis                            | 5724391000006117  | 287400009 | 2988047014 |
| O/E - epistaxis                                         | 11905171000006116 | 164187003 | 255582011  |
| Nontraumatic epidural haemorrhage                       | 6593121000006111  | 397809001 | 1783616016 |
| On examination epistaxis                                | 11873291000006112 | 164187003 | 3634839017 |
| Retinal blot hemorrhages                                | 3288921000006118  | 48742005  | 1490492015 |
| Evacuation of haematoma of vulva                        | 3568141000006115  | 65687007  | 500187011  |
| Retrobulbar haematoma                                   | 4774401000006112  | 194179009 | 298915016  |

|                                                    |                   |                  |                  |
|----------------------------------------------------|-------------------|------------------|------------------|
| Hemarthrosis of hip                                | 4813471000006110  | 202411007        | 310713012        |
| Extradural haemorrhage after injury                | 5459181000006112  | 262949005        | 391029012        |
| Vulval haematoma                                   | 3628371000006112  | 69385001         | 1216870011       |
| Haematuria associated with urinary catheter        | 1938771000006116  | 1938771000006100 | 1938771000006116 |
| Macroscopic haematuria                             | 4790361000006116  | 197941005        | 304354019        |
| O/E - throat haemorrhage                           | 255708010         | 164279008        | 255708010        |
| Epistaxis control -cryosurgery                     | 860731000006118   | 287393001        | 860731000006118  |
| O/E - retinal hemorrhages                          | 4573161000006116  | 163987005        | 255336019        |
| Bleeding                                           | 3325491000006118  | 50960005         | 84923010         |
| Bleeding cervix                                    | 5751971000006119  | 289799006        | 429729011        |
| Subungual haematoma                                | 403014019         | 269219004        | 403014019        |
| Haemorrhage of parathyroid                         | 292686019         | 190460008        | 292686019        |
| Haematoma                                          | 3073001000006115  | 35566002         | 486214017        |
| Intraabdominal hemorrhage                          | 7283681000006111  | 443826006        | 2841291010       |
| Haematoma of abdominal wall                        | 7334721000006118  | 447096000        | 2883375018       |
| Wound haemorrhage                                  | 5131561000006112  | 239161005        | 358453011        |
| Surgical arrest of post-extraction haemorrhage     | 1006061000006112  | 1006061000006108 | 1006061000006112 |
| Retinal pigment epithelium haemorrhagic detachment | 1216693019        | 50165004         | 1216693019       |
| Intraoperative haemorrhage                         | 744731000006115   | 213261000        | 325136010        |
| Retinal haemorrhages                               | 814181000006113   | 28998008         | 1216289019       |
| Haematoma of broad ligament                        | 813321000006114   | 83294006         | 505536016        |
| Hemorrhage postprocedure                           | 4177101000006118  | 110265006        | 348212014        |
| Bleeding from vagina                               | 1786762014        | 289530006        | 2670003011       |
| Chronic hemorrhagic anemia                         | 6842811000006111  | 413533008        | 2536841015       |
| Haemarthrosis - ankle/foot                         | 890621000006114   | 267948008        | 890621000006114  |
| Haemarthrosis - hip joint                          | 890601000006116   | 202411007        | 890601000006116  |
| Vaginal vault haematoma                            | 5103381000006119  | 237102006        | 355396015        |
| Hemarthrosis of subtalar joint                     | 4813591000006110  | 202416002        | 310726011        |
| Surgical arrest of post-extraction hemorrhage      | 4654761000006111  | 173330006        | 268350014        |
| Posttonsillectomy bleeding                         | 8015351000006113  | 35101000119106   | 3306550017       |
| Blood in urine - haematuria                        | 518011000006114   | 53298000         | 1216720018       |
| Pulmonary haemorrhage with glomerulonephritis      | 3319101000006111  | 50581000         | 495714011        |
| Male haematocele                                   | 3577551000006116  | 66259004         | 500367016        |
| Hemorrhage from ureter                             | 5096521000006110  | 236606001        | 354659012        |
| Non-traumatic testicular hematoma                  | 3074011000006119  | 35644004         | 1217934015       |
| Evacuation of vulval haematoma                     | 3568161000006116  | 65687007         | 1216830016       |
| Subconjunctival haemorrhage of both eyes           | 8110661000006118  | 343341000119108  | 3427632015       |
| Deep retinal hemorrhage                            | 3288871000006111  | 48742005         | 81229018         |
| Pulmonary hemorrhage                               | 11989391000006117 | 78144005         | 301491000006118  |
| Dot AND blot hemorrhage                            | 3288881000006114  | 48742005         | 81231010         |
| Haemorrhage postprocedure                          | 4177091000006112  | 110265006        | 348211019        |
| Nontraumatic haematoma of breast                   | 4791291000006110  | 198123000        | 2619486016       |

|                                                                   |                   |                  |                  |
|-------------------------------------------------------------------|-------------------|------------------|------------------|
| Liver haematoma                                                   | 5457181000006116  | 262796008        | 5457181000006116 |
| Pharyngeal hemorrhage                                             | 11905801000006118 | 324618004        | 465449012        |
| Hematoma of vulva                                                 | 3628361000006117  | 69385001         | 115258016        |
| Haemorrhage of prostate                                           | 3223401000006119  | 44843000         | 494041015        |
| Haemopericardium due to and following acute myocardial infarction | 12220761000006110 | 194862000        | 3673282010       |
| Hemorrhage at vitreoretinal interface                             | 5239141000006115  | 247097006        | 369011013        |
| Bleeding reduction: nasal                                         | 3076691000006114  | 35807001         | 1490745018       |
| Expulsive choroidal hemorrhage                                    | 2684981000006118  | 11623000         | 20081013         |
| Extradural haemorrhage                                            | 884431000006116   | 397809001        | 884431000006116  |
| Manchester triage - PV bleeding                                   | 1984281000006110  | 1984281000006106 | 1984281000006110 |
| Pleural haemorrhage                                               | 3013671000006111  | 31892009         | 485062013        |
| Haemorrhage control                                               | 3330361000006111  | 51241000         | 1490265012       |
| Hemarthrosis of first metatarsophalangeal joint                   | 4813651000006115  | 202419009        | 2692707015       |
| Hemorrhage from the ear                                           | 2921441000006110  | 26322001         | 44087014         |
| Evacuation of hematoma of vagina                                  | 6531331000006119  | 392256003        | 1477262019       |
| Abnormal vaginal bleeding                                         | 456808010         | 301822002        | 443305015        |
| [D]Cough with haemorrhage                                         | 317408012         | 66857006         | 500542015        |
| O/E - bleeding gums                                               | 254280011         | 163164001        | 254280011        |
| Perinephric haematoma                                             | 4789661000006116  | 197824007        | 304163014        |
| Haemarthrosis of elbow                                            | 310699019         | 202405009        | 310699019        |
| Hemarthrosis of PIP joint of finger                               | 4813401000006116  | 202409003        | 310709017        |
| Haematoma of occipital scalp                                      | 7097721000006119  | 429059007        | 2694431010       |
| Hemarthrosis of knee                                              | 4813531000006111  | 202413005        | 310719011        |
| Urethral bleeding                                                 | 371989018         | 249301002        | 371989018        |
| Nontraumatic breast haematoma                                     | 4791311000006114  | 198123000        | 3012832013       |
| Bleeding from tonsillar bed                                       | 5271551000006114  | 249423002        | 372151014        |
| Ecchymosis of eyelid                                              | 7002461000006117  | 423145008        | 2644948013       |
| Hyphaema                                                          | 124942016         | 75229002         | 124942016        |
| Incision and drainage of haematoma                                | 7276661000006117  | 443385002        | 2838330015       |
| Bleeding in mouth and/or pharynx                                  | 5271471000006115  | 249417007        | 1489865014       |
| Post-surgical epistaxis                                           | 5035211000006119  | 232357009        | 348118015        |
| Haemarthrosis of hand                                             | 812861000006119   | 27507004         | 483566016        |
| Postoperative haemorrhage control                                 | 5564161000006119  | 274508002        | 410324010        |
| Liposuction removal of hematoma                                   | 4679251000006115  | 177714000        | 275086017        |
| Haemorrhagic choroidal detachment                                 | 479008012         | 19031009         | 479008012        |
| Superficial retinal haemorrhage                                   | 499542018         | 63297008         | 499542018        |
| Haematoma of pinna                                                | 507866018         | 88050005         | 507866018        |
| Optic nerve sheath haemorrhage                                    | 1216033015        | 14460007         | 1216033015       |
| Extradural h'ge inj no open intracran wnd+>24hr LOC+recovery      | 660041000006117   | 43216008         | 72101019         |
| Nasal hemorrhage                                                  | 11780441000006118 | 249366005        | 3633923016       |
| Bleeding of subgingival space                                     | 3902881000006112  | 86276007         | 507017016        |

|                                                               |                   |                  |                  |
|---------------------------------------------------------------|-------------------|------------------|------------------|
| Total blood loss                                              | 3279111000006114  | 48149007         | 80230019         |
| Abnormal bleeding/vaginal discharge                           | 981591000006114   | 981591000006105  | 981591000006114  |
| Subperiosteal haematoma                                       | 989951000006111   | 274179004        | 989951000006111  |
| Recurrent microscopic haematuria                              | 5656851000006118  | 281858008        | 419987015        |
| [X]Haemorrhage from respiratory passages, unspecified         | 317999019         | 95431003         | 512121010        |
| Respiratory tract haemorrhage                                 | 4056511000006117  | 95431003         | 4056511000006117 |
| Haemorrhage at vitreoretinal interface                        | 5239131000006113  | 247097006        | 369010014        |
| Seen in haematuria clinic                                     | 1682771000006111  | 1682771000006107 | 1682771000006111 |
| Dot AND blot haemorrhage                                      | 3288911000006114  | 48742005         | 495203014        |
| VH - Vitreous hemorrhage                                      | 3005211000006118  | 31341008         | 2579343019       |
| Haemarthrosis of shoulder joint                               | 7529901000006113  | 700018009        | 2987346012       |
| Pulmonary hemorrhage with glomerulonephritis                  | 3319071000006118  | 50581000         | 84267019         |
| Tracheostomy hemorrhage                                       | 3848221000006114  | 82872004         | 137462016        |
| Haemorrhagic diarrhoea                                        | 4058311000006112  | 95545007         | 512178019        |
| Hematoma                                                      | 6438781000006118  | 385494008        | 1477038019       |
| Adrenal hemorrhage                                            | 3294631000006115  | 49111001         | 81821014         |
| Deformity/haematoma of pinna                                  | 5721171000006118  | 286943000        | 426436012        |
| Intragel vitreous haemorrhage                                 | 3005181000006117  | 31341008         | 1216354019       |
| Hemorrhage control by packing                                 | 4716051000006119  | 182605004        | 282264011        |
| Haemarthrosis of glenohumeral joint                           | 7529881000006111  | 700018009        | 2987361013       |
| Haemorrhagic pancreatitis                                     | 2568891000006113  | 4399003          | 493744012        |
| Hemarthrosis of hand                                          | 2941131000006113  | 27507004         | 46020011         |
| Evacuation of haematoma of vagina                             | 6531321000006117  | 392256003        | 1476301016       |
| Pulmonary haemorrhage                                         | 3771001000006116  | 78144005         | 3771001000006116 |
| Retroperitoneal hematoma                                      | 5088461000006119  | 236002003        | 353769018        |
| Minor surgery postoperative complication - haemorrhage        | 914911000006113   | 914911000006109  | 914911000006113  |
| Postmenopausal postcoital bleeding                            | 2534105016        | 415149004        | 2534105016       |
| Hemarthrosis of metacarpophalangeal joint                     | 4813381000006116  | 202408006        | 2694346016       |
| Acute blood loss anemia                                       | 5500931000006115  | 267530009        | 2536036012       |
| Epistaxis control                                             | 11776911000006118 | 35807001         | 3633933012       |
| Traumatic extradural hematoma without open intracranial wound | 6053331000006117  | 315048006        | 459516011        |
| Haemarthrosis of subtalar joint                               | 310725010         | 202416002        | 310725010        |
| Hip haemarthrosis                                             | 310716016         | 202411007        | 310716016        |
| Haemarthrosis of talonavicular joint                          | 310728012         | 202417006        | 310728012        |
| Dysfunctional uterine hemorrhage                              | 2803941000006119  | 19155002         | 479159011        |
| Intra-abdominal hematoma                                      | 5088381000006115  | 235999009        | 353760019        |
| Posterior epistaxis                                           | 5035191000006115  | 232355001        | 348116016        |
| Evacuation of haematoma from temporal lobe of brain           | 265689012         | 171473007        | 265689012        |
| Haemorrhagic fibrinogenolysis                                 | 3596661000006113  | 67406007         | 500723016        |
| Mediastinal haematoma                                         | 2860621000006113  | 22625005         | 481391011        |
| Retinal macroaneurysm                                         | 369052016         | 247124009        | 369052016        |

|                                                                             |                   |           |                  |
|-----------------------------------------------------------------------------|-------------------|-----------|------------------|
| Haematoma of palate                                                         | 5455351000006116  | 262649007 | 390623016        |
| Subungual haematoma of foot                                                 | 11784831000006115 | 274203005 | 3513825017       |
| Recurrent frank haematuria                                                  | 5656811000006119  | 281856007 | 419982014        |
| Evacuation of perianal haematoma                                            | 433186012         | 293018003 | 433186012        |
| Packing for non-obstetric uterine bleeding                                  | 4716101000006119  | 182607007 | 282272013        |
| Testicular haemorrhage                                                      | 1216948012        | 77708008  | 1216948012       |
| Extradural haemorrhage following injury without open intracranial wound     | 402930018         | 43216008  | 493552012        |
| Haematoma of leg                                                            | 2674499019        | 91603007  | 151760014        |
| Prostatic congestion or haemorrhage NOS                                     | 304407017         | 197973004 | 304404012        |
| Retinal flame hemorrhage                                                    | 5239731000006114  | 247132001 | 1773842011       |
| Haematoma of testis                                                         | 5681911000006114  | 283944002 | 422515011        |
| Epistaxis                                                                   | 11780411000006117 | 249366005 | 3633921019       |
| Haemarthrosis - wrist joint                                                 | 890581000006114   | 202407001 | 890581000006114  |
| Haemarthrosis - knee joint                                                  | 890611000006118   | 202413005 | 890611000006118  |
| C/O p.v. bleeding                                                           | 12483181000006119 | 275570002 | 411565016        |
| Drainage of hematoma of external ear and control cavity with bolster suture | 4650071000006114  | 172619007 | 267228012        |
| Hemorrhage of testis                                                        | 3764251000006117  | 77708008  | 128969012        |
| Acute post-haemorrhagic anaemia                                             | 5500971000006117  | 267530009 | 2536040015       |
| Hemoptysis                                                                  | 11905461000006115 | 66857006  | 111056015        |
| Persistent microscopic haematuria                                           | 5656831000006113  | 281857003 | 419984010        |
| Anterior epistaxis                                                          | 5035151000006114  | 232354002 | 348112019        |
| Recurrent haematuria co-occurrent and due to minor glomerular abnormality   | 183201000006117   | 714823009 | 3300550011       |
| Conjunctival hemorrhage                                                     | 2835651000006118  | 21117005  | 35492010         |
| Hemophthalmos (excluding current injury)                                    | 4771051000006115  | 193287005 | 297685012        |
| Bleeding varicose vein of leg                                               | 4779581000006117  | 195448005 | 300726015        |
| Nasal haemorrhage                                                           | 11780431000006111 | 249366005 | 3633922014       |
| Suprachoroidal haemorrhage                                                  | 6939791000006112  | 419596007 | 2578131018       |
| Haemarthrosis of first metatarsophalangeal joint                            | 4813641000006117  | 202419009 | 2692686017       |
| Gingival haemorrhage                                                        | 3902921000006116  | 86276007  | 507021011        |
| Hemorrhagic pancreatitis                                                    | 2568881000006110  | 4399003   | 7701015          |
| O/E - speculum bleeding through os                                          | 4563041000006113  | 163415000 | 4563041000006113 |
| Kidney hematoma without rupture of capsule, with open wound into cavity     | 4855101000006116  | 210205007 | 321132016        |
| Postoperative control of hemorrhage of adenoids                             | 3135621000006114  | 39508008  | 66269014         |
| Macular subretinal hemorrhage                                               | 5240211000006116  | 247161000 | 369102011        |
| Acute post-hemorrhagic anemia                                               | 5500921000006118  | 267530009 | 2536035011       |
| Hemorrhage from pharynx                                                     | 6119821000006112  | 324618004 | 465450012        |
| Packing for haemorrhage                                                     | 4716031000006114  | 182605004 | 282265012        |
| Essential haematuria                                                        | 458617017         | 314280007 | 458617017        |
| Control of hemorrhage of nose                                               | 3076641000006117  | 35807001  | 59727010         |
| Drainage of hematoma of pinna                                               | 4650011000006117  | 172617009 | 267222013        |
| Exophthalmos due to orbital hemorrhage                                      | 4773741000006115  | 194016009 | 298691011        |



|                                                                                           |                  |           |            |
|-------------------------------------------------------------------------------------------|------------------|-----------|------------|
| Bleeding from breast                                                                      | 1805191000006113 | 52297004  | 87019010   |
| Intraretinal hemorrhage                                                                   | 2966441000006114 | 28998008  | 1783893010 |
| Hematoma of kidney                                                                        | 5458511000006119 | 262891006 | 390957010  |
| Crevicular bleeding of gum                                                                | 3902901000006114 | 86276007  | 507019018  |
| Haemarthrosis of shoulder                                                                 | 2540431000006115 | 2602008   | 1216220017 |
| O/E - throat hemorrhage                                                                   | 4577941000006112 | 164279008 | 255707017  |
| Hemorrhage of parathyroid                                                                 | 4758531000006114 | 190460008 | 292687011  |
| Testicular hemorrhage                                                                     | 3764271000006110 | 77708008  | 1218435011 |
| Traumatic extradural hematoma                                                             | 5459161000006119 | 262949005 | 391026017  |
| Postoperative hematoma formation                                                          | 4872571000006110 | 213262007 | 325138011  |
| Hemarthrosis of the ankle and/or foot                                                     | 5502491000006111 | 267948008 | 1477399016 |
| Airway hemorrhage                                                                         | 4056541000006118 | 95431003  | 1784236019 |
| On examination - retinal hemorrhages                                                      | 4573171000006111 | 163987005 | 2668326010 |
| Gingival crevice bleeding                                                                 | 3902891000006110 | 86276007  | 507018014  |
| Haematoma of auricle                                                                      | 3930871000006116 | 88050005  | 507867010  |
| Bleeding unrelated to menstrual cycle                                                     | 3557191000006117 | 64996003  | 108033013  |
| Superficial retinal hemorrhage                                                            | 3529381000006112 | 63297008  | 105219016  |
| Adrenocortical hemorrhage                                                                 | 5112201000006111 | 237766002 | 356329014  |
| Stomal bleeding                                                                           | 5090211000006119 | 236129005 | 353961014  |
| Other abnormal uterine and vaginal bleeding                                               | 456805013        | 301822002 | 443305015  |
| Pleural hemorrhage                                                                        | 3013661000006116 | 31892009  | 53279018   |
| Bloody diarrhea                                                                           | 4058331000006118 | 95545007  | 158255016  |
| On examination - vitreous hemorrhages                                                     | 4573251000006114 | 163990004 | 2668347014 |
| History of postmenopausal bleeding                                                        | 4544131000006114 | 161788002 | 2986807011 |
| Drainage of hematoma of external ear                                                      | 4650031000006111 | 172617009 | 267224014  |
| Normocytic anaemia following acute bleed                                                  | 445119014        | 303060002 | 445119014  |
| Surgical arrest of bleeding post dental extraction                                        | 117221000006116  | 173330006 | 268351013  |
| Haematoma of perineal wound                                                               | 6357731000006110 | 371610007 | 1207307018 |
| Control of nasal haemorrhage                                                              | 3076671000006113 | 35807001  | 1490108018 |
| Haemarthrosis of lesser metatarsophalangeal joint                                         | 812721000006118  | 202420003 | 310733011  |
| Control of epistaxis by suture                                                            | 5724371000006118 | 287400009 | 2988411019 |
| On examination - throat hemorrhage                                                        | 4577951000006114 | 164279008 | 2667890017 |
| [X]Vitreous haemorrhage in diseases classified elsewhere                                  | 299491012        | 31341008  | 484848010  |
| Secondary and recurrent haemorrhage                                                       | 157451000006115  | 212373009 | 323899017  |
| Recurrent haematuria co-occurrent and due to diffuse mesangiocapillary glomerulonephritis | 189181000006115  | 714819001 | 3300538017 |
| Intracanal vitreous hemorrhage                                                            | 3005191000006119 | 31341008  | 1217853012 |
| Hemarthrosis of shoulder                                                                  | 2540441000006113 | 2602008   | 1217723011 |
| Hyphaemia                                                                                 | 3723201000006112 | 75229002  | 502959013  |
| Haematoma with intact skin                                                                | 405394012        | 105618004 | 169739016  |
| Prostatic haemorrhage                                                                     | 1216632014       | 44843000  | 1216632014 |
| Prostatic congestion or haemorrhage                                                       | 304404012        | 197973004 | 304404012  |

|                                                                           |                   |                 |                  |
|---------------------------------------------------------------------------|-------------------|-----------------|------------------|
| Haemarthrosis of other specified site                                     | 12728591000006117 | 687801000000104 | 1505711000000112 |
| Haemarthrosis of the knee                                                 | 219591000000116   | 202413005       | 310720017        |
| Perirenal haematoma                                                       | 304164015         | 197824007       | 304164015        |
| Epistaxis control - suture                                                | 860721000006116   | 287400009       | 860721000006116  |
| Control of haemorrhage                                                    | 878511000006114   | 51241000        | 878511000006114  |
| Recurrent haematuria co-occurrent and due to dense deposit disease        | 304001012         | 714813000       | 3300520015       |
| Surgical arrest of postoperative bleeding from tonsillar bed              | 268510012         | 173440008       | 268510012        |
| Hemorrhage into bladder wall                                              | 2779531000006112  | 17615006        | 29772016         |
| Re-exploration of organ and surgical arrest of postoperative bleeding NOC | 184131000006117   | 621531000000109 | 1372281000000112 |
| [X]Sequelae of other nontraumatic intracranial haemorrhage                | 426231000006114   | 363302008       | 482447013        |
| Uterine hemorrhage                                                        | 3116561000006117  | 38280009        | 64072010         |
| Renal artery hemorrhage                                                   | 4789521000006111  | 197812000       | 304141017        |
| Haemarthrosis of knee                                                     | 310720017         | 202413005       | 310720017        |
| Haemarthrosis of MCP joint                                                | 310707015         | 202408006       | 310707015        |
| Epistaxis control - cautery                                               | 5724261000006115  | 287382003       | 426914018        |
| Pack to control postnatal haemorrhage                                     | 394488013         | 265641004       | 394488013        |
| Hemarthrosis of distal radioulnar joint                                   | 4813301000006113  | 202406005       | 310702014        |
| Choroidal haemorrhage and rupture                                         | 297942018         | 193474002       | 297942018        |
| Painless haematuria                                                       | 304345017         | 197938001       | 304345017        |
| Frank haematuria                                                          | 304353013         | 197941005       | 304353013        |
| Haemorrhage of seminal vesicle                                            | 2635281000006115  | 8465005         | 506159011        |
| Spontaneous hyphaema                                                      | 5914111000006110  | 303019009       | 445086014        |
| Secondary haemorrhage                                                     | 5459051000006115  | 262938004       | 391013016        |
| Secondary post tonsillectomy hemorrhage                                   | 6046541000006111  | 314484001       | 458850015        |
| Haemorrhage of blood vessel                                               | 6715161000006118  | 405539004       | 2153971019       |
| Acute haemorrhagic pancreatitis                                           | 493743018         | 4399003         | 493743018        |
| Deep retinal haemorrhage                                                  | 495202016         | 48742005        | 495202016        |
| Liver haematoma and contusion with open wound into cavity                 | 321093013         | 21580006        | 36197018         |
| Epistaxis from anterior nasal septum                                      | 5035171000006116  | 232354002       | 348114018        |
| Periorbital haematoma                                                     | 2626321000006115  | 7927006         | 504059010        |
| Traumatic intracranial haemorrhage                                        | 660121000006113   | 450410005       | 2915482010       |
| Scrotal hematoma due to non-traumatic cause                               | 4790931000006114  | 198058000       | 304526010        |
| Extradural hemorrhage following injury without open intracranial wound    | 3196371000006118  | 43216008        | 72101019         |
| Subcutaneous haematoma                                                    | 2584481000006117  | 5309003         | 496551013        |
| Conjunctival haemorrhage                                                  | 298518014         | 21117005        | 480926011        |
| Haematoma of skin                                                         | 5625851000006111  | 279420009       | 416697010        |
| Perioperative haematoma                                                   | 3636045011        | 762958007       | 3636045011       |
| Haematuria NOS                                                            | 886851000006119   | 34436003        | 886851000006119  |
| Chemical haematuria                                                       | 5097881000006114  | 236718002       | 354812019        |
| Haematoma of cervix                                                       | 5682141000006118  | 283965008       | 422540016        |

|                                                           |                   |                 |                  |
|-----------------------------------------------------------|-------------------|-----------------|------------------|
| Pharyngeal haemorrhage                                    | 317317013         | 324618004       | 465451011        |
| Haematoma of scalp                                        | 7223281000006117  | 439461004       | 2794134010       |
| Perinephric hematoma                                      | 4789671000006111  | 197824007       | 304161011        |
| Evidence of recent epistaxis                              | 5596491000006110  | 277236000       | 413696012        |
| Epistaxis                                                 | 11905371000006119 | 12441001        | 21406015         |
| Macular subretinal haemorrhage                            | 5240201000006119  | 247161000       | 369103018        |
| Traumatic intracranial extradural hematoma                | 5459191000006110  | 262949005       | 2915790014       |
| Intra-alveolar haemorrhage                                | 3771051000006117  | 78144005        | 503766010        |
| Vaginal introitus bleeding                                | 5264711000006114  | 248978005       | 371563010        |
| Pelvic hematoma                                           | 5477491000006112  | 264558008       | 393036018        |
| Deformity/hematoma of pinna                               | 5721181000006115  | 286943000       | 426435011        |
| PCB - Postcoital bleeding                                 | 3290931000006116  | 48880000        | 1230662018       |
| Subungual hematoma                                        | 5510911000006111  | 269219004       | 403015018        |
| Cortical hemorrhage                                       | 3299621000006119  | 49422009        | 82320015         |
| Haematoma of spleen                                       | 5457461000006118  | 262818004       | 390850011        |
| Haematuria of undiagnosed cause                           | 6044681000006112  | 314280007       | 458614012        |
| Haemorrhage of thyroid                                    | 2546991000006113  | 3002002         | 484460015        |
| Haemarthrosis of proximal interphalangeal joint of finger | 4813391000006118  | 202409003       | 1772566017       |
| Hemorrhage into cornea                                    | 5029241000006115  | 231916005       | 347516011        |
| Bleeding from nipple                                      | 1805151000006119  | 248838002       | 371379012        |
| Hemarthrosis of proximal interphalangeal joint of finger  | 4813421000006114  | 202409003       | 1773835011       |
| Complaining of per vaginam bleeding                       | 5574801000006117  | 275570002       | 5574801000006117 |
| Evacuation of subungual hematoma                          | 3939701000006111  | 88584000        | 146879013        |
| Haemorrhagic detachment of retinal pigment epithelium     | 3312491000006115  | 50165004        | 495600016        |
| Hemarthrosis-1st metatarsophalangeal joint                | 4813631000006110  | 202419009       | 310731013        |
| Retinal hemorrhage                                        | 2966401000006112  | 28998008        | 48549019         |
| Haemorrhage from the ear                                  | 2921451000006112  | 26322001        | 483175014        |
| Secondary and recurrent haemorrhage                       | 323899017         | 212373009       | 323899017        |
| Aspiration of haematoma of organ NOC                      | 279090012         | 621461000000103 | 1372141000000114 |
| Ureteric haemorrhage                                      | 354662010         | 236606001       | 354662010        |
| Haemorrhage control by packing                            | 282266013         | 182605004       | 282266013        |
| Profuse vaginal bleeding                                  | 5748551000006112  | 289540009       | 429440019        |
| Secondary post tonsillectomy haemorrhage                  | 458851016         | 314484001       | 458851016        |
| Breast haematoma                                          | 5913291000006111  | 302924003       | 444949017        |
| Diabetic vitreous haemorrhage                             | 6022831000006119  | 312910009       | 456713019        |
| Haemophthalmos (excluding current injury)                 | 297686013         | 193287005       | 297686013        |
| Renal artery haemorrhage                                  | 304142012         | 197812000       | 304142012        |
| Haematuria - cause not known                              | 6044721000006117  | 314280007       | 458616014        |
| Subhyaloid haemorrhage                                    | 5239151000006118  | 247098001       | 369013011        |
| Haemorrhage - postoperative                               | 814171000006110   | 110265006       | 202906017        |
| VH - Vitreous haemorrhage                                 | 3005201000006116  | 31341008        | 2579342012       |

|                                                                        |                  |                 |                  |
|------------------------------------------------------------------------|------------------|-----------------|------------------|
| Hemarthrosis of distal interphalangeal joint of finger                 | 4813451000006117 | 202410008       | 2694113016       |
| Haemarthrosis - knee joint                                             | 989491000006111  | 202413005       | 989491000006111  |
| Vaginal vault bleeding                                                 | 5650051000006112 | 281309004       | 419293019        |
| Abnormal uterine bleeding unrelated to menstrual cycle                 | 456806014        | 312984006       | 456806014        |
| Vitreous haemorrhage                                                   | 484848010        | 31341008        | 484848010        |
| Insertion of Brighton epistaxis balloon                                | 267563018        | 172821004       | 267563018        |
| Haematuria/abnormal colour                                             | 962031000006113  | 962031000006109 | 962031000006113  |
| Haemarthrosis - elbow joint                                            | 890571000006111  | 202405009       | 890571000006111  |
| Hip hemarthrosis                                                       | 4813481000006113 | 202411007       | 310714018        |
| Anaemia due to acute blood loss                                        | 5500951000006110 | 267530009       | 2536038013       |
| Nontraumatic hematoma of breast                                        | 4791281000006112 | 198123000       | 2619485017       |
| Intraocular bleeding                                                   | 4021601000006110 | 93478000        | 154754010        |
| Haemoperitoneum                                                        | 3236681000006116 | 45626005        | 494283018        |
| Haematoma AND contusion of liver with open wound into abdominal cavity | 2843221000006113 | 21580006        | 481063010        |
| Peritoneal haemorrhage                                                 | 3236691000006118 | 45626005        | 494284012        |
| Evacuation of hematoma from temporal lobe of brain                     | 4644231000006112 | 171473007       | 265688016        |
| Prostatic congestion or hemorrhage                                     | 4790551000006114 | 197973004       | 304405013        |
| Choroidal haemorrhage or rupture NOS                                   | 297946015        | 193474002       | 297942018        |
| Hemarthrosis of talonavicular joint                                    | 4813611000006116 | 202417006       | 310727019        |
| PMB - Postmenopausal bleeding                                          | 3748141000006114 | 76742009        | 503350010        |
| Hemorrhagic fibrinogenolysis                                           | 3596641000006114 | 67406007        | 112019014        |
| Preretinal hemorrhage                                                  | 2683841000006116 | 11547003        | 19960018         |
| Evacuation of vaginal haematoma                                        | 6531341000006112 | 392256003       | 1490236018       |
| Haemarthrosis of tibiofibular joint                                    | 4813541000006118 | 202414004       | 310721018        |
| Haematoma                                                              | 982751000006117  | 982751000006101 | 982751000006117  |
| Haemarthrosis - shoulder joint                                         | 890561000006116  | 2602008         | 890561000006116  |
| Nontraumatic epidural hemorrhage                                       | 6593131000006114 | 397809001       | 1784005019       |
| EDH - Extradural hematoma                                              | 3850541000006117 | 82999001        | 1218488017       |
| Postoperative bleeding                                                 | 4177081000006114 | 110265006       | 175035011        |
| Nontraumatic extradural hemorrhage                                     | 6593111000006115 | 397809001       | 1774439018       |
| Haemorrhage of dialysis arteriovenous shunt                            | 2240911000000119 | 867031000000105 | 2240911000000119 |
| Drainage of haematoma of pinna                                         | 4650001000006115 | 172617009       | 267225010        |
| Surgical arrest of bleeding from internal nose OS                      | 117211000006112  | 172811007       | 267550012        |
| On examination - vitreous haemorrhages                                 | 4573241000006112 | 163990004       | 2668346017       |
| Evacuation of hematoma                                                 | 4305861000006115 | 118441006       | 176736013        |
| Hemorrhage of eyelid                                                   | 3536341000006111 | 63720000        | 105912017        |
| Paroxysmal haematoma of the finger                                     | 1697911000006119 | 238824006       | 357936010        |
| Evacuation of intracranial extradural hematoma                         | 4645651000006115 | 171713001       | 265969013        |
| [X]Haemorrhage, not elsewhere classified                               | 318044011        | 131148009       | 210860014        |
| Optic nerve haemorrhage                                                | 2729101000006110 | 14460007        | 476341017        |
| Superficial haematoma                                                  | 5518261000006115 | 270911002       | 405395013        |

|                                                                                    |                   |                  |                  |
|------------------------------------------------------------------------------------|-------------------|------------------|------------------|
| Nasal packing for control of haemorrhage                                           | 5563931000006112  | 274491002        | 2669563011       |
| Surgical arrest of bleeding from internal nose NOS                                 | 267560015         | 172811007        | 267550012        |
| VTE risk assessment - active bleeding                                              | 1992421000006117  | 1992421000006101 | 1992421000006117 |
| Secondary and recurrent hemorrhage                                                 | 4868001000006115  | 212373009        | 323900010        |
| Control of epistaxis using nasal packing                                           | 5563951000006117  | 274491002        | 2793090012       |
| Tracheostomy haemorrhage                                                           | 505306012         | 82872004         | 505306012        |
| Haematoma of rectus sheath                                                         | 451473014         | 308154003        | 451473014        |
| Control of epistaxis by cautery                                                    | 5724251000006117  | 287382003        | 2988735013       |
| Hemophthalmos, except current injury                                               | 4771091000006114  | 193287005        | 2550869013       |
| Hematoma of broad ligament                                                         | 3855481000006115  | 83294006         | 138135015        |
| Testicular haematoma due to nontraumatic cause                                     | 110341000006115   | 35644004         | 1216444017       |
| Surgical arrest of post-extraction haemorrhage                                     | 117241000006111   | 173330006        | 268351013        |
| Nontraumatic extradural intracranial hemorrhage                                    | 6593141000006116  | 397809001        | 2915638010       |
| Haemarthrosis of sacroiliac joint                                                  | 812781000006119   | 202412000        | 310717013        |
| Bleeding from nose                                                                 | 317316016         | 249366005        | 372073016        |
| Hemarthrosis of lesser metatarsophalangeal joint                                   | 4813671000006113  | 202420003        | 310734017        |
| Splenic haematoma                                                                  | 5457451000006115  | 262818004        | 390849011        |
| Hemarthrosis of sacroiliac joint                                                   | 4813511000006117  | 202412000        | 310718015        |
| Peri-operative haemorrhage or haematoma                                            | 11904821000006110 | 269302003        | 403111013        |
| Hemorrhage of prostate                                                             | 3223411000006116  | 44843000         | 74812016         |
| Choroidal haemorrhage                                                              | 2500391000006119  | 122003           | 2500391000006119 |
| Pack to control postnatal vaginal bleeding                                         | 394487015         | 265641004        | 394487015        |
| Evacuation of haematoma of vulva                                                   | 500187011         | 65687007         | 1216830016       |
| Recurrent haematuria co-occurrent and due to diffuse crescentic glomerulonephritis | 189131000006116   | 714815007        | 3300526014       |
| Postoperative haemorrhage                                                          | 217221000006118   | 110265006        | 202906017        |
| Hematoma with intact skin                                                          | 5518211000006118  | 270911002        | 405389012        |
| Haemopericardium                                                                   | 39303019          | 23412002         | 39303019         |
| Gingival crevicular bleeding                                                       | 3902871000006114  | 86276007         | 507016013        |
| Intramuscular haematoma                                                            | 768621000006112   | 262969000        | 391070014        |
| Intraocular haemorrhage                                                            | 769531000006117   | 93478000         | 510363011        |
| Extradural h'ge inj no open intracranial wnd+<1hr loss consc                       | 660101000006115   | 43216008         | 72101019         |
| Extradural h'ge inj no open intracranial wnd + no loss consc                       | 660081000006111   | 43216008         | 72101019         |
| Haemorrhage of corpus cavernosum                                                   | 3629431000006110  | 69452005         | 501277010        |
| Haemarthrosis of other tarsal joint                                                | 310729016         | 267948008        | 400242010        |
| Preretinal haemorrhage                                                             | 207961000006117   | 11547003         | 411993013        |
| Haemarthrosis of the forearm                                                       | 812851000006116   | 202407001        | 310703016        |
| Incision and drainage of breast haematoma                                          | 5570921000006110  | 275236004        | 411190012        |
| Evacuation of hematoma of vulva                                                    | 3568151000006118  | 65687007         | 109140016        |
| Corpus cavernosum hemorrhage                                                       | 3629461000006118  | 69452005         | 1218360010       |
| Packing for hemorrhage                                                             | 4716071000006112  | 182605004        | 282267016        |
| Haemarthrosis - multiple joint                                                     | 890641000006119   | 76427005         | 890641000006119  |

|                                                                                     |                   |                 |                  |
|-------------------------------------------------------------------------------------|-------------------|-----------------|------------------|
| Peritoneal hemorrhage                                                               | 3236661000006114  | 45626005        | 76084011         |
| Hemarthrosis of multiple sites                                                      | 3743251000006114  | 76427005        | 126927017        |
| Pulmonary hemorrhage                                                                | 11905681000006111 | 78144005        | 129684011        |
| Nontraumatic breast hematoma                                                        | 4791301000006111  | 198123000       | 3012814013       |
| Acute blood loss anaemia                                                            | 5500961000006112  | 267530009       | 2536039017       |
| Retrobulbar hemorrhage                                                              | 4774381000006112  | 194179009       | 298913011        |
| Hemorrhagic choroidal detachment                                                    | 2802071000006118  | 19031009        | 32080012         |
| Pneumohaemothorax                                                                   | 2763821000006115  | 16632002        | 28150019         |
| On examination - bleeding gums                                                      | 4558931000006115  | 163164001       | 2667369016       |
| Bleeding after menopause                                                            | 3748151000006111  | 76742009        | 503351014        |
| Drainage of hematoma of pinna and insertion of bolster sutures                      | 4650091000006110  | 172619007       | 267231013        |
| Evacuation of vaginal hematoma                                                      | 6531351000006114  | 392256003       | 1490465014       |
| Haemorrhage of dialysis arteriovenous fistula                                       | 2240871000000116  | 867011000000102 | 2240871000000116 |
| Haematuria - symptom                                                                | 813391000006111   | 34436003        | 57480016         |
| Haemarthrosis of distal radioulnar joint                                            | 812671000006110   | 202406005       | 310701019        |
| Haemarthrosis-1st metatarsophalangeal joint                                         | 812951000006113   | 202419009       | 310732018        |
| H/O: postcoital bleeding                                                            | 811291000006116   | 161786003       | 252099013        |
| Scrotal haematoma due to non-traumatic cause                                        | 156461000006116   | 198058000       | 304525014        |
| Recurrent haematuria co-occurrent and due to focal and segmental glomerular lesions | 189151000006111   | 714827005       | 3300562010       |
| Hemarthrosis of shoulder region                                                     | 2540421000006118  | 2602008         | 5429017          |
| Retrobulbar hematoma                                                                | 4774391000006110  | 194179009       | 298914017        |
| Male genital haematoma NOS                                                          | 304528011         | 198057005       | 304524013        |
| Functional uterine haemorrhage NOS                                                  | 305075011         | 19155002        | 32278010         |
| Complaining of per vaginam bleeding                                                 | 411565016         | 275570002       | 2984033019       |
| Recurrent and persistent haematuria, dense deposit disease                          | 11904541000006117 | 281860005       | 189231000006110  |
| Subretinal hemorrhage                                                               | 2721051000006114  | 13937002        | 23758016         |
| Deep intra-retinal haemorrhages                                                     | 3288901000006111  | 48742005        | 495201011        |
| Internal prosthetic device causing hemorrhage                                       | 4871651000006112  | 213133000       | 324953013        |
| Airway haemorrhage                                                                  | 4056531000006111  | 95431003        | 1783845016       |
| Vaginal haematoma                                                                   | 496575013         | 53162000        | 496575013        |
| Anti-GBM nephritis with pulmonary hemorrhage                                        | 3319091000006117  | 50581000        | 84270015         |
| Hemarthrosis of the ankle                                                           | 4813571000006114  | 202415003       | 310723015        |
| [X]Other specified abnormal uterine and vaginal bleeding                            | 305260014         | 301822002       | 443305015        |
| Contact bleeding from cervix                                                        | 590531000006114   | 248980004       | 371565015        |
| Retinal blot haemorrhages                                                           | 3288891000006112  | 48742005        | 495200012        |
| Subconjunctival hemorrhage                                                          | 3781231000006112  | 78768009        | 130708019        |
| Microscopic haematuria                                                              | 304349011         | 197940006       | 304349011        |
| Liver haematoma                                                                     | 739711000006114   | 262796008       | 390818018        |
| Liver haematoma                                                                     | 12704641000006114 | 262796008       | 390819014        |
| Hemarthrosis of shoulder joint                                                      | 7529891000006114  | 700018009       | 2987325015       |
| Haemarthrosis - other joint                                                         | 890631000006112   | 687801000000104 | 890631000006112  |

|                                                                             |                   |                 |                  |
|-----------------------------------------------------------------------------|-------------------|-----------------|------------------|
| Choroidal haemorrhage                                                       | 297943011         | 122003          | 1256014          |
| Extradural h'ge inj no open intracran wnd+>24hr<br>LOC-restored             | 660051000006115   | 43216008        | 72101019         |
| Haemarthrosis of the lower leg                                              | 812881000006112   | 202413005       | 310719011        |
| Epidural haematoma                                                          | 7583041000006117  | 703861005       | 3010111010       |
| Bleeding of oral mucosa                                                     | 5271491000006119  | 249418002       | 372144017        |
| Control of epistaxis by unlisted technique                                  | 3076661000006118  | 35807001        | 59732011         |
| Control of haemorrhage                                                      | 3330341000006112  | 51241000        | 495965010        |
| Hematoma of perineal wound                                                  | 6357741000006117  | 371610007       | 1208119015       |
| Closed heart injury with haemopericardium                                   | 455462013         | 311830005       | 455462013        |
| Tanner devascularisation for bleeding varices                               | 114801000006118   | 173617001       | 268812014        |
| Traumatic retinopathy                                                       | 5030871000006117  | 232030000       | 347668010        |
| Haemorrhage of dialysis vascular access                                     | 2237901000000119  | 865801000000100 | 2237901000000119 |
| Extradural haemorrhage                                                      | 3850521000006112  | 82999001        | 505380015        |
| Spleen haematoma without mention of open wound<br>into cavity               | 135631000006119   | 262818004       | 390849011        |
| Elbow hemarthrosis                                                          | 4813271000006111  | 202405009       | 310698010        |
| Haematoma                                                                   | 813271000006118   | 385494008       | 1476077014       |
| Ureteric hemorrhage                                                         | 5096531000006113  | 236606001       | 354661015        |
| Choroidal hemorrhage                                                        | 2500401000006117  | 122003          | 1256014          |
| Haemorrhage from ureter                                                     | 5096511000006119  | 236606001       | 354660019        |
| [X]Sequelae of stroke,not specfd as h'morrhage or<br>infarction             | 426321000006116   | 195239002       | 300403014        |
| Haemopneumothorax                                                           | 477873012         | 16632002        | 477873012        |
| Haematoma of vulva                                                          | 501268015         | 69385001        | 501268015        |
| Bleeding from urethra                                                       | 371988014         | 249301002       | 371988014        |
| Irregular uterine bleeding                                                  | 3804361000006111  | 80182007        | 504362017        |
| Kidney haematoma without mention of open wound<br>into cavity               | 754831000006113   | 262891006       | 390956018        |
| Kidney haematoma without rupture of capsule, with<br>open wound into cavity | 754821000006110   | 210205007       | 321133014        |
| Hemorrhagic diarrhea                                                        | 4058321000006116  | 95545007        | 158254017        |
| Intraretinal haemorrhage                                                    | 2966431000006116  | 28998008        | 1783522015       |
| Haemarthrosis of the ankle and/or foot                                      | 5502461000006115  | 267948008       | 1476436016       |
| Choroidal haemorrhage                                                       | 12702351000006114 | 122003          | 469795010        |
| Extradural h'ge inj no open intracranial wnd +<br>unspec consc              | 660091000006114   | 262949005       | 391026017        |
| Hyphaema of right eye                                                       | 3526020015        | 680521000119101 | 3526020015       |
| Haemarthrosis of shoulder                                                   | 1216220017        | 700018009       | 2987325015       |
| Epistaxis symptom                                                           | 647631000006114   | 249366005       | 372073016        |
| Has nosebleeds - epistaxis                                                  | 816991000006115   | 249366005       | 372073016        |
| Subperiosteal haematoma                                                     | 933081000006112   | 669341000000103 | 933081000006112  |
| Nontraumatic haematoma of testis                                            | 3073981000006111  | 35644004        | 486230013        |
| Retinal flame haemorrhage                                                   | 5239721000006111  | 247132001       | 1772573010       |
| Hemorrhage in uterus                                                        | 3116551000006119  | 38280009        | 64071015         |
| Hematoma of auricle                                                         | 3930861000006111  | 88050005        | 145964013        |

|                                                                                                                         |                   |                 |                   |
|-------------------------------------------------------------------------------------------------------------------------|-------------------|-----------------|-------------------|
| Perirenal hematoma                                                                                                      | 4789681000006114  | 197824007       | 304162016         |
| Postoperative hemorrhage control                                                                                        | 5564171000006114  | 274508002       | 410325011         |
| Hemorrhage of corpus cavernosum                                                                                         | 3629441000006117  | 69452005        | 115380016         |
| Secondary and recurrent haemorrhage                                                                                     | 157461000006118   | 212373009       | 323899017         |
| Reopening of abdomen and re-exploration of intra-abdominal operation site and surgical arrest of postoperative bleeding | 177571000006110   | 177956008       | 275461019         |
| Renal haematoma with open wound into cavity                                                                             | 176891000006112   | 210205007       | 321133014         |
| Postoperative haematoma formation                                                                                       | 217211000006114   | 213262007       | 325137018         |
| Hemarthrosis of interphalangeal joint of toe                                                                            | 4813691000006114  | 202421004       | 310735016         |
| Gingival hemorrhage                                                                                                     | 3902911000006112  | 86276007        | 507020012         |
| Hemarthrosis of the ankle and foot                                                                                      | 5502471000006110  | 267948008       | 400242010         |
| Reopening of abdomen and reexploration of intra-abdominal operation site and surgical arrest of postoperative bleeding  | 4680671000006110  | 177956008       | 2164235018        |
| Intramuscular hematoma                                                                                                  | 5459481000006117  | 262969000       | 391071013         |
| Chronic haematoma of pinna                                                                                              | 2950691000006112  | 28072004        | 1216250013        |
| Bleeding hemorrhoids                                                                                                    | 3335281000006117  | 51551000        | 85856015          |
| Painful haematuria                                                                                                      | 304348015         | 197939009       | 304348015         |
| Breast haematoma due to non-traumatic cause                                                                             | 525281000006114   | 198123000       | 304630018         |
| Extradural h'ge inj no open intracra wnd+LOC unspec duration                                                            | 660031000006110   | 262949005       | 391026017         |
| Peri-operative hemorrhage or hematoma                                                                                   | 5511401000006112  | 269302003       | 403112018         |
| Evacuation of extradural haematoma                                                                                      | 649541000006113   | 171713001       | 265968017         |
| [X]Haemorrhage from other sites in respiratory passages                                                                 | 12469521000006114 | 397271000000104 | 388341000006114   |
| Postoperative control of haemorrhage of adenoids                                                                        | 12705111000006117 | 39508008        | 492111018         |
| Flame-shaped hemorrhage                                                                                                 | 12222151000006110 | 247132001       | 3644831017        |
| Subconjunctival haemorrhage                                                                                             | 503913016         | 78768009        | 503913016         |
| Liver haematoma and contusion without open wound into cavity                                                            | 11989661000006117 | 262796008       | 11989661000006117 |
| Thyroid hemorrhage                                                                                                      | 2547021000006110  | 3002002         | 1217810012        |
| Haemarthrosis of the upper arm                                                                                          | 812911000006112   | 202405009       | 310697017         |
| Retinal dot haemorrhage                                                                                                 | 5239801000006114  | 247133006       | 1772574016        |
| Subchorionic haematoma                                                                                                  | 7494711000006110  | 609204004       | 2958468013        |
| Ventricular haemorrhage                                                                                                 | 2871241000006118  | 23276006        | 481581018         |
| Vaginal bleeding                                                                                                        | 1783697014        | 289530006       | 2983956017        |
| Bleeding from mouth                                                                                                     | 2858321000006110  | 22490002        | 37748013          |
| Subchondral haematoma                                                                                                   | 5651931000006113  | 281464006       | 419472015         |
| Epistaxis from Little's area                                                                                            | 5035181000006118  | 232354002       | 348115017         |
| Pneumoemothorax                                                                                                         | 2763831000006117  | 16632002        | 28152010          |
| Hyphemia                                                                                                                | 3723191000006114  | 75229002        | 124941011         |
| Intra-alveolar hemorrhage                                                                                               | 3771021000006114  | 78144005        | 129685012         |
| Hemarthrosis of elbow                                                                                                   | 4813261000006116  | 202405009       | 310697017         |
| Abnormal uterine and vaginal bleeding, unspecified                                                                      | 456809019         | 312984006       | 456806014         |
| Extradural hemorrhage after injury                                                                                      | 5459171000006114  | 262949005       | 391027014         |



|                                                                                                     |                  |                  |                  |
|-----------------------------------------------------------------------------------------------------|------------------|------------------|------------------|
| Thyroid haemorrhage or infarction NOS                                                               | 292445017        | 190305000        | 292443012        |
| Corneal hemorrhage                                                                                  | 5029231000006113 | 231916005        | 347515010        |
| Haemarthrosis of interphalangeal joint of toe                                                       | 812701000006111  | 202421004        | 310736015        |
| O/E - subconjunctival haemorrhage                                                                   | 270631000006114  | 162815002        | 253783017        |
| Hemarthrosis of tibiofibular joint                                                                  | 4813551000006116 | 202414004        | 310722013        |
| Haemorrhage into cornea                                                                             | 5029221000006110 | 231916005        | 347514014        |
| Superficial hematoma                                                                                | 5518221000006114 | 270911002        | 405390015        |
| Renal haematoma without mention of open wound into cavity                                           | 176901000006111  | 262891006        | 390956018        |
| Haemarthrosis of shoulder region                                                                    | 812901000006114  | 2602008          | 483092019        |
| Haemarthrosis of tibio-fibular joint                                                                | 812921000006116  | 202414004        | 310721018        |
| Epistaxis control by cryosurgery                                                                    | 5724341000006114 | 287393001        | 426925010        |
| Hemophthalmos without current injury                                                                | 4771071000006113 | 193287005        | 2547719019       |
| O/E - retinal haemorrhages                                                                          | 255337011        | 163987005        | 255337011        |
| Splenic hematoma                                                                                    | 5457471000006113 | 262818004        | 390851010        |
| Abnormal uterine bleeding                                                                           | 456807017        | 44991000119100   | 2995739016       |
| Intraoperative hemorrhage                                                                           | 4872551000006117 | 213261000        | 325135014        |
| Bleeding after intercourse                                                                          | 3290921000006119 | 48880000         | 1230661013       |
| Male genital haemorrhage NOS                                                                        | 396748016        | 198057005        | 304524013        |
| Recurrent haematuria co-occurrent and due to diffuse endocapillary proliferative glomerulonephritis | 189161000006113  | 714817004        | 3300532016       |
| Excessive bleeding at onset of menopause                                                            | 3936961000006118 | 88424000         | 146605017        |
| Bleeding from ear                                                                                   | 2921411000006111 | 26322001         | 483174013        |
| Hemorrhage                                                                                          | 4454751000006112 | 131148009        | 3035867011       |
| Extradural h'ge inj no open intracran wnd+concussion unspec                                         | 660071000006113  | 262949005        | 391026017        |
| Urethral meatal bleeding during urinary catheterisation                                             | 1938681000006112 | 1938681000006108 | 1938681000006112 |
| Wound haematoma                                                                                     | 5131541000006113 | 239160006        | 358450014        |
| Arterial haemorrhage                                                                                | 5058751000006119 | 234003006        | 350613018        |
| Delayed/excessive haemorrhage                                                                       | 887711000006114  | 198827002        | 887711000006114  |
| Drainage of haematoma of external ear and control cavity with bolster suture                        | 628481000006113  | 172619007        | 267230014        |
| Scrotal hematoma                                                                                    | 3962431000006110 | 89966002         | 149129014        |
| Hemorrhage control                                                                                  | 3330371000006116 | 51241000         | 1490495018       |
| Drainage of subungual haematoma                                                                     | 508104019        | 88584000         | 508104019        |
| Evacuation of vulval hematoma                                                                       | 3568171000006111 | 65687007         | 1218318011       |
| Heavy episode of vaginal bleeding                                                                   | 459713018        | 315224006        | 459713018        |
| Bladder hemorrhage                                                                                  | 4790081000006111 | 197887003        | 304254016        |
| Haemorrhage                                                                                         | 300840014        | 131148009        | 3035879011       |
| Recurrent haematuria                                                                                | 303986013        | 281860005        | 419991013        |
| Optic nerve hemorrhage                                                                              | 2729091000006116 | 14460007         | 24580011         |
| Pharyngeal haemorrhage                                                                              | 6119801000006119 | 324618004        | 6119801000006119 |
| Haematoma - perineal wound                                                                          | 813251000006111  | 371610007        | 1207307018       |
| Haemarthrosis of ankle                                                                              | 812651000006117  | 202415003        | 310724014        |

|                                                                                                 |                  |                  |                  |
|-------------------------------------------------------------------------------------------------|------------------|------------------|------------------|
| Retinal pigment epithelium hemorrhagic detachment                                               | 3312521000006118 | 50165004         | 1218183019       |
| Drainage of haematoma of external ear                                                           | 267223015        | 172617009        | 267223015        |
| Haematuria                                                                                      | 57480016         | 34436003         | 57480016         |
| Chronic hematoma of pinna                                                                       | 2950701000006112 | 28072004         | 1217750018       |
| Epidural intracranial haemorrhage                                                               | 3850551000006115 | 82999001         | 2915908018       |
| Haemorrhage into bladder wall                                                                   | 478383018        | 17615006         | 478383018        |
| Subungual Haematoma                                                                             | 1576441000006114 | 1576441000006105 | 1576441000006114 |
| Recurrent haematuria co-occurrent and due to diffuse membranous glomerulonephritis              | 189141000006114  | 714821006        | 3300544018       |
| Retroperitoneal haematoma                                                                       | 353768014        | 236002003        | 353768014        |
| On examination - epistaxis                                                                      | 255582011        | 164187003        | 2667170012       |
| Epistaxis control                                                                               | 860691000006114  | 35807001         | 860691000006114  |
| Bladder haemorrhage                                                                             | 304253010        | 197887003        | 304253010        |
| Submembranous retinal haemorrhage                                                               | 2683861000006117 | 11547003         | 411995018        |
| Nontraumatic extradural haemorrhage                                                             | 660111000006117  | 397809001        | 1773153015       |
| Traumatic extradural haematoma without open intracranial wound                                  | 86021000006119   | 315048006        | 459515010        |
| Prostatic hemorrhage                                                                            | 3223431000006110 | 44843000         | 1218121019       |
| Gingival bleeding                                                                               | 3902861000006119 | 86276007         | 143081017        |
| Intrarenal haematoma                                                                            | 304143019        | 197813005        | 304143019        |
| Clot haematuria                                                                                 | 304355018        | 197942003        | 304355018        |
| Post-op. haemorrhage control                                                                    | 878521000006118  | 274508002        | 878521000006118  |
| Haemoperitoneum - non-traumatic                                                                 | 813971000006111  | 45626005         | 494282011        |
| H/O: postmenopausal bleeding                                                                    | 811301000006115  | 161788002        | 252102013        |
| Haemarthrosis of the pelvic region and thigh                                                    | 812891000006110  | 202411007        | 310713012        |
| Postoperative control of haemorrhage of adenoids                                                | 1543141000006110 | 39508008         | 66269014         |
| Bulbar haemorrhage                                                                              | 483988011        | 732923001        | 3467313018       |
| Haemarthrosis - shoulder joint                                                                  | 989471000006110  | 2602008          | 989471000006110  |
| Spleen injury with haematoma without rupture of capsule, with open wound into cavity            | 135621000006117  | 210190001        | 321114016        |
| Haemorrhage of dialysis arteriovenous graft                                                     | 2240831000000118 | 866991000000105  | 2240831000000118 |
| Recurrent haematuria co-occurrent and due to diffuse mesangial proliferative glomerulonephritis | 189171000006118  | 714825002        | 3300556017       |
| Expulsive choroidal haemorrhage                                                                 | 420970014        | 11623000         | 420970014        |
| Drainage of breast haematoma                                                                    | 5106761000006119 | 237402002        | 355796018        |
| Acute haematoma of pinna                                                                        | 5912831000006117 | 302906000        | 444900012        |
| Hemarthrosis of sternoclavicular joint                                                          | 4813221000006110 | 202403002        | 310693018        |
| Haemorrhage of scrotum                                                                          | 3510201000006112 | 62182006         | 499223018        |
| Retinal haemorrhage                                                                             | 297864014        | 28998008         | 484055013        |
| Bleeding from the ear                                                                           | 2921431000006117 | 26322001         | 44085018         |
| Hematoma of rectus sheath                                                                       | 5975711000006116 | 308154003        | 451472016        |
| Bleeding - vaginal NOS                                                                          | 371562017        | 289530006        | 2983956017       |
| Haemarthrosis - elbow joint                                                                     | 989481000006113  | 202405009        | 989481000006113  |
| Haemorrhage in uterus                                                                           | 3116591000006113 | 38280009         | 489888015        |

|                                                                                |                   |                 |                   |
|--------------------------------------------------------------------------------|-------------------|-----------------|-------------------|
| Finding of bleeding of nose                                                    | 5270651000006118  | 249366005       | 1224241013        |
| Epidural intracranial hemorrhage                                               | 3850561000006118  | 82999001        | 2916559017        |
| Evacuation of haematoma                                                        | 279096018         | 118441006       | 444575012         |
| Choroidal hemorrhage and rupture                                               | 4771941000006116  | 193474002       | 297941013         |
| Intrarenal hematoma                                                            | 4789541000006116  | 197813005       | 304144013         |
| Breast hematoma due to non-traumatic cause                                     | 4791271000006114  | 198123000       | 304631019         |
| Haemopericardium as current complication following acute myocardial infarction | 813961000006116   | 194862000       | 299816014         |
| Packing for bleeding                                                           | 4716041000006116  | 182605004       | 282263017         |
| Nosebleed/epistaxis symptom                                                    | 297191000006112   | 249366005       | 372073016         |
| O/E - vitreous haemorrhages                                                    | 255341010         | 163990004       | 255341010         |
| Acute posthemorrhagic anemia                                                   | 5500911000006114  | 267530009       | 399227018         |
| Anemia due to acute blood loss                                                 | 5500941000006113  | 267530009       | 2536037015        |
| Haemarthrosis of the ankle and foot                                            | 400243017         | 267948008       | 400243017         |
| Epistaxis control - cautery                                                    | 860711000006112   | 287382003       | 860711000006112   |
| Retrolbulbar haemorrhage                                                       | 298916015         | 194179009       | 298916015         |
| Extradural h'ge inj no open intracran wnd+1-24hr loss consc                    | 660061000006118   | 43216008        | 72101019          |
| Unspecified choroidal haemorrhage                                              | 11989321000006119 | 122003          | 11989321000006119 |
| Postmenopausal bleeding                                                        | 127423017         | 76742009        | 127423017         |
| Epistaxis control - suture                                                     | 5724381000006115  | 287400009       | 426932018         |
| Hematoma AND contusion of liver with open wound into abdominal cavity          | 2843231000006111  | 21580006        | 36197018          |
| Pulmonary haemorrhage                                                          | 317409016         | 78144005        | 503767018         |
| Control of epistaxis                                                           | 3076651000006115  | 35807001        | 59731016          |
| Drainage of haematoma of nasal septum                                          | 2753321000006117  | 15962000        | 477593011         |
| Epistaxis control NOS                                                          | 860741000006111   | 35807001        | 860741000006111   |
| Pericardial haematoma evacuat.                                                 | 865621000006117   | 562891000000104 | 865621000006117   |
| Subperiosteal haematoma                                                        | 6552151000006115  | 395183000       | 1476344017        |
| Spontaneous haemarthrosis                                                      | 5650711000006114  | 281370001       | 419361012         |
| Epistaxis control                                                              | 5724171000006115  | 287374003       | 426905011         |
| Persistent frank haematuria                                                    | 5656791000006118  | 281855006       | 419981019         |
| Subcapsular haematoma of spleen                                                | 5065651000006112  | 234507003       | 351359017         |

**Table S39. Bleeding at other anatomy sites HES (ICD10) codes**

| ICD10 codes | Term                                                                                        |
|-------------|---------------------------------------------------------------------------------------------|
| D62         | Acute posthaemorrhagic anaemia                                                              |
| D68.3       | Haemorrhagic disorder due to circulating anticoagulants                                     |
| D69.8       | Other specified haemorrhagic conditions                                                     |
| D69.9       | Haemorrhagic condition, unspecified                                                         |
| H11.3       | Conjunctival haemorrhage                                                                    |
| H21.0       | Hyphema                                                                                     |
| H31.3       | Choroidal haemorrhage and rupture                                                           |
| H35.6       | Retinal haemorrhage                                                                         |
| H43.1       | Vitreous haemorrhage                                                                        |
| H45.0       | Vitreous haemorrhage in diseases classified elsewhere                                       |
| H92.2       | Otorrhagia                                                                                  |
| I23.0       | Haemopericardium as current complication following acute myocardial infarction              |
| I31.2       | Haemopericardium, not elsewhere classified                                                  |
| I71.1       | Thoracic aortic aneurysm, ruptured                                                          |
| I71.3       | Abdominal aortic aneurysm, ruptured                                                         |
| I71.5       | Thoracoabdominal aortic aneurysm, ruptured                                                  |
| J94.2       | Haemothorax                                                                                 |
| K76.2       | Central haemorrhagic necrosis of liver                                                      |
| K92.0       | Haematemesis                                                                                |
| K92.1       | Melaena                                                                                     |
| M25.0       | Haemarthrosis                                                                               |
| M25.00      | Haemarthrosis, unspecified joint                                                            |
| M25.01      | Haemarthrosis, shoulder                                                                     |
| M25.02      | Haemarthrosis, elbow                                                                        |
| M25.03      | Haemarthrosis, wrist                                                                        |
| M25.04      | Haemarthrosis, hand                                                                         |
| M25.05      | Haemarthrosis, hip                                                                          |
| M25.06      | Haemarthrosis, knee                                                                         |
| M25.07      | Haemarthrosis, ankle and foot                                                               |
| M25.08      | Haemarthrosis, other specified site                                                         |
| N02.0       | Recurrent and persistent haematuria. Minor glomerular abnormality                           |
| N02.1       | Recurrent and persistent haematuria. Focal and segmental glomerular lesions                 |
| N02.2       | Recurrent and persistent haematuria. Diffuse membranous glomerulonephritis                  |
| N02.3       | Recurrent and persistent haematuria. Diffuse mesangial proliferative glomerulonephritis     |
| N02.4       | Recurrent and persistent haematuria. Diffuse endocapillary proliferative glomerulonephritis |
| N02.5       | Recurrent and persistent haematuria. Diffuse mesangiocapillary glomerulonephritis           |
| N02.6       | Recurrent and persistent haematuria. Dense deposit disease                                  |

|       |                                                                              |
|-------|------------------------------------------------------------------------------|
| N02.7 | Recurrent and persistent haematuria. Diffuse crescentic glomerulonephritis   |
| N02.8 | Recurrent and persistent haematuria. Other                                   |
| N02.9 | Recurrent and persistent haematuria. Unspecified                             |
| N42.1 | Congestion and haemorrhage of prostate                                       |
| N83.6 | Hematosalpinx                                                                |
| N83.7 | Haematoma of broad ligament                                                  |
| N85.7 | Hematometra                                                                  |
| N89.7 | Hematocolpos                                                                 |
| N93.0 | Postcoital and contact bleeding                                              |
| N93.8 | Other specified abnormal uterine and vaginal bleeding                        |
| N93.9 | Abnormal uterine and vaginal bleeding, unspecified                           |
| N95.0 | Postmenopausal bleeding                                                      |
| R04.0 | Epistaxis                                                                    |
| R04.1 | Haemorrhage from throat                                                      |
| R04.2 | Haemoptysis                                                                  |
| R04.8 | Haemorrhage from other sites in respiratory passages                         |
| R04.9 | Haemorrhage from respiratory passages, unspecified                           |
| R31   | Unspecified haematuria                                                       |
| R58   | Haemorrhage, not elsewhere classified                                        |
| S26.0 | Injury of heart with haemopericardium                                        |
| T81.0 | Haemorrhage and haematoma complicating a procedure, not elsewhere classified |

**Table S40. Hospitalisation Aurum codes**

| Term                                                                        | Medcode ID        | SNOMED CT Concept ID | SNOMED CT Description ID |
|-----------------------------------------------------------------------------|-------------------|----------------------|--------------------------|
| Admit geriatric emergency                                                   | 12482071000006111 | 183457004            | 283525018                |
| Admission to colorectal surgery department                                  | 5940241000006118  | 305422004            | 447841011                |
| Admission by surgeon                                                        | 5938551000006116  | 305293001            | 447669018                |
| Night hospital care                                                         | 283555013         | 183483009            | 283555013                |
| Refer to hospital casualty                                                  | 283795013         | 183659006            | 283795013                |
| Admission to medical department                                             | 5939401000006112  | 305354007            | 447756010                |
| Admission to ophthalmology department                                       | 5940281000006112  | 305426001            | 447845019                |
| Rheumatology emergency hospital admission                                   | 283536013         | 183465001            | 3082921015               |
| Discharge from Inpatient Care                                               | 8049681000006116  | 163391000000107      | 214171000000113          |
| Emergency hospital admission to general surgical service                    | 8453071000006119  | 1078041000000108     | 2702931000000114         |
| Patient in hospital                                                         | 284397011         | 184091000            | 284397011                |
| Patient died in hospital                                                    | 284637019         | 184297005            | 284637019                |
| Refer to hospital                                                           | 2476476011        | 310449005            | 2476476011               |
| Discharged from accident and emergency                                      | 2549670013        | 417119002            | 2549670013               |
| Discharge summary awaited                                                   | 21521000000115    | 17301000000103       | 21521000000115           |
| Admit to intensive care unit                                                | 447747019         | 305351004            | 447747019                |
| Admission by assistant GP                                                   | 967731000000117   | 449201000000100      | 967731000000117          |
| Hospital admission, short-term                                              | 3321091000006111  | 50699000             | 84496015                 |
| Place to which Pt admitted (Gen Surg)                                       | 1594641000006111  | 1594641000006107     | 1594641000006111         |
| Hospital admission, transfer from other hospital or health care facility    | 2571671000006112  | 4563007              | 7859016                  |
| Inpatient stay 6 days                                                       | 783711000006116   | 183804009            | 284001011                |
| Admission by locum general practitioner                                     | 1823591000006110  | 476981000000106      | 1690371000000119         |
| Hospital inpatient note                                                     | 1898071000006117  | 1898071000006101     | 1898071000006117         |
| Discharge to rented accommodation                                           | 1951041000006116  | 1951041000006100     | 1951041000006116         |
| Hospital Inpatient                                                          | 1563381000006113  | 1563381000006109     | 1563381000006113         |
| Accident and Emergency department discharge to neonatal intensive care unit | 8439411000006116  | 1066401000000108     | 2680731000000115         |
| Place to which Pt admitted (Ophth)                                          | 1598011000006110  | 1598011000006106     | 1598011000006110         |
| Hematology emergency hospital admission                                     | 4723611000006111  | 183470008            | 3082879019               |
| Vascular surgery emergency hospital admission                               | 7517441000006118  | 699122005            | 7517441000006118         |
| Admission by co-operative general practitioner                              | 8129421000006110  | 388751000000101      | 8129421000006110         |
| Discharged from private hospital                                            | 4725511000006111  | 183670004            | 4725511000006111         |
| Emergency department discharge to ICU (intensive care unit)                 | 8439381000006119  | 1066391000000105     | 2678241000000110         |
| Post hospital discharge followed up within 3 days                           | 2391861000000116  | 933601000000101      | 2391861000000116         |
| Admit trauma emergency                                                      | 12482281000006119 | 183463008            | 283534011                |
| Post-operative assessment at 4-6 hours after secondary care discharge       | 1628141000006112  | 298941000000105      | 528521000000113          |
| Admission by deputising general practitioner                                | 1845391000006119  | 395581000000108      | 962331000000116          |
| Ophthalmological emergency hospital admission                               | 4723471000006117  | 183464002            | 4723471000006117         |
| Admit cardiology emergency                                                  | 12482021000006110 | 313385005            | 457274011                |

|                                                                         |                   |                  |                  |
|-------------------------------------------------------------------------|-------------------|------------------|------------------|
| Discharged - treatment completed                                        | 968851000006112   | 968851000006108  | 968851000006112  |
| [RFC] Contact after hospital discharge/ A&E visit                       | 910381000006112   | 910381000006108  | 910381000006112  |
| Refer to hospital eye casualty                                          | 184781000006115   | 183661002        | 283798010        |
| Death in hospital                                                       | 608281000006119   | 183676005        | 283820019        |
| Admission to accident and emergency department                          | 1230914014        | 50849002         | 1230914014       |
| Admission to neurological intensive care unit                           | 283516012         | 183448005        | 2900917012       |
| Cardiothoracic emergency hospital admission                             | 283549015         | 183477006        | 3082969017       |
| Inpatient stay 5 days                                                   | 783701000006119   | 183803003        | 284000012        |
| Admission by orthopaedic surgeon                                        | 5938821000006111  | 305314005        | 447700011        |
| Admit other unit                                                        | 949781000006113   | 949781000006109  | 949781000006113  |
| Emergency hospital admission to general medical service                 | 8453341000006112  | 1078291000000109 | 2703431000000113 |
| Admission to ward                                                       | 5939171000006112  | 305342007        | 447733018        |
| Discharge from hospital                                                 | 5976961000006114  | 308283009        | 451609018        |
| Admission to gastroenterology department                                | 5939531000006117  | 305367005        | 447769014        |
| Facilitated early discharge from hospital                               | 726311000000112   | 343961000000102  | 726311000000112  |
| Admission by ophthalmologist                                            | 5938791000006119  | 305312009        | 447696015        |
| Hospital inpatient report                                               | 62131000000111    | 24661000000108   | 62131000000111   |
| Discharge from intermediate care                                        | 62671000000115    | 25131000000105   | 62671000000115   |
| Urology emergency hospital admission                                    | 4723551000006111  | 183468004        | 4723551000006111 |
| Admission to gastrointestinal surgery department                        | 5940211000006117  | 305419001        | 447838019        |
| Admission by casualty doctor                                            | 5937711000006113  | 305226003        | 447581010        |
| Discharge to hospital at home service                                   | 8439271000006114  | 1066351000000102 | 2678131000000114 |
| Admit vascular surgery emergency                                        | 12491011000006112 | 699122005        | 2982822015       |
| Admission to respiratory intensive care unit                            | 4723181000006114  | 183447000        | 4723181000006114 |
| Date Pt admitted (Musc/Skel)                                            | 1596111000006113  | 1596111000006109 | 1596111000006113 |
| Place to which Pt admitted (Musc/Skel)                                  | 1596121000006117  | 1596121000006101 | 1596121000006117 |
| Renal medicine emergency hospital admission                             | 4723701000006118  | 183475003        | 4723701000006118 |
| Emergency department discharge to ambulatory emergency care service     | 8439251000006116  | 1066341000000100 | 2678111000000118 |
| Emergency room admission                                                | 3323561000006114  | 50849002         | 84735018         |
| Discharge letter faxed to general practitioner                          | 1756601000006113  | 1756601000006109 | 1756601000006113 |
| [V]Delayed discharge - social services                                  | 1227761013        | 309568009        | 453018012        |
| Discharge to care home                                                  | 1951031000006114  | 1951031000006105 | 1951031000006114 |
| Discharge to other establishment                                        | 1951251000006111  | 1951251000006107 | 1951251000006111 |
| Discharge to acute hospital                                             | 1951201000006112  | 1951201000006108 | 1951201000006112 |
| Cardiothoracic emergency hospital admission                             | 4723741000006116  | 183477006        | 4723741000006116 |
| Acute secondary care intervention on development of symptoms            | 2180221000000114  | 840121000000102  | 2180221000000114 |
| Discharge letter given to patient                                       | 1693771000000110  | 763571000000107  | 1693771000000110 |
| Hospital discharge letter received                                      | 2343861000000113  | 911911000000100  | 2343861000000113 |
| Accident and Emergency department discharge to CCU (coronary care unit) | 8439331000006115  | 1066371000000106 | 2680701000000114 |
| Neurology emergency hospital admission                                  | 4723531000006116  | 183467009        | 4723531000006116 |
| Admission by co-op GP                                                   | 12491231000006111 | 388751000000101  | 851091000000111  |

|                                                                              |                   |                  |                  |
|------------------------------------------------------------------------------|-------------------|------------------|------------------|
| Admission by accident and emergency doctor                                   | 447580011         | 305226003        | 1775689013       |
| Trauma emergency hospital admission                                          | 4723451000006110  | 183463008        | 4723451000006110 |
| Admission to cardiac intensive care unit                                     | 4723161000006116  | 183446009        | 4723161000006116 |
| Discharge from A & E service                                                 | 5957881000006110  | 306563004        | 1785121019       |
| Delayed discharge to nursing home                                            | 283813014         | 183672007        | 283813014        |
| Inpatient care                                                               | 1488379018        | 394656005        | 1488379018       |
| Urology emergency hospital admission                                         | 283539018         | 183468004        | 3082876014       |
| Place to which Pt admitted (General Medicine)                                | 1594091000006112  | 1594091000006108 | 1594091000006112 |
| Long stay hospital inpatient                                                 | 736561000006112   | 160741006        | 250569018        |
| Inpatient stay longer than 12 hours                                          | 783601000006114   | 183798007        | 283995016        |
| Place to which Pt admitted (Gastro)                                          | 1593541000006113  | 1593541000006109 | 1593541000006113 |
| Discharge from Accident and Emergency service                                | 5957861000006117  | 306563004        | 1775696010       |
| Admission to cardiology department                                           | 5939431000006116  | 305357000        | 447759015        |
| Inpatient surgery care                                                       | 3524772015        | 736774000        | 3524772015       |
| Discharge from adult intensive care service                                  | 5957951000006111  | 306569000        | 449638012        |
| Emergency hospital admission to gastroenterology service                     | 8453311000006113  | 1078261000000103 | 2703371000000116 |
| Discharge by Accident and Emergency doctor                                   | 5955681000006119  | 306390007        | 1775695014       |
| Admit haematology emergency                                                  | 12482091000006112 | 183470008        | 283541017        |
| Emergency hospital admission to thoracic surgery service                     | 8453021000006115  | 1077991000000101 | 2702801000000111 |
| Discharge to day ward                                                        | 5959671000006119  | 306707002        | 449818014        |
| Discharged from inpatient care                                               | 283805013         | 183667003        | 283805013        |
| Emergency hospital admission to accident and emergency service               | 8458471000006117  | 1082421000000101 | 2712531000000116 |
| Neurology emergency hospital admission                                       | 283538014         | 183467009        | 3082917010       |
| Admission by ear, nose and throat surgeon                                    | 5938651000006115  | 305302002        | 447682014        |
| Inpatient Care and Treatment Review                                          | 8433711000006113  | 1060741000000104 | 2666481000000111 |
| Hospital inpatient                                                           | 397755014         | 266938001        | 397755014        |
| Admit to respiratory ITU                                                     | 12482271000006117 | 183447000        | 283515011        |
| Admission by urologist                                                       | 5938901000006112  | 305320006        | 447707014        |
| 24 hours post admission                                                      | 5650851000006116  | 281380002        | 419373012        |
| Admission to neurological intensive care unit                                | 4723201000006110  | 183448005        | 4723201000006110 |
| Refer to hospital casualty NOS                                               | 283801016         | 183659006        | 283795013        |
| Accident and Emergency department discharge to SCBU (special care baby unit) | 8439361000006112  | 1066381000000108 | 2680741000000112 |
| Vascular surgery emergency hospital admission                                | 1137891000000117  | 699122005        | 3082834018       |
| Admission with abdominal symptoms                                            | 1838001000006117  | 1838001000006101 | 1838001000006117 |
| Date admit other unit                                                        | 949961000006117   | 949961000006101  | 949961000006117  |
| DOA (dead on arrival) at hospital                                            | 3528421000006114  | 63238001         | 2121181000000118 |
| Discharged from community hospital                                           | 1562411000000110  | 712671000000101  | 1562411000000110 |
| Admit hospital emergency NOS                                                 | 283552011         | 183452005        | 283520011        |
| Admission by general practitioner                                            | 5937781000006118  | 305230000        | 2692897015       |
| Post-operative assessment at 12-24 hours after secondary care discharge      | 1627141000006113  | 298971000000104  | 528581000000114  |



|                                                                          |                   |                  |                  |
|--------------------------------------------------------------------------|-------------------|------------------|------------------|
| Discharged from hospital                                                 | 283803018         | 183665006        | 283803018        |
| Post-operative assessment at 6 weeks after secondary care discharge      | 1768661000006118  | 760301000000104  | 1681501000000110 |
| Post hospital discharge medication reconciliation with medical notes     | 1753671000006114  | 730061000000107  | 1601761000000119 |
| Appropriate non-elective hospital admission                              | 1955941000006117  | 1955941000006101 | 1955941000006117 |
| Accident and Emergency department discharge to ICU (intensive care unit) | 8439391000006116  | 1066391000000105 | 2680721000000117 |
| Admission to hospital                                                    | 1227951014        | 32485007         | 1227951014       |
| Discharge letter emailed to general practitioner                         | 1706631000000118  | 766251000000108  | 1706631000000118 |
| Inpatient stay 3 days                                                    | 783681000006117   | 183801001        | 283998019        |
| Discharge letter sent to GP (general practitioner)                       | 8090731000006111  | 294331000000109  | 1676661000000111 |
| Geriatric emergency hospital admission                                   | 283525018         | 183457004        | 3082885014       |
| Admission to cardiac intensive care unit                                 | 283514010         | 183446009        | 2901401018       |
| Inpatient stay 2 days                                                    | 783671000006115   | 183800000        | 283997012        |
| Patient self-discharge                                                   | 242581000006111   | 183955003        | 284179014        |
| Adjustment reaction due to hospitalisation                               | 461701000006114   | 192065003        | 295515011        |
| Discharge to private nursing home                                        | 5959551000006111  | 306695007        | 449802015        |
| Trauma emergency hospital admission                                      | 283534011         | 183463008        | 3082906014       |
| Renal medicine emergency hospital admission                              | 283547018         | 183475003        | 3082929018       |
| Admit to intensive c.u. NOS                                              | 283519017         | 305351004        | 447746011        |
| Discharge to tertiary referral hospital                                  | 5959621000006115  | 306703003        | 449811015        |
| Admission to neurology department                                        | 5939691000006119  | 305379005        | 447786015        |
| Oral surgical emergency hospital admission                               | 4723661000006114  | 183473005        | 4723661000006114 |
| Discharged from hospital within 6 hours of delivery                      | 283814015         | 183673002        | 283814015        |
| Admission to department                                                  | 5939271000006117  | 305349003        | 447743015        |
| Cardiology emergency hospital admission                                  | 457274011         | 313385005        | 3082972012       |
| Inpatient stay 4 days                                                    | 783691000006119   | 183802008        | 283999010        |
| Admission to stroke unit                                                 | 449935012         | 306803007        | 449935012        |
| Admission to general medical department                                  | 5939541000006110  | 305368000        | 447770010        |
| Discharge report                                                         | 63261000000118    | 25571000000103   | 63261000000118   |
| Admission by GP registrar                                                | 851111000000118   | 424211000000104  | 851111000000118  |
| Received hospital death discharge letter                                 | 193281000006110   | 184277000        | 284626015        |
| Ophthalmological emergency hospital admission                            | 462221000006116   | 183464002        | 3082894015       |
| Discharge to ward                                                        | 5959661000006114  | 306706006        | 449817016        |
| Emergency department discharge to high dependency unit                   | 8439281000006112  | 1066361000000104 | 2678161000000116 |
| Admission by A & E doctor                                                | 5937721000006117  | 305226003        | 447582015        |
| Patient transfer, in-hospital, service-to-service                        | 1846191000006113  | 57976004         | 96383017         |
| Discharged from private hosp'l                                           | 12484901000006111 | 183670004        | 283811011        |
| Admission by own GP                                                      | 1823541000006118  | 305231001        | 1823541000006118 |
| Admission by associate GP (general practitioner)                         | 1823571000006114  | 437171000000107  | 1674951000000110 |
| Admission by assistant GP (general practitioner)                         | 1823561000006119  | 449201000000100  | 1674411000000118 |
| Patient transfer from hospital to hospital                               | 1825121000006116  | 239531000000108  | 1825121000006116 |
| Neurosurgical emergency hospital admission                               | 4723721000006111  | 183476002        | 4723721000006111 |

|                                                                                  |                   |                  |                  |
|----------------------------------------------------------------------------------|-------------------|------------------|------------------|
| Discharge letter emailed to general practitioner                                 | 1756571000006118  | 1756571000006102 | 1756571000006118 |
| Post hospital discharge medication reconciliation with patient                   | 1753661000006119  | 730021000000104  | 1601671000000117 |
| Hospital death disch. NOS                                                        | 284628019         | 309039003        | 452370013        |
| Hospital death discharge notification                                            | 828231000006117   | 184274007        | 284623011        |
| Admit to ITU                                                                     | 462351000006119   | 305351004        | 447746011        |
| Admit surgical emergency unsp.                                                   | 462321000006111   | 183452005        | 283520011        |
| Admit medical emergency unsp.                                                    | 462181000006113   | 183452005        | 283520011        |
| Hospital re-admission                                                            | 1782016           | 417005           | 1782016          |
| Admission to respiratory intensive care unit                                     | 283515011         | 183447000        | 2902327017       |
| Haematology emergency hospital admission                                         | 283541017         | 183470008        | 3082962014       |
| Inpatient stay 1 day                                                             | 783611000006112   | 183799004        | 283996015        |
| Accident and Emergency department discharge to ambulatory emergency care service | 8439261000006119  | 1066341000000100 | 2680751000000110 |
| Inpatient final discharge letter                                                 | 8271641000006116  | 824331000000106  | 2145271000000110 |
| Admission to general gastrointestinal surgery department                         | 5940221000006113  | 305420007        | 447839010        |
| Taking own discharge                                                             | 5957831000006114  | 306560001        | 449625016        |
| Reason for admission                                                             | 8310281000006117  | 886861000000108  | 2285241000000112 |
| Admission to adult intensive care unit                                           | 5939341000006118  | 305352006        | 447750016        |
| Admitted other                                                                   | 950751000006110   | 950751000006106  | 950751000006110  |
| Admission to respiratory medicine department                                     | 5939461000006113  | 305360007        | 447762017        |
| Admit ENT emergency                                                              | 12482061000006116 | 183462003        | 283533017        |
| Referral to inpatient unit                                                       | 2729321000000110  | 1089301000000106 | 2729321000000110 |
| On admission                                                                     | 5611821000006112  | 278307001        | 415178019        |
| [V]Delayed discharge - nursing home vacancy awaited                              | 1227760014        | 183930009        | 284147017        |
| Admission to thoracic medicine department                                        | 5939451000006111  | 305359002        | 447761012        |
| A&E attendance - discharged no follow up treatment required                      | 1981781000006116  | 1981781000006100 | 1981781000006116 |
| Admission by GP                                                                  | 447587014         | 305230000        | 447587014        |
| Discharge to community hospital                                                  | 449808016         | 306701001        | 449808016        |
| Premature hospital discharge                                                     | 1918091000006114  | 1918091000006105 | 1918091000006114 |
| Admit cardiothoracic emergency                                                   | 12482031000006113 | 183477006        | 283549015        |
| Date Pt admitted (Cardio)                                                        | 1592091000006115  | 1592091000006104 | 1592091000006115 |
| Emergency department discharge to coronary care unit                             | 8439311000006114  | 1066371000000106 | 2678191000000110 |
| Emergency department discharge to CCU (coronary care unit)                       | 8439321000006118  | 1066371000000106 | 2678181000000113 |
| Discharged from community hospital                                               | 1744481000006110  | 1744481000006106 | 1744481000006110 |
| Patient transfer from hospital to hospital                                       | 1156751000000119  | 239531000000108  | 1156751000000119 |
| Admission by GP partner                                                          | 1823551000006116  | 305232008        | 1823551000006116 |
| Admission by GP (general practitioner) registrar                                 | 1823581000006112  | 424211000000104  | 1675721000000119 |
| Premature hospital discharge                                                     | 2444251000000115  | 958801000000109  | 2444251000000115 |
| Discharge letter faxed to general practitioner                                   | 1693731000000113  | 763551000000103  | 1693731000000113 |
| Place to which Pt admitted (Cardio)                                              | 1592101000006114  | 1592101000006105 | 1592101000006114 |
| Date Pt discharged (Gastro)                                                      | 1593561000006112  | 1593561000006108 | 1593561000006112 |

|                                                                           |                   |                  |                  |
|---------------------------------------------------------------------------|-------------------|------------------|------------------|
| Date Pt admitted (General Medicine)                                       | 1594081000006114  | 1594081000006105 | 1594081000006114 |
| Admit ophthalmological emergency                                          | 12482131000006114 | 183464002        | 283535012        |
| Admit anticoagulation emergency                                           | 2198591000000112  | 848101000000108  | 2198591000000112 |
| Gynaecological emergency hospital admission                               | 4723341000006117  | 183459001        | 4723341000006117 |
| Admit neurosurgical emergency                                             | 12482111000006115 | 183476002        | 283548011        |
| Admit to cardiac ITU                                                      | 12482241000006113 | 183446009        | 283514010        |
| Admitted                                                                  | 949761000006115   | 949761000006104  | 949761000006115  |
| Inpatient stay 12 days                                                    | 783641000006111   | 183810009        | 284007010        |
| ENT emergency hospital admission                                          | 283533017         | 183462003        | 3082975014       |
| Admission to oral surgery department                                      | 5940291000006110  | 305427005        | 447847010        |
| Orthopaedic emergency hospital admission                                  | 283532010         | 183461005        | 3082948019       |
| Discharge letter                                                          | 8270971000006113  | 823701000000103  | 2143921000000116 |
| Emergency hospital admission to stroke service                            | 8453821000006113  | 1078671000000108 | 2704231000000114 |
| Admission to hepatobiliary surgical department                            | 5940261000006119  | 305424003        | 447843014        |
| Discharge letter offered to patient                                       | 8306951000006115  | 879761000000102  | 2269661000000111 |
| Emergency department discharge to intensive care unit                     | 8439371000006117  | 1066391000000105 | 2678251000000113 |
| Discharge summary                                                         | 1212385013        | 373942005        | 1212385013       |
| Discharge from intensive care service                                     | 5957941000006114  | 306568008        | 449637019        |
| Admission to gynaecology department                                       | 5939761000006118  | 305385003        | 447793016        |
| Hospital admission, emergency, from emergency room, medical nature        | 2816831000006113  | 19951005         | 33588016         |
| Discharge to residential home                                             | 449798016         | 306691003        | 449798016        |
| In-patient admission                                                      | 841531000006114   | 841531000006105  | 841531000006114  |
| Admission by GP locum                                                     | 851101000000115   | 476981000000106  | 851101000000115  |
| Hospital admission note                                                   | 62121000000114    | 24651000000105   | 62121000000114   |
| Admission to emergency department                                         | 3323601000006114  | 50849002         | 2995318014       |
| Intervention - hospital admission                                         | 971111000006119   | 971111000006103  | 971111000006119  |
| Accident and Emergency department discharge to HDU (high dependency unit) | 8439301000006111  | 1066361000000104 | 2680711000000111 |
| Admission to adult ITU                                                    | 5939351000006116  | 305352006        | 447751017        |
| Admission by co-operative general practitioner                            | 851091000000111   | 388751000000101  | 1692241000000117 |
| Emergency department discharge to emergency department short stay ward    | 8439231000006111  | 1066331000000109 | 2678091000000111 |
| Date Pt admitted (Oral Medicine and Surgery)                              | 1597591000006112  | 1597591000006108 | 1597591000006112 |
| Date Pt admitted (Ophth)                                                  | 1598001000006112  | 1598001000006108 | 1598001000006112 |
| Inpatient stay 10 days                                                    | 783621000006116   | 183808007        | 284005019        |
| Discharge Summary (Full)                                                  | 1563121000006112  | 1563121000006108 | 1563121000006112 |
| Admission notification                                                    | 2304471000000113  | 895571000000108  | 2304471000000113 |
| Discharged from acute assessment unit                                     | 2172541000000112  | 836721000000102  | 2172541000000112 |
| ENT emergency hospital admission                                          | 4723421000006118  | 183462003        | 4723421000006118 |
| Discharge to nursing home                                                 | 449801010         | 306694006        | 449801010        |
| Awaiting hospital death discharge letter                                  | 500831000006114   | 184276009        | 284625016        |
| Ear, nose and throat emergency hospital admission                         | 4723441000006113  | 183462003        | 3082934019       |
| Reviewed at hospital                                                      | 265639016         | 763287008        | 3638423011       |

|                                                                                                  |                   |                  |                  |
|--------------------------------------------------------------------------------------------------|-------------------|------------------|------------------|
| Inpatient discharge summary received                                                             | 15051000000111    | 16831000000102   | 15051000000111   |
| Emergency hospital admission to intermediate care service                                        | 8453391000006115  | 1078331000000102 | 2703511000000118 |
| Inpatient stay 7 days                                                                            | 783721000006112   | 183805005        | 284002016        |
| Inpatient stay                                                                                   | 782791000006115   | 308540004        | 451902013        |
| Transfer of care from hospital                                                                   | 95461000006112    | 710112000        | 3043107011       |
| Long stay hospital inpatient                                                                     | 250569018         | 160741006        | 250569018        |
| Admission to high dependency unit                                                                | 6598861000006115  | 398162007        | 1777720019       |
| Admission to Inpatient Care                                                                      | 8101001000006119  | 313071000000104  | 566451000000110  |
| Admission to endocrinology department                                                            | 5939521000006115  | 305366001        | 447768018        |
| Admission by doctor                                                                              | 2476441014        | 305260005        | 2476441014       |
| Discharge to home                                                                                | 2901225012        | 306689006        | 2901225012       |
| Hospital patient                                                                                 | 397754013         | 266938001        | 397754013        |
| Admission to day ward                                                                            | 447734012         | 305343002        | 447734012        |
| Hospital admission, emergency, from emergency room, accidental injury                            | 2665021000006115  | 10378005         | 18064016         |
| Admission by associate GP                                                                        | 851081000000114   | 437171000000107  | 851081000000114  |
| Admission to private hospital                                                                    | 5939121000006111  | 305339001        | 447728017        |
| Place to which Pt admitted (Neuro)                                                               | 1596671000006113  | 1596671000006109 | 1596671000006113 |
| Admission to cardiac surgery department                                                          | 5940121000006115  | 305412005        | 447829016        |
| Admit oral surgical emergency                                                                    | 12482141000006116 | 183473005        | 283545014        |
| Inpatient stay 11 days                                                                           | 783631000006118   | 183809004        | 284006018        |
| Discharge letter given to patient                                                                | 1756581000006115  | 1756581000006104 | 1756581000006115 |
| Admit neurology emergency                                                                        | 12482101000006118 | 183467009        | 283538014        |
| Admit to neurological ITU                                                                        | 12482261000006112 | 183448005        | 283516012        |
| Follow-up appointment offered after hospital discharge                                           | 1882401000006115  | 1882401000006104 | 1882401000006115 |
| ICU - Admission to intensive care unit                                                           | 5939331000006111  | 305351004        | 447748012        |
| Date Pt admitted (Urology)                                                                       | 1599441000006110  | 1599441000006106 | 1599441000006110 |
| Orthopedic emergency hospital admission                                                          | 4723411000006114  | 183461005        | 3082890012       |
| Haematology emergency hospital admission                                                         | 4723591000006117  | 183470008        | 4723591000006117 |
| Admit urology emergency                                                                          | 12482291000006116 | 183468004        | 283539018        |
| Emergency department discharge to HDU (high dependency unit)                                     | 8439291000006110  | 1066361000000104 | 2678151000000119 |
| Date Pt admitted (Gastro)                                                                        | 1593531000006115  | 1593531000006104 | 1593531000006115 |
| Admission by general practitioner partner                                                        | 5937821000006112  | 305232008        | 2972101017       |
| Discharge to relative's home                                                                     | 449797014         | 306690002        | 449797014        |
| Cardiology emergency hospital admission                                                          | 6029451000006115  | 313385005        | 6029451000006115 |
| Review at hospital                                                                               | 265638012         | 763287008        | 3638423011       |
| Discharge letter sent to general practitioner                                                    | 517481000000119   | 294331000000109  | 517481000000119  |
| Discharged from private hospital                                                                 | 283811011         | 183670004        | 3029377018       |
| Seen in hospital ward                                                                            | 285196018         | 185212007        | 285196018        |
| Accident and Emergency department discharge to Accident and Emergency department short stay ward | 8439241000006118  | 1066331000000109 | 2680761000000113 |
| Death notification from hospital                                                                 | 608291000006116   | 184275008        | 284624017        |

|                                                          |                   |                  |                  |
|----------------------------------------------------------|-------------------|------------------|------------------|
| Inpatient stay 9 days                                    | 782781000006118   | 183807002        | 284004015        |
| Emergency hospital admission to endocrinology service    | 8453321000006117  | 1078271000000105 | 2703391000000117 |
| Discharge summary awaited                                | 1676631000006113  | 17301000000103   | 21521000000115   |
| Oral surgical emergency hospital admission               | 283545014         | 183473005        | 3082839011       |
| Plastic surgery emergency hospital admission             | 283543019         | 183471007        | 3082940014       |
| Neurosurgical emergency hospital admission               | 283548011         | 183476002        | 3082967015       |
| Date Pt admitted (Neuro)                                 | 1596661000006118  | 1596661000006102 | 1596661000006118 |
| Hospital admission, emergency, direct                    | 3779761000006116  | 78680009         | 130558011        |
| Long stay hospital                                       | 3016541000006111  | 32074000         | 1227906014       |
| Admission to orthopaedic department                      | 5940311000006114  | 305428000        | 447849013        |
| Admission by dental surgeon                              | 5938601000006119  | 305298005        | 447677019        |
| Admission by own general practitioner                    | 5937801000006119  | 305231001        | 2972278017       |
| Admission to surgical department                         | 5940081000006117  | 305408004        | 447825010        |
| Death in hospital                                        | 2769631000006119  | 16983000         | 28745019         |
| Admission to vascular surgery department                 | 5940401000006119  | 305435008        | 447857011        |
| Emergency hospital admission                             | 283520011         | 183452005        | 283520011        |
| Died in hospital                                         | 283820019         | 183676005        | 283820019        |
| Seen in hospital casualty                                | 285194015         | 185210004        | 285194015        |
| Admission for treatment                                  | 5931041000006116  | 304566005        | 446903011        |
| Inpatient                                                | 6897591000006113  | 416800000        | 2549330012       |
| Hospital admission, emergency, from emergency room       | 3696791000006119  | 73607007         | 122228018        |
| Admission by own GP                                      | 447588016         | 305231001        | 447588016        |
| Admission by GP partner                                  | 447589012         | 305232008        | 447589012        |
| Discharge to hospital                                    | 449806017         | 306699001        | 449806017        |
| Patient transfer, in-hospital                            | 3107571000006112  | 37729005         | 62934015         |
| Admission to intensive care unit                         | 5939301000006115  | 305351004        | 447749016        |
| Discharge summary sent to general practitioner           | 8237241000006114  | 763591000000106  | 1693801000000113 |
| Admit orthopaedic emergency                              | 12482151000006119 | 183461005        | 283532010        |
| Admitted: Hospital                                       | 1583651000006112  | 1583651000006108 | 1583651000006112 |
| Inappropriate non-elective hospital admission            | 1955951000006115  | 1955951000006104 | 1955951000006115 |
| Hospital admission, emergency, indirect                  | 1728541000006114  | 18083007         | 30547015         |
| Admission to acute assessment unit                       | 2172381000000110  | 836651000000103  | 2172381000000110 |
| Emergency hospital admission from walk-in centre         | 2186461000000117  | 842951000000109  | 2186461000000117 |
| Admission to A & E department                            | 3323591000006118  | 50849002         | 1230916011       |
| Discharge summary report                                 | 63271000000113    | 25581000000101   | 63271000000113   |
| Hospital admission                                       | 283592013         | 32485007         | 54238014         |
| Admission by physician                                   | 5938171000006116  | 305260005        | 447631011        |
| Hospital notified of death                               | 1780508019        | 401321000        | 1780508019       |
| A&E attendance - admitted to hospital bed/lodged patient | 1981761000006114  | 1981761000006105 | 1981761000006114 |
| Self-referral to hospital                                | 283832015         | 183687002        | 283832015        |
| Patient transfer, in-hospital, service-to-service        | 1824251000006116  | 57976004         | 1824251000006116 |

|                                                                                                           |                  |                  |                  |
|-----------------------------------------------------------------------------------------------------------|------------------|------------------|------------------|
| Discharge from Accident and Emergency service with advice for follow up treatment by general practitioner | 8368771000006114 | 989501000000106  | 2514921000000119 |
| Inpatient stay 8 days                                                                                     | 783731000006110  | 183806006        | 284003014        |
| Inpatient stay 14 days                                                                                    | 783661000006110  | 183812001        | 284009013        |
| Inpatient stay 13 days                                                                                    | 783651000006113  | 183811008        | 284008017        |
| Emergency room admission, died in emergency room                                                          | 3719361000006111 | 75004002         | 124573013        |
| Listed for Geriatrics admission                                                                           | 283967016        | 183774000        | 2668801012       |
| Admission to urology department                                                                           | 5940391000006116 | 305434007        | 447856019        |
| Admission to general surgical department                                                                  | 5940251000006116 | 305423009        | 447842016        |
| A&E attendance - discharged with follow up treatment by GP                                                | 1981771000006119 | 1981771000006103 | 1981771000006119 |
| Patient died in acute hospital                                                                            | 1964501000006119 | 1964501000006103 | 1964501000006119 |

**Table S41. Intracranial haemorrhage Aurum codes**

| Term                                                                      | Medcode ID        | SNOMED CT<br>Concept ID | SNOMED CT<br>Description ID |
|---------------------------------------------------------------------------|-------------------|-------------------------|-----------------------------|
| Intrapontine haemorrhage                                                  | 2622631000006114  | 7713009                 | 503468012                   |
| Cerebral hemisphere haemorrhage                                           | 3687811000006118  | 73020009                | 502318010                   |
| Traumatic subdural hematoma without open intracranial wound               | 6053291000006112  | 315046005               | 459512013                   |
| Subarachnoid haemorrhage following injury                                 | 391042012         | 450375008               | 2915309017                  |
| Cortical haemorrhage                                                      | 495394013         | 49422009                | 495394013                   |
| Internal capsule haemorrhage                                              | 496232015         | 52201006                | 496232015                   |
| Intracranial haemorrhage                                                  | 300298011         | 1386000                 | 475553012                   |
| Other cerebral haemorrhage following injury NOS                           | 320897016         | 450418003               | 2916363013                  |
| Basal ganglia haemorrhage                                                 | 503791000006114   | 195165005               | 300272017                   |
| Sequelae of intracerebral haemorrhage                                     | 300407010         | 195241001               | 300407010                   |
| Spontaneous subarachnoid haemorrhage                                      | 5518041000006112  | 270907008               | 405380011                   |
| Subarachnoid hemorrhage from carotid siphon and bifurcation               | 4777721000006118  | 195155004               | 300243018                   |
| Cerebellar hemorrhage                                                     | 3719851000006116  | 75038005                | 124627016                   |
| Cerebral infarction with haemorrhagic transformation                      | 1573101000006112  | 1573101000006108        | 1573101000006112            |
| Subdural intracranial haemorrhage                                         | 3071681000006119  | 35486000                | 2913218019                  |
| Traumatic intracranial subarachnoid haemorrhage                           | 5459271000006119  | 262955000               | 391048011                   |
| Subarachnoid intracranial haemorrhage                                     | 2841161000006110  | 21454007                | 2916299018                  |
| Subarachnoid haemorrhage following injury without open intracranial wound | 2950231000006111  | 28048009                | 2950231000006111            |
| Middle meningeal haemorrhage following injury                             | 702641000006119   | 30400005                | 484576014                   |
| Intracerebral haemorrhage with intraventricular haemorrhage               | 4777861000006119  | 195168007               | 2915438018                  |
| Subdural hemorrhage                                                       | 3071661000006112  | 35486000                | 59206018                    |
| Epidural hemorrhage                                                       | 3850501000006119  | 82999001                | 137667016                   |
| Cerebral haemorrhage                                                      | 884421000006119   | 274100004               | 884421000006119             |
| Subdural h'ge inj no open intracran wnd+>24hr LOC -restored               | 124121000006111   | 209947002               | 320752018                   |
| Subdural h'ge inj no open intracranial wound+<1hr loss consc              | 124181000006110   | 209947002               | 320752018                   |
| Cerebral haemorrhage NOS                                                  | 884451000006111   | 700251000000105         | 884451000006111             |
| Traumatic hemorrhage into subarachnoid space of neuraxis                  | 7377831000006117  | 450375008               | 2915309017                  |
| Closed traumatic subdural haemorrhage                                     | 320752018         | 209947002               | 320752018                   |
| Subarachnoid haemorrhage from carotid siphon and bifurcation              | 300244012         | 195155004               | 300244012                   |
| Haematoma of brain                                                        | 5898441000006118  | 301764006               | 443223014                   |
| SDH - Subdural haematoma                                                  | 4056891000006113  | 95453001                | 1217311015                  |
| Spontaneous subacute subdural hemorrhage                                  | 8089871000006114  | 291591000119107         | 2959496014                  |
| Traumatic subdural intracranial haemorrhage                               | 4854361000006118  | 209987007               | 2912530015                  |
| Subarachnoid hemorrhage                                                   | 12761901000006117 | 21454007                | 36011016                    |
| Cerebral haemorrhage NOS                                                  | 989211000006119   | 274100004               | 989211000006119             |
| Ruptured aneurysm of basilar artery                                       | 5597601000006115  | 277324009               | 413805016                   |

|                                                                           |                   |           |                   |
|---------------------------------------------------------------------------|-------------------|-----------|-------------------|
| Subarachnoid haemorrhage from middle cerebral artery aneurysm             | 5583021000006113  | 276280009 | 412353018         |
| External capsule haemorrhage                                              | 300276019         | 195167002 | 300276019         |
| Sequelae of intracerebral hemorrhage                                      | 4778351000006113  | 195241001 | 300408017         |
| Subdural hemorrhage following injury                                      | 4854341000006117  | 209987007 | 320838011         |
| Subdural h'ge inj no open intracranial wnd+>24 LOC +recovery              | 124171000006112   | 209947002 | 320752018         |
| Intrapontine hemorrhage                                                   | 2622641000006116  | 7713009   | 13755017          |
| Subdural haematoma evacuation                                             | 3469891000006117  | 59712006  | 498519016         |
| Other cerebral haemorrhage following injury                               | 320853015         | 450418003 | 2916363013        |
| Intracranial subarachnoid haemorrhage from vertebral artery               | 4777761000006112  | 195160000 | 2916525016        |
| ICH - intracerebral hemorrhage                                            | 12223131000006114 | 274100004 | 3673218019        |
| Intracerebral hemorrhage, multiple localized                              | 4777891000006110  | 195169004 | 300279014         |
| Intracerebral haemorrhage                                                 | 12223101000006118 | 274100004 | 3673215016        |
| Traumatic intracerebral hemorrhage                                        | 7378401000006111  | 450418003 | 2915288012        |
| [X]Other intracerebral haemorrhage                                        | 11919571000006110 | 274100004 | 11919571000006110 |
| Subarachnoid h'ge inj no open intracran wound + 1-24hr LOC                | 123421000006117   | 28048009  | 46957015          |
| Subarachnoid hemorrhage from basilar artery aneurysm                      | 5583111000006118  | 276284000 | 412362016         |
| Ruptured aneurysm of posterior inferior cerebellar artery                 | 5597611000006117  | 277325005 | 413807012         |
| Thalamic haemorrhage                                                      | 5011411000006113  | 230711001 | 345676013         |
| Haemorrhagic cerebral infarction                                          | 5011291000006119  | 230706003 | 345667018         |
| Intracranial haemorrhage following injury without open intracranial wound | 4198341000006113  | 111668007 | 189842012         |
| Pontine hemorrhage                                                        | 2622651000006119  | 7713009   | 13756016          |
| Evacuation of subdural haematoma                                          | 3469851000006111  | 59712006  | 498516011         |
| Pontine haemorrhage                                                       | 503469016         | 7713009   | 503469016         |
| Non-traumatic subdural hemorrhage                                         | 4777931000006118  | 195176009 | 2469434017        |
| Subdural haemorrhage                                                      | 2534198011        | 35486000  | 486181011         |
| Subarachnoid h'ge inj no open intracran wnd+>24 LOC+recovery              | 123401000006110   | 28048009  | 46957015          |
| Subarach h'ge inj no open intracran wnd+LOC unspec duration               | 123331000006114   | 28048009  | 46957015          |
| Subarach h'ge inj no open intracran wnd + concussion unspec               | 123311000006115   | 28048009  | 46957015          |
| Subarachnoid h'ge inj no open intracran wnd+no loss consc                 | 123411000006113   | 28048009  | 46957015          |
| Subarachnoid haemorrhage following injury without open intracranial wound | 402929011         | 28048009  | 483737017         |
| Cerebral haemorrhage following injury                                     | 12757911000006115 | 82894007  | 505322013         |
| Cerebral hemorrhage following injury                                      | 12757891000006117 | 82894007  | 505319011         |
| Traumatic intracranial hemorrhage                                         | 12757901000006118 | 82894007  | 505320017         |
| Right sided intracerebral haemorrhage, unspecified                        | 163261000006119   | 195168007 | 300277011         |
| [X]Other subarachnoid haemorrhage                                         | 300936018         | 21454007  | 481028017         |
| Cerebral haemorrhage                                                      | 122371000006118   | 274100004 | 409860011         |
| Other and unspecified intracranial haemorrhage                            | 300290016         | 62914000  | 104563015         |
| Traumatic cerebral haemorrhage                                            | 505324014         | 450418003 | 2916058017        |



|                                                                      |                   |                 |                 |
|----------------------------------------------------------------------|-------------------|-----------------|-----------------|
| Cerebral hemorrhage                                                  | 605471000006112   | 274100004       | 409859018       |
| Ventricular haemorrhage                                              | 2871241000006118  | 23276006        | 481581018       |
| Subarachnoid haemorrhage due to ruptured aneurysm                    | 5011581000006119  | 230719004       | 345695018       |
| Cerebral haemorrhage                                                 | 300939013         | 274100004       | 409860011       |
| Subdural haemorrhage following injury                                | 320836010         | 209987007       | 320836010       |
| Hemorrhage of medulla oblongata                                      | 7951281000006118  | 732923001       | 3467313018      |
| Lobar cerebral haemorrhage                                           | 345675012         | 230710000       | 345675012       |
| Ruptured berry aneurysm                                              | 300242011         | 195154000       | 300242011       |
| Sequelae of subarachnoid haemorrhage                                 | 300406018         | 195240000       | 300406018       |
| Subdural h'ge after injury                                           | 991811000006115   | 209987007       | 991811000006115 |
| [X]Intracerebral haemorrhage in hemisphere, unspecified              | 300956017         | 274100004       | 409860011       |
| Subdural h'ge inj no open intracranial wnd + unspec consc            | 124161000006117   | 209947002       | 320752018       |
| Subdural hemorrhage following injury without open intracranial wound | 4854171000006111  | 209947002       | 2915477015      |
| Pituitary haemorrhage                                                | 5111331000006119  | 237702003       | 356253018       |
| SAH - Subarachnoid hemorrhage                                        | 2841151000006113  | 21454007        | 1217630014      |
| Non-traumatic intracranial subdural haemorrhage                      | 4777951000006113  | 195176009       | 2913186018      |
| History of subarachnoid haemorrhage                                  | 4540691000006112  | 161515009       | 2986875019      |
| Subdural hemorrhage - nontraumatic                                   | 4777911000006112  | 195176009       | 300293019       |
| Intracerebral hemorrhage with intraventricular hemorrhage            | 4777871000006114  | 195168007       | 2916313015      |
| Intracranial hemorrhage following injury                             | 7378281000006118  | 450410005       | 2915467017      |
| Intracranial haemorrhage following injury                            | 12716261000006116 | 82894007        | 505321018       |
| Traumatic cranial subdural hematoma                                  | 5459251000006112  | 262952002       | 391039018       |
| Subdural intracranial hemorrhage                                     | 3071671000006117  | 35486000        | 2912630010      |
| Intracerebral haemorrhage NOS                                        | 300287010         | 274100004       | 2819959010      |
| Subdural h'ge inj no open intracranial wound+no loss consc           | 124191000006113   | 209947002       | 320752018       |
| Traumatic subdural hematoma                                          | 391035012         | 262952002       | 2912898019      |
| Cerebral hemorrhage                                                  | 13031191000006112 | 274100004       | 122371000006118 |
| Subdural hematoma                                                    | 4056881000006110  | 95453001        | 158107014       |
| Ruptured cerebral arteriovenous malformation                         | 5597281000006110  | 277299009       | 413775010       |
| Intracerebral haemorrhage, multiple localised                        | 4777881000006112  | 195169004       | 300280012       |
| Closed traumatic subdural hemorrhage                                 | 4854141000006115  | 209947002       | 320753011       |
| H/O subarachnoid hemorrhage                                          | 4540671000006111  | 161515009       | 251700011       |
| Subdural hematoma evacuation                                         | 3469881000006115  | 59712006        | 498518012       |
| Traumatic cerebral hemorrhage                                        | 7378441000006113  | 450418003       | 2916150010      |
| Intraventricular haemorrhage                                         | 2871271000006114  | 23276006        | 481580017       |
| Subarach h'ge inj no open intracran wnd+>24hrs LOC-restored          | 123321000006111   | 28048009        | 46957015        |
| Traumatic subdural haemorrhage                                       | 320835014         | 209987007       | 320835014       |
| Subdural haemorrhage - nontraumatic                                  | 300294013         | 195176009       | 300294013       |
| Nontraumatic intracerebral haemorrhage                               | 8089851000006116  | 291571000119106 | 3331108011      |
| Intraventricular hemorrhage                                          | 2871261000006119  | 23276006        | 39068015        |

|                                                                      |                   |           |                   |
|----------------------------------------------------------------------|-------------------|-----------|-------------------|
| SDH - Subdural hematoma                                              | 4056901000006112  | 95453001  | 1218799016        |
| Brain stem haemorrhage                                               | 4056931000006116  | 95454007  | 512138014         |
| Traumatic cranial subarachnoid hemorrhage                            | 5459281000006116  | 262955000 | 391046010         |
| Traumatic subdural intracranial hemorrhage                           | 4854351000006115  | 209987007 | 2912507014        |
| Subarachnoid hemorrhage from any perinatal cause                     | 2836991000006113  | 21202004  | 35631013          |
| Traumatic cranial subarachnoid haemorrhage                           | 5459301000006117  | 262955000 | 391049015         |
| Cerebral haemorrhage                                                 | 989201000006117   | 274100004 | 989201000006117   |
| Cerebral haemorrhage following injury NOS                            | 320852013         | 450418003 | 2916363013        |
| Evacuation of subdural hematoma                                      | 3469861000006113  | 59712006  | 99196013          |
| Subarachnoid haemorrhage from basilar artery aneurysm                | 5583101000006116  | 276284000 | 412361011         |
| Cerebral haemorrhage following injury                                | 505322013         | 450418003 | 2916363013        |
| Traumatic intracerebral haemorrhage                                  | 7378421000006118  | 450418003 | 2915664016        |
| External capsule hemorrhage                                          | 4777831000006111  | 195167002 | 300275015         |
| Haemorrhage of medulla oblongata                                     | 7951271000006116  | 732923001 | 3467314012        |
| Cerebral hemorrhage following injury                                 | 7378411000006114  | 450418003 | 2915447014        |
| Intracranial hemorrhage                                              | 2520541000006112  | 1386000   | 3421016           |
| Traumatic intracranial haemorrhage                                   | 12757921000006111 | 82894007  | 505323015         |
| Cerebral h'ge after injury                                           | 896531000006110   | 82894007  | 896531000006110   |
| Subarachnoid haemorrhage NOS                                         | 300257016         | 21454007  | 481028017         |
| Bulbar haemorrhage                                                   | 483988011         | 732923001 | 3467313018        |
| Traumatic cerebral haemorrhage                                       | 12757931000006114 | 82894007  | 505324014         |
| Sequelae of other nontraumatic intracranial haemorrhage              | 149551000006111   | 363302008 | 482447013         |
| Intracerebral haemorrhage in hemisphere, unspecified                 | 744921000006116   | 274100004 | 409860011         |
| Thalamic hemorrhage                                                  | 5011421000006117  | 230711001 | 345677016         |
| Sequelae of subarachnoid hemorrhage                                  | 4778331000006118  | 195240000 | 300405019         |
| Subdural haemorrhage                                                 | 884441000006114   | 195176009 | 884441000006114   |
| Cerebral hemorrhage                                                  | 12762021000006116 | 274100004 | 605471000006112   |
| Traumatic intracerebral haemorrhage                                  | 12757941000006116 | 82894007  | 2475153011        |
| Stroke due to intracerebral haemorrhage                              | 11903571000006110 | 274100004 | 11903571000006110 |
| Subarachnoid hemorrhage                                              | 428181000006115   | 21454007  | 481028017         |
| Subarachnoid haemorrhage from anterior communicating artery aneurysm | 5583061000006119  | 276282001 | 412357017         |
| Traumatic intracranial subarachnoid hemorrhage                       | 5459291000006118  | 262955000 | 391047018         |
| ICH - intracerebral haemorrhage                                      | 12223121000006111 | 274100004 | 3673217012        |
| Traumatic intracranial subdural hematoma                             | 5459241000006110  | 262952002 | 391038014         |
| Intracerebral hemorrhage                                             | 12223111000006115 | 274100004 | 3673216015        |
| Traumatic cranial subdural haematoma                                 | 5459221000006115  | 262952002 | 391036013         |
| Lobar cerebral hemorrhage                                            | 5011401000006110  | 230710000 | 345674011         |
| History of subarachnoid hemorrhage                                   | 4540681000006114  | 161515009 | 2986825016        |
| Intracerebral haemorrhage, intraventricular                          | 300277011         | 195168007 | 300277011         |
| Subdural h'ge inj no open intracran wnd+LOC unspec duration          | 124141000006116   | 209947002 | 320752018         |

|                                                                          |                   |                 |                  |
|--------------------------------------------------------------------------|-------------------|-----------------|------------------|
| Intracranial subarachnoid hemorrhage from vertebral artery               | 4777751000006110  | 195160000       | 2915522014       |
| Intracranial haemorrhage following injury                                | 7378271000006116  | 450410005       | 2915426010       |
| Subarachnoid hemorrhage from vertebral artery                            | 4777741000006113  | 195160000       | 300254011        |
| Subarachnoid haemorrhage from posterior communicating artery             | 123521000006118   | 21454007        | 36011016         |
| Intracerebral hemorrhage (ICH)                                           | 5560161000006111  | 274100004       | 2819960017       |
| Closed traumatic subdural intracranial hemorrhage                        | 4854151000006118  | 209947002       | 2912529013       |
| Subarachnoid h'ge inj no open intracran wnd+<1hr loss consc              | 123391000006113   | 28048009        | 46957015         |
| Traumatic subdural haematoma without open intracranial wound             | 459511018         | 315046005       | 459511018        |
| Non-traumatic intracranial subdural hemorrhage                           | 4777941000006111  | 195176009       | 2913068019       |
| Intracranial hemorrhage following injury                                 | 12757871000006118 | 82894007        | 137497019        |
| Intracranial haemorrhage NOS                                             | 12729181000006117 | 700251000000105 | 1530681000000111 |
| Evacuation of haematoma from cerebellum                                  | 265690015         | 171474001       | 265690015        |
| Evacuation of hematoma from cerebellum                                   | 4644251000006117  | 171474001       | 265691016        |
| Occipital subdural haematoma                                             | 7090271000006110  | 428561000       | 2694218015       |
| Cerebellar haemorrhage                                                   | 502878012         | 75038005        | 502878012        |
| Subarachnoid hemorrhage following injury without open intracranial wound | 11923791000006114 | 28048009        | 46957015         |
| Traumatic subdural haematoma                                             | 5459261000006114  | 262952002       | 2913152010       |
| [X]Subarachnoid haemorrhage from other intracranial arteries             | 300935019         | 21454007        | 36011016         |
| Basal ganglia hemorrhage                                                 | 4777811000006117  | 195165005       | 300271012        |
| Subdural h'ge inj no open intracran wnd+1-24hr loss consc                | 124131000006114   | 209947002       | 320752018        |
| Left sided intracerebral haemorrhage, unspecified                        | 748941000006115   | 274100004       | 409859018        |
| Subarachnoid haemorrhage from middle cerebral artery                     | 123511000006114   | 21454007        | 36011016         |
| Intracerebral haemorrhage, multiple localized                            | 746571000006116   | 195169004       | 300280012        |
| Traumatic cerebral hemorrhage                                            | 12757881000006115 | 82894007        | 137503010        |
| Right sided intracerebral haemorrhage, unspecified                       | 12722481000006116 | 308128006       | 451441015        |
| Intraparenchymal haematoma of brain                                      | 7134241000006113  | 431266005       | 2768748018       |
| Subarachnoid h'ge inj no open intracran wound + unspec consc             | 123431000006119   | 28048009        | 46957015         |
| Subarachnoid haemorrhage from posterior communicating artery aneurysm    | 5583081000006112  | 276283006       | 412360012        |
| Inferior cerebellar artery syndrome                                      | 3778011000006112  | 78569004        | 130376017        |
| SAH - Subarachnoid haemorrhage                                           | 2841141000006111  | 21454007        | 1216125018       |
| Ruptured cerebral aneurysm                                               | 5058411000006114  | 233983001       | 350578011        |
| Internal capsule hemorrhage                                              | 3346051000006110  | 52201006        | 86879010         |
| Anterior cerebral circulation haemorrhagic infarction                    | 5011331000006114  | 230707007       | 345668011        |
| Closed traumatic subdural intracranial haemorrhage                       | 4854161000006116  | 209947002       | 2912797018       |
| Subcortical hemorrhage                                                   | 2832661000006113  | 20908003        | 35158017         |
| Subdural haemorrhage following injury without open intracranial wound    | 4854181000006114  | 209947002       | 2915859018       |
| Subdural h'ge inj no open intracran wound+concussion unspec              | 124151000006119   | 209947002       | 320752018        |
| Subdural haematoma                                                       | 4056871000006112  | 95453001        | 512137016        |

|                                                             |                   |           |            |
|-------------------------------------------------------------|-------------------|-----------|------------|
| Middle meningeal hemorrhage following injury                | 2989681000006112  | 30400005  | 50888016   |
| Intracerebral hemorrhage, intraventricular                  | 4777851000006116  | 195168007 | 300278018  |
| Subarachnoid intracranial hemorrhage                        | 2841171000006115  | 21454007  | 2916568015 |
| Subarachnoid haemorrhage                                    | 481028017         | 21454007  | 481028017  |
| Non-traumatic subdural haemorrhage                          | 2475119012        | 195176009 | 2469010019 |
| Traumatic intracranial hemorrhage                           | 7378301000006119  | 450410005 | 2915928019 |
| H/O subarachnoid haemorrhage                                | 808111000006110   | 161515009 | 251701010  |
| Subarachnoid haemorrhage from basilar artery                | 123491000006115   | 276284000 | 412361011  |
| Traumatic subdural hemorrhage                               | 4854331000006110  | 209987007 | 320837018  |
| Subarachnoid haemorrhage from anterior communicating artery | 123481000006118   | 21454007  | 36011016   |
| Subarachnoid haemorrh from intracranial artery, unspecif    | 123441000006112   | 21454007  | 481028017  |
| Intracerebral haemorrhage (ICH)                             | 744901000006114   | 274100004 | 2819959010 |
| Traumatic intracerebral hemorrhage                          | 12757951000006119 | 82894007  | 2475363012 |
| Subarachnoid haemorrhage from vertebral artery              | 300253017         | 195160000 | 300253017  |
| Ruptured aneurysm of middle cerebral artery                 | 5597491000006112  | 277316004 | 413794017  |

**Table S42. Intracranial haemorrhage HES (ICD10) codes**

| ICD10 codes | Term                                                           |
|-------------|----------------------------------------------------------------|
| I60.0       | Subarachnoid haemorrhage from carotid siphon and bifurcation   |
| I60.1       | Subarachnoid haemorrhage from middle cerebral artery           |
| I60.2       | Subarachnoid haemorrhage from anterior communicating artery    |
| I60.3       | Subarachnoid haemorrhage from posterior communicating artery   |
| I60.4       | Subarachnoid haemorrhage from basilar artery                   |
| I60.5       | Subarachnoid haemorrhage from vertebral artery                 |
| I60.6       | Subarachnoid haemorrhage from other intracranial arteries      |
| I60.7       | Subarachnoid haemorrhage from intracranial artery, unspecified |
| I60.8       | Other subarachnoid haemorrhage                                 |
| I60.9       | Subarachnoid haemorrhage, unspecified                          |
| I61.0       | Intracerebral haemorrhage in hemisphere, subcortical           |
| I61.1       | Intracerebral haemorrhage in hemisphere, cortical              |
| I61.2       | Intracerebral haemorrhage in hemisphere, unspecified           |
| I61.3       | Intracerebral haemorrhage in brain stem                        |
| I61.4       | Intracerebral haemorrhage in cerebellum                        |
| I61.5       | Intracerebral haemorrhage, intraventricular                    |
| I61.6       | Intracerebral haemorrhage, multiple localized                  |
| I61.8       | Other intracerebral haemorrhage                                |
| I61.9       | Intracerebral haemorrhage, unspecified                         |
| I62.0       | Subdural haemorrhage (acute)(nontraumatic)                     |
| I62.1       | Nontraumatic extradural haemorrhage                            |
| I62.9       | Intracranial haemorrhage (nontraumatic), unspecified           |
| S06.4       | Epidural haemorrhage                                           |
| S06.5       | Traumatic subdural haemorrhage                                 |
| S06.6       | Traumatic subarachnoid haemorrhage                             |
| I69.0       | Sequelae of subarachnoid haemorrhage                           |
| I69.1       | Sequelae of intracerebral haemorrhage                          |
| I69.2       | Sequelae of other nontraumatic intracranial haemorrhage        |

**Table S43. Heart failure outcome Aurum codes**

| Term                                                                    | Medcode ID        | SNOMED CT Concept ID | SNOMED CT Description ID |
|-------------------------------------------------------------------------|-------------------|----------------------|--------------------------|
| Acute left ventricular failure                                          | 300190010         | 195114002            | 300190010                |
| Impaired left ventricular function                                      | 411506018         | 275514001            | 411506018                |
| O/E - pulmonary oedema                                                  | 253994013         | 162970000            | 253994013                |
| New York Heart Association Classification - Class II                    | 2616471011        | 421704003            | 2616471011               |
| Congestive heart failure due to valvular disease                        | 2675255018        | 426611007            | 2675255018               |
| Left ventricular cardiac dysfunction                                    | 2694523019        | 429589006            | 2694523019               |
| O/E - pulmonary edema                                                   | 4555461000006110  | 162970000            | 253993019                |
| CCF - Congestive cardiac failure                                        | 3182551000006115  | 42343007             | 493288018                |
| Chronic pulmonary oedema                                                | 494669012         | 46847001             | 494669012                |
| Pulmonary congestion and hypostasis NOS                                 | 301695010         | 196115007            | 301689014                |
| Admit heart failure emergency                                           | 12490061000006118 | 416683003            | 2549208013               |
| Acute congestive heart failure                                          | 18472010          | 10633002             | 18472010                 |
| COCM - Congestive cardiomyopathy                                        | 6615881000006112  | 399020009            | 1786620011               |
| Emergency hospital admission for heart failure                          | 6895651000006113  | 416683003            | 6895651000006113         |
| Heart failure as a complication of care                                 | 350484012         | 233924009            | 350484012                |
| Hypertensive heart disease NOS with CCF                                 | 741681000006111   | 64715009             | 107545013                |
| Congestive heart failure                                                | 70653017          | 42343007             | 70653017                 |
| Other transplantation of heart                                          | 12719481000006116 | 586351000000102      | 1300781000000114         |
| Left ventricular diastolic dysfunction                                  | 1489358014        | 395704004            | 1489358014               |
| Congestive cardiomyopathy                                               | 1778488011        | 399020009            | 1778488011               |
| Cardiac failure                                                         | 139482012         | 84114007             | 139482012                |
| Congestive heart disease                                                | 3182531000006110  | 42343007             | 70654011                 |
| Right ventricular failure                                               | 1816101000006113  | 367363000            | 490972013                |
| Postoperative pulmonary oedema                                          | 401870011         | 11468004             | 401870011                |
| Right heart failure                                                     | 206703015         | 128404006            | 206703015                |
| Heart failure with preserved ejection fraction                          | 7321121000006119  | 446221000            | 3496968011               |
| Congestive cardiac failure                                              | 3182541000006117  | 42343007             | 493287011                |
| CCM - Congestive cardiomyopathy                                         | 6615871000006114  | 399020009            | 1786619017               |
| Heart failure with preserved ejection fraction                          | 2227501000000110  | 446221000            | 2227501000000110         |
| Acute pulmonary oedema unspecified                                      | 301741013         | 40541001             | 492666016                |
| Left ventricular failure                                                | 141306010         | 85232009             | 141306010                |
| Chronic congestive heart failure                                        | 147247018         | 88805009             | 147247018                |
| Nonischemic congestive cardiomyopathy                                   | 7964821000006113  | 111000119104         | 2920819015               |
| Acute cardiac pulmonary oedema                                          | 6212521000006115  | 360371003            | 476096017                |
| Heart failure NOS                                                       | 395772015         | 84114007             | 139475013                |
| HF - Heart failure                                                      | 3868341000006118  | 84114007             | 1234906013               |
| Heart failure with reduced ejection fraction due to heart valve disease | 7573211000006119  | 703276005            | 3008139015               |
| History of heart failure in last year                                   | 5990971000006113  | 309634009            | 2986867013               |
| Cause of Death- Congestive Cardiac Failure                              | 1576321000006113  | 1576321000006109     | 1576321000006113         |

|                                                             |                  |                  |                  |
|-------------------------------------------------------------|------------------|------------------|------------------|
| Chronic heart failure                                       | 3283871000006117 | 48447003         | 80720010         |
| Pulmonary edema - acute                                     | 3152731000006113 | 40541001         | 1490485013       |
| New York Heart Association Classification - Class IV        | 2616473014       | 422293003        | 2616473014       |
| Pulmonary oedema NOS                                        | 301694014        | 19242006         | 479262018        |
| [D]Cardiorespiratory failure                                | 317955011        | 410431009        | 2472092014       |
| Chronic left ventricular systolic dysfunction               | 7119761000006112 | 430396006        | 2770949016       |
| Impaired left ventricular func                              | 5573991000006118 | 275514001        | 1495323018       |
| Biventricular failure                                       | 4005301000006110 | 92506005         | 510016018        |
| Hypertensive heart&renal dis wth (congestive) heart failure | 741701000006114  | 194779001        | 299672017        |
| Heart failure due to end stage congenital heart disease     | 7475721000006114 | 471880001        | 2950981012       |
| Acute edema of lung                                         | 3152701000006117 | 40541001         | 67601010         |
| Cardiac cirrhosis                                           | 3713561000006119 | 74669004         | 123997016        |
| Left-sided heart failure                                    | 3886061000006119 | 85232009         | 201199018        |
| On examination - pulmonary edema                            | 4555471000006115 | 162970000        | 2667198010       |
| Heart failure confirmed                                     | 1488804017       | 395105005        | 1488804017       |
| Hyperten heart&renal dis+both(congestv)heart and renal fail | 789941000006117  | 194781004        | 299674016        |
| Acute pulmonary edema                                       | 3152691000006117 | 40541001         | 67598017         |
| Systolic heart failure                                      | 6914191000006115 | 417996009        | 2577903013       |
| Decompensated cardiac failure                               | 300179017        | 195111005        | 300179017        |
| Compensated cardiac failure                                 | 300180019        | 195112003        | 300180019        |
| HFNEF - heart failure with normal ejection fraction         | 1661371000000112 | 446221000        | 1713091000000115 |
| Acute oedema of lung, unspecified                           | 1216090015       | 40541001         | 67598017         |
| Severe left ventricular systolic dysfunction                | 1991651000006115 | 1991651000006104 | 1991651000006115 |
| LVF - Left ventricular failure                              | 3886071000006114 | 85232009         | 1235017018       |
| Left heart failure                                          | 3886041000006118 | 85232009         | 141303019        |
| Right heart failure due to pulmonary hypertension           | 7052811000006113 | 426012001        | 2674125010       |
| Cardiac failure NOS                                         | 223981000000118  | 84114007         | 139482012        |
| Diastolic heart failure                                     | 6919191000006119 | 418304008        | 2577902015       |
| [RFC] Cardiac failure                                       | 905391000006119  | 905391000006103  | 905391000006119  |
| Acute oedema of lung                                        | 3152711000006119 | 40541001         | 492667013        |
| Congestive cardiac failure                                  | 493287011        | 42343007         | 70653017         |
| Acute heart failure                                         | 94251011         | 56675007         | 94251011         |
| Pulmonary congestion                                        | 112265015        | 67599009         | 112265015        |
| Post cardiac operation heart failure NOS                    | 300217019        | 195130005        | 300214014        |
| CHF - Congestive heart failure                              | 3182561000006118 | 42343007         | 493289014        |
| Chronic pulmonary edema                                     | 3257341000006116 | 46847001         | 78084015         |
| Heart failure                                               | 139475013        | 84114007         | 139475013        |
| Right ventricular failure                                   | 490972013        | 367363000        | 490972013        |
| Fluid overload pulmonary oedema                             | 5054791000006119 | 233712009        | 350205014        |
| Fluid overload pulmonary oedema                             | 5054791000006119 | 233712009        | 350205014        |
| Heart failure with normal ejection fraction                 | 1647701000000118 | 446221000        | 2883808011       |

|                                                             |                  |                |            |
|-------------------------------------------------------------|------------------|----------------|------------|
| Postoperative pulmonary edema                               | 2682661000006114 | 11468004       | 19840013   |
| New York Heart Association Classification - Class III       | 2616472016       | 420913000      | 2616472016 |
| Acute pulmonary oedema NOS                                  | 301743011        | 40541001       | 492666016  |
| Echocardiogram shows left ventricular systolic dysfunction  | 2159197017       | 407596008      | 2159197017 |
| Echocardiogram shows left ventricular diastolic dysfunction | 2159198010       | 407597004      | 2159198010 |
| Pulmonary oedema - acute                                    | 3152721000006110 | 40541001       | 1490256017 |
| Pulmonary oedema - acute                                    | 1490256017       | 40541001       | 492666016  |
| Suspected heart failure                                     | 1488591011       | 394887005      | 1488591011 |
| Malignant hypertensive heart disease with CCF               | 728671000006119  | 83105008       | 1236017010 |
| Exacerbation of congestive heart failure                    | 8030311000006111 | 96311000119109 | 2921293019 |
| H/O: Heart failure in last year                             | 453099015        | 309634009      | 453099015  |
| Acute right-sided heart failure                             | 6204381000006117 | 359617009      | 474047012  |
| Acute right-sided heart failure                             | 6204381000006117 | 359617009      | 474047012  |
| Biventricular failure                                       | 510016018        | 92506005       | 153058012  |
| Heart failure with reduced ejection fraction                | 7573171000006116 | 703272007      | 3008211011 |
| Impaired left ventricular function                          | 784191000006110  | 275514001      | 411506018  |
| Decompensated chronic heart failure                         | 7025691000006110 | 424404003      | 2645367010 |
| Left ventricular systolic dysfunction                       | 216207010        | 134401001      | 216207010  |
| Pulmonary congestion and hypostasis                         | 301689014        | 196115007      | 301689014  |
| Congestive heart failure with right heart failure           | 8011111000006111 | 23341000119109 | 2984250012 |



**Table S44. Heart failure HES (ICD10) codes**

| ICD10 codes | Term                                                                                        |
|-------------|---------------------------------------------------------------------------------------------|
| I50.0       | Congestive heart failure                                                                    |
| I50.1       | Left ventricular heart failure                                                              |
| I50.9       | Heart failure, unspecified                                                                  |
| I11.0       | Hypertensive heart disease with (congestive) heart failure                                  |
| I13.0       | Hypertensive heart and renal disease with (congestive) heart failure                        |
| I13.2       | Hypertensive heart and renal disease with both (congestive) heart failure and renal failure |
| I42.0       | Dilated cardiomyopathy                                                                      |
| K76.1       | Chronic passive congestion of liver                                                         |
| J81         | Pulmonary oedema                                                                            |
| R57.0       | Cardiogenic shock                                                                           |

## Chapter 3. Code lists for baseline characteristics

**Table S45. Ethnicity Aurum codes**

| Term                                                                                                    | Medcode ID       | SNOMED CT<br>Concept ID | SNOMED CT<br>Description ID |
|---------------------------------------------------------------------------------------------------------|------------------|-------------------------|-----------------------------|
| Black Arab                                                                                              | 411574019        | 275587000               | 411574019                   |
| Black Iranian                                                                                           | 411575018        | 275588005               | 411575018                   |
| Black East African Asian                                                                                | 411576017        | 275589002               | 411576017                   |
| Caribbean Island (NMO)                                                                                  | 411578016        | 275591005               | 411578016                   |
| Iranian (NMO)                                                                                           | 411582019        | 275595001               | 411582019                   |
| Turkish Cypriot (NMO)                                                                                   | 411597016        | 275602002               | 411597016                   |
| O/E - Asian origin                                                                                      | 412016016        | 276029002               | 412016016                   |
| Australian origin                                                                                       | 250227018        | 160518001               | 250227018                   |
| Middle Eastern origin                                                                                   | 250229015        | 160520003               | 250229015                   |
| Far Eastern origin                                                                                      | 250230013        | 160521004               | 250230013                   |
| West Indian origin                                                                                      | 250231012        | 160522006               | 250231012                   |
| O/E - Europeanoid                                                                                       | 253629014        | 162731001               | 253629014                   |
| Other ethnic NEC (NMO)                                                                                  | 285988010        | 186005001               | 285958018                   |
| New Zealand ethnic group NOS                                                                            | 286022019        | 186035008               | 286006015                   |
| Afghan                                                                                                  | 1564151000006117 | 1564151000006101        | 1564151000006117            |
| Australian                                                                                              | 1564241000006111 | 1564241000006107        | 1564241000006111            |
| Bangladeshi                                                                                             | 1564291000006119 | 1564291000006103        | 1564291000006119            |
| Burmese                                                                                                 | 1564431000006119 | 1564431000006103        | 1564431000006119            |
| Chilean                                                                                                 | 1564511000006114 | 1564511000006105        | 1564511000006114            |
| Cuban                                                                                                   | 1564581000006119 | 1564581000006103        | 1564581000006119            |
| Filipino                                                                                                | 1564731000006113 | 1564731000006109        | 1564731000006113            |
| Greek                                                                                                   | 1564811000006111 | 1564811000006107        | 1564811000006111            |
| Israeli                                                                                                 | 1564971000006113 | 1564971000006109        | 1564971000006113            |
| Italian                                                                                                 | 1564981000006111 | 1564981000006107        | 1564981000006111            |
| Korean (North)                                                                                          | 1565071000006113 | 1565071000006109        | 1565071000006113            |
| Malaysian                                                                                               | 1565211000006111 | 1565211000006107        | 1565211000006111            |
| Moroccan                                                                                                | 1565321000006110 | 1565321000006106        | 1565321000006110            |
| New Zealander                                                                                           | 1565391000006112 | 1565391000006108        | 1565391000006112            |
| Saudi Arabian                                                                                           | 1565611000006114 | 1565611000006105        | 1565611000006114            |
| Somali                                                                                                  | 1565701000006116 | 1565701000006100        | 1565701000006116            |
| Thai                                                                                                    | 1565821000006119 | 1565821000006103        | 1565821000006119            |
| Venezuelan                                                                                              | 1565941000006116 | 1565941000006100        | 1565941000006116            |
| Vietnamese                                                                                              | 1565951000006119 | 1565951000006103        | 1565951000006119            |
| On examination - Asian origin                                                                           | 5580031000006118 | 276029002               | 2669882010                  |
| Ethnic group not recorded                                                                               | 456652017        | 312861003               | 456652017                   |
| Other ethnic, mixed white origin                                                                        | 4740381000006118 | 186022004               | 2668812012                  |
| Mixed multiple ethnic groups: White and Black Caribbean - England and Wales ethnic category 2011 census | 1968091000006110 | 976711000000103         | 2484791000000114            |

|                                                                                                                                                |                  |                 |                  |
|------------------------------------------------------------------------------------------------------------------------------------------------|------------------|-----------------|------------------|
| Asian or Asian British: Bangladeshi - England and Wales ethnic category 2011 census                                                            | 1968151000006117 | 976831000000100 | 2485031000000111 |
| Black or African or Caribbean or Black British: other Black or African or Caribbean background - England and Wales ethnic category 2011 census | 1968201000006114 | 976931000000109 | 2485231000000119 |
| Asian or Asian British: Pakistani - Northern Ireland ethnic category 2011 census                                                               | 1968311000006115 | 977711000000100 | 2486881000000113 |
| Asian or Asian British: Chinese - Northern Ireland ethnic category 2011 census                                                                 | 1968331000006114 | 977751000000101 | 2486961000000110 |
| Asian or Asian Scottish or Asian British: Chinese - Scotland ethnic category 2011 census                                                       | 1968511000006114 | 978191000000109 | 2487851000000117 |
| Caribbean or Black: any other Black or Caribbean group - Scotland ethnic category 2011 census                                                  | 1968571000006117 | 978361000000101 | 2488221000000112 |
| British ethnic minority unspecified (NMO)                                                                                                      | 4740261000006118 | 186007009       | 2668698012       |
| On examination - Mongoloid origin                                                                                                              | 5507871000006110 | 268914005       | 2669720011       |
| Black Caribbean                                                                                                                                | 514611000006111  | 185988007       | 285930014        |
| Chinese                                                                                                                                        | 550541000006110  | 33897005        | 56590016         |
| White British                                                                                                                                  | 459726019        | 315236000       | 459726019        |
| White Irish                                                                                                                                    | 459727011        | 315237009       | 459727011        |
| Other Asian ethnic group                                                                                                                       | 459784018        | 315281001       | 459784018        |
| Irish traveller                                                                                                                                | 459786016        | 315283003       | 459786016        |
| White: Irish - England and Wales ethnic category 2011 census                                                                                   | 2484671000000118 | 976651000000108 | 2484671000000118 |
| White: Scottish - Scotland ethnic category 2011 census                                                                                         | 2487281000000112 | 977911000000103 | 2487281000000112 |
| White: Polish - Scotland ethnic category 2011 census                                                                                           | 2487481000000113 | 978011000000101 | 2487481000000113 |
| Sri Lankan - ethnic category 2001 census                                                                                                       | 136081000000111  | 86461000000107  | 136081000000111  |
| Albanian - ethnic category 2001 census                                                                                                         | 138231000000116  | 88971000000106  | 138231000000116  |
| Jewish - ethnic category 2001 census                                                                                                           | 138241000000113  | 88991000000105  | 138241000000113  |
| White and Black African - ethnic category 2001 census                                                                                          | 141331000000116  | 92431000000100  | 141331000000116  |
| Other Asian background - ethnic category 2001 census                                                                                           | 141381000000117  | 92481000000101  | 141381000000117  |
| Welsh - ethnic category 2001 census                                                                                                            | 141441000000119  | 92551000000106  | 141441000000119  |
| Northern Irish - ethnic category 2001 census                                                                                                   | 141451000000116  | 92561000000109  | 141451000000116  |
| Chinese and White - ethnic category 2001 census                                                                                                | 141491000000112  | 92601000000109  | 141491000000112  |
| Kashmiri - ethnic category 2001 census                                                                                                         | 141531000000112  | 92651000000105  | 141531000000112  |
| East African Asian - ethnic category 2001 census                                                                                               | 141541000000115  | 92661000000108  | 141541000000115  |
| British Asian - ethnic category 2001 census                                                                                                    | 141561000000119  | 92681000000104  | 141561000000119  |
| Caribbean Asian - ethnic category 2001 census                                                                                                  | 141571000000114  | 92691000000102  | 141571000000114  |
| Nigerian - ethnic category 2001 census                                                                                                         | 141601000000119  | 92731000000108  | 141601000000119  |
| Filipino - ethnic category 2001 census                                                                                                         | 141641000000116  | 92771000000105  | 141641000000116  |
| Cypriot (part not stated) - ethnic category 2001 census                                                                                        | 141661000000115  | 92791000000109  | 141661000000115  |
| Greek - ethnic category 2001 census                                                                                                            | 142701000000116  | 93931000000104  | 142701000000116  |
| Kosovan - ethnic category 2001 census                                                                                                          | 142741000000118  | 93981000000100  | 142741000000118  |
| Croatian - ethnic category 2001 census                                                                                                         | 142761000000117  | 94001000000108  | 142761000000117  |
| Mixed Irish and other White - ethnic category 2001 census                                                                                      | 142781000000114  | 94021000000104  | 142781000000114  |
| North African - ethnic category 2001 census                                                                                                    | 142811000000112  | 94061000000107  | 142811000000112  |

|                                                                                                        |                  |                 |                 |
|--------------------------------------------------------------------------------------------------------|------------------|-----------------|-----------------|
| Buddhist - ethnic category 2001 census                                                                 | 142881000000117  | 94131000000103  | 142881000000117 |
| Caribbean - ethnic category 2001 census                                                                | 154401000000118  | 107691000000105 | 154401000000118 |
| English - ethnic category 2001 census                                                                  | 157281000000117  | 110761000000106 | 157281000000117 |
| Sinhalese - ethnic category 2001 census                                                                | 157301000000116  | 110781000000102 | 157301000000116 |
| Serbian - ethnic category 2001 census                                                                  | 157991000000110  | 88981000000108  | 157991000000110 |
| Asian and Chinese - ethnic category 2001 census                                                        | 158361000000116  | 92611000000106  | 158361000000116 |
| Mixed Black - ethnic category 2001 census                                                              | 158371000000111  | 92721000000106  | 158371000000111 |
| Italian - ethnic category 2001 census                                                                  | 158481000000115  | 93961000000109  | 158481000000115 |
| British ethnic minority specified (NMO)                                                                | 4740241000006117 | 186006000       | 2668697019      |
| Tongan                                                                                                 | 504723011        | 81560001        | 504723011       |
| White Scottish                                                                                         | 1780407014       | 401213008       | 1780407014      |
| Other white British ethnic group                                                                       | 1780408016       | 401214002       | 1780408016      |
| Caucasian                                                                                              | 6846371000006111 | 413773004       | 2533842018      |
| Romanian                                                                                               | 1158211000000111 | 445343003       | 2872780011      |
| Black Caribbean                                                                                        | 285930014        | 185988007       | 285930014       |
| Black, other, non-mixed origin                                                                         | 285931013        | 185989004       | 285931013       |
| Black Indian sub-continent                                                                             | 285948017        | 185995003       | 285948017       |
| Black - other Asian                                                                                    | 285949013        | 185996002       | 285949013       |
| Other Black - Black/White orig                                                                         | 285952017        | 185999009       | 285952017       |
| Other African countries (NMO)                                                                          | 285971015        | 186010002       | 285971015       |
| Indian sub-continent (NMO)                                                                             | 285976013        | 186012005       | 285976013       |
| Other European (NMO)                                                                                   | 285987017        | 186017004       | 285987017       |
| Other ethnic, Black/White orig                                                                         | 285990011        | 186020007       | 285990011       |
| Other ethnic, Asian/White orig                                                                         | 285991010        | 186021006       | 285991010       |
| Other ethnic, other mixed orig                                                                         | 285993013        | 186023009       | 285993013       |
| New Zealand ethnic groups                                                                              | 286006015        | 186035008       | 286006015       |
| Other European in New Zealand                                                                          | 286009010        | 186037000       | 286009010       |
| New Zealand Maori                                                                                      | 286012013        | 186039002       | 286012013       |
| Tokelauan                                                                                              | 286015010        | 186042008       | 286015010       |
| Turkish/Turkish Cypriot (NMO)                                                                          | 405071018        | 270467002       | 405071018       |
| Race: White                                                                                            | 2537217015       | 413773004       | 2537217015      |
| Black Caribbean/West India/Guyana                                                                      | 5516681000006114 | 270460000       | 2983029017      |
| Commonwealth of (Russian) Independent States - ethnic category 2001 census                             | 9373110000006113 | 88961000000104  | 138221000000118 |
| Other republics which made up the former Yugoslavia - ethnic category 2001 census                      | 9373710000006116 | 94011000000105  | 142771000000112 |
| Middle Eastern (excluding Israeli, Iranian and Arab) - ethnic category 2001 census                     | 9378710000006114 | 94071000000100  | 142821000000118 |
| Multi-ethnic islands: Mauritian or Seychellois or Maldivian or St Helena - ethnic category 2001 census | 9379410000006111 | 94121000000100  | 142871000000119 |
| Black N African/Arab/Iranian                                                                           | 405065012        | 270461001       | 405065012       |
| Indo-Caribbean (NMO)                                                                                   | 411584018        | 275597009       | 411584018       |
| Greek (NMO)                                                                                            | 411594011        | 275599007       | 411594011       |
| Black West Indian                                                                                      | 453109012        | 309643000       | 453109012       |

|                                                                                                                                               |                  |                  |                  |
|-----------------------------------------------------------------------------------------------------------------------------------------------|------------------|------------------|------------------|
| Other black ethnic group                                                                                                                      | 459782019        | 315279003        | 459782019        |
| Black African and White                                                                                                                       | 460154012        | 315635008        | 460154012        |
| White: English or Welsh or Scottish or Northern Irish or British - England and Wales ethnic category 2011 census                              | 1968051000006116 | 976631000000101  | 2484631000000115 |
| Mixed multiple ethnic groups: any other Mixed or multiple ethnic background - England and Wales ethnic category 2011 census                   | 1968121000006114 | 976771000000108  | 2484911000000115 |
| Asian or Asian British: Indian - England and Wales ethnic category 2011 census                                                                | 1968131000006112 | 976791000000107  | 2484951000000116 |
| Asian or Asian British: Pakistani - England and Wales ethnic category 2011 census                                                             | 1968141000006119 | 976811000000108  | 2484991000000112 |
| Black or African or Caribbean or Black British: African - England and Wales ethnic category 2011 census                                       | 1968181000006113 | 976891000000104  | 2485151000000115 |
| Black or African or Caribbean or Black British: Caribbean - England and Wales ethnic category 2011 census                                     | 1968191000006111 | 976911000000101  | 2485191000000111 |
| Other ethnic group: Arab - England and Wales ethnic category 2011 census                                                                      | 1968211000006112 | 976951000000102  | 2485271000000117 |
| Asian or Asian British: Indian - Northern Ireland ethnic category 2011 census                                                                 | 1968301000006118 | 977591000000103  | 2486641000000116 |
| Asian or Asian British: Bangladeshi - Northern Ireland ethnic category 2011 census                                                            | 1968321000006111 | 977731000000108  | 2486921000000119 |
| Asian or Asian British: any other Asian background - Northern Ireland ethnic category 2011 census                                             | 1968341000006116 | 977771000000105  | 2487001000000110 |
| Black or African or Caribbean or Black British: African - Northern Ireland ethnic category 2011 census                                        | 1968351000006119 | 977791000000109  | 2487041000000113 |
| Black or African or Caribbean or Black British: other Black or African or Caribbean background - Northern Ireland ethnic category 2011 census | 1968371000006112 | 977831000000102  | 2487121000000119 |
| Other ethnic group: any other ethnic group - Northern Ireland ethnic category 2011 census                                                     | 1968391000006113 | 977871000000100  | 2487201000000119 |
| Asian or Asian Scottish or Asian British: Pakistani, Pakistani Scottish or Pakistani British - Scotland ethnic category 2011 census           | 1968481000006118 | 978071000000106  | 2487601000000117 |
| Asian or Asian Scottish or Asian British: any other Asian group - Scotland ethnic category 2011 census                                        | 1968521000006118 | 978211000000108  | 2487891000000113 |
| African: any other African - Scotland ethnic category 2011 census                                                                             | 1968541000006113 | 978251000000107  | 2487971000000118 |
| Other ethnic group: Arab, Arab Scottish or Arab British - Scotland ethnic category 2011 census                                                | 1968581000006119 | 978381000000105  | 2488261000000116 |
| Other ethnic group: any other ethnic group - Scotland ethnic category 2011 census                                                             | 1968591000006116 | 978401000000105  | 2488301000000114 |
| Black - ethnic group                                                                                                                          | 459730016        | 315240009        | 459730016        |
| Mixed ethnic census group                                                                                                                     | 459729014        | 315239007        | 459729014        |
| Asian - ethnic group                                                                                                                          | 286020010        | 315280000        | 459783012        |
| Race                                                                                                                                          | 371005013        | 103579009        | 265558016        |
| White - ethnic group                                                                                                                          | 459728018        | 185984009        | 285926011        |
| Chinese                                                                                                                                       | 1564521000006118 | 1564521000006102 | 1564521000006118 |
| Colombian                                                                                                                                     | 1564531000006115 | 1564531000006104 | 1564531000006115 |
| Cypriot                                                                                                                                       | 1564591000006116 | 1564591000006100 | 1564591000006116 |
| Peruvian                                                                                                                                      | 1565491000006119 | 1565491000006103 | 1565491000006119 |
| Taiwanese                                                                                                                                     | 1565791000006111 | 1565791000006107 | 1565791000006111 |
| Brazilian                                                                                                                                     | 1573191000006117 | 1573191000006101 | 1573191000006117 |

|                                                         |                  |                 |                  |
|---------------------------------------------------------|------------------|-----------------|------------------|
| Indian                                                  | 781081000006113  | 414481008       | 2533844017       |
| Yemeni                                                  | 523591000000116  | 296841000000102 | 523591000000116  |
| Roma ethnic group                                       | 2645811000000115 | 718958002       | 2678971000000113 |
| White Irish - ethnic category 2001 census               | 1064041000000111 | 494161000000100 | 1064041000000111 |
| Polish - ethnic category 2001 census                    | 138201000000110  | 88941000000100  | 138201000000110  |
| Irish - ethnic category 2001 census                     | 141301000000110  | 92401000000106  | 141301000000110  |
| White and Black Caribbean - ethnic category 2001 census | 141321000000118  | 92421000000102  | 141321000000118  |
| Scottish - ethnic category 2001 census                  | 141431000000111  | 92541000000108  | 141431000000111  |
| Tamil - ethnic category 2001 census                     | 141551000000117  | 92671000000101  | 141551000000117  |
| Somali - ethnic category 2001 census                    | 141591000000113  | 92711000000100  | 141591000000113  |
| Ulster Scots - ethnic category 2001 census              | 142691000000116  | 93921000000101  | 142691000000116  |
| Kurdish - ethnic category 2001 census                   | 142841000000113  | 94091000000101  | 142841000000113  |
| Sikh - ethnic category 2001 census                      | 142891000000115  | 94141000000107  | 142891000000115  |
| British or mixed British - ethnic category 2001 census  | 158341000000117  | 92391000000108  | 158341000000117  |
| Ethnic group                                            | 459785017        | 372148003       | 1210724015       |
| Black British                                           | 285932018        | 185990008       | 285932018        |
| Indian                                                  | 285954016        | 414481008       | 2533844017       |
| Pakistani                                               | 285955015        | 186002003       | 285955015        |
| Brit. ethnic minor. spec.(NMO)                          | 285959014        | 186006000       | 285959014        |
| Other Asian (NMO)                                       | 285977016        | 186013000       | 285977016        |
| Other ethnic, mixed white orig                          | 285992015        | 186022004       | 285992015        |
| Pakeha                                                  | 286008019        | 186036009       | 286008019        |
| South East Asian                                        | 286018012        | 186044009       | 286018012        |
| Arabs                                                   | 196621000006115  | 90027003        | 149237014        |
| Caucasian race                                          | 196641000006110  | 413773004       | 2537215011       |
| Mixed racial group                                      | 196681000006116  | 414752008       | 2533847012       |
| Oriental                                                | 196701000006118  | 414978006       | 2533849010       |
| Unknown racial group                                    | 196731000006114  | 415794004       | 2533839012       |
| Black East African Asian/Indo-Caribbean                 | 514651000006112  | 270462008       | 405066013        |
| Caribbean I./W.I./Guyana (NMO)                          | 405067016        | 270463003       | 405067016        |
| Black African                                           | 30683015         | 18167009        | 30683015         |
| RACE: Bangladeshi                                       | 196631000006117  | 186003008       | 285956019        |
| White British - ethnic category 2001 census             | 1063981000000117 | 494131000000105 | 1063981000000117 |
| Black - other African country                           | 285943014        | 185993005       | 285943014        |
| Other ethnic, mixed origin                              | 285989019        | 186019001       | 285989019        |
| Cook Island Maori                                       | 286013015        | 186040000       | 286013015        |
| Niuean                                                  | 286014014        | 186041001       | 286014014        |
| Afro-Caribbean                                          | 196601000006113  | 413465009       | 2533840014       |
| Koreans                                                 | 196671000006119  | 38361009        | 63432018         |
| Other New Zealand ethnic group                          | 286021014        | 186035008       | 286006015        |
| Patient ethnicity unknown                               | 308131000000114  | 202171000000101 | 308131000000114  |

|                                                                                                                            |                  |                  |                  |
|----------------------------------------------------------------------------------------------------------------------------|------------------|------------------|------------------|
| Gypsy                                                                                                                      | 3146431000006116 | 40182006         | 2162400016       |
| Bangladeshi or British Bangladeshi - ethnic category 2001 census                                                           | 937541000006115  | 92471000000103   | 141371000000119  |
| Mixed multiple ethnic groups: White and Black African - Northern Ireland ethnic category 2011 census                       | 1968271000006115 | 977411000000108  | 2486281000000114 |
| Mixed multiple ethnic groups: any other Mixed or multiple ethnic background - Northern Ireland ethnic category 2011 census | 1968291000006119 | 977551000000106  | 2486561000000119 |
| White: any other White ethnic group - Scotland ethnic category 2011 census                                                 | 1968461000006111 | 978031000000109  | 2487521000000113 |
| South American origin                                                                                                      | 250226010        | 160517006        | 250226010        |
| Japanese - ethnic category 2001 census                                                                                     | 141631000000113  | 92761000000103   | 141631000000113  |
| Bosnian - ethnic category 2001 census                                                                                      | 142751000000115  | 93991000000103   | 142751000000115  |
| O/E - Mongoloid origin                                                                                                     | 402434017        | 268914005        | 402434017        |
| N African Arab/Iranian (NMO)                                                                                               | 405068014        | 270464009        | 405068014        |
| Guyana (NMO)                                                                                                               | 411580010        | 275593008        | 411580010        |
| Greek Cypriot (NMO)                                                                                                        | 411595012        | 275600005        | 411595012        |
| Black Guyana                                                                                                               | 453110019        | 309644006        | 453110019        |
| Black Indo-Caribbean                                                                                                       | 411577014        | 275590006        | 411577014        |
| West Indian (NMO)                                                                                                          | 411579012        | 275592003        | 411579012        |
| Black Caribbean and White                                                                                                  | 460153018        | 315634007        | 460153018        |
| Black                                                                                                                      | 459731017        | 315240009        | 459731017        |
| White                                                                                                                      | 285925010        | 185984009        | 285925010        |
| Bangladeshi                                                                                                                | 285956019        | 186003008        | 285956019        |
| Irish (NMO)                                                                                                                | 285978014        | 186014006        | 285978014        |
| Portuguese                                                                                                                 | 133078012        | 80208004         | 133078012        |
| Pakistani                                                                                                                  | 1565441000006111 | 1565441000006107 | 1565441000006111 |
| Black Black - other                                                                                                        | 285950013        | 185989004        | 285931013        |
| European origin                                                                                                            | 250222012        | 160513005        | 250222012        |
| Asian origin                                                                                                               | 250224013        | 160515003        | 250224013        |
| White - Northern Ireland ethnic category 2011 census                                                                       | 2486161000000112 | 977351000000100  | 2486161000000112 |
| White: other British - Scotland ethnic category 2011 census                                                                | 2487321000000116 | 977931000000106  | 2487321000000116 |
| White: Irish - Scotland ethnic category 2011 census                                                                        | 2487361000000112 | 977951000000104  | 2487361000000112 |
| Other Pacific ethnic group                                                                                                 | 286017019        | 372148003        | 1210724015       |
| Nepalese                                                                                                                   | 1745831000006112 | 1745831000006108 | 1745831000006112 |
| Caucasoid race                                                                                                             | 6846391000006112 | 413773004        | 2537216012       |
| Japanese                                                                                                                   | 196661000006114  | 414551003        | 2533843011       |
| Race not stated                                                                                                            | 196691000006118  | 415226007        | 2533846015       |
| Other ethnic, Black/White origin                                                                                           | 4740341000006112 | 186020007        | 2763938013       |
| Gypsy/Romany - ethnic category 2001 census                                                                                 | 138191000000113  | 88931000000109   | 138191000000113  |
| Pakistani or British Pakistani - ethnic category 2001 census                                                               | 141361000000114  | 92461000000105   | 141361000000114  |
| Black and Asian - ethnic category 2001 census                                                                              | 141471000000113  | 92581000000100   | 141471000000113  |
| Black and Chinese - ethnic category 2001 census                                                                            | 141481000000110  | 92591000000103   | 141481000000110  |

|                                                                                                                            |                  |                 |                  |
|----------------------------------------------------------------------------------------------------------------------------|------------------|-----------------|------------------|
| Mixed Asian - ethnic category 2001 census                                                                                  | 141511000000116  | 92631000000103  | 141511000000116  |
| Vietnamese - ethnic category 2001 census                                                                                   | 141621000000111  | 92751000000101  | 141621000000111  |
| Turkish Cypriot - ethnic category 2001 census                                                                              | 142721000000113  | 93951000000106  | 142721000000113  |
| Turkish - ethnic category 2001 census                                                                                      | 156921000000110  | 110401000000103 | 156921000000110  |
| Hindu - ethnic category 2001 census                                                                                        | 157351000000115  | 110831000000107 | 157351000000115  |
| Slovak                                                                                                                     | 1551471000000116 | 36329002        | 3314524013       |
| Other White European or European unspecified or Mixed European - ethnic category 2001 census                               | 937391000006115  | 94041000000106  | 142801000000110  |
| Other Black or Black unspecified - ethnic category 2001 census                                                             | 937731000006115  | 92741000000104  | 141611000000117  |
| Fijian                                                                                                                     | 501416013        | 69865008        | 501416013        |
| Afro-Caucasian                                                                                                             | 196611000006111  | 413466005       | 2533841013       |
| Gypsies                                                                                                                    | 850671000006119  | 40182006        | 63802019         |
| Baltic States (Estonian or Latvian or Lithuanian) - ethnic category 2001 census                                            | 937301000006110  | 88951000000102  | 138211000000112  |
| Other Mixed or Mixed unspecified - ethnic category 2001 census                                                             | 937511000006119  | 92621000000100  | 141501000000118  |
| Other Asian or Asian unspecified - ethnic category 2001 census                                                             | 937651000006117  | 92701000000102  | 141581000000111  |
| Asian or Asian British: Chinese - England and Wales ethnic category 2011 census                                            | 1968161000006115 | 976851000000107 | 2485071000000113 |
| Mixed multiple ethnic groups: White and Black Caribbean - Northern Ireland ethnic category 2011 census                     | 1968261000006110 | 977391000000108 | 2486241000000118 |
| Mixed multiple ethnic groups: White and Asian - Northern Ireland ethnic category 2011 census                               | 1968281000006117 | 977431000000100 | 2486321000000118 |
| Asian or Asian Scottish or Asian British: Indian, Indian Scottish or Indian British - Scotland ethnic category 2011 census | 1968491000006115 | 978111000000100 | 2487681000000110 |
| Other ethnic non-mixed (NMO)                                                                                               | 285958018        | 186005001       | 285958018        |
| Brit. ethnic minor. unsp (NMO)                                                                                             | 285960016        | 186007009       | 285960016        |
| New Zealand European                                                                                                       | 286007012        | 186036009       | 286007012        |
| Czech                                                                                                                      | 1160331000000119 | 286009          | 3314518019       |
| Bulgarian                                                                                                                  | 1158301000000115 | 29343004        | 1158301000000115 |
| Irish Traveller - ethnic category 2001 census                                                                              | 138171000000114  | 88911000000101  | 138171000000114  |
| Traveller - ethnic category 2001 census                                                                                    | 138181000000111  | 88921000000107  | 138181000000111  |
| South and Central American - ethnic category 2001 census                                                                   | 138271000000119  | 89021000000101  | 138271000000119  |
| Muslim - ethnic category 2001 census                                                                                       | 138281000000117  | 89031000000104  | 138281000000117  |
| Other White background - ethnic category 2001 census                                                                       | 141311000000112  | 92411000000108  | 141311000000112  |
| Other Mixed background - ethnic category 2001 census                                                                       | 141351000000111  | 92451000000107  | 141351000000111  |
| African - ethnic category 2001 census                                                                                      | 141391000000115  | 92491000000104  | 141391000000115  |
| Chinese - ethnic category 2001 census                                                                                      | 141401000000117  | 92511000000107  | 141401000000117  |
| Other - ethnic category 2001 census                                                                                        | 141411000000115  | 92521000000101  | 141411000000115  |
| Cornish - ethnic category 2001 census                                                                                      | 141461000000118  | 92571000000102  | 141461000000118  |
| Punjabi - ethnic category 2001 census                                                                                      | 141521000000110  | 92641000000107  | 141521000000110  |
| Malaysian - ethnic category 2001 census                                                                                    | 141651000000118  | 92781000000107  | 141651000000118  |
| Greek Cypriot - ethnic category 2001 census                                                                                | 142711000000119  | 93941000000108  | 142711000000119  |
| Latin American - ethnic category 2001 census                                                                               | 142861000000114  | 94111000000106  | 142861000000114  |



|                                                                                                                                           |                  |                  |                  |
|-------------------------------------------------------------------------------------------------------------------------------------------|------------------|------------------|------------------|
| Black and White - ethnic category 2001 census                                                                                             | 157291000000115  | 110771000000104  | 157291000000115  |
| Other Black background - ethnic category 2001 census                                                                                      | 158351000000119  | 92501000000105   | 158351000000119  |
| White: any other White background - England and Wales ethnic category 2011 census                                                         | 1968081000006112 | 976691000000100  | 2484751000000118 |
| Mixed multiple ethnic groups: White and Black African - England and Wales ethnic category 2011 census                                     | 1968101000006116 | 976731000000106  | 2484831000000119 |
| Asian or Asian British: any other Asian background - England and Wales ethnic category 2011 census                                        | 1968171000006110 | 976871000000103  | 2485111000000119 |
| Other ethnic group: Arab - Northern Ireland ethnic category 2011 census                                                                   | 1968381000006110 | 977851000000109  | 2487161000000110 |
| Mixed or multiple ethnic groups: any Mixed or multiple ethnic group - Scotland ethnic category 2011 census                                | 1968471000006116 | 978051000000102  | 2487561000000117 |
| Albanian                                                                                                                                  | 1564161000006115 | 1564161000006104 | 1564161000006115 |
| Brazilian                                                                                                                                 | 1564381000006110 | 1564381000006106 | 1564381000006110 |
| Indian                                                                                                                                    | 1564921000006112 | 1564921000006108 | 1564921000006112 |
| Iranian                                                                                                                                   | 1564941000006117 | 1564941000006101 | 1564941000006117 |
| Mexican                                                                                                                                   | 1565281000006116 | 1565281000006100 | 1565281000006116 |
| E Afric Asian/Indo-Carib (NMO)                                                                                                            | 405069018        | 270465005        | 405069018        |
| Greek/Greek Cypriot (NMO)                                                                                                                 | 405070017        | 270466006        | 405070017        |
| North African Arab (NMO)                                                                                                                  | 411581014        | 275594002        | 411581014        |
| East African Asian (NMO)                                                                                                                  | 411583012        | 275596000        | 411583012        |
| Turkish (NMO)                                                                                                                             | 411596013        | 275601009        | 411596013        |
| American                                                                                                                                  | 1564181000006113 | 1564181000006109 | 1564181000006113 |
| Cambodian                                                                                                                                 | 1564451000006114 | 1564451000006105 | 1564451000006114 |
| Central African                                                                                                                           | 1564491000006115 | 1564491000006104 | 1564491000006115 |
| Japanese                                                                                                                                  | 1565011000006116 | 1565011000006100 | 1565011000006116 |
| Sri Lankan                                                                                                                                | 1565731000006112 | 1565731000006108 | 1565731000006112 |
| Yugoslavian                                                                                                                               | 1565971000006112 | 1565971000006108 | 1565971000006112 |
| Nepali                                                                                                                                    | 1572831000000110 | 718131000000106  | 1572831000000110 |
| Other White or White unspecified - ethnic category 2001 census                                                                            | 937411000006115  | 94051000000109   | 158491000000118  |
| White: Gypsy or Irish Traveller - England and Wales ethnic category 2011 census                                                           | 1968071000006114 | 976671000000104  | 2484711000000117 |
| Mixed multiple ethnic groups: White and Asian - England and Wales ethnic category 2011 census                                             | 1968111000006118 | 976751000000104  | 2484871000000117 |
| Other ethnic group: any other ethnic group - England and Wales ethnic category 2011 census                                                | 1968221000006116 | 976971000000106  | 2485311000000117 |
| Irish Traveller - Northern Ireland ethnic category 2011 census                                                                            | 1968251000006113 | 977371000000109  | 2486201000000116 |
| Black or African or Caribbean or Black British: Caribbean - Northern Ireland ethnic category 2011 census                                  | 1968361000006117 | 977811000000105  | 2487081000000117 |
| White: Gypsy or Irish Traveller - Scotland ethnic category 2011 census                                                                    | 1968441000006112 | 977971000000108  | 2487401000000115 |
| Asian or Asian Scottish or Asian British: Bangladeshi, Bangladeshi Scottish or Bangladeshi British - Scotland ethnic category 2011 census | 1968501000006111 | 978171000000105  | 2487801000000118 |
| African: African, African Scottish or African British - Scotland ethnic category 2011 census                                              | 1968531000006115 | 978231000000100  | 2487931000000115 |

|                                                                                                               |                   |                  |                  |
|---------------------------------------------------------------------------------------------------------------|-------------------|------------------|------------------|
| Caribbean or Black: Caribbean, Caribbean Scottish or Caribbean British - Scotland ethnic category 2011 census | 1968551000006110  | 978271000000103  | 2488011000000113 |
| Caribbean or Black: Black, Black Scottish or Black British - Scotland ethnic category 2011 census             | 1968561000006112  | 978341000000102  | 2488181000000119 |
| Other ethnic, other mixed origin                                                                              | 4740401000006118  | 186023009        | 2668813019       |
| Samoan                                                                                                        | 507015012         | 86275006         | 507015012        |
| Vietnamese                                                                                                    | 456650013         | 312859007        | 456650013        |
| African origin                                                                                                | 250223019         | 160514004        | 250223019        |
| North American origin                                                                                         | 250225014         | 160516002        | 250225014        |
| Indian origin                                                                                                 | 250228011         | 160519009        | 250228011        |
| Race: West indian                                                                                             | 250243013         | 160531006        | 250243013        |
| Refusal by patient to provide information about ethnic group                                                  | 456651012         | 763726001        | 3643639011       |
| Arab - ethnic category 2001 census                                                                            | 138251000000111   | 89001000000105   | 138251000000111  |
| Iranian - ethnic category 2001 census                                                                         | 138261000000114   | 89011000000107   | 138261000000114  |
| White and Asian - ethnic category 2001 census                                                                 | 141341000000113   | 92441000000109   | 141341000000113  |
| Ethnic category not stated - 2001 census                                                                      | 141421000000114   | 92531000000104   | 141421000000114  |
| Other mixed White - ethnic category 2001 census                                                               | 142791000000111   | 94031000000102   | 142791000000111  |
| Israeli - ethnic category 2001 census                                                                         | 142831000000116   | 94081000000103   | 142831000000116  |
| Moroccan - ethnic category 2001 census                                                                        | 142851000000111   | 94101000000109   | 142851000000111  |
| Any other group - ethnic category 2001 census                                                                 | 142901000000119   | 94151000000105   | 142901000000119  |
| Indian or British Indian - ethnic category 2001 census                                                        | 157271000000119   | 110751000000108  | 157271000000119  |
| Black British - ethnic category 2001 census                                                                   | 157311000000119   | 110791000000100  | 157311000000119  |
| RACE: Chinese                                                                                                 | 196651000006112   | 33897005         | 56590016         |
| RACE: Pakistani                                                                                               | 196721000006111   | 186002003        | 285955015        |
| Irish                                                                                                         | 1564961000006118  | 1564961000006102 | 1564961000006118 |
| Korean (South)                                                                                                | 1565081000006111  | 1565081000006107 | 1565081000006111 |
| Micronesian                                                                                                   | 1565291000006118  | 1565291000006102 | 1565291000006118 |
| Nepalese                                                                                                      | 1565371000006111  | 1565371000006107 | 1565371000006111 |
| Black Caribbean/W.I./Guyana                                                                                   | 405064011         | 270460000        | 405064011        |
| Black North African                                                                                           | 411573013         | 275586009        | 411573013        |
| Other ethnic, Asian/White origin                                                                              | 4740361000006111  | 186021006        | 2764123018       |
| Chinese                                                                                                       | 56590016          | 33897005         | 56590016         |
| Patient declined to provide information about ethnic group                                                    | 12009371000006110 | 763726001        | 3644134011       |
| Black - other, mixed                                                                                          | 285951012         | 185998001        | 285951012        |
| Other Black - Black/Asian orig                                                                                | 285953010         | 186000006        | 285953010        |

**Table S46. Smoking Aurum codes**

| Term                                            | Medcode ID       | SNOMED CT<br>Concept ID | SNOMED CT<br>Description ID |
|-------------------------------------------------|------------------|-------------------------|-----------------------------|
| <b>Current smoker</b>                           |                  |                         |                             |
| user of electronic cigarette                    | 1879431000006110 | 1879431000006106        | 1879431000006110            |
| tobacco abuse                                   | 3959141000006110 | 89765005                | 148823015                   |
| tobacco use, continuous                         | 4765711000006110 | 191887008               | 2951660019                  |
| ready to stop smoking                           | 1488577017       | 394872000               | 1488577017                  |
| tobacco dependence                              | 102951000006115  | 89765005                | 2951656017                  |
| grade c moderate smoker (11-20/day)             | 854981000006117  | 854981000006101         | 854981000006117             |
| smoking cessation advice                        | 338608011        | 225323000               | 338608011                   |
| grade d heavy smoker (>20 day)                  | 855001000006114  | 855001000006105         | 855001000006114             |
| referred for copd structured smoking assessment | 1704551000006110 | 375851000000108         | 739301000000115             |
| current smoker                                  | 503483019        | 77176002                | 503483019                   |
| smoking free weeks                              | 1488873010       | 395177003               | 1488873010                  |
| light smoker - 1-9 cigs/day                     | 743331000006116  | 160603005               | 250358015                   |
| smokes drugs in cigarette form                  | 342444018        | 228378005               | 342444018                   |
| smokes drugs through a pipe                     | 342445017        | 228379002               | 342445017                   |
| cigar consumption                               | 344794017        | 230057008               | 344794017                   |
| pipe tobacco consumption                        | 344795016        | 230058003               | 344795016                   |
| [v]tobacco abuse counselling                    | 461114016        | 711028002               | 3047058010                  |
| very heavy smoker - 40+cigs/d                   | 67621000006112   | 160606002               | 250362014                   |
| tobacco consumption                             | 102921000006112  | 266918002               | 397730015                   |
| cigarette consumption                           | 344793011        | 230056004               | 344793011                   |
| tobacco dependence, unspecified                 | 295256013        | 89765005                | 148820017                   |
| referral to smoking cessation advisor           | 1489355012       | 395700008               | 1489355012                  |
| smokers' cough                                  | 78013015         | 46802002                | 78013015                    |
| pipe smoker                                     | 136515019        | 82302008                | 136515019                   |
| tobacco dependence, episodic                    | 295258014        | 191888003               | 295258014                   |
| rolls own cigarettes                            | 250375014        | 160619003               | 250375014                   |
| keeps trying to stop smoking                    | 250368013        | 160612007               | 250368013                   |
| smoking started                                 | 2669652019       | 266929003               | 2669652019                  |
| provision of smoking cessation leaflet          | 2982426011       | 699033005               | 2982426011                  |
| smokes/uses tobacco products                    | 961581000006114  | 961581000006105         | 961581000006114             |
| smoking cessation referral declined             | 1591651000006110 | 1591651000006106        | 1591651000006110            |
| referral to stop-smoking clinic                 | 459722017        | 315232003               | 459722017                   |
| smoking restarted                               | 137791000006118  | 308438006               | 2670126018                  |
| smoker (read codes)                             | 137711000006111  | 137711000006107         | 137711000006111             |
| cigarette smoker                                | 854021000006115  | 854021000006104         | 854021000006115             |
| cigar smoker                                    | 99639019         | 59978006                | 99639019                    |
| not interested in stopping smoking              | 1488578010       | 394873005               | 1488578010                  |
| reason for restarting smoking                   | 1780360012       | 401159003               | 1780360012                  |

|                                                            |                  |                 |                  |
|------------------------------------------------------------|------------------|-----------------|------------------|
| current smoker annual review - enhanced services admin     | 1714541000006110 | 505651000000103 | 1152111000000118 |
| not interested in stopping smoking                         | 903981000006117  | 903981000006101 | 903981000006117  |
| previous smoking quit attempts                             | 904021000006118  | 904021000006102 | 904021000006118  |
| thinking about stopping smoking                            | 904031000006115  | 904031000006104 | 904031000006115  |
| carbon monoxide validation of smoking status               | 904051000006110  | 904051000006106 | 904051000006110  |
| smoking cessation bupropion therapy                        | 904221000006110  | 904221000006106 | 904221000006110  |
| [rfc] smoking cessation                                    | 909391000006117  | 909391000006101 | 909391000006117  |
| smoking reduced                                            | 216212011        | 134406006       | 216212011        |
| current smoker nos                                         | 604961000006114  | 604961000006105 | 604961000006114  |
| smoker                                                     | 128130017        | 77176002        | 128130017        |
| ready to stop smoking                                      | 904001000006111  | 904001000006107 | 904001000006111  |
| waking time to first cigarette                             | 904041000006113  | 904041000006109 | 904041000006113  |
| carbon monoxide validation confirms smoker                 | 904121000006117  | 904121000006101 | 904121000006117  |
| cigarette smoker                                           | 108938018        | 65568007        | 108938018        |
| failed attempt to stop smoking                             | 1592611000000110 | 446172000       | 2882460017       |
| [v]tobacco use                                             | 460828018        | 110483000       | 175325014        |
| [x]mental and behavioural disorder due to use of tobacco   | 295951010        | 30310000        | 50736017         |
| varenicline smoking cessation therapy offered              | 2462431000000110 | 966991000000104 | 2462431000000110 |
| occasional smoker                                          | 397733018        | 428041000124106 | 2717161000000119 |
| smoking restarted                                          | 2670126018       | 308438006       | 2670126018       |
| minutes from waking to first tobacco consumption           | 2474719011       | 413173009       | 2474719011       |
| smoker - amount smoked                                     | 137721000006115  | 266918002       | 397730015        |
| thinking about stopping smoking                            | 1488576014       | 394871007       | 1488576014       |
| moderate smoker - 10-19 cigs/d                             | 700121000006118  | 160604004       | 250359011        |
| tobacco dependence, continuous                             | 295257016        | 191887008       | 295257016        |
| trivial smoker - < 1 cig/day                               | 88471000006112   | 266920004       | 397735013        |
| gradual smoking reduction                                  | 852111000006118  | 852111000006102 | 852111000006118  |
| current smoker                                             | 854071000006119  | 854071000006103 | 854071000006119  |
| tobacco consumption nos                                    | 250387019        | 266918002       | 397730015        |
| grade b light smoker (1-10/day)                            | 854961000006110  | 854961000006106 | 854961000006110  |
| rolls own cigarettes                                       | 852981000006111  | 852981000006107 | 852981000006111  |
| refuses stop smoking monitor                               | 285792013        | 765001003       | 3656021018       |
| heavy smoker - 20-39 cigs/day                              | 819331000006110  | 160605003       | 250360018        |
| [x]mental and behav dis due to use of tobacco: harmful use | 397911000006114  | 724697004       | 3445165019       |
| trying to give up smoking                                  | 250372012        | 160616005       | 250372012        |
| exposure to cigarette/cigar smoke                          | 981841000006115  | 981841000006104 | 981841000006115  |
| tobacco dependence nos                                     | 295260011        | 89765005        | 2951656017       |
| <b>Past smoker</b>                                         |                  |                 |                  |
| ex-smoker - amount unknown                                 | 250371017        | 8517006         | 15047015         |
| ex smoker                                                  | 649841000006110  | 8517006         | 15047015         |
| current non-smoker                                         | 250374013        | 160618006       | 250374013        |

|                                                            |                  |                 |                  |
|------------------------------------------------------------|------------------|-----------------|------------------|
| smoking cessation therapy nos                              | 489931000000114  | 710081004       | 3043296015       |
| ex-cigar smoker                                            | 852991000006114  | 852991000006105 | 852991000006114  |
| ex-smoker nos                                              | 853001000006110  | 853001000006106 | 853001000006110  |
| ex-trivial smoker (<1/day)                                 | 250363016        | 266921000       | 397736014        |
| ex-light smoker (1-9/day)                                  | 250364010        | 266922007       | 397737017        |
| ex-heavy smoker (20-39/day)                                | 250366012        | 266924008       | 397739019        |
| ex-very heavy smoker (40+/day)                             | 250367015        | 266925009       | 397740017        |
| past smoker                                                | 854111000006110  | 854111000006106 | 854111000006110  |
| ex cigar smoker                                            | 649821000006115  | 160621008       | 250377018        |
| ex- rolled tobacco smoker                                  | 649851000006112  | 649851000006108 | 649851000006112  |
| smoking cessation drug therapy                             | 482771000000118  | 713700008       | 3297364011       |
| smoking cessation therapy                                  | 492511000000117  | 710081004       | 3043296015       |
| ex-smoker annual review - enhanced services administration | 1123951000000110 | 505761000000105 | 1154471000000114 |
| ex-smoker nos                                              | 903041000006110  | 266928006       | 903041000006110  |
| cigarette pack-years                                       | 1780396011       | 401201003       | 1780396011       |
| ex-pipe smoker                                             | 854051000006112  | 854051000006108 | 854051000006112  |
| date stopped smoking                                       | 854151000006111  | 854151000006107 | 854151000006111  |
| tobacco dependence in remission                            | 295259018        | 191889006       | 295259018        |
| ex-cigarette smoker                                        | 418914010        | 281018007       | 418914010        |
| smoking cessation-maintain abstinence                      | 852121000006114  | 852121000006105 | 852121000006114  |
| other specified smoking cessation therapy                  | 482871000000111  | 710081004       | 3043296015       |
| cessation of smoking                                       | 2636041000006110 | 8517006         | 15048013         |
| stopped smoking                                            | 250373019        | 160617001       | 250373019        |
| ex pipe smoker                                             | 649831000006117  | 160620009       | 250376010        |
| ex-moderate smoker (10-19/day)                             | 250365011        | 266923002       | 397738010        |
| ex-cigarette smoker                                        | 649861000006114  | 649861000006105 | 649861000006114  |

**Table S47. Measurements Aurum codes**

| Term                                                                                                                                              | Medcode ID       | SNOMED CT<br>Concept ID | SNOMED CT<br>Description ID |
|---------------------------------------------------------------------------------------------------------------------------------------------------|------------------|-------------------------|-----------------------------|
| <b>Height</b>                                                                                                                                     |                  |                         |                             |
| O/E - height                                                                                                                                      | 923831000006115  | 923831000006104         | 923831000006115             |
| O/E - height                                                                                                                                      | 253669010        | 248333004               | 370729019                   |
| Estimated height                                                                                                                                  | 1910921000006114 | 1910921000006105        | 1910921000006114            |
| O/E - height NOS                                                                                                                                  | 253676017        | 248333004               | 370729019                   |
| Reported height                                                                                                                                   | 1910931000006112 | 1910931000006108        | 1910931000006112            |
| <b>Weight</b>                                                                                                                                     |                  |                         |                             |
| O/E - weight NOS                                                                                                                                  | 253688015        | 27113001                | 45352010                    |
| Baseline weight                                                                                                                                   | 1780175010       | 400967004               | 1780175010                  |
| Weight monitoring                                                                                                                                 | 451201014        | 307818003               | 451201014                   |
| Weight static                                                                                                                                     | 2536041016       | 271398006               | 2536041016                  |
| Reported weight                                                                                                                                   | 1910911000006118 | 1910911000006102        | 1910911000006118            |
| O/E - weight                                                                                                                                      | 923851000006110  | 923851000006106         | 923851000006110             |
| Weight screen                                                                                                                                     | 59281000006111   | 804271000000109         | 1798011000000116            |
| Estimated weight                                                                                                                                  | 1910901000006116 | 1910901000006100        | 1910901000006116            |
| O/E - weight                                                                                                                                      | 253677014        | 27113001                | 45352010                    |
| <b>BMI</b>                                                                                                                                        |                  |                         |                             |
| OBESITY MULTIDISCIPLINARY CASE REVIEW                                                                                                             | 2310101000000115 | 898011000000103         | 2310101000000115            |
| INTENSIVE WEIGHT MANAGEMENT PROGRAMME DECLINED                                                                                                    | 2326491000000114 | 904631000000104         | 2326491000000114            |
| OBESE CLASS I (BODY MASS INDEX 30.0 - 34.9)                                                                                                       | 2350241000000116 | 914721000000105         | 2350241000000116            |
| OBESE CLASS II (BODY MASS INDEX 35.0 - 39.9)                                                                                                      | 2350261000000115 | 914731000000107         | 2350261000000115            |
| BODY MASS INDEX                                                                                                                                   | 100716012        | 60621009                | 100716012                   |
| TREATMENT OF OBESITY STARTED                                                                                                                      | 264758010        | 170799008               | 264758010                   |
| REASON FOR OBESITY THERAPY - OCCUPATIONAL                                                                                                         | 264768017        | 170807005               | 264768017                   |
| OBESITY MONITORING NOS                                                                                                                            | 264769013        | 268522006               | 401534016                   |
| INTERVENTION FOR RISK TO HEALTH ASSOCIATED WITH OVERWEIGHT AND OBESITY, ADVICE ABOUT DIET AND PHYSICAL ACTIVITY                                   | 1753321000006116 | 756021000000103         | 1663521000000115            |
| INTERVENTION FOR RISK TO HEALTH ASSOCIATED WITH OVERWEIGHT AND OBESITY, ADVICE ABOUT DIET AND PHYSICAL ACTIVITY, CONSIDER DRUGS                   | 1753331000006118 | 756041000000105         | 1663561000000111            |
| INTERVENTION FOR RISK TO HEALTH ASSOCIATED WITH OVERWEIGHT AND OBESITY, ADVICE ABOUT DIET AND PHYSICAL ACTIVITY, CONSIDER DRUGS, CONSIDER SURGERY | 1753341000006111 | 756061000000106         | 1663601000000111            |
| BODY MASS INDEX LESS THAN 20                                                                                                                      | 453856012        | 310252000               | 453856012                   |
| BODY MASS INDEX NORMAL K/M2                                                                                                                       | 253844013        | 35425004                | 59104012                    |
| INTENSIVE WEIGHT MANAGEMENT PROGRAMME COMMENCED                                                                                                   | 2326311000000114 | 904551000000107         | 2326311000000114            |
| HAS SEEN DIETICIAN - OBESITY                                                                                                                      | 264756014        | 170797005               | 264756014                   |

|                                                                                                                        |                  |                  |                  |
|------------------------------------------------------------------------------------------------------------------------|------------------|------------------|------------------|
| BODY MASS INDEX 18.5-24.9                                                                                              | 1808071000006119 | 1808071000006103 | 1808071000006119 |
| BODY MASS INDEX 30+ - OBESITY                                                                                          | 253848011        | 162864005        | 253848011        |
| OBESITY MONITORING                                                                                                     | 401534016        | 268522006        | 401534016        |
| FOLLOW-UP OBESITY ASSESSMENT                                                                                           | 264753018        | 170795002        | 264753018        |
| TREATMENT OF OBESITY CHANGED                                                                                           | 264757017        | 170798000        | 264757017        |
| BODY MASS INDEX HIGH K/M2                                                                                              | 253845014        | 48499001         | 80800016         |
| BODY MASS INDEX LOW K/M2                                                                                               | 253846010        | 6497000          | 11777011         |
| INTENSIVE WEIGHT MANAGEMENT PROGRAMME ENDED                                                                            | 2326451000000118 | 904611000000107  | 2326451000000118 |
| TELEHEALTH OBESITY MONITORING                                                                                          | 2423851000000119 | 715279006        | 3302073018       |
| TREATMENT OF OBESITY STOPPED                                                                                           | 264759019        | 170800007        | 264759019        |
| ATTENDS SLIMMING CLINIC                                                                                                | 264760012        | 170801006        | 264760012        |
| BODY MASS INDEX 20-24 - NORMAL                                                                                         | 2474325012       | 412768003        | 2474325012       |
| RISK TO HEALTH ASSOCIATED WITH OVERWEIGHT AND OBESITY, AT HIGH RISK                                                    | 1753291000006113 | 755921000000105  | 1663311000000118 |
| BASELINE BODY MASS INDEX                                                                                               | 2196071000000116 | 846931000000101  | 2196071000000116 |
| BODY MASS INDEX LESS THAN 18.5                                                                                         | 1808061000006114 | 1808061000006105 | 1808061000006114 |
| OBESE CLASS III (BMI EQUAL TO OR GREATER THAN 40.0)                                                                    | 1900331000006113 | 914741000000103  | 2350281000000112 |
| BODY MASS INDEX 40+ - SEVERELY OBESE                                                                                   | 2160062010       | 408512008        | 2160062010       |
| BODY MASS INDEX CENTILE                                                                                                | 1551651000000111 | 446974000        | 2882934011       |
| BODY MASS INDEX INDEX 25-29 - OVERWEIGHT                                                                               | 253847018        | 162863004        | 253847018        |
| BODY MASS INDEX                                                                                                        | 923861000006112  | 923861000006108  | 923861000006112  |
| INITIAL OBESITY ASSESSMENT                                                                                             | 264752011        | 170794003        | 264752011        |
| RISK TO HEALTH ASSOCIATED WITH OVERWEIGHT AND OBESITY, AT NO INCREASED RISK                                            | 1753271000006112 | 755881000000104  | 1663231000000115 |
| RISK TO HEALTH ASSOCIATED WITH OVERWEIGHT AND OBESITY, AT INCREASED RISK                                               | 1753281000006110 | 755901000000101  | 1663271000000118 |
| RISK TO HEALTH ASSOCIATED WITH OVERWEIGHT AND OBESITY, AT VERY HIGH RISK                                               | 1753301000006114 | 755941000000103  | 1663351000000119 |
| INTERVENTION FOR RISK TO HEALTH ASSOCIATED WITH OVERWEIGHT AND OBESITY, GENERAL ADVICE ON HEALTHY WEIGHT AND LIFESTYLE | 1753311000006112 | 756001000000107  | 1663481000000115 |
| <b>Blood pressure and Heart rate</b>                                                                                   |                  |                  |                  |
| Systolic arterial pressure                                                                                             | 114311000006111  | 72313002         | 120159016        |
| Diastolic arterial pressure                                                                                            | 619931000006119  | 1091811000000102 | 2734671000000117 |
| Heart rate                                                                                                             | 487210016        | 364075005        | 487210016        |
| Baseline heart rate                                                                                                    | 2378591000000110 | 928001000000104  | 2378591000000110 |

**Table S48. Blood test Aurum codes**

| Term                                                                                                                                                    | Medcode ID        | SNOMED CT<br>Concept ID | SNOMED CT<br>Description ID |
|---------------------------------------------------------------------------------------------------------------------------------------------------------|-------------------|-------------------------|-----------------------------|
| <b>Creatinine</b>                                                                                                                                       |                   |                         |                             |
| EstimatedCreatinineClearance                                                                                                                            | 2470380013        | 395680003               | 2470380013                  |
| EstimatedCreatinineClearance(cockcroft-gaultFormula)                                                                                                    | 2465711000000116  | 968191000000100         | 2465711000000116            |
| SerumCreatinine                                                                                                                                         | 380389013         | 1000731000000107        | 2577271000000111            |
| <b>eGFR</b>                                                                                                                                             |                   |                         |                             |
| GfrCalculatedAbbreviatedMdrd                                                                                                                            | 976481000006110   | 1020291000000106        | 2569781000000116            |
| EgfrUsingCreatinine(ckd-epi)Per1.73SquareMetres                                                                                                         | 1942831000006114  | 1011481000000105        | 2579541000000113            |
| GlomerularFiltrationRate                                                                                                                                | 133205018         | 80274001                | 133205018                   |
| <b>Hb</b>                                                                                                                                               |                   |                         |                             |
| Haemoglobin estimation                                                                                                                                  | 813551000006113   | 1022431000000105        | 2553471000000116            |
| <b>HbA1C</b>                                                                                                                                            |                   |                         |                             |
| HbA1c (haemoglobin A1c) level (diagnostic reference range) - IFCC (International Federation of Clinical Chemistry and Laboratory Medicine) standardised | 1986181000006111  | 1049301000000100        | 2643101000000114            |
| HbA1c - Haemoglobin A1c level                                                                                                                           | 3199181000006110  | 43396009                | 493589010                   |
| Hemoglobin A1c (HBA1c) target                                                                                                                           | 6764291000006117  | 408591000               | 2621921019                  |
| HbA1c - Hemoglobin A1c level                                                                                                                            | 3199191000006113  | 43396009                | 493590018                   |
| HbA1c (haemoglobin A1c) target level - IFCC (International Federation of Clinical Chemistry and Laboratory Medicine) standardised                       | 1753211000006115  | 446074002               | 1725291000000118            |
| HbA1c measurement (DCCT aligned)                                                                                                                        | 6036701000006116  | 313835008               | 457955014                   |
| HBA1c (Hemoglobin A1c) level                                                                                                                            | 7285151000006113  | 443911005               | 2840604014                  |
| HbA1c level (Diabetes Control and Complications Trial aligned)                                                                                          | 457954013         | 1019431000000105        | 2566161000000115            |
| HbA1c (haemoglobin A1c) molar concentration in blood                                                                                                    | 12622041000006111 | 1107481000000106        | 2773291000000116            |
| HbA1c level (DCCT aligned)                                                                                                                              | 6036711000006118  | 313835008               | 457954013                   |
| HBA1c target                                                                                                                                            | 2160141012        | 408591000               | 1739591000000117            |
| HbA1c - Glycated hemoglobin-A1c                                                                                                                         | 7960911000006117  | 733830002               | 3474736019                  |
| HBA1c (Haemoglobin A1c) level                                                                                                                           | 7285141000006111  | 443911005               | 2840603015                  |
| Raised HbA1c level                                                                                                                                      | 1927791000006119  | 1927791000006103        | 1927791000006119            |
| HBA1c target                                                                                                                                            | 6764261000006113  | 408591000               | 2160141012                  |
| HbA1c (haemoglobin A1c) level (monitoring ranges) - IFCC (International Federation of Clinical Chemistry and Laboratory Medicine) standardised          | 1986191000006114  | 1049321000000109        | 2643141000000112            |
| Target HbA1c level                                                                                                                                      | 6764271000006118  | 408591000               | 2163995019                  |
| HbA1c - Glycated haemoglobin-A1c                                                                                                                        | 7960921000006113  | 733830002               | 3474737011                  |
| HbA1c (haemoglobin A1c) target - IFCC (International Federation of Clinical Chemistry and Laboratory Medicine) standardised                             | 7318701000006114  | 446074002               | 1725281000000115            |
| <b>Fasting lipids</b>                                                                                                                                   |                   |                         |                             |
| High cholesterol                                                                                                                                        | 2716221000006111  | 13644009                | 3035252016                  |
| Fasting serum cholesterol                                                                                                                               | 667191000006111   | 667191000006107         | 667191000006111             |
| Cholesterol/HDL ratio                                                                                                                                   | 457911015         | 313811003               | 457911015                   |



|                                                                                           |                   |                  |                  |
|-------------------------------------------------------------------------------------------|-------------------|------------------|------------------|
| Serum cholesterol very high                                                               | 259230019         | 166831007        | 259230019        |
| Non HDL cholesterol level                                                                 | 8411411000006113  | 1030411000000101 | 2595221000000113 |
| Serum cholesterol borderline high                                                         | 7261561000006118  | 442234001        | 2820789017       |
| Serum HDL (high density lipoprotein):non-HDL (high density lipoprotein) cholesterol ratio | 8396091000006112  | 1015271000000109 | 2607241000000118 |
| Cholesterol screening                                                                     | 5579571000006112  | 275972003        | 411949013        |
| Serum non HDL (high density lipoprotein) cholesterol level                                | 8386311000006116  | 1006191000000106 | 2607621000000111 |
| Serum cholesterol borderline                                                              | 12716491000006111 | 166829003        | 259228016        |
| Calculated LDL cholesterol level                                                          | 6550661000006112  | 395065005        | 1488764011       |
| Lipoprotein cholesterol ratio measurement                                                 | 6040921000006112  | 313988001        | 458247013        |
| HDL cholesterol                                                                           | 4079571000006118  | 102737005        | 166116016        |
| Target serum low density lipoprotein cholesterol level                                    | 8241901000006112  | 774851000000106  | 1730921000000119 |
| Estimated serum non-high density lipoprotein cholesterol level                            | 1924001000006115  | 920471000000100  | 2362791000000114 |
| Serum high density lipoprotein cholesterol level                                          | 259232010         | 1005681000000107 | 2577901000000110 |
| Serum random HDL (high density lipoprotein) cholesterol level                             | 259243019         | 1026461000000104 | 2599971000000117 |
| Serum random LDL (low density lipoprotein) cholesterol level                              | 259247018         | 1026481000000108 | 2599981000000115 |
| Serum total cholesterol measurement                                                       | 6831591000006111  | 412808005        | 2474364010       |
| High density lipoprotein cholesterol measurement                                          | 2949971000006113  | 28036006         | 46931018         |
| Total cholesterol level                                                                   | 8292941000006114  | 853681000000104  | 2210431000000111 |
| Cholesterol level                                                                         | 8290381000006115  | 850981000000101  | 2204831000000119 |
| Serum VLDL (very low density lipoprotein) cholesterol level                               | 259236013         | 1003441000000101 | 2607471000000113 |
| Serum fasting LDL (low density lipoprotein) cholesterol level                             | 259246010         | 1026471000000106 | 2599941000000111 |
| Total cholesterol:HDL (high density lipoprotein) ratio                                    | 259250015         | 1028551000000102 | 2602701000000112 |
| Plasma fasting HDL (high density lipoprotein) cholesterol level                           | 259567011         | 1028841000000102 | 2600031000000117 |
| HDL/total cholesterol ratio measurement                                                   | 4108441000006119  | 104583003        | 168549011        |
| Total cholesterol:HDL ratio measurement                                                   | 4600421000006112  | 166842003        | 259249015        |
| LDL-C (low density lipoprotein cholesterol) substance concentration in serum              | 12623411000006112 | 1108551000000102 | 2774161000000118 |
| Target serum LDL (low density lipoprotein) cholesterol level                              | 8241911000006110  | 774851000000106  | 1730931000000117 |
| Plasma cholesterol/HDL (high density lipoprotein) ratio                                   | 458252015         | 1015691000000106 | 2557701000000111 |
| Serum cholesterol/low density lipoprotein ratio                                           | 458253013         | 1015701000000106 | 2565681000000110 |
| Plasma cholesterol/LDL (low density lipoprotein) ratio                                    | 458256017         | 1015711000000108 | 2580131000000114 |
| Serum cholesterol/very low density lipoprotein ratio                                      | 458257014         | 1015721000000102 | 2557711000000113 |
| Plasma HDL (high density lipoprotein) cholesterol level                                   | 458313013         | 1010581000000101 | 2557051000000110 |
| Calculated LDL (low density lipoprotein) cholesterol level                                | 1488764011        | 1014501000000104 | 2552501000000118 |
| HDL - High density lipoprotein cholesterol level                                          | 2950001000006114  | 28036006         | 483733018        |
| Target serum high density lipoprotein cholesterol level                                   | 8241871000006112  | 774821000000101  | 1730851000000119 |
| Non-HDL cholesterol                                                                       | 6014411000006114  | 312260007        | 455948011        |

|                                                                              |                   |                  |                  |
|------------------------------------------------------------------------------|-------------------|------------------|------------------|
| Serum HDL cholesterol measurement                                            | 4600201000006115  | 166832000        | 259231015        |
| Fasting cholesterol level                                                    | 6052931000006111  | 315017003        | 459479011        |
| HDL (high density lipoprotein) cholesterol/total cholesterol ratio in plasma | 12622411000006116 | 1107731000000104 | 2771891000000118 |
| Serum fasting HDL (high density lipoprotein) cholesterol level               | 259242012         | 1026451000000102 | 2599931000000119 |
| LDL - Low density lipoprotein cholesterol level                              | 4217681000006112  | 113079009        | 380428016        |
| Serum HDL cholesterol level                                                  | 4600211000006117  | 166832000        | 259232010        |
| Cholesterol/HDL ratio measurement                                            | 6036221000006115  | 313811003        | 457910019        |
| Serum LDL cholesterol level                                                  | 4600241000006118  | 166833005        | 259233017        |
| Serum cholesterol borderline low                                             | 7263101000006113  | 442350007        | 2819746011       |
| Serum LDL cholesterol measurement                                            | 4600231000006111  | 166833005        | 259234011        |
| Serum total cholesterol level                                                | 6831601000006115  | 412808005        | 2478443019       |
| Serum cholesterol/high density lipoprotein ratio                             | 458249011         | 1015681000000109 | 2574851000000110 |
| Serum cholesterol level                                                      | 6279041000006119  | 365794002        | 489235016        |
| Serum cholesterol level                                                      | 150921000006118   | 1005671000000105 | 2551271000000118 |
| Total cholesterol:HDL ratio                                                  | 4600431000006110  | 166842003        | 259250015        |
| LDL cholesterol                                                              | 4079621000006115  | 102739008        | 166118015        |
| Serum cholesterol normal                                                     | 259227014         | 166828006        | 259227014        |
| Serum cholesterol raised                                                     | 259229012         | 166830008        | 259229012        |
| Hypercholesterolaemia                                                        | 475418015         | 13644009         | 475418015        |
| Serum triglyceride/HDL cholesterol ratio                                     | 1916571000006117  | 1916571000006101 | 1916571000006117 |
| Target serum total cholesterol level                                         | 8241111000006113  | 773271000000103  | 1726681000000112 |
| HDL (high density lipoprotein) cholesterol/total cholesterol ratio in serum  | 12622421000006112 | 1107741000000108 | 2771911000000115 |
| Serum cholesterol/HDL ratio                                                  | 6040951000006115  | 313989009        | 458249011        |
| Fasting lipids                                                               | 854781000006119   | 854781000006103  | 854781000006119  |
| Serum non high density lipoprotein cholesterol level                         | 2344491000000115  | 1006191000000106 | 2585861000000117 |
| Plasma random HDL (high density lipoprotein) cholesterol level               | 259564016         | 1028831000000106 | 2600041000000114 |
| Plasma random LDL (low density lipoprotein) cholesterol level                | 259569014         | 1028851000000104 | 2600051000000112 |
| Plasma fasting LDL (low density lipoprotein) cholesterol level               | 259570010         | 1028861000000101 | 2600061000000110 |
| Plasma cholesterol/VLDL (very low density lipoprotein) ratio                 | 458260019         | 1015731000000100 | 2580141000000117 |
| Serum HDL (high density lipoprotein) cholesterol level                       | 8385731000006118  | 1005681000000107 | 2607231000000110 |
| HDL (high density lipoprotein) cholesterol substance concentration in serum  | 12622321000006118 | 1107681000000108 | 2771791000000114 |
| HDL : total cholesterol ratio                                                | 4108451000006117  | 104583003        | 279462018        |
| HDL cholesterol level                                                        | 855771000006118   | 855771000006102  | 855771000006118  |
| Serum cholesterol borderline                                                 | 259228016         | 166829003        | 259228016        |
| Serum total cholesterol level                                                | 2478443019        | 994351000000103  | 2581451000000115 |
| Cholesterol                                                                  | 34521000033114    | 84698008         | 34521000033114   |
| Serum cholesterol NOS                                                        | 259252011         | 1005671000000105 | 2551271000000118 |
| Pre-treatment serum cholesterol level                                        | 1488851015        | 395153009        | 1488851015       |
| Serum HDL/non-HDL cholesterol ratio                                          | 5519791000006113  | 271059008        | 405628014        |

|                                                                               |                   |                  |                  |
|-------------------------------------------------------------------------------|-------------------|------------------|------------------|
| Serum cholesterol/HDL (high density lipoprotein) ratio                        | 8396611000006112  | 1015681000000109 | 2607531000000112 |
| Plasma LDL (low density lipoprotein) cholesterol level                        | 458314019         | 1010591000000104 | 2586471000000117 |
| Serum high density lipoprotein:non-high density lipoprotein cholesterol ratio | 144141000006119   | 1015271000000109 | 2565581000000114 |
| Serum low density lipoprotein cholesterol level                               | 259233017         | 1022191000000100 | 2566581000000116 |
| Cholesterol                                                                   | 3877651000006116  | 84698008         | 140417016        |
| LDL cholesterol level                                                         | 857141000006116   | 857141000006100  | 857141000006116  |
| Serum cholesterol/LDL ratio                                                   | 6041011000006113  | 313991001        | 458253013        |
| Low density lipoprotein cholesterol measurement                               | 4217651000006116  | 113079009        | 186163011        |
| Plasma total cholesterol level                                                | 1484985012        | 1017161000000104 | 2552911000000113 |
| Target cholesterol level                                                      | 1484928011        | 390896004        | 1484928011       |
| Target serum cholesterol                                                      | 107301000006115   | 107301000006104  | 107301000006115  |
| Total cholesterol measurement                                                 | 186091018         | 121868005        | 186091018        |
| Target serum non high density lipoprotein cholesterol level                   | 13602641000006117 |                  |                  |

**Table S49. Atrial ablation Aurum codes**

| Term                                                                                  | Medcode ID       | SNOMED CT Concept ID | SNOMED CT Description ID |
|---------------------------------------------------------------------------------------|------------------|----------------------|--------------------------|
| Open ablation of atrioventricular node                                                | 271176014        | 175095005            | 271176014                |
| Percutaneous transluminal ablation of atrioventricular node                           | 271209012        | 175125003            | 271209012                |
| Percutaneous transluminal ablation of accessory pathway                               | 2694913017       | 428581004            | 2694913017               |
| Percutaneous transluminal ablation of conducting system of heart                      | 238631000006110  | 448042001            | 2900001016               |
| Percutaneous transluminal chemical mediated septal ablation                           | 357821000000110  | 437746009            | 3037266010               |
| Percutaneous transluminal ablation of wall of atrium                                  | 376621000000113  | 428290007            | 2693316014               |
| Percutaneous transluminal laser ablation of vein                                      | 385021000000117  | 609165007            | 2958779019               |
| Percutaneous transluminal ablation of atrial wall NEC                                 | 488161000000110  | 428290007            | 2693316014               |
| Transluminal radiofreq ablation heart conducting system NEC                           | 998521000006116  | 448042001            | 2900001016               |
| Percutaneous transluminal ablation of congenital heart malformation                   | 1547441000006113 | 428391009            | 2692484013               |
| Percutaneous transluminal ablation of pulmonary vein to left atrium conducting system | 1587601000006117 | 707831001            | 3032482017               |
| Percutaneous transluminal ablation of atrial wall for atrial flutter                  | 1587611000006119 | 707832008            | 3032484016               |
| Percutaneous radiofrequency ablation of epicardium                                    | 1686211000000116 | 609233003            | 2958816014               |
| Catheter ablation of tissue of heart                                                  | 2790601000006119 | 18286008             | 30881015                 |
| Catheter ablation of lesion of heart                                                  | 3076931000006116 | 35823001             | 59752012                 |
| Ablation                                                                              | 3550661000006116 | 64597002             | 199515017                |
| Rotablation                                                                           | 3567581000006119 | 65659003             | 2478792014               |
| Radiofrequency ablation procedure phase                                               | 4422211000006110 | 129089003            | 207797015                |
| Ablation operation for arrhythmia                                                     | 5046591000006116 | 233159005            | 349323018                |
| Diathermy ablation operation for arrhythmia                                           | 5046601000006112 | 233160000            | 349324012                |
| Cryoablation operation for arrhythmia                                                 | 5046611000006110 | 233161001            | 349325013                |
| Laser ablation operation for arrhythmia                                               | 5046621000006119 | 233162008            | 349326014                |
| Radiofrequency ablation operation for arrhythmia                                      | 5046631000006116 | 233163003            | 349327017                |
| Ablation - action                                                                     | 5386721000006118 | 257729003            | 383646017                |
| Ablation                                                                              | 5386731000006115 | 257729003            | 383645018                |
| Cryoablation - action                                                                 | 5653621000006118 | 281609006            | 419659014                |
| Cryoablation                                                                          | 5653641000006113 | 281609006            | 419661017                |
| Radiofrequency ablation device                                                        | 6360191000006115 | 371791001            | 1210387010               |
| Ablation frequency                                                                    | 6450421000006111 | 386132006            | 1480316015               |
| Percutaneous transluminal coronary angioplasty by rotoablation                        | 6583111000006116 | 397193006            | 1776881019               |
| History of cardiac radiofrequency ablation                                            | 7081241000006112 | 427951003            | 2694709018               |
| Percutaneous transluminal ablation                                                    | 7087871000006111 | 428389001            | 2693563010               |
| Ablation of atrioventricular node                                                     | 7091821000006115 | 428663009            | 2693280013               |
| CT guided laser ablation                                                              | 7111561000006115 | 429929004            | 3027495010               |
| CT guided ablation                                                                    | 7117191000006114 | 430269006            | 3027505015               |
| Endocardial pulmonary vein ablation                                                   | 7142291000006112 | 431626004            | 706461000000113          |

|                                                                    |                  |           |            |
|--------------------------------------------------------------------|------------------|-----------|------------|
| Endocardial ablation of pulmonary vein using fluoroscopic guidance | 7142281000006114 | 431626004 | 2772721014 |
| Percutaneous transluminal septal myocardial ablation               | 7199391000006119 | 437746009 | 2793908011 |
| Catheter ablation for cardiac arrhythmia                           | 7484761000006112 | 473229000 | 2956223014 |
| Cardiac ultrasound ablation system                                 | 7556141000006117 | 702209009 | 3014237014 |
| Cardiac radiofrequency ablation system                             | 7594051000006116 | 704706000 | 3014227016 |
| Cardiac ablation system                                            | 7603631000006111 | 705732002 | 3024696011 |

**Table S50. Hyperthyroidism Auum codes**

| Term                                                        | Medcode ID       | SNOMED CT Concept ID | SNOMED CT Description ID |
|-------------------------------------------------------------|------------------|----------------------|--------------------------|
| H/O: hyperthyroidism                                        | 251587014        | 161442007            | 251587014                |
| Toxic adenomatous goitre                                    | 3438831000006118 | 57777000             | 497989019                |
| Toxic uninodular goitre with thyrotoxic crisis              | 3627481000006117 | 69329005             | 501258013                |
| Graves' eye disease                                         | 5581851000006111 | 276177000            | 2536088017               |
| Thyrotoxicosis without mention of goitre or cause no crisis | 101891000006113  | 90739004             | 150375010                |
| Thyrotoxicosis with toxic single thyroid nodule             | 3700961000006117 | 73869005             | 502554013                |
| Toxic multinodular goitre with crisis                       | 292342015        | 62278002             | 103507011                |
| Toxic diffuse goitre NOS                                    | 292331012        | 267374005            | 398780011                |
| Toxic uninodular goitre NOS                                 | 292338018        | 73869005             | 200396013                |
| Toxic multinodular goitre NOS                               | 292343013        | 26389007             | 196525014                |
| Thyrotoxicosis of other specified origin with no crisis     | 292361016        | 90739004             | 150375010                |
| Thyrotoxicosis without mention of goitre or other cause     | 292366014        | 90739004             | 150375010                |
| Graves' disease                                             | 472452010        | 353295004            | 472452010                |
| Thyrotoxicosis from ectopic thyroid tissue                  | 3918281000006110 | 87232008             | 507482011                |
| Thyrotoxicosis due to uninodular goitre                     | 3700971000006112 | 73869005             | 502555014                |
| Thyrotoxicosis with or without goiter                       | 5721001000006113 | 286909009            | 426394012                |
| Thyrotoxicosis from ectopic thyroid nodule                  | 507481016        | 87232008             | 507481016                |
| Thyrotoxic exophthalmos                                     | 33469013         | 19885005             | 33469013                 |
| Toxic multinodular goitre with thyrotoxic storm             | 3511901000006114 | 62278002             | 499238017                |
| Toxic multinodular goitre with thyrotoxic crisis            | 3511871000006114 | 62278002             | 499237010                |
| Hyperthyroidism                                             | 57561015         | 34486009             | 57561015                 |
| Hyperthyroidism due to ectopic thyroid tissue               | 4757781000006116 | 190255006            | 3035757011               |
| Thyrotoxicosis due to multinodular goitre                   | 2922501000006118 | 26389007             | 483220013                |
| History of hyperthyroidism                                  | 4539511000006111 | 161442007            | 2986456017               |
| Toxic multinodular thyroid goitre                           | 2922531000006114 | 26389007             | 3036943012               |
| [RFC] Hyperthyroidism                                       | 905741000006112  | 905741000006108      | 905741000006112          |
| Toxic diffuse goitre with crisis                            | 292330013        | 190242005            | 292330013                |
| Toxic diffuse goitre                                        | 398780011        | 267374005            | 398780011                |
| Graves' ophthalmopathy                                      | 5581801000006112 | 276177000            | 2536083014               |
| Toxic multinodular thyroid goiter                           | 2922521000006111 | 26389007             | 3036654016               |
| Toxic uninodular goitre                                     | 200396013        | 73869005             | 200396013                |
| Thyrotoxicosis of other specified origin                    | 398782015        | 90739004             | 150375010                |
| Thyrotoxicosis with diffuse goiter                          | 5500071000006116 | 267374005            | 398778017                |
| Thyrotoxicosis of other specified origin NOS                | 292365013        | 90739004             | 150375010                |
| Toxic uninodular goitre with thyrotoxic storm               | 3627511000006113 | 69329005             | 200068013                |
| Toxic nodular goitre unspecified                            | 292346017        | 57777000             | 497988010                |
| Toxic multinodular goiter with thyrotoxic crisis            | 3511881000006112 | 62278002             | 103507011                |
| Thyrotoxicosis due to uninodular goiter                     | 3700981000006110 | 73869005             | 502556010                |
| Thyrotoxicosis due to multinodular goiter                   | 2922481000006111 | 26389007             | 483218010                |

|                                                             |                  |           |                 |
|-------------------------------------------------------------|------------------|-----------|-----------------|
| Toxic multinodular goiter with thyrotoxic storm             | 3511891000006110 | 62278002  | 103508018       |
| Toxic nodular goitre unspecified with no crisis             | 292347014        | 57777000  | 96075015        |
| Diffuse toxic goitre                                        | 5500051000006114 | 267374005 | 398776018       |
| Thyrotoxicosis from ectopic thyroid nodule with no crisis   | 292355019        | 190255006 | 292355019       |
| Thyrotoxicosis from ectopic thyroid nodule with crisis      | 292356018        | 190256007 | 292356018       |
| Toxic uninodular goitre with crisis                         | 292335015        | 69329005  | 115161014       |
| Toxic diffuse goitre with no crisis                         | 292327018        | 190241003 | 292327018       |
| Thyrotoxicosis with toxic multinodular goitre               | 2922511000006115 | 26389007  | 483221012       |
| Toxic nodular goiter                                        | 3438791000006113 | 57777000  | 96075015        |
| Thyrotoxicosis without mention of goitre, cause with crisis | 101911000006110  | 90739004  | 150375010       |
| Toxic nodular goitre NOS                                    | 292354015        | 57777000  | 497988010       |
| Thyrotoxicosis NOS                                          | 292372014        | 90739004  | 150375010       |
| Toxic uninodular thyroid goitre                             | 3700991000006113 | 73869005  | 3035712019      |
| Toxic multinodular goiter                                   | 2922461000006118 | 26389007  | 44198012        |
| Graves' dermopathy                                          | 5112881000006118 | 237825005 | 356407011       |
| Toxic goitre                                                | 355932011        | 237498007 | 355932011       |
| Toxic multinodular goitre                                   | 196525014        | 26389007  | 196525014       |
| Thyrotoxicosis with toxic multinodular goiter               | 2922491000006114 | 26389007  | 483219019       |
| Thyrotoxicosis +/- goitre                                   | 881371000006111  | 286909009 | 881371000006111 |
| Toxic diffuse thyroid goitre                                | 5500101000006114 | 267374005 | 3037800012      |
| Thyrotoxic myopathy                                         | 3613541000006112 | 68437005  | 113658014       |
| Thyrotoxicosis with or without goitre                       | 5720991000006112 | 286909009 | 426395013       |
| Thyrotoxic crisis                                           | 2966801000006110 | 29028009  | 48598011        |
| Hyperthyroidism resolved                                    | 2548990010       | 416477006 | 2548990010      |
| Thyrotoxicosis from ectopic thyroid nodule NOS              | 292357010        | 87232008  | 144647016       |
| Thyrotoxicosis of other specified origin with crisis        | 292362011        | 90739004  | 150375010       |
| Thyrotoxicosis with diffuse goitre                          | 5500041000006112 | 267374005 | 398775019       |
| Toxic multinodular goiter with no crisis                    | 4757741000006110 | 190247004 | 292340011       |
| Hyperthyroidism due to ectopic thyroid nodule               | 3918261000006117 | 87232008  | 144647016       |
| Thyrotoxic heart disease                                    | 100438013        | 60446003  | 100438013       |
| Thyrotoxicosis                                              | 150375010        | 90739004  | 150375010       |
| Toxic uninodular goitre with no crisis                      | 292334016        | 190244006 | 292334016       |
| Toxic multinodular goitre with no crisis                    | 292339014        | 190247004 | 292339014       |
| Toxic nodular goitre unspecified with crisis                | 292350012        | 57777000  | 96075015        |

**Table S51. Hypothyroidism Aurum codes**

| Term                                                    | Medcode ID        | SNOMED CT Concept ID | SNOMED CT Description ID |
|---------------------------------------------------------|-------------------|----------------------|--------------------------|
| Myasthenic syndrome due to hypothyroidism               | 297588017         | 193212008            | 297588017                |
| Congenital hypothyroidism with diffuse goitre           | 415432015         | 278503003            | 415432015                |
| H/O: hypothyroidism                                     | 251589012         | 161443002            | 251589012                |
| Hypothyroidism annual review                            | 637341000000118   | 341861000000109      | 637341000000118          |
| Hypothyrotropic hypothyroidism                          | 3843711000006117  | 82598004             | 505170011                |
| Congenital hypothyroidism with diffuse goiter           | 5614081000006117  | 278503003            | 415433013                |
| Postsurgical hypothyroidism                             | 2933341000006117  | 27059002             | 2536050019               |
| Primary hypothyroidism AND adrenocortical insufficiency | 3862381000006114  | 83728000             | 505751010                |
| Other postablative hypothyroidism                       | 292394018         | 237527007            | 355975017                |
| Postablative hypothyroidism NOS                         | 292396016         | 237527007            | 355975017                |
| Cerebral degeneration due to myxoedema                  | 542671000006117   | 192816007            | 297016016                |
| Diabetes mellitus, Addison's disease and myxoedema      | 3862341000006115  | 83728000             | 505747013                |
| Myxoedema                                               | 493538010         | 43153006             | 493538010                |
| Endemic cretinism - neurological type                   | 5108961000006115  | 237566004            | 356025012                |
| Total substernal thyroidectomy                          | 858351000006117   | 52826006             | 858351000006117          |
| Complete thyroidectomy                                  | 40998019          | 24443003             | 40998019                 |
| Other acquired hypothyroidism                           | 12729831000006113 | 654491000000108      | 1438601000000113         |
| Hypothyroidism with positive thyroid antibodies         | 5108381000006112  | 237519003            | 355965015                |
| Hypothyroidism-congen.+ acqui.                          | 881381000006114   | 111566002            | 881381000006114          |
| Primary hypothyroidism                                  | 4197341000006114  | 111566002            | 363808017                |
| Congenital hypothyroidism without goitre                | 355957018         | 237515009            | 355957018                |
| Autoimmune myxoedema                                    | 355964016         | 237519003            | 355964016                |
| Post-infectious hypothyroidism                          | 5108491000006117  | 237528002            | 355976016                |
| Cretinism                                               | 600791000006112   | 217710005            | 329968011                |
| Irradiation hypothyroidism                              | 292395017         | 190277005            | 292395017                |
| Hypothyroidism resulting from phenylbutazone            | 292402012         | 190283008            | 292402012                |
| Acquired hypothyroidism                                 | 178809013         | 111566002            | 178809013                |
| Hypothyroidism monitoring verbal invite                 | 2548835019        | 416326003            | 2548835019               |
| Congenital hypothyroidism NOS                           | 398783013         | 190268003            | 292373016                |
| Postoperative hypothyroidism                            | 2933321000006112  | 27059002             | 2532363015               |
| Hypothyroidism monitoring administration                | 940091000006115   | 940091000006104      | 940091000006115          |
| Hypothyroidism monitoring invite 2                      | 940111000006112   | 940111000006108      | 940111000006112          |
| Hypothyroidism monitoring invite 3                      | 940121000006116   | 940121000006100      | 940121000006116          |
| Hypothyroidism monitoring administration                | 225971000000116   | 713741000000106      | 1564981000000116         |
| Hypothyroidism monitoring telephone invitation          | 406721000000115   | 248341000000100      | 406721000000115          |
| Iatrogenic hypothyroidism                               | 292400016         | 88273006             | 146340011                |
| Iatrogenic hypothyroidism NOS                           | 292404013         | 88273006             | 146340011                |
| Myxoedema encephalopathy                                | 4768951000006118  | 192816007            | 297016016                |
| Other acquired hypothyroidism                           | 292408011         | 111566002            | 178809013                |



|                                                           |                   |                  |                  |
|-----------------------------------------------------------|-------------------|------------------|------------------|
| Hypothyroidism clinical management plan                   | 2474336017        | 736287007        | 3517030018       |
| Post-surgical hypothyroidism                              | 2536050019        | 27059002         | 45271010         |
| Autoimmune hypothyroidism                                 | 5108351000006116  | 237519003        | 355966019        |
| Acquired hypothyroidism NOS                               | 881391000006112   | 654491000000108  | 881391000006112  |
| Hypothyroidism resulting from para-aminosalicylic acid    | 292401017         | 190282003        | 292401017        |
| History of hypothyroidism                                 | 4539531000006117  | 161443002        | 2986407018       |
| Endemic cretinism - mixed type                            | 5108941000006119  | 237565000        | 356023017        |
| Hypothyroidism NOS                                        | 12727341000006116 | 681051000000104  | 1492161000000113 |
| Hypothyroidism confirmed                                  | 1823931000006116  | 1823931000006100 | 1823931000006116 |
| [X]Systemic atrophy affecting the CNS in myxoedema        | 428591000006112   | 23853001         | 40063015         |
| Postinfectious hypothyroidism                             | 211321000006115   | 237528002        | 355976016        |
| Congenital hypothyroidism without goiter                  | 5108301000006115  | 237515009        | 355958011        |
| Congenital iodine-deficiency syndrome, myxoedematous type | 583291000006115   | 75065003         | 502897012        |
| Atrophy of thyroid - acquired                             | 5108811000006113  | 237558008        | 356013014        |
| Hypothyroidism resulting from resorcinol                  | 292403019         | 190284002        | 292403019        |
| Congenital thyroid insufficiency                          | 588661000006115   | 190268003        | 292373016        |
| Myopathy due to myxoedema                                 | 682701000006117   | 87844004         | 507778013        |
| Complete parathyroidectomy                                | 2696261000006111  | 12330002         | 21229013         |
| Hypothyroidism monitoring second letter                   | 2533534011        | 414441001        | 2533534011       |
| Hypothyroidism medication review                          | 939981000006114   | 939981000006105  | 939981000006114  |
| Hypothyroidism monitoring invite 1                        | 940101000006114   | 940101000006105  | 940101000006114  |
| Hypothyroidism with sensorineural deafness                | 3644031000006116  | 70348004         | 116847011        |
| Pretibial myxoedema - hypothyroid                         | 208391000006113   | 40930008         | 68268011         |
| Thyroid insufficiency                                     | 101581000006112   | 40930008         | 68268011         |
| Acquired hypothyroidism NOS                               | 988831000006119   | 111566002        | 988831000006119  |
| Goitrous cretin                                           | 415431010         | 278503003        | 415431010        |
| Endemic cretinism                                         | 12704331000006114 | 75065003         | 124678011        |
| Myxoedema coma                                            | 35727012          | 21263006         | 35727012         |
| Acquired thyroid atrophy                                  | 5108831000006119  | 237558008        | 3037562011       |
| Hypothyroidism NOS                                        | 398784019         | 40930008         | 68268011         |
| Congenital hypothyroidism                                 | 292373016         | 190268003        | 292373016        |
| Thyroid atrophy                                           | 292448015         | 190309006        | 292448015        |
| Other specified congenital hypothyroidism                 | 292376012         | 190268003        | 292373016        |
| Myxoedema myopathy                                        | 3927661000006113  | 87844004         | 507778013        |
| Total thyroidectomy                                       | 40996015          | 24443003         | 40996015         |
| Cretinism                                                 | 329968011         | 217710005        | 329968011        |
| Hypothyroidism monitoring third letter                    | 2533420013        | 414442008        | 2533420013       |
| Hypothyroidism monitoring first letter                    | 2533422017        | 414439002        | 2533422017       |
| Hypothyroidism after surgery                              | 2933351000006115  | 27059002         | 3037380018       |
| Cerebellar ataxia due to myxoedema                        | 542301000006117   | 192876003        | 297115015        |
| [X]Other sp cified hypothyroidism                         | 413721000006119   | 40930008         | 68268011         |

|                                                            |                  |                  |                  |
|------------------------------------------------------------|------------------|------------------|------------------|
| Myxoedema cerebellar degeneration                          | 4769091000006117 | 192876003        | 297115015        |
| Congenital hypothyroidism not due to iodine deficiency     | 4904391000006111 | 217710005        | 329969015        |
| Hypothyroidism clinical management plan no longer in place | 1877411000006112 | 1877411000006108 | 1877411000006112 |
| Endemic cretinism - hypothyroid                            | 3720391000006119 | 75065003         | 502894017        |
| Acquired atrophy of thyroid                                | 356012016        | 237558008        | 356012016        |
| Aplasia of thyroid with myxoedema                          | 4012861000006111 | 92978002         | 510171015        |
| Thyroid deficiency                                         | 101171000006116  | 40930008         | 68268011         |
| Postablative hypothyroidism                                | 216181000006112  | 237527007        | 355975017        |
| Hypothyroidism                                             | 68268011         | 40930008         | 68268011         |
| Iodine hypothyroidism                                      | 292397013        | 190279008        | 292397013        |

**Table S52. Chronic obstructive pulmonary disease Aurum codes**

| Term                                                                         | Medcode ID        | SNOMED CT<br>Concept ID | SNOMED CT<br>Description ID |
|------------------------------------------------------------------------------|-------------------|-------------------------|-----------------------------|
| COPD GOLD group C                                                            | 11932351000006110 | 11932351000006106       | 11932351000006110           |
| COPD GOLD group D                                                            | 11932361000006112 | 11932361000006108       | 11932361000006112           |
| Chronic asthmatic bronchitis                                                 | 301450011         | 195949008               | 301450011                   |
| Chronic wheezy bronchitis                                                    | 301451010         | 195949008               | 301451010                   |
| Chronic bullous emphysema                                                    | 301460019         | 195957006               | 301460019                   |
| Segmental bullous emphysema                                                  | 301463017         | 195958001               | 301463017                   |
| Zonal bullous emphysema                                                      | 301464011         | 195959009               | 301464011                   |
| Access to online patient COPD education given                                | 1916531000006115  | 1916531000006104        | 1916531000006115            |
| Mild chronic obstructive pulmonary disease                                   | 457168017         | 313296004               | 457168017                   |
| Moderate chronic obstructive pulmonary disease                               | 457169013         | 313297008               | 457169013                   |
| Severe chronic obstructive pulmonary disease                                 | 457171013         | 313299006               | 457171013                   |
| COPD (chronic obstructive pulmonary disease) 6<br>monthly review             | 8235131000006118  | 760621000000103         | 1710191000000113            |
| COPD self-management plan review                                             | 1811741000006117  | 810951000000101         | 2115731000000110            |
| On COPD (chr obstruc pulmonary disease)<br>supportv cre pathway              | 1813881000006119  | 826111000000109         | 2155811000000119            |
| Asthma-chronic obstructive pulmonary disease<br>overlap syndrom              | 1948051000006112  | 10692761000119107       | 3046456013                  |
| Chron obstruct pulmonary dis wth acute<br>exacerbation, unspec               | 553211000006119   | 195951007               | 301453013                   |
| Chr. airway obstruction NOS                                                  | 990651000006112   | 13645005                | 990651000006112             |
| Chronic obstructive pulmonary disease                                        | 475431013         | 13645005                | 475431013                   |
| Admit COPD emergency                                                         | 12489801000006116 | 408501008               | 2160051010                  |
| Telehealth chronic obstructive pulmonary disease<br>monitoring               | 2423731000000115  | 716358000               | 3305683010                  |
| COPD (chronic obstructive pulmonary disease)<br>disturbs sleep               | 8058301000006110  | 198401000000104         | 1677391000000113            |
| Chronic bronchitis, acute exac                                               | 851261000006116   | 851261000006100         | 851261000006116             |
| Simple chronic bronchitis NOS                                                | 301444018         | 61937009                | 102938011                   |
| Other chronic bronchitis NOS                                                 | 301458016         | 63480004                | 105519017                   |
| Chronic bullous emphysema NOS                                                | 301468014         | 195957006               | 301460019                   |
| COPD patient unsuitable for pulmonary<br>rehabilitation                      | 1656601000006119  | 1656601000006103        | 1656601000006119            |
| Giant bullous emphysema                                                      | 27096010          | 16003001                | 27096010                    |
| Shared care COPD (chronic obstructive pulmonary<br>disease) monitoring       | 8316481000006116  | 897311000000101         | 2312551000000112            |
| Panacinar emphysema                                                          | 2578881000006118  | 4981000                 | 9336013                     |
| Chronic obstructive pulmonary disease disturbs<br>sleep                      | 299001000000116   | 198401000000104         | 299001000000116             |
| Obliterative bronchiolitis due to chemical fumes                             | 269761000006112   | 196027008               | 301573017                   |
| Not suitable for step down change in COPD<br>management plan                 | 2009511000006113  | 2009511000006109        | 2009511000006113            |
| Acute non-infective exacerbation of chronic<br>obstructive pulmonary disease | 2010061000006113  | 847091000000104         | 2196421000000114            |
| COPD (chronic obstructive pulmonary disease) care<br>pathway                 | 8288261000006119  | 848431000000106         | 2199291000000116            |
| ACOS - asthma-chronic obstructive pulmonary<br>disease overlap syndrome      | 9317341000006115  | 10692761000119107       | 2496071000000117            |

|                                                                                                                      |                   |                  |                  |
|----------------------------------------------------------------------------------------------------------------------|-------------------|------------------|------------------|
| Acute exacerbation of COPD                                                                                           | 4781421000006111  | 195951007        | 3012683010       |
| Obstructive chronic bronchitis                                                                                       | 4733021000006111  | 185086009        | 285104011        |
| MacLeod's unilateral emphysema                                                                                       | 1230190015        | 45145000         | 1230190015       |
| Seen in chronic obstructive pulmonary disease clinic                                                                 | 1839331000006117  | 1839331000006101 | 1839331000006117 |
| QOF (Quality and Outcomes Framework) chronic obstructive pulmonary disease quality indicator-related care invitation | 12626281000006113 | 1110861000000102 | 2779701000000115 |
| Chronic obstructive pulmonary disease annual review                                                                  | 1488424013        | 394703002        | 1488424013       |
| Chronic obstructive pulmonary disease leaflet given                                                                  | 1488856013        | 395159008        | 1488856013       |
| Chronic obstructive pulmonary disease monitoring by nurse                                                            | 1780380013        | 401184000        | 1780380013       |
| Chronic obstructive pulmonary disease monitoring by doctor                                                           | 1780381012        | 401185004        | 1780381012       |
| Centrilobular emphysema                                                                                              | 113497011         | 68328006         | 113497011        |
| COB - Chronic obstructive bronchitis                                                                                 | 4733011000006115  | 185086009        | 285103017        |
| COPD (chronic obstructive pulmonary disease) management plan declined                                                | 8312921000006111  | 892321000000109  | 2297721000000117 |
| Chronic obstructive pulmonary disease severity                                                                       | 1856571000006116  | 1856571000006100 | 1856571000006116 |
| Chronic bronchitis with emphysema                                                                                    | 4732991000006119  | 185086009        | 285101015        |
| Chronic emphysema caused by chemical fumes                                                                           | 4781821000006113  | 196026004        | 3296151011       |
| COPD follow-up                                                                                                       | 845451000006118   | 394702007        | 1488423019       |
| COPD structured smoking assessment declined                                                                          | 1704581000006119  | 375911000000102  | 739421000000116  |
| [RFC] Chronic obstructive pulmonary disease (COPD)                                                                   | 909711000006111   | 909711000006107  | 909711000006111  |
| [RFC] Emphysema                                                                                                      | 909721000006115   | 909721000006104  | 909721000006115  |
| Atrophic (senile) emphysema                                                                                          | 396109014         | 266356006        | 396109014        |
| 1 COPD exacerbation in past year                                                                                     | 1882421000006113  | 1882421000006109 | 1882421000006113 |
| 3+ COPD exacerbations in past year                                                                                   | 1882431000006111  | 1882431000006107 | 1882431000006111 |
| 2 COPD exacerbations in past year                                                                                    | 1882441000006118  | 1882441000006102 | 1882441000006118 |
| Interstitial emphysema                                                                                               | 12704691000006117 | 77690003         | 770361000006117  |
| COLD - Chronic obstructive lung disease                                                                              | 2716351000006113  | 13645005         | 475430014        |
| COPD (Chronic obstructive pulmonary disease) patient unsuitable for pulmonary rehabilitation                         | 8120981000006112  | 371611000000107  | 730041000000110  |
| COPD (chronic obstructive pulmonary disease) written self management plan declined                                   | 8294671000006116  | 857811000000102  | 2219931000000113 |
| COPD medication review                                                                                               | 939991000006112   | 939991000006108  | 939991000006112  |
| COPD monitoring administration                                                                                       | 940131000006118   | 940131000006102  | 940131000006118  |
| COPD monitoring invite 2                                                                                             | 940151000006113   | 940151000006109  | 940151000006113  |
| COPD monitoring invite 3                                                                                             | 940161000006110   | 940161000006106  | 940161000006110  |
| Chronic obstructive pulmonary disease monitoring verb invite                                                         | 967571000006116   | 716281000000103  | 1568831000000118 |
| Emergency COPD admission since last appointment                                                                      | 977901000006111   | 414087000        | 2533539018       |
| Refer COPD structured smoking assessment - enhanc serv admin                                                         | 1704561000006112  | 375851000000108  | 739301000000115  |
| COPD structured smoking assessment declined - enh serv admin                                                         | 1704571000006117  | 375911000000102  | 739421000000116  |
| Mucopurulent chronic bronchitis NOS                                                                                  | 301448015         | 74417001         | 123588010        |
| End stage chronic obstructive pulmonary disease                                                                      | 4510801000006114  | 135836000        | 3034045017       |

|                                                                                                                         |                   |                   |                   |
|-------------------------------------------------------------------------------------------------------------------------|-------------------|-------------------|-------------------|
| Chronic obstructive pulmonary disease 3 monthly review                                                                  | 1683181000000112  | 760601000000107   | 1683181000000112  |
| Bullous emphysema with collapse                                                                                         | 396108018         | 266355005         | 396108018         |
| Preferred place of care for next exacerbation of COPD                                                                   | 1784071000006113  | 789661000000102   | 1765431000000114  |
| GP OOH service notified of COPD care plan                                                                               | 1785171000006113  | 783631000000109   | 1752261000000117  |
| Health education - chronic obstructive pulmonary disease                                                                | 405121000000111   | 741056003         | 3543021016        |
| Chronic obstructive pulmonary disease care pathway                                                                      | 2199261000000110  | 848431000000106   | 2199261000000110  |
| COPD (chronic obstructive pulmonary disease) rescue pack declined                                                       | 8294651000006114  | 857791000000103   | 2219871000000119  |
| Interstitial emphysema                                                                                                  | 19421011          | 77690003          | 503646013         |
| Optimization of medication for chronic obstructive lung disease                                                         | 7484341000006112  | 473202005         | 2956280014        |
| Step down change in chronic obstructive pulmonary disease management plan                                               | 3011135010        | 704123000         | 3011135010        |
| Suitable for step down change in COPD management plan                                                                   | 2009501000006110  | 2009501000006106  | 2009501000006110  |
| Acute infective exacerbation of chronic obstructive airways disease                                                     | 424365019         | 285381006         | 424365019         |
| Chronic obstructive pulmonary disease post discharge review                                                             | 2009451000006113  | 2009451000006109  | 2009451000006113  |
| Acute non-infective exacerbation of COPD (chronic obstructive pulmonary disease)                                        | 8287171000006115  | 847091000000104   | 2196431000000111  |
| COPD self-management plan given                                                                                         | 839001000006111   | 390891009         | 1484924013        |
| [X]Other emphysema                                                                                                      | 301835010         | 87433001          | 144964015         |
| Other emphysema NOS                                                                                                     | 396110016         | 87433001          | 144964015         |
| COPD GOLD group A                                                                                                       | 11932331000006115 | 11932331000006104 | 11932331000006115 |
| Chr. airway obstruction NOS                                                                                             | 885301000006119   | 611541000000106   | 885301000006119   |
| Acute exacerbation of chronic obstructive airways disease                                                               | 301453013         | 195951007         | 301453013         |
| Chronic obstructive pulmonary disease monitoring 1st letter                                                             | 189761000000117   | 716241000000106   | 1568801000000112  |
| Issue of COPD (chronic obstructive pulmonary disease) rescue pack                                                       | 8219501000006114  | 718241000000107   | 1573141000000119  |
| Shared care chronic obstructive pulmonary disease monitoring                                                            | 1882371000006118  | 1882371000006102  | 1882371000006118  |
| COPD (chronic obstructive pulmonary disease) does not disturb sleep                                                     | 8058321000006117  | 198411000000102   | 1677401000000111  |
| GP (general practitioner) OOH (out of hours) service notified of COPD (chronic obstructive pulmonary disease) care plan | 8244871000006114  | 783631000000109   | 1752291000000111  |
| Fetid chronic bronchitis                                                                                                | 3873191000006110  | 84409004          | 139979010         |
| Chronic catarrhal bronchitis                                                                                            | 508562012         | 89549007          | 508562012         |
| COPD (chronic obstructive pulmonary disease) 3 monthly review                                                           | 8235101000006114  | 760601000000107   | 1709911000000112  |
| COPD clinical pathway protocol followed                                                                                 | 1824071000006115  | 1824071000006104  | 1824071000006115  |
| Chronic obstruct pulmonary dis with acute lower resp infectn                                                            | 555461000006119   | 196001008         | 301542016         |
| Vesicular emphysema                                                                                                     | 2578901000006116  | 4981000           | 9338014           |
| Chronic obstructive pulmonary disease monitoring due                                                                    | 1484971019        | 390941006         | 1484971019        |
| Chronic obstructive pulmonary disease follow-up                                                                         | 1488423019        | 394702007         | 1488423019        |
| Interstitial pulmonary emphysema                                                                                        | 3764031000006119  | 77690003          | 3764031000006119  |
| Mixed simple and mucopurulent chronic bronchitis                                                                        | 301456017         | 195953005         | 301456017         |

|                                                                        |                  |                 |                  |
|------------------------------------------------------------------------|------------------|-----------------|------------------|
| Acute vesicular emphysema                                              | 301470017        | 195963002       | 301470017        |
| Chronic obstructive bronchitis                                         | 4733031000006114 | 185086009       | 2668815014       |
| Suspected chronic obstructive pulmonary disease                        | 314261000000118  | 204991000000107 | 314261000000118  |
| Optimisation of medication for chronic obstructive lung disease        | 7484351000006114 | 473202005       | 3297724010       |
| Chronic obstructive airways disease                                    | 555471000006114  | 13645005        | 475423015        |
| Emphysema                                                              | 640491000006111  | 87433001        | 144964015        |
| Chronic obstructive pulmonary disease monitoring admin                 | 967531000006119  | 713731000000102 | 1564971000000118 |
| Bullous emphysema                                                      | 4781471000006112 | 195957006       | 301462010        |
| Referral to COPD community nursing team                                | 1784371000006111 | 790301000000101 | 1766811000000114 |
| Chronic obstructive pulmonary disease clini management plan            | 966841000006111  | 736283006       | 3517019016       |
| Chronic obst. pulm. dis. NOS                                           | 885311000006116  | 611541000000106 | 885311000006116  |
| Emphysema of lung                                                      | 3921361000006112 | 87433001        | 144967010        |
| Other chronic bronchitis                                               | 301457014        | 63480004        | 105519017        |
| Chronic bronchitis NOS                                                 | 301459012        | 63480004        | 105519017        |
| [X]Other specified chronic obstructive pulmonary disease               | 301836011        | 13645005        | 475431013        |
| Seen in chronic obstructive pulmonary disease clinic                   | 2219551000000113 | 857661000000104 | 2219551000000113 |
| Very severe chronic obstructive pulmonary disease                      | 516801000000112  | 293991000000106 | 516801000000112  |
| Chronic emphysema due to chemical fumes                                | 301572010        | 196026004       | 301572010        |
| Chronic bronchitis                                                     | 105519017        | 63480004        | 105519017        |
| End stage chronic obstructive airways disease                          | 216596014        | 135836000       | 216596014        |
| Has chronic obstructive pulmonary disease care plan                    | 2152091000000112 | 827571000000106 | 2152091000000112 |
| Seen in COPD (chronic obstructive pulmonary disease) clinic            | 8294561000006110 | 857661000000104 | 2219581000000119 |
| Centriacinar emphysema                                                 | 3611791000006110 | 68328006        | 113496019        |
| Chronic obstructive lung disease                                       | 2716231000006114 | 13645005        | 23287019         |
| Emergency hospital admission for chronic obstructive pulmonary disease | 6763231000006119 | 408501008       | 6763231000006119 |
| Panlobular emphysema                                                   | 9337016          | 4981000         | 9337016          |
| Shared care chronic obstructive pulmonary disease monitoring           | 2308511000000113 | 897311000000101 | 2308511000000113 |
| Chronic obstructive airways disease NOS                                | 301545019        | 13645005        | 475428012        |
| Obstructive chronic bronchitis NOS                                     | 301455018        | 185086009       | 285100019        |
| Emphysema NOS                                                          | 301477019        | 87433001        | 144964015        |
| Chronic obstructive pulmonary disease rescue pack declined             | 2219861000000114 | 857791000000103 | 2219861000000114 |
| Eosinophilic bronchitis                                                | 2240631000000119 | 866901000000103 | 2240631000000119 |
| COPD monitoring invite 1                                               | 940141000006111  | 940141000006107 | 940141000006111  |
| COPD patient unsuitable for pulmonary rehabilitation                   | 1704541000006113 | 371611000000107 | 1152601000000114 |
| Other emphysema                                                        | 301469018        | 87433001        | 144964015        |
| Chronic tracheobronchitis                                              | 87480013         | 52571006        | 87480013         |
| COPD - Chronic obstructive pulmonary disease                           | 2716321000006116 | 13645005        | 475427019        |
| Unilateral emphysema                                                   | 3228301000006115 | 45145000        | 75281018         |

|                                                                                 |                   |                   |                   |
|---------------------------------------------------------------------------------|-------------------|-------------------|-------------------|
| Chronic obstructive airways disease NOS                                         | 12728161000006116 | 611541000000106   | 1352161000000113  |
| Fetid chronic bronchitis                                                        | 139979010         | 84409004          | 506053014         |
| Obstructive chronic bronchitis                                                  | 285104011         | 185086009         | 285100019         |
| Referred for COPD structured smoking assessment                                 | 1704551000006110  | 375851000000108   | 739301000000115   |
| COPD GOLD group B                                                               | 11932341000006113 | 11932341000006109 | 11932341000006113 |
| Chronic obstructive pulmonary disease monitoring in primary care                | 1856491000006119  | 1856491000006103  | 1856491000006119  |
| Chronic obstructive pulmonary disease monitoring secondary care                 | 1856501000006110  | 1856501000006106  | 1856501000006110  |
| Chronic obstructive pulmonary disease multidisciplinary review                  | 1771201000006116  | 1771201000006100  | 1771201000006116  |
| Referral to COPD (chronic obstructive pulmonary disease) community nursing team | 8249051000006111  | 790301000000101   | 1766841000000110  |
| At risk of COPD (chronic obstructive pulmonary disease) exacerbation            | 8125721000006119  | 383611000000102   | 756791000000118   |
| Chronic obstructive pulmonary disease confirmed                                 | 1823851000006119  | 1823851000006103  | 1823851000006119  |
| Acute exacerbation of chronic obstructive pulmonary disease                     | 4781431000006114  | 195951007         | 3012710012        |
| Issue of chronic obstructive pulmonary disease rescue pack                      | 1573111000000115  | 718241000000107   | 1573111000000115  |
| Emergency hospital admission for COPD (chronic obstructive pulmonary disease)   | 6763251000006114  | 408501008         | 3082978011        |
| History of chronic obstructive airway disease                                   | 5516841000006119  | 270473001         | 2986462010        |
| Interstitial emphysema of lung                                                  | 3764021000006117  | 77690003          | 128944012         |
| Chronic obstructive pulmonary disease follow-up assessment                      | 1856591000006115  | 1856591000006104  | 1856591000006115  |
| COPD accident and emergency attendance since last visit                         | 977891000006112   | 413845009         | 2533538014        |
| Multiple COPD emergency hospital admissions                                     | 998281000006115   | 198901000000105   | 300201000000114   |
| Chronic obstructive pulmonary disease monitoring 3rd letter                     | 199481000000116   | 717521000000104   | 1570061000000113  |
| Chronic obst. pulm. dis. NOS                                                    | 990641000006110   | 13645005          | 990641000006110   |
| Number of COPD exacerbations in past year                                       | 977911000006114   | 723245007         | 3335171010        |
| On chronic obstructive pulmonary disease supprt v cre pathway                   | 1813871000006117  | 826111000000109   | 2149041000000110  |
| Other specified chronic obstructive airways disease                             | 301539010         | 13645005          | 475428012         |
| Purulent chronic bronchitis                                                     | 506053014         | 84409004          | 506053014         |
| Chronic obstructive pulmonary disease monitoring                                | 1484924013        | 390891009         | 1484924013        |
| Chronic obstructive pulmonary disease 6 monthly review                          | 1683221000000119  | 760621000000103   | 1683221000000119  |
| Alveolar emphysema of lung                                                      | 2578911000006118  | 4981000           | 9339018           |
| COPD management plan declined                                                   | 1880061000006110  | 1880061000006106  | 1880061000006110  |
| COPD patient unsuitable for pulmonary rehab - enh serv admin                    | 1704531000006115  | 371611000000107   | 1152601000000114  |
| COPD self-management plan agreed                                                | 1811661000006110  | 811961000000106   | 2117851000000118  |
| Admit COPD emergency                                                            | 2160051010        | 408501008         | 3082901016        |
| COPD (chronic obstructive pulmonary disease) self-management plan review        | 8260631000006112  | 810951000000101   | 2115741000000118  |
| Asthma-COPD overlap syndrome (ACOS)                                             | 9317331000006113  | 10692761000119107 | 3046475015        |
| Chronic obstructive pulmonary disease monitor phone invite                      | 967581000006118   | 716901000000101   | 1569451000000115  |
| Optimization of medication for chronic obstructive pulmonary disease            | 7484331000006119  | 473202005         | 2956201010        |

|                                                             |                   |                  |                  |
|-------------------------------------------------------------|-------------------|------------------|------------------|
| Simple chronic bronchitis                                   | 508561017         | 61937009         | 102938011        |
| Other specified chronic obstructive pulmonary disease       | 1222334016        | 13645005         | 475431013        |
| Chronic obstructive pulmonary disease NOS                   | 1222335015        | 13645005         | 475431013        |
| Chronic obstructive pulmonary disease monitoring 2nd letter | 198471000000111   | 717021000000106  | 1569571000000113 |
| Chronic obstructive pulmonary disease NOS                   | 12759361000006112 | 611541000000106  | 1352151000000110 |
| Emphysematous bulla                                         | 4781461000006117  | 195957006        | 301461015        |
| Mucopurulent chronic bronchitis                             | 123588010         | 74417001         | 123588010        |
| GP out of hours notified of COPD care plan                  | 1763751000006117  | 1763751000006101 | 1763751000006117 |
| History of chronic obstructive pulmonary disease            | 1765681000000110  | 270473001        | 1765681000000110 |
| Emphysematous bronchitis                                    | 285100019         | 185086009        | 285100019        |



**Table S53. Diabetic retinopathy Aurum codes**

| Term                                                                         | Medcode ID        | SNOMED CT Concept ID | SNOMED CT Description ID |
|------------------------------------------------------------------------------|-------------------|----------------------|--------------------------|
| Moderate nonproliferative diabetic retinopathy of left eye                   | 12085211000006112 | 769186002            | 3689288014               |
| O/E - sight threatening diabetic retinopathy                                 | 2549896013        | 417677008            | 2549896013               |
| Diabetic retinopathy clinic                                                  | 7567371000006117  | 702850009            | 3006342012               |
| Left proliferative diabetic retinopathy                                      | 856621000006118   | 856621000006102      | 856621000006118          |
| Left non-proliferative diabetic retinopathy                                  | 857031000006113   | 857031000006109      | 857031000006113          |
| Right proliferative diabetic retinopathy                                     | 857411000006110   | 857411000006106      | 857411000006110          |
| Right non-proliferative diabetic retinopathy                                 | 857971000006110   | 857971000006106      | 857971000006110          |
| On examination - right eye background diabetic retinopathy                   | 6761781000006114  | 408409007            | 2621799017               |
| Diabetic retinopathy screening offered                                       | 12121381000006114 | 1103701000000102     | 2763011000000112         |
| Proliferative diabetic retinopathy - high risk                               | 6022721000006112  | 312907002            | 456707011                |
| On examination - right eye preproliferative diabetic retinopathy             | 6761821000006115  | 408411003            | 2621610013               |
| DR - Diabetic retinopathy                                                    | 2576431000006117  | 4855003              | 1230610015               |
| Proliferative diabetic retinopathy                                           | 98476015          | 59276001             | 98476015                 |
| On examination - left eye stable treated proliferative diabetic retinopathy  | 6866541000006117  | 414894003            | 2621811014               |
| Severe NPDR (nonproliferative diabetic retinopathy)                          | 12224761000006115 | 312905005            | 3691865016               |
| High risk proliferative diabetic retinopathy                                 | 1785163015        | 312907002            | 1785163015               |
| O/E - right eye proliferative diabetic retinopathy                           | 2159977011        | 408413000            | 2159977011               |
| O/E - left eye proliferative diabetic retinopathy                            | 2159978018        | 408414006            | 2159978018               |
| Nonproliferative diabetic retinopathy                                        | 6515171000006112  | 390834004            | 2643005014               |
| On examination - right eye stable treated proliferative diabetic retinopathy | 6866901000006111  | 414910007            | 2621810010               |
| Mild nonproliferative diabetic retinopathy                                   | 6022611000006112  | 312903003            | 2921114017               |
| Mild nonproliferative diabetic retinopathy of right eye                      | 12085071000006114 | 769183005            | 3689271019               |
| Preproliferative diabetic retinopathy of left eye                            | 12085051000006116 | 769182000            | 3689267017               |
| Very severe proliferative diabetic retinopathy                               | 6630581000006113  | 399865004            | 1779161016               |
| O/E - left eye stable treated proliferative diabetic retinopathy             | 975261000006113   | 414894003            | 2532964019               |
| Severe nonproliferative diabetic retinopathy of right eye                    | 12085251000006113 | 769187006            | 3689295017               |
| Moderate nonproliferative diabetic retinopathy                               | 6022621000006116  | 312904009            | 1775724010               |
| Proliferative diabetic retinopathy - non high risk                           | 6022671000006115  | 312906006            | 456706019                |
| Left laser treated diabetic retinopathy                                      | 856631000006115   | 856631000006104      | 856631000006115          |
| Left preproliferative diabetic retinopathy                                   | 857051000006118   | 857051000006102      | 857051000006118          |
| Right laser treated diabetic retinopathy                                     | 857421000006119   | 857421000006103      | 857421000006119          |
| Moderate non-proliferative diabetic retinopathy of left eye                  | 12085231000006118 | 769186002            | 3689292019               |
| Mild nonproliferative diabetic retinopathy of left eye                       | 12085121000006114 | 769184004            | 3689282010               |
| Proliferative diabetic retinopathy - quiescent                               | 6022761000006118  | 312908007            | 456708018                |

|                                                                     |                   |                 |                  |
|---------------------------------------------------------------------|-------------------|-----------------|------------------|
| Mild non-proliferative diabetic retinopathy of left eye             | 12085141000006119 | 769184004       | 3689278013       |
| Moderate nonproliferative diabetic retinopathy of right eye         | 12085171000006110 | 769185003       | 3689286013       |
| Severe nonproliferative diabetic retinopathy with no macular oedema | 6630751000006114  | 399873008       | 1773465013       |
| Severe nonproliferative diabetic retinopathy of left eye            | 12085291000006119 | 769188001       | 3689299011       |
| Background diabetic retinopathy                                     | 1785332013        | 390834004       | 1785332013       |
| O/E - right eye background diabetic retinopathy                     | 2159973010        | 408409007       | 2159973010       |
| Diabetic retinopathy 6 month review                                 | 2159949019        | 408385003       | 2159949019       |
| Very severe nonproliferative diabetic retinopathy                   | 6630851000006115  | 399876000       | 1779167017       |
| Impaired vision due to diabetic retinopathy                         | 733161000000116   | 373041000000101 | 733161000000116  |
| On examination - left eye preproliferative diabetic retinopathy     | 6761841000006110  | 408412005       | 2621611012       |
| O/E - right eye stable treated proliferative diabetic retinopathy   | 975251000006111   | 414910007       | 2532963013       |
| On examination - left eye proliferative diabetic retinopathy        | 6761881000006116  | 408414006       | 2621613010       |
| On examination - left eye background diabetic retinopathy           | 6761801000006113  | 408410002       | 2621800018       |
| PPDR - Preproliferative diabetic retinopathy                        | 4771421000006116  | 193349004       | 2579151010       |
| Diabetic retinopathy detected by national screening programme       | 8242331000006114  | 775841000000109 | 1733071000000112 |
| Preproliferative diabetic retinopathy                               | 297754014         | 193349004       | 297754014        |
| Diabetic retinopathy NOS                                            | 297758012         | 4855003         | 9093013          |
| Laser treated diabetic retinopathy                                  | 856611000006114   | 856611000006105 | 856611000006114  |
| O/E - left eye background diabetic retinopathy                      | 2159974016        | 408410002       | 2159974016       |
| O/E - right eye preproliferative diabetic retinopathy               | 2159975015        | 408411003       | 2159975015       |
| NPDR - Non proliferative diabetic retinopathy                       | 6515201000006111  | 390834004       | 2579521014       |
| BDR - Background diabetic retinopathy                               | 6515211000006114  | 390834004       | 2621399015       |
| Moderate non-proliferative diabetic retinopathy of right eye        | 12085181000006113 | 769185003       | 3689284011       |
| Early proliferative diabetic retinopathy                            | 6022691000006119  | 312906006       | 1785158019       |
| Right preproliferative diabetic retinopathy                         | 857981000006113   | 857981000006109 | 857981000006113  |
| Non proliferative diabetic retinopathy                              | 1484867016        | 390834004       | 1484867016       |
| Diabetic retinopathy 12 month review                                | 2159948010        | 408384004       | 2159948010       |
| O/E - left eye preproliferative diabetic retinopathy                | 2159976019        | 408412005       | 2159976019       |
| Mild non-proliferative diabetic retinopathy of right eye            | 12085091000006110 | 769183005       | 3689273016       |
| Mild non-proliferative diabetic retinopathy                         | 6022581000006116  | 312903003       | 2642672017       |
| PDR - proliferative diabetic retinopathy                            | 12189891000006110 | 59276001        | 3699415016       |
| On examination - right eye proliferative diabetic retinopathy       | 6761861000006114  | 408413000       | 2621612017       |
| Preproliferative diabetic retinopathy of right eye                  | 12085021000006113 | 769181007       | 3689265013       |
| Severe nonproliferative diabetic retinopathy                        | 841011000006112   | 312905005       | 1775725011       |
| Moderate non-proliferative diabetic retinopathy                     | 12224731000006112 | 312904009       | 3688869017       |
| Diabetic retinopathy                                                | 9093013           | 4855003         | 9093013          |

**Table S54. Retinal vascular occlusion Aurum codes**

| Term                                                          | Medcode ID       | SNOMED CT Concept ID | SNOMED CT Description ID |
|---------------------------------------------------------------|------------------|----------------------|--------------------------|
| BRVO - Branch retinal vein occlusion                          | 2892671000006112 | 24596005             | 481962015                |
| Branch retinal vein occlusion                                 | 481961010        | 24596005             | 481961010                |
| Central retinal vein occlusion with macular oedema            | 5031001000006113 | 232039004            | 347681015                |
| Central retinal artery occlusion                              | 64469014         | 38742007             | 64469014                 |
| Central retinal vein occlusion                                | 113737013        | 68478007             | 113737013                |
| BRAO - Branch retinal artery occlusion                        | 3323131000006114 | 50821009             | 1230907012               |
| Branch retinal vein occlusion with macular oedema             | 5031181000006115 | 232048009            | 347698015                |
| Hemicentral retinal vein occlusion                            | 5031091000006118 | 232043000            | 2619565019               |
| Central retinal vein occlusion - juvenile with macular oedema | 5031061000006114 | 232042005            | 347686013                |
| Cilioretinal artery occlusion                                 | 5030961000006116 | 232036006            | 347676012                |
| Hemispheric retinal vein occlusion with macular oedema        | 5031131000006116 | 232045007            | 347692019                |
| Branch retinal artery occlusion                               | 1230906015       | 50821009             | 1230906015               |
| Central retinal vein occlusion - ischaemic                    | 6024101000006114 | 312997008            | 456819013                |
| Central retinal vein occlusion - non-ischaemic                | 6024121000006116 | 312998003            | 456822010                |
| Central retinal vein occlusion with neovascularisation        | 5030981000006114 | 232038007            | 347678013                |
| Macular branch retinal vein occlusion                         | 5239581000006115 | 247121001            | 369049012                |
| Branch retinal vein occlusion with no neovascularisation      | 6041221000006114 | 314000002            | 458269018                |
| Central retinal vein occlusion - ischemic                     | 6024111000006112 | 312997008            | 456820019                |
| Retinal artery occlusion                                      | 299476010        | 232035005            | 347674010                |
| Retinal vein occlusion                                        | 3244281000006112 | 46085004             | 494432015                |
| Hemispheric retinal vein occlusion                            | 5031081000006116 | 232043000            | 347688014                |
| CRAO - Central retinal artery occlusion                       | 3123581000006112 | 38742007             | 1229456016               |
| CRVO - Central retinal vein occlusion                         | 3614321000006112 | 68478007             | 501027019                |

**Table S55. Glaucoma Aurum codes**

| Term                                                       | Medcode ID       | SNOMED CT Concept ID | SNOMED CT Description ID |
|------------------------------------------------------------|------------------|----------------------|--------------------------|
| COAG - Chronic open-angle glaucoma                         | 3753261000006114 | 77075001             | 503455016                |
| Secondary angle-closure glaucoma with pupil block          | 4772381000006115 | 193561006            | 298063016                |
| Primary angle-closure glaucoma residual stage              | 298048019        | 193546005            | 298048019                |
| Steroid-induced glaucoma glaucomatous stage                | 298050010        | 193548006            | 298050010                |
| Glaucoma due to ocular cyst                                | 411465018        | 275477002            | 411465018                |
| Chronic angle-closure glaucoma                             | 3041311000006118 | 33647009             | 485587011                |
| Secondary glaucoma                                         | 298053012        | 95717004             | 158563019                |
| Family history: Glaucoma                                   | 4530051000006112 | 160347007            | 2666122010               |
| Glaucoma associated with ocular trauma                     | 3610251000006115 | 68241007             | 113353013                |
| Borderline glaucoma NOS                                    | 298033013        | 193531003            | 298024011                |
| Open-angle glaucoma NOS                                    | 298042018        | 84494001             | 140102012                |
| Unspecified primary angle-closure glaucoma                 | 298047012        | 392288006            | 1486268015               |
| Primary angle-closure glaucoma NOS                         | 298049010        | 392288006            | 1486268015               |
| Glaucoma associated with other ocular disorders            | 298061019        | 95717004             | 158563019                |
| Other specified forms of glaucoma                          | 298072012        | 23986001             | 40268016                 |
| Other specified glaucoma NOS                               | 298074013        | 23986001             | 40268016                 |
| [X]Other glaucoma                                          | 299482013        | 23986001             | 40268016                 |
| Congenital glaucoma                                        | 582671000006113  | 204113001            | 312991013                |
| Glaucomatous atrophy of optic disc                         | 2517641000006119 | 1207009              | 3144014                  |
| Simple chronic glaucoma                                    | 141721000006112  | 77075001             | 503452018                |
| Corticosteroid-induced glaucoma                            | 2524871000006112 | 1654001              | 3874015                  |
| Adverse reaction to Drugs Used For Glaucoma                | 1010721000006116 | 1010721000006100     | 1010721000006116         |
| Secondary open-angle glaucoma with pigment dispersion      | 3245761000006114 | 46168003             | 494450010                |
| Phacomorphic glaucoma                                      | 6532921000006114 | 392300000            | 1486280011               |
| Neovascular glaucoma                                       | 347755010        | 232086000            | 347755010                |
| Primary angle-closure glaucoma                             | 1486268015       | 392288006            | 1486268015               |
| Phacolytic glaucoma                                        | 54899010         | 32893002             | 54899010                 |
| Pigmentary glaucoma                                        | 76978010         | 46168003             | 76978010                 |
| Low tension glaucoma                                       | 84105018         | 50485007             | 84105018                 |
| Glaucoma due to ocular inflammation                        | 803011000006118  | 37155002             | 486637019                |
| Intermittent angle-closure glaucoma                        | 3564451000006117 | 65460003             | 108757016                |
| Needling of bleb following glaucoma surgery                | 383421000000110  | 236891000000101      | 383421000000110          |
| Chronic angle closure glaucoma                             | 6050201000006111 | 314784002            | 1490667012               |
| [X]Glaucoma in endocrine,nutritional+metabolic diseases CE | 388101000006114  | 193556009            | 298058015                |
| Family history of glaucoma                                 | 4530041000006110 | 160347007            | 249916014                |
| Phacogenic glaucoma                                        | 3872051000006113 | 84333006             | 1490002015               |
| Chronic narrow angle glaucoma                              | 3041351000006117 | 33647009             | 485589014                |
| Revision of bleb NEC following glaucoma surgery            | 378061000000112  | 236891000000101      | 383421000000110          |
| Other specified operations following glaucoma surgery      | 378721000000118  | 792741000000100      | 1772301000000112         |

|                                                                                      |                  |                   |            |
|--------------------------------------------------------------------------------------|------------------|-------------------|------------|
| [X]Glaucoma                                                                          | 388091000006115  | 23986001          | 40268016   |
| Glaucoma due to ocular tumour or cyst                                                | 399447011        | 267625001         | 399447011  |
| Pseudoexfoliation glaucoma                                                           | 178757012        | 111514006         | 178757012  |
| Narrow-angle glaucoma                                                                | 6532591000006118 | 392291006         | 2647495010 |
| Glaucoma screening                                                                   | 803131000006113  | 171215009         | 265311011  |
| Steroid-induced glaucoma NOS                                                         | 298052019        | 1654001           | 3874015    |
| Glaucoma associated with other ocular disorders NOS                                  | 298071017        | 95717004          | 158563019  |
| Glaucoma drainage surgery                                                            | 6353481000006112 | 371370007         | 2476699016 |
| Glaucoma due to combination of mechanisms                                            | 4010061000006117 | 92829008          | 153471016  |
| Open angle glaucoma                                                                  | 3874601000006113 | 84494001          | 2579462017 |
| Bilateral angle-closure glaucoma                                                     | 9846871000006112 | 15736721000119106 | 3373331019 |
| Injection of filtering bleb following glaucoma surgery                               | 7089401000006110 | 428494000         | 2694522012 |
| Glaucoma due to another disorder                                                     | 299484014        | 95717004          | 158563019  |
| Aphakic glaucoma                                                                     | 2743971000006118 | 15374009          | 26072012   |
| Subcapsular glaucomatous flecks                                                      | 3601481000006119 | 67733005          | 112484015  |
| Subacute closed-angle glaucoma                                                       | 3564481000006113 | 65460003          | 1232678013 |
| Acute angle-closure glaucoma of right eye                                            | 8107961000006110 | 336611000119109   | 3316703019 |
| Glaucoma associated with disorders of the lens                                       | 802911000006110  | 84333006          | 1234928013 |
| Wide-angle glaucoma                                                                  | 3874591000006117 | 84494001          | 140106010  |
| Glaucoma due to other anterior segment anomaly                                       | 298056016        | 95717004          | 158563019  |
| Glaucoma NOS                                                                         | 298075014        | 23986001          | 40268016   |
| Secondary open-angle glaucoma                                                        | 2848811000006113 | 21928008          | 36783018   |
| Glaucoma due to episode of increased venous pressure                                 | 802981000006115  | 34623005          | 1228189019 |
| Glaucoma due to pupillary block                                                      | 803061000006115  | 193561006         | 298063016  |
| Steroid-induced glaucoma residual stage                                              | 298051014        | 193549003         | 298051014  |
| Glaucoma with lens disorder                                                          | 3872071000006115 | 84333006          | 1234928013 |
| Uveitic glaucoma                                                                     | 6041601000006118 | 314033007         | 458309018  |
| Glaucoma surgery                                                                     | 3899381000006119 | 86077009          | 2621280010 |
| Glaucoma suspect                                                                     | 5031661000006115 | 232079008         | 347743016  |
| Steroid-induced glaucoma                                                             | 1221368012       | 1654001           | 1221368012 |
| Glaucomatous subcapsular flecks                                                      | 1232965011       | 67733005          | 1232965011 |
| Suspected angle-closure glaucoma                                                     | 7629711000006119 | 708176002         | 3042911012 |
| Glaucoma following surgery                                                           | 5031801000006115 | 232090003         | 347762018  |
| Mixed mechanism glaucoma                                                             | 4010091000006113 | 92829008          | 2770265014 |
| Suspected glaucoma of bilateral eyes caused by steroids                              | 9351591000006115 | 11001071000119105 | 3326549013 |
| Chronic closed-angle glaucoma                                                        | 556201000006114  | 33647009          | 485588018  |
| Cupping of optic discs of bilateral eyes co-occurrent and due to open-angle glaucoma | 3526208016       | 737006004         | 3526208016 |
| Bilateral absolute glaucoma                                                          | 8111981000006112 | 347401000119106   | 3316706010 |
| No family history of glaucoma                                                        | 4528321000006118 | 160267000         | 249716018  |
| Borderline glaucoma steroid responder                                                | 1490617017       | 302895007         | 1490617017 |

|                                                           |                  |                   |                  |
|-----------------------------------------------------------|------------------|-------------------|------------------|
| ACG - Angle closure glaucoma                              | 6532581000006116 | 392291006         | 2621430019       |
| Residual stage of open angle glaucoma                     | 47081000006113   | 66990007          | 111276019        |
| Secondary/other glaucoma                                  | 883301000006118  | 660261000000103   | 883301000006118  |
| Angle-closure glaucoma of both eyes                       | 9846911000006110 | 15736721000119106 | 3373334010       |
| Angle-closure glaucoma                                    | 6532571000006119 | 392291006         | 1486271011       |
| Glaucoma right eye                                        | 856591000006115  | 856591000006104   | 856591000006115  |
| Glaucoma left eye                                         | 856601000006111  | 856601000006107   | 856601000006111  |
| Borderline glaucoma                                       | 298024011        | 193531003         | 298024011        |
| Glaucoma due to chamber angle anomaly                     | 298054018        | 193552006         | 298054018        |
| Glaucoma due to iris anomaly                              | 298055017        | 193553001         | 298055017        |
| Operation following glaucoma surgery                      | 361511000000118  | 792741000000100   | 1772301000000112 |
| Glaucoma caused by silicone oil                           | 7727931000006113 | 715144004         | 3301594012       |
| Primary open angle glaucoma                               | 3753211000006111 | 77075001          | 127956010        |
| Secondary open-angle glaucoma with pseudoexfoliation      | 4196741000006113 | 111514006         | 1219666018       |
| Secondary angle-closure glaucoma                          | 2843081000006117 | 21571006          | 36185019         |
| Closed angle glaucoma                                     | 560611000006117  | 392288006         | 1486268015       |
| Newborn glaucoma                                          | 674741000006115  | 204113001         | 312991013        |
| Narrow angle glaucoma                                     | 6532601000006114 | 392291006         | 2647496011       |
| Glaucoma tube shunt                                       | 5484711000006110 | 265291005         | 2551168012       |
| Absolute glaucoma                                         | 802901000006112  | 19144002          | 32262013         |
| Glaucoma due to disease NOS                               | 298059011        | 95717004          | 158563019        |
| Operations following glaucoma surgery NOS                 | 383401000000118  | 792741000000100   | 1772301000000112 |
| Removal of releasable suture following glaucoma surgery   | 2676361011       | 426877004         | 2676361011       |
| Glaucoma associated with disorders of the lens NOS        | 298060018        | 84333006          | 139867011        |
| Needling of bleb following glaucoma surgery               | 7089411000006113 | 428494000         | 3032787012       |
| Acute-on-chronic glaucoma                                 | 6041451000006116 | 314017009         | 458290014        |
| Angle-closure glaucoma - borderline                       | 521031000006117  | 193534006         | 298027016        |
| Glaucoma monitoring                                       | 264949013        | 170946006         | 264949013        |
| Unspecified open-angle glaucoma                           | 298034019        | 84494001          | 140102012        |
| Glaucoma due to unspecified ocular disorder               | 298062014        | 95717004          | 158563019        |
| Glaucomatous optic atrophy                                | 2517661000006115 | 1207009           | 1220515013       |
| Primary closed-angle glaucoma                             | 883291000006119  | 392288006         | 883291000006119  |
| At risk of glaucoma                                       | 1697781000006112 | 314018004         | 458291013        |
| Injection of bleb following glaucoma surgery              | 383381000000118  | 428494000         | 1659491000000113 |
| Traumatic glaucoma                                        | 3610261000006118 | 68241007          | 1233025018       |
| Chronic simple glaucoma                                   | 3753221000006115 | 77075001          | 127957018        |
| Glaucomatocyclitic crisis                                 | 2974881000006116 | 29538005          | 49421018         |
| Glaucoma due to systemic syndrome                         | 298057013        | 193555008         | 298057013        |
| Glaucoma in endocrine, nutritional and metabolic diseases | 298058015        | 193556009         | 298058015        |
| Open-angle glaucoma                                       | 140102012        | 84494001          | 140102012        |
| Narrow angle glaucoma of bilateral eyes                   | 9846901000006112 | 15736721000119106 | 3373333016       |

|                                                                   |                   |                   |                  |
|-------------------------------------------------------------------|-------------------|-------------------|------------------|
| Glaucoma surgery                                                  | 6979851000006114  | 421885009         | 2618478010       |
| Glaucoma                                                          | 40268016          | 23986001          | 40268016         |
| Hypersecretion glaucoma                                           | 49139016          | 29369005          | 49139016         |
| Primary congenital glaucoma                                       | 6871531000006110  | 415176004         | 2535441016       |
| Laser suture lysis following glaucoma surgery                     | 378701000000110   | 234611000000100   | 378701000000110  |
| Suspected glaucoma                                                | 558691000000111   | 232079008         | 2408401000000115 |
| Advanced open-angle glaucoma                                      | 4196691000006111  | 111513000         | 178756015        |
| Panretinal photocoagulation for glaucoma                          | 249331000006112   | 172586003         | 267176015        |
| CSG - Chronic simple glaucoma                                     | 3753251000006112  | 77075001          | 503454017        |
| POAG - Primary open-angle glaucoma                                | 3753241000006110  | 77075001          | 503453011        |
| Low tension glaucoma                                              | 734071000006115   | 50485007          | 84105018         |
| Suspected glaucoma                                                | 1629641000006111  | 1629641000006107  | 1629641000006111 |
| Glaucoma implant surgery                                          | 5484721000006119  | 265291005         | 2883614019       |
| CNAG - Chronic narrow angle glaucoma                              | 3041361000006115  | 33647009          | 2620650018       |
| Referral to glaucoma clinic                                       | 2533408017        | 415273001         | 2533408017       |
| [V]Screening for glaucoma                                         | 461299019         | 171215009         | 265311011        |
| Bilateral narrow angle glaucoma                                   | 9846881000006110  | 15736721000119106 | 3373330018       |
| Unspecified preglaucoma                                           | 298025012         | 23986001          | 40268016         |
| Primary open-angle glaucoma                                       | 503452018         | 77075001          | 503452018        |
| Optic disc glaucomatous atrophy                                   | 1220514012        | 1207009           | 1220514012       |
| Glaucoma due to ocular trauma                                     | 1233026017        | 68241007          | 1233026017       |
| Open-angle glaucoma - borderline                                  | 264071000006115   | 193533000         | 298026013        |
| Acute closed-angle glaucoma                                       | 459721000006110   | 30041005          | 1226810019       |
| No evidence of glaucoma                                           | 12624091000006111 | 1109141000000102  | 2775491000000119 |
| Acute angle-closure glaucoma                                      | 2983571000006113  | 30041005          | 50268012         |
| Normal pressure glaucoma                                          | 495680018         | 50485007          | 495680018        |
| AACG - Acute angle closure glaucoma                               | 2983591000006114  | 30041005          | 2620418016       |
| Glaucoma micro-stent                                              | 3532561018        | 738510009         | 3532561018       |
| Glaucomatocyclitic crises                                         | 1226368013        | 29538005          | 1226368013       |
| Glaucoma with ocular inflammation                                 | 3098461000006112  | 37155002          | 486637019        |
| Angle recession glaucoma                                          | 6535011000006114  | 392352004         | 1486331015       |
| [RFC] Glaucoma                                                    | 907841000006110   | 907841000006106   | 907841000006110  |
| Intermittent primary angle-closure glaucoma                       | 770481000006118   | 65460003          | 1232679017       |
| Cupping of optic disc co-occurrent and due to open angle glaucoma | 3526206017        | 736838001         | 3526206017       |
| Glaucoma due to ocular vascular disorder                          | 298064010         | 193562004         | 298064010        |
| H/O: glaucoma                                                     | 251653013         | 161488001         | 251653013        |
| Normal tension glaucoma                                           | 3317631000006118  | 50485007          | 495682014        |
| Open angle glaucoma suspect                                       | 14154791000006118 |                   |                  |
| Angle closure glaucoma suspect                                    | 14153851000006115 |                   |                  |
| Glaucoma suspect                                                  | 13933811000006119 |                   |                  |

**Table S56. Age-related macular degeneration Aurum codes**

| Term                                          | Medcode ID        | SNOMED CT<br>Concept ID | SNOMED CT<br>Description ID |
|-----------------------------------------------|-------------------|-------------------------|-----------------------------|
| Myopic macular degeneration                   | 6022521000006115  | 312898002               | 456698016                   |
| Drusen stage macular degeneration             | 5478331000006117  | 264633009               | 393115018                   |
| Disciform macular degeneration                | 6853451000006118  | 414173003               | 2538082010                  |
| Atrophic age-related macular degeneration     | 6866121000006116  | 414875008               | 2537363011                  |
| Senile macular degeneration                   | 399676018         | 267718000               | 399676018                   |
| EMD - Exudative macular degeneration          | 6853541000006119  | 414173003               | 2621806012                  |
| Age related macular degeneration              | 78571000006118    | 267718000               | 399670012                   |
| AAMD - Age related macular degeneration       | 5501831000006117  | 267718000               | 2620215016                  |
| Neovascular age-related macular degeneration  | 6853501000006116  | 414173003               | 2538087016                  |
| ARMD - Age-related macular degeneration       | 5501781000006114  | 267718000               | 399672016                   |
| Dry senile macular degeneration               | 2537365016        | 414875008               | 2537365016                  |
| Wet senile macular degeneration               | 2538088014        | 414173003               | 2538088014                  |
| AMD - Age-related macular degeneration        | 5501811000006111  | 267718000               | 399675019                   |
| Nonexudative age-related macular degeneration | 6866111000006112  | 414875008               | 2534426012                  |
| Exudative age-related macular degeneration    | 6853441000006115  | 414173003               | 2535500012                  |
| Age-related macular degeneration              | 5501771000006111  | 267718000               | 399671011                   |
| Disciform macular degeneration                | 14198731000006115 |                         |                             |



**Table S57. Retinal Laser Aurum codes**

| Term                                                         | Medcode ID       | SNOMED CT<br>Concept ID | SNOMED CT<br>Description ID |
|--------------------------------------------------------------|------------------|-------------------------|-----------------------------|
| Panretinal laser photocoagulation to lesion of retina<br>NEC | 361631000000110  | 283851000000107         | 489321000000113             |
| Panretinal laser photocoagulation                            | 6020151000006115 | 312713003               | 1785150014                  |
| Retinal laser photocoagulation                               | 6630611000006117 | 399867007               | 1787015019                  |
| Focal retinal laser photocoagulation                         | 6588671000006112 | 397538008               | 1785845018                  |
| Panretinal laser photocoagulation to lesion of retina        | 489321000000113  | 283851000000107         | 489321000000113             |
| O/E - No retinal laser photocoagulation scars                | 2534106015       | 414902006               | 2534106015                  |
| Scatter retinal laser photocoagulation                       | 6020161000006118 | 312713003               | 2536171014                  |
| Retinal laser therapy                                        | 262909018        | 169425004               | 262911010                   |

**Table S58. Vitrectomy Aurum codes**

| Term                                         | Medcode ID       | SNOMED CT<br>Concept ID | SNOMED CT<br>Description ID |
|----------------------------------------------|------------------|-------------------------|-----------------------------|
| Mechanical vitrectomy by pars plana approach | 3914871000006116 | 87021001                | 144315019                   |
| Pars plana vitrectomy                        | 507373018        | 87021001                | 507373018                   |
| Vitrectomy                                   | 3731361000006116 | 75732000                | 125783018                   |
| Anterior vitrectomy                          | 267129012        | 172555009               | 267129012                   |
| Vitrectomy using pars plana approach         | 465551000000114  | 87021001                | 465551000000114             |
| PPV - Pars plana vitrectomy                  | 3914891000006115 | 87021001                | 507374012                   |
| Anterior vitrectomy                          | 486601000006113  | 172555009               | 267129012                   |
| Vitrectomy by anterior approach              | 1541981000006119 | 172555009               | 267130019                   |
| Phacoemulsification/vitrectomy system        | 7406901000006117 | 462940007               | 2944713011                  |

**Table S59. Scleral buckle Aurum codes**

| Term                        | Medcode ID       | SNOMED CT<br>Concept ID | SNOMED CT<br>Description ID |
|-----------------------------|------------------|-------------------------|-----------------------------|
| Scleral buckle              | 6346771000006113 | 370944007               | 2673018011                  |
| Removal of scleral buckle   | 6353851000006118 | 371394007               | 1210056018                  |
| Extrusion of scleral buckle | 6516171000006117 | 390909000               | 1484941010                  |
| Scleral buckle procedure    | 2929071000006111 | 26786002                | 2162369019                  |

**Table S60. Intravitreal injection Aurum codes**

| Term                                                                | Medcode ID       | SNOMED CT<br>Concept ID | SNOMED CT<br>Description ID |
|---------------------------------------------------------------------|------------------|-------------------------|-----------------------------|
| Ranibizumab 10mg/mL solution for intravitreal injection 0.05mL vial | 7021931000006119 | 424204000               | 2645710015                  |
| Intravitreal injection                                              | 8255441000006119 | 800481000000101         | 1789871000000114            |

**Table S61. Antiplatelet Aurum product codes**

| Term from EMIS                                                                    | Prod code ID     | dmd ID            | Drug substance name                                       |
|-----------------------------------------------------------------------------------|------------------|-------------------|-----------------------------------------------------------|
| Angettes 75 tablets (Bristol-Myers Squibb Pharmaceuticals Ltd)                    | 71241000033119   | 800511000001106   | Aspirin                                                   |
| Aspirin 300mg dispersible tablets                                                 | 82841000033117   | 39695211000001102 | Aspirin                                                   |
| Aspirin 75mg dispersible tablets                                                  | 82941000033113   | 319773006         | Aspirin                                                   |
| Aspirin 75mg gastro-resistant tablets                                             | 83041000033115   | 319781007         | Aspirin                                                   |
| Aspirin 300mg gastro-resistant tablets                                            | 83141000033116   | 322225002         | Aspirin                                                   |
| Aspirin 300mg modified-release tablets                                            | 84441000033114   | 4558011000001103  | Aspirin                                                   |
| Aspirin 300mg tablets                                                             | 86641000033119   | 329525004         | Aspirin                                                   |
| Aspav dispersible tablets (Actavis UK Ltd)                                        | 86841000033118   | 3690911000001103  | Aspirin/<br>Papaveretum                                   |
| Aspirin 75mg tablets                                                              | 87041000033110   | 319775004         | Aspirin                                                   |
| Caprin 75mg gastro-resistant tablets (Wockhardt UK Ltd)                           | 189841000033119  | 927411000001108   | Aspirin                                                   |
| Caprin 300mg gastro-resistant tablets (Pinewood Healthcare)                       | 212341000033117  | 901211000001107   | Aspirin                                                   |
| Co-codaprin 8mg/400mg tablets                                                     | 370941000033119  | 11762111000001100 | Aspirin/ Codeine<br>phosphate                             |
| Co-codaprin 8mg/400mg dispersible tablets                                         | 371041000033112  | 39695111000001108 | Aspirin/ Codeine<br>phosphate                             |
| Disprin CV 300mg modified-release tablets (Reckitt Benckiser Healthcare (UK) Ltd) | 452541000033115  | 4532311000001104  | Aspirin                                                   |
| Nu-Seals 75 gastro-resistant tablets (Alliance Pharmaceuticals Ltd)               | 991441000033115  | 414311000001102   | Aspirin                                                   |
| Nu-Seals 300 gastro-resistant tablets (Alliance Pharmaceuticals Ltd)              | 993341000033113  | 183311000001101   | Aspirin                                                   |
| PostMI 75 dispersible tablets (Ashbourne Pharmaceuticals Ltd)                     | 1098041000033111 | 636011000001100   | Aspirin                                                   |
| PostMI 75 EC tablets (Ashbourne Pharmaceuticals Ltd)                              | 1101541000033119 | 38411000001101    | Aspirin                                                   |
| Asasantin Retard capsules (Boehringer Ingelheim Ltd)                              | 1571541000033117 | 3292511000001108  | Aspirin/<br>Dipyridamole                                  |
| Enprin 75mg gastro-resistant tablets (Galpharm International Ltd)                 | 1729141000033110 | 473711000001109   | Aspirin                                                   |
| Imazin XL tablets (Napp Pharmaceuticals Ltd)                                      | 1739541000033116 | 3460911000001104  | Aspirin/<br>Isosorbide<br>mononitrate                     |
| Imazin XL forte tablets (Napp Pharmaceuticals Ltd)                                | 1739641000033115 | 3461511000001104  | Aspirin/<br>Isosorbide<br>mononitrate                     |
| Aspirin 300mg suppositories                                                       | 2013341000033115 | 322232006         | Aspirin                                                   |
| Aspirin 150mg suppositories                                                       | 2013441000033114 | 322233001         | Aspirin                                                   |
| Aspirin powder                                                                    | 2085241000033111 | 5145711000001107  | Aspirin                                                   |
| MigraMax oral powder sachets (Zentiva Pharma UK Ltd)                              | 2086841000033117 | 3637911000001108  | Aspirin DL-<br>Lysine/<br>Metoclopramide<br>hydrochloride |
| Micropirin 75mg gastro-resistant tablets (Dexcel-Pharma Ltd)                      | 2273741000033118 | 281311000001104   | Aspirin                                                   |
| Dipyridamole 200mg modified-release / Aspirin 25mg capsules                       | 3160741000033110 | 36069911000001109 | Aspirin/<br>Dipyridamole                                  |
| Aspirin 75mg / Isosorbide mononitrate 60mg modified-release tablets               | 3162041000033113 | 35903111000001101 | Aspirin/<br>Isosorbide<br>mononitrate                     |

|                                                                                |                   |                   |                                                           |
|--------------------------------------------------------------------------------|-------------------|-------------------|-----------------------------------------------------------|
| Aspirin 150mg / Isosorbide mononitrate 60mg modified-release tablets           | 3162141000033112  | 35903011000001102 | Aspirin/<br>Isosorbide<br>mononitrate                     |
| Aspirin 900mg / Metoclopramide 10mg oral powder sachets sugar free             | 3836841000033119  | 322784004         | Aspirin DL-<br>Lysine/<br>Metoclopramide<br>hydrochloride |
| Aspirin 500mg / Papaveretum 7.71mg dispersible tablets sugar free              | 3849841000033110  | 39695311000001105 | Aspirin/<br>Papaveretum                                   |
| Aspirin 500mg / Codeine 8mg dispersible tablets sugar free                     | 3934341000033112  | 4956111000001107  | Aspirin/ Codeine<br>phosphate                             |
| Codis 500 dispersible tablets (Reckitt Benckiser Healthcare (UK) Ltd)          | 3934441000033118  | 4951811000001105  | Aspirin/ Codeine<br>phosphate                             |
| Aspro Clear 300mg effervescent tablets (Bayer Plc)                             | 4431841000033118  | 4649111000001101  | Aspirin                                                   |
| Maximum Strength Aspro Clear 500mg effervescent tablets (Bayer Plc)            | 4431941000033114  | 4648711000001109  | Aspirin                                                   |
| Molita 200mg/25mg modified-release capsules (Dr Reddy's Laboratories (UK) Ltd) | 8619141000033116  | 23241511000001106 | Aspirin/<br>Dipyridamole                                  |
| Bisoprolol 5mg / Aspirin 75mg capsules                                         | 10024941000033116 | 28365711000001103 | Aspirin/<br>Bisoprolol<br>fumarate                        |
| Bisoprolol 5mg / Aspirin 100mg capsules                                        | 10025041000033116 | 28365611000001107 | Aspirin/<br>Bisoprolol<br>fumarate                        |
| Bisoprolol 10mg / Aspirin 100mg capsules                                       | 10025241000033112 | 28365311000001102 | Aspirin/<br>Bisoprolol<br>fumarate                        |
| Danamep 75mg dispersible tablets (Ecogen Europe Ltd)                           | 11716941000033112 | 32968711000001107 | Aspirin                                                   |
| Clopidogrel 75mg tablets                                                       | 1583541000033113  | 39689111000001106 | Clopidogrel                                               |
| Plavix 75mg tablets (Sanofi)                                                   | 1667041000033119  | 454611000001104   | Clopidogrel                                               |
| Clopidogrel 300mg tablets                                                      | 4519641000033119  | 429540001         | Clopidogrel<br>hydrogen sulfate                           |
| Plavix 300mg tablets (Sanofi)                                                  | 4519741000033111  | 13663511000001101 | Clopidogrel<br>hydrogen sulfate                           |
| Grepid 75mg tablets (Kent Pharma (UK) Ltd)                                     | 5242341000033112  | 15907411000001101 | Clopidogrel                                               |
| Clopidogrel 75mg/5ml oral suspension                                           | 6122841000033118  | 8426611000001103  | Clopidogrel<br>hydrogen sulfate                           |
| Clopidogrel 1mg/ml oral suspension                                             | 8031441000033112  | 18747911000001101 | Clopidogrel<br>hydrogen sulfate                           |
| Clopidogrel 4mg oral powder sachets                                            | 8300741000033118  | 22342711000001109 | Clopidogrel<br>hydrogen sulfate                           |
| Clopidogrel 75mg/5ml oral solution                                             | 8301241000033117  | 22402511000001104 | Clopidogrel<br>hydrogen sulfate                           |
| Clopidogrel 25mg/5ml oral suspension                                           | 13283841000033111 | 16072911000001108 | Clopidogrel<br>hydrogen sulfate                           |
| Ticagrelor 90mg tablets                                                        | 6059341000033111  | 704465002         | Ticagrelor                                                |
| Brilique 90mg tablets (AstraZeneca UK Ltd)                                     | 6059441000033117  | 18290311000001104 | Ticagrelor                                                |
| Ticagrelor 60mg tablets                                                        | 11422441000033119 | 32472211000001106 | Ticagrelor                                                |
| Brilique 60mg tablets (AstraZeneca UK Ltd)                                     | 11422741000033114 | 32447511000001106 | Ticagrelor                                                |
| Ticagrelor 90mg orodispersible tablets sugar free                              | 12371041000033112 | 34713411000001108 | Ticagrelor                                                |
| Brilique 90mg orodispersible tablets (AstraZeneca UK Ltd)                      | 12371141000033111 | 34672011000001105 | Ticagrelor                                                |
| Dipyridamole 10mg/2ml solution for injection ampoules                          | 447141000033112   | 36069811000001104 | Dipyridamole                                              |
| Dipyridamole 200mg modified-release capsules                                   | 454141000033119   | 39020811000001108 | Dipyridamole                                              |
| Dipyridamole 100mg tablets                                                     | 469641000033119   | 319759002         | Dipyridamole                                              |

|                                                                               |                   |                   |              |
|-------------------------------------------------------------------------------|-------------------|-------------------|--------------|
| Dipyridamole 25mg tablets                                                     | 469741000033111   | 319758005         | Dipyridamole |
| Persantin 10mg/2ml solution for injection ampoules (Boehringer Ingelheim Ltd) | 1052141000033119  | 642111000001104   | Dipyridamole |
| Persantin Retard 200mg capsules (Boehringer Ingelheim Ltd)                    | 1054941000033114  | 452911000001101   | Dipyridamole |
| Persantin 100mg tablets (Boehringer Ingelheim Ltd)                            | 1065441000033113  | 623011000001106   | Dipyridamole |
| Persantin 25mg tablets (Boehringer Ingelheim Ltd)                             | 1065541000033114  | 635611000001102   | Dipyridamole |
| Dipyridamole 50mg/5ml oral suspension sugar free                              | 1728341000033118  | 36070011000001108 | Dipyridamole |
| Dipyridamole 200mg/5ml oral suspension                                        | 5020341000033117  | 8456311000001107  | Dipyridamole |
| Dipyridamole 100mg/5ml oral suspension                                        | 5052341000033115  | 8456511000001101  | Dipyridamole |
| Dipyridamole 250mg/5ml oral solution                                          | 5401541000033119  | 8456211000001104  | Dipyridamole |
| Dipyridamole 100mg/5ml oral solution                                          | 5889941000033115  | 8456611000001102  | Dipyridamole |
| Dipyridamole 200mg/5ml oral solution                                          | 5992041000033118  | 8456411000001100  | Dipyridamole |
| Attia 200mg modified-release capsules (Dr Reddy's Laboratories (UK) Ltd)      | 9165341000033117  | 24435511000001109 | Dipyridamole |
| Ofcram PR 200mg capsules (Advanz Pharma)                                      | 10333041000033118 | 26779011000001104 | Dipyridamole |
| Dipyridamole 200mg/5ml oral suspension sugar free                             | 11072641000033113 | 31948811000001109 | Dipyridamole |
| Trolactin 200mg modified-release capsules (Actavis UK Ltd)                    | 12195441000033115 | 34175911000001100 | Dipyridamole |
| Prasugrel 5mg tablets                                                         | 4956441000033110  | 39702911000001108 | Prasugrel    |
| Prasugrel 10mg tablets                                                        | 4956541000033111  | 39702811000001103 | Prasugrel    |
| Efient 5mg tablets (Daiichi Sankyo UK Ltd)                                    | 4956641000033112  | 15241111000001105 | Prasugrel    |
| Efient 10mg tablets (Daiichi Sankyo UK Ltd)                                   | 4956741000033115  | 15240211000001105 | Prasugrel    |

**Table S62. Thiazide diuretics Aurum product codes**

| Term from EMIS                                                             | Prod code ID    | dmd ID           | Drug substance name                                                    |
|----------------------------------------------------------------------------|-----------------|------------------|------------------------------------------------------------------------|
| Accuretic 10mg/12.5mg tablets (Pfizer Ltd)                                 | 11241000033113  | 260211000001104  | Hydrochlorothiazide/<br>Quinapril<br>hydrochloride                     |
| Acezide 25mg/50mg tablets (Bristol-Myers Squibb Pharmaceuticals Ltd)       | 13141000033119  | 263311000001101  | Captopril/<br>Hydrochlorothiazide                                      |
| Amilmaxco 5mg/50mg tablets (Ashbourne Pharmaceuticals Ltd)                 | 57341000033115  | 712211000001108  | Amiloride<br>hydrochloride/<br>Hydrochlorothiazide                     |
| Amil-Co 5mg/50mg tablets (IVAX Pharmaceuticals UK Ltd)                     | 60341000033110  | 636611000001107  | Amiloride<br>hydrochloride/<br>Hydrochlorothiazide                     |
| Capozide LS 12.5mg/25mg tablets (Bristol-Myers Squibb Pharmaceuticals Ltd) | 209241000033119 | 546711000001107  | Captopril/<br>Hydrochlorothiazide                                      |
| Carace 10 Plus tablets (Organon Pharma (UK) Ltd)                           | 209841000033115 | 3144511000001107 | Hydrochlorothiazide/<br>Lisinopril                                     |
| Capozide 25mg/50mg tablets (Bristol-Myers Squibb Pharmaceuticals Ltd)      | 216441000033110 | 17311000001102   | Captopril/<br>Hydrochlorothiazide                                      |
| Carace 20 Plus tablets (Organon Pharma (UK) Ltd)                           | 217041000033116 | 3143511000001109 | Hydrochlorothiazide/<br>Lisinopril                                     |
| Co-amilozide 5mg/50mg/5ml oral solution                                    | 351941000033111 | 8792311000001109 | Amiloride<br>hydrochloride/<br>Hydrochlorothiazide                     |
| Co-amilozide 5mg/50mg tablets                                              | 369141000033118 | 377566005        | Amiloride<br>hydrochloride/<br>Hydrochlorothiazide                     |
| Co-triamterzide 50mg/25mg tablets                                          | 370241000033111 | 410896007        | Hydrochlorothiazide/<br>Triamterene                                    |
| Cozaar-Comp 50mg/12.5mg tablets (Organon Pharma (UK) Ltd)                  | 370841000033110 | 255911000001105  | Hydrochlorothiazide/<br>Losartan potassium                             |
| Co-Betaloc tablets (Pfizer Ltd)                                            | 372741000033116 | 2977611000001106 | Hydrochlorothiazide/<br>Metoprolol tartrate                            |
| Co-Betaloc SA tablets (Pfizer Ltd)                                         | 372841000033114 | 3853411000001104 | Hydrochlorothiazide/<br>Metoprolol tartrate                            |
| Co-amilozide 2.5mg/25mg tablets                                            | 376941000033117 | 318121006        | Amiloride<br>hydrochloride/<br>Hydrochlorothiazide                     |
| Dyazide 50mg/25mg tablets (Advanz Pharma)                                  | 492341000033115 | 132811000001106  | Hydrochlorothiazide/<br>Triamterene                                    |
| Hydrosaluric 25mg tablets (Organon Pharma (UK) Ltd)                        | 742541000033112 | 4544011000001109 | Hydrochlorothiazide                                                    |
| Hydrosaluric 50mg tablets (Organon Pharma (UK) Ltd)                        | 742641000033113 | 4546211000001109 | Hydrochlorothiazide                                                    |
| Hydrochlorothiazide 25mg tablets                                           | 744941000033110 | 376209006        | Hydrochlorothiazide                                                    |
| Hydrochlorothiazide 50mg tablets                                           | 745441000033118 | 376508004        | Hydrochlorothiazide                                                    |
| Innozide 20mg/12.5mg tablets (Organon Pharma (UK) Ltd)                     | 770141000033115 | 146811000001108  | Enalapril maleate/<br>Hydrochlorothiazide                              |
| Kalten capsules (M & A Pharmachem Ltd)                                     | 793741000033117 | 237011000001100  | Amiloride<br>hydrochloride/<br>Atenolol/<br>Hydrochlorothiazide        |
| Moducren tablets (Organon Pharma (UK) Ltd)                                 | 935341000033118 | 74311000001101   | Amiloride<br>hydrochloride/<br>Hydrochlorothiazide/<br>Timolol maleate |
| Moduret 25 tablets (Organon Pharma (UK) Ltd)                               | 935441000033112 | 314211000001100  | Amiloride<br>hydrochloride/<br>Hydrochlorothiazide                     |



|                                                                  |                  |                   |                                                  |
|------------------------------------------------------------------|------------------|-------------------|--------------------------------------------------|
| Moduretic 5mg/50mg tablets (Merck Sharp & Dohme (UK) Ltd)        | 935541000033113  | 453811000001103   | Amiloride hydrochloride/<br>Hydrochlorothiazide  |
| Monozide 10 tablets (Wyeth Pharmaceuticals)                      | 937341000033111  | 4542911000001104  | Bisoprolol fumarate/<br>Hydrochlorothiazide      |
| Secadrex 200mg/12.5mg tablets (Sanofi)                           | 1274641000033111 | 878911000001106   | Acebutolol hydrochloride/<br>Hydrochlorothiazide |
| Triamaxco 50mg/25mg tablets (Ashbourne Pharmaceuticals Ltd)      | 1468141000033118 | 721311000001104   | Hydrochlorothiazide/<br>Triamterene              |
| Triam-Co 50mg/25mg tablets (IVAX Pharmaceuticals UK Ltd)         | 1470341000033112 | 191211000001106   | Hydrochlorothiazide/<br>Triamterene              |
| Zestoretic 10 tablets (AstraZeneca UK Ltd)                       | 1551841000033118 | 3144311000001101  | Hydrochlorothiazide/<br>Lisinopril               |
| Zestoretic 20 tablets (AstraZeneca UK Ltd)                       | 1552341000033118 | 3143111000001100  | Hydrochlorothiazide/<br>Lisinopril               |
| Co-zidocapt 12.5mg/25mg tablets                                  | 1893141000033119 | 318806002         | Captopril/<br>Hydrochlorothiazide                |
| Co-zidocapt 25mg/50mg tablets                                    | 1893241000033114 | 318807006         | Captopril/<br>Hydrochlorothiazide                |
| CoAprovel 150mg/12.5mg tablets (Sanofi)                          | 2216141000033115 | 792411000001108   | Hydrochlorothiazide/<br>Irbesartan               |
| CoAprovel 300mg/12.5mg tablets (Sanofi)                          | 2216241000033110 | 682711000001109   | Hydrochlorothiazide/<br>Irbesartan               |
| Hydrochlorothiazide 50mg/5ml oral solution                       | 2746441000033111 | 8529611000001101  | Hydrochlorothiazide                              |
| MicardisPlus 40mg/12.5mg tablets (Boehringer Ingelheim Ltd)      | 2864241000033110 | 3806311000001109  | Hydrochlorothiazide/<br>Telmisartan              |
| MicardisPlus 80mg/12.5mg tablets (Boehringer Ingelheim Ltd)      | 2864341000033117 | 3806911000001105  | Hydrochlorothiazide/<br>Telmisartan              |
| Caralpa 10mg/12.5mg tablets (Actavis UK Ltd)                     | 3136041000033117 | 7385911000001108  | Hydrochlorothiazide/<br>Lisinopril               |
| Caralpa 20mg/12.5mg tablets (Actavis UK Ltd)                     | 3136141000033118 | 7385711000001106  | Hydrochlorothiazide/<br>Lisinopril               |
| Co-Diovan 160mg/12.5mg tablets (Novartis Pharmaceuticals UK Ltd) | 3152541000033112 | 7668611000001104  | Hydrochlorothiazide/<br>Valsartan                |
| Co-Diovan 160mg/25mg tablets (Novartis Pharmaceuticals UK Ltd)   | 3152641000033113 | 7668911000001105  | Hydrochlorothiazide/<br>Valsartan                |
| Quinapril 10mg / Hydrochlorothiazide 12.5mg tablets              | 3160641000033118 | 39693411000001102 | Hydrochlorothiazide/<br>Quinapril hydrochloride  |
| Lisinopril 10mg / Hydrochlorothiazide 12.5mg tablets             | 3160841000033117 | 318884002         | Hydrochlorothiazide/<br>Lisinopril               |
| Lisinopril 20mg / Hydrochlorothiazide 12.5mg tablets             | 3160941000033113 | 318880006         | Hydrochlorothiazide/<br>Lisinopril               |
| Irbesartan 150mg / Hydrochlorothiazide 12.5mg tablets            | 3161141000033116 | 134461004         | Hydrochlorothiazide/<br>Irbesartan               |
| Irbesartan 300mg / Hydrochlorothiazide 12.5mg tablets            | 3161241000033111 | 134460003         | Hydrochlorothiazide/<br>Irbesartan               |
| Metoprolol 100mg / Hydrochlorothiazide 12.5mg tablets            | 3161341000033118 | 318546001         | Hydrochlorothiazide/<br>Metoprolol tartrate      |
| Valsartan 160mg / Hydrochlorothiazide 12.5mg tablets             | 3161441000033112 | 395521005         | Hydrochlorothiazide/<br>Valsartan                |
| Valsartan 160mg / Hydrochlorothiazide 25mg tablets               | 3161541000033113 | 409298002         | Hydrochlorothiazide/<br>Valsartan                |
| Losartan 50mg / Hydrochlorothiazide 12.5mg tablets               | 3161741000033117 | 318959004         | Hydrochlorothiazide/<br>Losartan potassium       |
| Enalapril 20mg / Hydrochlorothiazide 12.5mg tablets              | 3162241000033117 | 39691911000001109 | Enalapril maleate/<br>Hydrochlorothiazide        |
| Telmisartan 40mg / Hydrochlorothiazide 12.5mg tablets            | 3162641000033119 | 407855002         | Hydrochlorothiazide/<br>Telmisartan              |
| Telmisartan 80mg / Hydrochlorothiazide 12.5mg tablets            | 3162741000033111 | 407856001         | Hydrochlorothiazide/<br>Telmisartan              |

|                                                                                            |                  |                   |                                                                      |
|--------------------------------------------------------------------------------------------|------------------|-------------------|----------------------------------------------------------------------|
| Acebutolol 200mg / Hydrochlorothiazide 12.5mg tablets                                      | 3162941000033114 | 39725011000001105 | Acebutolol hydrochloride/<br>Hydrochlorothiazide                     |
| Valsartan 80mg / Hydrochlorothiazide 12.5mg tablets                                        | 3190741000033112 | 377488008         | Hydrochlorothiazide/<br>Valsartan                                    |
| Co-Diovan 80mg/12.5mg tablets (Novartis Pharmaceuticals UK Ltd)                            | 3190841000033119 | 8150111000001108  | Hydrochlorothiazide/<br>Valsartan                                    |
| Lisicostad 10mg/12.5mg tablets (Genus Pharmaceuticals Ltd)                                 | 3279541000033115 | 8145711000001102  | Hydrochlorothiazide/<br>Lisinopril                                   |
| Lisicostad 20mg/12.5mg tablets (Genus Pharmaceuticals Ltd)                                 | 3279641000033119 | 8145911000001100  | Hydrochlorothiazide/<br>Lisinopril                                   |
| Losartan 100mg / Hydrochlorothiazide 25mg tablets                                          | 3346841000033117 | 395497004         | Hydrochlorothiazide/<br>Losartan potassium                           |
| Cozaar-Comp 100mg/25mg tablets (Organon Pharma (UK) Ltd)                                   | 3346941000033113 | 9566911000001105  | Hydrochlorothiazide/<br>Losartan potassium                           |
| Olmesartan medoxomil 20mg / Hydrochlorothiazide 12.5mg tablets                             | 3908941000033112 | 409184002         | Hydrochlorothiazide/<br>Olmesartan medoxomil                         |
| Olmesartan medoxomil 20mg / Hydrochlorothiazide 25mg tablets                               | 3909041000033115 | 10270711000001105 | Hydrochlorothiazide/<br>Olmesartan medoxomil                         |
| Olmotec Plus 20mg/12.5mg tablets (Daiichi Sankyo UK Ltd)                                   | 3909141000033116 | 10261511000001103 | Hydrochlorothiazide/<br>Olmesartan medoxomil                         |
| Olmotec Plus 20mg/25mg tablets (Daiichi Sankyo UK Ltd)                                     | 3909241000033111 | 10261811000001100 | Hydrochlorothiazide/<br>Olmesartan medoxomil                         |
| Irbesartan 300mg / Hydrochlorothiazide 25mg tablets                                        | 3995241000033112 | 10970311000001105 | Hydrochlorothiazide/<br>Irbesartan                                   |
| CoAprovel 300mg/25mg tablets (Sanofi)                                                      | 3995341000033119 | 10968611000001106 | Hydrochlorothiazide/<br>Irbesartan                                   |
| Losartan 100mg / Hydrochlorothiazide 12.5mg tablets                                        | 4424741000033110 | 13112711000001103 | Hydrochlorothiazide/<br>Losartan potassium                           |
| Cozaar-Comp 100mg/12.5mg tablets (Organon Pharma (UK) Ltd)                                 | 4424841000033117 | 13094111000001102 | Hydrochlorothiazide/<br>Losartan potassium                           |
| Telmisartan 80mg / Hydrochlorothiazide 25mg tablets                                        | 4548741000033111 | 13731911000001109 | Hydrochlorothiazide/<br>Telmisartan                                  |
| MicardisPlus 80mg/25mg tablets (Boehringer Ingelheim Ltd)                                  | 4548841000033118 | 13719711000001103 | Hydrochlorothiazide/<br>Telmisartan                                  |
| Timolol 10mg / Amiloride 2.5mg / Hydrochlorothiazide 25mg tablets (Essential Generics Ltd) | 5376441000033114 | 16458411000001107 | Amiloride hydrochloride/<br>Hydrochlorothiazide/<br>Timolol maleate  |
| Olmesartan medoxomil 40mg / Hydrochlorothiazide 12.5mg tablets                             | 5566341000033111 | 409185001         | Hydrochlorothiazide/<br>Olmesartan medoxomil                         |
| Olmotec Plus 40mg/12.5mg tablets (Daiichi Sankyo UK Ltd)                                   | 5566441000033117 | 17220911000001102 | Hydrochlorothiazide/<br>Olmesartan medoxomil                         |
| Hydrochlorothiazide 5mg/5ml oral solution                                                  | 5969841000033119 | 12538711000001107 | Hydrochlorothiazide                                                  |
| Hydrochlorothiazide 5mg/5ml oral suspension                                                | 5969941000033110 | 12538811000001104 | Hydrochlorothiazide                                                  |
| Sevikar HCT 20mg/5mg/12.5mg tablets (Daiichi Sankyo UK Ltd)                                | 6180641000033112 | 18986411000001108 | Amlodipine besilate/<br>Hydrochlorothiazide/<br>Olmesartan medoxomil |
| Sevikar HCT 40mg/5mg/12.5mg tablets (Daiichi Sankyo UK Ltd)                                | 6180741000033115 | 18986711000001102 | Amlodipine besilate/<br>Hydrochlorothiazide/<br>Olmesartan medoxomil |
| Sevikar HCT 40mg/10mg/12.5mg tablets (Daiichi Sankyo UK Ltd)                               | 6180841000033113 | 18987011000001101 | Amlodipine besilate/<br>Hydrochlorothiazide/                         |

|                                                                  |                   |                   |                                                                      |
|------------------------------------------------------------------|-------------------|-------------------|----------------------------------------------------------------------|
|                                                                  |                   |                   | Olmesartan medoxomil                                                 |
| Sevikar HCT 40mg/5mg/25mg tablets (Daiichi Sankyo UK Ltd)        | 6180941000033117  | 18987311000001103 | Amlodipine besilate/<br>Hydrochlorothiazide/<br>Olmesartan medoxomil |
| Sevikar HCT 40mg/10mg/25mg tablets (Daiichi Sankyo UK Ltd)       | 6181041000033110  | 18987611000001108 | Amlodipine besilate/<br>Hydrochlorothiazide/<br>Olmesartan medoxomil |
| Actelsar HCT 40mg/12.5mg tablets (Actavis UK Ltd)                | 9159341000033112  | 24411411000001100 | Hydrochlorothiazide/<br>Telmisartan                                  |
| Actelsar HCT 80mg/12.5mg tablets (Actavis UK Ltd)                | 9159441000033118  | 24412511000001109 | Hydrochlorothiazide/<br>Telmisartan                                  |
| Actelsar HCT 80mg/25mg tablets (Accord Healthcare Ltd)           | 9159541000033117  | 24413611000001103 | Hydrochlorothiazide/<br>Telmisartan                                  |
| Tolucombi 40mg/12.5mg tablets (Consilient Health Ltd)            | 9292641000033116  | 24573211000001101 | Hydrochlorothiazide/<br>Telmisartan                                  |
| Tolucombi 80mg/12.5mg tablets (Consilient Health Ltd)            | 9292741000033113  | 24573411000001102 | Hydrochlorothiazide/<br>Telmisartan                                  |
| Lisoretic 10mg/12.5mg tablets (Bristol Laboratories Ltd)         | 13443441000033115 | 38240211000001100 | Hydrochlorothiazide/<br>Lisinopril                                   |
| Lisoretic 20mg/12.5mg tablets (Bristol Laboratories Ltd)         | 13443541000033119 | 38240011000001105 | Hydrochlorothiazide/<br>Lisinopril                                   |
| Chlorothiazide 250mg/5ml oral suspension                         | 246241000033116   | 408039005         | Chlorothiazide                                                       |
| Chlorothiazide 200mg/5ml oral suspension                         | 3924141000033111  | 12502311000001102 | Chlorothiazide                                                       |
| Chlorothiazide 250mg tablets                                     | 5093641000033110  | 395516007         | Chlorothiazide                                                       |
| Chlorothiazide 150mg/5ml oral suspension                         | 5899341000033118  | 8358511000001105  | Chlorothiazide                                                       |
| Chlorothiazide 25mg/5ml oral suspension                          | 5899441000033112  | 8358711000001100  | Chlorothiazide                                                       |
| Chlorothiazide 250mg/5ml oral solution                           | 5991141000033110  | 12503011000001109 | Chlorothiazide                                                       |
| Spirolactone 4mg / Chlorothiazide 40mg capsules                  | 7681541000033117  | 18520511000001107 | Chlorothiazide/<br>Spirolactone                                      |
| Spirolactone 3mg / Chlorothiazide 30mg capsules                  | 9278541000033112  | 16072811000001103 | Chlorothiazide/<br>Spirolactone                                      |
| Aprinox 2.5mg tablets (Advanz Pharma)                            | 74541000033119    | 672111000001100   | Bendroflumethiazide                                                  |
| Aprinox 5mg tablets (Amdipharm Plc)                              | 74641000033118    | 120911000001103   | Bendroflumethiazide                                                  |
| Centyl K modified-release tablets (LEO Pharma)                   | 234841000033110   | 3932711000001105  | Bendroflumethiazide/<br>Potassium chloride                           |
| Corgaretic 40mg tablets (Sanofi-Synthelabo Ltd)                  | 375441000033118   | 3886211000001102  | Bendroflumethiazide/<br>Nadolol                                      |
| Corgaretic 80mg tablets (Sanofi-Synthelabo Ltd)                  | 375541000033117   | 4057911000001102  | Bendroflumethiazide/<br>Nadolol                                      |
| Inderetic 80mg/2.5mg capsules (AstraZeneca UK Ltd)               | 756641000033114   | 333111000001104   | Bendroflumethiazide/<br>Propranolol hydrochloride                    |
| Inderex 160mg/5mg modified-release capsules (AstraZeneca UK Ltd) | 756741000033117   | 350811000001100   | Bendroflumethiazide/<br>Propranolol hydrochloride                    |
| Neo-Naclex 5mg tablets (Mercury Pharma Group Ltd)                | 965341000033114   | 817911000001100   | Bendroflumethiazide                                                  |
| Neo-Naclex-K modified-release tablets (Mercury Pharma Group Ltd) | 967041000033118   | 3638211000001100  | Bendroflumethiazide/<br>Potassium chloride                           |
| Prestim tablets (Meda Pharmaceuticals Ltd)                       | 1132741000033111  | 98411000001109    | Bendroflumethiazide/<br>Timolol maleate                              |
| Tenben 25mg/1.25mg capsules (Galen Ltd)                          | 1414241000033117  | 721411000001106   | Atenolol/<br>Bendroflumethiazide                                     |
| Urizide 5mg tablets (Dr Reddy's Laboratories (UK) Ltd)           | 1495441000033116  | 898211000001109   | Bendroflumethiazide                                                  |

|                                                                                                   |                  |                   |                                            |
|---------------------------------------------------------------------------------------------------|------------------|-------------------|--------------------------------------------|
| Urizide 2.5mg tablets (Dr Reddy's Laboratories (UK) Ltd)                                          | 2955941000033119 | 485311000001101   | Bendroflumethiazide                        |
| Bendroflumethiazide 2.5mg tablets                                                                 | 3083141000033112 | 317919004         | Bendroflumethiazide                        |
| Bendroflumethiazide 5mg tablets                                                                   | 3083241000033117 | 317920005         | Bendroflumethiazide                        |
| Bendroflumethiazide 2.5mg/5ml oral suspension                                                     | 3151841000033117 | 8306811000001101  | Bendroflumethiazide                        |
| Bendroflumethiazide 2.5mg / Potassium chloride 573mg (potassium 7.7mmol) modified-release tablets | 3161041000033115 | 35910011000001105 | Bendroflumethiazide/<br>Potassium chloride |
| Bendroflumethiazide 2.5mg / Potassium chloride 630mg (potassium 8.4mmol) modified-release tablets | 3162841000033118 | 35910111000001106 | Bendroflumethiazide/<br>Potassium chloride |
| Timolol 10mg / Bendroflumethiazide 2.5mg tablets                                                  | 3346641000033118 | 318556002         | Bendroflumethiazide/<br>Timolol maleate    |
| Bendroflumethiazide 5mg/5ml oral suspension                                                       | 5401741000033110 | 8306711000001109  | Bendroflumethiazide                        |
| Bendroflumethiazide 1.25mg/5ml oral suspension                                                    | 5453941000033119 | 8307011000001105  | Bendroflumethiazide                        |
| Neo-Naclex 2.5mg tablets (Advanz Pharma)                                                          | 6045641000033115 | 18149011000001101 | Bendroflumethiazide                        |
| Nephрил 1mg tablets (Pfizer Ltd)                                                                  | 965441000033115  | 4549211000001100  | Polythiazide                               |
| Polythiazide 1mg tablets                                                                          | 1110141000033119 | 317967009         | Polythiazide                               |

**Table S63. Thiazide like diuretics Aurum product codes**

| Term from EMIS                                                       | Prod code ID      | dmd ID            | Drug substance name                 |
|----------------------------------------------------------------------|-------------------|-------------------|-------------------------------------|
| Indapamide 1.5mg modified-release tablets                            | 765741000033116   | 39020711000001100 | Indapamide                          |
| Indapamide 2.5mg tablets                                             | 768641000033118   | 39696211000001108 | Indapamide hemihydrate              |
| Nindaxa 2.5 tablets (Ashbourne Pharmaceuticals Ltd)                  | 769741000033118   | 424311000001108   | Indapamide hemihydrate              |
| Natrilix SR 1.5mg tablets (Servier Laboratories Ltd)                 | 953141000033119   | 456611000001108   | Indapamide                          |
| Natrilix 2.5mg tablets (Servier Laboratories Ltd)                    | 955341000033117   | 321811000001109   | Indapamide hemihydrate              |
| Coversyl Plus tablets (Servier Laboratories Ltd)                     | 2739541000033117  | 562511000001109   | Indapamide/<br>Perindopril erbumine |
| Perindopril erbumine 4mg / Indapamide 1.25mg tablets                 | 3161641000033114  | 3437611000001100  | Indapamide/<br>Perindopril erbumine |
| Perindopril arginine 5mg / Indapamide 1.25mg tablets                 | 4454541000033118  | 13454311000001101 | Indapamide/<br>Perindopril arginine |
| Coversyl Arginine Plus 5mg/1.25mg tablets (Servier Laboratories Ltd) | 4454641000033117  | 13444311000001104 | Indapamide/<br>Perindopril arginine |
| Ethibide XL 1.5mg tablets (Genus Pharmaceuticals Ltd)                | 4571241000033110  | 13824811000001102 | Indapamide                          |
| Tensaid XL 1.5mg tablets (Mylan)                                     | 4656741000033119  | 14242211000001100 | Indapamide                          |
| Indipam XL 1.5mg tablets (Accord Healthcare Ltd)                     | 5053141000033113  | 15436111000001104 | Indapamide                          |
| Mapemid XL 1.5mg tablets (Teva UK Ltd)                               | 5128741000033110  | 15600711000001107 | Indapamide                          |
| Rawel XL 1.5mg tablets (Consilient Health Ltd)                       | 5566041000033114  | 16737911000001105 | Indapamide                          |
| Varbim XL 1.5mg tablets (Teva UK Ltd)                                | 5816741000033112  | 14693611000001102 | Indapamide                          |
| Indapamide 2.5mg/5ml oral suspension                                 | 8197041000033112  | 21578911000001105 | Indapamide                          |
| Perindopril tosilate 5mg / Indapamide 1.25mg tablets                 | 8263641000033112  | 21940011000001101 | Indapamide/<br>Perindopril tosilate |
| Cardide SR 1.5mg tablets (Teva UK Ltd)                               | 9121841000033115  | 24331611000001104 | Indapamide                          |
| Alkapamid XL 1.5mg tablets (HBS Healthcare Ltd)                      | 12312641000033118 | 34494911000001106 | Indapamide                          |
| Lorvacx XL 1.5mg tablets (Torrent Pharma (UK) Ltd)                   | 12988441000033113 | 36812711000001103 | Indapamide                          |
| Diurexan 20mg tablets (Mylan)                                        | 470741000033113   | 348911000001105   | Xipamide                            |
| Xipamide 20mg tablets                                                | 1543941000033111  | 317970008         | Xipamide                            |
| Viskaldix tablets (Advanz Pharma)                                    | 1523941000033114  | 3638411000001101  | Cloпамide/<br>Pindolol              |
| Pindolol 10mg / Cloпамide 5mg tablets                                | 3163141000033117  | 318552000         | Cloпамide/<br>Pindolol              |

**Table S64. Potassium sparing diuretics Aurum product codes**

| Term from EMIS                                             | Prod code ID    | dmd ID            | Drug substance name                                                 |
|------------------------------------------------------------|-----------------|-------------------|---------------------------------------------------------------------|
| Amiloride 5mg/5ml oral solution sugar free                 | 53841000033117  | 35900111000001108 | Amiloride hydrochloride                                             |
| Amiloride 5mg tablets                                      | 57141000033118  | 318052005         | Amiloride hydrochloride                                             |
| Amilmaxco 5mg/50mg tablets (Ashbourne Pharmaceuticals Ltd) | 57341000033115  | 712211000001108   | Amiloride hydrochloride/<br>Hydrochlorothiazide                     |
| Amil-Co 5mg/50mg tablets (IVAX Pharmaceuticals UK Ltd)     | 60341000033110  | 636611000001107   | Amiloride hydrochloride/<br>Hydrochlorothiazide                     |
| Burinex A 5mg/1mg tablets (LEO Pharma)                     | 172341000033112 | 33911000001104    | Amiloride hydrochloride/<br>Bumetanide                              |
| Co-amilozone 5mg/50mg/5ml oral solution                    | 351941000033111 | 8792311000001109  | Amiloride hydrochloride/<br>Hydrochlorothiazide                     |
| Co-amilozone 5mg/50mg tablets                              | 369141000033118 | 377566005         | Amiloride hydrochloride/<br>Hydrochlorothiazide                     |
| Co-amilofruse 5mg/40mg tablets                             | 376641000033112 | 318136009         | Amiloride hydrochloride/<br>Furosemide                              |
| Co-amilofruse 10mg/80mg tablets                            | 376741000033115 | 318137000         | Amiloride hydrochloride/<br>Furosemide                              |
| Co-amilofruse 2.5mg/20mg tablets                           | 376841000033113 | 318135008         | Amiloride hydrochloride/<br>Furosemide                              |
| Co-amilozone 2.5mg/25mg tablets                            | 376941000033117 | 318121006         | Amiloride hydrochloride/<br>Hydrochlorothiazide                     |
| Frumil LS 20mg/2.5mg tablets (Sanofi)                      | 614341000033113 | 550711000001106   | Amiloride hydrochloride/<br>Furosemide                              |
| Frumil 40mg/5mg tablets (Sanofi)                           | 614641000033117 | 427411000001106   | Amiloride hydrochloride/<br>Furosemide                              |
| Fru-Co 5mg/40mg tablets (Teva UK Ltd)                      | 615241000033116 | 818511000001106   | Amiloride hydrochloride/<br>Furosemide                              |
| Frumil Forte 10mg/80mg tablets (Sanofi)                    | 615641000033118 | 82611000001106    | Amiloride hydrochloride/<br>Furosemide                              |
| Kalten capsules (M & A Pharmachem Ltd)                     | 793741000033117 | 237011000001100   | Amiloride hydrochloride/<br>Atenolol/<br>Hydrochlorothiazide        |
| Lasoride 5mg/40mg tablets (Sanofi)                         | 818941000033112 | 678511000001106   | Amiloride hydrochloride/<br>Furosemide                              |
| Moducren tablets (Organon Pharma (UK) Ltd)                 | 935341000033118 | 74311000001101    | Amiloride hydrochloride/<br>Hydrochlorothiazide/<br>Timolol maleate |
| Moduret 25 tablets (Organon Pharma (UK) Ltd)               | 935441000033112 | 314211000001100   | Amiloride hydrochloride/<br>Hydrochlorothiazide                     |
| Moduretic 5mg/50mg tablets (Merck Sharp & Dohme (UK) Ltd)  | 935541000033113 | 453811000001103   | Amiloride hydrochloride/<br>Hydrochlorothiazide                     |

|                                                                                            |                  |                   |                                                                     |
|--------------------------------------------------------------------------------------------|------------------|-------------------|---------------------------------------------------------------------|
| Navispare 2.5mg/250microgram tablets (Advanz Pharma)                                       | 956741000033114  | 535711000001100   | Amiloride hydrochloride/<br>Cyclopentiazide                         |
| Froop Co 5mg/40mg tablets (Ashbourne Pharmaceuticals Ltd)                                  | 1611441000033117 | 331311000001103   | Amiloride hydrochloride/<br>Furosemide                              |
| Amiloride 5mg / Bumetanide 1mg tablets                                                     | 1845641000033119 | 318097001         | Amiloride hydrochloride/<br>Bumetanide                              |
| Amiloride 2.5mg / Cyclopentiazide 250microgram tablets                                     | 1903541000033116 | 318096005         | Amiloride hydrochloride/<br>Cyclopentiazide                         |
| Amilamont 5mg/5ml oral solution sugar free (Rosemont Pharmaceuticals Ltd)                  | 2101641000033119 | 799711000001108   | Amiloride hydrochloride                                             |
| Amoride 5mg tablets (Dr Reddy's Laboratories (UK) Ltd)                                     | 2956041000033112 | 220711000001102   | Amiloride hydrochloride                                             |
| Timolol 10mg / Amiloride 2.5mg / Hydrochlorothiazide 25mg tablets (Essential Generics Ltd) | 5376441000033114 | 16458411000001107 | Amiloride hydrochloride/<br>Hydrochlorothiazide/<br>Timolol maleate |
| Co-amilofruse 5mg/40mg/5ml oral suspension                                                 | 5710441000033117 | 8427011000001108  | Amiloride hydrochloride/<br>Furosemide                              |
| Co-triamterzide 50mg/25mg tablets                                                          | 370241000033111  | 410896007         | Hydrochlorothiazide/<br>Triamterene                                 |
| Dytac 50mg capsules (Advanz Pharma)                                                        | 491641000033116  | 3907911000001100  | Triamterene                                                         |
| Dytide capsules (Mercury Pharma Group Ltd)                                                 | 491741000033113  | 714911000001108   | Benzthiazide/<br>Triamterene                                        |
| Dyazide 50mg/25mg tablets (Advanz Pharma)                                                  | 492341000033115  | 132811000001106   | Hydrochlorothiazide/<br>Triamterene                                 |
| Frusene 50mg/40mg tablets (Orion Pharma (UK) Ltd)                                          | 615041000033112  | 25411000001108    | Furosemide/<br>Triamterene                                          |
| Kalspare tablets (DHP Healthcare Ltd)                                                      | 796541000033115  | 3252011000001105  | Chlortalidone/<br>Triamterene                                       |
| Triamterene 50mg capsules                                                                  | 1455341000033115 | 318082004         | Triamterene                                                         |
| Triamaxco 50mg/25mg tablets (Ashbourne Pharmaceuticals Ltd)                                | 1468141000033118 | 721311000001104   | Hydrochlorothiazide/<br>Triamterene                                 |
| Triam-Co 50mg/25mg tablets (IVAX Pharmaceuticals UK Ltd)                                   | 1470341000033112 | 191211000001106   | Hydrochlorothiazide/<br>Triamterene                                 |
| Triamterene 50mg / Furosemide 40mg tablets                                                 | 3092741000033119 | 318101005         | Furosemide/<br>Triamterene                                          |
| Triamterene 50mg / Benzthiazide 25mg capsules                                              | 3161941000033119 | 318098006         | Benzthiazide/<br>Triamterene                                        |
| Triamterene 50mg / Chlortalidone 50mg tablets                                              | 3162341000033110 | 318100006         | Chlortalidone/<br>Triamterene                                       |

**Table S65. Dihydropyridines Aurum product codes**

| Term from EMIS                                               | Prod code ID     | dmd ID            | Drug substance name                                                     |
|--------------------------------------------------------------|------------------|-------------------|-------------------------------------------------------------------------|
| Istin 5mg tablets (Upjohn UK Ltd)                            | 787941000033112  | 172711000001100   | Amlodipine                                                              |
| Istin 10mg tablets (Upjohn UK Ltd)                           | 788041000033110  | 408111000001107   | Amlodipine                                                              |
| Amlodipine 5mg tablets                                       | 3038041000033111 | 39732011000001102 | Amlodipine                                                              |
| Amlodipine 10mg tablets                                      | 3038141000033110 | 39731911000001109 | Amlodipine                                                              |
| Amlostin 5mg tablets (Discovery Pharmaceuticals)             | 3188741000033111 | 8046211000001107  | Amlodipine                                                              |
| Amlostin 10mg tablets (Discovery Pharmaceuticals)            | 3188841000033118 | 8046411000001106  | Amlodipine                                                              |
| Amlodipine 10mg/5ml oral suspension                          | 3963741000033115 | 8278111000001105  | Amlodipine                                                              |
| Amlodipine 5mg / Valsartan 80mg tablets                      | 4021441000033114 | 11160311000001109 | Amlodipine besilate/<br>Valsartan                                       |
| Amlodipine 5mg / Valsartan 160mg tablets                     | 4021541000033110 | 11160211000001101 | Amlodipine besilate/<br>Valsartan                                       |
| Amlodipine 10mg / Valsartan 160mg tablets                    | 4021641000033111 | 11160111000001107 | Amlodipine besilate/<br>Valsartan                                       |
| Exforge 5mg/80mg tablets (Novartis Pharmaceuticals UK Ltd)   | 4021741000033119 | 11161811000001108 | Amlodipine besilate/<br>Valsartan                                       |
| Exforge 5mg/160mg tablets (Novartis Pharmaceuticals UK Ltd)  | 4021841000033112 | 11161511000001105 | Amlodipine besilate/<br>Valsartan                                       |
| Exforge 10mg/160mg tablets (Novartis Pharmaceuticals UK Ltd) | 4021941000033116 | 11160711000001108 | Amlodipine besilate/<br>Valsartan                                       |
| Amlodipine 5mg/5ml oral solution sugar free                  | 4508041000033119 | 29826311000001101 | Amlodipine                                                              |
| Amlodipine 1.5mg/5ml oral suspension                         | 4897741000033118 | 15773511000001108 | Amlodipine                                                              |
| Olmesartan medoxomil 20mg / Amlodipine 5mg tablets           | 5005841000033114 | 429502004         | Amlodipine besilate/<br>Olmesartan<br>medoxomil                         |
| Olmesartan medoxomil 40mg / Amlodipine 5mg tablets           | 5005941000033118 | 429503009         | Amlodipine besilate/<br>Olmesartan<br>medoxomil                         |
| Olmesartan medoxomil 40mg / Amlodipine 10mg tablets          | 5006041000033111 | 429678006         | Amlodipine besilate/<br>Olmesartan<br>medoxomil                         |
| Sevikar 20mg/5mg tablets (Daiichi Sankyo UK Ltd)             | 5006141000033110 | 15773211000001105 | Amlodipine besilate/<br>Olmesartan<br>medoxomil                         |
| Sevikar 40mg/5mg tablets (Daiichi Sankyo UK Ltd)             | 5006241000033115 | 15772911000001108 | Amlodipine besilate/<br>Olmesartan<br>medoxomil                         |
| Sevikar 40mg/10mg tablets (Daiichi Sankyo UK Ltd)            | 5006341000033113 | 15772611000001102 | Amlodipine besilate/<br>Olmesartan<br>medoxomil                         |
| Amlodipine 5mg/5ml oral solution                             | 5490241000033113 | 13892511000001100 | Amlodipine                                                              |
| Amlodipine 5mg/5ml oral suspension                           | 5888741000033110 | 8278311000001107  | Amlodipine                                                              |
| Sevikar HCT 20mg/5mg/12.5mg tablets (Daiichi Sankyo UK Ltd)  | 6180641000033112 | 18986411000001108 | Amlodipine besilate/<br>Hydrochlorothiazide/<br>Olmesartan<br>medoxomil |
| Sevikar HCT 40mg/5mg/12.5mg tablets (Daiichi Sankyo UK Ltd)  | 6180741000033115 | 18986711000001102 | Amlodipine besilate/<br>Hydrochlorothiazide/<br>Olmesartan<br>medoxomil |
| Sevikar HCT 40mg/10mg/12.5mg tablets (Daiichi Sankyo UK Ltd) | 6180841000033113 | 18987011000001101 | Amlodipine besilate/<br>Hydrochlorothiazide/<br>Olmesartan<br>medoxomil |



|                                                                 |                   |                   |                                                                         |
|-----------------------------------------------------------------|-------------------|-------------------|-------------------------------------------------------------------------|
| Sevikar HCT 40mg/5mg/25mg tablets (Daiichi Sankyo UK Ltd)       | 6180941000033117  | 18987311000001103 | Amlodipine besilate/<br>Hydrochlorothiazide/<br>Olmesartan<br>medoxomil |
| Sevikar HCT 40mg/10mg/25mg tablets (Daiichi Sankyo UK Ltd)      | 6181041000033110  | 18987611000001108 | Amlodipine besilate/<br>Hydrochlorothiazide/<br>Olmesartan<br>medoxomil |
| Amlodipine 10mg/5ml oral solution                               | 7740641000033112  | 20478011000001105 | Amlodipine                                                              |
| Perindopril erbumine 4mg / Amlodipine 5mg tablets               | 9105241000033114  | 23985011000001108 | Amlodipine besilate/<br>Perindopril erbumine                            |
| Perindopril erbumine 4mg / Amlodipine 10mg tablets              | 9105341000033116  | 23984911000001108 | Amlodipine besilate/<br>Perindopril erbumine                            |
| Perindopril erbumine 8mg / Amlodipine 5mg tablets               | 9105441000033110  | 23985211000001103 | Amlodipine besilate/<br>Perindopril erbumine                            |
| Perindopril erbumine 8mg / Amlodipine 10mg tablets              | 9105541000033111  | 23985111000001109 | Amlodipine besilate/<br>Perindopril erbumine                            |
| Amlodipine 10mg/5ml oral solution sugar free                    | 10387441000033111 | 29826211000001109 | Amlodipine                                                              |
| Amlodipine 5mg/5ml oral suspension sugar free                   | 12682241000033110 | 36237311000001101 | Amlodipine                                                              |
| Amlodipine 2.5mg tablets                                        | 13422241000033114 | 429828006         | Amlodipine                                                              |
| Felodipine 2.5mg modified-release tablets                       | 568041000033111   | 39020311000001104 | Felodipine                                                              |
| Felodipine 10mg modified-release tablets                        | 569041000033115   | 39020511000001105 | Felodipine                                                              |
| Felodipine 5mg modified-release tablets                         | 569141000033116   | 39020611000001109 | Felodipine                                                              |
| Plendil 2.5mg modified-release tablets (AstraZeneca UK Ltd)     | 1093941000033116  | 562711000001104   | Felodipine                                                              |
| Plendil 10mg modified-release tablets (AstraZeneca UK Ltd)      | 1094041000033119  | 48511000001101    | Felodipine                                                              |
| Plendil 5mg modified-release tablets (AstraZeneca UK Ltd)       | 1094141000033115  | 490211000001101   | Felodipine                                                              |
| Triapin 5mg/5mg modified-release tablets (Sanofi)               | 1834341000033110  | 3887911000001109  | Felodipine/ Ramipril                                                    |
| Cabren 2.5mg modified-release tablets (Teva UK Ltd)             | 2928841000033117  | 3800311000001106  | Felodipine                                                              |
| Cabren 5mg modified-release tablets (Teva UK Ltd)               | 2928941000033113  | 3800511000001100  | Felodipine                                                              |
| Cabren 10mg modified-release tablets (Teva UK Ltd)              | 2929041000033116  | 3800711000001105  | Felodipine                                                              |
| Felotens XL 5mg tablets (Thornton & Ross Ltd)                   | 2979941000033119  | 4785111000001103  | Felodipine                                                              |
| Felotens XL 10mg tablets (Thornton & Ross Ltd)                  | 2980041000033115  | 4785511000001107  | Felodipine                                                              |
| Vascalpha 5mg modified-release tablets (Accord Healthcare Ltd)  | 3034341000033117  | 5638311000001102  | Felodipine                                                              |
| Vascalpha 10mg modified-release tablets (Accord Healthcare Ltd) | 3034441000033111  | 5638811000001106  | Felodipine                                                              |
| Cardioplén XL 5mg tablets (Chiesi Ltd)                          | 3154841000033119  | 7887011000001104  | Felodipine                                                              |
| Cardioplén XL 10mg tablets (Chiesi Ltd)                         | 3154941000033110  | 7887511000001107  | Felodipine                                                              |
| Felodipine 5mg modified-release / Ramipril 5mg tablets          | 3163241000033112  | 318177008         | Felodipine/ Ramipril                                                    |
| Felodipine 2.5mg modified-release / Ramipril 2.5mg tablets      | 3163341000033119  | 318176004         | Felodipine/ Ramipril                                                    |
| Felogen XL 5mg tablets (Mylan)                                  | 3177441000033110  | 4972811000001103  | Felodipine                                                              |
| Felogen XL 10mg tablets (Mylan)                                 | 3177541000033111  | 4973011000001100  | Felodipine                                                              |
| Cardioplén XL 2.5mg tablets (Chiesi Ltd)                        | 4152841000033112  | 11506711000001103 | Felodipine                                                              |
| Felotens XL 2.5mg tablets (Thornton & Ross Ltd)                 | 4429241000033115  | 13127311000001107 | Felodipine                                                              |
| Neofel XL 2.5mg tablets (Actavis UK Ltd)                        | 4521541000033113  | 18167311000001103 | Felodipine                                                              |
| Neofel XL 5mg tablets (Kent Pharma (UK) Ltd)                    | 4521641000033114  | 8090111000001106  | Felodipine                                                              |

|                                                           |                  |                   |                             |
|-----------------------------------------------------------|------------------|-------------------|-----------------------------|
| Neofel XL 10mg tablets (Kent Pharma (UK) Ltd)             | 4521741000033117 | 8089811000001107  | Felodipine                  |
| Folpik XL 10mg tablets (Teva UK Ltd)                      | 5576341000033118 | 5008911000001100  | Felodipine                  |
| Folpik XL 2.5mg tablets (Teva UK Ltd)                     | 5576441000033112 | 13565311000001101 | Felodipine                  |
| Folpik XL 5mg tablets (Teva UK Ltd)                       | 5576541000033113 | 5008511000001107  | Felodipine                  |
| Triapin 2.5mg/2.5mg modified-release tablets (Sanofi)     | 8264941000033119 | 4093211000001109  | Felodipine/ Ramipril        |
| Parmid XL 2.5mg tablets (Sandoz Ltd)                      | 9121541000033117 | 24221811000001105 | Felodipine                  |
| Parmid XL 5mg tablets (Sandoz Ltd)                        | 9121641000033116 | 7387911000001103  | Felodipine                  |
| Parmid XL 10mg tablets (Sandoz Ltd)                       | 9121741000033113 | 7388311000001103  | Felodipine                  |
| Isradipine 2.5mg tablets                                  | 784641000033112  | 319280009         | Isradipine                  |
| Prescal 2.5mg tablets (Novartis Pharmaceuticals UK Ltd)   | 1140241000033117 | 3689711000001108  | Isradipine                  |
| Lercanidipine 10mg tablets                                | 825941000033112  | 319316005         | Lercanidipine hydrochloride |
| Zanidip 10mg tablets (Recordati Pharmaceuticals Ltd)      | 1550841000033111 | 20011000001105    | Lercanidipine hydrochloride |
| Lercanidipine 20mg tablets                                | 3908741000033114 | 10225911000001102 | Lercanidipine hydrochloride |
| Zanidip 20mg tablets (Recordati Pharmaceuticals Ltd)      | 3908841000033116 | 10198711000001102 | Lercanidipine hydrochloride |
| Cardene 20mg capsules (Astellas Pharma Ltd)               | 176741000033114  | 344811000001108   | Nicardipine hydrochloride   |
| Cardene 30mg capsules (Astellas Pharma Ltd)               | 176841000033116  | 291111000001102   | Nicardipine hydrochloride   |
| Cardene SR 30mg capsules (Astellas Pharma Ltd)            | 198941000033118  | 540311000001105   | Nicardipine hydrochloride   |
| Cardene SR 45mg capsules (Astellas Pharma Ltd)            | 199041000033110  | 118811000001102   | Nicardipine hydrochloride   |
| Nicardipine 30mg capsules                                 | 967141000033119  | 319218009         | Nicardipine hydrochloride   |
| Nicardipine 20mg capsules                                 | 967741000033115  | 319217004         | Nicardipine hydrochloride   |
| Nicardipine 30mg modified-release capsules                | 971441000033112  | 39021711000001108 | Nicardipine hydrochloride   |
| Nicardipine 45mg modified-release capsules                | 971541000033113  | 39021811000001100 | Nicardipine hydrochloride   |
| Adalat 10mg capsules (Bayer Plc)                          | 14041000033115   | 782511000001108   | Nifedipine                  |
| Adalat 5mg capsules (Bayer Plc)                           | 14141000033116   | 27111000001107    | Nifedipine                  |
| Adalat LA 30mg tablets (Bayer Plc)                        | 17141000033112   | 2881311000001105  | Nifedipine                  |
| Adalat LA 60mg tablets (Bayer Plc)                        | 17241000033117   | 235511000001104   | Nifedipine                  |
| Adipine MR 20 tablets (Chiesi Ltd)                        | 18241000033116   | 74111000001103    | Nifedipine                  |
| Adipine MR 10 tablets (Chiesi Ltd)                        | 18341000033114   | 833611000001109   | Nifedipine                  |
| Adalat retard 20mg tablets (Bayer Plc)                    | 19341000033119   | 5011000001109     | Nifedipine                  |
| Adalat retard 10mg tablets (Bayer Plc)                    | 19441000033113   | 569011000001108   | Nifedipine                  |
| Angiopine 10 capsules (Ashbourne Pharmaceuticals Ltd)     | 61841000033111   | 811311000001107   | Nifedipine                  |
| Angiopine MR 20mg tablets (Ashbourne Pharmaceuticals Ltd) | 65241000033114   | 865011000001105   | Nifedipine                  |
| Angiopine MR 10mg tablets (Ashbourne Pharmaceuticals Ltd) | 66141000033114   | 568911000001104   | Nifedipine                  |
| Beta-Adalat modified-release capsules (Bayer Plc)         | 124341000033119  | 3142711000001107  | Atenolol/ Nifedipine        |
| Cardilate MR 20mg tablets (IVAX Pharmaceuticals UK Ltd)   | 199141000033114  | 905711000001103   | Nifedipine                  |
| Coracten SR 10mg capsules (UCB Pharma Ltd)                | 336641000033114  | 126411000001108   | Nifedipine                  |

|                                                                |                  |                   |                      |
|----------------------------------------------------------------|------------------|-------------------|----------------------|
| Coracten SR 20mg capsules (UCB Pharma Ltd)                     | 364241000033112  | 389611000001101   | Nifedipine           |
| Fortipine LA 40 tablets (Advanz Pharma)                        | 605941000033110  | 188711000001108   | Nifedipine           |
| Hypolar Retard 20 tablets (Sandoz Ltd)                         | 738141000033119  | 677411000001108   | Nifedipine           |
| Nifedipine 10mg capsules                                       | 967241000033114  | 319223009         | Nifedipine           |
| Nifedipine 5mg capsules                                        | 967341000033116  | 319222004         | Nifedipine           |
| Nifedipine 20mg modified-release tablets                       | 970941000033113  | 39022811000001109 | Nifedipine           |
| Nifedipine 10mg modified-release capsules                      | 971141000033116  | 39022911000001104 | Nifedipine           |
| Nifedipine 30mg modified-release tablets                       | 971241000033111  | 39111711000001105 | Nifedipine           |
| Nifedipine 60mg modified-release tablets                       | 971341000033118  | 39022611000001105 | Nifedipine           |
| Nifedipine 10mg modified-release tablets                       | 971841000033110  | 39022711000001101 | Nifedipine           |
| Nifedipine 40mg modified-release tablets                       | 972441000033116  | 39107611000001108 | Nifedipine           |
| Nifedipine 20mg modified-release capsules                      | 974141000033119  | 39022511000001106 | Nifedipine           |
| Tenif 50mg/20mg modified-release capsules (AstraZeneca UK Ltd) | 1414941000033114 | 3142511000001102  | Atenolol/ Nifedipine |
| Tensipine MR 10 tablets (Genus Pharmaceuticals Ltd)            | 1421241000033110 | 413111000001101   | Nifedipine           |
| Tensipine MR 20 tablets (Genus Pharmaceuticals Ltd)            | 1421341000033117 | 385611000001104   | Nifedipine           |
| Cardilate MR 10mg tablets (Teva UK Ltd)                        | 1580841000033116 | 25911000001100    | Nifedipine           |
| Slofedipine 20mg tablets (Sterwin Medicines)                   | 1697641000033111 | 843411000001105   | Nifedipine           |
| Coracten XL 30mg capsules (UCB Pharma Ltd)                     | 1724941000033113 | 162811000001100   | Nifedipine           |
| Coracten XL 60mg capsules (UCB Pharma Ltd)                     | 1725041000033113 | 3381511000001105  | Nifedipine           |
| Nifedipress MR 10 tablets (Dexcel-Pharma Ltd)                  | 1745041000033110 | 904011000001104   | Nifedipine           |
| Nifedipress MR 20 tablets (Dexcel-Pharma Ltd)                  | 1745141000033114 | 619111000001101   | Nifedipine           |
| Slofedipine XL 30mg tablets (Zentiva Pharma UK Ltd)            | 1752941000033115 | 2882011000001104  | Nifedipine           |
| Slofedipine XL 60 tablets (Zentiva Pharma UK Ltd)              | 1753041000033113 | 630411000001107   | Nifedipine           |
| Adalat LA 20mg tablets (Bayer Plc)                             | 1766341000033113 | 881811000001100   | Nifedipine           |
| Nifedipine 30mg modified-release capsules                      | 1778741000033118 | 39107511000001109 | Nifedipine           |
| Nifedipine 60mg modified-release capsules                      | 1778841000033111 | 38896511000001101 | Nifedipine           |
| Coroday MR 20mg tablets (Mylan)                                | 2051241000033116 | 309611000001102   | Nifedipine           |
| Nifopress Retard 20mg tablets (Advanz Pharma)                  | 2189541000033117 | 280811000001100   | Nifedipine           |
| Calchan MR 10 tablets (Ranbaxy (UK) Ltd)                       | 2295641000033116 | 627111000001104   | Nifedipine           |
| Calchan MR 20 tablets (Ranbaxy (UK) Ltd)                       | 2295741000033113 | 17011000001100    | Nifedipine           |
| Nifedipine 20mg/ml oral drops                                  | 2639341000033117 | 9096811000001100  | Nifedipine           |
| Hypolar XL 30 tablets (Sandoz Ltd)                             | 2776541000033111 | 2881811000001101  | Nifedipine           |
| Valni 20 Retard tablets (Tillomed Laboratories Ltd)            | 2955041000033115 | 693311000001101   | Nifedipine           |
| Adipine XL 30mg tablets (Chiesi Ltd)                           | 3225441000033117 | 9049711000001108  | Nifedipine           |
| Adipine XL 60mg tablets (Chiesi Ltd)                           | 3225541000033116 | 9049911000001105  | Nifedipine           |
| Atenolol 50mg / Nifedipine 20mg modified-release capsules      | 3246941000033118 | 35903311000001104 | Atenolol/ Nifedipine |
| Nimodrel XL 30mg tablets (Zurich Pharmaceuticals)              | 3952641000033110 | 10189111000001106 | Nifedipine           |
| Nimodrel XL 60mg tablets (Zurich Pharmaceuticals)              | 3952741000033118 | 10189311000001108 | Nifedipine           |
| Valni XL 30mg tablets (Zentiva Pharma UK Ltd)                  | 4451941000033110 | 13401911000001109 | Nifedipine           |

|                                                                  |                   |                   |             |
|------------------------------------------------------------------|-------------------|-------------------|-------------|
| Valni XL 60mg tablets (Zentiva Pharma UK Ltd)                    | 4452041000033116  | 13402111000001101 | Nifedipine  |
| Nifedipine 5mg/5ml oral suspension                               | 5056241000033112  | 8670311000001108  | Nifedipine  |
| Nifedipine 2.5mg/5ml oral suspension                             | 5402541000033112  | 12303311000001109 | Nifedipine  |
| Neozipine XL 30mg tablets (Kent Pharma (UK) Ltd)                 | 5817441000033119  | 10751211000001100 | Nifedipine  |
| Neozipine XL 60mg tablets (Kent Pharma (UK) Ltd)                 | 5817541000033118  | 10751411000001101 | Nifedipine  |
| Adanif XL 30mg tablets (Advanz Pharma)                           | 5891941000033115  | 17666011000001106 | Nifedipine  |
| Adanif XL 60mg tablets (Advanz Pharma)                           | 5892041000033114  | 17666211000001101 | Nifedipine  |
| Nifedipine 10mg/5ml oral suspension                              | 5973741000033117  | 8670111000001106  | Nifedipine  |
| Nidef 30mg modified-release tablets (Morningside Healthcare Ltd) | 12372341000033117 | 34685211000001104 | Nifedipine  |
| Nidef 60mg modified-release tablets (Morningside Healthcare Ltd) | 12372441000033111 | 34685811000001103 | Nifedipine  |
| Nimodipine 10mg/50ml solution for infusion vials                 | 970741000033110   | 36031711000001104 | Nimodipine  |
| Nimodipine 30mg tablets                                          | 977441000033119   | 323273000         | Nimodipine  |
| Nimotop 30mg tablets (Bayer Plc)                                 | 977741000033114   | 3879211000001104  | Nimodipine  |
| Nisoldipine 10mg modified-release tablets                        | 972141000033112   | 36031811000001107 | Nisoldipine |
| Nisoldipine 20mg modified-release tablets                        | 972241000033117   | 36031911000001102 | Nisoldipine |
| Nisoldipine 30mg modified-release tablets                        | 972341000033110   | 36032011000001109 | Nisoldipine |
| Syscor MR 10 tablets (Forest Laboratories UK Ltd)                | 1401341000033110  | 3877011000001100  | Nisoldipine |
| Syscor MR 20 tablets (Forest Laboratories UK Ltd)                | 1401441000033116  | 4070011000001100  | Nisoldipine |

**Table S66. Non Dihydropyridines Aurum product codes**

| Term from EMIS                                                         | Prod code ID    | dmd ID            | Drug substance name     |
|------------------------------------------------------------------------|-----------------|-------------------|-------------------------|
| Adizem-SR 120mg capsules (Napp Pharmaceuticals Ltd)                    | 17341000033110  | 2887311000001104  | Diltiazem hydrochloride |
| Adizem-SR 180mg capsules (Napp Pharmaceuticals Ltd)                    | 17441000033116  | 2886711000001103  | Diltiazem hydrochloride |
| Adizem-SR 90mg capsules (Napp Pharmaceuticals Ltd)                     | 17641000033119  | 2887011000001102  | Diltiazem hydrochloride |
| Adizem-XL 120mg capsules (Napp Pharmaceuticals Ltd)                    | 17741000033111  | 2937811000001108  | Diltiazem hydrochloride |
| Adizem-XL 180mg capsules (Napp Pharmaceuticals Ltd)                    | 17841000033118  | 2938011000001101  | Diltiazem hydrochloride |
| Adizem-XL 240mg capsules (Napp Pharmaceuticals Ltd)                    | 17941000033114  | 2886311000001102  | Diltiazem hydrochloride |
| Adizem-XL 300mg capsules (Napp Pharmaceuticals Ltd)                    | 18041000033112  | 2886111000001104  | Diltiazem hydrochloride |
| Adizem-SR 120mg tablets (Napp Pharmaceuticals Ltd)                     | 19641000033110  | 2885611000001102  | Diltiazem hydrochloride |
| Angitil SR 90 capsules (Ethypharm UK Ltd)                              | 65341000033116  | 857011000001109   | Diltiazem hydrochloride |
| Angitil SR 120 capsules (Ethypharm UK Ltd)                             | 65441000033110  | 298811000001103   | Diltiazem hydrochloride |
| Angitil SR 180 capsules (Ethypharm UK Ltd)                             | 65541000033111  | 336611000001101   | Diltiazem hydrochloride |
| Angiozem CR 90mg tablets (Ashbourne Pharmaceuticals Ltd)               | 65941000033117  | 440711000001104   | Diltiazem hydrochloride |
| Angiozem CR 120mg tablets (Ashbourne Pharmaceuticals Ltd)              | 66041000033110  | 144811000001101   | Diltiazem hydrochloride |
| Angiozem 60mg modified-release tablets (Ashbourne Pharmaceuticals Ltd) | 71141000033114  | 672311000001103   | Diltiazem hydrochloride |
| Calcicard CR 120mg tablets (Teva UK Ltd)                               | 199241000033119 | 104111000001100   | Diltiazem hydrochloride |
| Calcicard CR 90mg tablets (Teva UK Ltd)                                | 199341000033112 | 219611000001107   | Diltiazem hydrochloride |
| Diltiazem 120mg modified-release capsules                              | 451841000033110 | 39023211000001102 | Diltiazem hydrochloride |
| Diltiazem 180mg modified-release capsules                              | 451941000033119 | 39023311000001105 | Diltiazem hydrochloride |
| Diltiazem 300mg modified-release capsules                              | 452041000033113 | 39023611000001100 | Diltiazem hydrochloride |
| Diltiazem 90mg modified-release capsules                               | 452141000033112 | 39023111000001108 | Diltiazem hydrochloride |
| Dilzem SR 60 capsules (Teva UK Ltd)                                    | 452641000033119 | 417111000001109   | Diltiazem hydrochloride |
| Dilzem SR 90 capsules (Teva UK Ltd)                                    | 452741000033111 | 682311000001105   | Diltiazem hydrochloride |
| Dilzem SR 120 capsules (Teva UK Ltd)                                   | 452841000033118 | 5711000001106     | Diltiazem hydrochloride |
| Diltiazem 60mg modified-release capsules                               | 452941000033114 | 39023011000001107 | Diltiazem hydrochloride |
| Dilzem XL 120 capsules (Teva UK Ltd)                                   | 453041000033116 | 243111000001108   | Diltiazem hydrochloride |
| Dilzem XL 180 capsules (Teva UK Ltd)                                   | 453141000033117 | 254911000001106   | Diltiazem hydrochloride |
| Dilzem XL 240 capsules (Teva UK Ltd)                                   | 453241000033112 | 733511000001107   | Diltiazem hydrochloride |
| Diltiazem 240mg modified-release capsules                              | 453741000033118 | 39023511000001104 | Diltiazem hydrochloride |
| Diltiazem 200mg modified-release capsules                              | 453941000033115 | 39023411000001103 | Diltiazem hydrochloride |

|                                                                |                  |                   |                         |
|----------------------------------------------------------------|------------------|-------------------|-------------------------|
| Diltiazem 60mg modified-release tablets                        | 454041000033118  | 39023811000001101 | Diltiazem hydrochloride |
| Diltiazem 90mg modified-release tablets                        | 458841000033115  | 39023911000001106 | Diltiazem hydrochloride |
| Diltiazem 120mg modified-release tablets                       | 459641000033113  | 39024011000001109 | Diltiazem hydrochloride |
| Slozem 120mg capsules (Zentiva Pharma UK Ltd)                  | 1346441000033111 | 130211000001109   | Diltiazem hydrochloride |
| Slozem 180mg capsules (Zentiva Pharma UK Ltd)                  | 1346541000033112 | 119211000001108   | Diltiazem hydrochloride |
| Slozem 240mg capsules (Zentiva Pharma UK Ltd)                  | 1346641000033113 | 599811000001104   | Diltiazem hydrochloride |
| Tildiem LA 300 capsules (Sanofi)                               | 1441741000033119 | 893111000001107   | Diltiazem hydrochloride |
| Tildiem LA 200 capsules (Sanofi)                               | 1441841000033112 | 261611000001107   | Diltiazem hydrochloride |
| Tildiem Retard 120mg tablets (Sanofi)                          | 1442741000033113 | 383911000001109   | Diltiazem hydrochloride |
| Tildiem Retard 90mg tablets (Sanofi)                           | 1442841000033115 | 103611000001105   | Diltiazem hydrochloride |
| Tildiem 60mg modified-release tablets (Sanofi)                 | 1443841000033113 | 762011000001102   | Diltiazem hydrochloride |
| Viazem XL 120mg capsules (Thornton & Ross Ltd)                 | 1520141000033118 | 32311000001105    | Diltiazem hydrochloride |
| Viazem XL 180mg capsules (Thornton & Ross Ltd)                 | 1520241000033113 | 33211000001108    | Diltiazem hydrochloride |
| Viazem XL 240mg capsules (Thornton & Ross Ltd)                 | 1520341000033115 | 886511000001107   | Diltiazem hydrochloride |
| Viazem XL 300mg capsules (Thornton & Ross Ltd)                 | 1520441000033114 | 407011000001105   | Diltiazem hydrochloride |
| Viazem XL 360mg capsules (Thornton & Ross Ltd)                 | 1520541000033110 | 648211000001107   | Diltiazem hydrochloride |
| Angitil XL 240 capsules (Ethypharm UK Ltd)                     | 1570441000033110 | 75111000001104    | Diltiazem hydrochloride |
| Angitil XL 300 capsules (Ethypharm UK Ltd)                     | 1570541000033111 | 467111000001105   | Diltiazem hydrochloride |
| Dilcardia SR 120mg capsules (Mylan)                            | 1602341000033116 | 723811000001107   | Diltiazem hydrochloride |
| Dilcardia SR 60mg capsules (Mylan)                             | 1602441000033110 | 937011000001101   | Diltiazem hydrochloride |
| Dilcardia SR 90mg capsules (Mylan)                             | 1602541000033111 | 353011000001101   | Diltiazem hydrochloride |
| Optil 60mg modified-release tablets (Opus Pharmaceuticals Ltd) | 1661641000033116 | 527711000001108   | Diltiazem hydrochloride |
| Diltiazem 360mg modified-release capsules                      | 1800341000033113 | 39023711000001109 | Diltiazem hydrochloride |
| Zemtard 120 XL capsules (Galen Ltd)                            | 1833041000033110 | 105211000001107   | Diltiazem hydrochloride |
| Zemtard 180 XL capsules (Galen Ltd)                            | 1833141000033114 | 813611000001103   | Diltiazem hydrochloride |
| Zemtard 240 XL capsules (Galen Ltd)                            | 1833241000033119 | 345411000001107   | Diltiazem hydrochloride |
| Zemtard 300 XL capsules (Galen Ltd)                            | 1833341000033112 | 866811000001107   | Diltiazem hydrochloride |
| Slozem 300mg capsules (Zentiva Pharma UK Ltd)                  | 2261241000033118 | 550211000001104   | Diltiazem hydrochloride |
| Adizem-XL 200mg capsules (Napp Pharmaceuticals Ltd)            | 2653341000033118 | 2886511000001108  | Diltiazem hydrochloride |
| Disogram SR 60mg capsules (Ranbaxy (UK) Ltd)                   | 2674841000033110 | 469811000001106   | Diltiazem hydrochloride |
| Disogram SR 90mg capsules (Ranbaxy (UK) Ltd)                   | 2674941000033119 | 256611000001109   | Diltiazem hydrochloride |

|                                                               |                   |                   |                         |
|---------------------------------------------------------------|-------------------|-------------------|-------------------------|
| Disogram SR 120mg capsules (Ranbaxy (UK) Ltd)                 | 2675041000033119  | 116711000001106   | Diltiazem hydrochloride |
| Disogram SR 180mg capsules (Ranbaxy (UK) Ltd)                 | 2675341000033117  | 713411000001103   | Diltiazem hydrochloride |
| Disogram SR 240mg capsules (Ranbaxy (UK) Ltd)                 | 2675641000033113  | 108711000001107   | Diltiazem hydrochloride |
| Disogram SR 300mg capsules (Ranbaxy (UK) Ltd)                 | 2676041000033111  | 34711000001104    | Diltiazem hydrochloride |
| Bi-Carzem SR 60mg capsules (Tillomed Laboratories Ltd)        | 2779141000033112  | 540011000001107   | Diltiazem hydrochloride |
| Bi-Carzem SR 90mg capsules (Tillomed Laboratories Ltd)        | 2779241000033117  | 764511000001100   | Diltiazem hydrochloride |
| Bi-Carzem SR 120mg capsules (Tillomed Laboratories Ltd)       | 2779341000033110  | 580711000001101   | Diltiazem hydrochloride |
| Diltiazem 2% cream                                            | 2920141000033113  | 8793111000001101  | Diltiazem hydrochloride |
| Zildil 90mg modified-release capsules (Healthcare Pharma Ltd) | 2952341000033113  | 200811000001104   | Diltiazem hydrochloride |
| Zildil SR 120mg capsules (Healthcare Pharma Ltd)              | 2952441000033119  | 655411000001104   | Diltiazem hydrochloride |
| Zemret 180 XL capsules (Tillomed Laboratories Ltd)            | 2955141000033116  | 924711000001109   | Diltiazem hydrochloride |
| Zemret 240 XL capsules (Tillomed Laboratories Ltd)            | 2955241000033111  | 823511000001107   | Diltiazem hydrochloride |
| Zemret 300 XL capsules (Tillomed Laboratories Ltd)            | 2955341000033118  | 640311000001101   | Diltiazem hydrochloride |
| Retalzem 60 modified-release tablets (Kent Pharma (UK) Ltd)   | 4590741000033116  | 865711000001107   | Diltiazem hydrochloride |
| Diltiazem 60mg/5ml oral suspension                            | 4953741000033114  | 8456911000001108  | Diltiazem hydrochloride |
| Bi-Carzem XL 240mg capsules (Tillomed Laboratories Ltd)       | 5816841000033119  | 884811000001103   | Diltiazem hydrochloride |
| Bi-Carzem XL 300mg capsules (Tillomed Laboratories Ltd)       | 5816941000033110  | 158411000001105   | Diltiazem hydrochloride |
| Diltiazem 2% ointment                                         | 5991841000033116  | 8793311000001104  | Diltiazem hydrochloride |
| Diltiazem 60mg/5ml oral solution                              | 5991941000033112  | 8457011000001107  | Diltiazem hydrochloride |
| Kenzem SR 60mg capsules (Kent Pharma (UK) Ltd)                | 9118241000033117  | 8885711000001100  | Diltiazem hydrochloride |
| Kenzem SR 90mg capsules (Kent Pharma (UK) Ltd)                | 9118341000033110  | 8886211000001101  | Diltiazem hydrochloride |
| Kenzem SR 120mg capsules (Kent Pharma (UK) Ltd)               | 9118441000033116  | 8886511000001103  | Diltiazem hydrochloride |
| Diltiazem 0.2% cream                                          | 13771541000033112 | 18519711000001103 | Diltiazem hydrochloride |
| Cordilox 120mg tablets (IVAX Pharmaceuticals UK Ltd)          | 374841000033119   | 867011000001103   | Verapamil hydrochloride |
| Cordilox 160mg tablets (IVAX Pharmaceuticals UK Ltd)          | 374941000033110   | 783511000001101   | Verapamil hydrochloride |
| Cordilox 40mg tablets (IVAX Pharmaceuticals UK Ltd)           | 375041000033110   | 557111000001106   | Verapamil hydrochloride |
| Cordilox 80mg tablets (IVAX Pharmaceuticals UK Ltd)           | 375141000033114   | 258911000001104   | Verapamil hydrochloride |
| Half Securon SR 120mg tablets (Mylan)                         | 660641000033112   | 846611000001102   | Verapamil hydrochloride |
| Securon IV 5mg/2ml solution for injection ampoules (Mylan)    | 1271741000033116  | 4399811000001108  | Verapamil hydrochloride |
| Securon 120mg tablets (Abbott Laboratories Ltd)               | 1274741000033119  | 140411000001109   | Verapamil hydrochloride |
| Securon SR 240mg tablets (Mylan)                              | 1275141000033117  | 540111000001108   | Verapamil hydrochloride |

|                                                               |                  |                   |                                             |
|---------------------------------------------------------------|------------------|-------------------|---------------------------------------------|
| Tarka modified-release capsules (Abbott Laboratories Ltd)     | 1406341000033117 | 3691211000001101  | Trandolapril/<br>Verapamil<br>hydrochloride |
| Univer 120mg modified-release capsules (Teva UK Ltd)          | 1489541000033117 | 219711000001103   | Verapamil<br>hydrochloride                  |
| Univer 180mg modified-release capsules (Teva UK Ltd)          | 1489641000033116 | 391811000001102   | Verapamil<br>hydrochloride                  |
| Univer 240mg modified-release capsules (Teva UK Ltd)          | 1489741000033113 | 65411000001102    | Verapamil<br>hydrochloride                  |
| Verapamil 120mg modified-release tablets                      | 1509041000033119 | 35367911000001103 | Verapamil<br>hydrochloride                  |
| Verapamil 240mg modified-release tablets                      | 1509141000033115 | 38750211000001107 | Verapamil<br>hydrochloride                  |
| Verapamil 40mg/5ml oral solution sugar free                   | 1509841000033114 | 4139411000001106  | Verapamil<br>hydrochloride                  |
| Verapamil 120mg modified-release capsules                     | 1511141000033118 | 36565011000001105 | Verapamil<br>hydrochloride                  |
| Verapamil 180mg modified-release capsules                     | 1511241000033113 | 36149411000001103 | Verapamil<br>hydrochloride                  |
| Verapamil 240mg modified-release capsules                     | 1511341000033115 | 39021011000001106 | Verapamil<br>hydrochloride                  |
| Verapamil 120mg tablets                                       | 1512941000033111 | 318206008         | Verapamil<br>hydrochloride                  |
| Verapamil 160mg tablets                                       | 1513141000033119 | 318248001         | Verapamil<br>hydrochloride                  |
| Verapamil 40mg tablets                                        | 1513241000033114 | 318204006         | Verapamil<br>hydrochloride                  |
| Verapamil 80mg tablets                                        | 1513341000033116 | 318205007         | Verapamil<br>hydrochloride                  |
| Vertab SR 240 tablets (Chiesi Ltd)                            | 1754841000033116 | 675611000001104   | Verapamil<br>hydrochloride                  |
| Verapress MR 240mg tablets (Dexcel-Pharma Ltd)                | 1833541000033117 | 525311000001101   | Verapamil<br>hydrochloride                  |
| Cordilox MR 240mg tablets (Teva UK Ltd)                       | 2129041000033118 | 740811000001102   | Verapamil<br>hydrochloride                  |
| Zolvera 40mg/5ml oral solution (Rosemont Pharmaceuticals Ltd) | 2641041000033116 | 4129511000001107  | Verapamil<br>hydrochloride                  |
| Ranvera MR 240mg tablets (Ranbaxy (UK) Ltd)                   | 2845841000033119 | 3634111000001100  | Verapamil<br>hydrochloride                  |
| Vera-Til SR 120mg tablets (Tillomed Laboratories Ltd)         | 2890641000033116 | 7418511000001104  | Verapamil<br>hydrochloride                  |
| Vera-Til SR 240mg tablets (Tillomed Laboratories Ltd)         | 2890741000033113 | 7418711000001109  | Verapamil<br>hydrochloride                  |
| Verapamil 180mg modified-release / Trandolapril 2mg capsules  | 3163041000033116 | 36149211000001102 | Trandolapril/<br>Verapamil<br>hydrochloride |
| Verapamil 5mg/2ml solution for injection ampoules             | 4260341000033110 | 36149611000001100 | Verapamil<br>hydrochloride                  |



**Table S67. Angiotensin converting enzyme inhibitors Aurum product codes**

| Term from EMIS                                             | Prod code ID     | dmd ID            | Drug substance name     |
|------------------------------------------------------------|------------------|-------------------|-------------------------|
| Ramipril 1.25mg capsules                                   | 1151341000033117 | 318900007         | Ramipril                |
| Ramipril 2.5mg capsules                                    | 1151441000033111 | 318901006         | Ramipril                |
| Ramipril 5mg capsules                                      | 1151541000033112 | 318902004         | Ramipril                |
| Tritace 1.25mg capsules (Aventis Pharma)                   | 1455541000033110 | 111611000001109   | Ramipril                |
| Tritace 2.5mg capsules (Sanofi)                            | 1455641000033111 | 835411000001105   | Ramipril                |
| Tritace 5mg capsules (Sanofi)                              | 1455741000033119 | 802311000001101   | Ramipril                |
| Ramipril 10mg capsules                                     | 1769841000033111 | 318906001         | Ramipril                |
| Tritace 10mg capsules (Sanofi)                             | 1769941000033115 | 43711000001100    | Ramipril                |
| Triapin 5mg/5mg modified-release tablets (Sanofi)          | 1834341000033110 | 3887911000001109  | Felodipine/<br>Ramipril |
| Ramipril 5mg/5ml oral suspension                           | 2883341000033118 | 8720911000001100  | Ramipril                |
| Ramipril 1.25mg tablets                                    | 2989541000033115 | 408040007         | Ramipril                |
| Ramipril 2.5mg tablets                                     | 2989641000033119 | 408050008         | Ramipril                |
| Ramipril 5mg tablets                                       | 2989741000033111 | 408051007         | Ramipril                |
| Ramipril 10mg tablets                                      | 2989841000033118 | 408052000         | Ramipril                |
| Tritace 1.25mg tablets (Sanofi)                            | 2989941000033114 | 5010511000001106  | Ramipril                |
| Tritace 2.5mg tablets (Sanofi)                             | 2990041000033116 | 5010811000001109  | Ramipril                |
| Tritace 5mg tablets (Sanofi)                               | 2990141000033117 | 5011111000001108  | Ramipril                |
| Tritace 10mg tablets (Sanofi)                              | 2990241000033112 | 5011411000001103  | Ramipril                |
| Lopace 2.5mg capsules (Discovery Pharmaceuticals)          | 3159741000033111 | 7948711000001102  | Ramipril                |
| Lopace 5mg capsules (Discovery Pharmaceuticals)            | 3159841000033118 | 7948911000001100  | Ramipril                |
| Lopace 10mg capsules (Discovery Pharmaceuticals)           | 3159941000033114 | 7949111000001105  | Ramipril                |
| Felodipine 5mg modified-release / Ramipril 5mg tablets     | 3163241000033112 | 318177008         | Felodipine/<br>Ramipril |
| Felodipine 2.5mg modified-release / Ramipril 2.5mg tablets | 3163341000033119 | 318176004         | Felodipine/<br>Ramipril |
| Ramipril 1.25mg/5ml oral suspension                        | 4152241000033113 | 8720311000001101  | Ramipril                |
| Ramipril 2.5mg/5ml oral suspension                         | 4805941000033114 | 8720711000001102  | Ramipril                |
| Ramipril 10mg/5ml oral solution                            | 5887841000033118 | 8720411000001108  | Ramipril                |
| Ramipril 10mg/5ml oral suspension                          | 5887941000033114 | 8720511000001107  | Ramipril                |
| Ramipril 5mg/5ml oral solution                             | 5890341000033110 | 8720811000001105  | Ramipril                |
| Ramipril 2.5mg/5ml oral solution                           | 5890541000033115 | 8720611000001106  | Ramipril                |
| Ramipril 1.25mg/5ml oral solution                          | 5998241000033112 | 8720211000001109  | Ramipril                |
| Ramipril 2.5mg/5ml oral solution sugar free                | 6517041000033110 | 19877111000001100 | Ramipril                |
| Triapin 2.5mg/2.5mg modified-release tablets (Sanofi)      | 8264941000033119 | 4093211000001109  | Felodipine/<br>Ramipril |
| Enalapril 10mg tablets                                     | 522641000033110  | 318853004         | Enalapril maleate       |
| Enalapril 20mg tablets                                     | 522741000033118  | 318855006         | Enalapril maleate       |
| Enalapril 5mg tablets                                      | 522841000033111  | 318851002         | Enalapril maleate       |
| Enalapril 2.5mg tablets                                    | 523541000033115  | 318850001         | Enalapril maleate       |
| Innovace 10mg tablets (Organon Pharma (UK) Ltd)            | 769041000033116  | 316111000001104   | Enalapril maleate       |

|                                                        |                   |                   |                                           |
|--------------------------------------------------------|-------------------|-------------------|-------------------------------------------|
| Innovace 2.5mg tablets (Organon Pharma (UK) Ltd)       | 769141000033117   | 749611000001107   | Enalapril maleate                         |
| Innovace 20mg tablets (Organon Pharma (UK) Ltd)        | 769241000033112   | 302311000001104   | Enalapril maleate                         |
| Innovace 5mg tablets (Organon Pharma (UK) Ltd)         | 769341000033119   | 730211000001104   | Enalapril maleate                         |
| Innozide 20mg/12.5mg tablets (Organon Pharma (UK) Ltd) | 770141000033115   | 146811000001108   | Enalapril maleate/<br>Hydrochlorothiazide |
| Pralenal 2.5 tablets (Opus Pharmaceuticals Ltd)        | 1918641000033112  | 448611000001106   | Enalapril maleate                         |
| Pralenal 5 tablets (Opus Pharmaceuticals Ltd)          | 1918741000033115  | 578511000001100   | Enalapril maleate                         |
| Pralenal 10 tablets (Opus Pharmaceuticals Ltd)         | 1918841000033113  | 761411000001101   | Enalapril maleate                         |
| Pralenal 20 tablets (Opus Pharmaceuticals Ltd)         | 1918941000033117  | 508511000001105   | Enalapril maleate                         |
| Enalapril 20mg / Hydrochlorothiazide 12.5mg tablets    | 3162241000033117  | 39691911000001109 | Enalapril maleate/<br>Hydrochlorothiazide |
| Enalapril 5mg/5ml oral suspension sugar free           | 3279241000033117  | 20092911000001108 | Enalapril maleate                         |
| Enalapril 10mg/5ml oral solution                       | 5967041000033117  | 8485711000001108  | Enalapril maleate                         |
| Enalapril 10mg/5ml oral suspension                     | 5967141000033118  | 8485811000001100  | Enalapril maleate                         |
| Enalapril 5mg/5ml oral solution                        | 5992541000033111  | 8486911000001103  | Enalapril maleate                         |
| Enalapril 5mg/5ml oral suspension                      | 5992641000033112  | 8487011000001104  | Enalapril maleate                         |
| Enalapril 1.25mg/5ml oral solution                     | 6012441000033118  | 8485511000001103  | Enalapril maleate                         |
| Enalapril 1.25mg/5ml oral suspension                   | 6012541000033117  | 8485611000001104  | Enalapril maleate                         |
| Enalapril 20mg tablets (Imported)                      | 13740241000033119 | 38955411000001109 | Enalapril maleate                         |

**Table S68. Angiotensin II receptor blocker Aurum product codes**

| Term from EMIS                                         | Prod code ID     | dmd ID            | Drug substance name                |
|--------------------------------------------------------|------------------|-------------------|------------------------------------|
| Azilsartan medoxomil 20mg tablets                      | 7754841000033119 | 20418711000001104 | Azilsartan medoxomil               |
| Azilsartan medoxomil 40mg tablets                      | 7754941000033110 | 449109006         | Azilsartan medoxomil               |
| Azilsartan medoxomil 80mg tablets                      | 7755041000033110 | 449333009         | Azilsartan medoxomil               |
| Edarbi 20mg tablets (Takeda UK Ltd)                    | 7755141000033114 | 20350911000001100 | Azilsartan medoxomil               |
| Edarbi 40mg tablets (Takeda UK Ltd)                    | 7755241000033119 | 20351211000001103 | Azilsartan medoxomil               |
| Edarbi 80mg tablets (Takeda UK Ltd)                    | 7755341000033112 | 20351811000001102 | Azilsartan medoxomil               |
| Amias 16mg tablets (Takeda UK Ltd)                     | 59141000033113   | 908511000001100   | Candesartan cilexetil              |
| Amias 2mg tablets (Takeda UK Ltd)                      | 59241000033118   | 97311000001103    | Candesartan cilexetil              |
| Amias 4mg tablets (Takeda UK Ltd)                      | 59341000033111   | 857411000001100   | Candesartan cilexetil              |
| Amias 8mg tablets (Takeda UK Ltd)                      | 59441000033117   | 36011000001106    | Candesartan cilexetil              |
| Candesartan 16mg tablets                               | 211541000033119  | 318980005         | Candesartan cilexetil              |
| Candesartan 2mg tablets                                | 211641000033118  | 318977009         | Candesartan cilexetil              |
| Candesartan 4mg tablets                                | 211741000033110  | 318978004         | Candesartan cilexetil              |
| Candesartan 8mg tablets                                | 211841000033117  | 318979007         | Candesartan cilexetil              |
| Candesartan 32mg tablets                               | 3227241000033111 | 376998003         | Candesartan cilexetil              |
| Amias 32mg tablets (Takeda UK Ltd)                     | 3227341000033118 | 8983911000001107  | Candesartan cilexetil              |
| Eprosartan 300mg tablets                               | 2036341000033115 | 318994006         | Eprosartan mesilate                |
| Eprosartan 400mg tablets                               | 2036441000033114 | 318995007         | Eprosartan mesilate                |
| Eprosartan 600mg tablets                               | 2036541000033110 | 318996008         | Eprosartan mesilate                |
| Teveten 300mg tablets (Mylan)                          | 2040841000033113 | 401211000001105   | Eprosartan mesilate                |
| Teveten 400mg tablets (Abbott Healthcare Products Ltd) | 2040941000033117 | 151411000001103   | Eprosartan mesilate                |
| Teveten 600mg tablets (Mylan)                          | 2041041000033110 | 872011000001109   | Eprosartan mesilate                |
| Aprovel 150mg tablets (Sanofi)                         | 75941000033114   | 859711000001103   | Irbesartan                         |
| Aprovel 300mg tablets (Sanofi)                         | 76041000033116   | 323211000001107   | Irbesartan                         |
| Aprovel 75mg tablets (Sanofi)                          | 76141000033117   | 434511000001104   | Irbesartan                         |
| Irbesartan 150mg tablets                               | 775441000033117  | 318969005         | Irbesartan                         |
| Irbesartan 300mg tablets                               | 775541000033116  | 318970006         | Irbesartan                         |
| Irbesartan 75mg tablets                                | 775641000033115  | 318968002         | Irbesartan                         |
| CoAprovel 150mg/12.5mg tablets (Sanofi)                | 2216141000033115 | 792411000001108   | Hydrochlorothiazide/<br>Irbesartan |
| CoAprovel 300mg/12.5mg tablets (Sanofi)                | 2216241000033110 | 682711000001109   | Hydrochlorothiazide/<br>Irbesartan |
| Irbesartan 150mg / Hydrochlorothiazide 12.5mg tablets  | 3161141000033116 | 134461004         | Hydrochlorothiazide/<br>Irbesartan |
| Irbesartan 300mg / Hydrochlorothiazide 12.5mg tablets  | 3161241000033111 | 134460003         | Hydrochlorothiazide/<br>Irbesartan |
| Irbesartan 300mg / Hydrochlorothiazide 25mg tablets    | 3995241000033112 | 10970311000001105 | Hydrochlorothiazide/<br>Irbesartan |
| CoAprovel 300mg/25mg tablets (Sanofi)                  | 3995341000033119 | 10968611000001106 | Hydrochlorothiazide/<br>Irbesartan |
| Irbesartan 300mg/5ml oral suspension                   | 4954341000033111 | 12639511000001103 | Irbesartan                         |

|                                                                |                  |                   |                                              |
|----------------------------------------------------------------|------------------|-------------------|----------------------------------------------|
| Irbesartan 150mg/5ml oral suspension                           | 5970641000033117 | 8580811000001101  | Irbesartan                                   |
| Irbesartan 37.5mg oral powder sachets                          | 6435741000033117 | 19481911000001105 | Irbesartan                                   |
| Ifirmasta 75mg tablets (Consilient Health Ltd)                 | 8554141000033116 | 22720311000001108 | Irbesartan                                   |
| Ifirmasta 150mg tablets (Consilient Health Ltd)                | 8554241000033111 | 22720611000001103 | Irbesartan                                   |
| Ifirmasta 300mg tablets (Consilient Health Ltd)                | 8554341000033118 | 22720811000001104 | Irbesartan                                   |
| Cozaar 25mg tablets (Organon Pharma (UK) Ltd)                  | 370441000033112  | 266511000001104   | Losartan potassium                           |
| Cozaar 50mg tablets (Organon Pharma (UK) Ltd)                  | 370541000033113  | 53611000001106    | Losartan potassium                           |
| Cozaar-Comp 50mg/12.5mg tablets (Organon Pharma (UK) Ltd)      | 370841000033110  | 255911000001105   | Hydrochlorothiazide/<br>Losartan potassium   |
| Losartan 25mg tablets                                          | 851841000033117  | 318955005         | Losartan potassium                           |
| Losartan 50mg tablets                                          | 851941000033113  | 318956006         | Losartan potassium                           |
| Losartan 100mg tablets                                         | 2720141000033115 | 407784004         | Losartan potassium                           |
| Cozaar 100mg tablets (Organon Pharma (UK) Ltd)                 | 2720241000033110 | 245811000001102   | Losartan potassium                           |
| Losartan 50mg / Hydrochlorothiazide 12.5mg tablets             | 3161741000033117 | 318959004         | Hydrochlorothiazide/<br>Losartan potassium   |
| Losartan 100mg / Hydrochlorothiazide 25mg tablets              | 3346841000033117 | 395497004         | Hydrochlorothiazide/<br>Losartan potassium   |
| Cozaar-Comp 100mg/25mg tablets (Organon Pharma (UK) Ltd)       | 3346941000033113 | 9566911000001105  | Hydrochlorothiazide/<br>Losartan potassium   |
| Losartan 100mg / Hydrochlorothiazide 12.5mg tablets            | 4424741000033110 | 13112711000001103 | Hydrochlorothiazide/<br>Losartan potassium   |
| Cozaar-Comp 100mg/12.5mg tablets (Organon Pharma (UK) Ltd)     | 4424841000033117 | 13094111000001102 | Hydrochlorothiazide/<br>Losartan potassium   |
| Losartan 12.5mg tablets                                        | 4957541000033114 | 15148111000001100 | Losartan potassium                           |
| Cozaar 12.5mg tablets (Organon Pharma (UK) Ltd)                | 4957641000033110 | 15138911000001101 | Losartan potassium                           |
| Losartan 2.5mg/ml oral suspension sugar free                   | 5149941000033118 | 15507411000001105 | Losartan potassium                           |
| Cozaar 2.5mg/ml oral suspension (Organon Pharma (UK) Ltd)      | 5150041000033110 | 15506811000001105 | Losartan potassium                           |
| Losartan 100mg/5ml oral solution                               | 5971741000033116 | 15451111000001107 | Losartan potassium                           |
| Losartan 100mg/5ml oral suspension                             | 5971841000033114 | 15451211000001101 | Losartan potassium                           |
| Losartan 50mg/5ml oral solution                                | 5971941000033118 | 14159411000001106 | Losartan potassium                           |
| Losartan 50mg/5ml oral suspension                              | 5972041000033112 | 14159511000001105 | Losartan potassium                           |
| Olmesartan medoxomil 10mg tablets                              | 2944541000033111 | 408055003         | Olmesartan medoxomil                         |
| Olmesartan medoxomil 20mg tablets                              | 2944641000033112 | 385542009         | Olmesartan medoxomil                         |
| Olmesartan medoxomil 40mg tablets                              | 2944741000033115 | 385543004         | Olmesartan medoxomil                         |
| Olmotec 10mg tablets (Daiichi Sankyo UK Ltd)                   | 2944841000033113 | 4624011000001101  | Olmesartan medoxomil                         |
| Olmotec 20mg tablets (Daiichi Sankyo UK Ltd)                   | 2944941000033117 | 4624311000001103  | Olmesartan medoxomil                         |
| Olmotec 40mg tablets (Daiichi Sankyo UK Ltd)                   | 2945041000033117 | 4624611000001108  | Olmesartan medoxomil                         |
| Olmesartan medoxomil 20mg / Hydrochlorothiazide 12.5mg tablets | 3908941000033112 | 409184002         | Hydrochlorothiazide/<br>Olmesartan medoxomil |
| Olmesartan medoxomil 20mg / Hydrochlorothiazide 25mg tablets   | 3909041000033115 | 10270711000001105 | Hydrochlorothiazide/<br>Olmesartan medoxomil |

|                                                                |                  |                   |                                                                         |
|----------------------------------------------------------------|------------------|-------------------|-------------------------------------------------------------------------|
| Olmotec Plus 20mg/12.5mg tablets (Daiichi Sankyo UK Ltd)       | 3909141000033116 | 10261511000001103 | Hydrochlorothiazide/<br>Olmesartan<br>medoxomil                         |
| Olmotec Plus 20mg/25mg tablets (Daiichi Sankyo UK Ltd)         | 3909241000033111 | 10261811000001100 | Hydrochlorothiazide/<br>Olmesartan<br>medoxomil                         |
| Olmesartan medoxomil 10mg/5ml oral suspension                  | 4273241000033118 | 14680711000001103 | Olmesartan<br>medoxomil                                                 |
| Olmesartan medoxomil 20mg / Amlodipine 5mg tablets             | 5005841000033114 | 429502004         | Amlodipine besilate/<br>Olmesartan<br>medoxomil                         |
| Olmesartan medoxomil 40mg / Amlodipine 5mg tablets             | 5005941000033118 | 429503009         | Amlodipine besilate/<br>Olmesartan<br>medoxomil                         |
| Olmesartan medoxomil 40mg / Amlodipine 10mg tablets            | 5006041000033111 | 429678006         | Amlodipine besilate/<br>Olmesartan<br>medoxomil                         |
| Sevikar 20mg/5mg tablets (Daiichi Sankyo UK Ltd)               | 5006141000033110 | 15773211000001105 | Amlodipine besilate/<br>Olmesartan<br>medoxomil                         |
| Sevikar 40mg/5mg tablets (Daiichi Sankyo UK Ltd)               | 5006241000033115 | 15772911000001108 | Amlodipine besilate/<br>Olmesartan<br>medoxomil                         |
| Sevikar 40mg/10mg tablets (Daiichi Sankyo UK Ltd)              | 5006341000033113 | 15772611000001102 | Amlodipine besilate/<br>Olmesartan<br>medoxomil                         |
| Olmesartan medoxomil 40mg / Hydrochlorothiazide 12.5mg tablets | 5566341000033111 | 409185001         | Hydrochlorothiazide/<br>Olmesartan<br>medoxomil                         |
| Olmotec Plus 40mg/12.5mg tablets (Daiichi Sankyo UK Ltd)       | 5566441000033117 | 17220911000001102 | Hydrochlorothiazide/<br>Olmesartan<br>medoxomil                         |
| Sevikar HCT 20mg/5mg/12.5mg tablets (Daiichi Sankyo UK Ltd)    | 6180641000033112 | 18986411000001108 | Amlodipine besilate/<br>Hydrochlorothiazide/<br>Olmesartan<br>medoxomil |
| Sevikar HCT 40mg/5mg/12.5mg tablets (Daiichi Sankyo UK Ltd)    | 6180741000033115 | 18986711000001102 | Amlodipine besilate/<br>Hydrochlorothiazide/<br>Olmesartan<br>medoxomil |
| Sevikar HCT 40mg/10mg/12.5mg tablets (Daiichi Sankyo UK Ltd)   | 6180841000033113 | 18987011000001101 | Amlodipine besilate/<br>Hydrochlorothiazide/<br>Olmesartan<br>medoxomil |
| Sevikar HCT 40mg/5mg/25mg tablets (Daiichi Sankyo UK Ltd)      | 6180941000033117 | 18987311000001103 | Amlodipine besilate/<br>Hydrochlorothiazide/<br>Olmesartan<br>medoxomil |
| Sevikar HCT 40mg/10mg/25mg tablets (Daiichi Sankyo UK Ltd)     | 6181041000033110 | 18987611000001108 | Amlodipine besilate/<br>Hydrochlorothiazide/<br>Olmesartan<br>medoxomil |
| Diovan 160mg capsules (Novartis Pharmaceuticals UK Ltd)        | 437641000033118  | 117011000001107   | Valsartan                                                               |
| Diovan 40mg capsules (Novartis Pharmaceuticals UK Ltd)         | 437741000033110  | 777611000001101   | Valsartan                                                               |
| Diovan 80mg capsules (Novartis Pharmaceuticals UK Ltd)         | 437841000033117  | 554511000001105   | Valsartan                                                               |
| Valsartan 160mg capsules                                       | 1498241000033111 | 318963006         | Valsartan                                                               |
| Valsartan 40mg capsules                                        | 1498341000033118 | 318961008         | Valsartan                                                               |
| Valsartan 80mg capsules                                        | 1498441000033112 | 318962001         | Valsartan                                                               |

|                                                                  |                   |                   |                                   |
|------------------------------------------------------------------|-------------------|-------------------|-----------------------------------|
| Co-Diovan 160mg/12.5mg tablets (Novartis Pharmaceuticals UK Ltd) | 3152541000033112  | 7668611000001104  | Hydrochlorothiazide/<br>Valsartan |
| Co-Diovan 160mg/25mg tablets (Novartis Pharmaceuticals UK Ltd)   | 3152641000033113  | 7668911000001105  | Hydrochlorothiazide/<br>Valsartan |
| Valsartan 160mg / Hydrochlorothiazide 12.5mg tablets             | 3161441000033112  | 395521005         | Hydrochlorothiazide/<br>Valsartan |
| Valsartan 160mg / Hydrochlorothiazide 25mg tablets               | 3161541000033113  | 409298002         | Hydrochlorothiazide/<br>Valsartan |
| Valsartan 80mg / Hydrochlorothiazide 12.5mg tablets              | 3190741000033112  | 377488008         | Hydrochlorothiazide/<br>Valsartan |
| Co-Diovan 80mg/12.5mg tablets (Novartis Pharmaceuticals UK Ltd)  | 3190841000033119  | 8150111000001108  | Hydrochlorothiazide/<br>Valsartan |
| Valsartan 40mg tablets                                           | 3201341000033115  | 416515008         | Valsartan                         |
| Diovan 40mg tablets (Novartis Pharmaceuticals UK Ltd)            | 3201441000033114  | 8263211000001101  | Valsartan                         |
| Amlodipine 5mg / Valsartan 80mg tablets                          | 4021441000033114  | 11160311000001109 | Amlodipine besilate/<br>Valsartan |
| Amlodipine 5mg / Valsartan 160mg tablets                         | 4021541000033110  | 11160211000001101 | Amlodipine besilate/<br>Valsartan |
| Amlodipine 10mg / Valsartan 160mg tablets                        | 4021641000033111  | 11160111000001107 | Amlodipine besilate/<br>Valsartan |
| Exforge 5mg/80mg tablets (Novartis Pharmaceuticals UK Ltd)       | 4021741000033119  | 11161811000001108 | Amlodipine besilate/<br>Valsartan |
| Exforge 5mg/160mg tablets (Novartis Pharmaceuticals UK Ltd)      | 4021841000033112  | 11161511000001105 | Amlodipine besilate/<br>Valsartan |
| Exforge 10mg/160mg tablets (Novartis Pharmaceuticals UK Ltd)     | 4021941000033116  | 11160711000001108 | Amlodipine besilate/<br>Valsartan |
| Valsartan 320mg tablets                                          | 4424941000033113  | 376487009         | Valsartan                         |
| Diovan 320mg tablets (Novartis Pharmaceuticals UK Ltd)           | 4425041000033113  | 13143311000001102 | Valsartan                         |
| Valsartan 80mg tablets                                           | 6515441000033113  | 375034009         | Valsartan                         |
| Valsartan 160mg tablets                                          | 6515541000033114  | 375035005         | Valsartan                         |
| Valsartan 3mg/ml oral solution                                   | 6528441000033113  | 20007411000001100 | Valsartan                         |
| Diovan 3mg/1ml oral solution (Novartis Pharmaceuticals UK Ltd)   | 6528541000033114  | 20001711000001102 | Valsartan                         |
| Sacubitril 24mg / Valsartan 26mg tablets                         | 10943641000033117 | 31142011000001103 | Sacubitril/ Valsartan             |
| Sacubitril 49mg / Valsartan 51mg tablets                         | 10943741000033114 | 31142111000001102 | Sacubitril/ Valsartan             |
| Sacubitril 97mg / Valsartan 103mg tablets                        | 10943841000033116 | 31142211000001108 | Sacubitril/ Valsartan             |
| Entresto 24mg/26mg tablets (Novartis Pharmaceuticals UK Ltd)     | 10943941000033112 | 31136811000001109 | Sacubitril/ Valsartan             |
| Entresto 49mg/51mg tablets (Novartis Pharmaceuticals UK Ltd)     | 10944041000033114 | 31136411000001107 | Sacubitril/ Valsartan             |
| Entresto 97mg/103mg tablets (Novartis Pharmaceuticals UK Ltd)    | 10944141000033113 | 31138011000001104 | Sacubitril/ Valsartan             |

**Table S69. Beta blockers Aurum product codes**

| Term from EMIS                                         | Prod code ID     | dmd ID           | Drug substance name      |
|--------------------------------------------------------|------------------|------------------|--------------------------|
| Sotalol 25mg/5ml oral solution                         | 3953441000033116 | 8726811000001107 | Sotalol hydrochloride    |
| Sotalol 25mg/5ml oral suspension                       | 9776441000033119 | 8726911000001102 | Sotalol hydrochloride    |
| Acebutolol 100mg capsules                              | 3041000033115    | 318412000        | Acebutolol hydrochloride |
| Sectral 100mg capsules (Sanofi)                        | 1268141000033119 | 632811000001105  | Acebutolol hydrochloride |
| Sectral 200mg capsules (Sanofi)                        | 1268241000033114 | 925711000001108  | Acebutolol hydrochloride |
| Acebutolol 200mg capsules                              | 3141000033116    | 318413005        | Acebutolol hydrochloride |
| Acebutolol 400mg tablets                               | 10741000033112   | 318414004        | Acebutolol hydrochloride |
| Sectral 400mg tablets (Sanofi)                         | 1278241000033118 | 298111000001105  | Acebutolol hydrochloride |
| Atenix 50 tablets (Ashbourne Pharmaceuticals Ltd)      | 92541000033118   | 271911000001106  | Atenolol                 |
| Tenormin LS 50mg tablets (AstraZeneca UK Ltd)          | 1426541000033115 | 423911000001107  | Atenolol                 |
| Antipressan 50mg tablets (Teva UK Ltd)                 | 71041000033110   | 874711000001101  | Atenolol                 |
| Atenolol 50mg tablets                                  | 91141000033119   | 318420003        | Atenolol                 |
| Atenolol 100mg tablets                                 | 91041000033118   | 318421004        | Atenolol                 |
| Antipressan 100mg tablets (Teva UK Ltd)                | 70941000033117   | 734011000001102  | Atenolol                 |
| Atenix 100 tablets (Ashbourne Pharmaceuticals Ltd)     | 90541000033117   | 181611000001107  | Atenolol                 |
| Tenormin 100mg tablets (AstraZeneca UK Ltd)            | 1426441000033116 | 162411000001102  | Atenolol                 |
| Tenormin 25mg tablets (AstraZeneca UK Ltd)             | 1428741000033112 | 317111000001101  | Atenolol                 |
| Atenix 25 tablets (Ashbourne Pharmaceuticals Ltd)      | 91841000033113   | 482511000001101  | Atenolol                 |
| Antipressan 25mg tablets (Teva UK Ltd)                 | 69441000033112   | 877011000001106  | Atenolol                 |
| Atenolol 25mg tablets                                  | 90641000033116   | 318434003        | Atenolol                 |
| Betaloc 100mg tablets (AstraZeneca UK Ltd)             | 144341000033117  | 193911000001101  | Metoprolol tartrate      |
| Lopresor 100mg tablets (Recordati Pharmaceuticals Ltd) | 850841000033110  | 756911000001107  | Metoprolol tartrate      |
| Metoprolol 100mg tablets                               | 897741000033111  | 318474009        | Metoprolol tartrate      |
| Metoprolol 50mg tablets                                | 897841000033118  | 318475005        | Metoprolol tartrate      |
| Betaloc 50mg tablets (AstraZeneca UK Ltd)              | 144441000033111  | 31811000001105   | Metoprolol tartrate      |
| Lopresor 50mg tablets (Recordati Pharmaceuticals Ltd)  | 850941000033119  | 113511000001109  | Metoprolol tartrate      |
| Corgard 40mg tablets (Sanofi-Synthelabo Ltd)           | 375241000033119  | 3686511000001108 | Nadolol                  |
| Nadolol 40mg tablets                                   | 956341000033113  | 318480001        | Nadolol                  |
| Nadolol 80mg tablets                                   | 956541000033118  | 318481002        | Nadolol                  |
| Corgard 80mg tablets (Sanofi)                          | 375341000033112  | 3687411000001106 | Nadolol                  |
| Trasicor 20mg tablets (Amdipharm Plc)                  | 1469641000033119 | 3379011000001106 | Oxprenolol hydrochloride |
| Oxprenolol 20mg tablets                                | 1026141000033119 | 318483004        | Oxprenolol hydrochloride |
| Oxprenolol 40mg tablets                                | 1026241000033114 | 318484005        | Oxprenolol hydrochloride |
| Trasicor 40mg tablets (Amdipharm Plc)                  | 1469741000033111 | 592911000001104  | Oxprenolol hydrochloride |

|                                                                  |                  |                  |                                                                     |
|------------------------------------------------------------------|------------------|------------------|---------------------------------------------------------------------|
| Trasicor 80mg tablets (Amdipharm Plc)                            | 1469841000033118 | 568511000001106  | Oxprenolol hydrochloride                                            |
| Oxprenolol 80mg tablets                                          | 1026341000033116 | 318485006        | Oxprenolol hydrochloride                                            |
| Pindolol 5mg tablets                                             | 1091241000033112 | 318512002        | Pindolol                                                            |
| Visken 5mg tablets (Advanz Pharma)                               | 1524041000033111 | 3706111000001105 | Pindolol                                                            |
| Visken 15mg tablets (Advanz Pharma)                              | 1525141000033111 | 3887411000001101 | Pindolol                                                            |
| Pindolol 15mg tablets                                            | 1091141000033117 | 318513007        | Pindolol                                                            |
| Sotalol 40mg tablets                                             | 1367441000033117 | 318525005        | Sotalol hydrochloride                                               |
| Beta-Cardone 40mg tablets (Focus Pharmaceuticals Ltd)            | 144041000033119  | 900511000001103  | Sotalol hydrochloride                                               |
| Sotacor 80mg tablets (Cheplapharm Arzneimittel GmbH)             | 1366141000033111 | 463811000001109  | Sotalol hydrochloride                                               |
| Beta-Cardone 80mg tablets (Focus Pharmaceuticals Ltd)            | 144141000033115  | 104011000001101  | Sotalol hydrochloride                                               |
| Sotalol 80mg tablets                                             | 1367541000033116 | 318526006        | Sotalol hydrochloride                                               |
| Sotalol 200mg tablets                                            | 1367241000033118 | 318527002        | Sotalol hydrochloride                                               |
| Beta-Cardone 200mg tablets (Advanz Pharma)                       | 143941000033116  | 447111000001104  | Sotalol hydrochloride                                               |
| Sotacor 160mg tablets (Bristol-Myers Squibb Pharmaceuticals Ltd) | 1366041000033112 | 446211000001108  | Sotalol hydrochloride                                               |
| Sotalol 160mg tablets                                            | 1367141000033113 | 318528007        | Sotalol hydrochloride                                               |
| Timolol 10mg tablets                                             | 1444541000033113 | 318534000        | Timolol maleate                                                     |
| Betim 10mg tablets (Meda Pharmaceuticals Ltd)                    | 144741000033116  | 72811000001104   | Timolol maleate                                                     |
| Co-Betaloc tablets (Pfizer Ltd)                                  | 372741000033116  | 2977611000001106 | Hydrochlorothiazide/<br>Metoprolol tartrate                         |
| Metoprolol 100mg / Hydrochlorothiazide 12.5mg tablets            | 3161341000033118 | 318546001        | Hydrochlorothiazide/<br>Metoprolol tartrate                         |
| Corgaretic 40mg tablets (Sanofi-Synthelabo Ltd)                  | 375441000033118  | 3886211000001102 | Bendroflumethiazide/<br>Nadolol                                     |
| Corgaretic 80mg tablets (Sanofi-Synthelabo Ltd)                  | 375541000033117  | 4057911000001102 | Bendroflumethiazide/<br>Nadolol                                     |
| Viskaldix tablets (Advanz Pharma)                                | 1523941000033114 | 3638411000001101 | Cloпамide/ Pindolol                                                 |
| Pindolol 10mg / Cloпамide 5mg tablets                            | 3163141000033117 | 318552000        | Cloпамide/ Pindolol                                                 |
| Moducren tablets (Merck Sharp & Dohme Ltd)                       | 935341000033118  | 74311000001101   | Amiloride hydrochloride/<br>Hydrochlorothiazide/<br>Timolol maleate |
| Prestim tablets (Meda Pharmaceuticals Ltd)                       | 1132741000033111 | 98411000001109   | Bendroflumethiazide/<br>Timolol maleate                             |
| Timolol 10mg / Bendroflumethiazide 2.5mg tablets                 | 3346641000033118 | 318556002        | Bendroflumethiazide/<br>Timolol maleate                             |
| Tenben 25mg/1.25mg capsules (Galen Ltd)                          | 1414241000033117 | 721411000001106  | Atenolol/<br>Bendroflumethiazide                                    |
| Tenoret 50mg/12.5mg tablets (AstraZeneca UK Ltd)                 | 1426241000033117 | 825011000001103  | Atenolol/<br>Chlortalidone                                          |
| Tenchlor 50mg/12.5mg tablets (Teva UK Ltd)                       | 1425441000033113 | 439411000001104  | Atenolol/<br>Chlortalidone                                          |
| Atenix Co 50 tablets (Ashbourne Pharmaceuticals Ltd)             | 92441000033119   | 629011000001109  | Atenolol/<br>Chlortalidone                                          |
| Co-tenidone 50mg/12.5mg tablets                                  | 376441000033110  | 318575007        | Atenolol/<br>Chlortalidone                                          |
| Secadrex 200mg/12.5mg tablets (Sanofi)                           | 1274641000033111 | 878911000001106  | Acebutolol hydrochloride/<br>Hydrochlorothiazide                    |
| Acebutolol 200mg / Hydrochlorothiazide 12.5mg tablets            | 3162941000033114 | 318586009        | Acebutolol hydrochloride/<br>Hydrochlorothiazide                    |



|                                                                                             |                   |                   |                                                              |
|---------------------------------------------------------------------------------------------|-------------------|-------------------|--------------------------------------------------------------|
| Kalten capsules (M & A Pharmachem Ltd)                                                      | 793741000033117   | 237011000001100   | Amiloride hydrochloride/<br>Atenolol/<br>Hydrochlorothiazide |
| Celectol 200mg tablets (Cheplapharm Arzneimittel GmbH)                                      | 236141000033110   | 864811000001100   | Celiprolol hydrochloride                                     |
| Celiprolol 200mg tablets                                                                    | 236041000033111   | 318619000         | Celiprolol hydrochloride                                     |
| Celiprolol 400mg tablets                                                                    | 233341000033116   | 318622003         | Celiprolol hydrochloride                                     |
| Celectol 400mg tablets (Cheplapharm Arzneimittel GmbH)                                      | 233241000033114   | 479211000001100   | Celiprolol hydrochloride                                     |
| Eucardic 12.5mg tablets (Roche Products Ltd)                                                | 556941000033118   | 334711000001101   | Carvedilol                                                   |
| Carvedilol 12.5mg tablets                                                                   | 209941000033111   | 318631003         | Carvedilol                                                   |
| Carvedilol 25mg tablets                                                                     | 210041000033115   | 318632005         | Carvedilol                                                   |
| Eucardic 25mg tablets (Roche Products Ltd)                                                  | 557041000033117   | 709911000001107   | Carvedilol                                                   |
| Eucardic 3.125mg tablets (Roche Products Ltd)                                               | 1608941000033115  | 873111000001104   | Carvedilol                                                   |
| Carvedilol 3.125mg tablets                                                                  | 1581241000033110  | 318633000         | Carvedilol                                                   |
| Carvedilol 6.25mg tablets                                                                   | 1581341000033117  | 318635007         | Carvedilol                                                   |
| Eucardic 6.25mg tablets (Roche Products Ltd)                                                | 1609041000033112  | 690511000001101   | Carvedilol                                                   |
| Nadolol 40mg/5ml oral suspension                                                            | 5378241000033112  | 12300811000001107 | Nadolol                                                      |
| Tenormin 25mg/5ml syrup (AstraZeneca UK Ltd)                                                | 1424541000033110  | 373311000001100   | Atenolol                                                     |
| Atenolol 25mg/5ml oral solution sugar free                                                  | 90441000033118    | 35903211000001107 | Atenolol                                                     |
| Tenif 50mg/20mg modified-release capsules (AstraZeneca UK Ltd)                              | 1414941000033114  | 3142511000001102  | Atenolol/ Nifedipine                                         |
| Beta-Adalat modified-release capsules (Bayer Plc)                                           | 124341000033119   | 3142711000001107  | Atenolol/ Nifedipine                                         |
| Atenolol 50mg / Nifedipine 20mg modified-release capsules                                   | 3246941000033118  | 35903311000001104 | Atenolol/ Nifedipine                                         |
| Tenormin 5mg/10ml solution for injection ampoules (AstraZeneca UK Ltd)                      | 1420741000033114  | 9111000001107     | Atenolol                                                     |
| Atenolol 5mg/10ml solution for injection ampoules                                           | 89541000033111    | 35903411000001106 | Atenolol                                                     |
| Metoprolol 5mg/5ml solution for injection ampoules                                          | 887141000033113   | 3631211000001109  | Metoprolol tartrate                                          |
| Betaloc I.V. 5mg/5ml solution for injection ampoules (Recordati Pharmaceuticals Ltd)        | 131141000033116   | 3615711000001109  | Metoprolol tartrate                                          |
| Sotalol 40mg/4ml solution for injection ampoules (Bristol-Myers Squibb Pharmaceuticals Ltd) | 1358541000033113  | 694711000001100   | Sotalol hydrochloride                                        |
| Sotalol 40mg/4ml solution for injection ampoules                                            | 2908541000033114  | 35930811000001109 | Sotalol hydrochloride                                        |
| Slow-Trasicor 160mg tablets (Advanz Pharma)                                                 | 1347441000033114  | 473011000001107   | Oxprenolol hydrochloride                                     |
| Oxprenolol 160mg modified-release tablets                                                   | 1026041000033118  | 36023011000001102 | Oxprenolol hydrochloride                                     |
| Co-Betaloc SA tablets (Pfizer Ltd)                                                          | 372841000033114   | 3853411000001104  | Hydrochlorothiazide/<br>Metoprolol tartrate                  |
| Lopresor SR 200mg tablets (Recordati Pharmaceuticals Ltd)                                   | 851041000033112   | 916111000001108   | Metoprolol tartrate                                          |
| Betaloc-SA 200mg tablets (AstraZeneca UK Ltd)                                               | 144541000033112   | 185111000001102   | Metoprolol tartrate                                          |
| Metoprolol 200mg modified-release tablets                                                   | 891641000033111   | 36035411000001108 | Metoprolol tartrate                                          |
| Nadolol 30mg/5ml oral solution                                                              | 7871341000033114  | 16109911000001102 | Nadolol                                                      |
| Nadolol 30mg/5ml oral suspension                                                            | 10650141000033117 | 16110011000001107 | Nadolol                                                      |

|                                                                                            |                   |                   |                                                                     |
|--------------------------------------------------------------------------------------------|-------------------|-------------------|---------------------------------------------------------------------|
| Nadolol 20mg/5ml oral solution                                                             | 5814141000033119  | 16130911000001101 | Nadolol                                                             |
| Nadolol 20mg/5ml oral suspension                                                           | 10650041000033116 | 16131011000001109 | Nadolol                                                             |
| Timolol 10mg / Amiloride 2.5mg / Hydrochlorothiazide 25mg tablets (Essential Generics Ltd) | 5376441000033114  | 16458411000001107 | Amiloride hydrochloride/<br>Hydrochlorothiazide/<br>Timolol maleate |
| Co-tenidone 100mg/25mg tablets                                                             | 376541000033111   | 377211005         | Atenolol/<br>Chlortalidone                                          |
| Atenix Co 100 tablets (Ashbourne Pharmaceuticals Ltd)                                      | 90741000033113    | 101411000001108   | Atenolol/<br>Chlortalidone                                          |
| Tenoretic 100mg/25mg tablets (AstraZeneca UK Ltd)                                          | 1426341000033110  | 288711000001105   | Atenolol/<br>Chlortalidone                                          |
| Tenchlor 100mg/25mg tablets (Teva UK Ltd)                                                  | 1425541000033114  | 298311000001107   | Atenolol/<br>Chlortalidone                                          |
| Trasidrex modified-release tablets (Mercury Pharma Group Ltd)                              | 1469941000033114  | 3444411000001107  | Cyclopentiazide/<br>Oxprenolol hydrochloride                        |
| Co-prenozide 160mg/0.25mg modified-release tablets                                         | 377341000033119   | 36091611000001101 | Cyclopentiazide/<br>Oxprenolol hydrochloride                        |
| Carvedilol 5mg/5ml oral suspension                                                         | 5288741000033116  | 8356811000001107  | Carvedilol                                                          |
| Metoprolol 12.5mg/5ml oral solution                                                        | 2616041000033116  | 8668211000001107  | Metoprolol tartrate                                                 |
| Metoprolol 12.5mg/5ml oral suspension                                                      | 4815641000033117  | 8668411000001106  | Metoprolol tartrate                                                 |
| Metoprolol 25mg/5ml oral solution                                                          | 5575541000033119  | 8668711000001100  | Metoprolol tartrate                                                 |
| Metoprolol 50mg/5ml oral solution                                                          | 5972841000033117  | 8668911000001103  | Metoprolol tartrate                                                 |
| Metoprolol 50mg/5ml oral suspension                                                        | 5972941000033113  | 8669111000001108  | Metoprolol tartrate                                                 |

**Table S70. Alpha blockers Aurum product codes**

| Term from EMIS                                                                   | Prod code ID      | dmd ID            | Drug substance name                 |
|----------------------------------------------------------------------------------|-------------------|-------------------|-------------------------------------|
| Cardura 1mg tablets (Upjohn UK Ltd)                                              | 216741000033115   | 907711000001109   | Doxazosin mesilate                  |
| Cardura 2mg tablets (Upjohn UK Ltd)                                              | 216841000033113   | 41811000001109    | Doxazosin mesilate                  |
| Doxazosin 1mg tablets                                                            | 480641000033111   | 318781001         | Doxazosin mesilate                  |
| Doxazosin 2mg tablets                                                            | 480741000033119   | 318782008         | Doxazosin mesilate                  |
| Doxazosin 4mg tablets                                                            | 480841000033112   | 318783003         | Doxazosin mesilate                  |
| Doxazosin 4mg modified-release tablets                                           | 2273841000033111  | 39020411000001106 | Doxazosin mesilate                  |
| Doxazosin 8mg modified-release tablets                                           | 2273941000033115  | 39021111000001107 | Doxazosin mesilate                  |
| Cardura XL 4mg tablets (Upjohn UK Ltd)                                           | 2274041000033118  | 123911000001106   | Doxazosin mesilate                  |
| Cardura XL 8mg tablets (Upjohn UK Ltd)                                           | 2274141000033119  | 873411000001109   | Doxazosin mesilate                  |
| Cascor 2mg tablets (Ranbaxy (UK) Ltd)                                            | 2760041000033110  | 904511000001107   | Doxazosin mesilate                  |
| Cascor 4mg tablets (Ranbaxy (UK) Ltd)                                            | 2760141000033114  | 179311000001107   | Doxazosin mesilate                  |
| Doxadura 1mg tablets (Dexcel-Pharma Ltd)                                         | 2957941000033110  | 4857511000001108  | Doxazosin mesilate                  |
| Doxadura 2mg tablets (Dexcel-Pharma Ltd)                                         | 2958041000033113  | 4857711000001103  | Doxazosin mesilate                  |
| Doxadura 4mg tablets (Dexcel-Pharma Ltd)                                         | 2958141000033112  | 4858111000001103  | Doxazosin mesilate                  |
| Slocinx XL 4mg tablets (Zentiva Pharma UK Ltd)                                   | 4021141000033118  | 11098311000001104 | Doxazosin mesilate                  |
| Doxadura XL 4mg tablets (Dexcel-Pharma Ltd)                                      | 4063741000033112  | 11269911000001101 | Doxazosin mesilate                  |
| Oxandosin XL 4mg tablets (Ratiopharm UK Ltd)                                     | 4288341000033111  | 11812211000001105 | Doxazosin mesilate                  |
| Doxazosin 1mg/5ml oral suspension                                                | 4432941000033119  | 8483411000001101  | Doxazosin mesilate                  |
| Doxzogen XL 4mg tablets (Mylan)                                                  | 4575941000033115  | 13811611000001108 | Doxazosin mesilate                  |
| Cardozin XL 4mg tablets (Almus Pharmaceuticals Ltd)                              | 4936841000033112  | 18197411000001107 | Doxazosin mesilate                  |
| Doxazosin 4mg/5ml oral suspension                                                | 5138341000033111  | 8483511000001102  | Doxazosin mesilate                  |
| Colixil XL 4mg tablets (Sandoz Ltd)                                              | 5403641000033117  | 11757711000001107 | Doxazosin mesilate                  |
| Larbex XL 4mg tablets (Teva UK Ltd)                                              | 5809641000033111  | 17338211000001104 | Doxazosin mesilate                  |
| Raporsin XL 4mg tablets (Accord Healthcare Ltd)                                  | 6036141000033119  | 18164911000001108 | Doxazosin mesilate                  |
| Doxazosin 4mg/5ml oral solution                                                  | 8870641000033119  | 23466611000001105 | Doxazosin mesilate                  |
| Doxazosin 1mg/5ml oral solution                                                  | 9173941000033111  | 24509711000001103 | Doxazosin mesilate                  |
| Doxazosin 8mg tablets                                                            | 12682141000033115 | 421069003         | Doxazosin mesilate                  |
| Rogitine 10mg/1ml solution for injection ampoules (Alliance Pharmaceuticals Ltd) | 1180941000033115  | 4078811000001109  | Phentolamine mesilate               |
| Invicorp 1 solution for injection (Senetek Plc)                                  | 1619941000033111  | 5048711000001108  | Aviptadil/<br>Phentolamine mesilate |

|                                                                                         |                   |                   |                                        |
|-----------------------------------------------------------------------------------------|-------------------|-------------------|----------------------------------------|
| Invicorp 2 solution for injection (Senetek Plc)                                         | 1620041000033114  | 5049011000001101  | Aviptadil/<br>Phentolamine<br>mesilate |
| Phentolamine 10mg/1ml solution for injection ampoules                                   | 3108541000033116  | 36015411000001100 | Phentolamine<br>mesilate               |
| Phentolamine 2mg/0.35ml / Aviptadil 25micrograms/0.35ml solution for injection ampoules | 10617641000033119 | 5049911000001102  | Aviptadil/<br>Phentolamine<br>mesilate |
| Invicorp 25micrograms/2mg/0.35ml solution for injection ampoules (Evolan Pharma AB)     | 10617741000033111 | 30737111000001103 | Aviptadil/<br>Phentolamine<br>mesilate |
| Baratol 25mg tablets (Amdipharm Plc)                                                    | 116741000033118   | 3689111000001107  | Indoramin<br>hydrochloride             |
| Doralese Tiltab 20mg tablets (Chemidex Pharma Ltd)                                      | 480541000033110   | 3354611000001100  | Indoramin<br>hydrochloride             |
| Indoramin 20mg tablets                                                                  | 768541000033119   | 39696511000001106 | Indoramin<br>hydrochloride             |
| Indoramin 25mg tablets                                                                  | 769841000033111   | 39696711000001101 | Indoramin<br>hydrochloride             |
| Dibenyline 10mg capsules (Mercury Pharma Group Ltd)                                     | 438441000033119   | 3895211000001109  | Phenoxybenzamine<br>hydrochloride      |
| Phenoxybenzamine 10mg capsules                                                          | 1070341000033119  | 318745004         | Phenoxybenzamine<br>hydrochloride      |
| Phenoxybenzamine 25mg/5ml oral suspension                                               | 2757941000033118  | 8671511000001109  | Phenoxybenzamine<br>hydrochloride      |
| Alphavase 1 tablets (Ashbourne Pharmaceuticals Ltd)                                     | 37741000033118    | 934411000001100   | Prazosin<br>hydrochloride              |
| Alphavase 2 tablets (Ashbourne Pharmaceuticals Ltd)                                     | 37841000033111    | 570011000001106   | Prazosin<br>hydrochloride              |
| Alphavase 5 tablets (Ashbourne Pharmaceuticals Ltd)                                     | 37941000033115    | 74711000001102    | Prazosin<br>hydrochloride              |
| Hypovase 500microgram tablets (Pfizer Ltd)                                              | 743541000033118   | 321311000001100   | Prazosin<br>hydrochloride              |
| Hypovase 1mg tablets (Pfizer Ltd)                                                       | 743641000033117   | 347411000001101   | Prazosin<br>hydrochloride              |
| Hypovase 2mg tablets (Pfizer Ltd)                                                       | 743741000033114   | 150911000001104   | Prazosin<br>hydrochloride              |
| Prazosin 500microgram tablets                                                           | 1131341000033118  | 318767003         | Prazosin<br>hydrochloride              |
| Prazosin 1mg tablets                                                                    | 1131441000033112  | 318768008         | Prazosin<br>hydrochloride              |
| Prazosin 2mg tablets                                                                    | 1131541000033113  | 318769000         | Prazosin<br>hydrochloride              |
| Prazosin 5mg tablets                                                                    | 1131641000033114  | 318770004         | Prazosin<br>hydrochloride              |
| Prazosin 500micrograms/5ml oral solution                                                | 11567441000033119 | 13078011000001104 | Prazosin<br>hydrochloride              |
| Hytrin 10mg tablets (Advanz Pharma)                                                     | 745641000033116   | 3150911000001107  | Terazosin<br>hydrochloride             |
| Hytrin 2mg tablets (Advanz Pharma)                                                      | 745741000033113   | 3147611000001100  | Terazosin<br>hydrochloride             |
| Hytrin 5mg tablets (Advanz Pharma)                                                      | 745841000033115   | 3154311000001103  | Terazosin<br>hydrochloride             |
| Terazosin 2mg tablets                                                                   | 1425341000033119  | 318779003         | Terazosin<br>hydrochloride             |
| Terazosin 10mg tablets                                                                  | 1429041000033118  | 318777001         | Terazosin<br>hydrochloride             |
| Terazosin 5mg tablets                                                                   | 1429141000033119  | 318776005         | Terazosin<br>hydrochloride             |
| Benph 5mg tablets (Mylan)                                                               | 11807841000033119 | 33628611000001102 | Terazosin<br>hydrochloride             |

**Table S71. Aldosterone Aurum product codes**

| Term from EMIS                                        | Prod code ID     | dmd ID            | Drug substance name                   |
|-------------------------------------------------------|------------------|-------------------|---------------------------------------|
| Spironolactone 50mg/5ml oral suspension               | 1371341000033114 | 8726411000001105  | Spironolactone                        |
| Spironolactone 25mg/5ml oral suspension               | 1371041000033112 | 8726511000001109  | Spironolactone                        |
| Spironolactone 15mg/5ml oral suspension               | 5975441000033113 | 8727011000001103  | Spironolactone                        |
| Spironolactone 10mg/5ml oral suspension               | 1371241000033116 | 8727311000001100  | Spironolactone                        |
| Spironolactone 100mg/5ml oral suspension              | 2011541000033114 | 8727611000001105  | Spironolactone                        |
| Spironolactone 25mg tablets                           | 1374241000033118 | 318056008         | Spironolactone                        |
| Aldactone 25mg tablets (Pfizer Ltd)                   | 40541000033112   | 930511000001105   | Spironolactone                        |
| Aldactone 50mg tablets (Pfizer Ltd)                   | 40641000033113   | 921811000001103   | Spironolactone                        |
| Spironolactone 50mg tablets                           | 1374341000033111 | 318057004         | Spironolactone                        |
| Spironolactone 100mg tablets                          | 1374141000033113 | 318058009         | Spironolactone                        |
| Spirosare 100 tablets (Ashbourne Pharmaceuticals Ltd) | 1374541000033116 | 3411000001104     | Spironolactone                        |
| Aldactone 100mg tablets (Pfizer Ltd)                  | 40441000033111   | 421611000001100   | Spironolactone                        |
| Lasilactone 20mg/50mg capsules (Sanofi)               | 808841000033119  | 3645811000001107  | Furosemide/<br>Spironolactone         |
| Spironolactone 50mg / Furosemide 20mg capsules        | 3162541000033115 | 318102003         | Furosemide/<br>Spironolactone         |
| Aldactide 25 tablets (Pfizer Ltd)                     | 40241000033110   | 762511000001105   | Hydroflumethiazide/<br>Spironolactone |
| Co-flumactone 25mg/25mg tablets                       | 377041000033116  | 318127005         | Hydroflumethiazide/<br>Spironolactone |
| Co-flumactone 50mg/50mg tablets                       | 377141000033117  | 318128000         | Hydroflumethiazide/<br>Spironolactone |
| Aldactide 50 tablets (Pfizer Ltd)                     | 40341000033117   | 4669111000001107  | Hydroflumethiazide/<br>Spironolactone |
| Spironolactone 250mg/5ml oral solution                | 5975541000033114 | 13353511000001101 | Spironolactone                        |
| Spironolactone 250mg/5ml oral suspension              | 5975641000033110 | 13353611000001102 | Spironolactone                        |
| Spironolactone 100mg/5ml oral solution                | 5999141000033111 | 13894611000001109 | Spironolactone                        |
| Spironolactone 10mg/5ml oral solution                 | 5999241000033116 | 13894711000001100 | Spironolactone                        |
| Spironolactone 25mg/5ml oral solution                 | 5890141000033112 | 13894811000001108 | Spironolactone                        |
| Spironolactone 50mg/5ml oral solution                 | 5890441000033116 | 13894911000001103 | Spironolactone                        |
| Spironolactone 5mg/5ml oral solution                  | 5999341000033114 | 13895011000001103 | Spironolactone                        |
| Spironolactone 3mg / Chlorothiazide 30mg capsules     | 9278541000033112 | 16072811000001103 | Chlorothiazide/<br>Spironolactone     |
| Inspra 25mg tablets (Upjohn UK Ltd)                   | 3199041000033116 | 8477211000001104  | Eplerenone                            |
| Eplerenone 25mg tablets                               | 3198841000033117 | 407011007         | Eplerenone                            |
| Eplerenone 50mg tablets                               | 3198941000033113 | 407012000         | Eplerenone                            |
| Inspra 50mg tablets (Upjohn UK Ltd)                   | 3199141000033117 | 8479811000001106  | Eplerenone                            |
| Spironolactone 4mg / Chlorothiazide 40mg capsules     | 7681541000033117 | 18520511000001107 | Chlorothiazide/<br>Spironolactone     |
| Spironolactone 5mg/5ml oral suspension                | 1371141000033111 | 8726311000001103  | Spironolactone                        |

**Table S72. Other antihypertensive Aurum product codes**

| Term from EMIS                                                             | Prod code ID      | dmd ID            | Drug substance name         |
|----------------------------------------------------------------------------|-------------------|-------------------|-----------------------------|
| Apraclonidine 1% eye drops 0.25ml unit dose preservative free              | 73541000033116    | 3958011000001107  | Apraclonidine hydrochloride |
| Apraclonidine 5mg/ml eye drops                                             | 73641000033115    | 330873002         | Apraclonidine hydrochloride |
| Catapres 150micrograms/1ml solution for injection ampoules (Glenwood GmbH) | 196241000033111   | 364911000001108   | Clonidine hydrochloride     |
| Catapres 100microgram tablets (Glenwood GmbH)                              | 215341000033112   | 215111000001101   | Clonidine hydrochloride     |
| Catapres 300microgram tablets (Boehringer Ingelheim Ltd)                   | 215441000033118   | 368711000001103   | Clonidine hydrochloride     |
| Clonidine 250microgram modified-release capsules                           | 261841000033118   | 36089511000001100 | Clonidine hydrochloride     |
| Clonidine 150micrograms/1ml solution for injection ampoules                | 275641000033110   | 36089211000001103 | Clonidine hydrochloride     |
| Clonidine 100microgram tablets                                             | 285841000033118   | 318667005         | Clonidine hydrochloride     |
| Clonidine 25microgram tablets                                              | 285941000033114   | 322840006         | Clonidine hydrochloride     |
| Clonidine 300microgram tablets                                             | 287241000033110   | 318668000         | Clonidine hydrochloride     |
| Dixarit 25microgram tablets (Boehringer Ingelheim Ltd)                     | 464341000033111   | 344511000001105   | Clonidine hydrochloride     |
| Iopidine 1% eye drops 0.25ml unit dose (Novartis Pharmaceuticals UK Ltd)   | 771741000033114   | 3956211000001103  | Apraclonidine hydrochloride |
| Iopidine 5mg/ml eye drops (Novartis Pharmaceuticals UK Ltd)                | 771841000033116   | 3799011000001100  | Apraclonidine hydrochloride |
| Clonidine 200micrograms/24hours transdermal patches                        | 5289041000033110  | 7660211000001104  | Clonidine                   |
| Clonidine 50micrograms/5ml oral solution                                   | 5900141000033118  | 8398511000001100  | Clonidine hydrochloride     |
| Clonidine 50micrograms/5ml oral suspension                                 | 5900241000033113  | 8398611000001101  | Clonidine hydrochloride     |
| Clonidine 100micrograms/24hours transdermal patches                        | 12106941000033117 | 10448511000001104 | Clonidine                   |
| Clonidine 300micrograms/24hours transdermal patches                        | 12107041000033116 | 10449111000001101 | Clonidine                   |
| Catapres TTS 1 patches (Imported (Germany))                                | 12107141000033117 | 10448811000001101 | Clonidine                   |
| Catapres TTS 2 patches (Imported (Germany))                                | 12117941000033118 | 7657311000001101  | Clonidine                   |
| Catapres TTS 3 patches (Imported (Germany))                                | 12118541000033113 | 10449311000001104 | Clonidine                   |
| Clonidine 100micrograms/5ml oral suspension                                | 12569041000033115 | 11813011000001109 | Clonidine hydrochloride     |
| Clonidine 50micrograms/5ml oral solution sugar free                        | 12684041000033114 | 36392711000001102 | Clonidine hydrochloride     |
| Guanfacine 1mg modified-release tablets                                    | 10740841000033116 | 31087611000001109 | Guanfacine hydrochloride    |
| Guanfacine 2mg modified-release tablets                                    | 10740941000033112 | 31087711000001100 | Guanfacine hydrochloride    |
| Guanfacine 3mg modified-release tablets                                    | 10741041000033119 | 31087811000001108 | Guanfacine hydrochloride    |

|                                                                          |                   |                   |                                         |
|--------------------------------------------------------------------------|-------------------|-------------------|-----------------------------------------|
| Guanfacine 4mg modified-release tablets                                  | 10741141000033115 | 31087911000001103 | Guanfacine hydrochloride                |
| Intuniv 1mg modified-release tablets (Takeda UK Ltd)                     | 10741241000033110 | 31074011000001104 | Guanfacine hydrochloride                |
| Intuniv 2mg modified-release tablets (Takeda UK Ltd)                     | 10741341000033117 | 31074311000001101 | Guanfacine hydrochloride                |
| Intuniv 3mg modified-release tablets (Takeda UK Ltd)                     | 10741441000033111 | 31074611000001106 | Guanfacine hydrochloride                |
| Intuniv 4mg modified-release tablets (Takeda UK Ltd)                     | 10741541000033112 | 31074911000001100 | Guanfacine hydrochloride                |
| Aldomet 250mg tablets (Aspen Pharma Trading Ltd)                         | 40941000033118    | 253711000001107   | Methyldopa anhydrous                    |
| Aldomet 500mg tablets (Aspen Pharma Trading Ltd)                         | 41041000033111    | 73611000001108    | Methyldopa anhydrous                    |
| Methyldopa 250mg/5ml oral suspension                                     | 892341000033112   | 8667311000001100  | Methyldopa anhydrous                    |
| Methyldopa 125mg tablets                                                 | 897341000033110   | 318671008         | Methyldopa anhydrous                    |
| Methyldopa 250mg tablets                                                 | 897441000033116   | 318672001         | Methyldopa anhydrous                    |
| Methyldopa 500mg tablets                                                 | 897541000033115   | 318673006         | Methyldopa anhydrous                    |
| Moxonidine 200microgram tablets                                          | 938541000033115   | 318707000         | Moxonidine                              |
| Moxonidine 400microgram tablets                                          | 938641000033119   | 318708005         | Moxonidine                              |
| Physiotens 200microgram tablets (Mylan)                                  | 1080841000033119  | 41111000001102    | Moxonidine                              |
| Physiotens 400microgram tablets (Mylan)                                  | 1080941000033110  | 142811000001107   | Moxonidine                              |
| Moxonidine 300microgram tablets                                          | 2635641000033111  | 408604009         | Moxonidine                              |
| Physiotens 300microgram tablets (Mylan)                                  | 2635741000033119  | 522011000001109   | Moxonidine                              |
| Ganda 3 + 0.5 eye drops (Bausch & Lomb UK Ltd)                           | 622441000033118   | 4668411000001105  | Adrenaline/<br>Guanethidine monosulfate |
| Ganda 1 + 0.2 eye drops (Bausch & Lomb UK Ltd)                           | 622641000033116   | 4668111000001100  | Adrenaline/<br>Guanethidine monosulfate |
| Guanethidine 10mg/1ml solution for injection ampoules                    | 655241000033111   | 36053311000001103 | Guanethidine monosulfate                |
| Ismelin 10mg/1ml solution for injection ampoules (Amdipharm Plc)         | 780741000033110   | 4369611000001106  | Guanethidine monosulfate                |
| Loniten 10mg tablets (Pfizer Ltd)                                        | 850441000033112   | 3666711000001100  | Minoxidil                               |
| Loniten 2.5mg tablets (Pfizer Ltd)                                       | 850541000033113   | 3667011000001104  | Minoxidil                               |
| Loniten 5mg tablets (Pfizer Ltd)                                         | 850641000033114   | 3666411000001106  | Minoxidil                               |
| Minoxidil 10mg tablets                                                   | 920641000033119   | 318657000         | Minoxidil                               |
| Minoxidil 2.5mg tablets                                                  | 920841000033118   | 318655008         | Minoxidil                               |
| Minoxidil 5mg tablets                                                    | 920941000033114   | 318656009         | Minoxidil                               |
| Minoxidil 5% solution                                                    | 921841000033111   | 36036311000001106 | Minoxidil                               |
| Minoxidil 2% solution                                                    | 921941000033115   | 36036211000001103 | Minoxidil                               |
| Regaine for Women Regular Strength 2% solution (McNeil Products Ltd)     | 4026341000033113  | 9524011000001105  | Minoxidil                               |
| Regaine for Men Regular Strength 2% solution (McNeil Products Ltd)       | 4026741000033114  | 9524811000001104  | Minoxidil                               |
| Regaine for Men Extra Strength 5% scalp solution (Johnson & Johnson Ltd) | 4026941000033112  | 9525311000001107  | Minoxidil                               |

|                                                                            |                   |                   |                                |
|----------------------------------------------------------------------------|-------------------|-------------------|--------------------------------|
| Minoxidil 2% gel                                                           | 4125241000033118  | 11472511000001105 | Minoxidil                      |
| Regaine for Men 2% gel (McNeil Products Ltd)                               | 4125341000033111  | 11465411000001105 | Minoxidil                      |
| Regaine for Men Extra Strength 5% scalp foam (McNeil Products Ltd)         | 6448241000033118  | 18550611000001107 | Minoxidil                      |
| Minoxidil 5% foam                                                          | 6448341000033111  | 421143007         | Minoxidil                      |
| Regaine for Women Once a Day 5% scalp foam (McNeil Products Ltd)           | 11803241000033110 | 32066411000001107 | Minoxidil                      |
| Sodium nitroprusside 50mg powder for solution for infusion vials           | 1357141000033115  | 375899001         | Sodium nitroprusside dihydrate |
| Apresoline 20mg powder for solution for injection ampoules (Advanz Pharma) | 73441000033117    | 3925011000001100  | Hydralazine hydrochloride      |
| Apresoline 25mg tablets (Advanz Pharma)                                    | 74341000033114    | 657011000001101   | Hydralazine hydrochloride      |
| Hydralazine 20mg powder for solution for injection ampoules                | 734141000033114   | 34193811000001100 | Hydralazine hydrochloride      |
| Hydralazine 25mg tablets                                                   | 741941000033113   | 318649003         | Hydralazine hydrochloride      |
| Hydralazine 50mg tablets                                                   | 742041000033119   | 318650003         | Hydralazine hydrochloride      |
| Hydralazine 10mg/5ml oral suspension                                       | 4456241000033111  | 8528611000001105  | Hydralazine hydrochloride      |
| Hydralazine 25mg/5ml oral solution                                         | 11072741000033116 | 8580911000001106  | Hydralazine hydrochloride      |
| Hydralazine 10mg tablets                                                   | 12877141000033119 | 414426001         | Hydralazine hydrochloride      |
| Aliskiren 150mg tablets                                                    | 4213641000033112  | 39731411000001101 | Aliskiren hemifumarate         |
| Aliskiren 300mg tablets                                                    | 4213741000033115  | 39731511000001102 | Aliskiren hemifumarate         |
| Rasilez 150mg tablets (Noden Pharma DAC)                                   | 4213841000033113  | 11960911000001108 | Aliskiren hemifumarate         |
| Rasilez 300mg tablets (Noden Pharma DAC)                                   | 4213941000033117  | 11961711000001103 | Aliskiren hemifumarate         |



**Table S73. Antiarrhythmic drugs class 1 Aurum product codes**

| Term from EMIS                                                                                        | Prod code ID      | dmd ID            | Drug substance name                                  |
|-------------------------------------------------------------------------------------------------------|-------------------|-------------------|------------------------------------------------------|
| Emla 5% cream (Aspen Pharma Trading Ltd)                                                              | 511941000033116   | 2936311000001102  | Lidocaine/<br>Prilocaine                             |
| Xylotox 2% E80 Dental injection 2.2ml cartridges (Dentsply Ltd)                                       | 1544441000033116  | 4207211000001108  | Adrenaline acid tartrate/<br>Lidocaine hydrochloride |
| Lidoderm 5% patches (Teikoku Seiyaku)                                                                 | 2942141000033112  | 10570211000001105 | Lidocaine                                            |
| Solarcaine 0.5% gel (Schering-Plough Ltd)                                                             | 2971941000033115  | 4011311000001103  | Lidocaine hydrochloride                              |
| Glucose 5% / Lidocaine 500mg/500ml (0.1%) infusion 500ml bags                                         | 3096041000033116  | 5042311000001106  | Glucose anhydrous/<br>Lidocaine hydrochloride        |
| Glucose 5% / Lidocaine 1g/500ml (0.2%) infusion 500ml bags                                            | 3096141000033117  | 5042411000001104  | Glucose anhydrous/<br>Lidocaine hydrochloride        |
| Lidocaine 100mg/10ml (1%) solution for injection Minijet pre-filled syringes (UCB Pharma Ltd)         | 3096241000033112  | 4716611000001103  | Lidocaine hydrochloride                              |
| Lidocaine 100mg/5ml (2%) solution for injection Minijet pre-filled syringes (UCB Pharma Ltd)          | 3096341000033119  | 9153311000001102  | Lidocaine hydrochloride                              |
| Lignospan Special 20mg/ml / 12.5micrograms/ml solution for injection 2.2ml cartridges (Septodont Ltd) | 4292941000033112  | 21313511000001103 | Adrenaline acid tartrate/<br>Lidocaine hydrochloride |
| Lignospan Special 20mg/ml / 12.5micrograms/ml solution for injection 1.8ml cartridges (Septodont Ltd) | 4418841000033118  | 35061911000001107 | Adrenaline acid tartrate/<br>Lidocaine hydrochloride |
| Lidocaine 70mg / Tetracaine 70mg medicated plasters                                                   | 4434341000033112  | 13210811000001108 | Lidocaine/<br>Tetracaine                             |
| Rapydan 70mg/70mg medicated plasters (EUSA Pharma (UK) Ltd)                                           | 4434441000033118  | 13205811000001100 | Lidocaine/<br>Tetracaine                             |
| Lidocaine 4% cream                                                                                    | 4657441000033112  | 14203911000001107 | Lidocaine                                            |
| Denela 5% cream (Teva UK Ltd)                                                                         | 8840141000033111  | 23364211000001105 | Lidocaine/<br>Prilocaine                             |
| Ralvo 700mg medicated plasters (Grunenthal Ltd)                                                       | 12193941000033114 | 34178211000001102 | Lidocaine                                            |
| Lidocaine 200mg/20ml (1%) solution for injection vials                                                | 6132841000033115  | 3602411000001109  | Lidocaine hydrochloride                              |
| Lidocaine 400mg/20ml (2%) solution for injection vials                                                | 6132641000033116  | 36039711000001100 | Lidocaine hydrochloride                              |
| Nulbia 5% cream (Glenmark Pharmaceuticals Europe Ltd)                                                 | 12421141000033115 | 34881811000001106 | Lidocaine/<br>Prilocaine                             |
| Lidocaine 50mg/5ml (1%) solution for injection Mini-Plasco ampoules (B.Braun Medical Ltd)             | 12685841000033115 | 35863311000001108 | Lidocaine hydrochloride                              |
| Lidocaine 200mg/20ml (1%) solution for injection Mini-Plasco ampoules (B.Braun Medical Ltd)           | 12685941000033111 | 35863611000001103 | Lidocaine hydrochloride                              |
| Lidocaine 100mg/5ml (2%) solution for injection Mini-Plasco ampoules (B.Braun Medical Ltd)            | 12686041000033118 | 35863911000001109 | Lidocaine hydrochloride                              |
| Lidocaine 400mg/20ml (2%) solution for injection Mini-Plasco ampoules (B.Braun Medical Ltd)           | 12686141000033119 | 35864311000001105 | Lidocaine hydrochloride                              |
| Lidocaine 100mg/10ml (1%) solution for injection Mini-Plasco ampoules (B.Braun Medical Ltd)           | 12686341000033116 | 3768311000001105  | Lidocaine hydrochloride                              |
| Lidocaine 200mg/10ml (2%) solution for injection Mini-Plasco ampoules (B.Braun Medical Ltd)           | 12686441000033110 | 4881511000001106  | Lidocaine hydrochloride                              |
| Kinidin 250mg Durules (AstraZeneca UK Ltd)                                                            | 804541000033110   | 3848511000001106  | Quinidine bisulfate                                  |
| Quinidine sulfate 200mg tablets                                                                       | 1149641000033114  | 318317007         | Quinidine sulfate                                    |
| Quinidine bisulfate 250mg modified-release tablets                                                    | 1150941000033112  | 35933811000001102 | Quinidine bisulfate                                  |

|                                                                               |                   |                   |                            |
|-------------------------------------------------------------------------------|-------------------|-------------------|----------------------------|
| Procainamide 1g/10ml solution for injection vials                             | 1119441000033119  | 34194111000001109 | Procainamide hydrochloride |
| Procainamide 250mg capsules                                                   | 5265241000033119  | 375342002         | Procainamide hydrochloride |
| Disopyramide 100mg capsules                                                   | 438841000033116   | 39690511000001109 | Disopyramide               |
| Disopyramide 150mg capsules                                                   | 438941000033112   | 39690611000001108 | Disopyramide               |
| Disopyramide 50mg/5ml solution for injection ampoules                         | 447241000033117   | 36070411000001104 | Disopyramide phosphate     |
| Disopyramide 150mg modified-release tablets                                   | 465241000033119   | 36070111000001109 | Disopyramide phosphate     |
| Disopyramide 250mg modified-release tablets                                   | 465341000033112   | 36070311000001106 | Disopyramide phosphate     |
| Dirythmin SA 150mg tablets (AstraZeneca UK Ltd)                               | 469841000033118   | 3691511000001103  | Disopyramide phosphate     |
| Rythmodan 100mg capsules (Neon Healthcare Ltd)                                | 1203941000033114  | 3465211000001104  | Disopyramide               |
| Rythmodan 150mg capsules (Cheplapharm Arzneimittel GmbH)                      | 1204041000033111  | 3734711000001106  | Disopyramide               |
| Rythmodan 50mg/5ml solution for injection ampoules (Sanofi)                   | 1204241000033115  | 4867311000001109  | Disopyramide phosphate     |
| Rythmodan Retard 250mg tablets (Neon Healthcare Ltd)                          | 1205041000033112  | 3692111000001102  | Disopyramide phosphate     |
| Disopyramide 250mg modified-release capsules                                  | 2907741000033117  | 36070211000001103 | Disopyramide phosphate     |
| Isomide CR 250mg capsules (Tillomed Laboratories Ltd)                         | 2907841000033110  | 3982011000001100  | Disopyramide phosphate     |
| Disopyramide 50mg/5ml oral solution                                           | 8770141000033110  | 8454511000001107  | Disopyramide phosphate     |
| Mexiletine 50mg capsules                                                      | 872841000033111   | 318299008         | Mexiletine hydrochloride   |
| Mexitil 50mg capsules (Boehringer Ingelheim Ltd)                              | 873041000033113   | 3877911000001101  | Mexiletine hydrochloride   |
| Mexitil PL Perlongets 360mg capsules (Boehringer Ingelheim Ltd)               | 873141000033112   | 4543311000001105  | Mexiletine hydrochloride   |
| Mexiletine 250mg/10ml solution for injection ampoules                         | 879641000033116   | 36035711000001102 | Mexiletine hydrochloride   |
| Mexitil 250mg/10ml solution for injection ampoules (Boehringer Ingelheim Ltd) | 879741000033113   | 4378311000001101  | Mexiletine hydrochloride   |
| Mexiletine 100mg capsules                                                     | 8129541000033115  | 21394911000001108 | Mexiletine hydrochloride   |
| Mexiletine hydrochloride 200mg (Mexiletine 167mg) capsules                    | 12888441000033116 | 36595811000001101 | Mexiletine hydrochloride   |
| Namuscla 167mg capsules (Lupin Healthcare (UK) Ltd)                           | 12888541000033115 | 36538811000001103 | Mexiletine hydrochloride   |
| Flecainide 150mg/15ml solution for injection ampoules                         | 587241000033119   | 36067511000001109 | Flecainide acetate         |
| Flecainide 50mg tablets                                                       | 594541000033114   | 318276009         | Flecainide acetate         |
| Flecainide 100mg tablets                                                      | 595141000033116   | 318277000         | Flecainide acetate         |
| Tambocor 150mg/15ml solution for injection ampoules (Teva UK Ltd)             | 1405841000033116  | 638511000001109   | Flecainide acetate         |
| Tambocor 50mg tablets (Teva UK Ltd)                                           | 1407441000033114  | 77511000001104    | Flecainide acetate         |
| Tambocor 100mg tablets (Teva UK Ltd)                                          | 1408041000033118  | 516411000001107   | Flecainide acetate         |
| Flecainide 25mg/5ml oral solution                                             | 2780641000033119  | 8514511000001105  | Flecainide acetate         |
| Flecainide 200mg modified-release capsules                                    | 4043141000033117  | 11169611000001105 | Flecainide acetate         |
| Tambocor XL 200mg capsules (Teva UK Ltd)                                      | 4043241000033112  | 11158611000001107 | Flecainide acetate         |
| Flecainide 10mg/5ml oral suspension                                           | 4432741000033117  | 8514411000001106  | Flecainide acetate         |
| Flecainide 25mg/5ml oral suspension                                           | 5993141000033114  | 8514611000001109  | Flecainide acetate         |

|                                |                  |                 |                           |
|--------------------------------|------------------|-----------------|---------------------------|
| Arythmol 150mg tablets (Mylan) | 81441000033111   | 273811000001102 | Propafenone hydrochloride |
| Arythmol 300mg tablets (Mylan) | 81541000033112   | 69011000001108  | Propafenone hydrochloride |
| Propafenone 150mg tablets      | 1140341000033110 | 318334004       | Propafenone hydrochloride |
| Propafenone 300mg tablets      | 1140441000033116 | 318335003       | Propafenone hydrochloride |

**Table S74. Antiarrhythmic drugs class 3 Aurum product codes**

| Term from EMIS                                                                              | Prod code ID     | dmd ID            | Drug substance name       |
|---------------------------------------------------------------------------------------------|------------------|-------------------|---------------------------|
| Amiodarone 150mg/3ml solution for injection ampoules                                        | 48341000033119   | 35900911000001106 | Amiodarone hydrochloride  |
| Amiodarone 100mg tablets                                                                    | 57641000033111   | 318186003         | Amiodarone hydrochloride  |
| Amiodarone 200mg tablets                                                                    | 57741000033119   | 318187007         | Amiodarone hydrochloride  |
| Cordarone X 100 tablets (Zentiva Pharma UK Ltd)                                             | 374641000033115  | 294711000001103   | Amiodarone hydrochloride  |
| Cordarone X 200 tablets (Zentiva Pharma UK Ltd)                                             | 374741000033112  | 269511000001109   | Amiodarone hydrochloride  |
| Amiodarone 300mg/10ml solution for injection pre-filled syringes                            | 2644341000033117 | 35901011000001103 | Amiodarone hydrochloride  |
| Amyben 100mg tablets (Lexon (UK) Ltd)                                                       | 2866241000033119 | 9108411000001107  | Amiodarone hydrochloride  |
| Amyben 200mg tablets (Lexon (UK) Ltd)                                                       | 2866341000033112 | 9108711000001101  | Amiodarone hydrochloride  |
| Amiodarone 25mg/5ml oral suspension                                                         | 3980241000033116 | 8275411000001105  | Amiodarone hydrochloride  |
| Amiodarone 100mg/5ml oral solution                                                          | 3984941000033117 | 8274311000001102  | Amiodarone hydrochloride  |
| Amiodarone 200mg/5ml oral suspension                                                        | 4505441000033115 | 8274611000001107  | Amiodarone hydrochloride  |
| Amiodarone 50mg/5ml oral solution                                                           | 5897541000033119 | 8276111000001106  | Amiodarone hydrochloride  |
| Amiodarone 50mg/5ml oral suspension                                                         | 5897641000033118 | 8276211000001100  | Amiodarone hydrochloride  |
| Amiodarone 100mg/5ml oral suspension                                                        | 9774741000033117 | 8274411000001109  | Amiodarone hydrochloride  |
| Beta-Cardone 200mg tablets (Advanz Pharma)                                                  | 143941000033116  | 447111000001104   | Sotalol hydrochloride     |
| Beta-Cardone 40mg tablets (Focus Pharmaceuticals Ltd)                                       | 144041000033119  | 900511000001103   | Sotalol hydrochloride     |
| Beta-Cardone 80mg tablets (Focus Pharmaceuticals Ltd)                                       | 144141000033115  | 104011000001101   | Sotalol hydrochloride     |
| Sotacor 40mg/4ml solution for injection ampoules (Bristol-Myers Squibb Pharmaceuticals Ltd) | 1358541000033113 | 694711000001100   | Sotalol hydrochloride     |
| Sotacor 160mg tablets (Bristol-Myers Squibb Pharmaceuticals Ltd)                            | 1366041000033112 | 446211000001108   | Sotalol hydrochloride     |
| Sotacor 80mg tablets (Neon Healthcare Ltd)                                                  | 1366141000033111 | 463811000001109   | Sotalol hydrochloride     |
| Sotalol 160mg tablets                                                                       | 1367141000033113 | 318528007         | Sotalol hydrochloride     |
| Sotalol 200mg tablets                                                                       | 1367241000033118 | 318527002         | Sotalol hydrochloride     |
| Sotalol 40mg tablets                                                                        | 1367441000033117 | 318525005         | Sotalol hydrochloride     |
| Sotalol 80mg tablets                                                                        | 1367541000033116 | 318526006         | Sotalol hydrochloride     |
| Sotalol 40mg/4ml solution for injection ampoules                                            | 2908541000033114 | 35930811000001109 | Sotalol hydrochloride     |
| Sotalol 25mg/5ml oral solution                                                              | 3953441000033116 | 8726811000001107  | Sotalol hydrochloride     |
| Sotalol 25mg/5ml oral suspension                                                            | 9776441000033119 | 8726911000001102  | Sotalol hydrochloride     |
| Dronedarone 400mg tablets                                                                   | 5566541000033116 | 39691711000001107 | Dronedarone hydrochloride |
| Multaq 400mg tablets (Sanofi)                                                               | 5566641000033115 | 17066411000001106 | Dronedarone hydrochloride |

**Table S75. Digoxin Aurum product codes**

| Term from EMIS                                         | Prod code ID     | dmd ID            | Drug substance name                |
|--------------------------------------------------------|------------------|-------------------|------------------------------------|
| Azilsartan medoxomil 20mg tablets                      | 7754841000033119 | 20418711000001104 | Azilsartan medoxomil               |
| Azilsartan medoxomil 40mg tablets                      | 7754941000033110 | 449109006         | Azilsartan medoxomil               |
| Azilsartan medoxomil 80mg tablets                      | 7755041000033110 | 449333009         | Azilsartan medoxomil               |
| Edarbi 20mg tablets (Takeda UK Ltd)                    | 7755141000033114 | 20350911000001100 | Azilsartan medoxomil               |
| Edarbi 40mg tablets (Takeda UK Ltd)                    | 7755241000033119 | 20351211000001103 | Azilsartan medoxomil               |
| Edarbi 80mg tablets (Takeda UK Ltd)                    | 7755341000033112 | 20351811000001102 | Azilsartan medoxomil               |
| Amias 16mg tablets (Takeda UK Ltd)                     | 59141000033113   | 908511000001100   | Candesartan cilexetil              |
| Amias 2mg tablets (Takeda UK Ltd)                      | 59241000033118   | 97311000001103    | Candesartan cilexetil              |
| Amias 4mg tablets (Takeda UK Ltd)                      | 59341000033111   | 857411000001100   | Candesartan cilexetil              |
| Amias 8mg tablets (Takeda UK Ltd)                      | 59441000033117   | 36011000001106    | Candesartan cilexetil              |
| Candesartan 16mg tablets                               | 211541000033119  | 318980005         | Candesartan cilexetil              |
| Candesartan 2mg tablets                                | 211641000033118  | 318977009         | Candesartan cilexetil              |
| Candesartan 4mg tablets                                | 211741000033110  | 318978004         | Candesartan cilexetil              |
| Candesartan 8mg tablets                                | 211841000033117  | 318979007         | Candesartan cilexetil              |
| Candesartan 32mg tablets                               | 3227241000033111 | 376998003         | Candesartan cilexetil              |
| Amias 32mg tablets (Takeda UK Ltd)                     | 3227341000033118 | 8983911000001107  | Candesartan cilexetil              |
| Eprosartan 300mg tablets                               | 2036341000033115 | 318994006         | Eprosartan mesilate                |
| Eprosartan 400mg tablets                               | 2036441000033114 | 318995007         | Eprosartan mesilate                |
| Eprosartan 600mg tablets                               | 2036541000033110 | 318996008         | Eprosartan mesilate                |
| Teveten 300mg tablets (Mylan)                          | 2040841000033113 | 401211000001105   | Eprosartan mesilate                |
| Teveten 400mg tablets (Abbott Healthcare Products Ltd) | 2040941000033117 | 151411000001103   | Eprosartan mesilate                |
| Teveten 600mg tablets (Mylan)                          | 2041041000033110 | 872011000001109   | Eprosartan mesilate                |
| Aprovel 150mg tablets (Sanofi)                         | 75941000033114   | 859711000001103   | Irbesartan                         |
| Aprovel 300mg tablets (Sanofi)                         | 76041000033116   | 323211000001107   | Irbesartan                         |
| Aprovel 75mg tablets (Sanofi)                          | 76141000033117   | 434511000001104   | Irbesartan                         |
| Irbesartan 150mg tablets                               | 775441000033117  | 318969005         | Irbesartan                         |
| Irbesartan 300mg tablets                               | 775541000033116  | 318970006         | Irbesartan                         |
| Irbesartan 75mg tablets                                | 775641000033115  | 318968002         | Irbesartan                         |
| CoAprovel 150mg/12.5mg tablets (Sanofi)                | 2216141000033115 | 792411000001108   | Hydrochlorothiazide/<br>Irbesartan |
| CoAprovel 300mg/12.5mg tablets (Sanofi)                | 2216241000033110 | 682711000001109   | Hydrochlorothiazide/<br>Irbesartan |
| Irbesartan 150mg / Hydrochlorothiazide 12.5mg tablets  | 3161141000033116 | 134461004         | Hydrochlorothiazide/<br>Irbesartan |
| Irbesartan 300mg / Hydrochlorothiazide 12.5mg tablets  | 3161241000033111 | 134460003         | Hydrochlorothiazide/<br>Irbesartan |
| Irbesartan 300mg / Hydrochlorothiazide 25mg tablets    | 3995241000033112 | 10970311000001105 | Hydrochlorothiazide/<br>Irbesartan |
| CoAprovel 300mg/25mg tablets (Sanofi)                  | 3995341000033119 | 10968611000001106 | Hydrochlorothiazide/<br>Irbesartan |
| Irbesartan 300mg/5ml oral suspension                   | 4954341000033111 | 12639511000001103 | Irbesartan                         |

|                                                                |                  |                   |                                              |
|----------------------------------------------------------------|------------------|-------------------|----------------------------------------------|
| Irbesartan 150mg/5ml oral suspension                           | 5970641000033117 | 8580811000001101  | Irbesartan                                   |
| Irbesartan 37.5mg oral powder sachets                          | 6435741000033117 | 19481911000001105 | Irbesartan                                   |
| Ifirmasta 75mg tablets (Consilient Health Ltd)                 | 8554141000033116 | 22720311000001108 | Irbesartan                                   |
| Ifirmasta 150mg tablets (Consilient Health Ltd)                | 8554241000033111 | 22720611000001103 | Irbesartan                                   |
| Ifirmasta 300mg tablets (Consilient Health Ltd)                | 8554341000033118 | 22720811000001104 | Irbesartan                                   |
| Cozaar 25mg tablets (Organon Pharma (UK) Ltd)                  | 370441000033112  | 266511000001104   | Losartan potassium                           |
| Cozaar 50mg tablets (Organon Pharma (UK) Ltd)                  | 370541000033113  | 53611000001106    | Losartan potassium                           |
| Cozaar-Comp 50mg/12.5mg tablets (Organon Pharma (UK) Ltd)      | 370841000033110  | 255911000001105   | Hydrochlorothiazide/<br>Losartan potassium   |
| Losartan 25mg tablets                                          | 851841000033117  | 318955005         | Losartan potassium                           |
| Losartan 50mg tablets                                          | 851941000033113  | 318956006         | Losartan potassium                           |
| Losartan 100mg tablets                                         | 2720141000033115 | 407784004         | Losartan potassium                           |
| Cozaar 100mg tablets (Organon Pharma (UK) Ltd)                 | 2720241000033110 | 245811000001102   | Losartan potassium                           |
| Losartan 50mg / Hydrochlorothiazide 12.5mg tablets             | 3161741000033117 | 318959004         | Hydrochlorothiazide/<br>Losartan potassium   |
| Losartan 100mg / Hydrochlorothiazide 25mg tablets              | 3346841000033117 | 395497004         | Hydrochlorothiazide/<br>Losartan potassium   |
| Cozaar-Comp 100mg/25mg tablets (Organon Pharma (UK) Ltd)       | 3346941000033113 | 9566911000001105  | Hydrochlorothiazide/<br>Losartan potassium   |
| Losartan 100mg / Hydrochlorothiazide 12.5mg tablets            | 4424741000033110 | 13112711000001103 | Hydrochlorothiazide/<br>Losartan potassium   |
| Cozaar-Comp 100mg/12.5mg tablets (Organon Pharma (UK) Ltd)     | 4424841000033117 | 13094111000001102 | Hydrochlorothiazide/<br>Losartan potassium   |
| Losartan 12.5mg tablets                                        | 4957541000033114 | 15148111000001100 | Losartan potassium                           |
| Cozaar 12.5mg tablets (Organon Pharma (UK) Ltd)                | 4957641000033110 | 15138911000001101 | Losartan potassium                           |
| Losartan 2.5mg/ml oral suspension sugar free                   | 5149941000033118 | 15507411000001105 | Losartan potassium                           |
| Cozaar 2.5mg/ml oral suspension (Organon Pharma (UK) Ltd)      | 5150041000033110 | 15506811000001105 | Losartan potassium                           |
| Losartan 100mg/5ml oral solution                               | 5971741000033116 | 15451111000001107 | Losartan potassium                           |
| Losartan 100mg/5ml oral suspension                             | 5971841000033114 | 15451211000001101 | Losartan potassium                           |
| Losartan 50mg/5ml oral solution                                | 5971941000033118 | 14159411000001106 | Losartan potassium                           |
| Losartan 50mg/5ml oral suspension                              | 5972041000033112 | 14159511000001105 | Losartan potassium                           |
| Olmesartan medoxomil 10mg tablets                              | 2944541000033111 | 408055003         | Olmesartan medoxomil                         |
| Olmesartan medoxomil 20mg tablets                              | 2944641000033112 | 385542009         | Olmesartan medoxomil                         |
| Olmesartan medoxomil 40mg tablets                              | 2944741000033115 | 385543004         | Olmesartan medoxomil                         |
| Olmotec 10mg tablets (Daiichi Sankyo UK Ltd)                   | 2944841000033113 | 4624011000001101  | Olmesartan medoxomil                         |
| Olmotec 20mg tablets (Daiichi Sankyo UK Ltd)                   | 2944941000033117 | 4624311000001103  | Olmesartan medoxomil                         |
| Olmotec 40mg tablets (Daiichi Sankyo UK Ltd)                   | 2945041000033117 | 4624611000001108  | Olmesartan medoxomil                         |
| Olmesartan medoxomil 20mg / Hydrochlorothiazide 12.5mg tablets | 3908941000033112 | 409184002         | Hydrochlorothiazide/<br>Olmesartan medoxomil |
| Olmesartan medoxomil 20mg / Hydrochlorothiazide 25mg tablets   | 3909041000033115 | 10270711000001105 | Hydrochlorothiazide/<br>Olmesartan medoxomil |
| Olmotec Plus 20mg/12.5mg tablets (Daiichi Sankyo UK Ltd)       | 3909141000033116 | 10261511000001103 | Hydrochlorothiazide/<br>Olmesartan medoxomil |

|                                                                   |                  |                   |                                                                         |
|-------------------------------------------------------------------|------------------|-------------------|-------------------------------------------------------------------------|
| Olmotec Plus 20mg/25mg tablets (Daiichi Sankyo UK Ltd)            | 3909241000033111 | 10261811000001100 | Hydrochlorothiazide/<br>Olmesartan<br>medoxomil                         |
| Olmesartan medoxomil 10mg/5ml oral suspension                     | 4273241000033118 | 14680711000001103 | Olmesartan<br>medoxomil                                                 |
| Olmesartan medoxomil 20mg / Amlodipine 5mg tablets                | 5005841000033114 | 429502004         | Amlodipine besilate/<br>Olmesartan<br>medoxomil                         |
| Olmesartan medoxomil 40mg / Amlodipine 5mg tablets                | 5005941000033118 | 429503009         | Amlodipine besilate/<br>Olmesartan<br>medoxomil                         |
| Olmesartan medoxomil 40mg / Amlodipine 10mg tablets               | 5006041000033111 | 429678006         | Amlodipine besilate/<br>Olmesartan<br>medoxomil                         |
| Sevikar 20mg/5mg tablets (Daiichi Sankyo UK Ltd)                  | 5006141000033110 | 15773211000001105 | Amlodipine besilate/<br>Olmesartan<br>medoxomil                         |
| Sevikar 40mg/5mg tablets (Daiichi Sankyo UK Ltd)                  | 5006241000033115 | 15772911000001108 | Amlodipine besilate/<br>Olmesartan<br>medoxomil                         |
| Sevikar 40mg/10mg tablets (Daiichi Sankyo UK Ltd)                 | 5006341000033113 | 15772611000001102 | Amlodipine besilate/<br>Olmesartan<br>medoxomil                         |
| Olmesartan medoxomil 40mg /<br>Hydrochlorothiazide 12.5mg tablets | 5566341000033111 | 409185001         | Hydrochlorothiazide/<br>Olmesartan<br>medoxomil                         |
| Olmotec Plus 40mg/12.5mg tablets (Daiichi Sankyo UK Ltd)          | 5566441000033117 | 17220911000001102 | Hydrochlorothiazide/<br>Olmesartan<br>medoxomil                         |
| Sevikar HCT 20mg/5mg/12.5mg tablets (Daiichi Sankyo UK Ltd)       | 6180641000033112 | 18986411000001108 | Amlodipine besilate/<br>Hydrochlorothiazide/<br>Olmesartan<br>medoxomil |
| Sevikar HCT 40mg/5mg/12.5mg tablets (Daiichi Sankyo UK Ltd)       | 6180741000033115 | 18986711000001102 | Amlodipine besilate/<br>Hydrochlorothiazide/<br>Olmesartan<br>medoxomil |
| Sevikar HCT 40mg/10mg/12.5mg tablets (Daiichi Sankyo UK Ltd)      | 6180841000033113 | 18987011000001101 | Amlodipine besilate/<br>Hydrochlorothiazide/<br>Olmesartan<br>medoxomil |
| Sevikar HCT 40mg/5mg/25mg tablets (Daiichi Sankyo UK Ltd)         | 6180941000033117 | 18987311000001103 | Amlodipine besilate/<br>Hydrochlorothiazide/<br>Olmesartan<br>medoxomil |
| Sevikar HCT 40mg/10mg/25mg tablets (Daiichi Sankyo UK Ltd)        | 6181041000033110 | 18987611000001108 | Amlodipine besilate/<br>Hydrochlorothiazide/<br>Olmesartan<br>medoxomil |
| Diovan 160mg capsules (Novartis Pharmaceuticals UK Ltd)           | 437641000033118  | 117011000001107   | Valsartan                                                               |
| Diovan 40mg capsules (Novartis Pharmaceuticals UK Ltd)            | 437741000033110  | 777611000001101   | Valsartan                                                               |
| Diovan 80mg capsules (Novartis Pharmaceuticals UK Ltd)            | 437841000033117  | 554511000001105   | Valsartan                                                               |
| Valsartan 160mg capsules                                          | 1498241000033111 | 318963006         | Valsartan                                                               |
| Valsartan 40mg capsules                                           | 1498341000033118 | 318961008         | Valsartan                                                               |
| Valsartan 80mg capsules                                           | 1498441000033112 | 318962001         | Valsartan                                                               |
| Co-Diovan 160mg/12.5mg tablets (Novartis Pharmaceuticals UK Ltd)  | 3152541000033112 | 7668611000001104  | Hydrochlorothiazide/<br>Valsartan                                       |
| Co-Diovan 160mg/25mg tablets (Novartis Pharmaceuticals UK Ltd)    | 3152641000033113 | 7668911000001105  | Hydrochlorothiazide/<br>Valsartan                                       |

|                                                                 |                   |                   |                                   |
|-----------------------------------------------------------------|-------------------|-------------------|-----------------------------------|
| Valsartan 160mg / Hydrochlorothiazide 12.5mg tablets            | 3161441000033112  | 395521005         | Hydrochlorothiazide/<br>Valsartan |
| Valsartan 160mg / Hydrochlorothiazide 25mg tablets              | 3161541000033113  | 409298002         | Hydrochlorothiazide/<br>Valsartan |
| Valsartan 80mg / Hydrochlorothiazide 12.5mg tablets             | 3190741000033112  | 377488008         | Hydrochlorothiazide/<br>Valsartan |
| Co-Diovan 80mg/12.5mg tablets (Novartis Pharmaceuticals UK Ltd) | 3190841000033119  | 8150111000001108  | Hydrochlorothiazide/<br>Valsartan |
| Valsartan 40mg tablets                                          | 3201341000033115  | 416515008         | Valsartan                         |
| Diovan 40mg tablets (Novartis Pharmaceuticals UK Ltd)           | 3201441000033114  | 8263211000001101  | Valsartan                         |
| Amlodipine 5mg / Valsartan 80mg tablets                         | 4021441000033114  | 11160311000001109 | Amlodipine besilate/<br>Valsartan |
| Amlodipine 5mg / Valsartan 160mg tablets                        | 4021541000033110  | 11160211000001101 | Amlodipine besilate/<br>Valsartan |
| Amlodipine 10mg / Valsartan 160mg tablets                       | 4021641000033111  | 11160111000001107 | Amlodipine besilate/<br>Valsartan |
| Exforge 5mg/80mg tablets (Novartis Pharmaceuticals UK Ltd)      | 4021741000033119  | 11161811000001108 | Amlodipine besilate/<br>Valsartan |
| Exforge 5mg/160mg tablets (Novartis Pharmaceuticals UK Ltd)     | 4021841000033112  | 11161511000001105 | Amlodipine besilate/<br>Valsartan |
| Exforge 10mg/160mg tablets (Novartis Pharmaceuticals UK Ltd)    | 4021941000033116  | 11160711000001108 | Amlodipine besilate/<br>Valsartan |
| Valsartan 320mg tablets                                         | 4424941000033113  | 376487009         | Valsartan                         |
| Diovan 320mg tablets (Novartis Pharmaceuticals UK Ltd)          | 4425041000033113  | 13143311000001102 | Valsartan                         |
| Valsartan 80mg tablets                                          | 6515441000033113  | 375034009         | Valsartan                         |
| Valsartan 160mg tablets                                         | 6515541000033114  | 375035005         | Valsartan                         |
| Valsartan 3mg/ml oral solution                                  | 6528441000033113  | 20007411000001100 | Valsartan                         |
| Diovan 3mg/1ml oral solution (Novartis Pharmaceuticals UK Ltd)  | 6528541000033114  | 20001711000001102 | Valsartan                         |
| Sacubitril 24mg / Valsartan 26mg tablets                        | 10943641000033117 | 31142011000001103 | Sacubitril/ Valsartan             |
| Sacubitril 49mg / Valsartan 51mg tablets                        | 10943741000033114 | 31142111000001102 | Sacubitril/ Valsartan             |
| Sacubitril 97mg / Valsartan 103mg tablets                       | 10943841000033116 | 31142211000001108 | Sacubitril/ Valsartan             |
| Entresto 24mg/26mg tablets (Novartis Pharmaceuticals UK Ltd)    | 10943941000033112 | 31136811000001109 | Sacubitril/ Valsartan             |
| Entresto 49mg/51mg tablets (Novartis Pharmaceuticals UK Ltd)    | 10944041000033114 | 31136411000001107 | Sacubitril/ Valsartan             |
| Entresto 97mg/103mg tablets (Novartis Pharmaceuticals UK Ltd)   | 10944141000033113 | 31138011000001104 | Sacubitril/ Valsartan             |



**Table S76. Sodium-glucose co-transporter-2 inhibitors Aurum product codes**

| Term from EMIS                                            | Prod code ID      | dmd ID            | Drug substance name                                                 |
|-----------------------------------------------------------|-------------------|-------------------|---------------------------------------------------------------------|
| Forxiga 5mg tablets (AstraZeneca UK Ltd)                  | 8199541000033113  | 21609511000001105 | Dapagliflozin propanediol monohydrate                               |
| Dapagliflozin 5mg tablets                                 | 8199341000033118  | 703679006         | Dapagliflozin propanediol monohydrate                               |
| Dapagliflozin 10mg tablets                                | 8199441000033112  | 703680009         | Dapagliflozin propanediol monohydrate                               |
| Forxiga 10mg tablets (AstraZeneca UK Ltd)                 | 8199641000033114  | 21609811000001108 | Dapagliflozin propanediol monohydrate                               |
| Xigduo 5mg/1000mg tablets (AstraZeneca UK Ltd)            | 9106241000033119  | 24018511000001102 | Dapagliflozin propanediol monohydrate/<br>Metformin hydrochloride   |
| Dapagliflozin 5mg / Metformin 1g tablets                  | 9106041000033110  | 24054611000001100 | Dapagliflozin propanediol monohydrate/<br>Metformin hydrochloride   |
| Dapagliflozin 5mg / Metformin 850mg tablets               | 9106141000033114  | 24054711000001109 | Dapagliflozin propanediol monohydrate/<br>Metformin hydrochloride   |
| Xigduo 5mg/850mg tablets (AstraZeneca UK Ltd)             | 9106341000033112  | 24018111000001106 | Dapagliflozin propanediol monohydrate/<br>Metformin hydrochloride   |
| Saxagliptin 5mg / Dapagliflozin 10mg tablets              | 11898041000033111 | 33745311000001109 | Dapagliflozin propanediol monohydrate/<br>Saxagliptin hydrochloride |
| Qtern 5mg/10mg tablets (AstraZeneca UK Ltd)               | 11898141000033110 | 33682311000001103 | Dapagliflozin propanediol monohydrate/<br>Saxagliptin hydrochloride |
| Jardiance 10mg tablets (Boehringer Ingelheim Ltd)         | 9337141000033114  | 25238811000001107 | Empagliflozin                                                       |
| Empagliflozin 10mg tablets                                | 9336641000033119  | 25290511000001101 | Empagliflozin                                                       |
| Empagliflozin 25mg tablets                                | 9336841000033118  | 25290611000001102 | Empagliflozin                                                       |
| Jardiance 25mg tablets (Boehringer Ingelheim Ltd)         | 9337241000033119  | 25239711000001108 | Empagliflozin                                                       |
| Empagliflozin 12.5mg / Metformin 1g tablets               | 10614441000033112 | 30318111000001109 | Empagliflozin/<br>Metformin hydrochloride                           |
| Synjardy 12.5mg/1000mg tablets (Boehringer Ingelheim Ltd) | 10614841000033110 | 30175711000001100 | Empagliflozin/<br>Metformin hydrochloride                           |
| Synjardy 12.5mg/850mg tablets (Boehringer Ingelheim Ltd)  | 10614741000033117 | 30175011000001102 | Empagliflozin/<br>Metformin hydrochloride                           |
| Empagliflozin 12.5mg / Metformin 850mg tablets            | 10614341000033118 | 30318211000001103 | Empagliflozin/<br>Metformin hydrochloride                           |

|                                                          |                   |                   |                                                             |
|----------------------------------------------------------|-------------------|-------------------|-------------------------------------------------------------|
| Empagliflozin 5mg / Metformin 1g tablets                 | 10614241000033111 | 30318311000001106 | Empagliflozin/<br>Metformin<br>hydrochloride                |
| Synjardy 5mg/1000mg tablets (Boehringer Ingelheim Ltd)   | 10614641000033114 | 30174111000001100 | Empagliflozin/<br>Metformin<br>hydrochloride                |
| Synjardy 5mg/850mg tablets (Boehringer Ingelheim Ltd)    | 10614541000033113 | 30173411000001107 | Empagliflozin/<br>Metformin<br>hydrochloride                |
| Empagliflozin 5mg / Metformin 850mg tablets              | 10614141000033116 | 30318411000001104 | Empagliflozin/<br>Metformin<br>hydrochloride                |
| Empagliflozin 10mg / Linagliptin 5mg tablets             | 13116741000033112 | 37280311000001109 | Empagliflozin/<br>Linagliptin                               |
| Glyxambi 10mg/5mg tablets (Boehringer Ingelheim Ltd)     | 13116941000033110 | 37225211000001100 | Empagliflozin/<br>Linagliptin                               |
| Glyxambi 25mg/5mg tablets (Boehringer Ingelheim Ltd)     | 13117041000033111 | 37225511000001102 | Empagliflozin/<br>Linagliptin                               |
| Empagliflozin 25mg / Linagliptin 5mg tablets             | 13116841000033119 | 37280511000001103 | Empagliflozin/<br>Linagliptin                               |
| Canagliflozin 100mg tablets                              | 9110341000033112  | 703682001         | Canagliflozin<br>hemihydrate                                |
| Invokana 100mg tablets (Napp Pharmaceuticals Ltd)        | 9110541000033117  | 24088611000001101 | Canagliflozin<br>hemihydrate                                |
| Canagliflozin 300mg tablets                              | 9110441000033118  | 24104511000001103 | Canagliflozin<br>hemihydrate                                |
| Invokana 300mg tablets (Napp Pharmaceuticals Ltd)        | 9110641000033116  | 24088311000001106 | Canagliflozin<br>hemihydrate                                |
| Canagliflozin 50mg / Metformin 1g tablets                | 9851541000033114  | 28049211000001101 | Canagliflozin<br>hemihydrate/<br>Metformin<br>hydrochloride |
| Vokanamet 50mg/1000mg tablets (Napp Pharmaceuticals Ltd) | 9851841000033111  | 28024411000001103 | Canagliflozin<br>hemihydrate/<br>Metformin<br>hydrochloride |
| Vokanamet 50mg/850mg tablets (Napp Pharmaceuticals Ltd)  | 9851741000033118  | 28022511000001109 | Canagliflozin<br>hemihydrate/<br>Metformin<br>hydrochloride |
| Canagliflozin 50mg / Metformin 850mg tablets             | 9851641000033110  | 28049311000001109 | Canagliflozin<br>hemihydrate/<br>Metformin<br>hydrochloride |

**Table S77. Nonsteroidal anti-inflammatory drug Aurum product codes**

| Term from EMIS                                                                               | Prod code ID      | dmd ID            | Drug substance name                                       |
|----------------------------------------------------------------------------------------------|-------------------|-------------------|-----------------------------------------------------------|
| Aspirin 75mg dispersible tablets                                                             | 82941000033113    | 319773006         | Aspirin                                                   |
| PostMI 75 dispersible tablets (Ashbourne Pharmaceuticals Ltd)                                | 1098041000033111  | 636011000001100   | Aspirin                                                   |
| Danamep 75mg dispersible tablets (Ecogen Europe Ltd)                                         | 11716941000033112 | 32968711000001107 | Aspirin                                                   |
| Mandaprin 75mg dispersible tablets (M & A Pharmachem Ltd)                                    | 12684641000033115 | 35581511000001100 | Aspirin                                                   |
| Angettes 75 tablets (Bristol-Myers Squibb Pharmaceuticals Ltd)                               | 71241000033119    | 800511000001106   | Aspirin                                                   |
| Aspirin 75mg tablets                                                                         | 87041000033110    | 319775004         | Aspirin                                                   |
| Aspirin 75mg gastro-resistant tablets                                                        | 83041000033115    | 319781007         | Aspirin                                                   |
| Caprin 75mg gastro-resistant tablets (Wockhardt UK Ltd)                                      | 189841000033119   | 927411000001108   | Aspirin                                                   |
| Enprin 75mg gastro-resistant tablets (Galpharm International Ltd)                            | 1729141000033110  | 473711000001109   | Aspirin                                                   |
| Nu-Seals 75 gastro-resistant tablets (Alliance Pharmaceuticals Ltd)                          | 991441000033115   | 414311000001102   | Aspirin                                                   |
| Micropirin 75mg gastro-resistant tablets (Dexcel-Pharma Ltd)                                 | 2273741000033118  | 281311000001104   | Aspirin                                                   |
| PostMI 75 EC tablets (Ashbourne Pharmaceuticals Ltd)                                         | 1101541000033119  | 38411000001101    | Aspirin                                                   |
| Combogesic 500mg/150mg tablets (Thornton & Ross Ltd)                                         | 11781641000033113 | 33563011000001103 | Ibuprofen/<br>Paracetamol                                 |
| Paracetamol 500mg / Ibuprofen 150mg tablets                                                  | 11781541000033112 | 33568211000001100 | Ibuprofen/<br>Paracetamol                                 |
| Ibuprofen lysine 400mg tablets                                                               | 5376641000033111  | 10245111000001102 | Ibuprofen lysine                                          |
| Nurofen Maximum Strength Migraine Pain 684mg caplets (Reckitt Benckiser Healthcare (UK) Ltd) | 5376741000033119  | 10239611000001109 | Ibuprofen lysine                                          |
| Caprin 300mg gastro-resistant tablets (Pinewood Healthcare)                                  | 212341000033117   | 901211000001107   | Aspirin                                                   |
| Nu-Seals 300 gastro-resistant tablets (Alliance Pharmaceuticals Ltd)                         | 993341000033113   | 183311000001101   | Aspirin                                                   |
| Aspirin 300mg gastro-resistant tablets                                                       | 83141000033116    | 322225002         | Aspirin                                                   |
| Aspirin 300mg suppositories                                                                  | 2013341000033115  | 322232006         | Aspirin                                                   |
| Aspirin 150mg suppositories                                                                  | 2013441000033114  | 322233001         | Aspirin                                                   |
| Co-codaprin 8mg/400mg dispersible tablets                                                    | 371041000033112   | 322310004         | Aspirin/ Codeine<br>phosphate                             |
| Aspav dispersible tablets (Actavis UK Ltd)                                                   | 86841000033118    | 3690911000001103  | Aspirin/<br>Papaveretum                                   |
| Aspirin 500mg / Papaveretum 7.71mg dispersible tablets sugar free                            | 3849841000033110  | 322321008         | Aspirin/<br>Papaveretum                                   |
| MigraMax oral powder sachets (Zentiva)                                                       | 2086841000033117  | 3637911000001108  | Aspirin DL-<br>Lysine/<br>Metoclopramide<br>hydrochloride |
| Aspirin 900mg / Metoclopramide 10mg oral powder sachets sugar free                           | 3836841000033119  | 322784004         | Aspirin DL-<br>Lysine/<br>Metoclopramide<br>hydrochloride |
| Brufen Retard 800mg tablets (Mylan)                                                          | 159441000033110   | 368011000001100   | Ibuprofen                                                 |
| Ibuprofen 800mg modified-release tablets                                                     | 746941000033117   | 39110311000001101 | Ibuprofen                                                 |
| Ibuprofen 200mg / Phenylephrine 6.1mg tablets                                                | 12496141000033117 | 34878411000001108 | Ibuprofen/<br>Phenylephrine                               |

|                                                                           |                   |                   |                                       |
|---------------------------------------------------------------------------|-------------------|-------------------|---------------------------------------|
| Bisoprolol 10mg / Aspirin 100mg capsules                                  | 10025241000033112 | 28365311000001102 | Aspirin/<br>Bisoprolol<br>fumarate    |
| Bisoprolol 10mg / Aspirin 75mg capsules                                   | 10025141000033117 | 28365411000001109 | Aspirin/<br>Bisoprolol<br>fumarate    |
| Bisoprolol 5mg / Aspirin 100mg capsules                                   | 10025041000033116 | 28365611000001107 | Aspirin/<br>Bisoprolol<br>fumarate    |
| Bisoprolol 5mg / Aspirin 75mg capsules                                    | 10024941000033116 | 28365711000001103 | Aspirin/<br>Bisoprolol<br>fumarate    |
| Co-codaprin 8mg/400mg tablets                                             | 370941000033119   | 11762111000001100 | Aspirin/ Codeine<br>phosphate         |
| Imazin XL forte tablets (Napp Pharmaceuticals Ltd)                        | 1739641000033115  | 3461511000001104  | Aspirin/<br>Isosorbide<br>mononitrate |
| Aspirin 150mg / Isosorbide mononitrate 60mg<br>modified-release tablets   | 3162141000033112  | 35903011000001102 | Aspirin/<br>Isosorbide<br>mononitrate |
| Imazin XL tablets (Napp Pharmaceuticals Ltd)                              | 1739541000033116  | 3460911000001104  | Aspirin/<br>Isosorbide<br>mononitrate |
| Aspirin 75mg / Isosorbide mononitrate 60mg<br>modified-release tablets    | 3162041000033113  | 35903111000001101 | Aspirin/<br>Isosorbide<br>mononitrate |
| Nurofen Meltlets 200mg tablets (Reckitt Benckiser<br>Healthcare (UK) Ltd) | 2839541000033115  | 3869111000001103  | Ibuprofen                             |
| Ibuprofen 200mg orodispersible tablets sugar free                         | 2839441000033116  | 3875511000001104  | Ibuprofen                             |
| Aspirin 300mg tablets                                                     | 86641000033119    | 329525004         | Aspirin                               |
| Aspirin 300mg dispersible tablets                                         | 82841000033117    | 329526003         | Aspirin                               |
| Ibuprofen 200mg tablets                                                   | 747341000033119   | 329652003         | Ibuprofen                             |
| Cuprofen 200mg tablets (SSL International Plc)                            | 4432641000033114  | 640911000001100   | Ibuprofen                             |
| Brufen 200mg tablets (Abbott Laboratories Ltd)                            | 162841000033113   | 643711000001106   | Ibuprofen                             |
| Nurofen 200mg caplets (Reckitt Benckiser<br>Healthcare (UK) Ltd)          | 2970741000033111  | 621911000001109   | Ibuprofen                             |
| Arthrofen 200 tablets (Ashbourne Pharmaceuticals<br>Ltd)                  | 81641000033113    | 389511000001100   | Ibuprofen                             |
| Librofem 200mg tablets (LPC Medical (UK) Ltd)                             | 1627241000033117  | 901911000001103   | Ibuprofen                             |
| Advil 200mg tablets (Wyeth Consumer Healthcare)                           | 2968941000033119  | 8970311000001109  | Ibuprofen                             |
| Hedex Ibuprofen 200mg tablets (Omega Pharma<br>Ltd)                       | 2968541000033113  | 17042011000001106 | Ibuprofen                             |
| Motrin 400mg tablets (Pfizer Ltd)                                         | 939741000033119   | 868911000001103   | Ibuprofen                             |
| Arthrofen 400 tablets (Ashbourne Pharmaceuticals<br>Ltd)                  | 81741000033116    | 933011000001107   | Ibuprofen                             |
| Brufen 400mg tablets (Mylan)                                              | 162941000033117   | 263211000001109   | Ibuprofen                             |
| Ibuprofen 400mg tablets                                                   | 747441000033113   | 329653008         | Ibuprofen                             |
| Ibuprofen 600mg tablets                                                   | 747541000033114   | 329654002         | Ibuprofen                             |
| Brufen 600mg tablets (Mylan)                                              | 163041000033110   | 230111000001100   | Ibuprofen                             |
| Arthrofen 600 tablets (Ashbourne Pharmaceuticals<br>Ltd)                  | 81841000033114    | 415611000001108   | Ibuprofen                             |
| Motrin 600mg tablets (Pfizer Ltd)                                         | 939841000033112   | 550011000001109   | Ibuprofen                             |
| Ibuprofen 200mg / Codeine 12.8mg tablets                                  | 12708841000033116 | 329683004         | Codeine<br>phosphate/<br>Ibuprofen    |

|                                                                                   |                   |                   |                                             |
|-----------------------------------------------------------------------------------|-------------------|-------------------|---------------------------------------------|
| Nurofen Plus tablets (Reckitt Benckiser Healthcare (UK) Ltd)                      | 2228341000033113  | 3915411000001104  | Codeine phosphate/<br>Ibuprofen             |
| Solpaflex tablets (GlaxoSmithKline Consumer Healthcare)                           | 2968641000033114  | 3916211000001109  | Codeine phosphate/<br>Ibuprofen             |
| Cuprofen PLUS tablets (SSL International Plc)                                     | 3077941000033110  | 8092711000001106  | Codeine phosphate/<br>Ibuprofen             |
| Motrin 800mg tablets (Pfizer Ltd)                                                 | 939941000033116   | 62911000001102    | Ibuprofen                                   |
| Ibuprofen 800mg tablets                                                           | 746541000033111   | 329708004         | Ibuprofen                                   |
| Ibuprofen lysine 200mg tablets                                                    | 4661241000033110  | 4557011000001104  | Ibuprofen lysine                            |
| Disprin CV 300mg modified-release tablets (Reckitt Benckiser Healthcare (UK) Ltd) | 452541000033115   | 4532311000001104  | Aspirin                                     |
| Aspirin 300mg modified-release tablets                                            | 84441000033114    | 4558011000001103  | Aspirin                                     |
| Maximum Strength Aspro Clear 500mg effervescent tablets (Bayer Plc)               | 4431941000033114  | 4648711000001109  | Aspirin                                     |
| Aspro Clear 300mg effervescent tablets (Bayer Plc)                                | 4431841000033118  | 4649111000001101  | Aspirin                                     |
| Codafen Continus tablets (Napp Pharmaceuticals Ltd)                               | 336741000033117   | 3420111000001109  | Codeine phosphate/<br>Ibuprofen             |
| Ibuprofen 300mg modified-release / Codeine 20mg tablets                           | 3229141000033111  | 36045211000001108 | Codeine phosphate/<br>Ibuprofen             |
| Aspirin 500mg / Codeine 8mg dispersible tablets sugar free                        | 3934341000033112  | 4956111000001107  | Aspirin/ Codeine phosphate                  |
| Codis 500 dispersible tablets (Reckitt Benckiser Healthcare (UK) Ltd)             | 3934441000033118  | 4951811000001105  | Aspirin/ Codeine phosphate                  |
| Aspirin powder                                                                    | 2085241000033111  | 5145711000001107  | Aspirin                                     |
| Asasantin Retard capsules (Boehringer Ingelheim Ltd)                              | 1571541000033117  | 3292511000001108  | Aspirin/<br>Dipyridamole                    |
| Dipyridamole 200mg modified-release / Aspirin 25mg capsules                       | 3160741000033110  | 36069911000001109 | Aspirin/<br>Dipyridamole                    |
| Atransipar 200mg/25mg modified-release capsules (Par Laboratories Europe Ltd)     | 12352041000033117 | 34609311000001105 | Aspirin/<br>Dipyridamole                    |
| Molita 200mg/25mg modified-release capsules (Dr Reddy's Laboratories (UK) Ltd)    | 8619141000033116  | 23241511000001106 | Aspirin/<br>Dipyridamole                    |
| Ibuprofen 200mg / Pseudoephedrine hydrochloride 30mg tablets                      | 4123241000033119  | 407904005         | Ibuprofen/<br>Pseudoephedrine hydrochloride |
| Nurofen Cold and Flu tablets (Reckitt Benckiser Healthcare (UK) Ltd)              | 4123741000033113  | 4606211000001109  | Ibuprofen/<br>Pseudoephedrine hydrochloride |
| Dexibuprofen 300mg tablets                                                        | 3334141000033116  | 418352003         | Dexibuprofen                                |
| Seractil 300mg tablets (Gebro Pharma GmbH)                                        | 3334341000033118  | 35096411000001107 | Dexibuprofen                                |
| Dexibuprofen 400mg tablets                                                        | 3334241000033111  | 418855005         | Dexibuprofen                                |
| Seractil 400mg tablets (Thornton & Ross Ltd)                                      | 3334441000033112  | 9447611000001101  | Dexibuprofen                                |
| Nuromol 200mg/500mg tablets (Reckitt Benckiser Healthcare (UK) Ltd)               | 6386841000033117  | 18594011000001100 | Ibuprofen/<br>Paracetamol                   |
| Paracetamol 500mg / Ibuprofen 200mg tablets                                       | 6386741000033110  | 18595211000001106 | Ibuprofen/<br>Paracetamol                   |
